# Supplementary material for: Proteomic Analysis of a Rat Streptozotocin Model Shows Dysregulated Biological Pathways Implicated in Alzheimer’s Disease
Source: MDPI journal article supplement (doi:10.3390/ijms25052772), 2024-02-28
Supplement: s1 [file s1]

## **Supplementary Information**

### ***Proteomic analysis of a rat streptozotocin model shows dysregulated biological pathways implicated in Alzheimer's Disease***

**Esdras Matheus Gomes da Silva, Juliana S. G. Fischer, Isadora de Lourdes**

**Signorini Souza, Amanda Caroline Camillo Andrade, Paulo C. Carvalho,**

**Ricardo Lehtonen Rodrigues Souza, Maria Aparecida Barbato Frazão Vital and**

**Fabio Passetti**

This file contains the description of:

- **Supplementary Tables S1-4**

## **Supplementary Tables**

**Supplementary Table S1.** Proteins identified in the prefrontal cortex and hippocampus proteomes of the streptozotocin rat model and control (wild-type)

**Supplementary Table S2.** Peptides identified in the prefrontal cortex and hippocampus proteomes of the streptozotocin rat model and control (wild-type)

**Supplementary Table S3.** Protein quantification (normalized XIC) in the prefrontal cortex and hippocampus proteomes of the streptozotocin rat model and control (wild-type)

**Supplementary Table S4.** Fold change of proteins in the prefrontal cortex and hippocampus proteomes of the streptozotocin rat model and control (wild-type)
