# Supplementary material for: Proteomic Analysis of a Rat Streptozotocin Model Shows Dysregulated Biological Pathways Implicated in Alzheimer’s Disease
Source: Int J Mol Sci. 2024 Feb 28;25(5):2772. doi: 10.3390/ijms25052772 (PMC10931650; doi:10.3390/ijms25052772)
Supplement: Supplementary file 1 [file ijms-25-02772-s001.zip]

Archive with 5 entries (5 files):
- Supplementary.pdf
- Table S1.xlsx
- Table S2.xlsx
- Table S3.xlsx
- Table S4.xlsx
