# Supplementary material for: Proteomic Analysis of a Rat Streptozotocin Model Shows Dysregulated Biological Pathways Implicated in Alzheimer’s Disease
Source: Int J Mol Sci. 2024 Feb 28;25(5):2772. doi: 10.3390/ijms25052772 (PMC10931650; doi:10.3390/ijms25052772)
Supplement: Supplementary file 1 [file ijms-25-02772-s001.zip › Table S1.xlsx]

## Sheet: S1
Supplementary Table S1. Proteins identified in the prefrontal cortex and hippocampus proteomes of the streptozotocin rat model and control (wild-type)
Dataset	Class	Locus	Gene	Length	MolWt	SequenceCount	SpectrumCount	SpectrumCountUnique	Coverage	NSAF	ProteinScore	ContainsUniquePeptide	Description
Pre-frontal cortex	Streptozocin	P68370	Tuba1a	451	50085.6	191	5898	0	0.9024	0.0058754	567.616	0	tubulin, alpha 1A
Pre-frontal cortex	Streptozocin	ENSRNOT00000081355	Tuba1b	451	50101.6	194	5819	0	0.9024	0.0057968	573.2	0	tubulin, alpha 1B
Pre-frontal cortex	Streptozocin	ENSRNOT00000004797	Tuba4a	448	49874.4	175	5362	411	0.904	0.0053773	522.49	25	tubulin, alpha 4A
Pre-frontal cortex	Streptozocin	Q6AYZ1	Tuba1c	449	49887.5	187	5034	14	0.9065	0.0050371	545.591	3	tubulin, alpha 1C
Pre-frontal cortex	Streptozocin	ENSRNOT00000052352	Tuba3b	450	49909.6	131	4706	1	0.7067	0.0046984	379.681	1	tubulin, alpha 3B
Pre-frontal cortex	Streptozocin	ENSRNOT00000051483	Hba-a1	142	15300.8	56	1277	3	0.9225	0.0040403	172.811	2	hemoglobin alpha, adult chain 1
Pre-frontal cortex	Streptozocin	ENSRNOT00000048977	Hba-a2	142	15256.8	54	1274	0	0.8451	0.0040308	169.5	0	hemoglobin alpha, adult chain 2
Pre-frontal cortex	Streptozocin	P60711	Actb	375	41691.7	132	3340	0	0.832	0.0040015	360.48	0	actin, beta
Pre-frontal cortex	Streptozocin	P63259	Actg1	375	41747.8	131	3334	6	0.832	0.0039944	358.983	2	actin, gamma 1
Pre-frontal cortex	Streptozocin	ENSRNOT00000080216	Actb	378	42040.9	132	3340	0	0.8254	0.0039698	360.48	0	actin, beta
Pre-frontal cortex	Streptozocin	ENSRNOT00000074096	Tuba8	449	49987.5	103	3528	40	0.6481	0.0035302	298.566	7	tubulin, alpha 8
Pre-frontal cortex	Streptozocin	ENSRNOT00000086264	Tubb2a	445	49856.9	181	3410	0	0.8787	0.0034428	510.191	0	tubulin, beta 2A class IIa
Pre-frontal cortex	Streptozocin	ENSRNOT00000083705	Tubb2b	445	49902.9	178	3323	18	0.8697	0.0033549	502.062	1	tubulin, beta 2B class IIb
Pre-frontal cortex	Streptozocin	ENSRNOT00000075767	Tubb4a	444	49535.9	172	3277	424	0.8739	0.0033159	489.234	20	tubulin, beta 4A class IVa
Pre-frontal cortex	Streptozocin	ENSRNOT00000084917	Tubb5	444	49621	176	3246	80	0.8716	0.0032846	496.396	3	tubulin, beta 5 class I
Pre-frontal cortex	Streptozocin	ENSRNOT00000023611	Tubb2a	472	53139.6	181	3410	0	0.8284	0.0032458	510.191	0	tubulin, beta 2A class IIa
Pre-frontal cortex	Streptozocin	Q6P9T8	Tubb4b	445	49751	161	3124	0	0.8539	0.003154	461.702	0	tubulin, beta 4B class IVb
Pre-frontal cortex	Streptozocin	P04797	Gapdh	333	35787.2	95	2180	511	0.8619	0.0029412	254.563	16	glyceraldehyde-3-phosphate dehydrogenase
Pre-frontal cortex	Streptozocin	P69897-2	Tubb5	212	24237.6	78	1362	0	0.7453	0.0028864	186.971	0	Tubulin beta-5 chain
Pre-frontal cortex	Streptozocin	P02091	Hbb	147	15951.2	62	944	0	0.898	0.0028851	158.134	0	hemoglobin subunit beta
Pre-frontal cortex	Streptozocin	ENSRNOT00000090422	Hbb	147	15937.2	62	925	33	0.898	0.0028271	158.407	4	hemoglobin subunit beta
Pre-frontal cortex	Streptozocin	ENSRNOT00000013863	Tubb4b	548	61129.5	178	3385	0	0.8595	0.0027752	506.113	0	tubulin, beta 4B class IVb
Pre-frontal cortex	Streptozocin	ENSRNOT00000023452	Tubb3	450	50368.2	151	2739	862	0.8444	0.0027346	425.724	42	tubulin, beta 3 class III
Pre-frontal cortex	Streptozocin	ENSRNOT00000015122	Ckb	381	42680.3	91	2297	2216	0.8163	0.0027086	292.814	81	creatine kinase B
Pre-frontal cortex	Streptozocin	P11517	Hbb-bs	147	15954.3	50	697	43	0.8844	0.0021302	128.237	5	hemoglobin, beta adult s chain
Pre-frontal cortex	Streptozocin	ENSRNOT00000087661	Hbb-b1	147	15960.3	38	693	0	0.8095	0.002118	101	0	hemoglobin, beta adult major chain
Pre-frontal cortex	Streptozocin	P07323	Eno2	434	47092.9	81	1970	1127	0.7903	0.0020393	231.325	54	enolase 2
Pre-frontal cortex	Streptozocin	ENSRNOT00000078007	NA	225	24025.8	63	978	0	0	0.0019529	174.784	0	NA
Pre-frontal cortex	Streptozocin	ENSRNOT00000064679	Calm1	149	16808.8	38	603	504	0.8188	0.0018182	93.915	27	calmodulin 1
Pre-frontal cortex	Streptozocin	ENSRNOT00000087928	Aldoa	364	39309.3	69	1463	1058	0.9093	0.0018057	197.085	53	aldolase, fructose-bisphosphate A
Pre-frontal cortex	Streptozocin	ENSRNOT00000024947	Tubb6	447	50009.1	109	1783	96	0.6935	0.0017921	276.651	9	tubulin, beta 6 class V
Pre-frontal cortex	Streptozocin	ENSRNOT00000081579	Eno1	434	47080.2	75	1704	293	0.765	0.001764	198.862	6	enolase 1
Pre-frontal cortex	Streptozocin	ENSRNOT00000012996	Dpysl2	572	62220.6	112	2236	1951	0.8287	0.0017563	338.757	93	dihydropyrimidinase-like 2
Pre-frontal cortex	Streptozocin	ENSRNOT00000003248	Uchl1	223	24804.4	54	856	437	0.8879	0.0017246	161.802	18	ubiquitin C-terminal hydrolase L1
Pre-frontal cortex	Streptozocin	ENSRNOT00000015332	Pkm	531	57762.9	106	1975	287	0.7928	0.001671	296.038	11	pyruvate kinase M1/2
Pre-frontal cortex	Streptozocin	P10111	Ppia	164	17844.8	45	606	582	0.7866	0.0016601	120.224	41	peptidylprolyl isomerase A
Pre-frontal cortex	Streptozocin	ENSRNOT00000001743	S100b	92	10719	22	321	321	0.7935	0.0015676	67.319	22	S100 calcium binding protein B
Pre-frontal cortex	Streptozocin	ENSRNOT00000080676	Ywhaz	245	27735.7	58	828	576	0.8163	0.0015184	138.107	29	tyrosine 3-monooxygenase/tryptophan 5-monooxygenase activation protein, zeta
Pre-frontal cortex	Streptozocin	P09951-2	Syn1	668	69848.5	99	2257	65	0.8548	0.001518	297.547	2	Synapsin-1; Neuronal phosphoprotein that coats synaptic vesicles, binds to the cytoskeleton, and is believed to function in the regulation of neurotransmitter release.
Pre-frontal cortex	Streptozocin	ENSRNOT00000089125	Hbb Glna4 rCG_39881	147	15994.2	27	495	65	0.8095	0.0015129	69.258	5	Globin a4 (Hemoglobin subunit beta-1) (RCG39881, isoform CRA_b)
Pre-frontal cortex	Streptozocin	P11980-2	Pkm	531	57726	98	1766	0	0.7853	0.0014942	280.401	0	NA
Pre-frontal cortex	Streptozocin	ENSRNOT00000015962	Cfl1	166	18502.7	30	548	391	0.7048	0.0014832	83.961	15	cofilin 1
Pre-frontal cortex	Streptozocin	ENSRNOT00000017468	Ldha	332	36409.3	62	1087	977	0.8434	0.001471	162.167	49	lactate dehydrogenase A
Pre-frontal cortex	Streptozocin	ENSRNOT00000014250	Syn1	704	73924.6	103	2300	97	0.8622	0.0014678	306.035	5	synapsin I
Pre-frontal cortex	Streptozocin	ENSRNOT00000007100	Ywhae	255	29137.4	59	826	686	0.7922	0.0014553	142.611	46	tyrosine 3-monooxygenase/tryptophan 5-monooxygenase activation protein, epsilon
Pre-frontal cortex	Streptozocin	P02688-4	Mbp	128	14184.2	33	406	0	0.5625	0.001425	68.57	0	Myelin basic protein, MBP
Pre-frontal cortex	Streptozocin	ENSRNOT00000034026	LOC685431	433	47077.4	60	1309	0	0.6397	0.0013582	158.095	0	similar to Alpha-enolase (2-phospho-D-glycerate hydro-lyase) (Non-neural enolase) (NNE) (Enolase 1)
Pre-frontal cortex	Streptozocin	P48500	Tpi1	249	26813.7	37	743	147	0.8594	0.0013406	112.376	7	triosephosphate isomerase 1
Pre-frontal cortex	Streptozocin	ENSRNOT00000008002	NA	206	21667.2	31	610	0	0.3738	0.0013304	86.343	0	NA
Pre-frontal cortex	Streptozocin	ENSRNOT00000001500	Pebp1	187	20770.4	37	542	542	0.8824	0.0013022	102.86	37	phosphatidylethanolamine binding protein 1
Pre-frontal cortex	Streptozocin	ENSRNOT00000039144	LOC100364062	487	52824.4	85	1384	11	0.8008	0.0012768	230.91	6	M2 pyruvate kinase-like
Pre-frontal cortex	Streptozocin	ENSRNOT00000086036	Aldoc	363	39241.2	62	1027	372	0.8788	0.0012711	175.628	20	aldolase, fructose-bisphosphate C
Pre-frontal cortex	Streptozocin	P02688-2	Mbp	169	18458.4	39	478	0	0.5562	0.0012707	83.554	0	Myelin basic protein, MBP
Pre-frontal cortex	Streptozocin	ENSRNOT00000043042	AABR07028748.1	234	24789.5	14	661	10	0.3205	0.0012691	37.62	3	Gp_dh_N domain-containing protein
Pre-frontal cortex	Streptozocin	P02688-3	Mbp	154	17196.8	35	423	0	0.5844	0.001234	72.178	0	Myelin basic protein, MBP
Pre-frontal cortex	Streptozocin	P02688-5	Mbp	158	17211.7	35	426	0	0.538	0.0012113	73.393	0	Myelin basic protein, MBP
Pre-frontal cortex	Streptozocin	ENSRNOT00000073655	RGD1563294	433	46896.1	58	1161	3	0.6097	0.0012046	141.011	1	similar to Alpha enolase (2-phospho-D-glycerate hydro-lyase)
Pre-frontal cortex	Streptozocin	ENSRNOT00000005987	Cltc	1675	191420	303	4454	40	0.8143	0.0011947	812.665	1	clathrin heavy chain
Pre-frontal cortex	Streptozocin	ENSRNOT00000071965	Pgam1	254	28795.9	41	671	595	0.7717	0.0011869	112.854	31	phosphoglycerate mutase 1
Pre-frontal cortex	Streptozocin	P11442	Cltc	1675	191459	302	4414	0	0.8072	0.0011839	809.296	0	clathrin heavy chain
Pre-frontal cortex	Streptozocin	ENSRNOT00000084730	Ywhag	247	28266.9	47	644	389	0.7571	0.0011714	119.343	24	tyrosine 3-monooxygenase/tryptophan 5-monooxygenase activation protein, gamma
Pre-frontal cortex	Streptozocin	Q63537-2	Syn2	479	52403.4	84	1246	30	0.8267	0.0011687	239.784	5	Synapsin-2 (Synapsin II)
Pre-frontal cortex	Streptozocin	P35213-2	Ywhab	244	27786.7	42	634	0	0.7582	0.0011674	104.249	0	14-3-3 protein beta/alpha (Prepronerve growth factor RNH-1) (Protein kinase C inhibitor protein 1, KCIP-1) [Cleaved into: 14-3-3 protein beta/alpha, N-terminally processed ]
Pre-frontal cortex	Streptozocin	ENSRNOT00000067846	Ppp3r1	170	19269.6	23	441	0	0.8471	0.0011655	68.619	0	protein phosphatase 3, regulatory subunit B, alpha
Pre-frontal cortex	Streptozocin	ENSRNOT00000016981	Ywhab	246	28018.8	42	634	0	0.752	0.0011579	104.249	0	tyrosine 3-monooxygenase/tryptophan 5-monooxygenase activation protein, beta
Pre-frontal cortex	Streptozocin	ENSRNOT00000021178	Stxbp1	594	67507.9	92	1530	40	0.7761	0.0011572	257.886	2	syntaxin binding protein 1
Pre-frontal cortex	Streptozocin	ENSRNOT00000003611	Nme2	152	17253.9	26	391	191	0.7961	0.0011557	63.546	10	NME/NM23 nucleoside diphosphate kinase 2
Pre-frontal cortex	Streptozocin	ENSRNOT00000017965	Ldhb	334	36571.1	58	855	775	0.8263	0.0011501	140.301	47	lactate dehydrogenase B
Pre-frontal cortex	Streptozocin	P61206	Arf3	181	20569.7	35	463	0	0.8011	0.0011493	80.85	0	ADP-ribosylation factor 3
Pre-frontal cortex	Streptozocin	P61765-2	Stxbp1 Unc18a	603	68674.2	92	1536	47	0.7711	0.0011444	258.254	3	Syntaxin-binding protein 1 (N-Sec1) (Protein unc-18 homolog 1, Unc18-1) (Protein unc-18 homolog A, Unc-18A) (p67) (rbSec1)
Pre-frontal cortex	Streptozocin	P02688	Mbp	195	21471	41	495	0	0.5744	0.0011405	87.162	0	myelin basic protein
Pre-frontal cortex	Streptozocin	ENSRNOT00000089814	Gdi1	447	50486.1	85	1127	867	0.8456	0.0011327	249.804	67	GDP dissociation inhibitor 1
Pre-frontal cortex	Streptozocin	ENSRNOT00000087176	Arf3	184	20852.9	35	463	0	0.788	0.0011305	80.85	0	ADP-ribosylation factor 3
Pre-frontal cortex	Streptozocin	ENSRNOT00000026373	Gnao1	354	40024.9	58	888	408	0.7966	0.001127	159.406	19	G protein subunit alpha o1
Pre-frontal cortex	Streptozocin	P62815	Atp6v1b2	511	56496.8	72	1271	1000	0.8571	0.0011175	188.127	49	ATPase H+ transporting V1 subunit B2
Pre-frontal cortex	Streptozocin	ENSRNOT00000087181	Arf3	187	21128.9	35	463	0	0.7754	0.0011124	80.85	0	ADP-ribosylation factor 3
Pre-frontal cortex	Streptozocin	P00507	Got2	430	47266.1	73	1050	921	0.7953	0.0010971	197.501	62	glutamic-oxaloacetic transaminase 2
Pre-frontal cortex	Streptozocin	P68035	Actc1	377	41973.9	68	915	0	0.7162	0.0010904	149.808	0	actin, alpha, cardiac muscle 1
Pre-frontal cortex	Streptozocin	ENSRNOT00000080028	Arf1	181	20665.7	33	437	19	0.8011	0.0010847	75.964	2	ADP-ribosylation factor 1
Pre-frontal cortex	Streptozocin	ENSRNOT00000083224	NA	180	20441.6	31	433	0	0.7222	0.0010808	69.075	0	NA
Pre-frontal cortex	Streptozocin	P68136	Acta1	377	42005.8	65	906	4	0.7135	0.0010797	143.861	1	actin, alpha 1, skeletal muscle
Pre-frontal cortex	Streptozocin	ENSRNOT00000070925	LOC100362738	486	52721.3	76	1162	6	0.7634	0.0010742	219.56	1	M2 pyruvate kinase-like
Pre-frontal cortex	Streptozocin	ENSRNOT00000091773	LOC500959 AC094212.1	253	27379	31	599	3	0.6996	0.0010637	91.998	1	Triosephosphate isomerase, EC 5.3.1.1
Pre-frontal cortex	Streptozocin	O35244	Prdx6	224	24785	31	529	525	0.8125	0.001061	88.865	30	peroxiredoxin 6
Pre-frontal cortex	Streptozocin	Q63754	Sncb	137	14477.1	19	323	290	0.8102	0.0010592	69.842	15	synuclein, beta
Pre-frontal cortex	Streptozocin	ENSRNOT00000015019	Ppp2r1a	386	41331.2	67	907	580	0	0.0010557	168.467	40	protein phosphatase 2 scaffold subunit A alpha
Pre-frontal cortex	Streptozocin	ENSRNOT00000011292	Syn2	586	63354.7	89	1370	0	0.715	0.0010504	251.235	0	synapsin II
Pre-frontal cortex	Streptozocin	Q63537	Syn2	586	63398.8	89	1370	0	0.715	0.0010504	251.235	0	synapsin II
Pre-frontal cortex	Streptozocin	P63039	Hspd1	573	60899.4	63	1309	1288	0.7906	0.0010264	178.997	61	heat shock protein family D (Hsp60) member 1
Pre-frontal cortex	Streptozocin	ENSRNOT00000012608	Fkbp1a	108	11897.1	11	246	246	0.713	0.0010233	36.61	11	FKBP prolyl isomerase 1A
Pre-frontal cortex	Streptozocin	ENSRNOT00000003658	Nme1	152	17163.8	28	345	145	0.8618	0.0010197	69.682	12	NME/NM23 nucleoside diphosphate kinase 1
Pre-frontal cortex	Streptozocin	ENSRNOT00000085653	Pgk1	403	43126.4	58	902	0	0.7891	0.0010056	158.546	0	phosphoglycerate kinase 1
Pre-frontal cortex	Streptozocin	ENSRNOT00000077604	Pgk1	417	44492	60	933	28	0.8177	0.0010052	163.49	1	phosphoglycerate kinase 1
Pre-frontal cortex	Streptozocin	ENSRNOT00000005612	Eno3	434	46966.3	36	965	3	0.4585	0.000999	90.01	1	enolase 3
Pre-frontal cortex	Streptozocin	P21575-4	Dnm1 Dnm	856	96191.4	140	1900	0	0.7979	0.0009972	361.704	0	Dynamin-1, EC 3.6.5.5 (B-dynamin) (D100) (Dynamin, brain)
Pre-frontal cortex	Streptozocin	P21575-2	Dnm1 Dnm	851	95849.2	138	1873	0	0.7861	0.0009888	356.596	0	Dynamin-1, EC 3.6.5.5 (B-dynamin) (D100) (Dynamin, brain)
Pre-frontal cortex	Streptozocin	P62630	Eef1a1	462	50064.1	48	1015	45	0.658	0.000987	138.171	3	eukaryotic translation elongation factor 1 alpha 1
Pre-frontal cortex	Streptozocin	ENSRNOT00000026391	Rab3a	220	24936.1	26	483	145	0.7	0.0009864	67.707	9	RAB3A, member RAS oncogene family
Pre-frontal cortex	Streptozocin	ENSRNOT00000015186	Prdx3	116	12678.1	19	254	1	0	0.0009838	52.121	1	peroxiredoxin 3
Pre-frontal cortex	Streptozocin	ENSRNOT00000093467	Atp6v1a	617	68203.5	87	1350	372	0.8622	0.000983	245.098	24	ATPase H+ transporting V1 subunit A
Pre-frontal cortex	Streptozocin	ENSRNOT00000047921	Dnm1	864	97215.9	140	1888	0	0.8044	0.0009818	360.212	0	dynamin 1
Pre-frontal cortex	Streptozocin	ENSRNOT00000010429	Arf5	180	20498.6	27	390	79	0.8889	0.0009734	66.356	6	ADP-ribosylation factor 5
Pre-frontal cortex	Streptozocin	P21575-8	Dnm1 Dnm	856	96320.5	138	1852	0	0.7967	0.000972	355.022	0	Dynamin-1, EC 3.6.5.5 (B-dynamin) (D100) (Dynamin, brain)
Pre-frontal cortex	Streptozocin	P62632	Eef1a2	463	50404.3	50	998	439	0.6739	0.0009684	144.685	33	eukaryotic translation elongation factor 1 alpha 2
Pre-frontal cortex	Streptozocin	P21575-6	Dnm1 Dnm	851	95978.3	136	1825	0	0.785	0.0009635	349.915	0	Dynamin-1, EC 3.6.5.5 (B-dynamin) (D100) (Dynamin, brain)
Pre-frontal cortex	Streptozocin	P21575-3	Dnm1 Dnm	814	92299.2	128	1743	0	0.7101	0.000962	329.59	0	Dynamin-1, EC 3.6.5.5 (B-dynamin) (D100) (Dynamin, brain)
Pre-frontal cortex	Streptozocin	ENSRNOT00000004799	Prdx2	198	21766.1	26	423	73	0.8333	0.0009598	77.105	2	peroxiredoxin 2
Pre-frontal cortex	Streptozocin	P21575-5	Dnm1 Dnm	864	97345	138	1840	0	0.8032	0.0009568	353.53	0	Dynamin-1, EC 3.6.5.5 (B-dynamin) (D100) (Dynamin, brain)
Pre-frontal cortex	Streptozocin	ENSRNOT00000032613	Gpi	558	62769.1	84	1187	1175	0.6416	0.0009557	207.801	79	glucose-6-phosphate isomerase
Pre-frontal cortex	Streptozocin	P02770	Alb	608	68668.1	83	1270	25	0.7434	0.0009385	227.79	2	albumin
Pre-frontal cortex	Streptozocin	P21575-7	Dnm1 Dnm	814	92428.3	126	1695	0	0.7088	0.0009355	322.909	0	Dynamin-1, EC 3.6.5.5 (B-dynamin) (D100) (Dynamin, brain)
Pre-frontal cortex	Streptozocin	ENSRNOT00000003921	Alb	608	68696.1	83	1264	0	0.7319	0.000934	229.073	0	albumin
Pre-frontal cortex	Streptozocin	ENSRNOT00000015808	Mtpn	118	12834.6	14	242	242	0.7288	0.0009214	43.125	14	myotrophin
Pre-frontal cortex	Streptozocin	P63100-2	Ppp3r1 Cna2 Cnb	216	24945.5	23	441	0	0.6667	0.0009173	68.619	0	Calcineurin subunit B type 1 (Protein phosphatase 2B regulatory subunit 1) (Protein phosphatase 3 regulatory subunit B alpha isoform 1)
Pre-frontal cortex	Streptozocin	Q05175	Basp1	220	21759.4	16	438	161	0.6182	0.0008945	61.035	2	brain abundant, membrane attached signal protein 1
Pre-frontal cortex	Streptozocin	ENSRNOT00000046388	Aldoc	192	20644.6	32	382	0	0.776	0.0008939	81.949	0	aldolase, fructose-bisphosphate C
Pre-frontal cortex	Streptozocin	ENSRNOT00000052292	Hba-a3	142	15497	23	279	101	0.831	0.0008827	60.948	7	hemoglobin alpha, adult chain 3
Pre-frontal cortex	Streptozocin	ENSRNOT00000083468	Acta2	376	41879.7	59	728	0	0.7181	0.0008699	129.155	0	actin alpha 2, smooth muscle
Pre-frontal cortex	Streptozocin	P62738	Acta2	377	41963.8	59	728	0	0.7162	0.0008676	129.155	0	actin alpha 2, smooth muscle
Pre-frontal cortex	Streptozocin	P04636	Mdh2	338	35642.8	53	651	651	0.8195	0.0008653	146.133	53	malate dehydrogenase 2
Pre-frontal cortex	Streptozocin	P11232	Txn1	105	11647.6	12	200	189	0.6476	0.0008558	27.435	11	thioredoxin 1
Pre-frontal cortex	Streptozocin	ENSRNOT00000085735	Ywhah	246	28176	43	467	9	0.7724	0.0008529	104.167	2	tyrosine 3-monooxygenase/tryptophan 5-monooxygenase activation protein, eta
Pre-frontal cortex	Streptozocin	ENSRNOT00000007609	Vsnl1	191	22110	36	362	294	0.8115	0.0008515	81.43	30	visinin-like 1
Pre-frontal cortex	Streptozocin	ENSRNOT00000077786	Ywhaq	245	27742.8	38	464	264	0.7429	0.0008509	92.21	21	tyrosine 3-monooxygenase/tryptophan 5-monooxygenase activation protein, theta
Pre-frontal cortex	Streptozocin	P63269	Actg2	376	41831.8	58	712	0	0.6835	0.0008508	126.162	0	actin gamma 2, smooth muscle
Pre-frontal cortex	Streptozocin	P63018	Hspa8	646	70809.2	82	1218	261	0.7461	0.0008471	213.66	11	heat shock protein family A (Hsp70) member 8
Pre-frontal cortex	Streptozocin	P82995	Hsp90aa1	733	84743.8	99	1381	801	0.6617	0.0008465	250.58	51	heat shock protein 90 alpha family class A member 1
Pre-frontal cortex	Streptozocin	ENSRNOT00000006361	Nsf	744	82558.9	103	1400	0	0.8212	0.0008454	251.985	0	N-ethylmaleimide sensitive factor, vesicle fusing ATPase
Pre-frontal cortex	Streptozocin	Q99NA5	Idh3a	366	39570	49	687	0	0.6257	0.0008433	116.642	0	isocitrate dehydrogenase (NAD(+)) 3 catalytic subunit alpha
Pre-frontal cortex	Streptozocin	P49432	Pdhb	359	38939	55	673	0	0.8078	0.0008422	148.044	0	pyruvate dehydrogenase E1 subunit beta
Pre-frontal cortex	Streptozocin	ENSRNOT00000087824	Nsf	748	82988.2	103	1400	0	0.8168	0.0008409	251.985	0	N-ethylmaleimide sensitive factor, vesicle fusing ATPase
Pre-frontal cortex	Streptozocin	Q9QUL6	Nsf	744	82582	101	1374	0	0.8024	0.0008297	246.971	0	N-ethylmaleimide sensitive factor, vesicle fusing ATPase
Pre-frontal cortex	Streptozocin	ENSRNOT00000024711	Park7	189	19943.4	23	349	108	0.7513	0.0008296	62.515	8	Parkinsonism associated deglycase
Pre-frontal cortex	Streptozocin	ENSRNOT00000026063	Stx1b	288	33205.8	33	529	481	0.5938	0.0008252	98.567	27	syntaxin 1B
Pre-frontal cortex	Streptozocin	ENSRNOT00000006483	Arf2	181	20714.7	29	331	3	0.6464	0.0008216	66.654	1	ADP-ribosylation factor 2
Pre-frontal cortex	Streptozocin	Q9ER34	Aco2	780	85362	82	1426	1419	0.7449	0.0008214	241.922	81	aconitase 2
Pre-frontal cortex	Streptozocin	ENSRNOT00000024952	Gdi2	445	50486.7	58	813	553	0.8157	0.0008208	159.629	40	GDP dissociation inhibitor 2
Pre-frontal cortex	Streptozocin	P50408	Atp6v1f	119	13344	11	217	184	0.6891	0.0008193	29.619	8	ATPase H+ transporting V1 subunit F
Pre-frontal cortex	Streptozocin	ENSRNOT00000018118	Cdc42	191	21278.9	22	348	14	0.8377	0.0008186	58.336	1	cell division cycle 42
Pre-frontal cortex	Streptozocin	ENSRNOT00000075480	Glul	373	42222.3	50	678	678	0.748	0.0008166	126.04	50	glutamate-ammonia ligase
Pre-frontal cortex	Streptozocin	Q8CFN2-2	Cdc42	191	21250.9	22	346	0	0.8377	0.0008139	58.358	0	Cell division control protein 42 homolog, EC 3.6.5.2
Pre-frontal cortex	Streptozocin	P30904	Mif	115	12451.2	16	208	208	0.8957	0.0008126	52.45	16	macrophage migration inhibitory factor
Pre-frontal cortex	Streptozocin	ENSRNOT00000015102	Idh3a	382	41131.9	49	687	0	0.5995	0.000808	116.642	0	isocitrate dehydrogenase (NAD(+)) 3 catalytic subunit alpha
Pre-frontal cortex	Streptozocin	P11275	Camk2a	478	54062.5	59	854	0	0.7259	0.0008027	156.898	0	calcium/calmodulin-dependent protein kinase II alpha
Pre-frontal cortex	Streptozocin	ENSRNOT00000039247	Snca	140	14488.2	19	248	44	0.7929	0.0007959	57.548	4	synuclein alpha
Pre-frontal cortex	Streptozocin	P35704	Prdx2	198	21752.1	24	350	0	0.7374	0.0007942	69.779	0	peroxiredoxin 2
Pre-frontal cortex	Streptozocin	O88989	Mdh1	334	36442	45	588	588	0.7006	0.0007909	109.706	45	malate dehydrogenase 1
Pre-frontal cortex	Streptozocin	ENSRNOT00000041533	Camk2a	475	53990.6	57	828	0	0.7053	0.0007832	152.255	0	calcium/calmodulin-dependent protein kinase II alpha
Pre-frontal cortex	Streptozocin	P13221	Got1	413	46381.5	49	718	711	0.816	0.0007811	131.599	48	glutamic-oxaloacetic transaminase 1
Pre-frontal cortex	Streptozocin	ENSRNOT00000040540	Ndrg2	357	39212.3	38	618	0	0.8067	0.0007777	118.05	0	NDRG family member 2
Pre-frontal cortex	Streptozocin	Q8VBU2-2	Ndrg2	357	39227.3	38	618	0	0.8067	0.0007777	118.05	0	Protein NDRG2 (Antidepressant-related protein ADRG123) (N-myc downstream-regulated gene 2 protein) (NDRG1-related protein)
Pre-frontal cortex	Streptozocin	ENSRNOT00000065334	Crmp1	572	62138.6	67	988	808	0.8007	0.000776	193.499	54	collapsin response mediator protein 1
Pre-frontal cortex	Streptozocin	ENSRNOT00000080177	Camk2a	475	53990.5	56	819	0	0.7032	0.0007746	148.886	0	calcium/calmodulin-dependent protein kinase II alpha
Pre-frontal cortex	Streptozocin	ENSRNOT00000029025	Cdc42	191	21227	22	329	60	0.8272	0.0007739	58.044	1	cell division cycle 42
Pre-frontal cortex	Streptozocin	ENSRNOT00000022122	AABR07041179.1	130	13975	18	222	0	0.3692	0.0007672	44.413	0	Gp_dh_N domain-containing protein
Pre-frontal cortex	Streptozocin	P10860	Glud1	558	61359.3	69	948	945	0.681	0.0007633	175.624	68	glutamate dehydrogenase 1
Pre-frontal cortex	Streptozocin	ENSRNOT00000086769	Ywhah	274	31661.9	42	465	7	0.6934	0.0007625	101.047	1	tyrosine 3-monooxygenase/tryptophan 5-monooxygenase activation protein, eta
Pre-frontal cortex	Streptozocin	ENSRNOT00000030148	AC107446.2	325	34971.8	35	545	4	0.3723	0.0007534	89.311	2	Gp_dh_N domain-containing protein
Pre-frontal cortex	Streptozocin	P37805	Tagln3	199	22468.2	21	333	282	0.7889	0.0007518	51.118	17	transgelin 3
Pre-frontal cortex	Streptozocin	ENSRNOT00000085897	Ndrg2	371	40720.1	38	618	0	0.7951	0.0007484	119.412	0	NDRG family member 2
Pre-frontal cortex	Streptozocin	Q8VBU2	Ndrg2	371	40735.1	38	618	0	0.7951	0.0007484	119.412	0	NDRG family member 2
Pre-frontal cortex	Streptozocin	P63041	Cplx1	134	15094.5	15	223	195	0.5149	0.0007477	38.589	11	complexin 1
Pre-frontal cortex	Streptozocin	ENSRNOT00000087976	NA	219	24858.4	19	363	0	0.5388	0.0007447	57.609	0	NA
Pre-frontal cortex	Streptozocin	ENSRNOT00000089230	Ckmt1	418	46914.2	38	692	73	0.567	0.0007438	106.601	2	creatine kinase, mitochondrial 1
Pre-frontal cortex	Streptozocin	ENSRNOT00000017692	Arf4	180	20365.6	26	298	57	0.85	0.0007438	56.694	7	ADP-ribosylation factor 4
Pre-frontal cortex	Streptozocin	ENSRNOT00000085799	Ap2b1	937	104468	105	1548	0	0.7289	0.0007422	274.235	0	adaptor related protein complex 2 subunit beta 1
Pre-frontal cortex	Streptozocin	P62898	Cycs	105	11580	10	173	161	0.5714	0.0007402	29.414	9	cytochrome c, somatic
Pre-frontal cortex	Streptozocin	P62944-2	Ap2b1 Clapb1	951	105607	105	1548	0	0.7182	0.0007313	274.235	0	AP-2 complex subunit beta (AP105B) (Adaptor protein complex AP-2 subunit beta) (Adaptor-related protein complex 2 subunit beta) (Beta-2-adaptin) (Beta-adaptin) (Clathrin assembly protein complex 2 beta large chain) (Plasma membrane adaptor HA2/AP2 adaptin beta subunit)
Pre-frontal cortex	Streptozocin	P50554	Abat	500	56401.4	53	812	812	0.806	0.0007296	150.769	53	4-aminobutyrate aminotransferase
Pre-frontal cortex	Streptozocin	ENSRNOT00000041789	Gnb1	340	37335	34	550	268	0.6529	0.0007268	99.206	17	G protein subunit beta 1
Pre-frontal cortex	Streptozocin	ENSRNOT00000077171	Cnrip1	164	18628.6	16	264	252	0.7012	0.0007232	42.542	15	cannabinoid receptor interacting protein 1
Pre-frontal cortex	Streptozocin	P26772	Hspe1	102	10876.9	14	163	96	0.6667	0.000718	28.286	9	10 kDa heat shock protein, mitochondrial, Hsp10 (10 kDa chaperonin) (Chaperonin 10, CPN10)
Pre-frontal cortex	Streptozocin	P13233	Cnp	420	47220.5	49	671	649	0.681	0.0007178	128.717	47	2',3'-cyclic nucleotide 3' phosphodiesterase
Pre-frontal cortex	Streptozocin	ENSRNOT00000083212	Pdhb	423	46144.9	55	673	0	0.6856	0.0007148	148.044	0	pyruvate dehydrogenase E1 subunit beta
Pre-frontal cortex	Streptozocin	ENSRNOT00000070812	Pea15	130	15012.8	17	206	202	0.7231	0.0007119	46.95	15	proliferation and apoptosis adaptor protein 15
Pre-frontal cortex	Streptozocin	P08009	Gstm7	218	25646	34	344	23	0.8349	0.0007089	77.534	2	glutathione S-transferase, mu 7
Pre-frontal cortex	Streptozocin	ENSRNOT00000072589	Cfl2	166	18679.8	20	261	123	0.6988	0.0007064	48.763	7	cofilin 2
Pre-frontal cortex	Streptozocin	P86252	Pura	138	15294.6	15	216	8	0.8841	0.0007032	44.595	1	Transcriptional activator protein Pur-alpha (Purine-rich single-stranded DNA-binding protein alpha)
Pre-frontal cortex	Streptozocin	ENSRNOT00000054957	Arhgdia	204	23374.8	22	319	317	0.6225	0.0007025	58.363	21	Rho GDP dissociation inhibitor alpha
Pre-frontal cortex	Streptozocin	ENSRNOT00000009153	Hpca	193	22395	27	299	96	0.8083	0.000696	63.689	9	hippocalcin
Pre-frontal cortex	Streptozocin	P59215-2	Gnao1	354	40037	43	542	43	0.7655	0.0006879	114.593	2	Guanine nucleotide-binding protein G(o) subunit alpha
Pre-frontal cortex	Streptozocin	Q9R063-2	Prdx5	162	17006	16	246	0	0.679	0.0006822	42.896	0	Peroxiredoxin-5, mitochondrial, EC 1.11.1.24 (Antioxidant enzyme B166, AOEB166) (PLP) (Peroxiredoxin V, Prx-V) (Peroxisomal antioxidant enzyme) (Thioredoxin peroxidase PMP20) (Thioredoxin-dependent peroxiredoxin 5)
Pre-frontal cortex	Streptozocin	P21707	Syt1	421	47350.7	48	639	453	0.6152	0.0006819	134.146	31	synaptotagmin 1
Pre-frontal cortex	Streptozocin	ENSRNOT00000074347	Hpcal4	191	22212.9	26	289	221	0.822	0.0006798	62.231	20	hippocalcin-like 4
Pre-frontal cortex	Streptozocin	P16086	Sptan1	2472	284444	270	3697	1854	0.7395	0.0006719	780.379	137	spectrin, alpha, non-erythrocytic 1
Pre-frontal cortex	Streptozocin	ENSRNOT00000033726	Cs	466	51779.5	56	693	107	0.6781	0.0006681	138.88	7	citrate synthase
Pre-frontal cortex	Streptozocin	P25809	Ckmt1 Ckmt	418	46981.3	37	621	2	0.5144	0.0006675	98.047	1	Creatine kinase U-type, mitochondrial, EC 2.7.3.2 (Acidic-type mitochondrial creatine kinase, Mia-CK) (Ubiquitous mitochondrial creatine kinase, U-MtCK)
Pre-frontal cortex	Streptozocin	ENSRNOT00000024775	Gda	454	50850.7	50	664	24	0.8502	0.0006571	136.3	2	guanine deaminase
Pre-frontal cortex	Streptozocin	ENSRNOT00000058092	Ap2m1	434	49477	47	629	0	0.5945	0.0006511	126.463	0	adaptor related protein complex 2 subunit mu 1
Pre-frontal cortex	Streptozocin	ENSRNOT00000088821	Ap2m1	435	49605	47	629	0	0.5931	0.0006496	126.463	0	adaptor related protein complex 2 subunit mu 1
Pre-frontal cortex	Streptozocin	ENSRNOT00000079640	Sptan1	1300	149382	134	1872	0	0.7338	0.000647	391.7	0	spectrin, alpha, non-erythrocytic 1
Pre-frontal cortex	Streptozocin	ENSRNOT00000049601	Stx1a	288	33028.7	30	414	366	0.6285	0.0006458	88.841	24	syntaxin 1A
Pre-frontal cortex	Streptozocin	ENSRNOT00000036217	AABR07054368.1	361	38613.1	39	516	0	0.7175	0.0006422	110.143	0	Tr-type G domain-containing protein
Pre-frontal cortex	Streptozocin	Q01986	Map2k1	393	43419.3	45	561	400	0.7405	0.0006413	110.222	31	mitogen activated protein kinase kinase 1
Pre-frontal cortex	Streptozocin	ENSRNOT00000092979	LOC680491	228	25606.9	26	325	0	0.5395	0.0006404	62.871	0	similar to heat shock protein 1, alpha
Pre-frontal cortex	Streptozocin	ENSRNOT00000021458	Rap1gds1	478	52197.6	52	679	21	0.8305	0.0006382	145.357	2	Rap1 GTPase-GDP dissociation stimulator 1
Pre-frontal cortex	Streptozocin	ENSRNOT00000026920	Hsp90ab1	724	83211.1	81	1027	0	0.6782	0.0006373	207.838	0	heat shock protein 90 alpha family class B member 1
Pre-frontal cortex	Streptozocin	ENSRNOT00000073915	Basp1	219	21688.4	17	310	33	0.6119	0.000636	61.426	3	brain abundant, membrane attached signal protein 1
Pre-frontal cortex	Streptozocin	ENSRNOT00000079108	Sptan1	1296	149055	131	1831	0	0.7029	0.0006347	381.305	0	spectrin, alpha, non-erythrocytic 1
Pre-frontal cortex	Streptozocin	ENSRNOT00000043627	Map2	1825	198324	161	2578	0	0.743	0.0006346	472.747	0	microtubule-associated protein 2
Pre-frontal cortex	Streptozocin	O35077	Gpd1	349	37410.2	35	492	464	0.8682	0.0006334	92.753	32	glycerol-3-phosphate dehydrogenase 1
Pre-frontal cortex	Streptozocin	ENSRNOT00000091697	Sptan1	1321	151891	133	1862	0	0.704	0.0006333	387.514	0	spectrin, alpha, non-erythrocytic 1
Pre-frontal cortex	Streptozocin	ENSRNOT00000092445	Map2	1829	198766	161	2578	0	0.7414	0.0006333	472.747	0	microtubule-associated protein 2
Pre-frontal cortex	Streptozocin	Q9WTT6	Gda	454	50965.7	48	640	0	0.8304	0.0006333	131.596	0	Guanine deaminase, Guanase, Guanine aminase, EC 3.5.4.3 (Guanine aminohydrolase, GAH)
Pre-frontal cortex	Streptozocin	ENSRNOT00000022343	Eif5a	154	16803.4	12	217	125	0.6364	0.0006331	34.468	6	eukaryotic translation initiation factor 5A
Pre-frontal cortex	Streptozocin	ENSRNOT00000086986	Hsp90ab1	694	79953.5	75	977	0	0.6729	0.0006325	194.316	0	heat shock protein 90 alpha family class B member 1
Pre-frontal cortex	Streptozocin	ENSRNOT00000005370	Pfn1	140	14929.5	17	197	197	0.8643	0.0006322	46.264	17	profilin 1
Pre-frontal cortex	Streptozocin	ENSRNOT00000089762	NA	561	61761.7	52	789	0	0.5526	0.0006319	136.984	0	NA
Pre-frontal cortex	Streptozocin	ENSRNOT00000013354	Car2	260	29077.6	25	365	307	0.7	0.0006307	65.408	21	carbonic anhydrase 2
Pre-frontal cortex	Streptozocin	P62959	Hint1	126	13750.1	10	176	171	0.7143	0.0006276	40.177	9	histidine triad nucleotide binding protein 1
Pre-frontal cortex	Streptozocin	ENSRNOT00000092540	Map2	1738	188687	149	2418	57	0.7411	0.0006251	442.618	4	microtubule-associated protein 2
Pre-frontal cortex	Streptozocin	ENSRNOT00000018325	Gsta1	221	25285.3	17	306	181	0.6833	0.0006221	44.802	9	glutathione S-transferase alpha 1
Pre-frontal cortex	Streptozocin	ENSRNOT00000018711	Cap1	474	51538.5	36	656	626	0.6414	0.0006218	95.311	33	cyclase associated actin cytoskeleton regulatory protein 1
Pre-frontal cortex	Streptozocin	O08839-5	Bin1 Amph2 Amphl	440	49094.7	37	608	0	0.7068	0.0006208	104.463	0	Myc box-dependent-interacting protein 1 (Amphiphysin II) (Amphiphysin-like protein) (Bridging integrator 1)
Pre-frontal cortex	Streptozocin	ENSRNOT00000019443	Hsbp1	76	8561.2	8	105	105	0.8158	0.0006207	20.208	8	heat shock factor binding protein 1
Pre-frontal cortex	Streptozocin	P15146-2	Map2 Mtap2	1830	198914	156	2523	0	0.7257	0.0006194	456.901	0	Microtubule-associated protein 2, MAP-2
Pre-frontal cortex	Streptozocin	Q6P6R2	Dld	509	53986.1	43	699	699	0.7112	0.000617	128.217	43	dihydrolipoamide dehydrogenase
Pre-frontal cortex	Streptozocin	ENSRNOT00000064513	Ncald	193	22212.9	22	265	117	0.8083	0.0006169	49.738	9	neurocalcin delta
Pre-frontal cortex	Streptozocin	P37377-2	Snca	149	15727.3	15	204	0	0.4899	0.0006151	46.023	0	Alpha-synuclein
Pre-frontal cortex	Streptozocin	ENSRNOT00000006917	Atp6v1c1	382	43854.9	38	520	478	0.801	0.0006116	96.598	34	ATPase H+ transporting V1 subunit C1
Pre-frontal cortex	Streptozocin	ENSRNOT00000091046	Cplx2	134	15366.7	11	182	154	0.4851	0.0006102	27.784	7	complexin 2
Pre-frontal cortex	Streptozocin	ENSRNOT00000024601	Gstp1	210	23406.1	22	285	231	0.6429	0.0006097	61.857	17	glutathione S-transferase pi 1
Pre-frontal cortex	Streptozocin	P22062	Pcmt1	227	24607.7	23	308	307	0.8194	0.0006096	68.801	22	protein-L-isoaspartate (D-aspartate) O-methyltransferase 1
Pre-frontal cortex	Streptozocin	ENSRNOT00000057295	Vamp2	116	12664.7	8	157	101	0.3448	0.0006081	27.385	4	vesicle-associated membrane protein 2
Pre-frontal cortex	Streptozocin	P15146	Map2	1861	202270	155	2513	0	0.7088	0.0006067	455.008	0	microtubule-associated protein 2
Pre-frontal cortex	Streptozocin	O08839-3	Bin1 Amph2 Amphl	334	37336	30	450	0	0.6946	0.0006053	84.731	0	Myc box-dependent-interacting protein 1 (Amphiphysin II) (Amphiphysin-like protein) (Bridging integrator 1)
Pre-frontal cortex	Streptozocin	ENSRNOT00000046102	Vcp	806	89274.7	75	1080	1070	0.7457	0.000602	197.505	74	valosin-containing protein
Pre-frontal cortex	Streptozocin	ENSRNOT00000003965	Atp5f1b	529	56291.5	47	705	0	0.7183	0.0005988	143.893	0	ATP synthase F1 subunit beta
Pre-frontal cortex	Streptozocin	P10719	Atp5f1b	529	56300.5	47	705	0	0.7183	0.0005988	143.893	0	ATP synthase F1 subunit beta
Pre-frontal cortex	Streptozocin	ENSRNOT00000002533	Mapk1	469	50449.7	43	625	386	0	0.0005987	116.719	24	mitogen activated protein kinase 1
Pre-frontal cortex	Streptozocin	ENSRNOT00000013582	Pnp	289	32263	23	385	385	0.7232	0.0005985	61.452	23	purine nucleoside phosphorylase
Pre-frontal cortex	Streptozocin	Q78P75	Dynll2	89	10325.1	6	118	56	0.573	0.0005957	14.791	3	dynein light chain LC8-type 2
Pre-frontal cortex	Streptozocin	ENSRNOT00000019797	Pdha1l1	390	43228.7	43	517	0	0.6974	0.0005956	101.287	0	pyruvate dehydrogenase (lipoamide) alpha 1-like 1
Pre-frontal cortex	Streptozocin	ENSRNOT00000041740	LOC688932	645	70810.1	64	852	5	0.5752	0.0005935	161.584	2	similar to heat shock protein 8
Pre-frontal cortex	Streptozocin	P39069	Ak1	194	21552.2	15	255	246	0.6753	0.0005905	39.906	14	adenylate kinase 1
Pre-frontal cortex	Streptozocin	ENSRNOT00000016495	Atp6v1e1	226	26108.8	27	296	8	0.6637	0.0005884	63.745	2	ATPase H+ transporting V1 subunit E1
Pre-frontal cortex	Streptozocin	ENSRNOT00000081501	Gstm2	218	25627	25	285	0	0.6881	0.0005874	60.14	0	glutathione S-transferase mu 2
Pre-frontal cortex	Streptozocin	ENSRNOT00000071664	Rhoa	193	21750.1	23	252	80	0.7409	0.0005866	53.016	4	ras homolog family member A
Pre-frontal cortex	Streptozocin	ENSRNOT00000047139	Gstm1	218	25860.1	32	284	0	0.8073	0.0005853	70.004	0	glutathione S-transferase mu 1
Pre-frontal cortex	Streptozocin	P04905	Gstm1	218	25879.1	32	284	0	0.8073	0.0005853	70.004	0	glutathione S-transferase mu 1
Pre-frontal cortex	Streptozocin	Q9JJM9-3	Septin5 Pnutl1 Sept5	356	40944.8	30	463	0	0.6433	0.0005843	82.337	0	Septin-5 (Cell division control-related protein 1, CDCrel-1) (Peanut-like protein 1)
Pre-frontal cortex	Streptozocin	ENSRNOT00000007794	Dstn	165	18503.5	19	214	133	0.6788	0.0005827	40.028	7	destrin, actin depolymerizing factor
Pre-frontal cortex	Streptozocin	P47860	Pfkp	788	85647.4	77	1021	82	0.7513	0.0005821	216.468	7	phosphofructokinase, platelet
Pre-frontal cortex	Streptozocin	O08839-6	Bin1 Amph2 Amphl	407	45459.7	31	527	0	0.6634	0.0005817	90.914	0	Myc box-dependent-interacting protein 1 (Amphiphysin II) (Amphiphysin-like protein) (Bridging integrator 1)
Pre-frontal cortex	Streptozocin	P63170	Dynll1	89	10341.1	5	115	53	0.573	0.0005805	13.084	2	dynein light chain LC8-type 1
Pre-frontal cortex	Streptozocin	ENSRNOT00000051680	Septin5	369	42778.7	32	475	0	0.6585	0.0005783	85.703	0	septin 5
Pre-frontal cortex	Streptozocin	Q9JJM9	Septin5 Pnutl1 Sept5	369	42806.7	32	475	0	0.6585	0.0005783	85.703	0	Septin-5 (Cell division control-related protein 1, CDCrel-1) (Peanut-like protein 1)
Pre-frontal cortex	Streptozocin	ENSRNOT00000049898	Bin1	410	45786.9	31	527	0	0.6585	0.0005775	90.914	0	bridging integrator 1
Pre-frontal cortex	Streptozocin	ENSRNOT00000064916	Nedd8	81	8948.9	8	104	0	0.3457	0.0005768	18.038	0	NEDD8 ubiquitin like modifier
Pre-frontal cortex	Streptozocin	P07895	Sod2	222	24640.6	21	285	285	0.7973	0.0005768	58.762	21	superoxide dismutase 2
Pre-frontal cortex	Streptozocin	ENSRNOT00000010645	Rab3b	219	24751.1	17	281	85	0.5571	0.0005765	44.451	6	RAB3B, member RAS oncogene family
Pre-frontal cortex	Streptozocin	ENSRNOT00000084860	Rap1gds1	527	57457	52	676	18	0.7913	0.0005763	144.007	2	Rap1 GTPase-GDP dissociation stimulator 1
Pre-frontal cortex	Streptozocin	P60881	Snap25	206	23282.2	28	263	33	0.6553	0.0005736	73.597	4	synaptosome associated protein 25
Pre-frontal cortex	Streptozocin	ENSRNOT00000041168	Septin5	378	43846.3	32	482	0	0.6349	0.0005729	86.942	0	septin 5
Pre-frontal cortex	Streptozocin	Q9JJM9-2	Septin5 Pnutl1 Sept5	378	43874.4	32	482	0	0.6349	0.0005729	86.942	0	Septin-5 (Cell division control-related protein 1, CDCrel-1) (Peanut-like protein 1)
Pre-frontal cortex	Streptozocin	Q6PCU2	Atp6v1e1	226	26093.8	25	288	0	0.5354	0.0005725	59.001	0	ATPase H+ transporting V1 subunit E1
Pre-frontal cortex	Streptozocin	ENSRNOT00000012273	Dpysl5	564	61483.2	54	718	694	0.7748	0.000572	150.423	53	dihydropyrimidinase-like 5
Pre-frontal cortex	Streptozocin	ENSRNOT00000028752	Otub1	271	31232.4	29	343	343	0.7749	0.0005686	75.585	29	OTU deubiquitinase, ubiquitin aldehyde binding 1
Pre-frontal cortex	Streptozocin	Q9QYU4	Crym	313	33515.1	31	396	43	0.9042	0.0005684	82.542	2	crystallin, mu
Pre-frontal cortex	Streptozocin	P62824	Rab3c	227	25837.6	22	286	66	0.7313	0.000566	52.893	8	RAB3C, member RAS oncogene family
Pre-frontal cortex	Streptozocin	P26284	Pdha1	390	43180.6	43	491	0	0.6769	0.0005656	100.961	0	Pyruvate dehydrogenase E1 component subunit alpha, somatic form, mitochondrial, EC 1.2.4.1 (PDHE1-A type I)
Pre-frontal cortex	Streptozocin	Q8VHF5	Cs	466	51815.5	49	586	0	0.5858	0.000565	114.349	0	citrate synthase
Pre-frontal cortex	Streptozocin	ENSRNOT00000010157	Pygb	846	96695.4	83	1062	30	0.6513	0.000564	214.601	1	glycogen phosphorylase B
Pre-frontal cortex	Streptozocin	ENSRNOT00000087067	Me3	571	63377.7	39	716	0	0.6725	0.0005634	107.648	0	malic enzyme 3
Pre-frontal cortex	Streptozocin	ENSRNOT00000015609	Rab3d	219	24256.8	18	274	4	0.5479	0.0005621	40.236	2	RAB3D, member RAS oncogene family
Pre-frontal cortex	Streptozocin	O08839-4	Bin1 Amph2 Amphl	219	25203.8	16	272	0	0.5525	0.000558	47.63	0	Myc box-dependent-interacting protein 1 (Amphiphysin II) (Amphiphysin-like protein) (Bridging integrator 1)
Pre-frontal cortex	Streptozocin	ENSRNOT00000040513	Pdxp	292	31386	20	362	0	0.7911	0.000557	57.374	0	pyridoxal phosphatase
Pre-frontal cortex	Streptozocin	ENSRNOT00000047975	Ppp3ca	521	58588.3	56	645	34	0.7543	0.0005562	139.594	1	protein phosphatase 3 catalytic subunit alpha
Pre-frontal cortex	Streptozocin	ENSRNOT00000010845	Calb1	261	29957	23	323	298	0.6628	0.000556	60.2	20	calbindin 1
Pre-frontal cortex	Streptozocin	ENSRNOT00000021734	Sh3bgrl3	93	10452.3	6	115	115	0.6667	0.0005556	16.82	6	SH3 domain binding glutamate-rich protein like 3
Pre-frontal cortex	Streptozocin	ENSRNOT00000082508	Pafah1b2	229	25547.1	17	283	283	0.7249	0.0005552	47.927	17	platelet-activating factor acetylhydrolase 1b, catalytic subunit 2
Pre-frontal cortex	Streptozocin	ENSRNOT00000006329	Napb	298	33517.5	26	368	0	0.7685	0.0005548	77.415	0	NSF attachment protein beta
Pre-frontal cortex	Streptozocin	P53534	Pygb	838	96095.1	83	1033	1	0.6516	0.0005538	212.796	1	glycogen phosphorylase B
Pre-frontal cortex	Streptozocin	ENSRNOT00000021954	Cotl1	142	15904	15	175	175	0.7113	0.0005537	32.957	15	coactosin-like F-actin binding protein 1
Pre-frontal cortex	Streptozocin	Q9WVC0	Septin7	436	50457.9	42	537	0	0.578	0.0005534	107.452	0	septin 7
Pre-frontal cortex	Streptozocin	ENSRNOT00000063967	Septin7	438	50783	42	537	0	0.5753	0.0005508	107.452	0	septin 7
Pre-frontal cortex	Streptozocin	O35303-5	Dnm1l Dlp1 Drp1	744	82470.4	66	912	0	0.7849	0.0005507	180.42	0	Dynamin-1-like protein, EC 3.6.5.5 (Dynamin-like protein)
Pre-frontal cortex	Streptozocin	P85845	Fscn1	493	54438.9	43	604	166	0.7018	0.0005504	111.882	10	fascin actin-bundling protein 1
Pre-frontal cortex	Streptozocin	ENSRNOT00000001911	Gnb2	340	37289	33	416	187	0.8088	0.0005497	91.142	19	G protein subunit beta 2
Pre-frontal cortex	Streptozocin	P18484	Ap2a2 Adtab	938	103961	75	1146	0	0.6301	0.0005489	199.249	0	AP-2 complex subunit alpha-2 (100 kDa coated vesicle protein C) (Adaptor protein complex AP-2 subunit alpha-2) (Adaptor-related protein complex 2 subunit alpha-2) (Alpha-adaptin C) (Alpha2-adaptin) (Clathrin assembly protein complex 2 alpha-C large chain) (Plasma membrane adaptor HA2/AP2 adaptin alpha C subunit)
Pre-frontal cortex	Streptozocin	ENSRNOT00000002478	Dnm1l	755	83838.1	67	922	0	0.7748	0.0005487	182.559	0	dynamin 1-like
Pre-frontal cortex	Streptozocin	ENSRNOT00000085463	Skp1	163	18642.2	12	199	197	0.8221	0.0005485	31.904	11	S-phase kinase-associated protein 1
Pre-frontal cortex	Streptozocin	ENSRNOT00000008210	Sptbn1	2356	273128	203	2874	0	0.6851	0.0005481	574.565	0	spectrin, beta, non-erythrocytic 1
Pre-frontal cortex	Streptozocin	ENSRNOT00000083528	Sptbn1	2358	273289	203	2874	0	0.6845	0.0005476	574.565	0	spectrin, beta, non-erythrocytic 1
Pre-frontal cortex	Streptozocin	ENSRNOT00000008838	Septin7	384	44810.1	37	468	0	0.5703	0.0005476	93.647	0	septin 7
Pre-frontal cortex	Streptozocin	O35303-6	Dnm1l Dlp1 Drp1	718	80036.2	64	875	0	0.7813	0.0005475	171.123	0	Dynamin-1-like protein, EC 3.6.5.5 (Dynamin-like protein)
Pre-frontal cortex	Streptozocin	ENSRNOT00000064254	Ap2a2	939	104090	75	1141	19	0.6305	0.0005459	199.351	1	adaptor related protein complex 2 subunit alpha 2
Pre-frontal cortex	Streptozocin	ENSRNOT00000027497	Atp1a3	1013	111602	81	1230	670	0.5538	0.0005455	222.438	42	ATPase Na+/K+ transporting subunit alpha 3
Pre-frontal cortex	Streptozocin	Q9WU34-3	Septin3 Sept3	301	34254.7	23	365	0	0.6113	0.0005448	56.128	0	Neuronal-specific septin-3 (G-septin) (P40)
Pre-frontal cortex	Streptozocin	ENSRNOT00000075148	Tubb1	452	50365.6	40	548	67	0.354	0.0005447	76.26	9	tubulin, beta 1 class VI
Pre-frontal cortex	Streptozocin	O35303-2	Dnm1l Dlp1 Drp1	716	79883.1	64	866	0	0.7682	0.0005434	170.835	0	Dynamin-1-like protein, EC 3.6.5.5 (Dynamin-like protein)
Pre-frontal cortex	Streptozocin	ENSRNOT00000084595	Sptbn1	2357	273283	201	2849	0	0.6754	0.0005431	566.261	0	spectrin, beta, non-erythrocytic 1
Pre-frontal cortex	Streptozocin	ENSRNOT00000001589	Pdxk	312	34814.6	21	377	0	0.7147	0.0005429	59.114	0	pyridoxal kinase
Pre-frontal cortex	Streptozocin	O35331	Pdxk	312	34867.6	21	377	0	0.7147	0.0005429	59.114	0	pyridoxal kinase
Pre-frontal cortex	Streptozocin	ENSRNOT00000007374	Hpcal1	193	22306	24	233	41	0.8031	0.0005424	50.725	6	hippocalcin-like 1
Pre-frontal cortex	Streptozocin	ENSRNOT00000028687	Prdx5	213	22174.6	18	257	10	0.5822	0.0005421	47.183	1	peroxiredoxin 5
Pre-frontal cortex	Streptozocin	ENSRNOT00000084481	Rab1a	205	22645.4	22	247	0	0.7268	0.0005413	51.11	0	RAB1A, member RAS oncogene family
Pre-frontal cortex	Streptozocin	ENSRNOT00000001114	Atp6v1g2	118	13641	13	142	118	0.5339	0.0005407	34.475	9	ATPase H+ transporting V1 subunit G2
Pre-frontal cortex	Streptozocin	ENSRNOT00000010491	Septin3	345	39256.4	29	414	24	0.6435	0.0005391	73.636	3	septin 3
Pre-frontal cortex	Streptozocin	ENSRNOT00000085125	Ap2a2	938	103935	74	1125	0	0.6013	0.0005388	195.432	0	adaptor related protein complex 2 subunit alpha 2
Pre-frontal cortex	Streptozocin	O35303-4	Dnm1l Dlp1 Drp1	748	83149.8	65	896	0	0.754	0.0005382	178.698	0	Dynamin-1-like protein, EC 3.6.5.5 (Dynamin-like protein)
Pre-frontal cortex	Streptozocin	ENSRNOT00000065402	Atp6v1h	441	50774.6	38	528	0	0.6553	0.0005379	98.374	0	ATPase H+ transporting V1 subunit H
Pre-frontal cortex	Streptozocin	ENSRNOT00000087876	Dpysl3	570	61910	43	682	0	0.6439	0.0005376	124.855	0	dihydropyrimidinase-like 3
Pre-frontal cortex	Streptozocin	ENSRNOT00000040771	AC095947.1	56	6094.2	5	67	0	0.3929	0.0005375	9.585	0	Uncharacterized protein
Pre-frontal cortex	Streptozocin	P63329-2	Ppp3ca Calna	511	57559.8	55	611	0	0.7339	0.0005372	135.254	0	Protein phosphatase 3 catalytic subunit alpha, EC 3.1.3.16 (CAM-PRP catalytic subunit) (Calcineurin A alpha) (Calmodulin-dependent calcineurin A subunit alpha isoform, CNA alpha) (Serine/threonine-protein phosphatase 2B catalytic subunit alpha isoform)
Pre-frontal cortex	Streptozocin	ENSRNOT00000080232	Nedd8	87	9677.3	8	104	0	0.3218	0.0005371	18.038	0	NEDD8 ubiquitin like modifier
Pre-frontal cortex	Streptozocin	ENSRNOT00000023252	Pfkp	748	81632.6	65	889	0	0.6872	0.000534	182.163	0	phosphofructokinase, platelet
Pre-frontal cortex	Streptozocin	ENSRNOT00000023329	Me3	605	67147.7	39	716	0	0.6347	0.0005317	107.648	0	malic enzyme 3
Pre-frontal cortex	Streptozocin	ENSRNOT00000085654	Atp6v1h	483	55815.1	41	571	43	0.6542	0.0005311	106.845	3	ATPase H+ transporting V1 subunit H
Pre-frontal cortex	Streptozocin	ENSRNOT00000075602	Gmfb	108	12727.4	10	127	0	0.713	0.0005283	26.514	0	glia maturation factor, beta
Pre-frontal cortex	Streptozocin	ENSRNOT00000073905	Pdxp	308	32962.8	20	362	0	0.75	0.000528	57.374	0	pyridoxal phosphatase
Pre-frontal cortex	Streptozocin	P60881-2	Snap25 Snap	206	23303.2	28	242	23	0.6262	0.0005278	73.278	6	Synaptosomal-associated protein 25, SNAP-25 (Super protein, SUP) (Synaptosomal-associated 25 kDa protein)
Pre-frontal cortex	Streptozocin	Q8VD52	Pdxp Cin Plp Plpp Rbp1	309	33075.8	20	362	0	0.7476	0.0005263	57.374	0	Chronophin, EC 3.1.3.16, EC 3.1.3.74 (Pyridoxal phosphate phosphatase, PLP phosphatase) (Reg I-binding protein 1)
Pre-frontal cortex	Streptozocin	ENSRNOT00000002885	Sod1	154	15883.8	12	180	180	0.6494	0.0005251	34.896	12	superoxide dismutase 1
Pre-frontal cortex	Streptozocin	O35303-3	Dnm1l Dlp1 Drp1	718	80185.3	61	836	0	0.727	0.0005231	162.902	0	Dynamin-1-like protein, EC 3.6.5.5 (Dynamin-like protein)
Pre-frontal cortex	Streptozocin	ENSRNOT00000010308	Capzb	272	30591.4	22	316	0	0.6287	0.000522	56.819	0	capping actin protein of muscle Z-line subunit beta
Pre-frontal cortex	Streptozocin	P27605	Hprt1	218	24443.5	21	253	253	0.7156	0.0005214	51.523	21	hypoxanthine phosphoribosyltransferase 1
Pre-frontal cortex	Streptozocin	ENSRNOT00000031026	Blvrb	206	22062.3	14	239	239	0.8155	0.0005212	38.484	14	biliverdin reductase B
Pre-frontal cortex	Streptozocin	Q9R063	Prdx5	213	22146.6	17	247	0	0.5164	0.000521	43.657	0	peroxiredoxin 5
Pre-frontal cortex	Streptozocin	O08839-2	Bin1 Amph2 Amphl	550	60801.5	40	635	0	0.6345	0.0005187	108.98	0	Myc box-dependent-interacting protein 1 (Amphiphysin II) (Amphiphysin-like protein) (Bridging integrator 1)
Pre-frontal cortex	Streptozocin	ENSRNOT00000047450	Eef2	858	95204.9	81	990	990	0.6783	0.0005184	200.236	81	eukaryotic translation elongation factor 2
Pre-frontal cortex	Streptozocin	ENSRNOT00000038352	Pdha1	389	43067.6	43	447	0	0.6375	0.0005163	97.32	0	pyruvate dehydrogenase E1 subunit alpha 1
Pre-frontal cortex	Streptozocin	ENSRNOT00000092787	Rab14	215	23863.9	18	247	0	0.7488	0.0005161	49.657	0	RAB14, member RAS oncogene family
Pre-frontal cortex	Streptozocin	P61107	Rab14	215	23893.9	18	247	0	0.7488	0.0005161	49.657	0	RAB14, member RAS oncogene family
Pre-frontal cortex	Streptozocin	ENSRNOT00000014859	Ipo5	468	51154.2	51	537	172	0	0.0005155	133.368	16	importin 5
Pre-frontal cortex	Streptozocin	ENSRNOT00000088802	Pdha1	390	43204.6	43	447	0	0.6359	0.0005149	97.32	0	pyruvate dehydrogenase E1 subunit alpha 1
Pre-frontal cortex	Streptozocin	P85969	Napb Snapb	297	33430.4	25	339	0	0.7374	0.0005128	72.408	0	Beta-soluble NSF attachment protein, SNAP-beta (N-ethylmaleimide-sensitive factor attachment protein beta)
Pre-frontal cortex	Streptozocin	ENSRNOT00000007998	Snap25	121	13671.7	14	138	0	0.5041	0.0005124	40.239	0	Synaptosomal-associated protein
Pre-frontal cortex	Streptozocin	ENSRNOT00000002484	Eif4a2	407	46354.8	38	464	56	0.7322	0.0005122	97.48	4	eukaryotic translation initiation factor 4A2
Pre-frontal cortex	Streptozocin	ENSRNOT00000016230	Ncdn	729	78854.7	63	829	829	0.6447	0.0005109	170.544	63	neurochondrin
Pre-frontal cortex	Streptozocin	ENSRNOT00000088482	Crym	311	33386	29	353	0	0.8617	0.0005099	73.37	0	crystallin, mu
Pre-frontal cortex	Streptozocin	Q9WU34	Septin3	358	40554	27	406	0	0.6034	0.0005095	70.613	0	septin 3
Pre-frontal cortex	Streptozocin	ENSRNOT00000008999	Sh3gl2	352	39856	31	398	338	0.6165	0.000508	75.347	26	SH3 domain containing GRB2 like 2, endophilin A1
Pre-frontal cortex	Streptozocin	ENSRNOT00000022779	Actr1b	376	42236.7	26	424	0	0.5665	0.0005066	72.465	0	actin related protein 1B
Pre-frontal cortex	Streptozocin	ENSRNOT00000089866	Ap1b1	942	103740	70	1062	0	0.7059	0.0005065	181.928	0	adaptor related protein complex 1 subunit beta 1
Pre-frontal cortex	Streptozocin	ENSRNOT00000089294	Eif4a2	362	41246.1	34	408	0	0.7265	0.0005064	85.118	0	eukaryotic translation initiation factor 4A2
Pre-frontal cortex	Streptozocin	ENSRNOT00000091206	Park7	214	22470.5	15	241	0	0.4766	0.000506	45.409	0	Parkinsonism associated deglycase
Pre-frontal cortex	Streptozocin	ENSRNOT00000013785	Pgm1	562	61333.6	38	632	32	0.7491	0.0005052	102.84	4	phosphoglucomutase 1
Pre-frontal cortex	Streptozocin	ENSRNOT00000057407	Ap1b1	949	104455	70	1062	0	0.7007	0.0005028	181.928	0	adaptor related protein complex 1 subunit beta 1
Pre-frontal cortex	Streptozocin	P62986	Uba52	128	14700.9	12	143	12	0.5156	0.0005019	26.589	1	ubiquitin A-52 residue ribosomal protein fusion product 1
Pre-frontal cortex	Streptozocin	Q64548-2	Rtn1 Nsp	208	23524.6	17	232	58	0.476	0.0005011	40.995	6	Reticulon-1 (Neuroendocrine-specific protein) (S-rex)
Pre-frontal cortex	Streptozocin	ENSRNOT00000076422	Tcp1	556	60303.7	45	618	607	0.7464	0.0004994	123.062	44	t-complex 1
Pre-frontal cortex	Streptozocin	ENSRNOT00000004091	Calr	416	47947.8	29	458	458	0.625	0.0004946	80.028	29	calreticulin
Pre-frontal cortex	Streptozocin	P15146-3	Map2 Mtap2	467	49252.4	34	513	0	0.606	0.0004935	94.73	0	Microtubule-associated protein 2, MAP-2
Pre-frontal cortex	Streptozocin	ENSRNOT00000026792	Actr1a	376	42568.9	28	409	141	0.6197	0.0004887	80.137	8	actin related protein 1A
Pre-frontal cortex	Streptozocin	Q9EPC6	Pfn2	140	14974.2	12	152	152	0.6714	0.0004878	34.102	12	profilin 2
Pre-frontal cortex	Streptozocin	B3GNI6-3	Septin11 Sept11	425	48916	32	461	0	0.5906	0.0004873	80.262	0	Septin-11
Pre-frontal cortex	Streptozocin	ENSRNOT00000090026	Gls	673	73800.1	53	729	0	0.6285	0.0004867	139.096	0	glutaminase
Pre-frontal cortex	Streptozocin	O08557	Ddah1	285	31387.9	23	308	294	0.7649	0.0004855	62.469	21	dimethylarginine dimethylaminohydrolase 1
Pre-frontal cortex	Streptozocin	O08839	Bin1	588	64475.3	40	635	0	0.5935	0.0004852	108.98	0	bridging integrator 1
Pre-frontal cortex	Streptozocin	P50137	Tkt	623	67582.6	47	672	25	0.7143	0.0004846	131.191	1	transketolase
Pre-frontal cortex	Streptozocin	Q6RUV5	Rac1	192	21418.2	23	207	0	0.7604	0.0004844	52.252	0	Rac family small GTPase 1
Pre-frontal cortex	Streptozocin	ENSRNOT00000091577	Septin11	429	49292.2	32	461	0	0.5851	0.0004828	80.262	0	septin 11
Pre-frontal cortex	Streptozocin	ENSRNOT00000084682	Arpc2	300	34307.5	31	322	0	0.74	0.0004822	76.655	0	actin related protein 2/3 complex, subunit 2
Pre-frontal cortex	Streptozocin	P85970	Arpc2	300	34351.5	31	322	0	0.74	0.0004822	76.655	0	Actin-related protein 2/3 complex subunit 2 (Arp2/3 complex 34 kDa subunit, p34-ARC)
Pre-frontal cortex	Streptozocin	ENSRNOT00000079824	Actn1	887	102529	71	950	0	0.699	0.0004812	200.1	0	actinin, alpha 1
Pre-frontal cortex	Streptozocin	Q68FX0	Idh3b	385	42308.8	35	412	412	0.6519	0.0004808	91.297	35	isocitrate dehydrogenase (NAD(+)) 3 non-catalytic subunit beta
Pre-frontal cortex	Streptozocin	ENSRNOT00000042711	Rab1b	201	22145.2	19	215	0	0.7114	0.0004806	45.571	0	RAB1B, member RAS oncogene family
Pre-frontal cortex	Streptozocin	B3GNI6	Septin11	431	49645.3	32	461	0	0.5824	0.0004805	80.262	0	septin 11
Pre-frontal cortex	Streptozocin	ENSRNOT00000079993	Ahcyl1	483	53700.9	41	516	23	0.6563	0.00048	104.561	2	adenosylhomocysteinase-like 1
Pre-frontal cortex	Streptozocin	ENSRNOT00000091560	Actn1	914	105387	74	976	14	0.7101	0.0004798	208.712	2	actinin, alpha 1
Pre-frontal cortex	Streptozocin	P38652	Pgm1	562	61346.6	34	600	0	0.6993	0.0004797	94.837	0	Phosphoglucomutase-1, PGM 1, EC 5.4.2.2 (Glucose phosphomutase 1)
Pre-frontal cortex	Streptozocin	ENSRNOT00000083577	Capzb	296	33349.5	22	316	0	0.5777	0.0004796	56.819	0	capping actin protein of muscle Z-line subunit beta
Pre-frontal cortex	Streptozocin	B3GNI6-2	Septin11 Sept11	432	49732.3	32	461	0	0.581	0.0004794	80.262	0	Septin-11
Pre-frontal cortex	Streptozocin	ENSRNOT00000028636	Pygm	842	97208.7	70	893	84	0.6295	0.0004765	172.663	9	glycogen phosphorylase, muscle associated
Pre-frontal cortex	Streptozocin	ENSRNOT00000091680	Ppp1ca	330	37469.8	27	350	56	0.6697	0.0004765	69.107	8	protein phosphatase 1 catalytic subunit alpha
Pre-frontal cortex	Streptozocin	ENSRNOT00000088795	Actn1	892	102878	71	945	0	0.6895	0.000476	199.128	0	actinin, alpha 1
Pre-frontal cortex	Streptozocin	ENSRNOT00000013324	Esd	282	31325.4	17	297	297	0.727	0.0004732	48.296	17	esterase D
Pre-frontal cortex	Streptozocin	Q9Z1B2	Gstm5	225	26593.1	18	237	212	0.7111	0.0004732	41.731	16	glutathione S-transferase, mu 5
Pre-frontal cortex	Streptozocin	ENSRNOT00000017573	Bin1	589	64546.3	39	619	0	0.5756	0.0004722	106.785	0	bridging integrator 1
Pre-frontal cortex	Streptozocin	ENSRNOT00000082985	Prkar2b	416	46075.9	24	437	194	0.5264	0.000472	65.178	6	protein kinase cAMP-dependent type II regulatory subunit beta
Pre-frontal cortex	Streptozocin	P13264	Gls	674	73958.1	54	708	0	0.6291	0.0004719	140.435	0	glutaminase
Pre-frontal cortex	Streptozocin	ENSRNOT00000006190	Ppp1cb	327	37144.6	27	343	68	0.737	0.0004713	71.942	10	protein phosphatase 1 catalytic subunit beta
Pre-frontal cortex	Streptozocin	P63174	LOC685963	70	8194.7	6	73	73	0.5	0.0004685	13.542	6	similar to 60S ribosomal protein L38
Pre-frontal cortex	Streptozocin	ENSRNOT00000011937	Arpc4	168	19636.3	11	175	175	0.6071	0.000468	33.509	11	actin related protein 2/3 complex, subunit 4
Pre-frontal cortex	Streptozocin	ENSRNOT00000076692	Actr1b	342	38053.3	22	356	0	0.5673	0.0004677	61.987	0	actin related protein 1B
Pre-frontal cortex	Streptozocin	ENSRNOT00000012101	Atp6v1d	247	28273.3	19	257	251	0.5668	0.0004675	48.753	18	ATPase H+ transporting V1 subunit D
Pre-frontal cortex	Streptozocin	ENSRNOT00000023132	Prdx1	199	22077.3	17	207	0	0.7136	0.0004673	41.311	0	peroxiredoxin 1
Pre-frontal cortex	Streptozocin	ENSRNOT00000023972	Prdx1l1	199	22132.4	17	207	0	0.7136	0.0004673	41.311	0	Peroxiredoxin-1, EC 1.11.1.24
Pre-frontal cortex	Streptozocin	P62982	Rps27a	156	17921.5	14	162	13	0.5833	0.0004666	33.72	1	ribosomal protein S27a
Pre-frontal cortex	Streptozocin	ENSRNOT00000000650	Glo1	184	20788.3	19	191	183	0.6957	0.0004664	42.083	18	glyoxalase 1
Pre-frontal cortex	Streptozocin	ENSRNOT00000031115	Uba1	1058	117695	75	1098	292	0.6871	0.0004663	210.365	23	ubiquitin-like modifier activating enzyme 1
Pre-frontal cortex	Streptozocin	ENSRNOT00000078761	Ppp1cc	323	36941.7	24	335	0	0.7183	0.000466	66.719	0	protein phosphatase 1 catalytic subunit gamma
Pre-frontal cortex	Streptozocin	P21708-2	Mapk3 Erk1 Prkm3	406	45722.5	33	421	0	0.6429	0.0004659	83.334	0	Mitogen-activated protein kinase 3, MAP kinase 3, MAPK 3, EC 2.7.11.24 (ERT2) (Extracellular signal-regulated kinase 1, ERK-1) (Insulin-stimulated MAP2 kinase) (MAP kinase isoform p44, p44-MAPK) (MNK1) (Microtubule-associated protein 2 kinase) (p44-ERK1)
Pre-frontal cortex	Streptozocin	ENSRNOT00000004520	Actr3	418	47309	34	432	0	0.7177	0.0004643	91.08	0	actin related protein 3
Pre-frontal cortex	Streptozocin	P63331	Ppp2ca	309	35567.4	26	319	25	0.7638	0.0004638	74.238	3	protein phosphatase 2 catalytic subunit alpha
Pre-frontal cortex	Streptozocin	ENSRNOT00000002091	Gap43	226	23571.3	14	233	230	0.5265	0.0004632	38.381	13	growth associated protein 43
Pre-frontal cortex	Streptozocin	ENSRNOT00000084552	Actr3	419	47535.1	34	432	0	0.716	0.0004632	91.08	0	actin related protein 3
Pre-frontal cortex	Streptozocin	P62804	Hist1h4b	103	11342.4	10	106	0	0.4175	0.0004624	23.104	0	histone cluster 1 H4 family member B
Pre-frontal cortex	Streptozocin	ENSRNOT00000023779	AABR07001064.1	934	103988	76	956	28	0.5985	0.0004599	189.369	2	AP complex subunit beta
Pre-frontal cortex	Streptozocin	ENSRNOT00000043559	Hsd17b10	261	27214.5	18	267	0	0.8812	0.0004596	49.951	0	hydroxysteroid (17-beta) dehydrogenase 10
Pre-frontal cortex	Streptozocin	ENSRNOT00000074685	Dbi	87	10003.1	6	89	0	0.4598	0.0004596	13.716	0	diazepam binding inhibitor, acyl-CoA binding protein
Pre-frontal cortex	Streptozocin	O70351	Hsd17b10	261	27210.6	18	267	0	0.8812	0.0004596	49.951	0	hydroxysteroid (17-beta) dehydrogenase 10
Pre-frontal cortex	Streptozocin	ENSRNOT00000011090	AABR07071101.1	332	35825.4	25	338	13	0.3193	0.0004574	60.202	2	Gp_dh_N domain-containing protein
Pre-frontal cortex	Streptozocin	ENSRNOT00000023628	Hspa4	840	93949.1	64	855	0	0.6988	0.0004573	181.964	0	heat shock protein family A (Hsp70) member 4
Pre-frontal cortex	Streptozocin	O88600	Hspa4	840	93979.1	64	855	0	0.6988	0.0004573	181.964	0	heat shock protein family A (Hsp70) member 4
Pre-frontal cortex	Streptozocin	P10536	Rab1b	201	22131.2	18	204	0	0.6716	0.000456	43.438	0	Ras-related protein Rab-1B, EC 3.6.5.2
Pre-frontal cortex	Streptozocin	ENSRNOT00000066501	Ahcyl1	475	52843.6	38	481	0	0.5895	0.000455	94.56	0	adenosylhomocysteinase-like 1
Pre-frontal cortex	Streptozocin	ENSRNOT00000027305	Eef1g	437	50011.1	39	442	170	0.6247	0.0004544	96.247	15	eukaryotic translation elongation factor 1 gamma
Pre-frontal cortex	Streptozocin	P15146-4	Map2 Mtap2	498	52608.2	33	503	0	0.5502	0.0004538	92.837	0	Microtubule-associated protein 2, MAP-2
Pre-frontal cortex	Streptozocin	ENSRNOT00000013088	Scrn1	414	46348.6	28	418	418	0.7512	0.0004536	79.328	28	secernin 1
Pre-frontal cortex	Streptozocin	ENSRNOT00000090554	Pitpna	271	31869	23	273	15	0.6494	0.0004526	54.953	1	phosphatidylinositol transfer protein, alpha
Pre-frontal cortex	Streptozocin	ENSRNOT00000010419	Ehd3	535	60734.7	43	539	0	0.7813	0.0004526	114.355	0	EH-domain containing 3
Pre-frontal cortex	Streptozocin	Q63228	Gmfb	142	16707.5	14	143	16	0.7042	0.0004524	33.843	4	glia maturation factor, beta
Pre-frontal cortex	Streptozocin	Q9WU34-2	Septin3 Sept3	347	39579.1	24	349	0	0.5043	0.0004519	60.483	0	Neuronal-specific septin-3 (G-septin) (P40)
Pre-frontal cortex	Streptozocin	ENSRNOT00000020681	Vapa	249	27805.3	17	250	82	0.6386	0.0004511	39.406	3	VAMP associated protein A
Pre-frontal cortex	Streptozocin	P56571	Gatd3a	266	28136.8	15	267	267	0.6278	0.000451	43.698	15	glutamine amidotransferase like class 1 domain containing 3A
Pre-frontal cortex	Streptozocin	Q08877-8	Dnm3 Dyn3	564	63868.7	45	566	0	0.5585	0.0004509	106.402	0	Dynamin-3, EC 3.6.5.5 (Dynamin, testicular) (T-dynamin)
Pre-frontal cortex	Streptozocin	ENSRNOT00000006607	Actr2	394	44687.2	29	395	389	0.5812	0.0004504	72.353	28	actin related protein 2
Pre-frontal cortex	Streptozocin	ENSRNOT00000085265	Camk2b	542	60404.7	48	543	0	0.69	0.0004501	121.271	0	calcium/calmodulin-dependent protein kinase II beta
Pre-frontal cortex	Streptozocin	P08413	Camk2b	542	60345.6	48	543	0	0.69	0.0004501	121.271	0	calcium/calmodulin-dependent protein kinase II beta
Pre-frontal cortex	Streptozocin	Q9Z0W5	Pacsin1	441	50399.5	41	441	12	0.5805	0.0004493	105.579	1	protein kinase C and casein kinase substrate in neurons 1
Pre-frontal cortex	Streptozocin	ENSRNOT00000020663	Ppp2cb	309	35534.3	26	309	15	0.7638	0.0004493	73.475	3	protein phosphatase 2 catalytic subunit beta
Pre-frontal cortex	Streptozocin	ENSRNOT00000002044	Napa	295	33153.2	25	295	217	0.8237	0.0004493	72.615	17	NSF attachment protein alpha
Pre-frontal cortex	Streptozocin	ENSRNOT00000022184	Rps12	132	14487.5	8	132	36	0.5379	0.0004493	23.397	1	ribosomal protein S12
Pre-frontal cortex	Streptozocin	ENSRNOT00000074913	NA	63	6677.5	6	63	0	0.4921	0.0004493	17.68	0	NA
Pre-frontal cortex	Streptozocin	Q62952-2	Dpysl3 Crmp4	683	73834.9	43	682	0	0.5373	0.0004486	124.855	0	Dihydropyrimidinase-related protein 3, DRP-3 (Collapsin response mediator protein 4, CRMP-4) (TOAD-64/Ulip/CRMP) (TUC-4b)
Pre-frontal cortex	Streptozocin	P63088-2	Ppp1cc	337	38461.4	24	335	0	0.6884	0.0004466	66.719	0	Serine/threonine-protein phosphatase PP1-gamma catalytic subunit, PP-1G, EC 3.1.3.16 (Protein phosphatase 1C catalytic subunit)
Pre-frontal cortex	Streptozocin	ENSRNOT00000037946	Cct2	535	57404.1	37	531	531	0.7421	0.0004459	109.562	37	chaperonin containing TCP1 subunit 2
Pre-frontal cortex	Streptozocin	ENSRNOT00000075493	Fabp5	135	15031.5	9	134	90	0.5407	0.0004459	28.61	5	fatty acid binding protein 5
Pre-frontal cortex	Streptozocin	P13086	Suclg1	346	36107	15	342	0	0.4971	0.0004441	44.587	0	succinate-CoA ligase GDP/ADP-forming subunit alpha
Pre-frontal cortex	Streptozocin	ENSRNOT00000021862	Tkt	655	71095.3	46	647	0	0.6321	0.0004438	126.207	0	transketolase
Pre-frontal cortex	Streptozocin	ENSRNOT00000026539	Gng3	75	8281.2	5	74	74	0.72	0.0004433	15.619	5	G protein subunit gamma 3
Pre-frontal cortex	Streptozocin	ENSRNOT00000011874	Mapre3	281	31928	25	277	224	0.6263	0.0004429	61.238	21	microtubule-associated protein, RP/EB family, member 3
Pre-frontal cortex	Streptozocin	P62747	Rhob	196	22091.1	19	193	127	0.6684	0.0004424	46.242	9	ras homolog family member B
Pre-frontal cortex	Streptozocin	Q9Z0V6	Prdx3	257	28259.5	18	253	0	0.642	0.0004423	50.892	0	peroxiredoxin 3
Pre-frontal cortex	Streptozocin	Q63028-2	Add1	631	69687.1	50	621	0	0.6957	0.0004422	135.548	0	Alpha-adducin (Erythrocyte adducin subunit alpha)
Pre-frontal cortex	Streptozocin	P31596-2	Slc1a2 Eaat2 Glt1	570	61788.6	33	560	0	0.3509	0.0004414	93.425	0	Excitatory amino acid transporter 2 (GLT-1) (Sodium-dependent glutamate/aspartate transporter 2, GLUT-R) (Solute carrier family 1 member 2)
Pre-frontal cortex	Streptozocin	Q62951	Dpysl4	564	61029.1	47	554	0	0.8493	0.0004413	127.528	0	dihydropyrimidinase-like 4
Pre-frontal cortex	Streptozocin	ENSRNOT00000018763	Psat1	386	41331.2	30	379	176	0	0.0004411	73.863	13	phosphoserine aminotransferase 1
Pre-frontal cortex	Streptozocin	ENSRNOT00000087625	Mapk3	429	47879.5	33	421	0	0	0.0004409	83.334	0	mitogen activated protein kinase 3
Pre-frontal cortex	Streptozocin	ENSRNOT00000000141	Phf24	363	41171.2	25	355	355	0.6281	0.0004394	60.85	25	PHD finger protein 24
Pre-frontal cortex	Streptozocin	P31596	Slc1a2	573	62047.7	33	560	0	0.349	0.0004391	93.425	0	solute carrier family 1 member 2
Pre-frontal cortex	Streptozocin	ENSRNOT00000049785	LOC100365043	125	13877.6	14	122	0	0.416	0.0004385	32.682	0	histone cluster 1, H2bd-like
Pre-frontal cortex	Streptozocin	Q00715	Hist1h2bg	125	13963.6	14	122	0	0.416	0.0004385	32.682	0	histone cluster 1, H2bg
Pre-frontal cortex	Streptozocin	ENSRNOT00000017254	Rhoc	193	22004.3	19	188	0	0.6788	0.0004376	43.759	0	ras homolog family member C
Pre-frontal cortex	Streptozocin	ENSRNOT00000090820	Pacsin1	441	50325.5	40	429	0	0.5601	0.0004371	103.346	0	protein kinase C and casein kinase substrate in neurons 1
Pre-frontal cortex	Streptozocin	ENSRNOT00000001227	Cct6a	531	57962.7	35	516	400	0.597	0.0004366	89.718	23	chaperonin containing TCP1 subunit 6A
Pre-frontal cortex	Streptozocin	P03994-2	Hapln1 Crtl1	284	32569.3	20	276	0	0.6197	0.0004366	50.807	0	Hyaluronan and proteoglycan link protein 1 (Cartilage-linking protein 1, Cartilage-link protein) (Proteoglycan link protein)
Pre-frontal cortex	Streptozocin	ENSRNOT00000093116	Psma4	160	18073	7	155	0	0.6062	0.0004352	22.472	0	proteasome 20S subunit alpha 4
Pre-frontal cortex	Streptozocin	ENSRNOT00000042287	Bin1	572	62979.6	34	554	0	0.5385	0.0004351	95.432	0	bridging integrator 1
Pre-frontal cortex	Streptozocin	ENSRNOT00000029587	Dpysl4	572	61922.5	47	554	0	0.8374	0.0004351	127.528	0	dihydropyrimidinase-like 4
Pre-frontal cortex	Streptozocin	ENSRNOT00000028779	Hist1h2bq	126	13879.5	14	122	0	0.4127	0.000435	32.682	0	histone cluster 1 H2B family member Q
Pre-frontal cortex	Streptozocin	ENSRNOT00000006947	Mapt	374	39101	30	361	0	0.5775	0.0004337	82.993	0	microtubule-associated protein tau
Pre-frontal cortex	Streptozocin	ENSRNOT00000025916	Hnrnpk	463	50926.4	29	447	0	0.5896	0.0004337	78.218	0	heterogeneous nuclear ribonucleoprotein K
Pre-frontal cortex	Streptozocin	P19332-3	Mapt Mtapt Tau	403	42004.2	30	389	0	0.6079	0.0004337	85.076	0	Microtubule-associated protein tau (Neurofibrillary tangle protein) (Paired helical filament-tau, PHF-tau)
Pre-frontal cortex	Streptozocin	ENSRNOT00000090451	Capza2	286	32928.6	22	276	227	0.6993	0.0004336	74.639	19	capping actin protein of muscle Z-line subunit alpha 2
Pre-frontal cortex	Streptozocin	P62890	Rpl30	115	12757.7	9	111	68	0.5826	0.0004336	22.155	6	ribosomal protein L30
Pre-frontal cortex	Streptozocin	ENSRNOT00000089305	Actn4	911	104886	66	879	0	0.6476	0.0004335	189.672	0	actinin alpha 4
Pre-frontal cortex	Streptozocin	ENSRNOT00000027773	Actn4	911	104831	66	879	0	0.6476	0.0004335	189.672	0	actinin alpha 4
Pre-frontal cortex	Streptozocin	ENSRNOT00000024901	Gad2	585	65341.6	47	564	547	0.6359	0.0004331	121.41	44	glutamate decarboxylase 2
Pre-frontal cortex	Streptozocin	ENSRNOT00000025980	Hnrnpk	464	50978.4	29	447	0	0.5884	0.0004328	78.218	0	heterogeneous nuclear ribonucleoprotein K
Pre-frontal cortex	Streptozocin	ENSRNOT00000078582	Prps1	318	34793.9	22	306	4	0.7075	0.0004323	57.056	1	phosphoribosyl pyrophosphate synthetase 1
Pre-frontal cortex	Streptozocin	ENSRNOT00000090402	Actn4	911	104832	66	873	20	0.6652	0.0004305	190.276	2	actinin alpha 4
Pre-frontal cortex	Streptozocin	ENSRNOT00000021310	Ap2s1	142	16988.7	11	136	135	0.4437	0.0004303	22.831	10	adaptor related protein complex 2 subunit sigma 1
Pre-frontal cortex	Streptozocin	ENSRNOT00000015886	Cct5	541	59480.8	41	518	466	0.6285	0.0004302	111.628	39	chaperonin containing TCP1 subunit 5
Pre-frontal cortex	Streptozocin	ENSRNOT00000025994	Gstm4	218	25518.9	19	208	69	0.6284	0.0004287	43.381	5	glutathione S-transferase mu 4
Pre-frontal cortex	Streptozocin	P19332-7	Mapt Mtapt Tau	372	38759.5	27	355	0	0.5806	0.0004287	78.728	0	Microtubule-associated protein tau (Neurofibrillary tangle protein) (Paired helical filament-tau, PHF-tau)
Pre-frontal cortex	Streptozocin	ENSRNOT00000089874	Ube2n	152	17094.9	14	145	133	0.7171	0.0004286	33.228	13	ubiquitin-conjugating enzyme E2N
Pre-frontal cortex	Streptozocin	ENSRNOT00000024012	Wdr1	606	66121.9	41	578	578	0.7426	0.0004285	121.732	41	WD repeat domain 1
Pre-frontal cortex	Streptozocin	ENSRNOT00000092546	Septin6	432	49360.2	31	412	0	0.5741	0.0004285	75.722	0	septin 6
Pre-frontal cortex	Streptozocin	ENSRNOT00000076367	Gsto1	213	24909.6	15	203	0	0.6808	0.0004282	34.527	0	glutathione S-transferase omega 1
Pre-frontal cortex	Streptozocin	ENSRNOT00000043196	Hapln1	354	40218.1	27	337	61	0.6469	0.0004277	67.087	7	hyaluronan and proteoglycan link protein 1
Pre-frontal cortex	Streptozocin	ENSRNOT00000005368	Pitpna	271	31813	22	258	0	0.6162	0.0004277	53.076	0	phosphatidylinositol transfer protein, alpha
Pre-frontal cortex	Streptozocin	ENSRNOT00000007624	Suclg1	360	37517.6	15	342	0	0.4778	0.0004268	44.587	0	succinate-CoA ligase GDP/ADP-forming subunit alpha
Pre-frontal cortex	Streptozocin	ENSRNOT00000083110	LOC314140	318	34765.9	21	302	0	0.6855	0.0004267	55.591	0	ribose-phosphate pyrophosphokinase I -like
Pre-frontal cortex	Streptozocin	ENSRNOT00000003696	Pafah1b1	410	46622.1	35	389	33	0.8073	0.0004263	85.133	2	platelet-activating factor acetylhydrolase 1b, regulatory subunit 1
Pre-frontal cortex	Streptozocin	P02401	Rplp2	115	11666.8	9	109	109	0.887	0.0004258	24.213	9	ribosomal protein lateral stalk subunit P2
Pre-frontal cortex	Streptozocin	ENSRNOT00000065742	Cap2	477	52861.1	35	452	422	0.652	0.0004257	93.38	32	cyclase associated actin cytoskeleton regulatory protein 2
Pre-frontal cortex	Streptozocin	ENSRNOT00000079139	Hist1h2bg	113	12511.8	12	107	0	0.3186	0.0004254	29.543	0	histone cluster 1, H2bg
Pre-frontal cortex	Streptozocin	P11598	Pdia3	505	56569.7	43	478	0	0.6614	0.0004253	103.654	0	protein disulfide isomerase family A, member 3
Pre-frontal cortex	Streptozocin	P09812	Pygm	842	97193.8	60	797	1	0.5226	0.0004253	148.41	1	Glycogen phosphorylase, muscle form, EC 2.4.1.1 (Myophosphorylase)
Pre-frontal cortex	Streptozocin	ENSRNOT00000007604	Slc1a2	260	28065.4	18	246	4	0.3923	0.0004251	47.107	1	solute carrier family 1 member 2
Pre-frontal cortex	Streptozocin	ENSRNOT00000071425	Rab10	200	22508.6	19	189	25	0.68	0.0004246	38.599	3	RAB10, member RAS oncogene family
Pre-frontal cortex	Streptozocin	ENSRNOT00000064180	Aprt	180	19515.4	11	170	170	0.6278	0.0004243	28.894	11	adenine phosphoribosyl transferase
Pre-frontal cortex	Streptozocin	ENSRNOT00000091004	Gnai1	354	40301.2	27	334	129	0.6102	0.0004239	67.746	10	G protein subunit alpha i1
Pre-frontal cortex	Streptozocin	P05712	Rab2a	212	23502.7	16	200	109	0.5896	0.0004238	44.851	8	RAB2A, member RAS oncogene family
Pre-frontal cortex	Streptozocin	ENSRNOT00000065195	Sucla2	465	50256.1	32	437	418	0.7011	0.0004222	83.137	30	succinate-CoA ligase ADP-forming subunit beta
Pre-frontal cortex	Streptozocin	ENSRNOT00000020478	Pdia3	510	57025	43	478	0	0.6549	0.0004211	103.654	0	protein disulfide isomerase family A, member 3
Pre-frontal cortex	Streptozocin	ENSRNOT00000016432	Rab7a	207	23470.8	20	194	12	0.7536	0.0004211	49.203	2	RAB7A, member RAS oncogene family
Pre-frontal cortex	Streptozocin	ENSRNOT00000023567	Tpm3	248	28970.7	18	232	50	0.379	0.0004203	45.502	4	tropomyosin 3
Pre-frontal cortex	Streptozocin	O08838	Amph	683	74814	42	638	7	0.6559	0.0004197	111.404	1	amphiphysin
Pre-frontal cortex	Streptozocin	P20651	Ppp3cb	525	59057.5	42	490	48	0.7067	0.0004193	102.243	3	protein phosphatase 3 catalytic subunit beta
Pre-frontal cortex	Streptozocin	ENSRNOT00000084702	Amph	678	74183.6	41	631	0	0.6608	0.0004181	110.278	0	amphiphysin
Pre-frontal cortex	Streptozocin	ENSRNOT00000001383	Tpt1	172	19431.5	12	160	160	0.7151	0.0004179	39.06	12	tumor protein, translationally-controlled 1
Pre-frontal cortex	Streptozocin	ENSRNOT00000017102	Amph	612	66539.7	37	568	0	0.6797	0.000417	99.31	0	amphiphysin
Pre-frontal cortex	Streptozocin	ENSRNOT00000018340	Add1	678	74720.5	50	629	20	0.6593	0.0004168	137.369	1	adducin 1
Pre-frontal cortex	Streptozocin	ENSRNOT00000024548	Hspa12a	675	74765.5	56	625	585	0.677	0.000416	143.994	50	heat shock protein family A (Hsp70) member 12A
Pre-frontal cortex	Streptozocin	P47858	Pfkm	780	85487.7	57	722	585	0.6526	0.0004159	150.934	45	phosphofructokinase, muscle
Pre-frontal cortex	Streptozocin	ENSRNOT00000080800	Amph	614	66867.8	37	568	0	0.6775	0.0004156	99.31	0	Amphiphysin
Pre-frontal cortex	Streptozocin	ENSRNOT00000008274	Lgalsl	172	18925.6	8	159	159	0.5698	0.0004153	22.753	8	galectin-like
Pre-frontal cortex	Streptozocin	Q5XI78	Ogdh	1023	116203	77	945	772	0.6725	0.000415	201.5	61	oxoglutarate dehydrogenase
Pre-frontal cortex	Streptozocin	ENSRNOT00000014124	Tmod2	351	39449.6	21	324	309	0.6638	0.0004147	56.311	19	tropomodulin 2
Pre-frontal cortex	Streptozocin	P85834	Tufm	452	49473	39	417	415	0.6858	0.0004145	96.782	38	Tu translation elongation factor, mitochondrial
Pre-frontal cortex	Streptozocin	P47819-3	Gfap	409	47378.3	40	377	0	0.6919	0.0004141	90.574	0	Glial fibrillary acidic protein, GFAP
Pre-frontal cortex	Streptozocin	Q9Z339	Gsto1	241	27633	17	222	1	0.6929	0.0004139	38.941	1	Glutathione S-transferase omega-1, GSTO-1, EC 2.5.1.18 (Glutathione S-transferase omega 1-1, GSTO 1-1) (Glutathione-dependent dehydroascorbate reductase, EC 1.8.5.1) (Monomethylarsonic acid reductase, MMA(V) reductase, EC 1.20.4.2) (S-(Phenacyl)glutathione reductase, SPG-R)
Pre-frontal cortex	Streptozocin	ENSRNOT00000082236	Ppp3cb	480	54420.1	39	442	0	0.6896	0.0004137	93.355	0	protein phosphatase 3 catalytic subunit beta
Pre-frontal cortex	Streptozocin	ENSRNOT00000092301	Septin6	448	50034.6	31	412	0	0	0.0004132	75.722	0	septin 6
Pre-frontal cortex	Streptozocin	ENSRNOT00000061047	Pcp4	62	6785.3	5	57	0	0.4355	0.000413	15.412	0	Purkinje cell protein 4
Pre-frontal cortex	Streptozocin	P52303-2	Ap1b1 Adtb1	942	103789	65	865	0	0.5955	0.0004126	159.696	0	AP-1 complex subunit beta-1 (Adaptor protein complex AP-1 subunit beta-1) (Adaptor-related protein complex 1 subunit beta-1) (Beta-1-adaptin) (Beta-adaptin 1) (Clathrin assembly protein complex 1 beta large chain) (Golgi adaptor HA1/AP1 adaptin beta subunit)
Pre-frontal cortex	Streptozocin	ENSRNOT00000016851	Gsto1	241	27647	16	221	0	0.6598	0.000412	37.072	0	glutathione S-transferase omega 1
Pre-frontal cortex	Streptozocin	Q63610-2	Tpm3 Tpm-5 Tpm5	248	28684.7	19	227	0	0.504	0.0004112	48.279	0	Tropomyosin alpha-3 chain (Gamma-tropomyosin) (Tropomyosin-3) (Tropomyosin-5)
Pre-frontal cortex	Streptozocin	ENSRNOT00000019405	Arpc5l	153	16981.8	11	140	59	0.5817	0.0004111	31.428	5	actin related protein 2/3 complex, subunit 5-like
Pre-frontal cortex	Streptozocin	Q63092	Camkv	504	54054	29	461	36	0.4881	0.0004109	80.279	1	CaM kinase-like vesicle-associated
Pre-frontal cortex	Streptozocin	Q99PD4	Arpc1a	370	41554.7	34	338	293	0.7459	0.0004104	86.894	31	actin related protein 2/3 complex, subunit 1A
Pre-frontal cortex	Streptozocin	P15999	Atp5f1a	553	59698.6	45	505	1	0.5859	0.0004103	121.113	1	ATP synthase F1 subunit alpha
Pre-frontal cortex	Streptozocin	ENSRNOT00000020304	Ap2a1	977	107589	66	892	671	0.6325	0.0004102	170.54	47	adaptor related protein complex 2 subunit alpha 1
Pre-frontal cortex	Streptozocin	ENSRNOT00000022892	Atp5f1a	553	59757.7	44	504	0	0.5606	0.0004095	119.098	0	ATP synthase F1 subunit alpha
Pre-frontal cortex	Streptozocin	P52303	Ap1b1 Adtb1	949	104504	65	865	0	0.5911	0.0004095	159.696	0	AP-1 complex subunit beta-1 (Adaptor protein complex AP-1 subunit beta-1) (Adaptor-related protein complex 1 subunit beta-1) (Beta-1-adaptin) (Beta-adaptin 1) (Clathrin assembly protein complex 1 beta large chain) (Golgi adaptor HA1/AP1 adaptin beta subunit)
Pre-frontal cortex	Streptozocin	ENSRNOT00000084773	Ehd3	572	64859.7	42	520	0	0.722	0.0004084	112.273	0	EH-domain containing 3
Pre-frontal cortex	Streptozocin	ENSRNOT00000076860	Tnr	689	77293.4	46	625	0	0.627	0.0004075	128.636	0	tenascin R
Pre-frontal cortex	Streptozocin	ENSRNOT00000089409	NA	118	13108	12	107	0	0.3051	0.0004074	29.543	0	NA
Pre-frontal cortex	Streptozocin	P30835	Pfkl	780	85266.4	57	707	527	0.559	0.0004072	161.316	39	phosphofructokinase, liver type
Pre-frontal cortex	Streptozocin	ENSRNOT00000023935	Rps3	243	26639.4	22	220	176	0.7078	0.0004068	48.975	17	ribosomal protein S3
Pre-frontal cortex	Streptozocin	ENSRNOT00000080581	Snap25	167	18748.1	16	151	0	0.4192	0.0004062	44.096	0	Synaptosomal-associated protein
Pre-frontal cortex	Streptozocin	P07483	Fabp3	133	14747.6	10	120	111	0.4737	0.0004054	21.17	8	fatty acid binding protein 3
Pre-frontal cortex	Streptozocin	ENSRNOT00000049182	NA	102	11027.1	8	92	0	0.3431	0.0004052	19.682	0	NA
Pre-frontal cortex	Streptozocin	ENSRNOT00000083181	Ube2d3	140	15834.8	6	126	0	0.4214	0.0004043	18.529	0	ubiquitin-conjugating enzyme E2D 3
Pre-frontal cortex	Streptozocin	ENSRNOT00000076052	Stmn1	149	17259.9	12	134	97	0.4899	0.000404	26.68	8	stathmin 1
Pre-frontal cortex	Streptozocin	ENSRNOT00000023072	Akr1a1	325	36464.9	23	292	272	0.5969	0.0004037	63.452	21	aldo-keto reductase family 1 member A1
Pre-frontal cortex	Streptozocin	ENSRNOT00000055238	Atp6v0a1	832	95504.8	56	746	0	0.4808	0.0004028	142.132	0	ATPase H+ transporting V0 subunit a1
Pre-frontal cortex	Streptozocin	P47819-2	Gfap	421	48734.2	40	377	0	0.6722	0.0004023	90.574	0	Glial fibrillary acidic protein, GFAP
Pre-frontal cortex	Streptozocin	ENSRNOT00000078073	Gls	602	65778	42	538	0	0.5399	0.0004015	109.303	0	glutaminase
Pre-frontal cortex	Streptozocin	ENSRNOT00000004385	Qdpr	241	25517.9	13	215	215	0.5975	0.0004008	43.343	13	quinoid dihydropteridine reductase
Pre-frontal cortex	Streptozocin	Q64559-1	Acot7 Bach	338	37519.2	25	301	0	0.5178	0.0004001	62.692	0	Cytosolic acyl coenzyme A thioester hydrolase, EC 3.1.2.2 (ACH1) (ACT) (Acyl-CoA thioesterase 7) (Brain acyl-CoA hydrolase, BACH) (CTE-IIa) (CTE-IIb, CTE-II) (LACH1) (Long chain acyl-CoA thioester hydrolase) (MTE-II)
Pre-frontal cortex	Streptozocin	ENSRNOT00000087076	Atp6v0a1	838	96175.1	56	746	0	0.4773	0.0004	142.132	0	ATPase H+ transporting V0 subunit a1
Pre-frontal cortex	Streptozocin	ENSRNOT00000086847	Fscn1	492	53829.6	33	438	0	0.5061	0.0004	85.13	0	Fascin
Pre-frontal cortex	Streptozocin	ENSRNOT00000092711	Pafah1b1	400	45660.7	33	356	0	0.75	0.0003999	77.751	0	platelet-activating factor acetylhydrolase 1b, regulatory subunit 1
Pre-frontal cortex	Streptozocin	ENSRNOT00000000025	Hebp1	190	21092.4	13	169	169	0.7474	0.0003996	35.371	13	heme binding protein 1
Pre-frontal cortex	Streptozocin	Q5PPJ9	Sh3glb2	404	44806.8	25	359	0	0.5347	0.0003992	65.335	0	SH3 domain-containing GRB2-like endophilin B2
Pre-frontal cortex	Streptozocin	ENSRNOT00000001201	Hsph1	858	96339.4	60	761	735	0.6142	0.0003985	161.843	56	heat shock protein family H (Hsp110) member 1
Pre-frontal cortex	Streptozocin	P19332-5	Mapt Mtapt Tau	432	45076.7	31	383	0	0.625	0.0003983	87.385	0	Microtubule-associated protein tau (Neurofibrillary tangle protein) (Paired helical filament-tau, PHF-tau)
Pre-frontal cortex	Streptozocin	ENSRNOT00000027818	Pin1	165	18303	10	146	146	0.6	0.0003975	28.933	10	peptidylprolyl cis/trans isomerase, NIMA-interacting 1
Pre-frontal cortex	Streptozocin	ENSRNOT00000091176	Hist1h2bo	138	15465.4	14	122	0	0.3768	0.0003972	32.682	0	histone cluster 1 H2B family member o
Pre-frontal cortex	Streptozocin	ENSRNOT00000086309	Hist1h2bo	138	15451.4	14	122	0	0.3768	0.0003972	32.682	0	histone cluster 1 H2B family member o
Pre-frontal cortex	Streptozocin	ENSRNOT00000079464	Hras	189	21266.5	12	167	38	0.7407	0.000397	37.126	3	HRas proto-oncogene, GTPase
Pre-frontal cortex	Streptozocin	ENSRNOT00000077624	Rab7a	206	23078.7	18	182	0	0.6796	0.0003969	44.156	0	RAB7A, member RAS oncogene family
Pre-frontal cortex	Streptozocin	Q9QZR6-4	Septin9 Sept9	333	38481.8	20	294	0	0.4565	0.0003967	48.61	0	Septin-9 (Eighth septin) (Eseptin) (Septin-like protein, SLP)
Pre-frontal cortex	Streptozocin	Q63610-3	Tpm3 Tpm-5 Tpm5	247	28673.8	20	218	14	0.4494	0.0003965	47.593	2	Tropomyosin alpha-3 chain (Gamma-tropomyosin) (Tropomyosin-3) (Tropomyosin-5)
Pre-frontal cortex	Streptozocin	Q4KM73	Cmpk1	196	22137.2	13	172	0	0.551	0.0003943	32.551	0	cytidine/uridine monophosphate kinase 1
Pre-frontal cortex	Streptozocin	ENSRNOT00000034401	Gfap	430	49908.6	40	377	0	0.6581	0.0003939	90.574	0	glial fibrillary acidic protein
Pre-frontal cortex	Streptozocin	P11915-2	Scp2 Scp-2	143	15269.9	13	125	0	0.7552	0.0003927	31.079	0	Sterol carrier protein 2, SCP-2 (Acetyl-CoA C-myristoyltransferase, EC 2.3.1.155) (Non-specific lipid-transfer protein, NSL-TP) (Propanoyl-CoA C-acyltransferase, EC 2.3.1.176) (SCP-2/3-oxoacyl-CoA thiolase) (SCP-2/thiolase, EC 2.3.1.16) (SCP-chi) (Sterol carrier protein X, SCP-X)
Pre-frontal cortex	Streptozocin	ENSRNOT00000092396	Cct3	349	39353.3	25	305	0	0.5989	0.0003926	65.285	0	chaperonin containing TCP1 subunit 3
Pre-frontal cortex	Streptozocin	ENSRNOT00000040430	Atp1a1	1023	112964	73	893	367	0.4888	0.0003922	184.361	36	ATPase Na+/K+ transporting subunit alpha 1
Pre-frontal cortex	Streptozocin	Q568Z9	Phyhip	330	37512.5	23	288	221	0.6242	0.0003921	56.144	19	phytanoyl-CoA 2-hydroxylase interacting protein
Pre-frontal cortex	Streptozocin	ENSRNOT00000084232	Rack1	317	35036.5	22	276	22	0.7539	0.0003912	59.693	4	receptor for activated C kinase 1
Pre-frontal cortex	Streptozocin	ENSRNOT00000025756	Pura	289	31866	19	251	30	0.5156	0.0003902	49.775	3	purine rich element binding protein A
Pre-frontal cortex	Streptozocin	ENSRNOT00000018073	Add1	735	80271.3	52	638	0	0.6136	0.00039	139.611	0	adducin 1
Pre-frontal cortex	Streptozocin	Q63028	Add1	735	80287.3	52	638	0	0.6136	0.00039	139.611	0	adducin 1
Pre-frontal cortex	Streptozocin	ENSRNOT00000039633	NA	315	36491.5	25	273	1	0.4603	0.0003894	56.862	1	NA
Pre-frontal cortex	Streptozocin	Q5U206	Calml3	149	16773.8	16	129	30	0.4497	0.000389	28.851	5	calmodulin-like 3
Pre-frontal cortex	Streptozocin	ENSRNOT00000081819	Idh3g	393	42805.2	25	340	9	0.6412	0.0003887	71.054	1	isocitrate dehydrogenase (NAD(+)) 3 non-catalytic subunit gamma
Pre-frontal cortex	Streptozocin	ENSRNOT00000002169	Cct8	548	59532.5	44	474	474	0.6934	0.0003886	112.398	44	chaperonin containing TCP1 subunit 8
Pre-frontal cortex	Streptozocin	ENSRNOT00000000674	Ppa1	289	32732.1	18	250	33	0.7197	0.0003886	49.971	3	inorganic pyrophosphatase 1
Pre-frontal cortex	Streptozocin	ENSRNOT00000092483	Mapt	330	34234	24	285	0	0.497	0.000388	61.313	0	microtubule-associated protein tau
Pre-frontal cortex	Streptozocin	ENSRNOT00000088288	Sptbn2	2388	270831	165	2062	26	0.6683	0.0003879	464.035	1	spectrin, beta, non-erythrocytic 2
Pre-frontal cortex	Streptozocin	P23565	Ina Inexa	505	56063.6	38	436	27	0.6812	0.0003879	96.279	2	Alpha-internexin, Alpha-Inx
Pre-frontal cortex	Streptozocin	ENSRNOT00000001717	Vps29	182	20437.6	13	157	20	0.5934	0.0003876	31.831	1	VPS29 retromer complex component
Pre-frontal cortex	Streptozocin	ENSRNOT00000005347	Grb2	217	25172.4	16	187	33	0.7005	0.0003872	37.301	2	growth factor receptor bound protein 2
Pre-frontal cortex	Streptozocin	ENSRNOT00000080894	Mcts1	181	20523.8	11	156	0	0.6354	0.0003872	26.507	0	MCTS1, re-initiation and release factor
Pre-frontal cortex	Streptozocin	ENSRNOT00000082686	Psma7	248	27820.6	18	213	0	0.625	0.0003859	47.773	0	proteasome 20S subunit alpha 7
Pre-frontal cortex	Streptozocin	ENSRNOT00000020581	Dnajc5	198	22068.3	10	170	32	0.5404	0.0003857	28.948	1	DnaJ heat shock protein family (Hsp40) member C5
Pre-frontal cortex	Streptozocin	ENSRNOT00000077011	Gsto1	127	14819.4	8	109	0	0.5591	0.0003856	20.572	0	glutathione S-transferase omega 1
Pre-frontal cortex	Streptozocin	P13264-2	Gls	603	65936.1	43	517	0	0.5406	0.0003852	110.642	0	Glutaminase kidney isoform, mitochondrial, GLS, EC 3.5.1.2 (K-glutaminase) (L-glutamine amidohydrolase) [Cleaved into: Glutaminase kidney isoform, mitochondrial 68 kDa chain; Glutaminase kidney isoform, mitochondrial 65 kDa chain ]
Pre-frontal cortex	Streptozocin	ENSRNOT00000066204	Ube2d3	147	16658.4	6	126	0	0.4014	0.0003851	18.529	0	ubiquitin-conjugating enzyme E2D 3
Pre-frontal cortex	Streptozocin	ENSRNOT00000066677	Mcts1	182	20518.8	11	156	0	0.6319	0.0003851	26.507	0	MCTS1, re-initiation and release factor
Pre-frontal cortex	Streptozocin	P62839	Ube2d2	147	16706.4	6	126	0	0.4014	0.0003851	18.529	0	ubiquitin-conjugating enzyme E2D 2
Pre-frontal cortex	Streptozocin	P14604	Echs1	290	31478.2	15	248	248	0.5034	0.0003842	40.791	15	enoyl-CoA hydratase, short chain 1
Pre-frontal cortex	Streptozocin	Q9QWN8	Sptbn2 Spnb3	2388	270879	164	2036	0	0.6558	0.0003831	459.229	0	Spectrin beta chain, non-erythrocytic 2 (Beta SpIII sigma 1) (Beta-III spectrin) (Glutamate transporter EAAT4-associated protein 41) (SPNB-3) (Spectrin-like protein GTRAP41)
Pre-frontal cortex	Streptozocin	ENSRNOT00000026496	Coro1a	461	51015	30	393	388	0.5727	0.000383	76.872	29	coronin 1A
Pre-frontal cortex	Streptozocin	ENSRNOT00000024310	Ahcy	432	47489.2	31	368	355	0.6713	0.0003827	83.115	29	adenosylhomocysteinase
Pre-frontal cortex	Streptozocin	ENSRNOT00000016372	Glrx	107	11853.2	8	91	37	0.6916	0.0003821	21.717	2	glutaredoxin
Pre-frontal cortex	Streptozocin	B2GV06	Oxct1	520	56150.1	34	442	429	0.6077	0.0003819	89.768	33	3-oxoacid CoA transferase 1
Pre-frontal cortex	Streptozocin	ENSRNOT00000018864	Efhd2	239	26724.5	17	203	134	0.6736	0.0003816	41.4	12	EF-hand domain family, member D2
Pre-frontal cortex	Streptozocin	ENSRNOT00000077285	Arpc2	179	20235	16	152	0	0.6201	0.0003815	41.681	0	actin related protein 2/3 complex, subunit 2
Pre-frontal cortex	Streptozocin	ENSRNOT00000041717	Prkaca	351	40562	20	298	32	0.4729	0.0003814	52.525	2	protein kinase cAMP-activated catalytic subunit alpha
Pre-frontal cortex	Streptozocin	Q6DGG0	Ppid	370	40721.7	25	314	306	0.6892	0.0003813	60.95	24	peptidylprolyl isomerase D
Pre-frontal cortex	Streptozocin	ENSRNOT00000011158	Nipsnap1	284	33307	21	241	241	0.5986	0.0003813	56.988	21	nipsnap homolog 1
Pre-frontal cortex	Streptozocin	ENSRNOT00000045127	Mapt	343	35856.3	26	291	0	0.5802	0.0003812	72.184	0	microtubule-associated protein tau
Pre-frontal cortex	Streptozocin	ENSRNOT00000055194	Dusp3	211	23082.4	10	179	0	0.564	0.0003811	33.998	0	dual specificity phosphatase 3
Pre-frontal cortex	Streptozocin	ENSRNOT00000084217	Dusp3	211	23043.3	10	179	0	0.564	0.0003811	33.998	0	dual specificity phosphatase 3
Pre-frontal cortex	Streptozocin	ENSRNOT00000021030	Cct7	544	59602.2	39	461	202	0.6636	0.0003807	90.526	12	chaperonin containing TCP1 subunit 7
Pre-frontal cortex	Streptozocin	ENSRNOT00000001593	Cstb	98	11170.6	7	83	83	0.5408	0.0003805	17.401	7	cystatin B
Pre-frontal cortex	Streptozocin	ENSRNOT00000018173	Psma4	261	29461.2	13	221	66	0.6513	0.0003804	36.56	6	proteasome 20S subunit alpha 4
Pre-frontal cortex	Streptozocin	ENSRNOT00000027780	Rps27a-ps28	150	17105.9	10	127	0	0.3933	0.0003804	26.944	0	ribosomal protein S27a, pseudogene 28
Pre-frontal cortex	Streptozocin	ENSRNOT00000023606	Atp6v0d1	351	40257.2	24	297	293	0.5442	0.0003802	58.8	22	ATPase H+ transporting V0 subunit D1
Pre-frontal cortex	Streptozocin	ENSRNOT00000009666	Psma6	246	27363.8	17	208	0	0.6382	0.0003799	47.113	0	proteasome 20S subunit alpha 6
Pre-frontal cortex	Streptozocin	ENSRNOT00000090239	Camkv	504	54070	28	425	0	0.4306	0.0003789	75.672	0	CaM kinase-like vesicle-associated
Pre-frontal cortex	Streptozocin	Q63560	Map6	952	100405	66	802	0	0.7017	0.0003785	148.477	0	microtubule-associated protein 6
Pre-frontal cortex	Streptozocin	P41565	Idh3g	393	42806.2	24	331	0	0.6056	0.0003784	68.965	0	Isocitrate dehydrogenase [NAD] subunit gamma 1, mitochondrial (Isocitric dehydrogenase subunit gamma) (NAD(+)-specific ICDH subunit gamma)
Pre-frontal cortex	Streptozocin	ENSRNOT00000036860	RGD1560402	395	41916.7	26	332	2	0.4203	0.0003776	64.563	2	similar to Phosphoglycerate kinase 1
Pre-frontal cortex	Streptozocin	P62083	Rps7	194	22095.2	9	163	147	0.4742	0.0003775	24.078	6	ribosomal protein S7
Pre-frontal cortex	Streptozocin	P19332-6	Mapt Mtapt Tau	374	39110	28	314	0	0.5775	0.0003772	75.344	0	Microtubule-associated protein tau (Neurofibrillary tangle protein) (Paired helical filament-tau, PHF-tau)
Pre-frontal cortex	Streptozocin	D3ZQL7	Tppp	218	23514.1	13	183	183	0.4725	0.0003771	36.473	13	tubulin polymerization promoting protein
Pre-frontal cortex	Streptozocin	ENSRNOT00000031045	Npepps	920	103261	62	772	772	0.5891	0.000377	165.002	62	aminopeptidase puromycin sensitive
Pre-frontal cortex	Streptozocin	ENSRNOT00000028838	Itpa	198	21895.1	14	166	166	0.7121	0.0003767	39.075	14	inosine triphosphatase
Pre-frontal cortex	Streptozocin	Q05764-2	Add2	562	62730.3	35	471	0	0.7082	0.0003765	102.847	0	Beta-adducin (Adducin-63) (Erythrocyte adducin subunit beta)
Pre-frontal cortex	Streptozocin	Q6P502	Cct3	545	60590.3	42	455	145	0.6661	0.0003751	105.336	16	chaperonin containing TCP1 subunit 3
Pre-frontal cortex	Streptozocin	P14408-2	Fh Fh1	467	50120.7	27	389	0	0.5824	0.0003742	87.119	0	Fumarate hydratase, mitochondrial, Fumarase, EC 4.2.1.2
Pre-frontal cortex	Streptozocin	ENSRNOT00000085042	Sh3glb2	400	44402.7	25	332	3	0.53	0.0003729	63.962	1	SH3 domain-containing GRB2-like endophilin B2
Pre-frontal cortex	Streptozocin	Q62910-2	Synj1	1308	144415	82	1085	0	0.6231	0.0003727	213.722	0	Synaptojanin-1, EC 3.1.3.36 (Synaptic inositol 1,4,5-trisphosphate 5-phosphatase 1)
Pre-frontal cortex	Streptozocin	ENSRNOT00000085355	Rhoc	210	23875	17	174	0	0.5857	0.0003723	40.176	0	ras homolog family member C
Pre-frontal cortex	Streptozocin	ENSRNOT00000081607	Camk2b	589	64976.1	46	488	0	0.5552	0.0003722	112.819	0	calcium/calmodulin-dependent protein kinase II beta
Pre-frontal cortex	Streptozocin	ENSRNOT00000052033	Synj1	1311	144671	82	1085	0	0.6217	0.0003718	213.722	0	synaptojanin 1
Pre-frontal cortex	Streptozocin	ENSRNOT00000086046	Dnajc5	167	18722.8	9	138	0	0.4371	0.0003713	24.666	0	DnaJ heat shock protein family (Hsp40) member C5
Pre-frontal cortex	Streptozocin	ENSRNOT00000064851	Nckap1	1028	117067	72	848	27	0.607	0.0003706	187.377	1	NCK-associated protein 1
Pre-frontal cortex	Streptozocin	ENSRNOT00000073950	Dync1h1	4644	531694	303	3824	0	0.6367	0.0003699	807.631	0	dynein cytoplasmic 1 heavy chain 1
Pre-frontal cortex	Streptozocin	ENSRNOT00000027417	Ina	506	56205.7	37	416	7	0.6739	0.0003694	91.768	1	internexin neuronal intermediate filament protein, alpha
Pre-frontal cortex	Streptozocin	ENSRNOT00000015946	Psma1	263	29480.8	16	216	216	0.7148	0.000369	44.266	16	proteasome 20S subunit alpha 1
Pre-frontal cortex	Streptozocin	P04692-5	Tpm1 Alpha-tm Tpma	245	28308.5	17	201	0	0.4204	0.0003686	42.305	0	Tropomyosin alpha-1 chain (Alpha-tropomyosin) (Tropomyosin-1)
Pre-frontal cortex	Streptozocin	P12346-2	Tf	496	54470.8	38	406	0	0.5948	0.0003678	100.411	0	Serotransferrin, Transferrin (Beta-1 metal-binding globulin) (Liver regeneration-related protein LRRG03) (Siderophilin)
Pre-frontal cortex	Streptozocin	Q62910-5	Synj1	1292	142794	80	1057	0	0.6192	0.0003676	208.394	0	Synaptojanin-1, EC 3.1.3.36 (Synaptic inositol 1,4,5-trisphosphate 5-phosphatase 1)
Pre-frontal cortex	Streptozocin	ENSRNOT00000093732	NA	148	16112.2	11	121	0	0.3243	0.0003673	26.229	0	NA
Pre-frontal cortex	Streptozocin	ENSRNOT00000080663	Arl8b	186	21507.1	12	152	24	0.5215	0.0003671	31.976	3	ADP-ribosylation factor like GTPase 8B
Pre-frontal cortex	Streptozocin	ENSRNOT00000031384	Aldh5a1	523	56091.9	37	427	39	0.6252	0.0003668	98.171	2	aldehyde dehydrogenase 5 family, member A1
Pre-frontal cortex	Streptozocin	Q08877-9	Dnm3 Dyn3	848	95517.6	59	692	0	0.5283	0.0003666	136.214	0	Dynamin-3, EC 3.6.5.5 (Dynamin, testicular) (T-dynamin)
Pre-frontal cortex	Streptozocin	ENSRNOT00000067162	Camk2b	666	72764.2	48	543	0	0.5616	0.0003663	121.271	0	calcium/calmodulin-dependent protein kinase II beta
Pre-frontal cortex	Streptozocin	P35281	Rab10	200	22825.8	15	163	0	0.47	0.0003662	31.325	0	Ras-related protein Rab-10, EC 3.6.5.2
Pre-frontal cortex	Streptozocin	ENSRNOT00000075628	Vat1l	378	41558.1	29	308	308	0.7196	0.0003661	66.142	29	vesicle amine transport 1-like
Pre-frontal cortex	Streptozocin	ENSRNOT00000068739	Prkacb	351	40664	21	286	27	0.5214	0.0003661	55.475	2	protein kinase cAMP-activated catalytic subunit beta
Pre-frontal cortex	Streptozocin	Q08877-11	Dnm3 Dyn3	852	95920.8	59	692	0	0.5258	0.0003649	136.214	0	Dynamin-3, EC 3.6.5.5 (Dynamin, testicular) (T-dynamin)
Pre-frontal cortex	Streptozocin	P01835	Kacb	106	11575.5	7	86	0	0.7358	0.0003645	22.268	0	Ig kappa chain C region, B allele
Pre-frontal cortex	Streptozocin	ENSRNOT00000045628	Tf	698	76327.6	51	566	0	0.6132	0.0003643	133.621	0	transferrin
Pre-frontal cortex	Streptozocin	ENSRNOT00000092558	Rac1	211	23403.2	19	171	0	0.6161	0.0003641	43.179	0	Rac family small GTPase 1
Pre-frontal cortex	Streptozocin	ENSRNOT00000049048	Eif4a1	406	46106.5	33	329	62	0.6502	0.0003641	75.357	5	eukaryotic translation initiation factor 4A1
Pre-frontal cortex	Streptozocin	ENSRNOT00000000079	Acot7	372	40924	25	301	0	0.4704	0.0003635	62.692	0	acyl-CoA thioesterase 7
Pre-frontal cortex	Streptozocin	ENSRNOT00000021400	Cndp2	475	52641.6	31	384	384	0.8063	0.0003632	84.657	31	carnosine dipeptidase 2
Pre-frontal cortex	Streptozocin	P56574	Idh2	452	50916.9	34	365	50	0.5996	0.0003628	78.07	4	isocitrate dehydrogenase (NADP(+)) 2
Pre-frontal cortex	Streptozocin	Q08877-13	Dnm3 Dyn3	857	96488	59	692	0	0.5228	0.0003628	136.214	0	Dynamin-3, EC 3.6.5.5 (Dynamin, testicular) (T-dynamin)
Pre-frontal cortex	Streptozocin	ENSRNOT00000010720	Cand1	1230	136257	75	992	973	0.6138	0.0003623	185.251	71	cullin-associated and neddylation-dissociated 1
Pre-frontal cortex	Streptozocin	ENSRNOT00000001247	Ran	216	24389.6	14	174	82	0.4722	0.0003619	33.976	4	RAN, member RAS oncogene family
Pre-frontal cortex	Streptozocin	Q08877-7	Dnm3 Dyn3	859	96771.4	59	692	0	0.5215	0.0003619	136.214	0	Dynamin-3, EC 3.6.5.5 (Dynamin, testicular) (T-dynamin)
Pre-frontal cortex	Streptozocin	A7VJC2-4	Hnrnpa2b1 Hnrnp Hnrpa2b1	313	33920.3	27	252	0	0.6422	0.0003617	68.136	0	Heterogeneous nuclear ribonucleoproteins A2/B1, hnRNP A2/B1
Pre-frontal cortex	Streptozocin	ENSRNOT00000057929	Ctbp1	403	43801.5	25	324	0	0.5831	0.0003612	72.011	0	C-terminal binding protein 1
Pre-frontal cortex	Streptozocin	ENSRNOT00000011499	Arpc3	178	20504.3	12	143	143	0.4663	0.0003609	26.714	12	actin related protein 2/3 complex, subunit 3
Pre-frontal cortex	Streptozocin	ENSRNOT00000022550	Gnai2	355	40455	25	285	33	0.6254	0.0003607	65.219	4	G protein subunit alpha i2
Pre-frontal cortex	Streptozocin	ENSRNOT00000050903	AABR07040565.1	76	8285	4	61	0	0.2632	0.0003606	12.938	0	Gp_dh_C domain-containing protein
Pre-frontal cortex	Streptozocin	ENSRNOT00000009377	Dync1h1	4643	531454	297	3726	0	0.627	0.0003605	789.26	0	dynein cytoplasmic 1 heavy chain 1
Pre-frontal cortex	Streptozocin	Q08877-10	Dnm3 Dyn3	863	97174.5	59	692	0	0.5191	0.0003603	136.214	0	Dynamin-3, EC 3.6.5.5 (Dynamin, testicular) (T-dynamin)
Pre-frontal cortex	Streptozocin	A1L108-2	Arpc5l	101	11210.1	6	81	0	0.505	0.0003603	15.843	0	Actin-related protein 2/3 complex subunit 5-like protein (Arp2/3 complex 16 kDa subunit 2, ARC16-2)
Pre-frontal cortex	Streptozocin	ENSRNOT00000030031	Rab35	201	22992.8	12	161	84	0.5274	0.0003599	30.554	8	RAB35, member RAS oncogene family
Pre-frontal cortex	Streptozocin	ENSRNOT00000014962	Ank2	749	80397.1	45	600	0	0.6288	0.0003599	135.819	0	ankyrin 2
Pre-frontal cortex	Streptozocin	ENSRNOT00000089829	Rack1	296	32699.5	16	237	0	0.6047	0.0003597	47.845	0	receptor for activated C kinase 1
Pre-frontal cortex	Streptozocin	ENSRNOT00000081280	Cyfip2	967	111937	68	774	215	0.5977	0.0003596	158.757	18	cytoplasmic FMR1 interacting protein 2
Pre-frontal cortex	Streptozocin	Q05764	Add2	725	80524.2	43	580	104	0.6883	0.0003594	126.652	7	adducin 2
Pre-frontal cortex	Streptozocin	ENSRNOT00000034740	Eef1b2	225	24642.3	13	180	130	0.6089	0.0003594	39.15	8	eukaryotic translation elongation factor 1 beta 2
Pre-frontal cortex	Streptozocin	ENSRNOT00000012376	Kpnb1	876	97104	49	700	114	0.5696	0.000359	132.583	5	karyopherin subunit beta 1
Pre-frontal cortex	Streptozocin	ENSRNOT00000001518	Rplp0	317	34175.8	19	253	189	0.7634	0.0003586	58.323	15	ribosomal protein lateral stalk subunit P0
Pre-frontal cortex	Streptozocin	ENSRNOT00000084062	Psma6	227	25283.9	15	181	0	0.6079	0.0003582	42.252	0	proteasome 20S subunit alpha 6
Pre-frontal cortex	Streptozocin	Q08877-12	Dnm3 Dyn3	868	97741.7	59	692	0	0.5161	0.0003582	136.214	0	Dynamin-3, EC 3.6.5.5 (Dynamin, testicular) (T-dynamin)
Pre-frontal cortex	Streptozocin	A7VJC2-3	Hnrnpa2b1 Hnrnp Hnrpa2b1	301	32497.4	26	240	0	0.6379	0.0003582	65.819	0	Heterogeneous nuclear ribonucleoproteins A2/B1, hnRNP A2/B1
Pre-frontal cortex	Streptozocin	ENSRNOT00000026928	Psma5	241	26376.2	14	192	20	0.5768	0.0003579	42.301	1	proteasome 20S subunit alpha 5
Pre-frontal cortex	Streptozocin	ENSRNOT00000011508	Atp6v1g1	118	13684	9	94	94	0.5763	0.0003579	24.404	9	ATPase H+ transporting V1 subunit G1
Pre-frontal cortex	Streptozocin	ENSRNOT00000008164	Arl8a	186	21358	12	148	13	0.5323	0.0003575	32.427	2	ADP-ribosylation factor like GTPase 8A
Pre-frontal cortex	Streptozocin	ENSRNOT00000073834	Psma2	234	25892.3	11	186	186	0.5684	0.0003571	35.597	11	proteasome 20S subunit alpha 2
Pre-frontal cortex	Streptozocin	Q08877-2	Dnm3 Dyn3	858	96581.2	58	682	0	0.5117	0.0003571	134.423	0	Dynamin-3, EC 3.6.5.5 (Dynamin, testicular) (T-dynamin)
Pre-frontal cortex	Streptozocin	ENSRNOT00000050236	Eloc	112	12447	6	89	89	0.6518	0.000357	15.469	6	elongin C
Pre-frontal cortex	Streptozocin	ENSRNOT00000034389	Map6	952	100359	64	756	0	0.6849	0.0003568	141.709	0	microtubule-associated protein 6
Pre-frontal cortex	Streptozocin	ENSRNOT00000084756	Ank2	1919	210440	108	1520	0	0.6399	0.0003559	324.348	0	ankyrin 2
Pre-frontal cortex	Streptozocin	ENSRNOT00000058143	Atp1a2	1020	112128	70	808	264	0.502	0.0003559	175.148	33	ATPase Na+/K+ transporting subunit alpha 2
Pre-frontal cortex	Streptozocin	Q08877-4	Dnm3 Dyn3	862	96984.4	58	682	0	0.5093	0.0003555	134.423	0	Dynamin-3, EC 3.6.5.5 (Dynamin, testicular) (T-dynamin)
Pre-frontal cortex	Streptozocin	P62703	Rps4x	263	29561	22	208	207	0.5209	0.0003553	45.416	21	ribosomal protein S4, X-linked
Pre-frontal cortex	Streptozocin	ENSRNOT00000014213	Acot7	381	42689.9	25	301	0	0.4593	0.0003549	62.692	0	acyl-CoA thioesterase 7
Pre-frontal cortex	Streptozocin	ENSRNOT00000039572	Nras	189	21211.5	10	149	12	0.582	0.0003542	31.311	1	NRAS proto-oncogene, GTPase
Pre-frontal cortex	Streptozocin	ENSRNOT00000080637	Ank2	1932	211757	108	1520	0	0.6356	0.0003535	324.348	0	ankyrin 2
Pre-frontal cortex	Streptozocin	Q08877-6	Dnm3 Dyn3	867	97551.5	58	682	0	0.5063	0.0003534	134.423	0	Dynamin-3, EC 3.6.5.5 (Dynamin, testicular) (T-dynamin)
Pre-frontal cortex	Streptozocin	ENSRNOT00000073886	Rac3	192	21490.1	17	151	5	0.6354	0.0003533	38.064	2	Rac family small GTPase 3
Pre-frontal cortex	Streptozocin	P48004-2	Psma7	248	27748.6	17	195	0	0.5685	0.0003533	44.45	0	Proteasome subunit alpha type-7 (Proteasome subunit RC6-1)
Pre-frontal cortex	Streptozocin	P38650	Dync1h1	4644	531898	291	3651	0	0.6113	0.0003532	776.482	0	dynein cytoplasmic 1 heavy chain 1
Pre-frontal cortex	Streptozocin	ENSRNOT00000023806	Pcbp1	355	37356.9	22	279	229	0.7437	0.0003531	63.044	16	poly(rC) binding protein 1
Pre-frontal cortex	Streptozocin	ENSRNOT00000067653	Dnm3	869	97834.9	58	682	0	0.5052	0.0003526	134.423	0	dynamin 3
Pre-frontal cortex	Streptozocin	ENSRNOT00000079719	Prkar2b	310	34691.4	18	243	0	0.5065	0.0003522	47.244	0	protein kinase cAMP-dependent type II regulatory subunit beta
Pre-frontal cortex	Streptozocin	P25286-2	Atp6v0a1 Atp6n1 Vpp1	832	95576.8	53	652	0	0.4471	0.0003521	131.95	0	V-type proton ATPase 116 kDa subunit a 1, V-ATPase 116 kDa subunit a 1 (Clathrin-coated vesicle/synaptic vesicle proton pump 116 kDa subunit) (Vacuolar adenosine triphosphatase subunit Ac116) (Vacuolar proton pump subunit 1) (Vacuolar proton translocating ATPase 116 kDa subunit a isoform 1)
Pre-frontal cortex	Streptozocin	ENSRNOT00000036228	AABR07013086.1	175	19062.7	20	137	1	0.3429	0.0003517	38.151	1	Gp_dh_C domain-containing protein
Pre-frontal cortex	Streptozocin	Q9QX69	Lancl1	399	45192.5	26	312	305	0.6291	0.0003513	73.463	25	LanC like 1
Pre-frontal cortex	Streptozocin	ENSRNOT00000012879	Akr1b1	316	35756.3	24	247	237	0.6614	0.0003512	54.721	23	aldo-keto reductase family 1 member B
Pre-frontal cortex	Streptozocin	Q08877-3	Dnm3 Dyn3	873	98238.1	58	682	0	0.5029	0.000351	134.423	0	Dynamin-3, EC 3.6.5.5 (Dynamin, testicular) (T-dynamin)
Pre-frontal cortex	Streptozocin	ENSRNOT00000083951	Rpl10	214	24569.9	14	167	167	0.4813	0.0003506	32.174	14	ribosomal protein L10
Pre-frontal cortex	Streptozocin	P25286	Atp6v0a1	838	96247.1	53	652	0	0.4439	0.0003496	131.95	0	ATPase H+ transporting V0 subunit a1
Pre-frontal cortex	Streptozocin	P85971	Pgls	257	27199.3	11	200	0	0.7626	0.0003496	34.067	0	6-phosphogluconolactonase, 6PGL, EC 3.1.1.31
Pre-frontal cortex	Streptozocin	ENSRNOT00000079694	Ube2d3	162	18322	6	126	0	0.3642	0.0003494	18.529	0	ubiquitin-conjugating enzyme E2D 3
Pre-frontal cortex	Streptozocin	Q08877-5	Dnm3 Dyn3	878	98805.3	58	682	0	0.5	0.000349	134.423	0	Dynamin-3, EC 3.6.5.5 (Dynamin, testicular) (T-dynamin)
Pre-frontal cortex	Streptozocin	P47727	Cbr1	277	30540.9	19	215	157	0.7112	0.0003487	48.153	15	carbonyl reductase 1
Pre-frontal cortex	Streptozocin	P27791-2	Prkaca	343	39835.5	18	266	0	0.4344	0.0003484	44.766	0	cAMP-dependent protein kinase catalytic subunit alpha, PKA C-alpha, EC 2.7.11.11
Pre-frontal cortex	Streptozocin	ENSRNOT00000026040	Ola1	396	44489.2	28	307	299	0.7247	0.0003483	74.339	27	Obg-like ATPase 1
Pre-frontal cortex	Streptozocin	ENSRNOT00000014704	Slc25a4	298	32865.2	29	231	0	0.6208	0.0003483	61.053	0	solute carrier family 25 member 4
Pre-frontal cortex	Streptozocin	Q05962	Slc25a4	298	32950.2	29	231	0	0.6208	0.0003483	61.053	0	solute carrier family 25 member 4
Pre-frontal cortex	Streptozocin	ENSRNOT00000046085	Atl1	558	63317.3	38	432	416	0.6541	0.0003478	98.474	36	atlastin GTPase 1
Pre-frontal cortex	Streptozocin	P55161	Nckap1	1128	128763	77	873	54	0.5957	0.0003477	194.472	7	NCK-associated protein 1
Pre-frontal cortex	Streptozocin	ENSRNOT00000025421	Rpl18a	176	20700.9	13	136	136	0.517	0.0003472	25.377	13	ribosomal protein L18A
Pre-frontal cortex	Streptozocin	ENSRNOT00000012847	Cct4	539	58044.8	33	416	356	0.6605	0.0003468	88.605	31	chaperonin containing TCP1 subunit 4
Pre-frontal cortex	Streptozocin	ENSRNOT00000087094	Rac1	217	24161.6	18	167	0	0.5484	0.0003458	40.671	0	Rac family small GTPase 1
Pre-frontal cortex	Streptozocin	ENSRNOT00000043082	Aak1	963	103778	43	741	19	0.6646	0.0003457	138.145	3	AP2 associated kinase 1
Pre-frontal cortex	Streptozocin	ENSRNOT00000011208	Tagln2	199	22361.1	13	153	106	0.7035	0.0003454	34.113	10	transgelin 2
Pre-frontal cortex	Streptozocin	ENSRNOT00000028743	Stip1	543	62512.4	42	417	417	0.5249	0.000345	99.621	42	stress-induced phosphoprotein 1
Pre-frontal cortex	Streptozocin	P14408	Fh Fh1	507	54412	27	389	0	0.5365	0.0003447	87.119	0	Fumarate hydratase, mitochondrial, Fumarase, EC 4.2.1.2
Pre-frontal cortex	Streptozocin	P19332-4	Mapt Mtapt Tau	498	51862.2	30	382	0	0.5422	0.0003446	86.237	0	Microtubule-associated protein tau (Neurofibrillary tangle protein) (Paired helical filament-tau, PHF-tau)
Pre-frontal cortex	Streptozocin	P08644-2	Kras Kras2	188	21462.9	10	144	14	0.6649	0.0003441	30.79	1	GTPase KRas, EC 3.6.5.2 (K-Ras 2) (Ki-Ras) (c-K-ras) (c-Ki-ras) [Cleaved into: GTPase KRas, N-terminally processed ]
Pre-frontal cortex	Streptozocin	Q5HZV9	Ppp1r7	360	41253.4	20	275	275	0.6222	0.0003432	60.679	20	protein phosphatase 1, regulatory subunit 7
Pre-frontal cortex	Streptozocin	ENSRNOT00000004176	Rogdi	287	32166.7	15	219	219	0.6341	0.0003428	40.694	15	rogdi atypical leucine zipper
Pre-frontal cortex	Streptozocin	Q9QZR6-3	Septin9 Sept9	404	46234.6	22	308	0	0.4579	0.0003425	52.734	0	Septin-9 (Eighth septin) (Eseptin) (Septin-like protein, SLP)
Pre-frontal cortex	Streptozocin	P24049	Rpl17	184	21365.4	10	140	15	0.4185	0.0003418	23.296	2	ribosomal protein L17
Pre-frontal cortex	Streptozocin	P62250	Rps16	146	16417	11	111	111	0.5205	0.0003416	22.182	11	ribosomal protein S16
Pre-frontal cortex	Streptozocin	P62907	Rpl10a	217	24797.5	12	165	0	0.4424	0.0003416	32.229	0	ribosomal protein L10A
Pre-frontal cortex	Streptozocin	ENSRNOT00000064153	Sirt2	350	39275.8	25	266	0	0.6086	0.0003414	70.385	0	sirtuin 2
Pre-frontal cortex	Streptozocin	ENSRNOT00000006804	Crip2	208	22663	13	158	158	0.5529	0.0003413	35.462	13	cysteine-rich protein 2
Pre-frontal cortex	Streptozocin	ENSRNOT00000008120	Dctn2	402	44102.7	19	305	0	0.5871	0.0003409	60.658	0	dynactin subunit 2
Pre-frontal cortex	Streptozocin	P62994-2	Grb2 Ash	203	23522.7	14	154	0	0.6059	0.0003408	30.691	0	Growth factor receptor-bound protein 2 (Adapter protein GRB2) (Protein Ash) (SH2/SH3 adapter GRB2)
Pre-frontal cortex	Streptozocin	ENSRNOT00000002037	Psmb1	240	26372.3	20	182	50	0.7208	0.0003407	43.977	2	proteasome 20S subunit beta 1
Pre-frontal cortex	Streptozocin	P63159	Hmgb1	215	24860.2	17	163	64	0.4279	0.0003406	42.601	8	high mobility group box 1
Pre-frontal cortex	Streptozocin	P27791	Prkaca	351	40576	18	266	0	0.4245	0.0003405	44.766	0	cAMP-dependent protein kinase catalytic subunit alpha, PKA C-alpha, EC 2.7.11.11
Pre-frontal cortex	Streptozocin	ENSRNOT00000020693	Ykt6	198	22337.3	14	150	150	0.7172	0.0003404	32.263	14	YKT6 v-SNARE homolog
Pre-frontal cortex	Streptozocin	ENSRNOT00000010318	Cmpk1	227	25798.3	13	172	0	0.4758	0.0003404	32.551	0	cytidine/uridine monophosphate kinase 1
Pre-frontal cortex	Streptozocin	ENSRNOT00000072538	Ipo5	483	53697.1	35	365	0	0	0.0003395	88.94	0	importin 5
Pre-frontal cortex	Streptozocin	P51650-2	Aldh5a1 Ssadh	495	52746.1	32	374	0	0.5717	0.0003395	85.229	0	Succinate-semialdehyde dehydrogenase, mitochondrial, SSADH, EC 1.2.1.24 (Aldehyde dehydrogenase family 5 member A1) (NAD(+)-dependent succinic semialdehyde dehydrogenase)
Pre-frontal cortex	Streptozocin	ENSRNOT00000023651	Cltb	229	25084.1	15	173	53	0.3712	0.0003394	29.561	1	clathrin, light chain B
Pre-frontal cortex	Streptozocin	ENSRNOT00000059496	Cyfip2	593	68616.2	38	448	0	0.5683	0.0003394	95.56	0	cytoplasmic FMR1 interacting protein 2
Pre-frontal cortex	Streptozocin	Q9Z2F5	Ctbp1	430	46580.9	25	324	0	0.5465	0.0003385	72.011	0	C-terminal binding protein 1
Pre-frontal cortex	Streptozocin	ENSRNOT00000015618	Psmb2	201	22879.7	17	151	151	0.6617	0.0003375	39.359	17	proteasome 20S subunit beta 2
Pre-frontal cortex	Streptozocin	ENSRNOT00000041876	Actr3b	289	32841.9	23	217	147	0.5744	0.0003373	51.816	14	actin related protein 3B
Pre-frontal cortex	Streptozocin	P0C1X8	Aak1	962	103678	40	722	0	0.6216	0.0003372	130.611	0	AP2-associated protein kinase 1, EC 2.7.11.1 (Adaptor-associated kinase 1)
Pre-frontal cortex	Streptozocin	P17764	Acat1	424	44648.4	26	318	318	0.5755	0.000337	72.704	26	acetyl-CoA acetyltransferase 1
Pre-frontal cortex	Streptozocin	ENSRNOT00000002656	AABR07066818.1 Rps2-ps6	267	28553.2	21	200	0	0.5655	0.0003365	47.791	0	40S ribosomal protein S2
Pre-frontal cortex	Streptozocin	ENSRNOT00000013461	Rpl4	421	47253.1	22	315	0	0.4442	0.0003362	61.189	0	ribosomal protein L4
Pre-frontal cortex	Streptozocin	P50878	Rpl4	421	47209	22	315	0	0.4442	0.0003362	61.189	0	ribosomal protein L4
Pre-frontal cortex	Streptozocin	ENSRNOT00000071701	LOC100363537	221	25322.8	12	165	0	0.4344	0.0003354	32.229	0	ribosomal protein L10a-like
Pre-frontal cortex	Streptozocin	ENSRNOT00000011991	Csrp1	193	20581.7	9	144	144	0.5181	0.0003352	27.696	9	cysteine and glycine-rich protein 1
Pre-frontal cortex	Streptozocin	Q9WVB1	Rab6a	208	23556.9	14	155	8	0.5817	0.0003348	29.95	1	RAB6A, member RAS oncogene family
Pre-frontal cortex	Streptozocin	ENSRNOT00000084913	NA	231	24760	18	172	0	0.5065	0.0003345	42.068	0	NA
Pre-frontal cortex	Streptozocin	P51650	Aldh5a1 Ssadh	523	56077.8	36	389	0	0.5908	0.0003342	92.005	0	Succinate-semialdehyde dehydrogenase, mitochondrial, SSADH, EC 1.2.1.24 (Aldehyde dehydrogenase family 5 member A1) (NAD(+)-dependent succinic semialdehyde dehydrogenase)
Pre-frontal cortex	Streptozocin	ENSRNOT00000025608	Nutf2	127	14451	7	94	94	0.5118	0.0003325	19.766	7	nuclear transport factor 2
Pre-frontal cortex	Streptozocin	ENSRNOT00000002358	Psmd2	908	100106	50	671	671	0.6894	0.000332	123.704	50	proteasome 26S subunit ubiquitin receptor, non-ATPase 2
Pre-frontal cortex	Streptozocin	ENSRNOT00000048125	Myl12b	172	19748.5	13	127	0	0.5698	0.0003317	36.221	0	myosin light chain 12B
Pre-frontal cortex	Streptozocin	P18666	Myl12b	172	19807.6	13	127	0	0.5698	0.0003317	36.221	0	myosin light chain 12B
Pre-frontal cortex	Streptozocin	ENSRNOT00000085988	Idh2	427	48032.3	30	315	0	0.5667	0.0003314	65.683	0	isocitrate dehydrogenase (NADP(+)) 2
Pre-frontal cortex	Streptozocin	P62870	Elob	118	13143.6	9	87	87	0.5339	0.0003312	20.491	9	elongin B
Pre-frontal cortex	Streptozocin	A7VJC2	Hnrnpa2b1	353	37436.7	28	260	0	0.6487	0.0003309	72.24	0	heterogeneous nuclear ribonucleoprotein A2/B1
Pre-frontal cortex	Streptozocin	B2RZ78-2	Vps29	186	20858.9	12	137	0	0.5753	0.0003309	28.377	0	Vacuolar protein sorting-associated protein 29 (Vesicle protein sorting 29)
Pre-frontal cortex	Streptozocin	ENSRNOT00000029125	Mgll	303	33460.2	18	223	20	0.703	0.0003307	49.96	3	monoglyceride lipase
Pre-frontal cortex	Streptozocin	ENSRNOT00000089074	Myl6	151	16932.1	13	111	10	0.6821	0.0003303	31.752	1	myosin light chain 6
Pre-frontal cortex	Streptozocin	P60841-2	Ensa	117	12895.5	7	86	0	0.6154	0.0003302	16.244	0	Alpha-endosulfine (ARPP-19e)
Pre-frontal cortex	Streptozocin	ENSRNOT00000065393	Ctbp1	441	47710.5	25	324	0	0.5329	0.0003301	72.011	0	C-terminal binding protein 1
Pre-frontal cortex	Streptozocin	P17077	Rpl9	192	21861.8	10	141	127	0.6458	0.0003299	30.021	9	ribosomal protein L9
Pre-frontal cortex	Streptozocin	ENSRNOT00000026696	Hspa9	679	73680.7	40	498	0	0.5022	0.0003295	112.873	0	heat shock protein family A (Hsp70) member 9
Pre-frontal cortex	Streptozocin	P48721	Hspa9 Grp75 Hspa9a	679	73793.8	40	498	0	0.5022	0.0003295	112.873	0	Stress-70 protein, mitochondrial (75 kDa glucose-regulated protein, GRP-75) (Heat shock 70 kDa protein 9) (Mortalin) (Peptide-binding protein 74, PBP74) (mtHSP70)
Pre-frontal cortex	Streptozocin	Q63560-2	Map6 Mtap6	660	70561.4	30	484	0	0.6364	0.0003295	76.548	0	Microtubule-associated protein 6, MAP-6 (145-kDa STOP, STOP145) (Stable tubule-only polypeptide, STOP)
Pre-frontal cortex	Streptozocin	ENSRNOT00000025067	Hspa5	654	72284.4	34	479	0	0.4847	0.0003291	90.818	0	heat shock protein family A (Hsp70) member 5
Pre-frontal cortex	Streptozocin	ENSRNOT00000080410	Bcat1	399	44723.4	27	292	0	0.6165	0.0003288	71.733	0	branched chain amino acid transaminase 1
Pre-frontal cortex	Streptozocin	ENSRNOT00000016220	Mapre1	268	29967.2	16	196	108	0.6455	0.0003286	38.106	9	microtubule-associated protein, RP/EB family, member 1
Pre-frontal cortex	Streptozocin	ENSRNOT00000009431	Rpl7	260	30276	18	190	1	0.4923	0.0003283	36.639	1	ribosomal protein L7
Pre-frontal cortex	Streptozocin	ENSRNOT00000092513	Rps15a	130	14812	11	95	95	0.5615	0.0003283	26.061	11	ribosomal protein S15a
Pre-frontal cortex	Streptozocin	P62425	Rpl7a	266	29959	15	194	71	0.5113	0.0003277	38.358	4	ribosomal protein L7a
Pre-frontal cortex	Streptozocin	ENSRNOT00000089740	NA	294	34325.8	16	214	0	0.4694	0.000327	42.226	0	NA
Pre-frontal cortex	Streptozocin	P23358	Rpl12	165	17816.5	8	120	97	0.5455	0.0003267	25.712	6	ribosomal protein L12
Pre-frontal cortex	Streptozocin	ENSRNOT00000084852	Sh3bgrl2	121	13647.9	7	88	63	0.4628	0.0003267	21.024	5	SH3 domain-binding glutamic acid-rich-like protein
Pre-frontal cortex	Streptozocin	A7VJC2-2	Hnrnpa2b1 Hnrnp Hnrpa2b1	341	36013.9	27	248	0	0.6452	0.0003267	69.923	0	Heterogeneous nuclear ribonucleoproteins A2/B1, hnRNP A2/B1
Pre-frontal cortex	Streptozocin	P63324	Rps12	132	14497.5	7	96	0	0.4242	0.0003267	18.674	0	40S ribosomal protein S12
Pre-frontal cortex	Streptozocin	P05426	Rpl7	260	30292	17	189	0	0.4577	0.0003266	35.534	0	60S ribosomal protein L7
Pre-frontal cortex	Streptozocin	ENSRNOT00000087495	Dctn2	420	46175.8	19	305	0	0.5619	0.0003263	60.658	0	dynactin subunit 2
Pre-frontal cortex	Streptozocin	ENSRNOT00000024020	Vps35	796	91650.8	44	578	578	0.5741	0.0003262	112.415	44	VPS35 retromer complex component
Pre-frontal cortex	Streptozocin	ENSRNOT00000041033	Eif1	113	12720.6	5	82	18	0.5929	0.000326	14.961	2	eukaryotic translation initiation factor 1
Pre-frontal cortex	Streptozocin	Q09073	Slc25a5	298	32862.1	27	216	57	0.5872	0.0003256	57.923	8	solute carrier family 25 member 5
Pre-frontal cortex	Streptozocin	ENSRNOT00000058151	Phyhipl	375	42366.9	23	271	60	0.504	0.0003247	51.755	5	phytanoyl-CoA 2-hydroxylase interacting protein-like
Pre-frontal cortex	Streptozocin	ENSRNOT00000009511	Rap1b	184	20766.6	14	133	58	0.6957	0.0003247	41.364	5	RAP1B, member of RAS oncogene family
Pre-frontal cortex	Streptozocin	ENSRNOT00000021040	Rab1a	238	26115	17	172	0	0.5042	0.0003247	39.25	0	RAB1A, member RAS oncogene family
Pre-frontal cortex	Streptozocin	P05708	Hk1	918	102324	69	663	156	0.573	0.0003245	165.954	18	hexokinase 1
Pre-frontal cortex	Streptozocin	ENSRNOT00000093220	Rps11	158	18401	17	114	114	0.5127	0.0003242	34.734	17	ribosomal protein S11
Pre-frontal cortex	Streptozocin	Q68FS4-2	Lap3	488	52707.8	29	351	0	0.6926	0.0003231	73.515	0	Cytosol aminopeptidase, EC 3.4.11.1 (Cysteinylglycine-S-conjugate dipeptidase, EC 3.4.13.23) (Leucine aminopeptidase 3, LAP-3) (Leucyl aminopeptidase, LAP) (Peptidase S) (Proline aminopeptidase, EC 3.4.11.5) (Prolyl aminopeptidase)
Pre-frontal cortex	Streptozocin	ENSRNOT00000015325	Hnrnpa2b1	261	27609.1	20	187	0	0.6284	0.0003219	52.456	0	heterogeneous nuclear ribonucleoprotein A2/B1
Pre-frontal cortex	Streptozocin	Q9QZR6-2	Septin9 Sept9	479	54337	28	343	0	0.5136	0.0003217	64.729	0	Septin-9 (Eighth septin) (Eseptin) (Septin-like protein, SLP)
Pre-frontal cortex	Streptozocin	ENSRNOT00000025225	Rpsa	295	32785.4	15	211	211	0.5695	0.0003213	45.759	15	ribosomal protein SA
Pre-frontal cortex	Streptozocin	Q3B8Q0	Mapre2	326	36947.2	19	233	195	0.6135	0.0003211	49.604	17	microtubule-associated protein, RP/EB family, member 2
Pre-frontal cortex	Streptozocin	ENSRNOT00000012153	Cadps	1149	129684	77	820	28	0.6171	0.0003206	202.259	3	calcium dependent secretion activator
Pre-frontal cortex	Streptozocin	P34064	Psma5	241	26356.2	13	172	0	0.527	0.0003206	39.728	0	Proteasome subunit alpha type-5 (Macropain zeta chain) (Multicatalytic endopeptidase complex zeta chain) (Proteasome zeta chain)
Pre-frontal cortex	Streptozocin	Q9WUS0	Ak4	223	25169.2	11	159	159	0.6637	0.0003203	28.353	11	adenylate kinase 4
Pre-frontal cortex	Streptozocin	P48004	Psma7	254	28290.9	16	181	0	0.4764	0.0003202	39.921	0	Proteasome subunit alpha type-7 (Proteasome subunit RC6-1)
Pre-frontal cortex	Streptozocin	P35745	Acyp2 Acyp	97	10838.4	4	69	0	0.4639	0.0003196	9.599	0	Acylphosphatase-2, EC 3.6.1.7 (Acylphosphatase, muscle type isozyme) (Acylphosphate phosphohydrolase 2)
Pre-frontal cortex	Streptozocin	P08010	Gstm2	218	25668	14	155	10	0.4679	0.0003194	32.583	2	glutathione S-transferase mu 2
Pre-frontal cortex	Streptozocin	P60841	Ensa	121	13308.7	7	86	0	0.595	0.0003193	16.244	0	endosulfine alpha
Pre-frontal cortex	Streptozocin	P54690	Bcat1	411	45998.1	27	292	0	0.5985	0.0003192	71.733	0	branched chain amino acid transaminase 1
Pre-frontal cortex	Streptozocin	ENSRNOT00000019320	Map1a	2776	299468	144	1970	0	0.5688	0.0003188	393.127	0	microtubule-associated protein 1A
Pre-frontal cortex	Streptozocin	ENSRNOT00000049321	Pak1	544	60521.7	33	386	218	0.4982	0.0003188	84.899	19	p21 (RAC1) activated kinase 1
Pre-frontal cortex	Streptozocin	ENSRNOT00000018922	Fahd2a	313	34541.1	16	222	222	0.623	0.0003187	46.561	16	fumarylacetoacetate hydrolase domain containing 2A
Pre-frontal cortex	Streptozocin	ENSRNOT00000079584	Ppa1	306	34486.9	15	217	0	0.6078	0.0003186	40.685	0	inorganic pyrophosphatase 1
Pre-frontal cortex	Streptozocin	ENSRNOT00000092222	Csnk2b	151	17391.2	8	107	0	0.5298	0.0003184	21.989	0	casein kinase 2 beta
Pre-frontal cortex	Streptozocin	ENSRNOT00000067854	Dynlrb1	96	10964.7	7	68	64	0.7396	0.0003182	20.971	6	dynein light chain roadblock-type 1
Pre-frontal cortex	Streptozocin	ENSRNOT00000060467	Rab2b	215	24052	15	152	61	0.6186	0.0003176	38.692	7	RAB2B, member RAS oncogene family
Pre-frontal cortex	Streptozocin	ENSRNOT00000013600	Brk1	75	8737.4	7	53	53	0.5467	0.0003175	13.31	7	BRICK1 subunit of SCAR/WAVE actin nucleating complex
Pre-frontal cortex	Streptozocin	ENSRNOT00000025104	Rab6a	208	23512.9	13	147	0	0.476	0.0003175	27.375	0	RAB6A, member RAS oncogene family
Pre-frontal cortex	Streptozocin	ENSRNOT00000051678	RGD1566085	309	34253.3	12	218	7	0.4401	0.000317	35.13	1	similar to pyridoxal (pyridoxine, vitamin B6) kinase
Pre-frontal cortex	Streptozocin	ENSRNOT00000072184	Ncam1	550	60907.3	24	388	0	0.4127	0.0003169	77.991	0	neural cell adhesion molecule 1
Pre-frontal cortex	Streptozocin	P62168	Ncs1	190	21846.9	13	134	133	0.5526	0.0003169	30.618	12	neuronal calcium sensor 1
Pre-frontal cortex	Streptozocin	ENSRNOT00000005293	Map2k4	281	32210.3	15	198	198	0.5943	0.0003166	37.822	15	mitogen activated protein kinase kinase 4
Pre-frontal cortex	Streptozocin	P07825	Syp	307	33271.1	18	216	215	0.2443	0.0003161	35.598	17	synaptophysin
Pre-frontal cortex	Streptozocin	ENSRNOT00000003046	Cops4	406	46242.7	21	285	285	0.6946	0.0003154	58.249	21	COP9 signalosome subunit 4
Pre-frontal cortex	Streptozocin	ENSRNOT00000020785	Usp5	858	95700.3	51	602	591	0.5466	0.0003152	134.691	50	ubiquitin specific peptidase 5
Pre-frontal cortex	Streptozocin	P29266	Hibadh	335	35261.6	21	235	235	0.6328	0.0003152	56.66	21	3-hydroxyisobutyrate dehydrogenase
Pre-frontal cortex	Streptozocin	ENSRNOT00000019642	Psmd13	376	42772.2	25	263	263	0.734	0.0003143	60.83	25	proteasome 26S subunit, non-ATPase 13
Pre-frontal cortex	Streptozocin	ENSRNOT00000074002	Ank2	511	55196.8	24	357	0	0.5401	0.0003139	76.333	0	ankyrin 2
Pre-frontal cortex	Streptozocin	ENSRNOT00000080453	Apoe	312	35713.3	24	218	197	0.5801	0.0003139	57.682	22	apolipoprotein E
Pre-frontal cortex	Streptozocin	ENSRNOT00000084437	Snap91	897	91354.4	53	626	0	0.3857	0.0003135	137.325	0	synaptosome associated protein 91
Pre-frontal cortex	Streptozocin	Q63768-2	Crk Crko	204	22831.5	13	142	0	0.6225	0.0003127	30.689	0	Adapter molecule crk (Proto-oncogene c-Crk) (p38)
Pre-frontal cortex	Streptozocin	ENSRNOT00000024286	Rab8b	207	23570.1	15	144	18	0.4589	0.0003125	29.291	3	RAB8B, member RAS oncogene family
Pre-frontal cortex	Streptozocin	F1LMZ8	Psmd11	422	47416	27	293	0	0.6232	0.0003119	68.477	0	26S proteasome non-ATPase regulatory subunit 11 (26S proteasome regulatory subunit RPN6)
Pre-frontal cortex	Streptozocin	ENSRNOT00000085644	Myl6	111	12502.1	10	77	0	0.4955	0.0003117	22.084	0	myosin light chain 6
Pre-frontal cortex	Streptozocin	Q62717	Cadps	1289	146155	81	894	40	0.5555	0.0003116	210.789	2	calcium dependent secretion activator
Pre-frontal cortex	Streptozocin	P85968	Pgd	483	53184	23	335	34	0.5321	0.0003116	58.743	2	phosphogluconate dehydrogenase
Pre-frontal cortex	Streptozocin	ENSRNOT00000010197	Rab11b	218	24455.5	14	151	23	0.5642	0.0003112	37.018	1	RAB11B, member RAS oncogene family
Pre-frontal cortex	Streptozocin	P34926	Map1a	2774	299330	144	1916	9	0.5692	0.0003103	389.888	2	microtubule-associated protein 1A
Pre-frontal cortex	Streptozocin	ENSRNOT00000065535	Synj1	1567	171986	81	1082	0	0.5073	0.0003102	211.382	0	synaptojanin 1
Pre-frontal cortex	Streptozocin	ENSRNOT00000080254	Tnr	1358	149487	70	937	0	0.5434	0.00031	203.864	0	tenascin R
Pre-frontal cortex	Streptozocin	Q62910	Synj1	1574	172755	82	1085	0	0.5178	0.0003097	213.722	0	synaptojanin 1
Pre-frontal cortex	Streptozocin	ENSRNOT00000017086	Sugt1	218	23812.7	16	150	73	0	0.0003091	37.488	7	SGT1 homolog, MIS12 kinetochore complex assembly cochaperone
Pre-frontal cortex	Streptozocin	P08644	Kras	189	21624	9	130	0	0.5979	0.000309	27.667	0	KRAS proto-oncogene, GTPase
Pre-frontal cortex	Streptozocin	P13596	Ncam1	858	94581.2	42	590	62	0.4499	0.0003089	122.6	6	neural cell adhesion molecule 1
Pre-frontal cortex	Streptozocin	ENSRNOT00000082616	Cyria	323	37286.7	25	222	222	0.6378	0.0003088	61.717	25	CYFIP related Rac1 interactor A
Pre-frontal cortex	Streptozocin	ENSRNOT00000024827	Pgls	291	30784	11	200	0	0.6735	0.0003088	34.067	0	6-phosphogluconolactonase
Pre-frontal cortex	Streptozocin	ENSRNOT00000022963	Pgm2l1	621	70171.3	37	426	426	0.5894	0.0003082	87.34	37	phosphoglucomutase 2-like 1
Pre-frontal cortex	Streptozocin	ENSRNOT00000013272	Necap1	277	29756.1	9	190	178	0.4224	0.0003082	24.669	8	NECAP endocytosis associated 1
Pre-frontal cortex	Streptozocin	ENSRNOT00000035060	Map1lc3a	121	14245.4	5	83	73	0.4463	0.0003082	11.935	4	microtubule-associated protein 1 light chain 3 alpha
Pre-frontal cortex	Streptozocin	ENSRNOT00000073652	Bola2	86	10162.2	4	59	59	0.5233	0.0003082	10.767	4	bolA family member 2
Pre-frontal cortex	Streptozocin	ENSRNOT00000084839	Sirt2	388	43117.4	25	266	0	0.549	0.000308	70.385	0	sirtuin 2
Pre-frontal cortex	Streptozocin	ENSRNOT00000006859	LOC108350502	292	31004.6	21	200	0	0.5171	0.0003077	47.791	0	40S ribosomal protein S2 pseudogene
Pre-frontal cortex	Streptozocin	ENSRNOT00000077789	Rab8a	206	23675.2	15	141	0	0.4951	0.0003075	28.439	0	RAB8A, member RAS oncogene family
Pre-frontal cortex	Streptozocin	ENSRNOT00000023648	Ppme1	386	42271.2	24	264	264	0.6528	0.0003073	58.064	24	protein phosphatase methylesterase 1
Pre-frontal cortex	Streptozocin	ENSRNOT00000036821	Tubal3	382	42787.3	31	261	7	0.301	0.000307	70.639	2	tubulin, alpha-like 3
Pre-frontal cortex	Streptozocin	ENSRNOT00000027552	Prkar2a	401	45433.7	20	274	29	0.5436	0.000307	54.464	1	protein kinase cAMP-dependent type II regulatory subunit alpha
Pre-frontal cortex	Streptozocin	ENSRNOT00000008685	Thy1	161	18142.7	10	110	109	0.2857	0.000307	24.23	9	Thy-1 cell surface antigen
Pre-frontal cortex	Streptozocin	P04692-3	Tpm1 Alpha-tm Tpma	281	32457.6	17	192	0	0.4164	0.000307	42.064	0	Tropomyosin alpha-1 chain (Alpha-tropomyosin) (Tropomyosin-1)
Pre-frontal cortex	Streptozocin	P30009	Marcks Macs	309	29758.9	14	211	18	0.6958	0.0003068	45.09	2	Myristoylated alanine-rich C-kinase substrate, MARCKS (Protein kinase C substrate 80 kDa protein)
Pre-frontal cortex	Streptozocin	ENSRNOT00000047666	Ncam1	731	80486.2	34	499	0	0.4419	0.0003067	98.315	0	neural cell adhesion molecule 1
Pre-frontal cortex	Streptozocin	P27952	Rps2	293	31193.7	21	200	0	0.5154	0.0003067	47.791	0	ribosomal protein S2
Pre-frontal cortex	Streptozocin	P08461	Dlat	632	67105.4	36	431	73	0.4937	0.0003064	93.228	8	dihydrolipoamide S-acetyltransferase
Pre-frontal cortex	Streptozocin	ENSRNOT00000016329	Rps3a	264	29907.7	15	180	115	0.4621	0.0003063	32.285	7	ribosomal protein S3a
Pre-frontal cortex	Streptozocin	P55051	Fabp7	132	14836.4	7	90	90	0.4621	0.0003063	18.633	7	fatty acid binding protein 7
Pre-frontal cortex	Streptozocin	ENSRNOT00000024617	Tpm1	248	28521.5	16	169	0	0.4234	0.0003062	38.453	0	tropomyosin 1
Pre-frontal cortex	Streptozocin	ENSRNOT00000009249	Psmd6	389	45551.2	24	265	265	0.5938	0.0003061	57.375	24	proteasome 26S subunit, non-ATPase 6
Pre-frontal cortex	Streptozocin	ENSRNOT00000020748	Rab8a	207	23635.2	15	141	0	0.4928	0.000306	28.439	0	RAB8A, member RAS oncogene family
Pre-frontal cortex	Streptozocin	Q9QXU9	Pcsk1n	260	27379.8	10	177	177	0.4692	0.0003059	32.55	10	proprotein convertase subtilisin/kexin type 1 inhibitor
Pre-frontal cortex	Streptozocin	ENSRNOT00000003697	Prpsap2	369	40822.3	20	251	212	0.561	0.0003056	51.233	17	phosphoribosyl pyrophosphate synthetase-associated protein 2
Pre-frontal cortex	Streptozocin	P13803	Etfa	333	34911.5	14	226	226	0.6066	0.0003049	39.201	14	electron transfer flavoprotein subunit alpha
Pre-frontal cortex	Streptozocin	ENSRNOT00000022897	Rps27	84	9436.8	4	57	31	0.3929	0.0003049	9.523	2	ribosomal protein S27
Pre-frontal cortex	Streptozocin	Q62910-4	Synj1	1558	171134	80	1057	0	0.5135	0.0003048	208.394	0	Synaptojanin-1, EC 3.1.3.36 (Synaptic inositol 1,4,5-trisphosphate 5-phosphatase 1)
Pre-frontal cortex	Streptozocin	ENSRNOT00000073771	Impact	317	35954.2	19	215	215	0.6341	0.0003047	51.421	19	impact RWD domain protein
Pre-frontal cortex	Streptozocin	ENSRNOT00000003083	Enoph1	261	28838.6	11	177	177	0.6284	0.0003047	34.201	11	enolase-phosphatase 1
Pre-frontal cortex	Streptozocin	ENSRNOT00000078710	Rab1a	323	36373.3	20	219	0	0.4056	0.0003046	45.463	0	RAB1A, member RAS oncogene family
Pre-frontal cortex	Streptozocin	P62271	Rps18	152	17689.8	11	103	103	0.5263	0.0003044	23.076	11	ribosomal protein S18
Pre-frontal cortex	Streptozocin	ENSRNOT00000050511	Tst	297	33367.8	18	201	175	0.5084	0.0003041	40.623	16	thiosulfate sulfurtransferase
Pre-frontal cortex	Streptozocin	ENSRNOT00000004770	Lap3	519	56096.7	29	351	0	0.6513	0.0003038	73.515	0	leucine aminopeptidase 3
Pre-frontal cortex	Streptozocin	ENSRNOT00000065229	Septin8	429	49807.2	25	290	0	0.5991	0.0003037	62.134	0	septin 8
Pre-frontal cortex	Streptozocin	Q64548	Rtn1	777	82932.5	36	524	238	0.5586	0.000303	106.817	16	reticulon 1
Pre-frontal cortex	Streptozocin	O35353	Gnb4	340	37321	20	229	27	0.5353	0.0003026	51.499	5	G protein subunit beta 4
Pre-frontal cortex	Streptozocin	ENSRNOT00000003407	Tnr	1357	149408	67	913	0	0.5306	0.0003023	195.383	0	tenascin R
Pre-frontal cortex	Streptozocin	P52296	Kpnb1	875	97044	45	587	1	0.5051	0.0003014	120.795	1	karyopherin subunit beta 1
Pre-frontal cortex	Streptozocin	ENSRNOT00000078872	Hnrnpa3	379	39609.6	24	254	19	0.3826	0.0003011	59.332	2	heterogeneous nuclear ribonucleoprotein A3
Pre-frontal cortex	Streptozocin	ENSRNOT00000061878	Rab5b	215	23641.9	11	144	63	0.4837	0.0003009	27.495	4	RAB5B, member RAS oncogene family
Pre-frontal cortex	Streptozocin	Q64119	Myl6l	151	16946.1	12	101	0	0.5033	0.0003005	27.222	0	myosin, light polypeptide 6, alkali, smooth muscle and non-muscle-like
Pre-frontal cortex	Streptozocin	ENSRNOT00000019748	Dclk1	433	47633.1	23	289	0	0.6166	0.0002999	70.525	0	doublecortin-like kinase 1
Pre-frontal cortex	Streptozocin	ENSRNOT00000005615	Prps2	318	34773	16	212	13	0.4748	0.0002995	41.29	4	phosphoribosyl pyrophosphate synthetase 2
Pre-frontal cortex	Streptozocin	ENSRNOT00000085383	NA	132	15072.5	4	88	57	0.4697	0.0002995	14.53	3	NA
Pre-frontal cortex	Streptozocin	ENSRNOT00000081051	Cmpk1	239	27030	12	159	0	0.4059	0.0002989	30.003	0	cytidine/uridine monophosphate kinase 1
Pre-frontal cortex	Streptozocin	ENSRNOT00000007558	Csnk2a1	391	45026.8	24	260	223	0.5729	0.0002988	64.135	21	casein kinase 2 alpha 1
Pre-frontal cortex	Streptozocin	ENSRNOT00000076528	Csnk2b	215	24908	14	143	36	0.5628	0.0002988	36.051	6	casein kinase 2 beta
Pre-frontal cortex	Streptozocin	ENSRNOT00000082518	Myl6	152	16984.1	12	101	0	0.5	0.0002985	27.222	0	myosin light chain 6
Pre-frontal cortex	Streptozocin	ENSRNOT00000025615	Eif1b	113	12797.6	4	75	11	0.5929	0.0002982	13.425	1	eukaryotic translation initiation factor 1B
Pre-frontal cortex	Streptozocin	ENSRNOT00000086608	Psmb3	205	22931.4	9	136	136	0.4732	0.0002981	24.938	9	proteasome 20S subunit beta 3
Pre-frontal cortex	Streptozocin	ENSRNOT00000023948	AC132020.1	104	11445.1	6	69	69	0.3942	0.0002981	16.089	6	Uncharacterized protein
Pre-frontal cortex	Streptozocin	ENSRNOT00000002052	Rab4b	213	23595.9	15	141	87	0.6948	0.0002974	37.073	10	RAB4B, member RAS oncogene family
Pre-frontal cortex	Streptozocin	ENSRNOT00000093407	Dclk1	739	81942	40	489	0	0.5792	0.0002973	118.429	0	doublecortin-like kinase 1
Pre-frontal cortex	Streptozocin	P04692-7	Tpm1 Alpha-tm Tpma	248	28543.5	15	164	0	0.3427	0.0002971	36.03	0	Tropomyosin alpha-1 chain (Alpha-tropomyosin) (Tropomyosin-1)
Pre-frontal cortex	Streptozocin	ENSRNOT00000028084	Vat1	404	43073	19	267	267	0.5173	0.0002969	54.908	19	vesicle amine transport 1
Pre-frontal cortex	Streptozocin	Q6PEC0	Nudt2	147	16900.6	8	97	60	0.6531	0.0002965	19.39	5	nudix hydrolase 2
Pre-frontal cortex	Streptozocin	ENSRNOT00000024914	Ptpa	323	36575.6	17	213	204	0.6378	0.0002963	42.049	16	protein phosphatase 2 phosphatase activator
Pre-frontal cortex	Streptozocin	Q6URK4-2	Hnrnpa3 Hnrpa3	357	37045.2	22	235	0	0.3641	0.0002957	54.559	0	Heterogeneous nuclear ribonucleoprotein A3, hnRNP A3
Pre-frontal cortex	Streptozocin	ENSRNOT00000075423	Tprg1l	266	29807.4	14	175	45	0.6391	0.0002956	42.097	4	tumor protein p63 regulated 1-like
Pre-frontal cortex	Streptozocin	ENSRNOT00000018005	Psmb5	263	28523.2	15	173	17	0.5551	0.0002955	39.97	1	proteasome 20S subunit beta 5
Pre-frontal cortex	Streptozocin	ENSRNOT00000078720	Gnai2	172	19201.5	10	113	0	0.6279	0.0002952	28.384	0	G protein subunit alpha i2
Pre-frontal cortex	Streptozocin	ENSRNOT00000080009	Acyp1	99	11286.8	5	65	65	0.5455	0.000295	12.718	5	acylphosphatase 1
Pre-frontal cortex	Streptozocin	ENSRNOT00000008948	Lancl2	450	50917.6	32	295	295	0.6889	0.0002945	83.395	32	LanC like 2
Pre-frontal cortex	Streptozocin	ENSRNOT00000083005	Map1a	3014	325399	145	1974	4	0.5272	0.0002943	394.837	1	microtubule-associated protein 1A
Pre-frontal cortex	Streptozocin	ENSRNOT00000015474	Hspa4l	1017	114218	54	665	590	0.5398	0.0002938	144.334	49	heat shock protein family A (Hsp70) member 4 like
Pre-frontal cortex	Streptozocin	ENSRNOT00000086663	LOC314123	231	25964.9	12	151	22	0.3636	0.0002937	31.264	1	similar to Aspartate aminotransferase, mitochondrial precursor (Transaminase A) (Glutamate oxaloacetate transaminase 2)
Pre-frontal cortex	Streptozocin	P04692-4	Tpm1 Alpha-tm Tpma	251	28668.6	15	164	0	0.3386	0.0002936	36.03	0	Tropomyosin alpha-1 chain (Alpha-tropomyosin) (Tropomyosin-1)
Pre-frontal cortex	Streptozocin	ENSRNOT00000022495	Phpt1	124	13983.7	8	81	81	0.379	0.0002935	16.477	8	phosphohistidine phosphatase 1
Pre-frontal cortex	Streptozocin	Q5XIE6-2	Hibch	311	34485.1	16	203	0	0.5434	0.0002933	38.326	0	3-hydroxyisobutyryl-CoA hydrolase, mitochondrial, EC 3.1.2.4 (3-hydroxyisobutyryl-coenzyme A hydrolase, HIB-CoA hydrolase, HIBYL-CoA-H)
Pre-frontal cortex	Streptozocin	ENSRNOT00000086259	Dnajc6	938	102106	51	612	22	0.6471	0.0002931	140.776	2	DnaJ heat shock protein family (Hsp40) member C6
Pre-frontal cortex	Streptozocin	ENSRNOT00000074695	Sh3gl1	368	41448.2	22	240	180	0.5489	0.000293	51.664	17	SH3 domain containing GRB2 like 1, endophilin A2
Pre-frontal cortex	Streptozocin	ENSRNOT00000010759	Rpl15	204	24113.1	13	133	19	0.4657	0.0002929	28.309	2	ribosomal protein L15
Pre-frontal cortex	Streptozocin	ENSRNOT00000021105	Atic	592	64150.2	37	385	385	0.7111	0.0002922	99.225	37	5-aminoimidazole-4-carboxamide ribonucleotide formyltransferase/IMP cyclohydrolase
Pre-frontal cortex	Streptozocin	ENSRNOT00000015152	Hnrnpa2b1	301	31125.5	21	195	0	0.6379	0.0002911	56.56	0	heterogeneous nuclear ribonucleoprotein A2/B1
Pre-frontal cortex	Streptozocin	ENSRNOT00000086539	Dnajc6	911	99245.3	49	590	0	0.6103	0.000291	134.141	0	DnaJ heat shock protein family (Hsp40) member C6
Pre-frontal cortex	Streptozocin	Q9Z2L9-4	Ndrg4 Bdm1 Ndr4	339	37101.3	18	219	0	0.6018	0.0002902	52.048	0	Protein NDRG4 (Brain development-related molecule 1)
Pre-frontal cortex	Streptozocin	ENSRNOT00000073247	Gpx1	200	22123.3	13	129	0	0.65	0.0002898	29.487	0	glutathione peroxidase 1
Pre-frontal cortex	Streptozocin	F1LQ48-2	Hnrnpl Fblim1	245	27215.1	17	158	0	0.8	0.0002897	48.512	0	Heterogeneous nuclear ribonucleoprotein L, hnRNP L
Pre-frontal cortex	Streptozocin	ENSRNOT00000039569	AABR07032317.1	323	34799.8	20	208	1	0.2074	0.0002893	44.446	1	Glyceraldehyde-3-phosphate dehydrogenase, EC 1.2.1.12
Pre-frontal cortex	Streptozocin	ENSRNOT00000025510	Txnl1	289	32210.7	12	186	0	0.5329	0.0002892	36.827	0	thioredoxin-like 1
Pre-frontal cortex	Streptozocin	ENSRNOT00000010679	Scg5	210	23678.9	8	135	0	0.6	0.0002888	24.217	0	secretogranin V
Pre-frontal cortex	Streptozocin	P27682	Scg5	210	23650.8	8	135	0	0.6	0.0002888	24.217	0	secretogranin V
Pre-frontal cortex	Streptozocin	ENSRNOT00000088647	Epb41l3	923	102611	52	593	0	0.5601	0.0002886	131.557	0	erythrocyte membrane protein band 4.1-like 3
Pre-frontal cortex	Streptozocin	P04041	Gpx1	201	22274.3	13	129	0	0.6468	0.0002883	29.487	0	glutathione peroxidase 1
Pre-frontal cortex	Streptozocin	ENSRNOT00000015779	Eif5a2	153	16764.2	7	98	6	0.3268	0.0002878	18.271	1	eukaryotic translation initiation factor 5A2
Pre-frontal cortex	Streptozocin	ENSRNOT00000027459	Asrgl1	333	34370.6	18	213	213	0.5285	0.0002874	49.263	18	asparaginase and isoaspartyl peptidase 1
Pre-frontal cortex	Streptozocin	Q6AYN4-2	Phyhipl	330	37503.6	18	211	0	0.4303	0.0002873	37.012	0	Phytanoyl-CoA hydroxylase-interacting protein-like
Pre-frontal cortex	Streptozocin	ENSRNOT00000030344	Rab5c	216	23392.8	16	138	57	0.6667	0.000287	38.422	9	RAB5C, member RAS oncogene family
Pre-frontal cortex	Streptozocin	ENSRNOT00000073091	Wasf1	559	61458.8	25	357	313	0.5349	0.0002869	72.201	23	WASP family member 1
Pre-frontal cortex	Streptozocin	Q63198	Cntn1	1021	113405	57	652	652	0.5534	0.0002869	149.22	57	contactin 1
Pre-frontal cortex	Streptozocin	ENSRNOT00000077231	Mgll	318	35265.9	15	203	0	0.5849	0.0002868	42.452	0	monoglyceride lipase
Pre-frontal cortex	Streptozocin	P37996	Arl3	182	20425.7	9	116	0	0.6923	0.0002864	29.169	0	ADP ribosylation factor like GTPase 3
Pre-frontal cortex	Streptozocin	ENSRNOT00000083831	Txnl1	292	32661.1	12	186	0	0.5274	0.0002862	36.827	0	thioredoxin-like 1
Pre-frontal cortex	Streptozocin	ENSRNOT00000046078	Diras1	198	22259.5	13	126	113	0.5303	0.0002859	31.114	11	DIRAS family GTPase 1
Pre-frontal cortex	Streptozocin	ENSRNOT00000032792	Snap91	918	93627.4	51	584	0	0.3551	0.0002858	128.248	0	synaptosome associated protein 91
Pre-frontal cortex	Streptozocin	ENSRNOT00000077715	Ppp2r5e	467	54660.5	24	297	27	0.4069	0.0002857	58.239	5	protein phosphatase 2 regulatory subunit B', epsilon
Pre-frontal cortex	Streptozocin	ENSRNOT00000091596	Hnrnpa1	313	33581	21	199	0	0.4856	0.0002856	50.004	0	heterogeneous nuclear ribonucleoprotein A1
Pre-frontal cortex	Streptozocin	ENSRNOT00000090211	Nsfl1c	370	40637.4	20	235	235	0.5838	0.0002854	54.866	20	NSFL1 cofactor
Pre-frontal cortex	Streptozocin	ENSRNOT00000082288	Myo5a	1697	196940	103	1078	0	0.5592	0.0002854	258.242	0	myosin VA
Pre-frontal cortex	Streptozocin	ENSRNOT00000078337	Dclk1	729	80935.5	36	463	0	0.5171	0.0002853	104.254	0	doublecortin-like kinase 1
Pre-frontal cortex	Streptozocin	ENSRNOT00000024863	Taldo1	337	37418.4	23	214	205	0.4392	0.0002853	46.292	22	transaldolase 1
Pre-frontal cortex	Streptozocin	P21533	Rpl6	298	33522.9	16	189	189	0.3926	0.0002849	32.334	16	ribosomal protein L6
Pre-frontal cortex	Streptozocin	ENSRNOT00000011748	Gdap1l1	366	41652.3	19	232	228	0.5355	0.0002848	52.128	18	ganglioside-induced differentiation-associated protein 1-like 1
Pre-frontal cortex	Streptozocin	ENSRNOT00000031007	Ube2m	183	20868.6	10	116	116	0.5027	0.0002848	23.079	10	ubiquitin-conjugating enzyme E2M
Pre-frontal cortex	Streptozocin	ENSRNOT00000055302	Pcbp2	335	35306.2	20	212	25	0.6209	0.0002843	51.912	1	poly(rC) binding protein 2
Pre-frontal cortex	Streptozocin	ENSRNOT00000017588	Atox1	68	7269.7	6	43	43	0.8529	0.0002841	18.407	6	antioxidant 1 copper chaperone
Pre-frontal cortex	Streptozocin	ENSRNOT00000022241	Rnh1	456	49869.1	22	288	0	0.7083	0.0002838	62.995	0	ribonuclease/angiogenin inhibitor 1
Pre-frontal cortex	Streptozocin	ENSRNOT00000005522	Lasp1	263	29933.4	18	166	157	0.5437	0.0002836	41.988	17	LIM and SH3 protein 1
Pre-frontal cortex	Streptozocin	ENSRNOT00000067318	Arhgap1	439	50573.2	25	277	271	0.6538	0.0002835	64.874	24	Rho GTPase activating protein 1
Pre-frontal cortex	Streptozocin	P70580	Pgrmc1	195	21566.7	12	123	48	0.6359	0.0002834	30.033	2	progesterone receptor membrane component 1
Pre-frontal cortex	Streptozocin	P68403-2	Prkcb Pkcb Prkcb1	673	76826.1	45	424	0	0.6166	0.0002831	108.774	0	Protein kinase C beta type, PKC-B, PKC-beta, EC 2.7.11.13
Pre-frontal cortex	Streptozocin	ENSRNOT00000006755	Ppp2r5e	429	50296.3	19	270	0	0.3753	0.0002828	48.926	0	protein phosphatase 2 regulatory subunit B', epsilon
Pre-frontal cortex	Streptozocin	ENSRNOT00000025819	Psmc4	418	47360.6	24	263	263	0.7201	0.0002827	62.937	24	proteasome 26S subunit, ATPase 4
Pre-frontal cortex	Streptozocin	ENSRNOT00000079535	Myo5a	1694	196582	102	1066	0	0.5584	0.0002827	254.739	0	myosin VA
Pre-frontal cortex	Streptozocin	ENSRNOT00000033015	Sars1	512	58532.8	24	322	0	0.4453	0.0002826	61.092	0	seryl-tRNA synthetase 1
Pre-frontal cortex	Streptozocin	P62332	Arf6	175	20051.4	10	110	69	0.7143	0.0002824	25.278	6	ADP-ribosylation factor 6
Pre-frontal cortex	Streptozocin	ENSRNOT00000066163	Camk2g	527	58983	38	331	22	0.6831	0.0002822	93.147	2	calcium/calmodulin-dependent protein kinase II gamma
Pre-frontal cortex	Streptozocin	ENSRNOT00000019104	Psmd7	320	36451.2	14	201	201	0.55	0.0002822	40.77	14	proteasome 26S subunit, non-ATPase 7
Pre-frontal cortex	Streptozocin	ENSRNOT00000007298	Dlst	454	48850.3	22	285	0	0.4471	0.000282	58.342	0	dihydrolipoamide S-succinyltransferase
Pre-frontal cortex	Streptozocin	Q01205	Dlst	454	48876.3	22	285	0	0.4471	0.000282	58.342	0	dihydrolipoamide S-succinyltransferase
Pre-frontal cortex	Streptozocin	ENSRNOT00000083162	Septin8	483	55752.9	26	303	13	0.5652	0.0002818	66.06	1	septin 8
Pre-frontal cortex	Streptozocin	Q05140-2	Snap91	896	91355.4	53	562	0	0.394	0.0002818	128.066	0	Clathrin coat assembly protein AP180 (91 kDa synaptosomal-associated protein) (Clathrin coat-associated protein AP180)
Pre-frontal cortex	Streptozocin	ENSRNOT00000011052	Cdk5	292	33215.2	16	183	159	0.5479	0.0002816	37.411	13	cyclin-dependent kinase 5
Pre-frontal cortex	Streptozocin	Q9WTP0	Epb41l1	879	98164	48	551	0	0.5176	0.0002816	121.502	0	erythrocyte membrane protein band 4.1-like 1
Pre-frontal cortex	Streptozocin	ENSRNOT00000015518	Hnrnph2	449	49244.3	23	281	142	0.4788	0.0002812	57.729	11	heterogeneous nuclear ribonucleoprotein H2
Pre-frontal cortex	Streptozocin	ENSRNOT00000026297	Nudt21	227	26205.7	10	142	142	0.4978	0.000281	23.021	10	nudix hydrolase 21
Pre-frontal cortex	Streptozocin	ENSRNOT00000000707	Marcks	309	29924	12	193	0	0.5469	0.0002806	38.545	0	myristoylated alanine rich protein kinase C substrate
Pre-frontal cortex	Streptozocin	P11730-3	Camk2g	495	55907.4	36	309	0	0.6384	0.0002805	84.861	0	Calcium/calmodulin-dependent protein kinase type II subunit gamma, CaM kinase II subunit gamma, CaMK-II subunit gamma, EC 2.7.11.17
Pre-frontal cortex	Streptozocin	P13697	Me1 Mod-1 Mod1	572	63944	31	357	344	0.6381	0.0002804	78.71	30	NADP-dependent malic enzyme, NADP-ME, EC 1.1.1.40 (Malic enzyme 1)
Pre-frontal cortex	Streptozocin	Q9QZR6	Septin9	564	63734	29	352	9	0.4504	0.0002804	66.221	1	septin 9
Pre-frontal cortex	Streptozocin	ENSRNOT00000027093	Arl3	186	20835	9	116	0	0.6774	0.0002802	29.169	0	ADP ribosylation factor like GTPase 3
Pre-frontal cortex	Streptozocin	ENSRNOT00000017413	Ndrg4	352	38417.1	19	219	0	0.608	0.0002795	52.208	0	NDRG family member 4
Pre-frontal cortex	Streptozocin	Q9Z2L9	Ndrg4 Bdm1 Ndr4	352	38444.1	19	219	0	0.608	0.0002795	52.208	0	Protein NDRG4 (Brain development-related molecule 1)
Pre-frontal cortex	Streptozocin	P04256	Hnrnpa1	320	34173.2	21	199	0	0.475	0.0002794	50.004	0	heterogeneous nuclear ribonucleoprotein A1
Pre-frontal cortex	Streptozocin	ENSRNOT00000074683	Twf2	349	39430.4	18	217	203	0.5387	0.0002793	48.943	15	twinfilin actin-binding protein 2
Pre-frontal cortex	Streptozocin	ENSRNOT00000014274	Impa1	277	30457.4	20	172	29	0.5271	0.000279	44.46	2	inositol monophosphatase 1
Pre-frontal cortex	Streptozocin	ENSRNOT00000019569	Dbn1	706	77278.1	35	438	1	0.4972	0.0002787	93.744	1	drebrin 1
Pre-frontal cortex	Streptozocin	ENSRNOT00000044407	Cbx3	71	7904.2	3	44	0	0.2817	0.0002784	8.406	0	chromobox 3
Pre-frontal cortex	Streptozocin	ENSRNOT00000030428	Rpl5	297	34418.7	13	184	184	0.3838	0.0002783	34.498	13	ribosomal protein L5
Pre-frontal cortex	Streptozocin	Q62910-3	Synj1	1174	127691	53	726	0	0.4668	0.0002778	139.479	0	Synaptojanin-1, EC 3.1.3.36 (Synaptic inositol 1,4,5-trisphosphate 5-phosphatase 1)
Pre-frontal cortex	Streptozocin	Q07266	Dbn1	707	77406.2	34	437	0	0.4583	0.0002777	92.307	0	drebrin 1
Pre-frontal cortex	Streptozocin	ENSRNOT00000054830	Ehd1	534	60546.6	31	330	135	0.6367	0.0002776	77.365	14	EH-domain containing 1
Pre-frontal cortex	Streptozocin	ENSRNOT00000087752	Mapre1	89	10124.2	3	55	0	0.5843	0.0002776	8.637	0	microtubule-associated protein, RP/EB family, member 1
Pre-frontal cortex	Streptozocin	B0BNF1	Septin8 Sept8	442	51201.9	24	273	0	0.5249	0.0002775	57.989	0	Septin-8
Pre-frontal cortex	Streptozocin	Q5U211	Snx3	162	18732.7	9	100	86	0.4198	0.0002773	18.338	7	sorting nexin 3
Pre-frontal cortex	Streptozocin	P46844	Blvra	295	33526.5	16	182	16	0.6102	0.0002772	39.944	1	biliverdin reductase A
Pre-frontal cortex	Streptozocin	ENSRNOT00000014177	Ctsb	339	37501.7	21	209	0	0.4808	0.000277	48.813	0	cathepsin B
Pre-frontal cortex	Streptozocin	P00787	Ctsb	339	37427.6	21	209	0	0.4808	0.000277	48.813	0	Cathepsin B, EC 3.4.22.1 (Cathepsin B1) (RSG-2) [Cleaved into: Cathepsin B light chain; Cathepsin B heavy chain ]
Pre-frontal cortex	Streptozocin	ENSRNOT00000024083	Etfb	255	27652	18	157	157	0.5569	0.0002766	45.551	18	electron transfer flavoprotein subunit beta
Pre-frontal cortex	Streptozocin	ENSRNOT00000077726	Napg	312	34619.3	17	192	51	0.5801	0.0002765	44.451	3	NSF attachment protein gamma
Pre-frontal cortex	Streptozocin	ENSRNOT00000014404	Nrgn	78	7473.5	4	48	45	0.6538	0.0002765	10.708	3	neurogranin
Pre-frontal cortex	Streptozocin	ENSRNOT00000029076	Tpm3	285	32955.8	16	175	1	0.3895	0.0002759	37.111	1	tropomyosin 3
Pre-frontal cortex	Streptozocin	ENSRNOT00000065802	Napg	230	25567.7	14	141	0	0.6391	0.0002754	36.244	0	NSF attachment protein gamma
Pre-frontal cortex	Streptozocin	ENSRNOT00000024430	Vim	466	53650	32	285	0	0.6695	0.0002748	78.802	0	vimentin
Pre-frontal cortex	Streptozocin	P31000	Vim	466	53682	32	285	0	0.6695	0.0002748	78.802	0	vimentin
Pre-frontal cortex	Streptozocin	P50475	Aars1	968	106705	55	591	584	0.6147	0.0002743	137.746	54	alanyl-tRNA synthetase 1
Pre-frontal cortex	Streptozocin	ENSRNOT00000049426	Epb41l3	870	96874.2	46	531	0	0.5034	0.0002742	115.752	0	erythrocyte membrane protein band 4.1-like 3
Pre-frontal cortex	Streptozocin	ENSRNOT00000050223	H3f3b	136	15300.5	6	83	49	0.4485	0.0002742	14.893	1	H3.3 histone B
Pre-frontal cortex	Streptozocin	ENSRNOT00000014267	Car1	261	28264.2	13	159	159	0.5747	0.0002737	36.014	13	carbonic anhydrase 1
Pre-frontal cortex	Streptozocin	ENSRNOT00000028484	Psmb4	263	29129.3	9	160	14	0.4867	0.0002733	30.454	1	proteasome 20S subunit beta 4
Pre-frontal cortex	Streptozocin	ENSRNOT00000017989	Pip4k2b	416	47215.8	24	253	147	0.4351	0.0002732	58.8	14	phosphatidylinositol-5-phosphate 4-kinase type 2 beta
Pre-frontal cortex	Streptozocin	Q9QYF3	Myo5a	1828	211612	101	1111	32	0.5246	0.0002731	262.412	3	myosin VA
Pre-frontal cortex	Streptozocin	ENSRNOT00000028760	Sv2a	742	82589.9	33	451	451	0.3841	0.0002731	84.823	33	synaptic vesicle glycoprotein 2a
Pre-frontal cortex	Streptozocin	Q5XIE6	Hibch	385	42979.3	19	234	31	0.5403	0.0002731	47.937	3	3-hydroxyisobutyryl-CoA hydrolase
Pre-frontal cortex	Streptozocin	ENSRNOT00000080686	Tprg1l	214	23551.1	10	130	0	0.5935	0.0002729	32.133	0	tumor protein p63 regulated 1-like
Pre-frontal cortex	Streptozocin	ENSRNOT00000002221	Pcp4	94	10704.3	5	57	0	0.2872	0.0002724	15.412	0	Purkinje cell protein 4
Pre-frontal cortex	Streptozocin	ENSRNOT00000000201	Mpst	297	32901.4	12	180	154	0.4916	0.0002723	28.469	10	mercaptopyruvate sulfurtransferase
Pre-frontal cortex	Streptozocin	ENSRNOT00000013997	Psmc5	406	45579	22	246	240	0.569	0.0002722	57.11	21	proteasome 26S subunit, ATPase 5
Pre-frontal cortex	Streptozocin	ENSRNOT00000081747	Rps8	208	24172.2	11	126	36	0.4808	0.0002722	26.941	3	ribosomal protein S8
Pre-frontal cortex	Streptozocin	ENSRNOT00000022878	Epb41l3	963	107004	50	583	6	0.5182	0.000272	125.241	1	erythrocyte membrane protein band 4.1-like 3
Pre-frontal cortex	Streptozocin	ENSRNOT00000061159	Pip5k1c	688	75548.1	30	415	6	0.4738	0.000271	82.95	1	phosphatidylinositol-4-phosphate 5-kinase type 1 gamma
Pre-frontal cortex	Streptozocin	Q62910-6	Synj1	1158	126070	51	698	0	0.4603	0.0002708	134.151	0	Synaptojanin-1, EC 3.1.3.36 (Synaptic inositol 1,4,5-trisphosphate 5-phosphatase 1)
Pre-frontal cortex	Streptozocin	ENSRNOT00000046453	RGD1561871	161	18590.5	7	97	0	0.3727	0.0002707	19.131	0	Similar to ribosomal protein S10
Pre-frontal cortex	Streptozocin	ENSRNOT00000066440	Cab39	196	23638.3	14	118	0	0.5918	0.0002705	25.847	0	calcium binding protein 39
Pre-frontal cortex	Streptozocin	ENSRNOT00000022828	Ppib	216	23769.5	12	130	125	0.5324	0.0002704	28.503	10	peptidylprolyl isomerase B
Pre-frontal cortex	Streptozocin	ENSRNOT00000093284	Dclk1	421	46410.5	18	253	4	0.5107	0.00027	53.405	1	doublecortin-like kinase 1
Pre-frontal cortex	Streptozocin	ENSRNOT00000073790	Sri	198	21592.2	14	119	119	0.5	0.00027	28.718	14	sorcin
Pre-frontal cortex	Streptozocin	ENSRNOT00000000673	Ppa1	198	22366.5	10	119	99	0.4293	0.00027	22.655	6	inorganic pyrophosphatase 1
Pre-frontal cortex	Streptozocin	Q05546	Tnr	1356	149258	62	815	0	0.4668	0.00027	177.286	0	tenascin R
Pre-frontal cortex	Streptozocin	ENSRNOT00000091789	Myo5a	1746	202922	101	1049	0	0.5338	0.0002699	250.885	0	myosin VA
Pre-frontal cortex	Streptozocin	ENSRNOT00000091896	Sars1	536	61306.3	24	322	0	0.4254	0.0002699	61.092	0	seryl-tRNA synthetase 1
Pre-frontal cortex	Streptozocin	ENSRNOT00000016450	Psmc2	433	48585.1	25	260	1	0.6074	0.0002698	61.101	1	proteasome 26S subunit, ATPase 2
Pre-frontal cortex	Streptozocin	ENSRNOT00000077687	Pcbp2	365	38537.6	19	219	34	0.6055	0.0002696	51.06	2	poly(rC) binding protein 2
Pre-frontal cortex	Streptozocin	ENSRNOT00000004776	Rufy3	469	52855.1	27	281	19	0.5586	0.0002692	62.882	1	RUN and FYVE domain containing 3
Pre-frontal cortex	Streptozocin	P14942	Gsta4	222	25475.4	12	133	112	0.4595	0.0002692	25.481	10	glutathione S-transferase alpha 4
Pre-frontal cortex	Streptozocin	P68403	Prkcb	671	76683	43	402	0	0.5738	0.0002692	103.671	0	protein kinase C, beta
Pre-frontal cortex	Streptozocin	ENSRNOT00000020322	Idh1	414	46686.5	24	248	220	0.5507	0.0002691	52.071	21	isocitrate dehydrogenase (NADP(+)) 1
Pre-frontal cortex	Streptozocin	Q923W4	Hdgfl3	202	22414.9	10	121	55	0.396	0.0002691	23.246	6	HDGF like 3
Pre-frontal cortex	Streptozocin	ENSRNOT00000000553	Pfdn6	127	14470.7	8	76	29	0.4409	0.0002689	19.882	2	prefoldin subunit 6
Pre-frontal cortex	Streptozocin	P15791-5	Camk2d	478	54138.5	37	286	0	0.7071	0.0002688	82.608	0	Calcium/calmodulin-dependent protein kinase type II subunit delta, CaM kinase II subunit delta, CaMK-II subunit delta, EC 2.7.11.17
Pre-frontal cortex	Streptozocin	Q63347	Psmc2	433	48526.1	24	259	0	0.5912	0.0002687	59.922	0	proteasome 26S subunit, ATPase 2
Pre-frontal cortex	Streptozocin	ENSRNOT00000081948	Oxr1	873	96944	51	522	44	0.5922	0.0002686	131.066	3	oxidation resistance 1
Pre-frontal cortex	Streptozocin	P11730-2	Camk2g	517	58437.7	36	309	0	0.6112	0.0002685	84.861	0	Calcium/calmodulin-dependent protein kinase type II subunit gamma, CaM kinase II subunit gamma, CaMK-II subunit gamma, EC 2.7.11.17
Pre-frontal cortex	Streptozocin	ENSRNOT00000076009	Ly6h	139	14613.1	5	83	0	0.3453	0.0002683	13.165	0	lymphocyte antigen 6 family member H
Pre-frontal cortex	Streptozocin	ENSRNOT00000089758	Hist1h2an	129	14008.9	6	77	0	0.4264	0.0002682	14.44	0	histone cluster 1, H2an
Pre-frontal cortex	Streptozocin	Q68A21	Purb	315	33379.6	18	188	167	0.6667	0.0002681	43.42	15	purine rich element binding protein B
Pre-frontal cortex	Streptozocin	ENSRNOT00000015545	Aldh6a1	535	57692.5	29	319	0	0.6598	0.0002679	78.114	0	aldehyde dehydrogenase 6 family, member A1
Pre-frontal cortex	Streptozocin	Q02253	Aldh6a1	535	57752.6	29	319	0	0.6598	0.0002679	78.114	0	aldehyde dehydrogenase 6 family, member A1
Pre-frontal cortex	Streptozocin	ENSRNOT00000028785	Rtn3	940	101436	48	560	491	0.55	0.0002677	124.929	41	reticulon 3
Pre-frontal cortex	Streptozocin	ENSRNOT00000001115	Ddx39b	428	48986	22	255	129	0.5724	0.0002677	56.552	10	DExD-box helicase 39B
Pre-frontal cortex	Streptozocin	ENSRNOT00000066885	Ubb	225	25370.7	12	134	0	0.5244	0.0002676	26.31	0	ubiquitin B
Pre-frontal cortex	Streptozocin	ENSRNOT00000007876	AC136661.1	121	12899.9	7	72	0	0.3554	0.0002673	17.045	0	S5 DRBM domain-containing protein
Pre-frontal cortex	Streptozocin	ENSRNOT00000084940	Oxr1	804	89504.2	48	478	0	0.5883	0.0002671	120.607	0	oxidation resistance 1
Pre-frontal cortex	Streptozocin	ENSRNOT00000029435	Hsp90b1	804	92824.4	40	478	0	0.4565	0.0002671	103.153	0	heat shock protein 90 beta family member 1
Pre-frontal cortex	Streptozocin	Q66HD0	Hsp90b1	804	92695.4	40	478	0	0.4565	0.0002671	103.153	0	heat shock protein 90 beta family member 1
Pre-frontal cortex	Streptozocin	P28075	Psmb5	263	28549.2	14	156	0	0.5057	0.0002665	36.729	0	proteasome 20S subunit beta 5
Pre-frontal cortex	Streptozocin	Q4FZT6	Hist3h2a	130	14094.9	6	77	0	0.4231	0.0002661	14.44	0	histone cluster 3, H2a
Pre-frontal cortex	Streptozocin	Q07009	Capn2	700	79850.8	33	414	215	0.5343	0.0002657	87.394	17	calpain 2
Pre-frontal cortex	Streptozocin	ENSRNOT00000077579	Acly	1100	120448	57	650	0	0.5727	0.0002655	142.34	0	ATP citrate lyase
Pre-frontal cortex	Streptozocin	P16638	Acly	1100	120541	57	650	0	0.5727	0.0002655	142.34	0	ATP citrate lyase
Pre-frontal cortex	Streptozocin	ENSRNOT00000023447	Acly	1101	120686	57	650	0	0.5722	0.0002652	142.34	0	ATP citrate lyase
Pre-frontal cortex	Streptozocin	ENSRNOT00000025325	Wdr7	1488	163068	68	878	49	0.623	0.0002651	192.419	3	WD repeat domain 7
Pre-frontal cortex	Streptozocin	ENSRNOT00000078122	Rab11b	217	24369.4	13	128	0	0.47	0.000265	31.934	0	RAB11B, member RAS oncogene family
Pre-frontal cortex	Streptozocin	P11507-2	Atp2a2	997	109592	55	588	0	0.5426	0.000265	147.424	0	Sarcoplasmic/endoplasmic reticulum calcium ATPase 2, SERCA2, SR Ca(2+)-ATPase 2, EC 7.2.2.10 (Calcium pump 2) (Calcium-transporting ATPase sarcoplasmic reticulum type, slow twitch skeletal muscle isoform) (Endoplasmic reticulum class 1/2 Ca(2+) ATPase)
Pre-frontal cortex	Streptozocin	ENSRNOT00000001816	Aldh2	519	56462.7	30	306	0	0.7091	0.0002649	73.548	0	aldehyde dehydrogenase 2 family member
Pre-frontal cortex	Streptozocin	ENSRNOT00000066197	Dmxl2	3056	341060	148	1802	1766	0.5363	0.0002649	388.112	143	Dmx-like 2
Pre-frontal cortex	Streptozocin	P11884	Aldh2	519	56434.7	30	306	0	0.7091	0.0002649	73.548	0	aldehyde dehydrogenase 2 family member
Pre-frontal cortex	Streptozocin	A9UMV8	H2aj	129	14018.9	5	76	0	0.4264	0.0002647	13.495	0	H2A.J histone
Pre-frontal cortex	Streptozocin	ENSRNOT00000078705	Prkcb	652	74465	39	384	0	0.5644	0.0002646	90.858	0	protein kinase C, beta
Pre-frontal cortex	Streptozocin	P04692-8	Tpm1 Alpha-tm Tpma	248	28682.6	13	146	0	0.2742	0.0002645	31.968	0	Tropomyosin alpha-1 chain (Alpha-tropomyosin) (Tropomyosin-1)
Pre-frontal cortex	Streptozocin	P63326	Rps10	165	18885.8	7	97	0	0.3636	0.0002641	19.131	0	ribosomal protein S10
Pre-frontal cortex	Streptozocin	ENSRNOT00000043950	NA	165	18854.8	7	97	0	0.3636	0.0002641	19.131	0	NA
Pre-frontal cortex	Streptozocin	P41499-1	Ptpn11	597	68397.3	29	351	10	0.5444	0.0002641	74.425	1	Tyrosine-protein phosphatase non-receptor type 11, EC 3.1.3.48 (Protein-tyrosine phosphatase 1D, PTP-1D) (Protein-tyrosine phosphatase SYP) (SH-PTP2, SHP-2, Shp2)
Pre-frontal cortex	Streptozocin	ENSRNOT00000043172	Acly	1091	119619	56	640	0	0.5646	0.0002636	140.402	0	ATP citrate lyase
Pre-frontal cortex	Streptozocin	Q9JIX3	Fhit	150	17318.8	10	88	88	0.6667	0.0002636	25.49	10	fragile histidine triad diadenosine triphosphatase
Pre-frontal cortex	Streptozocin	P16638-2	Acly	1091	119609	56	640	0	0.5646	0.0002636	140.402	0	ATP-citrate synthase, EC 2.3.3.8 (ATP-citrate (pro-S-)-lyase) (Citrate cleavage enzyme)
Pre-frontal cortex	Streptozocin	ENSRNOT00000079156	Psmd11	500	55869.4	27	293	0	0.526	0.0002633	68.477	0	proteasome 26S subunit, non-ATPase 11
Pre-frontal cortex	Streptozocin	P53678	Ap3m2	418	46826.4	22	245	14	0.5646	0.0002633	57.044	1	adaptor related protein complex 3 subunit mu 2
Pre-frontal cortex	Streptozocin	ENSRNOT00000075425	Ahsa1	338	38062.2	21	198	198	0.5858	0.0002632	49.775	21	activator of Hsp90 ATPase activity 1
Pre-frontal cortex	Streptozocin	ENSRNOT00000087805	Dpy30	99	11187.8	4	58	21	0.4545	0.0002632	8.042	2	dpy-30 histone methyltransferase complex regulatory subunit
Pre-frontal cortex	Streptozocin	ENSRNOT00000091292	Rnh1	492	54080.3	22	288	0	0.6565	0.000263	62.995	0	ribonuclease/angiogenin inhibitor 1
Pre-frontal cortex	Streptozocin	ENSRNOT00000018599	Nefl	542	61280	30	317	251	0.476	0.0002628	70.772	23	neurofilament light
Pre-frontal cortex	Streptozocin	ENSRNOT00000073005	Srsf1	248	27709.8	18	145	145	0.4435	0.0002627	37.589	18	serine and arginine rich splicing factor 1
Pre-frontal cortex	Streptozocin	P0C170	Hist1h2ah	130	14092.9	5	76	0	0.4231	0.0002627	13.495	0	histone cluster 1 H2A family member H
Pre-frontal cortex	Streptozocin	Q00728	H2ac1	130	14257	5	76	0	0.4231	0.0002627	13.495	0	H2A clustered histone 1
Pre-frontal cortex	Streptozocin	P0CC09	Hist2h2aa3	130	14068.9	5	76	0	0.4231	0.0002627	13.495	0	histone cluster 2 H2A family member A3
Pre-frontal cortex	Streptozocin	P0C169	H2a1c	130	14078.9	5	76	0	0.4231	0.0002627	13.495	0	Histone H2A type 1-C
Pre-frontal cortex	Streptozocin	P02262	H2a1a	130	14050.9	5	76	0	0.4231	0.0002627	13.495	0	Histone H2A type 1
Pre-frontal cortex	Streptozocin	ENSRNOT00000065895	Myh10	1976	228839	110	1153	4	0.5202	0.0002622	305.106	1	myosin heavy chain 10
Pre-frontal cortex	Streptozocin	ENSRNOT00000059190	Hnrnph1	449	49150.4	23	262	0	0.5234	0.0002622	59.47	0	heterogeneous nuclear ribonucleoprotein H1
Pre-frontal cortex	Streptozocin	ENSRNOT00000091236	Septin8	441	50991.9	23	257	0	0.4943	0.0002618	56.26	0	septin 8
Pre-frontal cortex	Streptozocin	ENSRNOT00000074446	Sub1	127	14414.4	10	74	65	0.4488	0.0002618	22.425	9	SUB1 regulator of transcription
Pre-frontal cortex	Streptozocin	ENSRNOT00000033976	Gpd1l	225	24025.8	19	131	100	0	0.0002616	43.775	14	glycerol-3-phosphate dehydrogenase 1-like
Pre-frontal cortex	Streptozocin	ENSRNOT00000068102	Dctn1	1281	141838	63	745	0	0.5683	0.0002613	181.786	0	dynactin subunit 1
Pre-frontal cortex	Streptozocin	ENSRNOT00000072262	Rtn1	502	54150.6	22	292	6	0.4741	0.0002613	62.061	2	reticulon 1
Pre-frontal cortex	Streptozocin	P10960	Psap	554	61065.5	31	322	20	0.3718	0.0002611	71.156	3	prosaposin
Pre-frontal cortex	Streptozocin	Q9Z1N4	Bpnt1	308	33135	20	179	0	0.6948	0.0002611	47.055	0	3'(2'), 5'-bisphosphate nucleotidase 1
Pre-frontal cortex	Streptozocin	ENSRNOT00000072429	Hk1	885	98480.6	52	514	7	0.4859	0.0002609	127.314	1	hexokinase 1
Pre-frontal cortex	Streptozocin	ENSRNOT00000006443	Rtn4	1163	126306	52	675	0	0.546	0.0002608	155.03	0	reticulon 4
Pre-frontal cortex	Streptozocin	Q9JK11	Rtn4	1163	126292	52	675	0	0.546	0.0002608	155.03	0	reticulon 4
Pre-frontal cortex	Streptozocin	Q05546-2	Tnr	1266	139372	56	735	0	0.4692	0.0002608	161.785	0	Tenascin-R, TN-R (Janusin) (Neural recognition molecule J1-160/180) (Restrictin)
Pre-frontal cortex	Streptozocin	ENSRNOT00000000886	Coro1c	474	53126	24	275	263	0.4768	0.0002607	57.241	22	coronin 1C
Pre-frontal cortex	Streptozocin	ENSRNOT00000088364	Pip5k1c	636	69595.1	26	369	0	0.4607	0.0002607	73.672	0	phosphatidylinositol-4-phosphate 5-kinase type 1 gamma
Pre-frontal cortex	Streptozocin	ENSRNOT00000088705	Prkar2a	423	48097.1	19	245	0	0.4752	0.0002602	50.078	0	protein kinase cAMP-dependent type II regulatory subunit alpha
Pre-frontal cortex	Streptozocin	ENSRNOT00000004283	Psmd12	456	52884.5	24	264	264	0.5746	0.0002601	57.56	24	proteasome 26S subunit, non-ATPase 12
Pre-frontal cortex	Streptozocin	ENSRNOT00000005033	Acot9	439	50392.9	24	254	254	0.5421	0.0002599	53.147	24	acyl-CoA thioesterase 9
Pre-frontal cortex	Streptozocin	ENSRNOT00000078175	Dctn1	1263	139736	62	730	0	0.5598	0.0002597	178.24	0	dynactin subunit 1
Pre-frontal cortex	Streptozocin	ENSRNOT00000088885	Hint3	130	14290	9	75	0	0.7769	0.0002592	23.361	0	histidine triad nucleotide binding protein 3
Pre-frontal cortex	Streptozocin	ENSRNOT00000012725	Tf	935	102570	49	539	0	0.4364	0.000259	129.922	0	transferrin
Pre-frontal cortex	Streptozocin	ENSRNOT00000084613	Usp14	458	52242.2	28	264	0	0.6725	0.000259	67.415	0	ubiquitin specific peptidase 14
Pre-frontal cortex	Streptozocin	ENSRNOT00000020749	Spr	262	28092.5	10	151	151	0.5687	0.0002589	28.458	10	sepiapterin reductase
Pre-frontal cortex	Streptozocin	P13471	Rps14	151	16230.5	9	87	57	0.6358	0.0002589	24.121	6	ribosomal protein S14
Pre-frontal cortex	Streptozocin	P41499	Ptpn11	593	67972.1	28	341	0	0.5278	0.0002584	72.67	0	protein tyrosine phosphatase, non-receptor type 11
Pre-frontal cortex	Streptozocin	ENSRNOT00000027407	Ctsd	407	44575.8	20	234	15	0.4447	0.0002583	49.566	2	cathepsin D
Pre-frontal cortex	Streptozocin	ENSRNOT00000030485	Ube2k	200	22374.6	12	115	103	0.615	0.0002583	30.072	11	ubiquitin-conjugating enzyme E2K
Pre-frontal cortex	Streptozocin	ENSRNOT00000020443	Anp32a	247	28529.3	17	142	0	0.4251	0.0002583	37.316	0	acidic nuclear phosphoprotein 32 family member A
Pre-frontal cortex	Streptozocin	P49911	Anp32a	247	28529.3	17	142	0	0.4251	0.0002583	37.316	0	acidic nuclear phosphoprotein 32 family member A
Pre-frontal cortex	Streptozocin	P15791-7	Camk2d	498	56239.7	37	286	0	0.6787	0.000258	82.608	0	Calcium/calmodulin-dependent protein kinase type II subunit delta, CaM kinase II subunit delta, CaMK-II subunit delta, EC 2.7.11.17
Pre-frontal cortex	Streptozocin	Q9JLT0	Myh10	1976	228806	107	1134	0	0.501	0.0002578	297.115	0	myosin heavy chain 10
Pre-frontal cortex	Streptozocin	Q91Y78	Uchl3	230	26089	12	132	40	0.7261	0.0002578	32.745	4	ubiquitin C-terminal hydrolase L3
Pre-frontal cortex	Streptozocin	ENSRNOT00000032337	LOC684970	319	34107.2	17	183	0	0.3793	0.0002577	41.396	0	similar to Heterogeneous nuclear ribonucleoprotein A1 (Helix-destabilizing protein) (Single-strand RNA-binding protein) (hnRNP core protein A1) (HDP)
Pre-frontal cortex	Streptozocin	ENSRNOT00000014532	Dync1li1	523	56617.1	29	300	0	0.587	0.0002577	70.303	0	dynein cytoplasmic 1 light intermediate chain 1
Pre-frontal cortex	Streptozocin	Q9QXU8	Dync1li1	523	56739.2	29	300	0	0.587	0.0002577	70.303	0	dynein cytoplasmic 1 light intermediate chain 1
Pre-frontal cortex	Streptozocin	P15791-2	Camk2d	499	56392.6	37	286	0	0.6774	0.0002575	82.608	0	Calcium/calmodulin-dependent protein kinase type II subunit delta, CaM kinase II subunit delta, CaMK-II subunit delta, EC 2.7.11.17
Pre-frontal cortex	Streptozocin	ENSRNOT00000016418	Prkcb	672	76647.1	40	385	0	0.5714	0.0002574	92.288	0	protein kinase C, beta
Pre-frontal cortex	Streptozocin	ENSRNOT00000044477	Hnrnpu	798	87659.6	45	457	24	0.4712	0.0002573	110.771	3	heterogeneous nuclear ribonucleoprotein U
Pre-frontal cortex	Streptozocin	P10687	Plcb1	1216	138239	63	696	176	0.6003	0.0002572	162.827	12	phospholipase C beta 1
Pre-frontal cortex	Streptozocin	ENSRNOT00000023478	RGD1304884	407	46228.2	19	233	233	0.4226	0.0002572	46.224	19	similar to RIKEN cDNA 6430548M08
Pre-frontal cortex	Streptozocin	ENSRNOT00000075159	Rnf14	479	54052.8	24	274	274	0.5073	0.000257	56.11	24	ring finger protein 14
Pre-frontal cortex	Streptozocin	ENSRNOT00000007175	Cst3	140	15408.8	6	80	80	0.4214	0.0002567	16.931	6	cystatin C
Pre-frontal cortex	Streptozocin	ENSRNOT00000038281	Cops7a	275	30183	11	157	0	0.4655	0.0002565	30.654	0	COP9 signalosome subunit 7A
Pre-frontal cortex	Streptozocin	ENSRNOT00000064290	Ppp2r1b	601	65946.5	28	343	16	0.2895	0.0002564	64.326	1	protein phosphatase 2 scaffold subunit A beta
Pre-frontal cortex	Streptozocin	ENSRNOT00000080012	Scamp5	235	26033	10	134	6	0.3574	0.0002562	25.728	1	secretory carrier membrane protein 5
Pre-frontal cortex	Streptozocin	ENSRNOT00000086340	Vapa	272	30285.5	13	155	0	0.4522	0.000256	27.246	0	VAMP associated protein A
Pre-frontal cortex	Streptozocin	ENSRNOT00000026581	Cops8	209	23202.9	10	119	119	0.7751	0.0002558	27.712	10	COP9 signalosome subunit 8
Pre-frontal cortex	Streptozocin	Q4V8B0-3	Oxr1 C7	216	24416.1	11	123	0	0.5417	0.0002558	31.431	0	Oxidation resistance protein 1 (Protein C7)
Pre-frontal cortex	Streptozocin	Q9ERH3-2	Wdr7 Trag	1457	160072	65	829	0	0.6143	0.0002556	182.237	0	WD repeat-containing protein 7 (TGF-beta resistance-associated protein TRAG)
Pre-frontal cortex	Streptozocin	P08082-2	Cltb	211	23088.2	14	120	0	0.2986	0.0002555	25.353	0	Clathrin light chain B, Lcb
Pre-frontal cortex	Streptozocin	ENSRNOT00000050070	Mapt	686	71703.8	30	390	0	0.3367	0.0002554	80.22	0	microtubule-associated protein tau
Pre-frontal cortex	Streptozocin	ENSRNOT00000006542	Sec14l2	403	46157.6	17	229	11	0.5806	0.0002553	41.139	2	SEC14-like lipid binding 2
Pre-frontal cortex	Streptozocin	Q05140	Snap91	915	93442.3	51	520	0	0.3639	0.0002553	118.989	0	synaptosome associated protein 91
Pre-frontal cortex	Streptozocin	Q5I6B8	Pip5k1c	688	75529.1	28	391	0	0.4302	0.0002553	76.511	0	phosphatidylinositol-4-phosphate 5-kinase type 1 gamma
Pre-frontal cortex	Streptozocin	ENSRNOT00000054958	P4hb	509	56897.7	29	289	278	0.5697	0.0002551	66.382	28	prolyl 4-hydroxylase subunit beta
Pre-frontal cortex	Streptozocin	ENSRNOT00000043571	NA	171	19542.3	11	97	0	0.4678	0.0002549	29.109	0	NA
Pre-frontal cortex	Streptozocin	ENSRNOT00000080032	Prkcg	697	78289.1	46	395	305	0.6399	0.0002546	109.067	39	protein kinase C, gamma
Pre-frontal cortex	Streptozocin	ENSRNOT00000022874	Cops7a	277	30349.1	11	157	0	0.4621	0.0002546	30.654	0	COP9 signalosome subunit 7A
Pre-frontal cortex	Streptozocin	P97546-3	Nptn Sdfr1 Sdr1	277	30798.6	13	157	0	0.3105	0.0002546	31.231	0	Neuroplastin (Glycoprotein 55/65, gp55/65) (Stromal cell-derived receptor 1, SDR-1)
Pre-frontal cortex	Streptozocin	ENSRNOT00000023010	LOC679881	632	67324.3	28	358	0	0.4003	0.0002545	74.265	0	similar to dihydrolipoamide S-acetyltransferase (E2 component of pyruvate dehydrogenase complex)
Pre-frontal cortex	Streptozocin	ENSRNOT00000028060	Rpl27	136	15769.7	7	77	77	0.4265	0.0002544	15.282	7	ribosomal protein L27
Pre-frontal cortex	Streptozocin	Q9Z2L9-5	Ndrg4 Bdm1 Ndr4	371	40708.2	18	210	0	0.593	0.0002543	50.576	0	Protein NDRG4 (Brain development-related molecule 1)
Pre-frontal cortex	Streptozocin	P11507	Atp2a2	1043	114676	56	589	1	0.5254	0.0002537	149	1	ATPase sarcoplasmic/endoplasmic reticulum Ca2+ transporting 2
Pre-frontal cortex	Streptozocin	ENSRNOT00000081084	Eif4h	248	27289.4	15	140	140	0.4234	0.0002536	34.948	15	eukaryotic translation initiation factor 4H
Pre-frontal cortex	Streptozocin	ENSRNOT00000076995	Septin4	360	41824.3	20	203	0	0.5056	0.0002533	45.54	0	septin 4
Pre-frontal cortex	Streptozocin	ENSRNOT00000010300	Actr10	417	46166.2	18	235	235	0.6187	0.0002532	45.785	18	actin related protein 10
Pre-frontal cortex	Streptozocin	ENSRNOT00000051554	Vamp3	103	11455	5	58	2	0.3883	0.000253	16.905	1	vesicle-associated membrane protein 3
Pre-frontal cortex	Streptozocin	P70600-2	Ptk2b Fak2 Pyk2	238	26772.9	15	134	0	0.7017	0.000253	36.069	0	Protein-tyrosine kinase 2-beta, EC 2.7.10.2 (Calcium-dependent tyrosine kinase, CADTK) (Calcium-regulated non-receptor proline-rich tyrosine kinase) (Cell adhesion kinase beta, CAK-beta, CAKB) (Focal adhesion kinase 2, FADK 2) (Proline-rich tyrosine kinase 2)
Pre-frontal cortex	Streptozocin	ENSRNOT00000015843	Blvra	295	33468.5	15	166	0	0.5627	0.0002528	36.527	0	biliverdin reductase A
Pre-frontal cortex	Streptozocin	ENSRNOT00000074473	LOC102550314	96	11063.9	6	54	0	0.2604	0.0002527	13.278	0	uncharacterized LOC102550314
Pre-frontal cortex	Streptozocin	P19944	Rplp1	114	11472.7	9	64	34	0.8246	0.0002522	22.961	4	ribosomal protein lateral stalk subunit P1
Pre-frontal cortex	Streptozocin	ENSRNOT00000022573	Dnaja2	412	45698.6	21	231	29	0.6092	0.0002519	47.761	1	DnaJ heat shock protein family (Hsp40) member A2
Pre-frontal cortex	Streptozocin	P15791-3	Camk2d	510	57654.3	37	286	0	0.6627	0.0002519	82.608	0	Calcium/calmodulin-dependent protein kinase type II subunit delta, CaM kinase II subunit delta, CaMK-II subunit delta, EC 2.7.11.17
Pre-frontal cortex	Streptozocin	P15791-6	Camk2d	512	57770.4	38	287	0	0.7031	0.0002518	84.078	0	Calcium/calmodulin-dependent protein kinase type II subunit delta, CaM kinase II subunit delta, CaMK-II subunit delta, EC 2.7.11.17
Pre-frontal cortex	Streptozocin	ENSRNOT00000038919	RGD1565131	204	24010	11	114	0	0.3186	0.0002511	22.78	0	similar to ribosomal protein L15
Pre-frontal cortex	Streptozocin	P31399	Atp5pd	161	18733.6	9	90	66	0.6335	0.0002511	23.845	6	ATP synthase peripheral stalk subunit d
Pre-frontal cortex	Streptozocin	ENSRNOT00000029791	Rps15	145	17011.2	6	81	56	0.4069	0.000251	17.16	4	ribosomal protein S15
Pre-frontal cortex	Streptozocin	ENSRNOT00000076701	Septin4	326	37457.1	17	182	0	0.4417	0.0002508	39.621	0	septin 4
Pre-frontal cortex	Streptozocin	ENSRNOT00000025878	Ap3d1	1204	135563	56	671	671	0.5382	0.0002504	145.997	56	adaptor related protein complex 3 subunit delta 1
Pre-frontal cortex	Streptozocin	ENSRNOT00000035482	AABR07011698.1	370	40638.8	18	206	3	0.327	0.0002501	40.778	1	Phosphoserine transaminase, EC 2.6.1.52
Pre-frontal cortex	Streptozocin	ENSRNOT00000067998	Acyp2	124	13618.1	4	69	0	0.3629	0.00025	9.599	0	acylphosphatase 2
Pre-frontal cortex	Streptozocin	ENSRNOT00000056015	Capza1	286	32871.3	17	159	110	0.6154	0.0002498	43.095	14	capping actin protein of muscle Z-line subunit alpha 1
Pre-frontal cortex	Streptozocin	ENSRNOT00000020537	Usp14	493	55922.9	30	274	10	0.6673	0.0002497	73.58	2	ubiquitin specific peptidase 14
Pre-frontal cortex	Streptozocin	P34067	Psmb4	263	29160.4	8	146	0	0.403	0.0002494	24.81	0	Proteasome subunit beta type-4 (Macropain beta chain) (Multicatalytic endopeptidase complex beta chain) (Proteasome beta chain) (Proteasome chain 3, RN3)
Pre-frontal cortex	Streptozocin	ENSRNOT00000043480	NA	283	30197.2	18	157	0	0.4523	0.0002492	40.27	0	NA
Pre-frontal cortex	Streptozocin	ENSRNOT00000088921	Bpnt1	323	35011	20	179	0	0.6625	0.000249	47.055	0	3'(2'), 5'-bisphosphate nucleotidase 1
Pre-frontal cortex	Streptozocin	ENSRNOT00000019174	Gnaq	359	42113.3	22	199	0	0.6128	0.000249	50.754	0	G protein subunit alpha q
Pre-frontal cortex	Streptozocin	ENSRNOT00000023527	Sh3glb2	343	37783	18	190	0	0.3994	0.0002489	43.274	0	SH3 domain-containing GRB2-like endophilin B2
Pre-frontal cortex	Streptozocin	P28023	Dctn1	1280	141824	61	709	0	0.5375	0.0002489	173.464	0	dynactin subunit 1
Pre-frontal cortex	Streptozocin	ENSRNOT00000090288	Tpm1	284	32642.7	16	157	2	0.3944	0.0002484	37.435	1	tropomyosin 1
Pre-frontal cortex	Streptozocin	ENSRNOT00000006570	Rtcb	505	55195.9	20	279	103	0.5109	0.0002482	53.722	6	RNA 2',3'-cyclic phosphate and 5'-OH ligase
Pre-frontal cortex	Streptozocin	P15791-4	Camk2d	519	58493.8	37	286	0	0.6513	0.0002476	82.608	0	Calcium/calmodulin-dependent protein kinase type II subunit delta, CaM kinase II subunit delta, CaMK-II subunit delta, EC 2.7.11.17
Pre-frontal cortex	Streptozocin	Q8VHV7-3	Hnrnph1 Hnrph Hnrph1	372	40562.1	17	205	0	0.4812	0.0002476	47.474	0	Heterogeneous nuclear ribonucleoprotein H, hnRNP H (Ratsg1) [Cleaved into: Heterogeneous nuclear ribonucleoprotein H, N-terminally processed ]
Pre-frontal cortex	Streptozocin	Q99MS0	Sec14l2	403	46118.6	17	222	4	0.5806	0.0002475	41.36	2	SEC14-like protein 2 (Alpha-tocopherol-associated protein, TAP) (Squalene transfer protein) (Supernatant protein factor, SPF)
Pre-frontal cortex	Streptozocin	Q6AYK6	Cacybp	229	26506.7	11	126	125	0.5808	0.0002472	29.248	10	calcyclin binding protein
Pre-frontal cortex	Streptozocin	P18421	Psmb1	240	26444.3	18	132	0	0.6458	0.0002471	37.885	0	proteasome 20S subunit beta 1
Pre-frontal cortex	Streptozocin	ENSRNOT00000047836	Rap1a	184	20955.7	12	101	26	0.6957	0.0002466	34.932	3	RAP1A, member of RAS oncogene family
Pre-frontal cortex	Streptozocin	ENSRNOT00000019350	Ap1m1	423	48508	19	232	232	0.5508	0.0002464	45.055	19	adaptor related protein complex 1 subunit mu 1
Pre-frontal cortex	Streptozocin	P52873	Pc	1178	129677	54	645	0	0.5467	0.000246	142.197	0	pyruvate carboxylase
Pre-frontal cortex	Streptozocin	Q66HD0-2	Hsp90b1 Grp94 Tra1	643	74143.6	31	352	0	0.4588	0.0002459	80.683	0	Endoplasmin (94 kDa glucose-regulated protein, GRP-94) (Heat shock protein 90 kDa beta member 1)
Pre-frontal cortex	Streptozocin	Q9Z2L9-2	Ndrg4 Bdm1 Ndr4	384	42051	19	210	0	0.599	0.0002457	50.736	0	Protein NDRG4 (Brain development-related molecule 1)
Pre-frontal cortex	Streptozocin	Q63569	Psmc3	439	49111.4	21	240	0	0.6014	0.0002456	57.474	0	proteasome 26S subunit, ATPase 3
Pre-frontal cortex	Streptozocin	ENSRNOT00000082257	Ncam1	1016	108464	42	555	64	0.4016	0.0002454	117.12	8	neural cell adhesion molecule 1
Pre-frontal cortex	Streptozocin	ENSRNOT00000018646	Snrpd1	119	13255.4	5	65	65	0.5462	0.0002454	12.829	5	small nuclear ribonucleoprotein D1 polypeptide
Pre-frontal cortex	Streptozocin	ENSRNOT00000085894	Tpm1	293	33514	16	160	0	0.4061	0.0002453	38.211	0	tropomyosin 1
Pre-frontal cortex	Streptozocin	P04692-6	Tpm1 Alpha-tm Tpma	284	32692.7	15	155	0	0.3486	0.0002452	35.789	0	Tropomyosin alpha-1 chain (Alpha-tropomyosin) (Tropomyosin-1)
Pre-frontal cortex	Streptozocin	ENSRNOT00000017252	Adh4	374	39532.2	18	204	11	0.5775	0.0002451	46.572	1	alcohol dehydrogenase 4 (class II), pi polypeptide
Pre-frontal cortex	Streptozocin	ENSRNOT00000014415	Lypla2	231	24772.7	13	126	126	0.5152	0.0002451	35.677	13	lysophospholipase 2
Pre-frontal cortex	Streptozocin	P17074	Rps19l2	145	16057.6	11	79	9	0.4759	0.0002448	21.82	2	ribosomal protein S19-like2
Pre-frontal cortex	Streptozocin	Q06647	Atp5po	213	23364.8	11	116	107	0.5728	0.0002447	28.961	10	ATP synthase peripheral stalk subunit OSCP
Pre-frontal cortex	Streptozocin	Q9JKE3	Scamp5	235	26063	9	128	0	0.3064	0.0002447	23.831	0	secretory carrier membrane protein 5
Pre-frontal cortex	Streptozocin	ENSRNOT00000026949	Matr3	845	94425.7	43	460	17	0.5148	0.0002446	108.643	1	matrin 3
Pre-frontal cortex	Streptozocin	ENSRNOT00000018190	Rala	206	23519.9	12	112	65	0.5583	0.0002443	28.119	6	RAS like proto-oncogene A
Pre-frontal cortex	Streptozocin	ENSRNOT00000083093	Tom1l2	528	57893	26	287	161	0.5455	0.0002442	70.893	13	target of myb1 like 2 membrane trafficking protein
Pre-frontal cortex	Streptozocin	ENSRNOT00000015757	Psmc3	442	49499.5	21	240	0	0.5973	0.000244	57.474	0	proteasome 26S subunit, ATPase 3
Pre-frontal cortex	Streptozocin	P22734-2	Comt	221	24713.4	13	120	0	0.6561	0.000244	32.259	0	Catechol O-methyltransferase, EC 2.1.1.6
Pre-frontal cortex	Streptozocin	ENSRNOT00000000696	Psap	557	61394.7	28	302	0	0.3627	0.0002436	64.333	0	prosaposin
Pre-frontal cortex	Streptozocin	ENSRNOT00000016442	Prkcb	670	76504	38	363	0	0.5284	0.0002434	87.185	0	protein kinase C, beta
Pre-frontal cortex	Streptozocin	P04644	Rps17	135	15482.3	6	73	42	0.4889	0.0002429	17.877	2	ribosomal protein S17
Pre-frontal cortex	Streptozocin	P82471	Gnaq	359	42099.3	21	194	0	0.6072	0.0002428	48.733	0	G protein subunit alpha q
Pre-frontal cortex	Streptozocin	M0RC99	Rab5a	215	23591.8	12	116	47	0.6279	0.0002424	29.437	6	RAB5A, member RAS oncogene family
Pre-frontal cortex	Streptozocin	ENSRNOT00000078061	Hnrnpu	803	87858.9	42	433	0	0.4321	0.0002423	101.228	0	heterogeneous nuclear ribonucleoprotein U
Pre-frontal cortex	Streptozocin	ENSRNOT00000092252	Rpl3	403	46088.8	18	217	180	0.4169	0.0002419	45.286	15	ribosomal protein L3
Pre-frontal cortex	Streptozocin	P15791	Camk2d	533	60024.5	38	287	0	0.6754	0.0002419	84.078	0	calcium/calmodulin-dependent protein kinase II delta
Pre-frontal cortex	Streptozocin	Q5FVJ0-2	Rufy3 Ripx	487	54953.1	26	262	0	0.4846	0.0002417	58.151	0	Protein RUFY3 (RUN and FYVE domain-containing protein 3) (Rap2-interacting protein x, RIPx) (Single axon-regulated protein, Singar)
Pre-frontal cortex	Streptozocin	P24268	Ctsd	407	44633.9	18	219	0	0.4079	0.0002417	45.006	0	Cathepsin D, EC 3.4.23.5 [Cleaved into: Cathepsin D 12 kDa light chain; Cathepsin D 9 kDa light chain; Cathepsin D 34 kDa heavy chain; Cathepsin D 30 kDa heavy chain ]
Pre-frontal cortex	Streptozocin	ENSRNOT00000019561	Dctn3	186	21081.3	9	100	93	0.4731	0.0002415	21.584	8	dynactin subunit 3
Pre-frontal cortex	Streptozocin	Q4V8B0	Oxr1	839	92734.6	44	451	0	0.5364	0.0002415	110.839	0	oxidation resistance 1
Pre-frontal cortex	Streptozocin	ENSRNOT00000034472	Dync1li2	497	54692.6	25	267	0	0.6821	0.0002414	61.112	0	dynein, cytoplasmic 1 light intermediate chain 2
Pre-frontal cortex	Streptozocin	ENSRNOT00000015598	Rab11a	216	24360.4	12	116	0	0.4352	0.0002413	29.95	0	RAB11a, member RAS oncogene family
Pre-frontal cortex	Streptozocin	ENSRNOT00000017494	Ndrg4	391	42919.5	18	210	0	0.5627	0.0002413	50.576	0	NDRG family member 4
Pre-frontal cortex	Streptozocin	Q9Z2L9-6	Ndrg4 Bdm1 Ndr4	391	42930.5	18	210	0	0.5627	0.0002413	50.576	0	Protein NDRG4 (Brain development-related molecule 1)
Pre-frontal cortex	Streptozocin	ENSRNOT00000012091	Nptn	393	43886.2	17	211	54	0.3435	0.0002412	43.302	4	neuroplastin
Pre-frontal cortex	Streptozocin	ENSRNOT00000022849	Epb41l3	1105	122359	52	593	0	0.4679	0.0002411	131.557	0	erythrocyte membrane protein band 4.1-like 3
Pre-frontal cortex	Streptozocin	ENSRNOT00000044226	Septin4	379	43771.2	20	203	0	0.4802	0.0002406	45.54	0	septin 4
Pre-frontal cortex	Streptozocin	ENSRNOT00000003891	Septin9	478	54039.4	23	256	19	0.4707	0.0002406	54.711	2	Septin-9
Pre-frontal cortex	Streptozocin	P61227	Rap2b	183	20473.2	12	98	28	0.6284	0.0002406	31.317	3	RAP2B, member of RAS oncogene family
Pre-frontal cortex	Streptozocin	ENSRNOT00000021048	Myl12a	172	19864.5	10	92	0	0.3488	0.0002403	24.308	0	myosin light chain 12A
Pre-frontal cortex	Streptozocin	ENSRNOT00000009923	Strap	350	38414	17	187	187	0.6286	0.00024	42.858	17	serine/threonine kinase receptor associated protein
Pre-frontal cortex	Streptozocin	ENSRNOT00000009649	Psmc6	403	45750	21	215	215	0.531	0.0002397	53.465	21	proteasome 26S subunit, ATPase 6
Pre-frontal cortex	Streptozocin	ENSRNOT00000031871	Nt5dc3	546	63068	25	291	291	0.5275	0.0002394	62.457	25	5'-nucleotidase domain containing 3
Pre-frontal cortex	Streptozocin	ENSRNOT00000006407	Crk	304	33806	15	162	20	0.4868	0.0002394	35.509	2	CRK proto-oncogene, adaptor protein
Pre-frontal cortex	Streptozocin	Q9JHL4-3	Dbnl Sh3p7	432	48206.4	19	230	0	0.456	0.0002392	50.633	0	Drebrin-like protein (Actin-binding protein 1, Abp1) (SH3 domain-containing protein 7)
Pre-frontal cortex	Streptozocin	Q64122	Myl9	171	19692.4	10	91	0	0.3333	0.0002391	26.513	0	myosin light chain 9
Pre-frontal cortex	Streptozocin	Q9JHL4-2	Dbnl Sh3p7	433	48293.4	19	230	0	0.455	0.0002386	50.633	0	Drebrin-like protein (Actin-binding protein 1, Abp1) (SH3 domain-containing protein 7)
Pre-frontal cortex	Streptozocin	Q64428	Hadha	763	82594.5	29	405	405	0.4875	0.0002385	78.011	29	hydroxyacyl-CoA dehydrogenase trifunctional multienzyme complex subunit alpha
Pre-frontal cortex	Streptozocin	P29315	Rnh1	456	49924.1	21	242	0	0.6601	0.0002384	58.996	0	ribonuclease/angiogenin inhibitor 1
Pre-frontal cortex	Streptozocin	ENSRNOT00000030173	NA	200	22888.8	7	106	0	0.255	0.0002381	16.006	0	NA
Pre-frontal cortex	Streptozocin	ENSRNOT00000027445	Myl9	172	19823.4	10	91	0	0.3314	0.0002377	26.513	0	myosin light chain 9
Pre-frontal cortex	Streptozocin	ENSRNOT00000048490	Ddx5	615	69177.8	33	325	200	0.5447	0.0002374	75.55	20	DEAD-box helicase 5
Pre-frontal cortex	Streptozocin	ENSRNOT00000011105	Ipo9	456	49119	27	241	241	0	0.0002374	61.477	27	importin 9
Pre-frontal cortex	Streptozocin	Q9JLJ3	Aldh9a1	494	53600	26	261	0	0.6174	0.0002374	66.151	0	aldehyde dehydrogenase 9 family, member A1
Pre-frontal cortex	Streptozocin	ENSRNOT00000017375	Dbnl	436	48564.5	19	230	0	0.4518	0.000237	50.633	0	drebrin-like
Pre-frontal cortex	Streptozocin	P52555	Erp29	260	28538.9	13	137	137	0.5	0.0002367	28.295	13	endoplasmic reticulum protein 29
Pre-frontal cortex	Streptozocin	P37285-3	Klc1 Klc Kns2	551	62697.8	27	290	5	0.5717	0.0002365	70.878	1	Kinesin light chain 1, KLC 1
Pre-frontal cortex	Streptozocin	ENSRNOT00000049822	Tardbp	285	32109.1	12	150	150	0.5509	0.0002365	32.015	12	TAR DNA binding protein
Pre-frontal cortex	Streptozocin	Q07266-2	Dbn1	661	72538.9	30	348	0	0.4448	0.0002365	80.92	0	Drebrin (Developmentally-regulated brain protein)
Pre-frontal cortex	Streptozocin	ENSRNOT00000015318	Ppp2r2a	447	51627.5	17	235	105	0.5347	0.0002362	48.349	9	protein phosphatase 2, regulatory subunit B, alpha
Pre-frontal cortex	Streptozocin	P37285-2	Klc1 Klc Kns2	542	61584.1	26	285	0	0.559	0.0002362	69.354	0	Kinesin light chain 1, KLC 1
Pre-frontal cortex	Streptozocin	P41498	Acp1	158	18121.8	12	83	0	0.6582	0.000236	29.236	0	acid phosphatase 1
Pre-frontal cortex	Streptozocin	ENSRNOT00000005611	Aldh9a1	497	53997.2	26	261	0	0.6137	0.0002359	66.151	0	aldehyde dehydrogenase 9 family, member A1
Pre-frontal cortex	Streptozocin	ENSRNOT00000086959	Rap2a rCG_36946	183	20611.3	12	96	26	0.6284	0.0002357	31.209	3	Ras-related protein Rap-2
Pre-frontal cortex	Streptozocin	P43244	Matr3	845	94370.7	42	443	0	0.4935	0.0002355	105.421	0	matrin 3
Pre-frontal cortex	Streptozocin	ENSRNOT00000024493	Tpm1	296	33661.1	15	155	0	0.3345	0.0002353	35.789	0	tropomyosin 1
Pre-frontal cortex	Streptozocin	Q6AYD3-2	Pa2g4	340	37887.4	19	178	0	0.7029	0.0002352	42.243	0	Proliferation-associated protein 2G4
Pre-frontal cortex	Streptozocin	ENSRNOT00000076050	Septin4	386	41331.2	19	202	0	0	0.0002351	44.125	0	septin 4
Pre-frontal cortex	Streptozocin	O09175	Rnpep	650	72555.3	30	340	14	0.4569	0.000235	71.426	1	arginyl aminopeptidase
Pre-frontal cortex	Streptozocin	ENSRNOT00000047772	AC136661.1	222	24318.1	13	116	0	0.4459	0.0002348	31.35	0	40S ribosomal protein S2
Pre-frontal cortex	Streptozocin	ENSRNOT00000075978	Dync1li2	511	56144.4	25	267	0	0.6634	0.0002347	61.112	0	dynein, cytoplasmic 1 light intermediate chain 2
Pre-frontal cortex	Streptozocin	Q8VHV7-2	Hnrnph1 Hnrph Hnrph1	429	47016.3	19	224	0	0.4592	0.0002346	51.952	0	Heterogeneous nuclear ribonucleoprotein H, hnRNP H (Ratsg1) [Cleaved into: Heterogeneous nuclear ribonucleoprotein H, N-terminally processed ]
Pre-frontal cortex	Streptozocin	ENSRNOT00000083850	Psmb7	253	27227.7	12	132	0	0.6561	0.0002344	31.937	0	proteasome 20S subunit beta 7
Pre-frontal cortex	Streptozocin	ENSRNOT00000021387	Hint2	163	17351.2	6	85	80	0.4601	0.0002343	19.358	5	histidine triad nucleotide binding protein 2
Pre-frontal cortex	Streptozocin	ENSRNOT00000016195	Ppa2	304	35006.4	15	158	19	0.6711	0.0002335	40.838	2	inorganic pyrophosphatase 2
Pre-frontal cortex	Streptozocin	ENSRNOT00000051414	Ndrg4	404	44262.3	19	210	0	0.5693	0.0002335	50.736	0	NDRG family member 4
Pre-frontal cortex	Streptozocin	Q9Z2L9-3	Ndrg4 Bdm1 Ndr4	404	44273.3	19	210	0	0.5693	0.0002335	50.736	0	Protein NDRG4 (Brain development-related molecule 1)
Pre-frontal cortex	Streptozocin	ENSRNOT00000029456	Eef1d	281	31292.9	13	146	0	0.5694	0.0002334	37.568	0	eukaryotic translation elongation factor 1 delta
Pre-frontal cortex	Streptozocin	ENSRNOT00000076014	Ly6h	160	16936.3	5	83	0	0.3	0.0002331	13.165	0	lymphocyte antigen 6 family member H
Pre-frontal cortex	Streptozocin	Q9EPH8	Pabpc1	636	70637.9	32	330	169	0.3915	0.0002331	81.639	16	poly(A) binding protein, cytoplasmic 1
Pre-frontal cortex	Streptozocin	ENSRNOT00000049942	Canx	591	67194.6	32	306	302	0.5584	0.0002326	79.304	30	calnexin
Pre-frontal cortex	Streptozocin	ENSRNOT00000042827	Sh3bgrl	114	12774.3	6	59	59	0.7193	0.0002325	14.881	6	SH3 domain binding glutamate-rich protein like
Pre-frontal cortex	Streptozocin	ENSRNOT00000042984	Mapt	752	78489.3	29	389	0	0.3072	0.0002324	79.073	0	microtubule-associated protein tau
Pre-frontal cortex	Streptozocin	ENSRNOT00000025193	Adsl	484	54798.9	21	250	250	0.5537	0.0002321	60.288	21	adenylosuccinate lyase
Pre-frontal cortex	Streptozocin	ENSRNOT00000049255	Rtraf	244	28134.7	8	126	0	0.4139	0.000232	23.744	0	RNA transcription, translation and transport factor
Pre-frontal cortex	Streptozocin	ENSRNOT00000015935	Klc1	552	62795.8	26	285	0	0.5489	0.000232	69.354	0	kinesin light chain 1
Pre-frontal cortex	Streptozocin	P97697	Impa1	277	30473.4	18	143	0	0.4657	0.0002319	39.241	0	inositol monophosphatase 1
Pre-frontal cortex	Streptozocin	ENSRNOT00000007287	Acp1	161	18458	12	83	0	0.646	0.0002316	29.236	0	acid phosphatase 1
Pre-frontal cortex	Streptozocin	ENSRNOT00000025675	Ap3m2	417	46727.4	19	215	0	0.4772	0.0002316	47.911	0	adaptor related protein complex 3 subunit mu 2
Pre-frontal cortex	Streptozocin	ENSRNOT00000079380	Nudc	332	38370.3	18	171	171	0.5392	0.0002314	40.696	18	nuclear distribution C, dynein complex regulator
Pre-frontal cortex	Streptozocin	ENSRNOT00000081014	Nars1	404	46290.7	18	208	0	0.495	0.0002313	50.759	0	asparaginyl-tRNA synthetase 1
Pre-frontal cortex	Streptozocin	ENSRNOT00000080887	G6pd	515	59319.8	31	265	252	0.5417	0.0002312	65.477	30	glucose-6-phosphate dehydrogenase
Pre-frontal cortex	Streptozocin	D3ZQD3	Ogdhl	1010	114546	45	519	355	0.5188	0.0002309	104.538	30	oxoglutarate dehydrogenase L
Pre-frontal cortex	Streptozocin	ENSRNOT00000073321	Fasn	2505	272460	117	1285	1284	0.5689	0.0002305	297.315	116	fatty acid synthase
Pre-frontal cortex	Streptozocin	ENSRNOT00000082769	Psmd14	310	34536.5	15	159	159	0.6258	0.0002304	33.314	15	proteasome 26S subunit, non-ATPase 14
Pre-frontal cortex	Streptozocin	ENSRNOT00000021817	Rcn2	320	37391.9	16	164	164	0.6125	0.0002303	41.396	16	reticulocalbin 2
Pre-frontal cortex	Streptozocin	Q62848-3	Arfgap1 Arf1gap	283	31242.3	12	145	0	0.5159	0.0002302	33.46	0	ADP-ribosylation factor GTPase-activating protein 1, ARF GAP 1 (ADP-ribosylation factor 1 GTPase-activating protein, ARF1 GAP) (ARF1-directed GTPase-activating protein)
Pre-frontal cortex	Streptozocin	ENSRNOT00000082267	Arfgap1	403	44316.9	18	206	0	0.5509	0.0002297	49.661	0	ADP-ribosylation factor GTPase activating protein 1
Pre-frontal cortex	Streptozocin	ENSRNOT00000014383	Trappc3	180	20271.1	7	92	92	0.4222	0.0002296	13.673	7	trafficking protein particle complex subunit 3
Pre-frontal cortex	Streptozocin	ENSRNOT00000055615	Ank2	3997	436765	170	2039	0	0.5111	0.0002292	472.202	0	ankyrin 2
Pre-frontal cortex	Streptozocin	ENSRNOT00000035048	Ube2v1	147	16326.2	8	75	3	0.5782	0.0002292	18.747	1	ubiquitin conjugating enzyme E2 V1
Pre-frontal cortex	Streptozocin	ENSRNOT00000080470	Ank2	3996	436693	169	2033	0	0.508	0.0002286	469.405	0	ankyrin 2
Pre-frontal cortex	Streptozocin	P37285	Klc1	560	63687.2	26	285	0	0.5411	0.0002286	69.354	0	kinesin light chain 1
Pre-frontal cortex	Streptozocin	ENSRNOT00000004808	Dynlt3	116	12871.2	6	59	59	0.7328	0.0002285	18.287	6	dynein light chain Tctex-type 3
Pre-frontal cortex	Streptozocin	ENSRNOT00000024098	Actn2	894	103750	52	454	166	0.5481	0.0002282	131.283	28	actinin alpha 2
Pre-frontal cortex	Streptozocin	Q8VHV7	Hnrnph1	449	49139.3	21	228	0	0.4833	0.0002281	55.569	0	heterogeneous nuclear ribonucleoprotein H1
Pre-frontal cortex	Streptozocin	Q64537	Capns1	270	28533.9	10	137	137	0.4593	0.000228	25.716	10	calpain, small subunit 1
Pre-frontal cortex	Streptozocin	Q6QIX3-2	Slc30a3	339	36807.9	16	172	0	0.41	0.000228	32.822	0	Zinc transporter 3, ZnT-3 (Solute carrier family 30 member 3)
Pre-frontal cortex	Streptozocin	ENSRNOT00000083116	Bcan	371	40488.3	18	188	0	0.3531	0.0002277	41.214	0	brevican
Pre-frontal cortex	Streptozocin	ENSRNOT00000087432	Pc	1277	139898	55	646	1	0.5043	0.0002273	143.004	1	pyruvate carboxylase
Pre-frontal cortex	Streptozocin	P05765	Rps21	83	9103.5	6	42	28	0.3976	0.0002273	13.884	4	ribosomal protein S21
Pre-frontal cortex	Streptozocin	Q03555-6	Gphn Gph	736	79680	35	372	0	0.5489	0.0002271	86.964	0	Gephyrin (Putative glycine receptor-tubulin linker protein) [Includes: Molybdopterin adenylyltransferase, MPT adenylyltransferase, EC 2.7.7.75 (Domain G); Molybdopterin molybdenumtransferase, MPT Mo-transferase, EC 2.10.1.1 (Domain E) ]
Pre-frontal cortex	Streptozocin	ENSRNOT00000078266	Homer1	190	21880.2	11	96	0	0.5105	0.000227	27.642	0	homer scaffold protein 1
Pre-frontal cortex	Streptozocin	ENSRNOT00000038429	AC107446.2	285	30653.6	14	144	8	0.3193	0.000227	30.841	1	Gp_dh_N domain-containing protein
Pre-frontal cortex	Streptozocin	Q5EB77	Rab18	206	22943.6	11	104	101	0.6262	0.0002268	31.669	10	RAB18, member RAS oncogene family
Pre-frontal cortex	Streptozocin	ENSRNOT00000044827	Add3	700	78179.5	31	353	39	0.48	0.0002266	78.313	3	adducin 3
Pre-frontal cortex	Streptozocin	ENSRNOT00000034790	AC093995.1	165	18667.7	13	83	2	0.3515	0.000226	23.121	1	Destrin (Actin-depolymerizing factor)
Pre-frontal cortex	Streptozocin	ENSRNOT00000016376	Cyfip1	1253	145146	64	630	3	0.4134	0.0002259	137.807	2	cytoplasmic FMR1 interacting protein 1
Pre-frontal cortex	Streptozocin	ENSRNOT00000015828	Cbx3	183	20780.3	8	92	46	0.5574	0.0002259	21.744	4	chromobox 3
Pre-frontal cortex	Streptozocin	ENSRNOT00000092741	Klc1	568	64637.7	26	285	0	0.5335	0.0002254	69.354	0	kinesin light chain 1
Pre-frontal cortex	Streptozocin	Q9JHW0	Psmb7	277	29890.2	13	139	7	0.6318	0.0002254	33.834	1	proteasome 20S subunit beta 7
Pre-frontal cortex	Streptozocin	ENSRNOT00000009198	Rnpep	650	72624.3	29	326	0	0.42	0.0002253	69.216	0	arginyl aminopeptidase
Pre-frontal cortex	Streptozocin	ENSRNOT00000037255	Ank2	3931	429848	166	1969	0	0.5052	0.000225	462.788	0	ankyrin 2
Pre-frontal cortex	Streptozocin	ENSRNOT00000017794	Pfdn5	154	17297	7	77	77	0.5	0.0002246	18.501	7	prefoldin subunit 5
Pre-frontal cortex	Streptozocin	ENSRNOT00000003787	Ptges3	160	18691.4	6	80	47	0.45	0.0002246	17.025	3	prostaglandin E synthase 3
Pre-frontal cortex	Streptozocin	ENSRNOT00000014458	Pithd1	118	13721.6	5	59	59	0.5339	0.0002246	14.912	5	PITH domain containing 1
Pre-frontal cortex	Streptozocin	ENSRNOT00000009994	Rac2	192	21409.1	12	96	0	0.4844	0.0002246	27.955	0	Rac family small GTPase 2
Pre-frontal cortex	Streptozocin	P43425	Gng7	68	7500.9	3	34	0	0.5441	0.0002246	8.628	0	G protein subunit gamma 7
Pre-frontal cortex	Streptozocin	ENSRNOT00000047163	Hmgb1 AABR07035218.1	106	12289.1	7	53	0	0.3208	0.0002246	14.254	0	High mobility group protein B1
Pre-frontal cortex	Streptozocin	P01836	Kaca	106	11706.6	5	53	0	0.2642	0.0002246	14.393	0	Ig kappa chain C region, A allele
Pre-frontal cortex	Streptozocin	P19332-2	Mapt Mtapt Tau	686	71712.8	28	343	0	0.3367	0.0002246	72.57	0	Microtubule-associated protein tau (Neurofibrillary tangle protein) (Paired helical filament-tau, PHF-tau)
Pre-frontal cortex	Streptozocin	ENSRNOT00000089534	Ank2	3963	433235	167	1977	0	0.5039	0.0002241	464.94	0	ankyrin 2
Pre-frontal cortex	Streptozocin	Q62848-2	Arfgap1 Arf1gap	378	41291.7	17	188	0	0.5608	0.0002234	47.725	0	ADP-ribosylation factor GTPase-activating protein 1, ARF GAP 1 (ADP-ribosylation factor 1 GTPase-activating protein, ARF1 GAP) (ARF1-directed GTPase-activating protein)
Pre-frontal cortex	Streptozocin	ENSRNOT00000092150	Mpp2	552	61508.8	29	274	250	0.5779	0.000223	71.379	26	membrane palmitoylated protein 2
Pre-frontal cortex	Streptozocin	ENSRNOT00000013900	Arfgap1	415	45396.6	18	206	0	0.5349	0.000223	49.661	0	ADP-ribosylation factor GTPase activating protein 1
Pre-frontal cortex	Streptozocin	ENSRNOT00000019574	Txndc17	123	14064.9	4	61	61	0.4472	0.0002228	11.483	4	thioredoxin domain containing 17
Pre-frontal cortex	Streptozocin	ENSRNOT00000068524	Tsn	228	26136.7	10	113	113	0.4167	0.0002227	27.155	10	translin
Pre-frontal cortex	Streptozocin	ENSRNOT00000026648	Timm13	95	10432.9	6	47	44	0.6105	0.0002223	13.246	5	translocase of inner mitochondrial membrane 13
Pre-frontal cortex	Streptozocin	O35796	C1qbp	279	30959.5	8	138	138	0.319	0.0002222	23.799	8	complement C1q binding protein
Pre-frontal cortex	Streptozocin	Q8VHK7	Hdgf	237	26453.6	11	117	2	0.6034	0.0002218	22.712	2	heparin binding growth factor
Pre-frontal cortex	Streptozocin	ENSRNOT00000019737	Clta	225	24025.8	13	111	21	0	0.0002216	29.814	2	clathrin, light chain A
Pre-frontal cortex	Streptozocin	ENSRNOT00000001844	Rph3a	684	75737.7	33	337	6	0.4985	0.0002214	82.395	1	rabphilin 3A
Pre-frontal cortex	Streptozocin	ENSRNOT00000026893	Gng7	69	7632	3	34	0	0.5362	0.0002214	8.628	0	G protein subunit gamma 7
Pre-frontal cortex	Streptozocin	Q03555-4	Gphn Gph	755	81744.1	35	372	0	0.5351	0.0002214	86.964	0	Gephyrin (Putative glycine receptor-tubulin linker protein) [Includes: Molybdopterin adenylyltransferase, MPT adenylyltransferase, EC 2.7.7.75 (Domain G); Molybdopterin molybdenumtransferase, MPT Mo-transferase, EC 2.10.1.1 (Domain E) ]
Pre-frontal cortex	Streptozocin	ENSRNOT00000089255	LOC303448	335	36114.1	20	165	4	0.1791	0.0002213	40.235	2	similar to glyceraldehyde-3-phosphate dehydrogenase
Pre-frontal cortex	Streptozocin	ENSRNOT00000008126	Slc30a3	388	41853.4	18	191	19	0.3969	0.0002212	36.847	2	solute carrier family 30 member 3
Pre-frontal cortex	Streptozocin	Q6MG60	Ddah2	285	29651.3	16	140	126	0.793	0.0002207	40.99	14	dimethylarginine dimethylaminohydrolase 2
Pre-frontal cortex	Streptozocin	P32736-2	Opcml Obcam	338	37299.9	15	166	0	0.4497	0.0002207	41.49	0	Opioid-binding protein/cell adhesion molecule, OBCAM, OPCML, Opioid-binding cell adhesion molecule
Pre-frontal cortex	Streptozocin	ENSRNOT00000028064	Slc17a7	560	61607.2	27	275	0	0.3607	0.0002206	65.9	0	solute carrier family 17 member 7
Pre-frontal cortex	Streptozocin	ENSRNOT00000093255	Nrcam	1098	121054	50	539	0	0.4809	0.0002205	123.718	0	neuronal cell adhesion molecule
Pre-frontal cortex	Streptozocin	ENSRNOT00000006637	Syt2	422	47189.2	22	207	0	0.4336	0.0002204	49.935	0	synaptotagmin 2
Pre-frontal cortex	Streptozocin	P29101	Syt2	422	47161.2	22	207	0	0.4336	0.0002204	49.935	0	synaptotagmin 2
Pre-frontal cortex	Streptozocin	O35824	Dnaja2	412	45718.5	20	202	0	0.5485	0.0002203	44.226	0	DnaJ homolog subfamily A member 2 (RDJ2)
Pre-frontal cortex	Streptozocin	ENSRNOT00000024978	Cpne6	557	61691.6	33	273	236	0.6302	0.0002202	76.352	28	copine 6
Pre-frontal cortex	Streptozocin	ENSRNOT00000026030	Ap3b2	1082	119050	58	530	457	0.5018	0.0002201	137.829	50	adaptor related protein complex 3 subunit beta 2
Pre-frontal cortex	Streptozocin	ENSRNOT00000010386	Glod4	298	33228.5	18	146	146	0.5503	0.0002201	40.906	18	glyoxalase domain containing 4
Pre-frontal cortex	Streptozocin	ENSRNOT00000087961	Nap1l4	386	43871.4	15	189	3	0.5052	0.00022	43.31	1	nucleosome assembly protein 1-like 4
Pre-frontal cortex	Streptozocin	Q63564	Sv2b	683	77433.2	26	334	0	0.3324	0.0002197	60.308	0	synaptic vesicle glycoprotein 2b
Pre-frontal cortex	Streptozocin	ENSRNOT00000015084	Sv2b rCG_24899	683	77391.1	26	334	0	0.3324	0.0002197	60.308	0	Synaptic vesicle glycoprotein 2B (Synaptic vesicle glycoprotein 2b, isoform CRA_c)
Pre-frontal cortex	Streptozocin	ENSRNOT00000086616	NA	127	14886.2	5	62	0	0.2677	0.0002193	12.552	0	NA
Pre-frontal cortex	Streptozocin	Q03555-2	Gphn Gph	762	82545.6	35	372	0	0.5302	0.0002193	86.964	0	Gephyrin (Putative glycine receptor-tubulin linker protein) [Includes: Molybdopterin adenylyltransferase, MPT adenylyltransferase, EC 2.7.7.75 (Domain G); Molybdopterin molybdenumtransferase, MPT Mo-transferase, EC 2.10.1.1 (Domain E) ]
Pre-frontal cortex	Streptozocin	Q03555-5	Gphn Gph	763	82598.4	35	372	0	0.5295	0.000219	86.964	0	Gephyrin (Putative glycine receptor-tubulin linker protein) [Includes: Molybdopterin adenylyltransferase, MPT adenylyltransferase, EC 2.7.7.75 (Domain G); Molybdopterin molybdenumtransferase, MPT Mo-transferase, EC 2.10.1.1 (Domain E) ]
Pre-frontal cortex	Streptozocin	ENSRNOT00000048998	Gabarapl2	117	13640.1	5	57	47	0.359	0.0002189	11.129	4	GABA type A receptor associated protein like 2
Pre-frontal cortex	Streptozocin	ENSRNOT00000074357	Apoa1	259	30025.2	15	126	126	0.5753	0.0002186	34.144	15	apolipoprotein A1
Pre-frontal cortex	Streptozocin	ENSRNOT00000093147	Nrcam	1086	119696	49	528	0	0.4788	0.0002184	121.686	0	neuronal cell adhesion molecule
Pre-frontal cortex	Streptozocin	ENSRNOT00000026710	Gnai3	354	40478.2	17	172	18	0.3757	0.0002183	34.78	3	G protein subunit alpha i3
Pre-frontal cortex	Streptozocin	ENSRNOT00000025887	Psme1	249	28599	14	121	8	0.5622	0.0002183	31.042	1	proteasome activator subunit 1
Pre-frontal cortex	Streptozocin	ENSRNOT00000017234	Hdgf	237	26405.6	9	115	0	0.3418	0.000218	19.303	0	heparin binding growth factor
Pre-frontal cortex	Streptozocin	ENSRNOT00000051184	Plcb1	1072	121986	51	520	0	0.5737	0.0002179	128.258	0	phospholipase C beta 1
Pre-frontal cortex	Streptozocin	ENSRNOT00000025669	Mt3	66	6785.6	3	32	32	0.4545	0.0002178	6.089	3	metallothionein 3
Pre-frontal cortex	Streptozocin	ENSRNOT00000055038	Arfgap1	425	46647.2	18	206	0	0.5224	0.0002178	49.661	0	ADP-ribosylation factor GTPase activating protein 1
Pre-frontal cortex	Streptozocin	P63095	Gnas	394	45616.9	17	191	0	0.4924	0.0002178	38.986	0	GNAS complex locus
Pre-frontal cortex	Streptozocin	ENSRNOT00000057641	Tpm1	293	33653.2	14	142	0	0.3481	0.0002177	34.15	0	tropomyosin 1
Pre-frontal cortex	Streptozocin	ENSRNOT00000075708	Gnb5	351	38623.6	15	170	0	0.49	0.0002176	40.289	0	G protein subunit beta 5
Pre-frontal cortex	Streptozocin	Q03555	Gphn	768	83194.9	35	372	0	0.526	0.0002176	86.964	0	gephyrin
Pre-frontal cortex	Streptozocin	P47709	Rph3a	684	75766.7	32	331	0	0.4868	0.0002174	81.194	0	rabphilin 3A
Pre-frontal cortex	Streptozocin	ENSRNOT00000025165	Ahcyl2	612	66756.5	25	296	98	0.4183	0.0002173	59.41	9	adenosylhomocysteinase-like 2
Pre-frontal cortex	Streptozocin	ENSRNOT00000011963	Gnb5	352	38715.6	15	170	0	0.4886	0.000217	40.289	0	G protein subunit beta 5
Pre-frontal cortex	Streptozocin	P61203	Cops2	443	51546	19	214	26	0.456	0.000217	45.135	2	COP9 signalosome subunit 2
Pre-frontal cortex	Streptozocin	Q4KM49	Yars1	528	59060	29	255	0	0.5587	0.000217	62.279	0	tyrosyl-tRNA synthetase 1
Pre-frontal cortex	Streptozocin	ENSRNOT00000019554	Anxa5	319	35732.3	14	154	0	0.4514	0.0002169	34.574	0	annexin A5
Pre-frontal cortex	Streptozocin	ENSRNOT00000002579	Ranbp1	203	23563.7	8	98	98	0.5517	0.0002169	20.193	8	RAN binding protein 1
Pre-frontal cortex	Streptozocin	ENSRNOT00000084299	Pde1a	437	49892.1	20	211	0	0.6064	0.0002169	49.66	0	phosphodiesterase 1A
Pre-frontal cortex	Streptozocin	P14668	Anxa5	319	35704.3	14	154	0	0.4514	0.0002169	34.574	0	annexin A5
Pre-frontal cortex	Streptozocin	Q03555-3	Gphn Gph	772	83566.8	35	372	0	0.5233	0.0002165	86.964	0	Gephyrin (Putative glycine receptor-tubulin linker protein) [Includes: Molybdopterin adenylyltransferase, MPT adenylyltransferase, EC 2.7.7.75 (Domain G); Molybdopterin molybdenumtransferase, MPT Mo-transferase, EC 2.10.1.1 (Domain E) ]
Pre-frontal cortex	Streptozocin	P62882	Gnb5	353	38688.6	15	170	0	0.4873	0.0002164	40.289	0	G protein subunit beta 5
Pre-frontal cortex	Streptozocin	ENSRNOT00000066007	Dnm2	860	97175.5	47	414	0	0.3267	0.0002163	93.36	0	dynamin 2
Pre-frontal cortex	Streptozocin	ENSRNOT00000089590	Adap1	374	43380.8	22	180	0	0.4893	0.0002162	46.166	0	ArfGAP with dual PH domains 1
Pre-frontal cortex	Streptozocin	ENSRNOT00000088459	Cyfip1	1251	144822	60	602	0	0.3853	0.0002162	129.749	0	cytoplasmic FMR1 interacting protein 1
Pre-frontal cortex	Streptozocin	D3ZQG6	Trim2	744	81358.1	35	358	4	0.5591	0.0002162	96.575	1	tripartite motif-containing 2
Pre-frontal cortex	Streptozocin	P32736	Opcml	345	38025.4	15	166	0	0.4406	0.0002162	41.49	0	opioid binding protein/cell adhesion molecule-like
Pre-frontal cortex	Streptozocin	ENSRNOT00000003414	Rap2c	183	20713.4	11	88	12	0.5792	0.000216	27.138	1	RAP2C, member of RAS oncogene family
Pre-frontal cortex	Streptozocin	Q62785	Pdap1	181	20574.5	7	87	87	0.4254	0.000216	18.924	7	PDGFA associated protein 1
Pre-frontal cortex	Streptozocin	ENSRNOT00000054862	Nap1l4	387	43997.6	14	186	0	0.4341	0.0002159	40.385	0	nucleosome assembly protein 1-like 4
Pre-frontal cortex	Streptozocin	ENSRNOT00000090547	Pde1a	439	49942.2	20	211	0	0.6036	0.0002159	49.66	0	phosphodiesterase 1A
Pre-frontal cortex	Streptozocin	Q9JHL4-4	Dbnl Sh3p7	431	48077.3	17	207	0	0.4246	0.0002158	46.029	0	Drebrin-like protein (Actin-binding protein 1, Abp1) (SH3 domain-containing protein 7)
Pre-frontal cortex	Streptozocin	ENSRNOT00000025496	Bcan	883	95923.1	34	424	50	0.3715	0.0002157	86.304	4	brevican
Pre-frontal cortex	Streptozocin	ENSRNOT00000005329	Psmc1	440	49135.7	23	211	205	0.5591	0.0002154	54.921	22	proteasome 26S subunit, ATPase 1
Pre-frontal cortex	Streptozocin	Q63081	Pdia6	440	48125.3	14	211	0	0.4318	0.0002154	42.903	0	protein disulfide isomerase family A, member 6
Pre-frontal cortex	Streptozocin	ENSRNOT00000041683	AABR07060610.1	48	5092.5	2	23	0	0.3333	0.0002153	7.499	0	60S ribosomal protein L12
Pre-frontal cortex	Streptozocin	ENSRNOT00000012510	Dtd1	209	23361.9	11	100	23	0.6124	0.000215	28.602	2	D-aminoacyl-tRNA deacylase 1
Pre-frontal cortex	Streptozocin	P39052-3	Dnm2 Dyn2	866	97738.9	47	414	0	0.3245	0.0002148	93.36	0	Dynamin-2, EC 3.6.5.5
Pre-frontal cortex	Streptozocin	ENSRNOT00000007554	Vapb	243	26881	11	116	103	0.4979	0.0002145	29.513	10	VAMP associated protein B and C
Pre-frontal cortex	Streptozocin	ENSRNOT00000011784	Eci1	289	32226	13	138	0	0.4913	0.0002145	32.309	0	enoyl-CoA delta isomerase 1
Pre-frontal cortex	Streptozocin	P23965	Eci1 Dci	289	32216	13	138	0	0.4913	0.0002145	32.309	0	Enoyl-CoA delta isomerase 1, mitochondrial, MECI, EC 5.3.3.8 (3,2-trans-enoyl-CoA isomerase) (Delta(3),Delta(2)-enoyl-CoA isomerase, D3,D2-enoyl-CoA isomerase) (Dodecenoyl-CoA isomerase)
Pre-frontal cortex	Streptozocin	Q9JJ54-4	Hnrnpd Auf1 Hnrpd	285	30459	13	136	0	0.3053	0.0002144	29.704	0	Heterogeneous nuclear ribonucleoprotein D0, hnRNP D0 (AU-rich element RNA-binding protein 1)
Pre-frontal cortex	Streptozocin	P07340	Atp1b1	304	35160.9	18	145	30	0.3783	0.0002143	39.474	2	ATPase Na+/K+ transporting subunit beta 1
Pre-frontal cortex	Streptozocin	ENSRNOT00000065028	Dnm2	869	98108.1	47	414	0	0.3234	0.000214	93.36	0	dynamin 2
Pre-frontal cortex	Streptozocin	ENSRNOT00000022943	Calb2	271	31366.5	18	129	111	0.6162	0.0002139	41.647	16	calbindin 2
Pre-frontal cortex	Streptozocin	ENSRNOT00000027494	Hnrnpl	586	63905.2	26	279	0	0.5939	0.0002139	78.109	0	heterogeneous nuclear ribonucleoprotein L
Pre-frontal cortex	Streptozocin	ENSRNOT00000010947	Dnm2	870	98151.1	47	414	0	0.323	0.0002138	93.36	0	dynamin 2
Pre-frontal cortex	Streptozocin	ENSRNOT00000023460	Map1b	2461	269459	107	1171	1102	0.51	0.0002138	302.77	99	microtubule-associated protein 1B
Pre-frontal cortex	Streptozocin	ENSRNOT00000031555	Hspb1	206	22775.5	14	98	21	0.7476	0.0002137	34.563	2	heat shock protein family B (small) member 1
Pre-frontal cortex	Streptozocin	ENSRNOT00000057034	Hnrnpl	623	67842.3	29	296	17	0.5971	0.0002135	84.755	3	heterogeneous nuclear ribonucleoprotein L
Pre-frontal cortex	Streptozocin	ENSRNOT00000087591	NA	543	59700	26	258	0	0.4273	0.0002135	59.463	0	NA
Pre-frontal cortex	Streptozocin	ENSRNOT00000055073	Prkca	636	72705.2	32	302	0	0.4324	0.0002133	78.167	0	protein kinase C, alpha
Pre-frontal cortex	Streptozocin	ENSRNOT00000085382	Trim2	746	81324.2	34	354	0	0.5322	0.0002132	94.779	0	tripartite motif-containing 2
Pre-frontal cortex	Streptozocin	ENSRNOT00000006578	Pa2g4	394	43611.1	21	187	0	0.6345	0.0002132	45.646	0	proliferation-associated 2G4
Pre-frontal cortex	Streptozocin	P24090	Ahsg	352	37940.2	8	167	77	0.3892	0.0002132	25.699	1	alpha-2-HS-glycoprotein
Pre-frontal cortex	Streptozocin	P62994-3	Grb2	59	6857.4	2	28	0	0.3729	0.0002132	5.687	0	Growth factor receptor-bound protein 2
Pre-frontal cortex	Streptozocin	P29314	Rps9	194	22559.5	13	92	92	0.3247	0.0002131	22.618	13	ribosomal protein S9
Pre-frontal cortex	Streptozocin	ENSRNOT00000074829	Pdia6	445	48711.6	14	211	0	0.427	0.000213	42.903	0	protein disulfide isomerase family A, member 6
Pre-frontal cortex	Streptozocin	ENSRNOT00000028260	Them4	230	26054.4	10	109	109	0.4087	0.0002129	21.82	10	thioesterase superfamily member 4
Pre-frontal cortex	Streptozocin	ENSRNOT00000065211	Hdgf	243	26992.9	9	115	0	0.3333	0.0002126	19.303	0	heparin binding growth factor
Pre-frontal cortex	Streptozocin	ENSRNOT00000016104	Acsbg1	721	80449.5	34	341	2	0.5035	0.0002125	91.572	1	acyl-CoA synthetase bubblegum family member 1
Pre-frontal cortex	Streptozocin	P63095-2	Gnas Gnas1	362	41773.8	16	171	0	0.5055	0.0002122	36.442	0	Guanine nucleotide-binding protein G(s) subunit alpha isoforms short (Adenylate cyclase-stimulating G alpha protein) (G-alpha-8)
Pre-frontal cortex	Streptozocin	P62853	Rps25	125	13715.7	6	59	34	0.296	0.0002121	13.655	3	ribosomal protein s25
Pre-frontal cortex	Streptozocin	ENSRNOT00000075099	Sult4a1	284	33014.3	16	134	130	0.5211	0.000212	33.178	14	sulfotransferase family 4A, member 1
Pre-frontal cortex	Streptozocin	ENSRNOT00000060168	Pls3	630	70686.1	27	297	0	0.5508	0.0002118	67.459	0	plastin 3
Pre-frontal cortex	Streptozocin	Q63598	Pls3	630	70617.1	27	297	0	0.5508	0.0002118	67.459	0	Plastin-3 (T-plastin)
Pre-frontal cortex	Streptozocin	ENSRNOT00000076026	Septin4	459	53031.6	21	216	0	0.427	0.0002114	49.089	0	septin 4
Pre-frontal cortex	Streptozocin	ENSRNOT00000081125	Pa2g4	353	39165.9	18	166	0	0.5921	0.0002113	38.451	0	proliferation-associated 2G4
Pre-frontal cortex	Streptozocin	Q62634-2	Slc17a7 Bnpi Vglut1	585	64273.5	27	275	0	0.3453	0.0002112	65.9	0	Vesicular glutamate transporter 1, VGluT1 (Brain-specific Na(+)-dependent inorganic phosphate cotransporter) (Solute carrier family 17 member 7)
Pre-frontal cortex	Streptozocin	P00173-2	Cyb5a Cyb5	100	11381.6	4	47	0	0.55	0.0002112	12.126	0	Cytochrome b5
Pre-frontal cortex	Streptozocin	P62856	Rps26	115	12989.1	5	54	54	0.313	0.000211	13.875	5	ribosomal protein S26
Pre-frontal cortex	Streptozocin	ENSRNOT00000016386	Csnk2a2	350	41157.1	18	164	121	0.5629	0.0002105	42.087	14	casein kinase 2 alpha 2
Pre-frontal cortex	Streptozocin	Q62847-2	Add3	673	75296.1	28	315	2	0.4324	0.0002103	70.078	1	Gamma-adducin (Adducin-like protein 70) (Protein kinase C-binding protein 35H)
Pre-frontal cortex	Streptozocin	ENSRNOT00000001327	Trappc5	188	20764.2	9	88	88	0.5	0.0002103	17.323	9	trafficking protein particle complex subunit 5
Pre-frontal cortex	Streptozocin	P61203-2	Cops2 Csn2 Trip15	402	46866.3	17	188	0	0.4453	0.0002101	40.722	0	COP9 signalosome complex subunit 2, SGN2, Signalosome subunit 2 (Alien homolog) (JAB1-containing signalosome subunit 2) (Thyroid receptor-interacting protein 15, TR-interacting protein 15, TRIP-15)
Pre-frontal cortex	Streptozocin	ENSRNOT00000059162	Nars1	507	58247.9	24	237	2	0.4398	0.00021	60.265	2	asparaginyl-tRNA synthetase 1
Pre-frontal cortex	Streptozocin	ENSRNOT00000029420	Nit2	276	30663.6	17	129	129	0.7754	0.00021	42.778	17	nitrilase family, member 2
Pre-frontal cortex	Streptozocin	Q641X8	Eif3el1	445	52169.4	19	208	208	0.5213	0.00021	40.613	19	eukaryotic translation initiation factor 3, subunit E-like 1
Pre-frontal cortex	Streptozocin	ENSRNOT00000081744	Kif5c	775	88569.8	38	362	0	0.5574	0.0002099	97.003	0	kinesin family member 5C
Pre-frontal cortex	Streptozocin	P62912	Rpl32	135	15831.8	6	63	31	0.3333	0.0002097	13.71	4	ribosomal protein L32
Pre-frontal cortex	Streptozocin	ENSRNOT00000047713	AABR07052519.1	90	9923.4	3	42	0	0.3778	0.0002097	7.742	0	60S ribosomal protein L7a
Pre-frontal cortex	Streptozocin	ENSRNOT00000043554	Arrb1	418	46972.2	20	195	137	0.4713	0.0002096	50	12	arrestin, beta 1
Pre-frontal cortex	Streptozocin	ENSRNOT00000012670	Fbxo2	296	33633.9	14	138	138	0.4392	0.0002095	39.413	14	F-box protein 2
Pre-frontal cortex	Streptozocin	ENSRNOT00000026551	Lsm7	103	11593	4	48	48	0.3981	0.0002094	8.237	4	LSM7 homolog, U6 small nuclear RNA and mRNA degradation associated
Pre-frontal cortex	Streptozocin	ENSRNOT00000055742	Kif21a	464	52472.4	20	216	0	0.5194	0.0002091	53.19	0	kinesin family member 21A
Pre-frontal cortex	Streptozocin	P39052-4	Dnm2 Dyn2	866	97667.8	46	403	0	0.3083	0.0002091	90.973	0	Dynamin-2, EC 3.6.5.5
Pre-frontal cortex	Streptozocin	ENSRNOT00000013762	Palm	383	41883	20	178	178	0.5901	0.0002088	56.125	20	paralemmin
Pre-frontal cortex	Streptozocin	P15087	Cpe	476	53257.3	20	221	19	0.5042	0.0002086	52.719	3	carboxypeptidase E
Pre-frontal cortex	Streptozocin	ENSRNOT00000088208	Acsbg1	730	81517.8	33	339	0	0.463	0.0002086	88.557	0	acyl-CoA synthetase bubblegum family member 1
Pre-frontal cortex	Streptozocin	ENSRNOT00000028725	Fkbp2	140	15360.2	8	65	65	0.5857	0.0002086	18.216	8	FKBP prolyl isomerase 2
Pre-frontal cortex	Streptozocin	ENSRNOT00000024264	Nars1	558	64068.9	26	259	24	0.4427	0.0002085	64.939	4	asparaginyl-tRNA synthetase 1
Pre-frontal cortex	Streptozocin	ENSRNOT00000092542	Mapk10	418	47940.4	23	194	0	0.5455	0.0002085	49.799	0	mitogen activated protein kinase 10
Pre-frontal cortex	Streptozocin	Q6RJR6-2	Rtn3	237	25396.5	10	110	0	0.3333	0.0002085	23.855	0	Reticulon-3
Pre-frontal cortex	Streptozocin	ENSRNOT00000076578	Atp1b1	248	28686.5	16	115	0	0.379	0.0002083	35.286	0	ATPase Na+/K+ transporting subunit beta 1
Pre-frontal cortex	Streptozocin	P39052-2	Dnm2 Dyn2	870	98080.1	46	403	0	0.3069	0.0002081	90.973	0	Dynamin-2, EC 3.6.5.5
Pre-frontal cortex	Streptozocin	ENSRNOT00000076403	Snx12	162	18854.7	10	75	0	0.6914	0.000208	19.919	0	sorting nexin 12
Pre-frontal cortex	Streptozocin	ENSRNOT00000092403	NA	54	6117.6	3	25	0	0.2037	0.000208	8.407	0	NA
Pre-frontal cortex	Streptozocin	ENSRNOT00000067518	Get3	348	38779.4	14	161	161	0.592	0.0002079	38.393	14	guided entry of tail-anchored proteins factor 3, ATPase
Pre-frontal cortex	Streptozocin	ENSRNOT00000024464	Clic4	253	28632.7	12	117	4	0.6719	0.0002078	29.239	2	chloride intracellular channel 4
Pre-frontal cortex	Streptozocin	ENSRNOT00000039946	Hbg1	147	16511.6	7	68	0	0.2041	0.0002078	16.245	0	hemoglobin subunit gamma 1
Pre-frontal cortex	Streptozocin	ENSRNOT00000048484	Hbe2	147	16359.6	7	68	0	0.2041	0.0002078	16.245	0	hemoglobin, epsilon 2
Pre-frontal cortex	Streptozocin	ENSRNOT00000007194	AABR07040944.1	145	16189.6	8	67	0	0.4138	0.0002076	15.807	0	Uncharacterized protein
Pre-frontal cortex	Streptozocin	Q64598	H2a1f	130	14149	5	60	0	0.2692	0.0002074	11.478	0	Histone H2A type 1-F
Pre-frontal cortex	Streptozocin	P04692-2	Tpm1 Alpha-tm Tpma	284	32637.6	12	131	0	0.25	0.0002072	27.136	0	Tropomyosin alpha-1 chain (Alpha-tropomyosin) (Tropomyosin-1)
Pre-frontal cortex	Streptozocin	ENSRNOT00000093241	Nrcam	1214	133882	51	559	0	0.4489	0.0002069	126.756	0	neuronal cell adhesion molecule
Pre-frontal cortex	Streptozocin	P97686-2	Nrcam	1195	131742	50	550	0	0.4485	0.0002068	124.854	0	Neuronal cell adhesion molecule, Nr-CAM (Ankyrin-binding cell adhesion molecule NrCAM) (Neuronal surface protein Bravo, rBravo) (NgCAM-related cell adhesion molecule, Ng-CAM-related)
Pre-frontal cortex	Streptozocin	P70645	Blmh	454	52270.8	24	209	0	0.5859	0.0002068	63.927	0	Bleomycin hydrolase, BH, BLM hydrolase, BMH, EC 3.4.22.40
Pre-frontal cortex	Streptozocin	ENSRNOT00000086143	Ppp2r5c	550	63688.2	25	253	15	0.4	0.0002067	54.081	2	protein phosphatase 2, regulatory subunit B', gamma
Pre-frontal cortex	Streptozocin	ENSRNOT00000027272	Map2k2	400	44236	23	184	23	0.45	0.0002067	48.61	9	mitogen activated protein kinase kinase 2
Pre-frontal cortex	Streptozocin	ENSRNOT00000005125	Blmh	455	52399.9	24	209	0	0.5846	0.0002064	63.927	0	bleomycin hydrolase
Pre-frontal cortex	Streptozocin	ENSRNOT00000057716	Psmd9	222	24781.6	9	102	0	0.4505	0.0002064	23.112	0	proteasome 26S subunit, non-ATPase 9
Pre-frontal cortex	Streptozocin	Q9WTV5	Psmd9	222	24795.6	9	102	0	0.4505	0.0002064	23.112	0	proteasome 26S subunit, non-ATPase 9
Pre-frontal cortex	Streptozocin	P15178	Dars1	501	57072.2	25	230	230	0.517	0.0002063	59.728	25	aspartyl-tRNA synthetase 1
Pre-frontal cortex	Streptozocin	ENSRNOT00000076152	Ppa2	303	34877.3	13	139	0	0.6304	0.0002061	35.096	0	inorganic pyrophosphatase 2
Pre-frontal cortex	Streptozocin	Q9JK11-3	Rtn4 Nogo	199	22371.3	8	91	1	0.3467	0.0002054	22.736	1	Reticulon-4 (Foocen) (Glut4 vesicle 20 kDa protein) (Neurite outgrowth inhibitor, Nogo protein)
Pre-frontal cortex	Streptozocin	ENSRNOT00000076337	Dync1li2	313	35084.8	16	143	0	0.6645	0.0002053	37.525	0	dynein, cytoplasmic 1 light intermediate chain 2
Pre-frontal cortex	Streptozocin	P62278	Rps13	151	17193.7	6	69	47	0.298	0.0002053	13.452	4	ribosomal protein S13
Pre-frontal cortex	Streptozocin	ENSRNOT00000039551	Ddx3x	311	34301.9	18	142	0	0.4727	0.0002051	41.382	0	DEAD-box helicase 3, X-linked
Pre-frontal cortex	Streptozocin	ENSRNOT00000076841	Septin4	298	33754.6	11	136	0	0.302	0.000205	27.367	0	septin 4
Pre-frontal cortex	Streptozocin	P33124-2	Acsl6 Acs2 Facl6	697	78159.2	33	318	0	0.5438	0.000205	79.327	0	Long-chain-fatty-acid--CoA ligase 6, EC 6.2.1.3 (Arachidonate--CoA ligase, EC 6.2.1.15) (Long-chain acyl-CoA synthetase 6, LACS 6) (Long-chain-fatty-acid--CoA ligase, brain isozyme)
Pre-frontal cortex	Streptozocin	Q9JK11-2	Rtn4 Nogo	360	38780.3	12	164	0	0.4667	0.0002047	35.503	0	Reticulon-4 (Foocen) (Glut4 vesicle 20 kDa protein) (Neurite outgrowth inhibitor, Nogo protein)
Pre-frontal cortex	Streptozocin	ENSRNOT00000084530	Gsk3a	481	50747	19	219	0	0.4969	0.0002046	48.748	0	glycogen synthase kinase 3 alpha
Pre-frontal cortex	Streptozocin	P49187-2	Mapk10 Jnk3 Prkm10	426	48079.3	23	194	0	0.5352	0.0002046	49.799	0	Mitogen-activated protein kinase 10, MAP kinase 10, MAPK 10, EC 2.7.11.24 (SAPK-beta) (Stress-activated protein kinase JNK3) (c-Jun N-terminal kinase 3) (p54-beta)
Pre-frontal cortex	Streptozocin	Q7M767	Ube2v2	145	16324.2	6	66	35	0.5034	0.0002045	15.446	2	ubiquitin conjugating enzyme E2 V2
Pre-frontal cortex	Streptozocin	ENSRNOT00000008877	Cops5	389	43601.7	15	177	177	0.491	0.0002044	38.605	15	COP9 signalosome subunit 5
Pre-frontal cortex	Streptozocin	ENSRNOT00000003867	Gsk3b	420	46662.9	21	191	0	0.6286	0.0002043	46.634	0	glycogen synthase kinase 3 beta
Pre-frontal cortex	Streptozocin	P18266	Gsk3b	420	46694.9	21	191	0	0.6286	0.0002043	46.634	0	glycogen synthase kinase 3 beta
Pre-frontal cortex	Streptozocin	P19332	Mapt Mtapt Tau	752	78498.3	27	342	0	0.3072	0.0002043	71.423	0	Microtubule-associated protein tau (Neurofibrillary tangle protein) (Paired helical filament-tau, PHF-tau)
Pre-frontal cortex	Streptozocin	ENSRNOT00000050269	Comt	264	29560.3	13	120	0	0.5492	0.0002042	32.259	0	catechol-O-methyltransferase
Pre-frontal cortex	Streptozocin	ENSRNOT00000004806	NA	253	28930.9	6	115	0	0.1067	0.0002042	14.66	0	NA
Pre-frontal cortex	Streptozocin	ENSRNOT00000007595	Ppp2r5c	524	60815.4	23	238	1	0.395	0.0002041	50.096	1	protein phosphatase 2, regulatory subunit B', gamma
Pre-frontal cortex	Streptozocin	Q63797	Psme1	249	28541	13	113	0	0.506	0.0002039	28.048	0	Proteasome activator complex subunit 1 (11S regulator complex subunit alpha, REG-alpha) (Activator of multicatalytic protease subunit 1) (Proteasome activator 28 subunit alpha, PA28a, PA28alpha)
Pre-frontal cortex	Streptozocin	Q7TQ94-2	Nit1 rCG_20134	291	31994.9	11	132	0	0.5189	0.0002038	30.44	0	Deaminated glutathione amidase, dGSH amidase, EC 3.5.1.128 (Nitrilase homolog 1)
Pre-frontal cortex	Streptozocin	P18265	Gsk3a	483	50977.1	19	219	0	0.4948	0.0002037	48.748	0	glycogen synthase kinase 3 alpha
Pre-frontal cortex	Streptozocin	P97686	Nrcam	1214	133810	50	550	0	0.4415	0.0002035	124.854	0	Neuronal cell adhesion molecule, Nr-CAM (Ankyrin-binding cell adhesion molecule NrCAM) (Neuronal surface protein Bravo, rBravo) (NgCAM-related cell adhesion molecule, Ng-CAM-related)
Pre-frontal cortex	Streptozocin	ENSRNOT00000026870	Sh3gl3	347	39123.9	14	157	157	0.5187	0.0002033	38.261	14	SH3 domain containing GRB2 like 3, endophilin A3
Pre-frontal cortex	Streptozocin	ENSRNOT00000067618	Trim2	745	81168.1	33	337	0	0.5181	0.0002032	92.304	0	tripartite motif-containing 2
Pre-frontal cortex	Streptozocin	P0DJJ3	Sgip1	827	88512.1	31	374	374	0.5393	0.0002032	86.472	31	SH3GL interacting endocytic adaptor 1
Pre-frontal cortex	Streptozocin	ENSRNOT00000010674	Yars1	564	62968	29	255	0	0.523	0.0002031	62.279	0	tyrosyl-tRNA synthetase 1
Pre-frontal cortex	Streptozocin	ENSRNOT00000076590	Snx12	166	19215.8	10	75	0	0.6747	0.000203	19.919	0	sorting nexin 12
Pre-frontal cortex	Streptozocin	ENSRNOT00000003283	Plp1	277	30039.1	12	125	125	0.3394	0.0002027	28.216	12	proteolipid protein 1
Pre-frontal cortex	Streptozocin	ENSRNOT00000030760	Acsl6	697	78111.9	32	314	4	0.5251	0.0002024	77.108	1	acyl-CoA synthetase long-chain family member 6
Pre-frontal cortex	Streptozocin	ENSRNOT00000004699	Prkca	672	76712.1	32	302	0	0.4092	0.0002019	78.167	0	protein kinase C, alpha
Pre-frontal cortex	Streptozocin	P05696	Prkca Pkca	672	76724.2	32	302	0	0.4092	0.0002019	78.167	0	Protein kinase C alpha type, PKC-A, PKC-alpha, EC 2.7.11.13
Pre-frontal cortex	Streptozocin	ENSRNOT00000022014	Fam136a	138	15596.5	5	62	62	0.5145	0.0002018	15.581	5	family with sequence similarity 136, member A
Pre-frontal cortex	Streptozocin	ENSRNOT00000085052	Septin4	450	51146.2	19	202	0	0.3578	0.0002017	44.125	0	septin 4
Pre-frontal cortex	Streptozocin	ENSRNOT00000024261	Septin2	361	41548.3	15	162	130	0.4903	0.0002016	41.038	11	septin 2
Pre-frontal cortex	Streptozocin	ENSRNOT00000006591	Npm1	292	32521.8	12	131	0	0.3596	0.0002016	29.998	0	nucleophosmin 1
Pre-frontal cortex	Streptozocin	ENSRNOT00000005798	Ppm1h	513	56326.7	24	230	140	0.5068	0.0002014	59.863	14	protein phosphatase, Mg2+/Mn2+ dependent, 1H
Pre-frontal cortex	Streptozocin	ENSRNOT00000082793	Nrcam	1183	130803	50	530	0	0.4556	0.0002013	122.842	0	neuronal cell adhesion molecule
Pre-frontal cortex	Streptozocin	ENSRNOT00000010043	Rab15	212	24250.1	7	95	17	0.2642	0.0002013	15.643	2	RAB15, member RAS oncogene family
Pre-frontal cortex	Streptozocin	ENSRNOT00000051003	NA	154	16319.2	7	69	0	0.2987	0.0002013	16.453	0	NA
Pre-frontal cortex	Streptozocin	Q9JJ54-3	Hnrnpd Auf1 Hnrpd	304	32634	13	136	0	0.2862	0.000201	29.704	0	Heterogeneous nuclear ribonucleoprotein D0, hnRNP D0 (AU-rich element RNA-binding protein 1)
Pre-frontal cortex	Streptozocin	ENSRNOT00000023078	Ppp5c	499	56862.2	19	223	223	0.4609	0.0002008	48.698	19	protein phosphatase 5, catalytic subunit
Pre-frontal cortex	Streptozocin	ENSRNOT00000027677	Gsk3a	490	51630.4	19	219	0	0.4878	0.0002008	48.748	0	glycogen synthase kinase 3 alpha
Pre-frontal cortex	Streptozocin	ENSRNOT00000076560	Dync1li2	396	44751.8	19	177	0	0.6566	0.0002008	45.671	0	dynein, cytoplasmic 1 light intermediate chain 2
Pre-frontal cortex	Streptozocin	Q9Z0W7	Clic4	253	28596.7	10	113	0	0.4901	0.0002007	24.678	0	chloride intracellular channel 4
Pre-frontal cortex	Streptozocin	Q5XI22	Acat2	397	41064.1	13	177	0	0.5264	0.0002003	39.877	0	acetyl-CoA acetyltransferase 2
Pre-frontal cortex	Streptozocin	ENSRNOT00000019047	Hint3	175	19704.8	10	78	0	0.6171	0.0002002	24.687	0	histidine triad nucleotide binding protein 3
Pre-frontal cortex	Streptozocin	Q8K3P7	Hint3 Hint4	175	19662.7	10	78	0	0.6171	0.0002002	24.687	0	Adenosine 5'-monophosphoramidase HINT3, EC 3.9.1.- (HINT-4) (Histidine triad nucleotide-binding protein 3, HINT-3)
Pre-frontal cortex	Streptozocin	P19511	Atp5pb	256	28832.5	12	114	114	0.5039	0.0002001	24.942	12	ATP synthase peripheral stalk-membrane subunit b
Pre-frontal cortex	Streptozocin	Q62847	Add3	705	78736.7	28	314	0	0.427	0.0002001	69.365	0	adducin 3
Pre-frontal cortex	Streptozocin	ENSRNOT00000008477	Vdac1	283	30718.6	13	126	16	0.6678	0.0002	39.077	1	voltage-dependent anion channel 1
Pre-frontal cortex	Streptozocin	ENSRNOT00000018303	Atp6v1b1	611	67186.8	23	271	0	0.2062	0.0001993	54.44	0	ATPase H+ transporting V1 subunit B1
Pre-frontal cortex	Streptozocin	D4AAT7	Naxd Carkd	343	36476.9	15	152	0	0.4927	0.0001991	40.838	0	ATP-dependent (S)-NAD(P)H-hydrate dehydratase, EC 4.2.1.93 (ATP-dependent NAD(P)HX dehydratase) (Carbohydrate kinase domain-containing protein) (NAD(P)HX dehydratase)
Pre-frontal cortex	Streptozocin	ENSRNOT00000004083	Tiprl	271	31186.6	11	120	120	0.5166	0.0001989	26.568	11	TOR signaling pathway regulator
Pre-frontal cortex	Streptozocin	ENSRNOT00000066986	Dtd1	174	19606.1	9	77	0	0.6437	0.0001988	21.847	0	D-aminoacyl-tRNA deacylase 1
Pre-frontal cortex	Streptozocin	P12839	Nefm	846	95715.6	34	374	170	0.3806	0.0001986	82.742	13	neurofilament medium
Pre-frontal cortex	Streptozocin	ENSRNOT00000085923	Epdr1	224	25604.9	12	99	99	0.4062	0.0001986	26.111	12	ependymin related 1
Pre-frontal cortex	Streptozocin	ENSRNOT00000089746	NA	369	38628	17	163	0	0.3089	0.0001985	39.46	0	NA
Pre-frontal cortex	Streptozocin	P19332-8	Mapt Mtapt Tau	775	81117.5	27	342	0	0.2981	0.0001983	71.423	0	Microtubule-associated protein tau (Neurofibrillary tangle protein) (Paired helical filament-tau, PHF-tau)
Pre-frontal cortex	Streptozocin	P97546-1	Nptn Sdfr1 Sdr1	281	31254.7	11	124	0	0.2598	0.0001983	25.368	0	Neuroplastin (Glycoprotein 55/65, gp55/65) (Stromal cell-derived receptor 1, SDR-1)
Pre-frontal cortex	Streptozocin	ENSRNOT00000064297	Cpe	474	53236.4	18	209	7	0.4346	0.0001981	47.498	1	carboxypeptidase E
Pre-frontal cortex	Streptozocin	ENSRNOT00000058817	Acsl6	722	80925.7	33	318	0	0.5249	0.0001979	79.327	0	acyl-CoA synthetase long-chain family member 6
Pre-frontal cortex	Streptozocin	P97686-3	Nrcam	1183	130731	49	521	0	0.448	0.0001979	120.94	0	Neuronal cell adhesion molecule, Nr-CAM (Ankyrin-binding cell adhesion molecule NrCAM) (Neuronal surface protein Bravo, rBravo) (NgCAM-related cell adhesion molecule, Ng-CAM-related)
Pre-frontal cortex	Streptozocin	ENSRNOT00000002530	Ppm1f	450	49116.8	13	198	198	0.4356	0.0001977	37.469	13	protein phosphatase, Mg2+/Mn2+ dependent, 1F
Pre-frontal cortex	Streptozocin	ENSRNOT00000020192	Hagh	309	34118.5	10	136	37	0.4757	0.0001977	25.847	2	hydroxyacyl glutathione hydrolase
Pre-frontal cortex	Streptozocin	ENSRNOT00000070807	Gng4	75	8381.2	3	33	33	0.64	0.0001977	9.058	3	G protein subunit gamma 4
Pre-frontal cortex	Streptozocin	ENSRNOT00000033408	Acat2	309	32157.4	11	136	0	0.5761	0.0001977	33.507	0	acetyl-CoA acetyltransferase 2
Pre-frontal cortex	Streptozocin	P0CG51	Ubb	305	34329.5	12	134	0	0.7738	0.0001974	26.31	0	Polyubiquitin-B [Cleaved into: Ubiquitin ]
Pre-frontal cortex	Streptozocin	ENSRNOT00000008736	Atp6v0c	155	15779.5	8	68	68	0.3871	0.0001971	19.552	8	ATPase H+ transporting V0 subunit C
Pre-frontal cortex	Streptozocin	ENSRNOT00000077707	Acat2	310	32242.4	11	136	0	0.5742	0.0001971	33.507	0	acetyl-CoA acetyltransferase 2
Pre-frontal cortex	Streptozocin	ENSRNOT00000006083	Lin7a	212	23694.5	12	93	0	0.4953	0.0001971	28.968	0	lin-7 homolog A, crumbs cell polarity complex component
Pre-frontal cortex	Streptozocin	ENSRNOT00000030470	Gphn	618	67027.7	26	271	0	0.5291	0.000197	63.442	0	gephyrin
Pre-frontal cortex	Streptozocin	ENSRNOT00000087180	Iah1	249	27968.4	12	109	109	0.5743	0.0001967	29.949	12	isoamyl acetate hydrolyzing esterase 1
Pre-frontal cortex	Streptozocin	ENSRNOT00000016709	Adk	361	40089.3	15	158	0	0.6094	0.0001966	38.488	0	adenosine kinase
Pre-frontal cortex	Streptozocin	P04182	Oat	439	48284	21	192	192	0.6674	0.0001965	54.447	21	ornithine aminotransferase
Pre-frontal cortex	Streptozocin	ENSRNOT00000092428	Mapt	650	67655.5	23	284	0	0.2523	0.0001963	60.166	0	microtubule-associated protein tau
Pre-frontal cortex	Streptozocin	ENSRNOT00000014062	Xpo1	1071	122941	44	467	467	0.493	0.0001959	102.646	44	exportin 1
Pre-frontal cortex	Streptozocin	P80349	Fuc3	39	4459	1	17	0	0.4615	0.0001958	4.159	0	Fuctinin-3 (Fucosyltransferase inhibitor 3)
Pre-frontal cortex	Streptozocin	ENSRNOT00000010753	Psma3	255	28383.1	13	111	15	0.3373	0.0001956	27.318	1	proteasome 20S subunit alpha 3
Pre-frontal cortex	Streptozocin	P21571	Atp5pf	108	12468.6	5	47	47	0.3981	0.0001955	14.604	5	ATP synthase peripheral stalk subunit F6
Pre-frontal cortex	Streptozocin	ENSRNOT00000000749	Cisd1	108	12071.1	5	47	47	0.4444	0.0001955	13.515	5	CDGSH iron sulfur domain 1
Pre-frontal cortex	Streptozocin	ENSRNOT00000078583	Nrcam	1214	133851	49	528	0	0.4283	0.0001954	121.686	0	neuronal cell adhesion molecule
Pre-frontal cortex	Streptozocin	ENSRNOT00000092186	Adap1	414	47494.9	22	180	0	0.442	0.0001953	46.166	0	ArfGAP with dual PH domains 1
Pre-frontal cortex	Streptozocin	ENSRNOT00000006341	Kif5c	955	109055	44	414	0	0.5257	0.0001948	111.866	0	kinesin family member 5C
Pre-frontal cortex	Streptozocin	ENSRNOT00000027976	Rpl13a	203	23413.4	11	88	0	0.4286	0.0001948	18.149	0	ribosomal protein L13A
Pre-frontal cortex	Streptozocin	P35427	Rpl13a	203	23443.4	11	88	0	0.4286	0.0001948	18.149	0	60S ribosomal protein L13a
Pre-frontal cortex	Streptozocin	Q9JK11-4	Rtn4 Nogo	379	40676.2	12	164	0	0.4433	0.0001944	35.503	0	Reticulon-4 (Foocen) (Glut4 vesicle 20 kDa protein) (Neurite outgrowth inhibitor, Nogo protein)
Pre-frontal cortex	Streptozocin	ENSRNOT00000013691	Cdipt	213	23579.2	8	92	92	0.4507	0.0001941	19.406	8	CDP-diacylglycerol--inositol 3-phosphatidyltransferase
Pre-frontal cortex	Streptozocin	ENSRNOT00000046746	Ezr	586	69329.6	27	253	0	0.3584	0.000194	56.298	0	ezrin
Pre-frontal cortex	Streptozocin	Q6PCT3	Tpd52l2	220	23959.1	9	95	95	0.4909	0.000194	23.337	9	TPD52 like 2
Pre-frontal cortex	Streptozocin	P70600-3	Ptk2b Fak2 Pyk2	967	111004	49	417	0	0.5998	0.0001937	118.553	0	Protein-tyrosine kinase 2-beta, EC 2.7.10.2 (Calcium-dependent tyrosine kinase, CADTK) (Calcium-regulated non-receptor proline-rich tyrosine kinase) (Cell adhesion kinase beta, CAK-beta, CAKB) (Focal adhesion kinase 2, FADK 2) (Proline-rich tyrosine kinase 2)
Pre-frontal cortex	Streptozocin	ENSRNOT00000005930	Lta4h	611	69027.1	26	263	263	0.4664	0.0001934	68.755	26	leukotriene A4 hydrolase
Pre-frontal cortex	Streptozocin	ENSRNOT00000039836	Psmd3	530	60632.3	25	228	228	0.4642	0.0001933	59.822	25	proteasome 26S subunit, non-ATPase 3
Pre-frontal cortex	Streptozocin	ENSRNOT00000015278	LOC680700	221	25412	7	95	0	0.267	0.0001931	18.236	0	similar to ribosomal protein L10a
Pre-frontal cortex	Streptozocin	ENSRNOT00000035657	Rpl23a	156	17666.1	5	67	55	0.3269	0.000193	11.804	4	ribosomal protein L23a
Pre-frontal cortex	Streptozocin	ENSRNOT00000024471	Ndufab1	156	17485.1	5	67	55	0.2692	0.000193	11.669	4	NADH:ubiquinone oxidoreductase subunit AB1
Pre-frontal cortex	Streptozocin	ENSRNOT00000090033	Ezr	589	69679.8	27	253	0	0.3565	0.000193	56.298	0	ezrin
Pre-frontal cortex	Streptozocin	ENSRNOT00000022862	Ppp2r5d	595	69122	32	255	140	0.4807	0.0001925	66.79	21	protein phosphatase 2, regulatory subunit B', delta
Pre-frontal cortex	Streptozocin	P07808	Npy	98	11007.5	4	42	42	0.3265	0.0001925	12.845	4	neuropeptide Y
Pre-frontal cortex	Streptozocin	ENSRNOT00000074175	AABR07060872.1	210	22903	8	90	0	0.3762	0.0001925	25.879	0	Ig-like domain-containing protein
Pre-frontal cortex	Streptozocin	ENSRNOT00000025783	Mpi	423	46375.9	19	181	180	0.5745	0.0001922	47.62	18	mannose phosphate isomerase
Pre-frontal cortex	Streptozocin	ENSRNOT00000085979	Nrcam	1308	144159	51	559	0	0.4167	0.000192	126.756	0	neuronal cell adhesion molecule
Pre-frontal cortex	Streptozocin	ENSRNOT00000017833	Syngr3	199	21337.9	7	85	85	0.3819	0.0001919	18.636	7	synaptogyrin 3
Pre-frontal cortex	Streptozocin	Q6GMN2-2	Baiap2	522	57488	27	223	0	0.5077	0.0001919	61.242	0	Brain-specific angiogenesis inhibitor 1-associated protein 2, BAI-associated protein 2, BAI1-associated protein 2 (Insulin receptor substrate protein of 53 kDa, IRSp53, Insulin receptor substrate p53) (Insulin receptor tyrosine kinase substrate protein p53)
Pre-frontal cortex	Streptozocin	ENSRNOT00000046344	Tollip	274	30276.9	14	117	117	0.5401	0.0001918	32.029	14	toll interacting protein
Pre-frontal cortex	Streptozocin	ENSRNOT00000042165	AABR07060872.1	211	23146.1	8	90	0	0.3744	0.0001916	25.879	0	Uncharacterized protein
Pre-frontal cortex	Streptozocin	ENSRNOT00000031991	AABR07060872.1	211	23221.1	8	90	0	0.3744	0.0001916	25.879	0	Uncharacterized protein
Pre-frontal cortex	Streptozocin	Q499N5	Acsf2	615	67824.8	25	262	262	0.5772	0.0001914	63.005	25	acyl-CoA synthetase family member 2
Pre-frontal cortex	Streptozocin	ENSRNOT00000073688	Tbca	108	12717.7	7	46	40	0.5463	0.0001914	12.911	5	tubulin folding cofactor A
Pre-frontal cortex	Streptozocin	ENSRNOT00000092002	Rtraf	296	33785.8	8	126	0	0.3412	0.0001912	23.744	0	RNA transcription, translation and transport factor
Pre-frontal cortex	Streptozocin	ENSRNOT00000039291	Hars1	508	57306.1	23	216	190	0.4862	0.000191	50.085	17	histidyl-tRNA synthetase 1
Pre-frontal cortex	Streptozocin	ENSRNOT00000092723	Pfdn6	92	10333.5	5	39	0	0.3261	0.0001905	11.233	0	prefoldin subunit 6
Pre-frontal cortex	Streptozocin	Q64640	Adk	361	40090.3	14	153	0	0.5762	0.0001904	36.239	0	adenosine kinase
Pre-frontal cortex	Streptozocin	P55068	Bcan	883	95979.1	30	374	0	0.3024	0.0001903	74.133	0	brevican
Pre-frontal cortex	Streptozocin	ENSRNOT00000020959	Prkce	497	56105.2	20	210	24	0.4406	0.0001898	53.265	2	protein kinase C, epsilon
Pre-frontal cortex	Streptozocin	ENSRNOT00000085332	Cab39	341	39829.7	19	144	25	0.4223	0.0001897	37.371	4	calcium binding protein 39
Pre-frontal cortex	Streptozocin	ENSRNOT00000077790	Slc1a3	431	47102.3	20	182	0	0.2622	0.0001897	50.118	0	solute carrier family 1 member 3
Pre-frontal cortex	Streptozocin	ENSRNOT00000004583	AABR07029195.1	270	28731.1	15	114	1	0.3889	0.0001897	31.828	1	40S ribosomal protein S2
Pre-frontal cortex	Streptozocin	ENSRNOT00000049337	Rab4a	218	24375.2	11	92	38	0.445	0.0001896	27.923	6	RAB4A, member RAS oncogene family
Pre-frontal cortex	Streptozocin	ENSRNOT00000008504	Hspa2	633	69580.7	36	267	13	0.4092	0.0001895	83.073	1	heat shock protein family A (Hsp70) member 2
Pre-frontal cortex	Streptozocin	ENSRNOT00000049812	Rtn3	261	28191.2	10	110	0	0.3027	0.0001893	23.855	0	reticulon 3
Pre-frontal cortex	Streptozocin	ENSRNOT00000015043	Timm8a1	95	10863.2	5	40	0	0.5053	0.0001892	13.022	0	translocase of inner mitochondrial membrane 8A1
Pre-frontal cortex	Streptozocin	ENSRNOT00000084670	Abr	822	93693.5	31	346	0	0.4343	0.0001891	78.393	0	ABR activator of RhoGEF and GTPase
Pre-frontal cortex	Streptozocin	ENSRNOT00000038531	LOC100361061	202	23213.2	10	85	0	0.3911	0.0001891	16.562	0	ribosomal protein L13a-like
Pre-frontal cortex	Streptozocin	Q63622-3	Dlg2 Dlgh2	739	81892.9	35	311	1	0.4899	0.0001891	82.339	1	Disks large homolog 2 (Channel-associated protein of synapse-110, Chapsyn-110) (Postsynaptic density protein PSD-93)
Pre-frontal cortex	Streptozocin	ENSRNOT00000012545	Clasp2	1286	140533	50	541	45	0.4743	0.000189	119.416	1	cytoplasmic linker associated protein 2
Pre-frontal cortex	Streptozocin	ENSRNOT00000086911	AABR07060872.1	214	23418.3	8	90	0	0.3692	0.0001889	25.879	0	Ig-like domain-containing protein
Pre-frontal cortex	Streptozocin	ENSRNOT00000068323	Rps28	69	7818.2	3	29	29	0.3043	0.0001888	7.827	3	ribosomal protein S28
Pre-frontal cortex	Streptozocin	ENSRNOT00000044541	Psma8	250	27857.7	7	105	0	0.276	0.0001887	20.299	0	proteasome 20S subunit alpha 8
Pre-frontal cortex	Streptozocin	Q62813	Lsamp	338	37283.1	14	142	0	0.4112	0.0001887	34.156	0	limbic system-associated membrane protein
Pre-frontal cortex	Streptozocin	ENSRNOT00000001779	Gnaz	355	40835.8	16	149	143	0.5155	0.0001886	38.91	14	G protein subunit alpha z
Pre-frontal cortex	Streptozocin	ENSRNOT00000085599	Slc1a3	498	55206.3	21	209	0	0.253	0.0001886	52.585	0	solute carrier family 1 member 3
Pre-frontal cortex	Streptozocin	G3V7P1	Stx12	274	31149.9	10	115	17	0.4781	0.0001886	26.256	3	syntaxin 12
Pre-frontal cortex	Streptozocin	ENSRNOT00000022348	Rps23	143	15779.7	6	60	24	0.4266	0.0001885	12.243	1	ribosomal protein S23
Pre-frontal cortex	Streptozocin	ENSRNOT00000021073	Tpm4	248	28474.5	14	104	0	0.4153	0.0001884	31.84	0	tropomyosin 4
Pre-frontal cortex	Streptozocin	ENSRNOT00000024306	Psmd1	953	105615	43	399	0	0.5792	0.0001881	107.964	0	proteasome 26S subunit, non-ATPase 1
Pre-frontal cortex	Streptozocin	P56536	Kif5c Nkhc2	239	27129.7	9	100	0	0.4351	0.000188	23.777	0	Kinesin heavy chain isoform 5C (Kinesin heavy chain neuron-specific 2)
Pre-frontal cortex	Streptozocin	ENSRNOT00000030273	Gng13	67	7956.1	4	28	28	0.3582	0.0001878	8.746	4	G protein subunit gamma 13
Pre-frontal cortex	Streptozocin	ENSRNOT00000092719	Mapk10	464	52452.3	23	194	0	0.4914	0.0001878	49.799	0	mitogen activated protein kinase 10
Pre-frontal cortex	Streptozocin	ENSRNOT00000092395	Mapk10	464	52480.4	23	194	0	0.4914	0.0001878	49.799	0	mitogen activated protein kinase 10
Pre-frontal cortex	Streptozocin	ENSRNOT00000020536	Mob4	225	25997.6	7	94	94	0.5022	0.0001877	18.782	7	MOB family member 4, phocein
Pre-frontal cortex	Streptozocin	ENSRNOT00000005687	Baiap2	535	59127.9	27	223	0	0.4953	0.0001873	61.242	0	BAR/IMD domain containing adaptor protein 2
Pre-frontal cortex	Streptozocin	A0A0G2JTR4	Abr	859	97613.2	32	358	12	0.4435	0.0001872	82.132	1	Active breakpoint cluster region-related protein
Pre-frontal cortex	Streptozocin	ENSRNOT00000020951	Coro2b	480	54911.2	20	200	200	0.4521	0.0001872	47.125	20	coronin 2B
Pre-frontal cortex	Streptozocin	P35434	Atp5f1d	168	17566.2	6	70	0	0.4881	0.0001872	17.833	0	ATP synthase F1 subunit delta
Pre-frontal cortex	Streptozocin	ENSRNOT00000083169	Nudt3	168	19065.5	8	70	64	0.4583	0.0001872	18.558	7	nudix hydrolase 3
Pre-frontal cortex	Streptozocin	ENSRNOT00000065043	Naxd	365	38688	15	152	0	0.463	0.0001871	40.838	0	NAD(P)HX dehydratase
Pre-frontal cortex	Streptozocin	ENSRNOT00000089470	Psmd1	817	90356	37	340	0	0.5802	0.000187	93.746	0	proteasome 26S subunit, non-ATPase 1
Pre-frontal cortex	Streptozocin	ENSRNOT00000073140	Eif4a3	411	46793.2	19	171	115	0.4769	0.0001869	38.044	15	eukaryotic translation initiation factor 4A3
Pre-frontal cortex	Streptozocin	ENSRNOT00000061233	Ubqln1	582	61957.3	21	242	30	0.4725	0.0001868	57.951	2	ubiquilin 1
Pre-frontal cortex	Streptozocin	ENSRNOT00000003926	Guk1	219	24019.3	9	91	91	0.3927	0.0001867	20.661	9	guanylate kinase 1
Pre-frontal cortex	Streptozocin	Q5HZA6-2	Prepl	638	73160.6	26	265	0	0.5078	0.0001866	67.011	0	Prolyl endopeptidase-like, EC 3.4.21.- (Prolylendopeptidase-like)
Pre-frontal cortex	Streptozocin	ENSRNOT00000013538	Lgals1	135	14829.2	7	56	56	0.4519	0.0001864	17.153	7	galectin 1
Pre-frontal cortex	Streptozocin	ENSRNOT00000006408	Sirpa	509	55638	18	211	0	0.3379	0.0001862	52.057	0	signal-regulatory protein alpha
Pre-frontal cortex	Streptozocin	ENSRNOT00000015840	Kcnab2	367	40977	16	152	15	0.5286	0.0001861	42.982	1	potassium voltage-gated channel subfamily A regulatory beta subunit 2
Pre-frontal cortex	Streptozocin	ENSRNOT00000079359	Hspa2	601	65996.8	34	249	0	0.3977	0.0001861	79.409	0	heat shock protein family A (Hsp70) member 2
Pre-frontal cortex	Streptozocin	ENSRNOT00000075963	Ogt	1029	115130	43	426	0	0.5024	0.000186	104.613	0	O-linked N-acetylglucosamine (GlcNAc) transferase
Pre-frontal cortex	Streptozocin	ENSRNOT00000072851	Vps26b	336	39082.2	17	139	126	0.4315	0.0001859	38.566	15	VPS26 retromer complex component B
Pre-frontal cortex	Streptozocin	ENSRNOT00000076629	NA	208	23491.5	8	86	0	0.2788	0.0001858	20.681	0	NA
Pre-frontal cortex	Streptozocin	ENSRNOT00000030007	Ptk2b	1009	115692	49	417	0	0.5748	0.0001857	118.553	0	protein tyrosine kinase 2 beta
Pre-frontal cortex	Streptozocin	O70196	Prep	710	80671.9	30	293	14	0.5648	0.0001854	74.044	1	prolyl endopeptidase
Pre-frontal cortex	Streptozocin	ENSRNOT00000021071	Atxn10	475	53674.5	20	196	196	0.5011	0.0001854	50.104	20	ataxin 10
Pre-frontal cortex	Streptozocin	P20280	Rpl21	160	18435.9	7	66	25	0.275	0.0001853	13.962	3	ribosomal protein L21
Pre-frontal cortex	Streptozocin	Q9WVA1	Timm8a1	97	11017.3	5	40	0	0.4948	0.0001853	13.022	0	translocase of inner mitochondrial membrane 8A1
Pre-frontal cortex	Streptozocin	ENSRNOT00000020325	Aldh7a1	539	58693.4	22	222	222	0.4954	0.000185	58.235	22	aldehyde dehydrogenase 7 family, member A1
Pre-frontal cortex	Streptozocin	ENSRNOT00000007247	Itpka	459	50820.8	23	189	173	0.5359	0.000185	57.873	21	inositol-trisphosphate 3-kinase A
Pre-frontal cortex	Streptozocin	ENSRNOT00000092172	Rufy3	637	71978.5	26	262	0	0.3705	0.0001848	58.151	0	RUN and FYVE domain containing 3
Pre-frontal cortex	Streptozocin	ENSRNOT00000041325	Atcay	372	42072.8	16	153	153	0.3145	0.0001848	37.04	16	ATCAY kinesin light chain interacting caytaxin
Pre-frontal cortex	Streptozocin	ENSRNOT00000091935	Sirpa	513	56065.3	18	211	0	0.3353	0.0001848	52.057	0	signal-regulatory protein alpha
Pre-frontal cortex	Streptozocin	Q792I0	Lin7c	197	21802.5	10	81	35	0.4315	0.0001847	25.594	3	lin-7 homolog C, crumbs cell polarity complex component
Pre-frontal cortex	Streptozocin	ENSRNOT00000008200	Lrpprc	1392	156562	58	572	6	0.4576	0.0001846	132.742	1	leucine-rich pentatricopeptide repeat containing
Pre-frontal cortex	Streptozocin	ENSRNOT00000009100	Ddx1	740	82426.8	33	304	304	0.5095	0.0001846	83.983	33	DEAD-box helicase 1
Pre-frontal cortex	Streptozocin	ENSRNOT00000018369	Plpbp	275	30067.6	10	113	92	0.4691	0.0001846	27.405	8	pyridoxal phosphate binding protein
Pre-frontal cortex	Streptozocin	P11240	Cox5a	146	16101.3	9	60	60	0.5753	0.0001846	24.046	9	cytochrome c oxidase subunit 5A
Pre-frontal cortex	Streptozocin	ENSRNOT00000022532	Pcyox1	504	56233.6	22	207	207	0.5813	0.0001845	58.963	22	prenylcysteine oxidase 1
Pre-frontal cortex	Streptozocin	Q64560	Tpp2	1249	138188	54	513	513	0.5124	0.0001845	126.036	54	tripeptidyl peptidase 2
Pre-frontal cortex	Streptozocin	ENSRNOT00000078048	Stx12	239	27399.8	7	98	0	0.4059	0.0001842	20.726	0	syntaxin 12
Pre-frontal cortex	Streptozocin	ENSRNOT00000076652	Pdk3	415	47895.6	19	170	111	0.4819	0.000184	45.47	15	pyruvate dehydrogenase kinase 3
Pre-frontal cortex	Streptozocin	ENSRNOT00000058436	AABR07026311.1	127	13411.5	6	52	0	0.4803	0.000184	13.762	0	Histone H2A
Pre-frontal cortex	Streptozocin	P62919	Rpl8	257	27989.3	11	105	105	0.5175	0.0001836	27.255	11	ribosomal protein L8
Pre-frontal cortex	Streptozocin	O88339	Epn1	575	60102.6	18	235	0	0.2991	0.0001836	47.131	0	Epsin 1
Pre-frontal cortex	Streptozocin	P20650	Ppm1a	382	42371.7	15	156	0	0.5105	0.0001835	38.033	0	protein phosphatase, Mg2+/Mn2+ dependent, 1A
Pre-frontal cortex	Streptozocin	ENSRNOT00000004692	Ogt	1036	115643	42	423	0	0.4865	0.0001834	102.469	0	O-linked N-acetylglucosamine (GlcNAc) transferase
Pre-frontal cortex	Streptozocin	P29147	Bdh1	343	38159.3	16	140	0	0.4956	0.0001834	37.283	0	3-hydroxybutyrate dehydrogenase 1
Pre-frontal cortex	Streptozocin	ENSRNOT00000021286	Epn1	576	60173.7	18	235	0	0.2986	0.0001833	47.131	0	Epsin 1
Pre-frontal cortex	Streptozocin	ENSRNOT00000082967	Ogt	1046	116861	43	426	0	0.4943	0.000183	104.613	0	O-linked N-acetylglucosamine (GlcNAc) transferase
Pre-frontal cortex	Streptozocin	P35284	Rab12	243	27236.1	11	99	9	0.3539	0.000183	23.1	2	RAB12, member RAS oncogene family
Pre-frontal cortex	Streptozocin	ENSRNOT00000091382	Cask	909	103127	38	370	0	0.4532	0.0001829	91.441	0	calcium/calmodulin dependent serine protein kinase
Pre-frontal cortex	Streptozocin	P09216	Prkce	737	83406.9	32	300	109	0.4179	0.0001829	79.489	12	protein kinase C, epsilon
Pre-frontal cortex	Streptozocin	Q9JJ54-2	Hnrnpd Auf1 Hnrpd	334	36001.2	13	136	0	0.2605	0.0001829	29.704	0	Heterogeneous nuclear ribonucleoprotein D0, hnRNP D0 (AU-rich element RNA-binding protein 1)
Pre-frontal cortex	Streptozocin	ENSRNOT00000075054	Gphn	666	72118.2	26	271	0	0.491	0.0001828	63.442	0	gephyrin
Pre-frontal cortex	Streptozocin	ENSRNOT00000002366	Bdh1	344	38290.3	16	140	0	0.4942	0.0001828	37.283	0	3-hydroxybutyrate dehydrogenase 1
Pre-frontal cortex	Streptozocin	ENSRNOT00000004895	Cnpy2	182	20678.2	7	74	74	0.4231	0.0001827	17.028	7	canopy FGF signaling regulator 2
Pre-frontal cortex	Streptozocin	Q5SGE0	Lrpprc	1392	156536	57	566	0	0.4468	0.0001827	129.498	0	leucine-rich pentatricopeptide repeat containing
Pre-frontal cortex	Streptozocin	P13383	Ncl Nuc	713	77083	27	290	0	0.2819	0.0001827	61.083	0	Nucleolin (Protein C23)
Pre-frontal cortex	Streptozocin	ENSRNOT00000024712	Ncl	714	77212	27	290	0	0.2815	0.0001825	61.083	0	nucleolin
Pre-frontal cortex	Streptozocin	ENSRNOT00000082893	H2az2	128	13482.5	6	52	0	0.4766	0.0001825	13.762	0	H2A.Z variant histone 2
Pre-frontal cortex	Streptozocin	P0C0S7	H2az1	128	13526.5	6	52	0	0.4766	0.0001825	13.762	0	H2A.Z variant histone 1
Pre-frontal cortex	Streptozocin	Q63622-5	Dlg2 Dlgh2	606	68001.3	28	246	0	0.467	0.0001824	67.125	0	Disks large homolog 2 (Channel-associated protein of synapse-110, Chapsyn-110) (Postsynaptic density protein PSD-93)
Pre-frontal cortex	Streptozocin	ENSRNOT00000075868	Psma3	237	26394.3	12	96	0	0.3038	0.000182	24.919	0	proteasome 20S subunit alpha 3
Pre-frontal cortex	Streptozocin	Q9Z250	Lin7a Mals1 Veli1	232	25830.5	13	94	0	0.4526	0.000182	30.342	0	Protein lin-7 homolog A, Lin-7A (Mammalian lin-seven protein 1, MALS-1) (Vertebrate lin-7 homolog 1, Veli-1)
Pre-frontal cortex	Streptozocin	ENSRNOT00000017000	S100a1	94	10535.1	2	38	38	0.1596	0.0001816	6.808	2	S100 calcium binding protein A1
Pre-frontal cortex	Streptozocin	ENSRNOT00000005194	Nit1	327	36052.1	11	132	0	0.4618	0.0001814	30.44	0	nitrilase 1
Pre-frontal cortex	Streptozocin	Q62915	Cask	909	103175	37	367	0	0.4455	0.0001814	89.643	0	calcium/calmodulin dependent serine protein kinase
Pre-frontal cortex	Streptozocin	ENSRNOT00000089056	Tpm4	258	29386.9	14	104	0	0.3992	0.0001811	31.84	0	tropomyosin 4
Pre-frontal cortex	Streptozocin	ENSRNOT00000040808	Tpm1	293	33598.1	11	118	0	0.2526	0.0001809	25.497	0	tropomyosin 1
Pre-frontal cortex	Streptozocin	ENSRNOT00000077612	Gsk3b	430	47962.5	20	173	0	0.5628	0.0001808	42.904	0	glycogen synthase kinase 3 beta
Pre-frontal cortex	Streptozocin	P49803	Rgs7	477	55638.1	24	192	167	0.4927	0.0001808	55.101	19	regulator of G-protein signaling 7
Pre-frontal cortex	Streptozocin	ENSRNOT00000067188	Hnrnph1	184	20549.3	8	74	0	0.4293	0.0001807	17.897	0	heterogeneous nuclear ribonucleoprotein H1
Pre-frontal cortex	Streptozocin	ENSRNOT00000019524	Plcxd3	321	36246.4	10	129	129	0.4268	0.0001805	25.833	10	phosphatidylinositol-specific phospholipase C, X domain containing 3
Pre-frontal cortex	Streptozocin	ENSRNOT00000056173	Phgdh	533	56439.2	21	214	192	0.4053	0.0001804	51.594	19	phosphoglycerate dehydrogenase
Pre-frontal cortex	Streptozocin	Q6P7B0	Wars1 Wars	481	54090.9	21	193	193	0.499	0.0001803	53.414	21	Tryptophan--tRNA ligase, cytoplasmic, EC 6.1.1.2 (Tryptophanyl-tRNA synthetase, TrpRS) [Cleaved into: T1-TrpRS; T2-TrpRS ]
Pre-frontal cortex	Streptozocin	ENSRNOT00000020402	Sae1	349	38470.5	10	140	140	0.3868	0.0001802	26.072	10	SUMO1 activating enzyme subunit 1
Pre-frontal cortex	Streptozocin	ENSRNOT00000044613	Hyou1	998	111133	38	400	11	0.4699	0.0001801	99.441	2	hypoxia up-regulated 1
Pre-frontal cortex	Streptozocin	ENSRNOT00000039777	Fbxl16	479	51799.6	19	192	192	0.5595	0.0001801	48.074	19	F-box and leucine-rich repeat protein 16
Pre-frontal cortex	Streptozocin	ENSRNOT00000076164	Ddx17	652	72581.1	30	261	148	0.4218	0.0001798	65.044	18	DEAD-box helicase 17
Pre-frontal cortex	Streptozocin	Q5BJP3	Ufm1	85	9093.9	3	34	34	0.6	0.0001797	7.458	3	ubiquitin-fold modifier 1
Pre-frontal cortex	Streptozocin	P62850-2	Rps24	130	15041.2	5	52	0	0.3	0.0001797	12.172	0	40S ribosomal protein S24
Pre-frontal cortex	Streptozocin	ENSRNOT00000091471	Cops3	423	47810	17	169	169	0.5721	0.0001795	45.773	17	COP9 signalosome subunit 3
Pre-frontal cortex	Streptozocin	ENSRNOT00000001409	Timm44	213	22930.6	11	85	0	0	0.0001793	25.107	0	translocase of inner mitochondrial membrane 44
Pre-frontal cortex	Streptozocin	ENSRNOT00000026960	Sgta	314	34117.8	9	125	125	0.3471	0.0001789	24.061	9	small glutamine rich tetratricopeptide repeat co-chaperone alpha
Pre-frontal cortex	Streptozocin	ENSRNOT00000067866	Tom1l2	284	30635.1	12	113	0	0.5211	0.0001788	34.722	0	target of myb1 like 2 membrane trafficking protein
Pre-frontal cortex	Streptozocin	Q01062	Pde2a	928	104579	41	369	0	0.5334	0.0001786	104.085	0	phosphodiesterase 2A
Pre-frontal cortex	Streptozocin	ENSRNOT00000013588	Rps24	131	15169.3	5	52	0	0.2977	0.0001783	12.172	0	ribosomal protein S24
Pre-frontal cortex	Streptozocin	P62850-3	Rps24	131	15169.3	5	52	0	0.2977	0.0001783	12.172	0	40S ribosomal protein S24
Pre-frontal cortex	Streptozocin	ENSRNOT00000084218	Cask	770	87839.6	30	305	0	0.4403	0.000178	71.518	0	calcium/calmodulin dependent serine protein kinase
Pre-frontal cortex	Streptozocin	ENSRNOT00000084870	Abracl	81	9006.8	3	32	32	0.2716	0.0001775	7.091	3	ABRA C-terminal like
Pre-frontal cortex	Streptozocin	ENSRNOT00000026586	Pde2a	935	105149	41	369	0	0.5294	0.0001773	104.085	0	phosphodiesterase 2A
Pre-frontal cortex	Streptozocin	O88761	Psmd1	953	105663	41	376	0	0.5257	0.0001773	100.143	0	proteasome 26S subunit, non-ATPase 1
Pre-frontal cortex	Streptozocin	ENSRNOT00000067813	Gapdhs	432	46673.8	15	170	0	0.0856	0.0001768	33.804	0	glyceraldehyde-3-phosphate dehydrogenase, spermatogenic
Pre-frontal cortex	Streptozocin	ENSRNOT00000091456	Prep	709	80422.7	29	279	0	0.5444	0.0001768	71.116	0	prolyl endopeptidase
Pre-frontal cortex	Streptozocin	ENSRNOT00000088037	Pspc1	465	52827.5	17	183	0	0.3785	0.0001768	41.574	0	paraspeckle component 1
Pre-frontal cortex	Streptozocin	ENSRNOT00000084261	Rab5al1	61	6529.4	2	24	0	0.2787	0.0001768	3.775	0	Rab5a, member RAS oncogene family-like 1
Pre-frontal cortex	Streptozocin	Q9ESV6	Gapdhs	432	46659.8	15	170	0	0.0856	0.0001768	33.804	0	glyceraldehyde-3-phosphate dehydrogenase, spermatogenic
Pre-frontal cortex	Streptozocin	ENSRNOT00000045326	Capn2	506	57066.1	16	199	0	0.3814	0.0001767	44.005	0	calpain 2
Pre-frontal cortex	Streptozocin	Q62813-2	Lsamp Lamp	361	39818.6	14	142	0	0.385	0.0001767	34.156	0	Limbic system-associated membrane protein, LSAMP
Pre-frontal cortex	Streptozocin	ENSRNOT00000009490	LOC297756	229	26511.1	8	90	0	0.3406	0.0001766	20.168	0	ribosomal protein S8-like
Pre-frontal cortex	Streptozocin	ENSRNOT00000007498	Gna11	359	41999.5	16	141	0	0.4345	0.0001765	33.848	0	G protein subunit alpha 11
Pre-frontal cortex	Streptozocin	Q9JID2	Gna11	359	41981.5	16	141	0	0.4345	0.0001765	33.848	0	G protein subunit alpha 11
Pre-frontal cortex	Streptozocin	ENSRNOT00000022971	Lhpp	270	29153.7	10	106	106	0.4778	0.0001764	23.158	10	phospholysine phosphohistidine inorganic pyrophosphate phosphatase
Pre-frontal cortex	Streptozocin	ENSRNOT00000077270	Tpd52	247	26848.3	8	97	12	0.4008	0.0001764	23.058	1	tumor protein D52
Pre-frontal cortex	Streptozocin	ENSRNOT00000001581	Gltp	209	23670.4	8	82	82	0.4976	0.0001763	15.923	8	glycolipid transfer protein
Pre-frontal cortex	Streptozocin	Q9R0I8	Pip4k2a	406	46162.5	18	159	63	0.3054	0.0001759	39.006	9	phosphatidylinositol-5-phosphate 4-kinase type 2 alpha
Pre-frontal cortex	Streptozocin	ENSRNOT00000091448	Ddx3x	662	73082	29	259	69	0.4109	0.0001758	68.054	2	DEAD-box helicase 3, X-linked
Pre-frontal cortex	Streptozocin	ENSRNOT00000015281	Aldh1b1	519	57604.4	21	203	0	0.5183	0.0001757	53.803	0	aldehyde dehydrogenase 1 family, member B1
Pre-frontal cortex	Streptozocin	Q66HF8	Aldh1b1	519	57570.4	21	203	0	0.5183	0.0001757	53.803	0	aldehyde dehydrogenase 1 family, member B1
Pre-frontal cortex	Streptozocin	P62850	Rps24	133	15395.4	5	52	0	0.2932	0.0001757	12.172	0	ribosomal protein S24
Pre-frontal cortex	Streptozocin	ENSRNOT00000068493	Dlg4	724	80397.7	31	283	10	0.5083	0.0001756	77.44	1	discs large MAGUK scaffold protein 4
Pre-frontal cortex	Streptozocin	ENSRNOT00000015579	Cnn3	330	36393.7	14	129	129	0.603	0.0001756	36.964	14	calponin 3
Pre-frontal cortex	Streptozocin	ENSRNOT00000074236	NA	110	12098.2	3	43	0	0.1091	0.0001756	8.147	0	NA
Pre-frontal cortex	Streptozocin	ENSRNOT00000076503	Dlg3	512	57934.6	20	200	0	0.4688	0.0001755	52.798	0	discs large MAGUK scaffold protein 3
Pre-frontal cortex	Streptozocin	ENSRNOT00000008913	Alg2	415	47270.3	19	162	162	0.5566	0.0001754	46.491	19	ALG2, alpha-1,3/1,6-mannosyltransferase
Pre-frontal cortex	Streptozocin	ENSRNOT00000020399	LOC688754	282	30586.5	12	110	0	0.6241	0.0001752	36.094	0	similar to Voltage-dependent anion-selective channel protein 1 (VDAC-1) (mVDAC1) (mVDAC5) (Outer mitochondrial membrane protein porin 1) (Plasmalemmal porin)
Pre-frontal cortex	Streptozocin	Q4V8B0-2	Oxr1 C7	331	37722.2	13	129	0	0.3867	0.0001751	35.869	0	Oxidation resistance protein 1 (Protein C7)
Pre-frontal cortex	Streptozocin	ENSRNOT00000083191	Nudcd3	172	18923.8	5	67	67	0.4012	0.000175	11.677	5	NudC domain containing 3
Pre-frontal cortex	Streptozocin	Q63617	Hyou1	999	111202	36	389	0	0.4394	0.0001749	96.641	0	hypoxia up-regulated 1
Pre-frontal cortex	Streptozocin	Q8K586	Rasl2-9	216	24417.5	8	84	0	0.2963	0.0001747	19.023	0	RAS-like, family 2, locus 9
Pre-frontal cortex	Streptozocin	D4AAZ6	Rpl37a	72	8039.2	2	28	0	0.2778	0.0001747	4.056	0	ribosomal protein L37a
Pre-frontal cortex	Streptozocin	ENSRNOT00000074515	Syncrip	562	62615.3	18	218	40	0.3381	0.0001743	47.822	3	synaptotagmin binding, cytoplasmic RNA interacting protein
Pre-frontal cortex	Streptozocin	P56558	Ogt	1036	115514	41	402	0	0.473	0.0001743	99.643	0	O-linked N-acetylglucosamine (GlcNAc) transferase
Pre-frontal cortex	Streptozocin	ENSRNOT00000077362	Ilf2	390	43017.2	14	151	66	0.6256	0.000174	39.35	4	interleukin enhancer binding factor 2
Pre-frontal cortex	Streptozocin	ENSRNOT00000072973	Vbp1	186	20897.7	4	72	72	0.3387	0.0001739	13.253	4	VHL binding protein 1
Pre-frontal cortex	Streptozocin	ENSRNOT00000017417	Epb41l2	698	77691.9	28	270	0	0.4212	0.0001738	69.585	0	erythrocyte membrane protein band 4.1-like 2
Pre-frontal cortex	Streptozocin	P00762	Prss1	246	25924.7	6	95	72	0.126	0.0001735	14.536	4	serine protease 1
Pre-frontal cortex	Streptozocin	ENSRNOT00000071153	Prkar1a	381	43050	14	147	111	0.336	0.0001733	29.005	10	protein kinase cAMP-dependent type I regulatory subunit alpha
Pre-frontal cortex	Streptozocin	ENSRNOT00000047840	Hnrnpd	353	38176.2	13	136	0	0.2465	0.0001731	29.704	0	heterogeneous nuclear ribonucleoprotein D
Pre-frontal cortex	Streptozocin	ENSRNOT00000010061	Dnaja1	397	44821.4	15	153	153	0.5013	0.0001731	36.434	15	DnaJ heat shock protein family (Hsp40) member A1
Pre-frontal cortex	Streptozocin	ENSRNOT00000026921	Stub1	304	34846.3	15	117	117	0.5296	0.0001729	32.548	15	STIP1 homology and U-box containing protein 1
Pre-frontal cortex	Streptozocin	ENSRNOT00000022319	Slc1a3	543	59626.7	21	209	0	0.232	0.0001729	52.585	0	solute carrier family 1 member 3
Pre-frontal cortex	Streptozocin	P24942	Slc1a3	543	59640.7	21	209	0	0.232	0.0001729	52.585	0	solute carrier family 1 member 3
Pre-frontal cortex	Streptozocin	P11506-14	Atp2b2	1198	132513	45	461	0	0.4182	0.0001729	117.233	0	Plasma membrane calcium-transporting ATPase 2, PMCA2, EC 7.2.2.10 (Plasma membrane calcium ATPase isoform 2) (Plasma membrane calcium pump isoform 2)
Pre-frontal cortex	Streptozocin	P46418	Gsta3	221	25313.1	6	85	0	0.1946	0.0001728	13.25	0	glutathione S-transferase alpha 3
Pre-frontal cortex	Streptozocin	P41123	Rpl13	211	24276.4	10	81	28	0.3033	0.0001725	21.037	2	ribosomal protein L13
Pre-frontal cortex	Streptozocin	P06302	Ptma	112	12357.1	6	43	29	0.2232	0.0001725	10.262	4	prothymosin alpha
Pre-frontal cortex	Streptozocin	ENSRNOT00000079327	Pip4k2c	420	47000.9	16	161	0	0.381	0.0001722	37.744	0	phosphatidylinositol-5-phosphate 4-kinase type 2 gamma
Pre-frontal cortex	Streptozocin	ENSRNOT00000067774	Pip4k2c	421	47300.1	16	161	0	0.38	0.0001718	37.744	0	phosphatidylinositol-5-phosphate 4-kinase type 2 gamma
Pre-frontal cortex	Streptozocin	ENSRNOT00000026528	Rps5	204	22874.1	6	78	32	0.3676	0.0001718	16.249	1	ribosomal protein S5
Pre-frontal cortex	Streptozocin	ENSRNOT00000003106	Hnrnpdl	322	35254.2	10	123	0	0.2733	0.0001716	25.638	0	heterogeneous nuclear ribonucleoprotein D-like
Pre-frontal cortex	Streptozocin	ENSRNOT00000065275	Czib	160	18064.9	6	61	61	0.3812	0.0001713	13.42	6	CXXC motif containing zinc binding protein
Pre-frontal cortex	Streptozocin	ENSRNOT00000083068	Clta	236	25546.4	11	90	0	0.3814	0.0001713	21.572	0	clathrin, light chain A
Pre-frontal cortex	Streptozocin	ENSRNOT00000041238	Klc2	622	68551.1	23	237	145	0.4212	0.0001712	55.268	15	kinesin light chain 2
Pre-frontal cortex	Streptozocin	ENSRNOT00000005286	Nap1l1	391	45326.9	16	149	25	0.4194	0.0001712	45.32	1	nucleosome assembly protein 1-like 1
Pre-frontal cortex	Streptozocin	P11505-6	Atp2b1	1184	130525	46	451	0	0.3784	0.0001711	122.188	0	Plasma membrane calcium-transporting ATPase 1, EC 7.2.2.10 (Plasma membrane calcium ATPase isoform 1, PMCA1) (Plasma membrane calcium pump isoform 1)
Pre-frontal cortex	Streptozocin	ENSRNOT00000071997	LOC688672	405	45953.3	19	154	1	0.3531	0.0001708	39.232	1	similar to eukaryotic translation initiation factor 4A, isoform 1
Pre-frontal cortex	Streptozocin	ENSRNOT00000020670	Atp5f1d	229	23953.6	8	87	0	0.4236	0.0001707	22.319	0	ATP synthase F1 subunit delta
Pre-frontal cortex	Streptozocin	P41498-2	Acp1	158	17907.8	10	60	0	0.6582	0.0001706	23.931	0	Low molecular weight phosphotyrosine protein phosphatase, LMW-PTP, LMW-PTPase, EC 3.1.3.48 (Low molecular weight cytosolic acid phosphatase, EC 3.1.3.2)
Pre-frontal cortex	Streptozocin	ENSRNOT00000039410	Scai	606	70226.8	22	230	230	0.4323	0.0001705	48.107	22	suppressor of cancer cell invasion
Pre-frontal cortex	Streptozocin	ENSRNOT00000015327	Tpd52	224	24236	7	85	0	0.3884	0.0001705	20.573	0	tumor protein D52
Pre-frontal cortex	Streptozocin	Q63666-3	Vamp1 Syb1	116	12532.4	3	44	0	0.2845	0.0001704	8.473	0	Vesicle-associated membrane protein 1, VAMP-1 (Synaptobrevin-1)
Pre-frontal cortex	Streptozocin	Q09167-2	Srsf5 Cl-4 Hrs Sfrs5	124	14410.3	3	47	0	0.2581	0.0001703	7.643	0	Serine/arginine-rich splicing factor 5 (Delayed-early protein HRS) (Insulin-induced growth response protein CL-4) (Pre-mRNA-splicing factor SRP40) (Splicing factor, arginine/serine-rich 5)
Pre-frontal cortex	Streptozocin	ENSRNOT00000072648	NA	66	7453.7	2	25	0	0.1818	0.0001702	3.001	0	NA
Pre-frontal cortex	Streptozocin	ENSRNOT00000046110	Srr	333	35652.7	10	126	47	0.5045	0.00017	31.157	4	serine racemase
Pre-frontal cortex	Streptozocin	Q812E9-2	Gpm6a m6a	267	29852.8	10	101	0	0.2285	0.00017	23.02	0	Neuronal membrane glycoprotein M6-a, M6a
Pre-frontal cortex	Streptozocin	ENSRNOT00000034810	LOC100360057	127	14562.7	4	48	0	0.3937	0.0001698	13.921	0	ribosomal protein L22-like
Pre-frontal cortex	Streptozocin	ENSRNOT00000001186	NA	246	27206.6	7	93	0	0.252	0.0001698	16.264	0	NA
Pre-frontal cortex	Streptozocin	Q4KM74	Sec22b	215	24706.7	8	81	81	0.4419	0.0001693	23.323	8	SEC22 homolog B, vesicle trafficking protein
Pre-frontal cortex	Streptozocin	ENSRNOT00000014780	Gars	728	81722.7	32	274	274	0.4698	0.0001691	79.622	32	glycyl-tRNA synthetase
Pre-frontal cortex	Streptozocin	ENSRNOT00000030228	Nmt2	529	60414.9	16	199	132	0.4386	0.000169	41.457	11	N-myristoyltransferase 2
Pre-frontal cortex	Streptozocin	ENSRNOT00000013763	Dcps	335	38552.1	9	126	9	0.406	0.000169	23.907	2	decapping enzyme, scavenger
Pre-frontal cortex	Streptozocin	ENSRNOT00000045933	LOC100362583	202	23287.3	9	76	0	0.3366	0.000169	14.649	0	ribosomal protein L13a-like
Pre-frontal cortex	Streptozocin	ENSRNOT00000020845	Atp6v1e2	226	26525.9	8	85	0	0.1637	0.000169	21.956	0	ATPase H+ transporting V1 subunit E2
Pre-frontal cortex	Streptozocin	ENSRNOT00000086141	AABR07025928.1	117	12718.8	5	44	0	0.2222	0.000169	10.474	0	Uncharacterized protein
Pre-frontal cortex	Streptozocin	Q63666-2	Vamp1 Syb1	117	12667.5	3	44	0	0.2821	0.000169	8.473	0	Vesicle-associated membrane protein 1, VAMP-1 (Synaptobrevin-1)
Pre-frontal cortex	Streptozocin	ENSRNOT00000076450	Dlg3	546	61747.4	21	205	0	0.4579	0.0001687	55.046	0	discs large MAGUK scaffold protein 3
Pre-frontal cortex	Streptozocin	ENSRNOT00000089141	Pak3	544	60654.7	22	204	47	0.4522	0.0001685	56.489	8	p21 (RAC1) activated kinase 3
Pre-frontal cortex	Streptozocin	ENSRNOT00000014904	Rpl22	128	14731.8	4	48	0	0.3906	0.0001685	13.921	0	ribosomal protein L22
Pre-frontal cortex	Streptozocin	ENSRNOT00000080274	Adk	403	44060	14	151	0	0.464	0.0001683	37.124	0	adenosine kinase
Pre-frontal cortex	Streptozocin	Q8K3E7	Dpy30	99	11175.7	2	37	0	0.2929	0.0001679	4.624	0	dpy-30 histone methyltransferase complex regulatory subunit
Pre-frontal cortex	Streptozocin	P42930	Hspb1 Hsp27	206	22860.6	12	77	0	0.6408	0.0001679	26.949	0	Heat shock protein beta-1, HspB1 (Heat shock 27 kDa protein, HSP 27)
Pre-frontal cortex	Streptozocin	Q64536	Pdk2	407	46058.1	17	152	0	0.5307	0.0001678	39.355	0	pyruvate dehydrogenase kinase 2
Pre-frontal cortex	Streptozocin	P13084-2	Npm1	257	28349.7	9	96	0	0.3307	0.0001678	21.252	0	Nucleophosmin, NPM (Nucleolar phosphoprotein B23) (Nucleolar protein NO38) (Numatrin)
Pre-frontal cortex	Streptozocin	O35952-2	Hagh Rsp29	260	28859.8	7	97	0	0.4192	0.0001676	16.977	0	Hydroxyacylglutathione hydrolase, mitochondrial, EC 3.1.2.6 (Glyoxalase II, Glx II) (Round spermatid protein RSP29)
Pre-frontal cortex	Streptozocin	ENSRNOT00000025081	Vamp1	118	12770.6	3	44	0	0.2797	0.0001675	8.473	0	vesicle-associated membrane protein 1
Pre-frontal cortex	Streptozocin	ENSRNOT00000077442	Acp1	161	18217	10	60	0	0.646	0.0001674	23.931	0	acid phosphatase 1
Pre-frontal cortex	Streptozocin	ENSRNOT00000025986	Naxe	282	30852.7	11	105	105	0.461	0.0001673	26.828	11	NAD(P)HX epimerase
Pre-frontal cortex	Streptozocin	ENSRNOT00000092645	Srsf3	129	14929.5	6	48	0	0.2713	0.0001672	12.184	0	serine and arginine rich splicing factor 3
Pre-frontal cortex	Streptozocin	ENSRNOT00000090786	Iars2	1011	112587	34	376	26	0.4362	0.0001671	83.509	2	isoleucyl-tRNA synthetase 2, mitochondrial
Pre-frontal cortex	Streptozocin	ENSRNOT00000041216	Itih3	887	98987.7	30	330	0	0.3337	0.0001671	72.025	0	inter-alpha trypsin inhibitor, heavy chain 3
Pre-frontal cortex	Streptozocin	Q63692	Cdc37	379	44463.9	14	141	20	0.3536	0.0001671	33.315	1	cell division cycle 37, HSP90 cochaperone
Pre-frontal cortex	Streptozocin	Q63416	Itih3	887	99017.6	30	330	0	0.3337	0.0001671	72.025	0	inter-alpha trypsin inhibitor, heavy chain 3
Pre-frontal cortex	Streptozocin	ENSRNOT00000030569	Chordc1	331	37319.7	14	123	123	0.5529	0.000167	36.599	14	cysteine and histidine rich domain containing 1
Pre-frontal cortex	Streptozocin	ENSRNOT00000076640	Prep	530	59402	21	197	0	0.5321	0.000167	52.236	0	prolyl endopeptidase
Pre-frontal cortex	Streptozocin	ENSRNOT00000035252	Elavl4	385	42323.4	17	143	45	0.4961	0.0001669	38.987	6	ELAV like RNA binding protein 4
Pre-frontal cortex	Streptozocin	ENSRNOT00000005471	Rpl23	140	14838.1	6	52	52	0.4429	0.0001669	12.639	6	ribosomal protein L23
Pre-frontal cortex	Streptozocin	ENSRNOT00000092818	Grhpr	35	3563	1	13	0	0.3429	0.0001669	2.82	0	glyoxylate and hydroxypyruvate reductase
Pre-frontal cortex	Streptozocin	ENSRNOT00000090959	Pde2a	916	103192	40	340	0	0.5055	0.0001668	101.029	0	phosphodiesterase 2A
Pre-frontal cortex	Streptozocin	ENSRNOT00000021017	Eif3f	361	37955.3	9	134	134	0.3407	0.0001668	23.689	9	eukaryotic translation initiation factor 3, subunit F
Pre-frontal cortex	Streptozocin	ENSRNOT00000023613	Gmpr	345	37415.8	13	128	27	0.5681	0.0001667	30.506	1	guanosine monophosphate reductase
Pre-frontal cortex	Streptozocin	P11506	Atp2b2	1243	136706	45	461	0	0.4031	0.0001666	117.233	0	ATPase plasma membrane Ca2+ transporting 2
Pre-frontal cortex	Streptozocin	ENSRNOT00000018934	Acat2l1	397	41393.3	11	147	0	0.3854	0.0001664	31.346	0	acetyl-CoA acetyltransferase 2-like 1
Pre-frontal cortex	Streptozocin	ENSRNOT00000076951	Acat2l1	397	41244.1	11	147	0	0.3854	0.0001664	31.346	0	acetyl-CoA acetyltransferase 2-like 1
Pre-frontal cortex	Streptozocin	P15650	Acadl	430	47824.4	17	159	159	0.4512	0.0001661	44.595	17	acyl-CoA dehydrogenase, long chain
Pre-frontal cortex	Streptozocin	P11505	Atp2b1	1220	134590	46	451	0	0.3672	0.0001661	122.188	0	ATPase plasma membrane Ca2+ transporting 1
Pre-frontal cortex	Streptozocin	ENSRNOT00000011480	NA	165	17139.6	8	61	0	0.3333	0.0001661	14.525	0	NA
Pre-frontal cortex	Streptozocin	ENSRNOT00000017998	Ppt1	306	34414.3	13	113	103	0.4412	0.0001659	33.52	12	palmitoyl-protein thioesterase 1
Pre-frontal cortex	Streptozocin	ENSRNOT00000087133	Cadm2	374	40705.7	10	138	0	0.4171	0.0001658	29.982	0	cell adhesion molecule 2
Pre-frontal cortex	Streptozocin	ENSRNOT00000010210	Cse1l	971	110126	39	358	358	0.5221	0.0001656	85.882	39	chromosome segregation 1 like
Pre-frontal cortex	Streptozocin	ENSRNOT00000049862	Pak2	524	57905.8	22	193	53	0.4523	0.0001655	50.673	11	Serine/threonine-protein kinase PAK 2, EC 2.7.11.1 (Gamma-PAK) (p21-activated kinase 2, PAK-2) [Cleaved into: PAK-2p27; PAK-2p34 ]
Pre-frontal cortex	Streptozocin	ENSRNOT00000016129	Sgtb	304	33448.3	9	112	112	0.5066	0.0001655	25.556	9	small glutamine rich tetratricopeptide repeat co-chaperone beta
Pre-frontal cortex	Streptozocin	ENSRNOT00000013609	Gid8	228	26743.6	8	84	71	0.4474	0.0001655	20.988	7	GID complex subunit 8 homolog
Pre-frontal cortex	Streptozocin	Q63532	Sprr1a Spr Sprr1	152	16704.1	5	56	56	0.5066	0.0001655	9.405	5	Cornifin-A (Small proline-rich protein 1A, SPR1A, SPRR1)
Pre-frontal cortex	Streptozocin	Q63945-2	Set Ab1-115	277	32067.7	8	102	0	0.3538	0.0001654	26.936	0	Protein SET (Liver regeneration-related protein LRRGR00002) (Phosphatase 2A inhibitor I2PP2A, I-2PP2A) (Template-activating factor I, TAF-I)
Pre-frontal cortex	Streptozocin	Q63622	Dlg2	852	94857.3	35	313	0	0.4495	0.0001651	83.555	0	discs large MAGUK scaffold protein 2
Pre-frontal cortex	Streptozocin	ENSRNOT00000043719	Hbe1	147	16076.5	5	54	0	0.1224	0.000165	9.845	0	hemoglobin subunit epsilon 1
Pre-frontal cortex	Streptozocin	ENSRNOT00000024850	Trim3	744	80691.9	23	273	23	0.422	0.0001649	57.591	3	tripartite motif-containing 3
Pre-frontal cortex	Streptozocin	ENSRNOT00000078822	Camk4	474	53099.7	18	174	134	0.443	0.0001649	45.047	12	calcium/calmodulin-dependent protein kinase IV
Pre-frontal cortex	Streptozocin	ENSRNOT00000020908	Nol3	221	24458.3	7	81	0	0.5611	0.0001647	21.067	0	nucleolar protein 3
Pre-frontal cortex	Streptozocin	Q62881	Nol3	221	24543.4	7	81	0	0.5611	0.0001647	21.067	0	nucleolar protein 3
Pre-frontal cortex	Streptozocin	Q62718	Ntm	344	37956.4	12	126	0	0.4302	0.0001646	33.236	0	neurotrimin
Pre-frontal cortex	Streptozocin	P11506-8	Atp2b2	1212	133946	43	444	0	0.3845	0.0001646	112.077	0	Plasma membrane calcium-transporting ATPase 2, PMCA2, EC 7.2.2.10 (Plasma membrane calcium ATPase isoform 2) (Plasma membrane calcium pump isoform 2)
Pre-frontal cortex	Streptozocin	ENSRNOT00000071804	Homer1	366	41261.8	17	134	12	0.4754	0.0001645	40.71	1	homer scaffold protein 1
Pre-frontal cortex	Streptozocin	ENSRNOT00000016499	S100a16	123	14196.8	3	45	45	0.2846	0.0001644	8.134	3	S100 calcium binding protein A16
Pre-frontal cortex	Streptozocin	ENSRNOT00000040156	Tomm34	309	34421.8	14	113	113	0.4304	0.0001643	31.071	14	translocase of outer mitochondrial membrane 34
Pre-frontal cortex	Streptozocin	ENSRNOT00000050030	RGD1306195	216	24416.6	9	79	0	0.375	0.0001643	19.161	0	similar to RAN protein
Pre-frontal cortex	Streptozocin	ENSRNOT00000035454	Ntm	339	37579.3	11	124	0	0.413	0.0001643	31.608	0	neurotrimin
Pre-frontal cortex	Streptozocin	ENSRNOT00000013184	Dync1i1	643	72614.5	20	235	23	0.4681	0.0001642	56.886	1	dynein cytoplasmic 1 intermediate chain 1
Pre-frontal cortex	Streptozocin	ENSRNOT00000091023	Abi1	476	51654.9	16	174	0	0.3277	0.0001642	43.358	0	abl-interactor 1
Pre-frontal cortex	Streptozocin	P84817-3	Fis1 Ttc11	145	16222.5	6	53	0	0.4138	0.0001642	12.043	0	Mitochondrial fission 1 protein (FIS1 homolog, rFis1) (Tetratricopeptide repeat protein 11, TPR repeat protein 11)
Pre-frontal cortex	Streptozocin	ENSRNOT00000061826	Prepl	726	83410	26	265	0	0.4463	0.000164	67.011	0	prolyl endopeptidase-like
Pre-frontal cortex	Streptozocin	P11505-4	Atp2b1	1249	137677	48	456	1	0.3763	0.000164	127.093	1	Plasma membrane calcium-transporting ATPase 1, EC 7.2.2.10 (Plasma membrane calcium ATPase isoform 1, PMCA1) (Plasma membrane calcium pump isoform 1)
Pre-frontal cortex	Streptozocin	ENSRNOT00000004046	Nmt1	496	56805.9	17	181	114	0.371	0.0001639	40.706	12	N-myristoyltransferase 1
Pre-frontal cortex	Streptozocin	ENSRNOT00000012260	Nans	359	40007.4	12	131	131	0.4513	0.0001639	33.787	12	N-acetylneuraminate synthase
Pre-frontal cortex	Streptozocin	Q9QY17-2	Pacsin2	447	51488.1	21	163	0	0.5481	0.0001638	47.739	0	Protein kinase C and casein kinase substrate in neurons 2 protein (Synaptic dynamin-associated protein II) (Syndapin-2) (Syndapin-II, SdpII)
Pre-frontal cortex	Streptozocin	Q9JJP9	Ubqln1	582	62014.3	19	212	0	0.4192	0.0001637	50.723	0	ubiquilin 1
Pre-frontal cortex	Streptozocin	Q63622-2	Dlg2 Dlgh2	859	95507.5	35	313	0	0.4459	0.0001637	83.555	0	Disks large homolog 2 (Channel-associated protein of synapse-110, Chapsyn-110) (Postsynaptic density protein PSD-93)
Pre-frontal cortex	Streptozocin	P50503	St13	368	41235.4	11	134	16	0.2582	0.0001636	28.795	2	ST13, Hsp70 interacting protein
Pre-frontal cortex	Streptozocin	ENSRNOT00000046984	AABR07025074.1	206	24079.1	5	75	0	0.1408	0.0001636	14.258	0	HMG box domain-containing protein
Pre-frontal cortex	Streptozocin	ENSRNOT00000073746	Pnpo	261	30147	11	95	95	0.5441	0.0001635	25.41	11	pyridoxamine 5'-phosphate oxidase
Pre-frontal cortex	Streptozocin	ENSRNOT00000037199	Arpp21	88	9625.8	4	32	3	0.5568	0.0001634	8.766	1	cAMP regulated phosphoprotein 21
Pre-frontal cortex	Streptozocin	Q63622-6	Dlg2 Dlgh2	831	92902.3	33	302	0	0.426	0.0001633	79.245	0	Disks large homolog 2 (Channel-associated protein of synapse-110, Chapsyn-110) (Postsynaptic density protein PSD-93)
Pre-frontal cortex	Streptozocin	ENSRNOT00000092968	Gpm6a	278	31156.4	10	101	0	0.2194	0.0001632	23.02	0	glycoprotein m6a
Pre-frontal cortex	Streptozocin	ENSRNOT00000027937	Psmd8	353	39833.9	13	128	128	0.4278	0.0001629	27.74	13	proteasome 26S subunit, non-ATPase 8
Pre-frontal cortex	Streptozocin	ENSRNOT00000084166	Ppp3cc	483	55126.1	16	175	0	0.1387	0.0001628	31.861	0	protein phosphatase 3 catalytic subunit gamma
Pre-frontal cortex	Streptozocin	P08081-2	Clta	218	23533.4	10	79	0	0.3761	0.0001628	19.687	0	Clathrin light chain A, Lca
Pre-frontal cortex	Streptozocin	ENSRNOT00000003987	Mapk9	381	43859.2	17	138	0	0.4541	0.0001627	33.487	0	mitogen-activated protein kinase 9
Pre-frontal cortex	Streptozocin	P11506-6	Atp2b2	1226	135353	43	444	0	0.3801	0.0001627	112.077	0	Plasma membrane calcium-transporting ATPase 2, PMCA2, EC 7.2.2.10 (Plasma membrane calcium ATPase isoform 2) (Plasma membrane calcium pump isoform 2)
Pre-frontal cortex	Streptozocin	ENSRNOT00000013375	Eif2s1	315	36067.4	18	114	114	0.5524	0.0001626	37.976	18	eukaryotic translation initiation factor 2 subunit alpha
Pre-frontal cortex	Streptozocin	Q6AYQ8	Fahd1	221	24446.6	9	80	80	0.448	0.0001626	20.784	9	fumarylacetoacetate hydrolase domain containing 1
Pre-frontal cortex	Streptozocin	ENSRNOT00000016504	Abhd14b	210	22585.7	8	76	16	0.4	0.0001626	18.069	1	abhydrolase domain containing 14b
Pre-frontal cortex	Streptozocin	ENSRNOT00000057572	Abi1	481	52281.3	16	174	0	0.3243	0.0001625	43.358	0	abl-interactor 1
Pre-frontal cortex	Streptozocin	P11505-1	Atp2b1	1258	138614	47	455	0	0.3736	0.0001625	125.593	0	Plasma membrane calcium-transporting ATPase 1, EC 7.2.2.10 (Plasma membrane calcium ATPase isoform 1, PMCA1) (Plasma membrane calcium pump isoform 1)
Pre-frontal cortex	Streptozocin	P11505-5	Atp2b1	1171	128976	44	422	0	0.3638	0.0001619	118.599	0	Plasma membrane calcium-transporting ATPase 1, EC 7.2.2.10 (Plasma membrane calcium ATPase isoform 1, PMCA1) (Plasma membrane calcium pump isoform 1)
Pre-frontal cortex	Streptozocin	Q63507	Rpl14	214	23306	8	77	0	0.2757	0.0001617	16.698	0	60S ribosomal protein L14
Pre-frontal cortex	Streptozocin	ENSRNOT00000075922	Fyn	395	44855.8	11	142	0	0.3519	0.0001615	24.418	0	FYN proto-oncogene, Src family tyrosine kinase
Pre-frontal cortex	Streptozocin	Q5M9I5	Uqcrh	89	10399	2	32	32	0.4157	0.0001615	7.915	2	ubiquinol-cytochrome c reductase hinge protein
Pre-frontal cortex	Streptozocin	P11505-2	Atp2b1	1176	129410	44	422	0	0.3622	0.0001612	118.599	0	Plasma membrane calcium-transporting ATPase 1, EC 7.2.2.10 (Plasma membrane calcium ATPase isoform 1, PMCA1) (Plasma membrane calcium pump isoform 1)
Pre-frontal cortex	Streptozocin	P12007	Ivd	424	46387.7	16	152	152	0.5377	0.0001611	39.223	16	isovaleryl-CoA dehydrogenase
Pre-frontal cortex	Streptozocin	ENSRNOT00000001856	Rasal1	801	89522.9	37	287	286	0.4969	0.000161	82.516	36	RAS protein activator like 1
Pre-frontal cortex	Streptozocin	ENSRNOT00000028589	Psmd4	380	41029.4	12	136	136	0.4	0.0001608	33.894	12	proteasome 26S subunit ubiquitin receptor, non-ATPase 4
Pre-frontal cortex	Streptozocin	ENSRNOT00000087043	Kcnab2	383	42759.9	15	137	0	0.4413	0.0001607	38.854	0	potassium voltage-gated channel subfamily A regulatory beta subunit 2
Pre-frontal cortex	Streptozocin	P40329	Rars1	660	75744	29	236	236	0.5379	0.0001607	66.052	29	arginyl-tRNA synthetase 1
Pre-frontal cortex	Streptozocin	ENSRNOT00000019107	Manf	179	20356.6	9	64	64	0.4637	0.0001606	21.315	9	mesencephalic astrocyte-derived neurotrophic factor
Pre-frontal cortex	Streptozocin	P11506-7	Atp2b2	1243	136733	43	444	0	0.3749	0.0001605	112.077	0	Plasma membrane calcium-transporting ATPase 2, PMCA2, EC 7.2.2.10 (Plasma membrane calcium ATPase isoform 2) (Plasma membrane calcium pump isoform 2)
Pre-frontal cortex	Streptozocin	B1WC61	Acad9	625	68781.7	24	223	223	0.5008	0.0001603	52.605	24	acyl-CoA dehydrogenase family, member 9
Pre-frontal cortex	Streptozocin	ENSRNOT00000067776	Dmtn	320	35650.1	14	114	0	0.4312	0.0001601	32.836	0	dematin actin binding protein
Pre-frontal cortex	Streptozocin	ENSRNOT00000028188	Ddb1	1140	126842	45	406	23	0.3439	0.00016	101.912	2	damage-specific DNA binding protein 1
Pre-frontal cortex	Streptozocin	ENSRNOT00000037752	Ppp1r1b	205	22880.8	9	73	73	0.4293	0.00016	22.036	9	protein phosphatase 1, regulatory (inhibitor) subunit 1B
Pre-frontal cortex	Streptozocin	Q9WTP0-2	Epb41l1 Epb4.1l1	1551	170888	49	552	1	0.3005	0.0001599	122.516	1	Band 4.1-like protein 1 (Erythrocyte membrane protein band 4.1-like 1) (Neuronal protein 4.1, 4.1N)
Pre-frontal cortex	Streptozocin	ENSRNOT00000012026	Tln2	1457	153705	50	518	0	0.5484	0.0001597	139.546	0	talin 2
Pre-frontal cortex	Streptozocin	P97615	Txn2	166	18202.5	5	59	59	0.4518	0.0001597	13.954	5	thioredoxin 2
Pre-frontal cortex	Streptozocin	ENSRNOT00000001924	Fis1	152	16965.9	7	54	1	0.3947	0.0001596	13.775	1	fission, mitochondrial 1
Pre-frontal cortex	Streptozocin	ENSRNOT00000082353	Prepl	747	85814.2	26	265	0	0.4337	0.0001594	67.011	0	prolyl endopeptidase-like
Pre-frontal cortex	Streptozocin	ENSRNOT00000079688	Epb41l2	789	87735.4	30	280	0	0.403	0.0001594	72.753	0	erythrocyte membrane protein band 4.1-like 2
Pre-frontal cortex	Streptozocin	P97576	Grpel1	217	24263.8	6	77	0	0.2673	0.0001594	13.428	0	GrpE-like 1, mitochondrial
Pre-frontal cortex	Streptozocin	ENSRNOT00000009660	Prepl	748	86097.3	26	265	0	0.4332	0.0001592	67.011	0	prolyl endopeptidase-like
Pre-frontal cortex	Streptozocin	Q920L2	Sdha	656	71551.7	23	232	232	0.4497	0.0001589	61.371	23	succinate dehydrogenase complex flavoprotein subunit A
Pre-frontal cortex	Streptozocin	Q9WVK7	Hadh	314	34407.9	11	111	110	0.4713	0.0001588	28.426	10	hydroxyacyl-CoA dehydrogenase
Pre-frontal cortex	Streptozocin	P11506-1	Atp2b2	1257	138139	43	444	0	0.3707	0.0001587	112.077	0	Plasma membrane calcium-transporting ATPase 2, PMCA2, EC 7.2.2.10 (Plasma membrane calcium ATPase isoform 2) (Plasma membrane calcium pump isoform 2)
Pre-frontal cortex	Streptozocin	ENSRNOT00000051397	Set	289	33343.6	8	102	0	0.3391	0.0001586	26.936	0	SET nuclear proto-oncogene
Pre-frontal cortex	Streptozocin	Q63945	Set	289	33367.7	8	102	0	0.3391	0.0001586	26.936	0	SET nuclear proto-oncogene
Pre-frontal cortex	Streptozocin	Q63622-4	Dlg2 Dlgh2	887	97858.4	35	313	0	0.4318	0.0001585	83.555	0	Disks large homolog 2 (Channel-associated protein of synapse-110, Chapsyn-110) (Postsynaptic density protein PSD-93)
Pre-frontal cortex	Streptozocin	ENSRNOT00000015213	Aimp1	315	34534	13	111	111	0.5302	0.0001583	31.266	13	aminoacyl tRNA synthetase complex-interacting multifunctional protein 1
Pre-frontal cortex	Streptozocin	ENSRNOT00000036518	Gstt3	210	23348	7	74	61	0.3381	0.0001583	16.188	5	glutathione S-transferase, theta 3
Pre-frontal cortex	Streptozocin	ENSRNOT00000011330	Decr1	335	36091.7	11	118	0	0.3851	0.0001583	24.493	0	2,4-dienoyl-CoA reductase 1
Pre-frontal cortex	Streptozocin	Q64591	Decr1	335	36091.7	11	118	0	0.3851	0.0001583	24.493	0	2,4-dienoyl-CoA reductase 1
Pre-frontal cortex	Streptozocin	ENSRNOT00000084202	Sfpq	696	75021	20	245	232	0.296	0.0001582	57.151	19	splicing factor proline and glutamine rich
Pre-frontal cortex	Streptozocin	ENSRNOT00000035821	Slc1a3	497	54323.8	12	175	0	0.1831	0.0001582	40.962	0	solute carrier family 1 member 3
Pre-frontal cortex	Streptozocin	P24942-2	Slc1a3 Eaat1	497	54337.8	12	175	0	0.1831	0.0001582	40.962	0	Excitatory amino acid transporter 1 (Glial glutamate transporter) (Sodium-dependent glutamate/aspartate transporter 1, GLAST, GLAST-1) (Solute carrier family 1 member 3)
Pre-frontal cortex	Streptozocin	ENSRNOT00000078038	Rpl26	145	17229.5	8	51	6	0.4414	0.000158	13.577	1	ribosomal protein L26
Pre-frontal cortex	Streptozocin	ENSRNOT00000083427	Rpl14	219	23747.3	8	77	0	0.2694	0.000158	16.698	0	ribosomal protein L14
Pre-frontal cortex	Streptozocin	P35435	Atp5f1c Atp5c Atp5c1	273	30153.7	9	96	0	0.2747	0.000158	20.554	0	ATP synthase subunit gamma, mitochondrial (ATP synthase F1 subunit gamma) (F-ATPase gamma subunit)
Pre-frontal cortex	Streptozocin	ENSRNOT00000004911	Nono	476	54872.6	18	167	150	0.4349	0.0001576	40.612	16	non-POU domain containing, octamer-binding
Pre-frontal cortex	Streptozocin	P00173	Cyb5a	134	15327.6	4	47	0	0.4104	0.0001576	12.126	0	cytochrome b5 type A
Pre-frontal cortex	Streptozocin	ENSRNOT00000088242	Pdhx	502	54117.6	15	176	8	0.3247	0.0001575	36.019	2	pyruvate dehydrogenase complex, component X
Pre-frontal cortex	Streptozocin	ENSRNOT00000028219	Pspc1	522	58704.2	17	183	0	0.3372	0.0001575	41.574	0	paraspeckle component 1
Pre-frontal cortex	Streptozocin	Q63622-7	Dlg2 Dlgh2	870	97407.5	34	305	0	0.4241	0.0001575	81.757	0	Disks large homolog 2 (Channel-associated protein of synapse-110, Chapsyn-110) (Postsynaptic density protein PSD-93)
Pre-frontal cortex	Streptozocin	Q9QY17-4	Pacsin2	445	51244	20	156	0	0.4944	0.0001575	44.302	0	Protein kinase C and casein kinase substrate in neurons 2 protein (Synaptic dynamin-associated protein II) (Syndapin-2) (Syndapin-II, SdpII)
Pre-frontal cortex	Streptozocin	ENSRNOT00000060444	Eif3b	797	90836	37	279	271	0.5107	0.0001573	81.261	35	eukaryotic translation initiation factor 3, subunit B
Pre-frontal cortex	Streptozocin	ENSRNOT00000016162	Cab39l	337	39048.7	15	118	14	0.3116	0.0001573	28.484	2	calcium binding protein 39-like
Pre-frontal cortex	Streptozocin	ENSRNOT00000018880	Tom1	492	54037.2	19	172	158	0.5163	0.0001571	48.518	17	target of myb1 membrane trafficking protein
Pre-frontal cortex	Streptozocin	ENSRNOT00000005571	Tnpo2	913	102792	25	319	263	0.3417	0.000157	60.233	17	transportin 2
Pre-frontal cortex	Streptozocin	Q1WIM2-2	Cadm2 Igsf4d Necl3	395	43457	10	138	0	0.3949	0.000157	29.982	0	Cell adhesion molecule 2 (Immunoglobulin superfamily member 4D, IgSF4D) (Nectin-like protein 3, NECL-3) (Synaptic cell adhesion molecule 2, SynCAM 2)
Pre-frontal cortex	Streptozocin	ENSRNOT00000017412	Epb41l2	802	89057.1	30	280	0	0.3965	0.0001569	72.753	0	erythrocyte membrane protein band 4.1-like 2
Pre-frontal cortex	Streptozocin	ENSRNOT00000007332	AABR07057196.1	504	55103.7	14	176	0	0.369	0.0001569	38.079	0	Uncharacterized protein
Pre-frontal cortex	Streptozocin	ENSRNOT00000006567	Sar1b	198	22377.5	8	69	49	0.4293	0.0001566	16.448	4	secretion associated, Ras related GTPase 1B
Pre-frontal cortex	Streptozocin	ENSRNOT00000013043	Nampt	491	55385.4	20	171	171	0.4562	0.0001565	43.685	20	nicotinamide phosphoribosyltransferase
Pre-frontal cortex	Streptozocin	ENSRNOT00000090378	Hnrnpc	313	34345.9	12	109	13	0.377	0.0001565	29.676	1	heterogeneous nuclear ribonucleoprotein C
Pre-frontal cortex	Streptozocin	Q8K4F7	Dcps	336	38672.1	7	117	0	0.3333	0.0001564	20.831	0	decapping enzyme, scavenger
Pre-frontal cortex	Streptozocin	ENSRNOT00000077301	Atp5f1d	184	19277.1	6	64	0	0.4022	0.0001563	16.361	0	ATP synthase F1 subunit delta
Pre-frontal cortex	Streptozocin	P20760	Igg-2a	322	35145.4	9	112	77	0.3447	0.0001563	23.497	6	Ig gamma-2A chain C region
Pre-frontal cortex	Streptozocin	P36576	Arr3 Car	92	9854.2	4	32	0	0.2717	0.0001563	8.528	0	Arrestin-C (Cone arrestin, cArr) (Retinal cone arrestin-3)
Pre-frontal cortex	Streptozocin	ENSRNOT00000083688	Mapk9	397	45105.7	17	138	0	0.4358	0.0001562	33.487	0	mitogen-activated protein kinase 9
Pre-frontal cortex	Streptozocin	Q01066	Pde1b	535	61202.7	29	186	146	0.5346	0.0001562	63.773	25	phosphodiesterase 1B
Pre-frontal cortex	Streptozocin	ENSRNOT00000000750	Ube2d1	147	16573.3	4	51	9	0.1973	0.0001559	10.543	2	ubiquitin-conjugating enzyme E2D 1
Pre-frontal cortex	Streptozocin	Q9Z272	Git1	770	85160.2	33	267	29	0.5416	0.0001558	80.964	3	GIT ArfGAP 1
Pre-frontal cortex	Streptozocin	ENSRNOT00000076913	Pspc1	525	59094.4	16	182	0	0.3105	0.0001557	40.445	0	paraspeckle component 1
Pre-frontal cortex	Streptozocin	ENSRNOT00000078975	NA	104	12071.8	9	36	15	0.3077	0.0001555	19.282	2	NA
Pre-frontal cortex	Streptozocin	ENSRNOT00000082505	Ppp3cc	506	57746.3	16	175	0	0.1324	0.0001554	31.861	0	protein phosphatase 3 catalytic subunit gamma
Pre-frontal cortex	Streptozocin	ENSRNOT00000012792	Rapgef2	1294	144189	40	447	0	0.4312	0.0001552	102.728	0	Rap guanine nucleotide exchange factor 2
Pre-frontal cortex	Streptozocin	ENSRNOT00000013228	Tmod1	359	40410.8	13	124	0	0.4875	0.0001552	33.71	0	tropomodulin 1
Pre-frontal cortex	Streptozocin	P70567	Tmod1 Tmod	359	40436.8	13	124	0	0.4875	0.0001552	33.71	0	Tropomodulin-1 (Erythrocyte tropomodulin, E-Tmod)
Pre-frontal cortex	Streptozocin	Q5BK81-2	Ptgr2 Zadh1	281	29859.8	6	97	0	0.3594	0.0001551	17.73	0	Prostaglandin reductase 2, PRG-2, EC 1.3.1.48 (15-oxoprostaglandin 13-reductase) (Zinc-binding alcohol dehydrogenase domain-containing protein 1)
Pre-frontal cortex	Streptozocin	P20070-3	Cyb5r3 Dia1	278	31553.3	12	96	0	0.5719	0.0001551	31.43	0	NADH-cytochrome b5 reductase 3, B5R, Cytochrome b5 reductase, EC 1.6.2.2 (Diaphorase-1) [Cleaved into: NADH-cytochrome b5 reductase 3 membrane-bound form; NADH-cytochrome b5 reductase 3 soluble form ]
Pre-frontal cortex	Streptozocin	ENSRNOT00000059073	Ptgr2	351	38094.1	8	121	24	0.3305	0.0001549	22.489	2	prostaglandin reductase 2
Pre-frontal cortex	Streptozocin	Q9Z214-2	Homer1 Homer Vesl	354	40081.3	16	122	0	0.4435	0.0001548	37.758	0	Homer protein homolog 1 (PSD-Zip45) (VASP/Ena-related gene up-regulated during seizure and LTP 1, Vesl-1)
Pre-frontal cortex	Streptozocin	ENSRNOT00000064601	Atp1a4	1028	113914	23	354	8	0.1265	0.0001547	60	2	ATPase Na+/K+ transporting subunit alpha 4
Pre-frontal cortex	Streptozocin	ENSRNOT00000078969	Reep2	250	27753.6	6	86	0	0.292	0.0001546	14.184	0	receptor accessory protein 2
Pre-frontal cortex	Streptozocin	ENSRNOT00000085211	Iars2	1017	113334	32	350	0	0.4041	0.0001546	75.96	0	isoleucyl-tRNA synthetase 2, mitochondrial
Pre-frontal cortex	Streptozocin	F1LQX4-3	Arhgap44 Rich2	770	84020.7	22	265	0	0.3896	0.0001546	55.926	0	Rho GTPase-activating protein 44 (Rho-type GTPase-activating protein RICH2) (RhoGAP interacting with CIP4 homologs protein 2, RICH-2)
Pre-frontal cortex	Streptozocin	ENSRNOT00000019707	Vps28	221	25433.6	8	76	0	0.5204	0.0001545	17.834	0	VPS28 subunit of ESCRT-I
Pre-frontal cortex	Streptozocin	P83732	Rpl24	157	17749.9	6	54	12	0.2548	0.0001545	13.272	2	ribosomal protein L24
Pre-frontal cortex	Streptozocin	Q712U5-2	Arpp19	96	10580.5	6	33	0	0.3854	0.0001544	11.693	0	cAMP-regulated phosphoprotein 19, ARPP-19
Pre-frontal cortex	Streptozocin	Q9Z250-2	Lin7a Mals1 Veli1	195	21195.1	10	67	0	0.3949	0.0001544	20.673	0	Protein lin-7 homolog A, Lin-7A (Mammalian lin-seven protein 1, MALS-1) (Vertebrate lin-7 homolog 1, Veli-1)
Pre-frontal cortex	Streptozocin	Q924S5	Lonp1	950	105708	34	326	326	0.4611	0.0001542	81.158	34	lon peptidase 1, mitochondrial
Pre-frontal cortex	Streptozocin	ENSRNOT00000017805	Nceh1	408	45774.8	13	140	130	0.4314	0.0001542	32.33	12	neutral cholesterol ester hydrolase 1
Pre-frontal cortex	Streptozocin	ENSRNOT00000014002	Ipo7	1038	119394	35	356	343	0.4056	0.0001541	82.491	34	importin 7
Pre-frontal cortex	Streptozocin	Q6MG12	RGD1302996	172	20413.6	6	59	59	0.3198	0.0001541	11.884	6	hypothetical protein MGC:15854
Pre-frontal cortex	Streptozocin	ENSRNOT00000004010	Mapk9	423	48140.2	18	145	0	0.4326	0.000154	35.109	0	mitogen-activated protein kinase 9
Pre-frontal cortex	Streptozocin	Q63009	Prmt1	353	40478	15	121	113	0.5042	0.000154	34.316	12	protein arginine methyltransferase 1
Pre-frontal cortex	Streptozocin	P49186-2	Mapk9 Jnk2 Prkm9	423	48058.1	18	145	0	0.4326	0.000154	35.109	0	Mitogen-activated protein kinase 9, MAP kinase 9, MAPK 9, EC 2.7.11.24 (SAPK-alpha) (Stress-activated protein kinase JNK2) (c-Jun N-terminal kinase 2) (p54-alpha)
Pre-frontal cortex	Streptozocin	ENSRNOT00000020892	Relch	1218	134548	38	417	417	0.4212	0.0001538	97.276	38	RAB11 binding and LisH domain, coiled-coil and HEAT repeat containing
Pre-frontal cortex	Streptozocin	ENSRNOT00000002432	Snx4	450	51877.2	20	154	154	0.4444	0.0001538	44.216	20	sorting nexin 4
Pre-frontal cortex	Streptozocin	ENSRNOT00000016067	Cygb	190	21465	7	65	65	0.4316	0.0001537	14.277	7	cytoglobin
Pre-frontal cortex	Streptozocin	Q63100-4	Dync1i1 Dnci1 Dncic1	606	68270.5	18	207	0	0.4175	0.0001535	49.244	0	Cytoplasmic dynein 1 intermediate chain 1 (Cytoplasmic dynein intermediate chain 1) (Dynein intermediate chain 1, cytosolic, DH IC-1)
Pre-frontal cortex	Streptozocin	Q6AYR2	Ndrg3	375	41462.5	12	128	61	0.4613	0.0001534	32.747	5	NDRG family member 3
Pre-frontal cortex	Streptozocin	ENSRNOT00000060514	Hnrnpc	293	32284.8	12	100	0	0.3584	0.0001533	28.95	0	heterogeneous nuclear ribonucleoprotein C
Pre-frontal cortex	Streptozocin	ENSRNOT00000073564	Reep2	252	27874.8	6	86	0	0.2897	0.0001533	14.184	0	receptor accessory protein 2
Pre-frontal cortex	Streptozocin	Q5XHY5	Tars1	695	80506.5	26	237	0	0.3971	0.0001532	59.5	0	threonyl-tRNA synthetase 1
Pre-frontal cortex	Streptozocin	Q64542-3	Atp2b4	1157	127366	42	394	0	0.3708	0.000153	109.468	0	Plasma membrane calcium-transporting ATPase 4, PMCA4, EC 7.2.2.10 (Plasma membrane calcium ATPase isoform 4) (Plasma membrane calcium pump isoform 4)
Pre-frontal cortex	Streptozocin	ENSRNOT00000072048	Ak5	562	63097.9	14	191	182	0.3452	0.0001527	39.047	13	adenylate kinase 5
Pre-frontal cortex	Streptozocin	ENSRNOT00000082027	Gstz1	215	23829.5	11	73	0	0.6372	0.0001525	25.832	0	glutathione S-transferase zeta 1
Pre-frontal cortex	Streptozocin	ENSRNOT00000063787	Rpl14	227	26341	8	77	0	0.2599	0.0001524	16.698	0	ribosomal protein L14
Pre-frontal cortex	Streptozocin	B5DF89	Cul3	768	88857.4	34	260	37	0.4844	0.0001521	74.477	5	cullin 3
Pre-frontal cortex	Streptozocin	Q63666-4	Vamp1 Syb1	130	13912.9	3	44	0	0.2538	0.0001521	8.473	0	Vesicle-associated membrane protein 1, VAMP-1 (Synaptobrevin-1)
Pre-frontal cortex	Streptozocin	Q63100-3	Dync1i1 Dnci1 Dncic1	627	70639.6	19	212	0	0.437	0.0001519	53.281	0	Cytoplasmic dynein 1 intermediate chain 1 (Cytoplasmic dynein intermediate chain 1) (Dynein intermediate chain 1, cytosolic, DH IC-1)
Pre-frontal cortex	Streptozocin	P18445	Rpl27a	148	16590	6	50	50	0.2838	0.0001518	12.357	6	ribosomal protein L27a
Pre-frontal cortex	Streptozocin	ENSRNOT00000081916	Vps26a	299	34540	9	101	0	0.3679	0.0001518	20.595	0	VPS26 retromer complex component A
Pre-frontal cortex	Streptozocin	ENSRNOT00000072215	Gstz1	216	23927.5	11	73	0	0.6343	0.0001518	25.832	0	glutathione S-transferase zeta 1
Pre-frontal cortex	Streptozocin	ENSRNOT00000087003	Trappc1	145	16852.6	6	49	49	0.3793	0.0001518	11.375	6	trafficking protein particle complex subunit 1
Pre-frontal cortex	Streptozocin	P11506-5	Atp2b2	1154	127258	40	390	0	0.3614	0.0001518	100.172	0	Plasma membrane calcium-transporting ATPase 2, PMCA2, EC 7.2.2.10 (Plasma membrane calcium ATPase isoform 2) (Plasma membrane calcium pump isoform 2)
Pre-frontal cortex	Streptozocin	ENSRNOT00000078730	Git1	706	78202.8	30	238	0	0.5269	0.0001515	70.726	0	GIT ArfGAP 1
Pre-frontal cortex	Streptozocin	Q64542-2	Atp2b4	1169	128691	42	394	0	0.367	0.0001514	109.468	0	Plasma membrane calcium-transporting ATPase 4, PMCA4, EC 7.2.2.10 (Plasma membrane calcium ATPase isoform 4) (Plasma membrane calcium pump isoform 4)
Pre-frontal cortex	Streptozocin	ENSRNOT00000048455	Rabggta	567	64844.9	25	191	191	0.5132	0.0001513	54.73	25	Rab geranylgeranyltransferase subunit alpha
Pre-frontal cortex	Streptozocin	ENSRNOT00000084380	NA	107	12194.2	2	36	0	0.2336	0.0001512	5.622	0	NA
Pre-frontal cortex	Streptozocin	ENSRNOT00000022275	Gstk1	226	25458.3	9	76	76	0.5	0.0001511	20.906	9	glutathione S-transferase kappa 1
Pre-frontal cortex	Streptozocin	ENSRNOT00000082159	LOC100359876 rCG_63323	333	37093.8	14	112	0	0.4264	0.0001511	33.076	0	Multifunctional protein ADE2-like (RCG63323)
Pre-frontal cortex	Streptozocin	O70277	Trim3	744	80726.9	20	250	0	0.3508	0.000151	48.568	0	tripartite motif-containing 3
Pre-frontal cortex	Streptozocin	P11506-12	Atp2b2	1160	128001	40	390	0	0.3595	0.000151	100.172	0	Plasma membrane calcium-transporting ATPase 2, PMCA2, EC 7.2.2.10 (Plasma membrane calcium ATPase isoform 2) (Plasma membrane calcium pump isoform 2)
Pre-frontal cortex	Streptozocin	Q9ESW0	Ddb1	1140	126763	43	383	0	0.3211	0.0001509	96.986	0	DNA damage-binding protein 1 (Damage-specific DNA-binding protein 1)
Pre-frontal cortex	Streptozocin	P47971	Nptx1	432	47168.9	13	145	145	0.3495	0.0001508	32.357	13	neuronal pentraxin 1
Pre-frontal cortex	Streptozocin	ENSRNOT00000004862	Jpt1	149	15547.6	5	50	35	0.6644	0.0001508	16.017	3	Jupiter microtubule associated homolog 1
Pre-frontal cortex	Streptozocin	ENSRNOT00000088016	Xpnpep1	623	69595.1	30	209	208	0.626	0.0001507	65.682	29	X-prolyl aminopeptidase 1
Pre-frontal cortex	Streptozocin	B0BNA7	Eif3i	325	36419.6	13	109	6	0.4708	0.0001507	28.845	1	eukaryotic translation initiation factor 3, subunit I
Pre-frontal cortex	Streptozocin	ENSRNOT00000005781	Glrx5	152	16403.5	5	51	51	0.3947	0.0001507	13.89	5	glutaredoxin 5
Pre-frontal cortex	Streptozocin	P12001	Rpl18	188	21627.2	5	63	0	0.266	0.0001506	12.974	0	ribosomal protein L18
Pre-frontal cortex	Streptozocin	ENSRNOT00000082180	Grpel1	230	25777.6	6	77	0	0.2522	0.0001504	13.428	0	GrpE-like 1, mitochondrial
Pre-frontal cortex	Streptozocin	ENSRNOT00000008737	Fkbp4	458	51399.8	24	153	153	0.4629	0.0001501	51.485	24	FKBP prolyl isomerase 4
Pre-frontal cortex	Streptozocin	ENSRNOT00000015971	Hnrnpr	632	70812.2	22	211	117	0.3339	0.00015	50.119	16	heterogeneous nuclear ribonucleoprotein R
Pre-frontal cortex	Streptozocin	P11506-3	Atp2b2	1168	128664	40	390	0	0.357	0.00015	100.172	0	Plasma membrane calcium-transporting ATPase 2, PMCA2, EC 7.2.2.10 (Plasma membrane calcium ATPase isoform 2) (Plasma membrane calcium pump isoform 2)
Pre-frontal cortex	Streptozocin	ENSRNOT00000091980	Clasp2	1505	164575	51	502	6	0.4007	0.0001499	117.68	2	cytoplasmic linker associated protein 2
Pre-frontal cortex	Streptozocin	ENSRNOT00000089108	Dlg4	729	80813	27	243	0	0.4376	0.0001498	67.791	0	discs large MAGUK scaffold protein 4
Pre-frontal cortex	Streptozocin	ENSRNOT00000075983	Nebl	351	40067.3	15	117	99	0.433	0.0001498	30.783	11	nebulette
Pre-frontal cortex	Streptozocin	ENSRNOT00000003762	Mri1	369	39544.5	11	123	123	0.4797	0.0001498	27.565	11	methylthioribose-1-phosphate isomerase 1
Pre-frontal cortex	Streptozocin	ENSRNOT00000059541	Cox17	63	6761.3	2	21	21	0.4603	0.0001498	5.803	2	cytochrome c oxidase copper chaperone COX17
Pre-frontal cortex	Streptozocin	ENSRNOT00000042314	Cdc37	363	42623	13	121	0	0.3223	0.0001498	29.795	0	cell division cycle 37, HSP90 cochaperone
Pre-frontal cortex	Streptozocin	ENSRNOT00000028555	Rpl18	189	21755.2	5	63	0	0.2646	0.0001498	12.974	0	ribosomal protein L18
Pre-frontal cortex	Streptozocin	ENSRNOT00000084505	Cab39l	306	35162.5	12	102	0	0.2778	0.0001498	23.788	0	calcium binding protein 39-like
Pre-frontal cortex	Streptozocin	B5DEN9	Vps28	228	26075	8	76	0	0.5044	0.0001498	17.834	0	Vacuolar protein sorting-associated protein 28 homolog
Pre-frontal cortex	Streptozocin	ENSRNOT00000035486	Mars1	902	101499	36	300	300	0.5144	0.0001494	86.982	36	methionyl-tRNA synthetase 1
Pre-frontal cortex	Streptozocin	ENSRNOT00000008238	Ppm1a	472	53412.8	16	157	1	0.4131	0.0001494	38.608	1	protein phosphatase, Mg2+/Mn2+ dependent, 1A
Pre-frontal cortex	Streptozocin	ENSRNOT00000011174	Ssb	415	47738.9	14	138	4	0.3446	0.0001494	35.012	1	small RNA binding exonuclease protection factor La
Pre-frontal cortex	Streptozocin	ENSRNOT00000074223	Hspa1l	641	70487.2	27	213	15	0.3089	0.0001493	61.024	5	heat shock protein family A (Hsp70) member 1 like
Pre-frontal cortex	Streptozocin	ENSRNOT00000012093	Cryl1	319	35300	12	106	106	0.4451	0.0001493	31.294	12	crystallin, lambda 1
Pre-frontal cortex	Streptozocin	ENSRNOT00000079949	Cdc37	364	42951.2	13	121	0	0.3214	0.0001493	29.795	0	cell division cycle 37, HSP90 cochaperone
Pre-frontal cortex	Streptozocin	ENSRNOT00000056615	NA	298	32628.6	8	99	0	0.3322	0.0001493	25.445	0	NA
Pre-frontal cortex	Streptozocin	ENSRNOT00000061482	AABR07055527.1	247	27626.8	7	82	0	0.1984	0.0001492	16.702	0	Nucleophosmin
Pre-frontal cortex	Streptozocin	P11506-10	Atp2b2	1174	129408	40	390	0	0.3552	0.0001492	100.172	0	Plasma membrane calcium-transporting ATPase 2, PMCA2, EC 7.2.2.10 (Plasma membrane calcium ATPase isoform 2) (Plasma membrane calcium pump isoform 2)
Pre-frontal cortex	Streptozocin	ENSRNOT00000001415	Elavl1	326	36128.1	15	108	108	0.4356	0.0001488	32.381	15	ELAV like RNA binding protein 1
Pre-frontal cortex	Streptozocin	ENSRNOT00000088202	Tars1	722	83317.9	27	239	2	0.4003	0.0001487	61.134	1	threonyl-tRNA synthetase 1
Pre-frontal cortex	Streptozocin	ENSRNOT00000025009	Camkk1	505	55844.6	19	167	1	0.4752	0.0001486	48.765	1	calcium/calmodulin-dependent protein kinase kinase 1
Pre-frontal cortex	Streptozocin	Q62936-2	Dlg3 Dlgh3	835	92096.6	30	276	0	0.4515	0.0001485	76.055	0	Disks large homolog 3 (PSD-95/SAP90-related protein 1) (Synapse-associated protein 102, SAP-102, SAP102)
Pre-frontal cortex	Streptozocin	ENSRNOT00000028677	Prune1	454	49948.5	13	150	150	0.3811	0.0001484	31.888	13	prune exopolyphosphatase 1
Pre-frontal cortex	Streptozocin	ENSRNOT00000071971	LOC684270	209	22896.3	4	69	69	0.4019	0.0001483	12.971	4	similar to isochorismatase domain containing 2
Pre-frontal cortex	Streptozocin	ENSRNOT00000086550	Plec	4513	513655	178	1488	0	0.4514	0.0001481	410.107	0	plectin
Pre-frontal cortex	Streptozocin	ENSRNOT00000078891	Syncrip	458	51245.7	13	151	0	0.2969	0.0001481	33.013	0	synaptotagmin binding, cytoplasmic RNA interacting protein
Pre-frontal cortex	Streptozocin	Q63100	Dync1i1	643	72690.6	19	212	0	0.4261	0.0001481	53.281	0	dynein cytoplasmic 1 intermediate chain 1
Pre-frontal cortex	Streptozocin	ENSRNOT00000077445	Ddx6	483	54192.2	15	159	148	0.4369	0.0001479	33.939	14	DEAD-box helicase 6
Pre-frontal cortex	Streptozocin	ENSRNOT00000005641	Pdk2	407	46192.3	16	134	0	0.5135	0.0001479	37.524	0	pyruvate dehydrogenase kinase 2
Pre-frontal cortex	Streptozocin	P11506-4	Atp2b2	1185	130044	40	390	0	0.3519	0.0001479	100.172	0	Plasma membrane calcium-transporting ATPase 2, PMCA2, EC 7.2.2.10 (Plasma membrane calcium ATPase isoform 2) (Plasma membrane calcium pump isoform 2)
Pre-frontal cortex	Streptozocin	ENSRNOT00000091840	Plec	4523	514780	178	1488	0	0.4504	0.0001478	410.107	0	plectin
Pre-frontal cortex	Streptozocin	P97756	Camkk1	505	55854.6	18	166	0	0.4198	0.0001477	45.609	0	calcium/calmodulin-dependent protein kinase kinase 1
Pre-frontal cortex	Streptozocin	P49185	Mapk8	411	46758.7	17	135	22	0.4331	0.0001476	33.39	4	mitogen-activated protein kinase 8
Pre-frontal cortex	Streptozocin	ENSRNOT00000091285	Plec	4536	516360	178	1488	0	0.4491	0.0001474	410.107	0	plectin
Pre-frontal cortex	Streptozocin	O70441	Syn3	579	63290.9	19	190	165	0.4542	0.0001474	47.638	16	synapsin III
Pre-frontal cortex	Streptozocin	O35764	Nptxr Npr	494	52319.9	22	162	8	0.4494	0.0001473	53.383	1	Neuronal pentraxin receptor
Pre-frontal cortex	Streptozocin	F1LQX4-2	Arhgap44 Rich2	808	88314.8	22	265	0	0.3713	0.0001473	55.926	0	Rho GTPase-activating protein 44 (Rho-type GTPase-activating protein RICH2) (RhoGAP interacting with CIP4 homologs protein 2, RICH-2)
Pre-frontal cortex	Streptozocin	ENSRNOT00000040762	Plec	4544	517078	179	1489	0	0.4536	0.0001472	411.352	0	plectin
Pre-frontal cortex	Streptozocin	P0DMW0	Hspa1a	641	70124.1	28	210	0	0.3229	0.0001472	62.108	0	heat shock protein family A (Hsp70) member 1A
Pre-frontal cortex	Streptozocin	P0DMW1	Hspa1a	641	70124.1	28	210	0	0.3229	0.0001472	62.108	0	heat shock protein family A (Hsp70) member 1A
Pre-frontal cortex	Streptozocin	ENSRNOT00000006311	Plec	4545	517198	178	1488	0	0.4482	0.0001471	410.107	0	plectin
Pre-frontal cortex	Streptozocin	P31662	Slc6a17	727	80984.3	23	238	238	0.3109	0.0001471	59.573	23	solute carrier family 6 member 17
Pre-frontal cortex	Streptozocin	P11506-11	Atp2b2	1191	130788	40	390	0	0.3501	0.0001471	100.172	0	Plasma membrane calcium-transporting ATPase 2, PMCA2, EC 7.2.2.10 (Plasma membrane calcium ATPase isoform 2) (Plasma membrane calcium pump isoform 2)
Pre-frontal cortex	Streptozocin	ENSRNOT00000068134	Anxa3	324	36322.6	13	106	78	0.5185	0.000147	32.943	11	annexin A3
Pre-frontal cortex	Streptozocin	ENSRNOT00000067635	Pvalb	110	11900	3	36	36	0.3273	0.000147	6.587	3	parvalbumin
Pre-frontal cortex	Streptozocin	ENSRNOT00000081021	Plec	4552	518032	178	1488	0	0.4475	0.0001469	410.107	0	plectin
Pre-frontal cortex	Streptozocin	F1LU71	Auh	315	33302	11	103	103	0.419	0.0001469	26.823	11	AU RNA binding methylglutaconyl-CoA hydratase
Pre-frontal cortex	Streptozocin	ENSRNOT00000002552	Crkl	303	33825.9	13	99	89	0.3993	0.0001468	26.64	11	CRK like proto-oncogene, adaptor protein
Pre-frontal cortex	Streptozocin	ENSRNOT00000029444	Hddc2	199	22955.2	5	65	65	0.3719	0.0001467	13.147	5	HD domain containing 2
Pre-frontal cortex	Streptozocin	Q8VIJ5	Oga	916	102834	35	299	0	0.4465	0.0001467	79.128	0	O-GlcNAcase
Pre-frontal cortex	Streptozocin	P49186	Mapk9	423	47968.1	17	138	0	0.409	0.0001466	33.487	0	mitogen-activated protein kinase 9
Pre-frontal cortex	Streptozocin	ENSRNOT00000092562	Arpc5	92	9671.8	5	30	0	0.3804	0.0001465	9.917	0	actin related protein 2/3 complex, subunit 5
Pre-frontal cortex	Streptozocin	ENSRNOT00000060871	Nfasc	1240	137900	44	404	37	0.4129	0.0001464	115.252	4	neurofascin
Pre-frontal cortex	Streptozocin	Q63468	Prpsap1	356	39392.6	15	116	0	0.4551	0.0001464	37.154	0	Phosphoribosyl pyrophosphate synthase-associated protein 1, PRPP synthase-associated protein 1 (39 kDa phosphoribosypyrophosphate synthase-associated protein, PAP39)
Pre-frontal cortex	Streptozocin	ENSRNOT00000064613	Tln2	2453	262304	80	799	0	0.51	0.0001463	222.831	0	talin 2
Pre-frontal cortex	Streptozocin	ENSRNOT00000004829	Arhgap44	814	89040.3	22	265	0	0.3686	0.0001463	55.926	0	Rho GTPase activating protein 44
Pre-frontal cortex	Streptozocin	ENSRNOT00000075018	NA	43	4932.6	2	14	0	0.186	0.0001463	3.423	0	NA
Pre-frontal cortex	Streptozocin	ENSRNOT00000042642	Plec	4574	519674	178	1488	0	0.4453	0.0001462	410.107	0	plectin
Pre-frontal cortex	Streptozocin	ENSRNOT00000043476	Atp2b2	1199	131424	40	390	0	0.3478	0.0001461	100.172	0	ATPase plasma membrane Ca2+ transporting 2
Pre-frontal cortex	Streptozocin	ENSRNOT00000003741	Dlg3	849	93463.2	30	276	0	0.4441	0.0001461	76.055	0	discs large MAGUK scaffold protein 3
Pre-frontal cortex	Streptozocin	P11506-2	Atp2b2	1199	131451	40	390	0	0.3478	0.0001461	100.172	0	Plasma membrane calcium-transporting ATPase 2, PMCA2, EC 7.2.2.10 (Plasma membrane calcium ATPase isoform 2) (Plasma membrane calcium pump isoform 2)
[truncated: 24,585 more rows]
