# Supplementary material for: Proteomic Analysis of a Rat Streptozotocin Model Shows Dysregulated Biological Pathways Implicated in Alzheimer’s Disease
Source: Int J Mol Sci. 2024 Feb 28;25(5):2772. doi: 10.3390/ijms25052772 (PMC10931650; doi:10.3390/ijms25052772)
Supplement: Supplementary file 1 [file ijms-25-02772-s001.zip › Table S2.xlsx]

## Sheet: Total
Supplementary Table S2. Peptides identified in the prefrontal cortex and hippocampus proteomes of the streptozotocin rat model and control (wild-type)
Dataset	Class	SeproQ	PeptideSequence	NoMyScans	NoMyMapableProteins	TheProteinLocci
Pre-frontal cortex	Streptozocin	0	MIFMELNDAWSEFENQGQKPLY	17	2	ENSRNOT00000086539,ENSRNOT00000086259
Pre-frontal cortex	Streptozocin	0	ATGQPYEQYAK	11	2	ENSRNOT00000086539,ENSRNOT00000086259
Pre-frontal cortex	Streptozocin	0	QAPSLHNLFAVCR	18	2	ENSRNOT00000086539,ENSRNOT00000086259
Pre-frontal cortex	Streptozocin	0	RPGIGLSPSHR	13	2	ENSRNOT00000086539,ENSRNOT00000086259
Pre-frontal cortex	Streptozocin	0	IFIPLNITVQGDVIVSMYHLR	4	2	ENSRNOT00000086539,ENSRNOT00000086259
Pre-frontal cortex	Streptozocin	0	IAVHVVPDQLMTFSGTSDPCALCSLHSIGK	2	1	P30904
Pre-frontal cortex	Streptozocin	0	AFLADPSAFAAAAPVAAATTAAPAAAAAPAK	33	2	ENSRNOT00000001518,ENSRNOT00000040909
Pre-frontal cortex	Streptozocin	0	VGASEATLLNM[15.9949]LNISPF	3	1	ENSRNOT00000001518
Pre-frontal cortex	Streptozocin	0	NCLILAVSPANSDLANSDALK	8	8	ENSRNOT00000047921,P21575-2,P21575-3,P21575-4,P21575-5,P21575-6,P21575-7,P21575-8
Pre-frontal cortex	Streptozocin	0	EFIFSELLANLYSCGDQNTLMEESAEQAQR	51	8	ENSRNOT00000047921,P21575-2,P21575-3,P21575-4,P21575-5,P21575-6,P21575-7,P21575-8
Pre-frontal cortex	Streptozocin	0	LQSQLLSIEK	22	14	ENSRNOT00000047921,ENSRNOT00000066007,ENSRNOT00000010947,ENSRNOT00000065028,P21575-2,P21575-3,P21575-4,P21575-5,P21575-6,P21575-7,P21575-8,P39052-2,P39052-3,P39052-4
Pre-frontal cortex	Streptozocin	0	GPAPGPPPAGSALGGAPPVPSR	21	6	ENSRNOT00000047921,P21575-2,P21575-4,P21575-5,P21575-6,P21575-8
Pre-frontal cortex	Streptozocin	0	PGASPDPFGPPPQVPSRPNR	24	6	ENSRNOT00000047921,P21575-2,P21575-4,P21575-5,P21575-6,P21575-8
Pre-frontal cortex	Streptozocin	0	LREEMER	5	10	ENSRNOT00000047921,ENSRNOT00000045085,ENSRNOT00000049544,P21575-2,P21575-3,P21575-4,P21575-5,P21575-6,P21575-7,P21575-8
Pre-frontal cortex	Streptozocin	0	VLTAENLSWYK	10	8	ENSRNOT00000047921,P21575-2,P21575-3,P21575-4,P21575-5,P21575-6,P21575-7,P21575-8
Pre-frontal cortex	Streptozocin	0	TIM[15.9949]HLMINNTK	1	14	ENSRNOT00000047921,ENSRNOT00000066007,ENSRNOT00000010947,ENSRNOT00000065028,P21575-2,P21575-3,P21575-4,P21575-5,P21575-6,P21575-7,P21575-8,P39052-2,P39052-3,P39052-4
Pre-frontal cortex	Streptozocin	0	PAPGPPPAGSALGGAPPVPSR	1	6	ENSRNOT00000047921,P21575-2,P21575-4,P21575-5,P21575-6,P21575-8
Pre-frontal cortex	Streptozocin	0	TFLSSPMEVGK	11	3	ENSRNOT00000091135,ENSRNOT00000012792,F1M386
Pre-frontal cortex	Streptozocin	0	LLNIACAAK	4	4	ENSRNOT00000091135,ENSRNOT00000012792,ENSRNOT00000013481,F1M386
Pre-frontal cortex	Streptozocin	0	EDSQRPGAHLTVK	1	4	ENSRNOT00000050715,ENSRNOT00000089746,ENSRNOT00000091596,P04256
Pre-frontal cortex	Streptozocin	0	SQRPGAHLTVK	1	4	ENSRNOT00000050715,ENSRNOT00000089746,ENSRNOT00000091596,P04256
Pre-frontal cortex	Streptozocin	0	GVNLPGAAVDLPAVSEK	12	4	ENSRNOT00000070925,ENSRNOT00000015332,ENSRNOT00000039144,P11980-2
Pre-frontal cortex	Streptozocin	0	MADTFLEHMCR	12	4	ENSRNOT00000070925,ENSRNOT00000015332,ENSRNOT00000039144,P11980-2
Pre-frontal cortex	Streptozocin	0	ATQMLESMIK	11	4	ENSRNOT00000051547,ENSRNOT00000070925,ENSRNOT00000015332,P11980-2
Pre-frontal cortex	Streptozocin	0	AEGSDVANAVLDGADCIMLSGETAKG	6	3	ENSRNOT00000070925,ENSRNOT00000015332,P11980-2
Pre-frontal cortex	Streptozocin	0	WAEDVDLR	6	4	ENSRNOT00000070925,ENSRNOT00000015332,ENSRNOT00000039144,P11980-2
Pre-frontal cortex	Streptozocin	0	ATESFASDPILYRPVAVALDTK	4	3	ENSRNOT00000015332,ENSRNOT00000039144,P11980-2
Pre-frontal cortex	Streptozocin	0	AATESFASDPILYRPVAVALDTKG	1	3	ENSRNOT00000015332,ENSRNOT00000039144,P11980-2
Pre-frontal cortex	Streptozocin	0	PVICANQM[15.9949]LESMIK	1	1	ENSRNOT00000039144
Pre-frontal cortex	Streptozocin	0	SVFYYEILNSPEK	20	3	ENSRNOT00000080676,ENSRNOT00000016981,P35213-2
Pre-frontal cortex	Streptozocin	0	STLIMQLLR	18	8	ENSRNOT00000007100,ENSRNOT00000080676,ENSRNOT00000077786,ENSRNOT00000086769,ENSRNOT00000085735,ENSRNOT00000016981,ENSRNOT00000084730,P35213-2
Pre-frontal cortex	Streptozocin	0	KQQM[15.9949]GKEYR	1	2	ENSRNOT00000016981,P35213-2
Pre-frontal cortex	Streptozocin	0	AAFDDAIAELDTL	2	1	ENSRNOT00000007100
Pre-frontal cortex	Streptozocin	0	VESM[15.9949]KKVAGMDVELTVEER	3	1	ENSRNOT00000007100
Pre-frontal cortex	Streptozocin	0	QDIFQEQLAAIPEFVNLGPLFK	12	2	ENSRNOT00000033706,D4ABY2
Pre-frontal cortex	Streptozocin	0	AEDEGIICVEGMAGGAVHIDYNCVPSVIYTHPEVAWVGK	1	1	Q6P6R2
Pre-frontal cortex	Streptozocin	0	IPNIFAIGDVVAGPM[15.9949]LAHK	9	1	Q6P6R2
Pre-frontal cortex	Streptozocin	0	LTGGIAHLFK	11	1	Q6P6R2
Pre-frontal cortex	Streptozocin	0	AFHNELLTQLEQK	22	2	ENSRNOT00000005687,Q6GMN2-2
Pre-frontal cortex	Streptozocin	0	LFNLSNFLDK	6	12	ENSRNOT00000091470,ENSRNOT00000093052,ENSRNOT00000092945,ENSRNOT00000084268,ENSRNOT00000025415,ENSRNOT00000092086,ENSRNOT00000032792,ENSRNOT00000084437,O55012,O55012-2,Q05140,Q05140-2
Pre-frontal cortex	Streptozocin	0	HLMVHGNER	1	4	ENSRNOT00000032792,ENSRNOT00000084437,Q05140,Q05140-2
Pre-frontal cortex	Streptozocin	0	QMAFDFAR	12	4	ENSRNOT00000032792,ENSRNOT00000084437,Q05140,Q05140-2
Pre-frontal cortex	Streptozocin	0	ALVTTHHLMVHGNER	29	4	ENSRNOT00000032792,ENSRNOT00000084437,Q05140,Q05140-2
Pre-frontal cortex	Streptozocin	0	SGLQGYDMSTFIR	1	8	ENSRNOT00000091470,ENSRNOT00000093052,ENSRNOT00000092945,ENSRNOT00000084268,ENSRNOT00000025415,ENSRNOT00000092086,O55012,O55012-2
Pre-frontal cortex	Streptozocin	0	VAMQDATAQMAMLQFISSGLPK	64	1	Q9ER34
Pre-frontal cortex	Streptozocin	0	VAMSHFEPSEYIR	38	1	Q9ER34
Pre-frontal cortex	Streptozocin	0	LTGTLSGWTSPK	14	1	Q9ER34
Pre-frontal cortex	Streptozocin	0	LEAPDADELPR	12	1	Q9ER34
Pre-frontal cortex	Streptozocin	0	VAGILTVK	12	1	Q9ER34
Pre-frontal cortex	Streptozocin	0	DINQEVYNFLATAGAKYGVG	1	1	Q9ER34
Pre-frontal cortex	Streptozocin	0	FAPGKPLNCIIK	2	1	Q9ER34
Pre-frontal cortex	Streptozocin	0	CQILNLGAGMDTTFWK	4	2	ENSRNOT00000019640,Q6P4Z6
Pre-frontal cortex	Streptozocin	0	FAVSIGYWHDPYIEHLVR	3	1	ENSRNOT00000019640
Pre-frontal cortex	Streptozocin	0	DEGLLPNKYFEVDFPM[15.9949]IVTR	1	2	ENSRNOT00000019640,Q6P4Z6
Pre-frontal cortex	Streptozocin	0	CVVVGDGAVGK	4	9	ENSRNOT00000092558,ENSRNOT00000009994,ENSRNOT00000027641,ENSRNOT00000029025,ENSRNOT00000018118,ENSRNOT00000031979,Q6RUV5,Q8CFN2-2,Q9JJL4
Pre-frontal cortex	Streptozocin	0	VMIGGEPYTLGLFDTAGQEDYDR	4	3	ENSRNOT00000029025,ENSRNOT00000018118,Q8CFN2-2
Pre-frontal cortex	Streptozocin	0	MIYASSK	4	4	ENSRNOT00000015962,ENSRNOT00000007794,ENSRNOT00000034790,ENSRNOT00000072589
Pre-frontal cortex	Streptozocin	0	HIFSDDSSELTIR	26	4	ENSRNOT00000072184,ENSRNOT00000082257,ENSRNOT00000047666,P13596
Pre-frontal cortex	Streptozocin	0	QETLDGHMVVR	7	3	ENSRNOT00000072184,ENSRNOT00000082257,P13596
Pre-frontal cortex	Streptozocin	0	AGEQDASIHLK	14	4	ENSRNOT00000072184,ENSRNOT00000082257,ENSRNOT00000047666,P13596
Pre-frontal cortex	Streptozocin	0	SKAPSVSTTNPSQGEDLK	7	1	ENSRNOT00000082257
Pre-frontal cortex	Streptozocin	0	PSVSTTNPSQGEDLK	1	1	ENSRNOT00000082257
Pre-frontal cortex	Streptozocin	0	IVFDSANVDQAVAGAMASK	15	3	ENSRNOT00000031384,P51650,P51650-2
Pre-frontal cortex	Streptozocin	0	VYGDIIYTSAK	18	3	ENSRNOT00000031384,P51650,P51650-2
Pre-frontal cortex	Streptozocin	0	AAYDAFSSWK	13	3	ENSRNOT00000031384,P51650,P51650-2
Pre-frontal cortex	Streptozocin	0	LSHANSAVVLSAVK	26	6	ENSRNOT00000085799,ENSRNOT00000089866,ENSRNOT00000057407,P62944-2,P52303,P52303-2
Pre-frontal cortex	Streptozocin	0	DLIADSNPMVVANAVAALSEISESHPNSNLLDLNPQNINK	67	2	ENSRNOT00000085799,P62944-2
Pre-frontal cortex	Streptozocin	0	KVIAAMTVGK	16	2	ENSRNOT00000085799,P62944-2
Pre-frontal cortex	Streptozocin	0	ALQHMTDF	1	3	ENSRNOT00000085799,ENSRNOT00000023779,P62944-2
Pre-frontal cortex	Streptozocin	0	DAYSGGAVNLYHVR	12	2	ENSRNOT00000018005,P28075
Pre-frontal cortex	Streptozocin	0	GMGLSMGTMICGWDK	3	2	ENSRNOT00000018005,P28075
Pre-frontal cortex	Streptozocin	0	RNEFLGELQK	25	6	ENSRNOT00000092546,ENSRNOT00000092301,ENSRNOT00000091577,B3GNI6,B3GNI6-2,B3GNI6-3
Pre-frontal cortex	Streptozocin	0	QYPWGTVQVENEAHCDFVK	18	2	ENSRNOT00000092546,ENSRNOT00000092301
Pre-frontal cortex	Streptozocin	0	NEFLGELQK	10	6	ENSRNOT00000092546,ENSRNOT00000092301,ENSRNOT00000091577,B3GNI6,B3GNI6-2,B3GNI6-3
Pre-frontal cortex	Streptozocin	0	PVMAENYDISSCTNPQSDVFPK	1	3	ENSRNOT00000012725,ENSRNOT00000045628,P12346-2
Pre-frontal cortex	Streptozocin	0	EGVCPEGSIDSAPVK	5	3	ENSRNOT00000012725,ENSRNOT00000045628,P12346-2
Pre-frontal cortex	Streptozocin	0	DQYELLCLDNTR	1	2	ENSRNOT00000012725,ENSRNOT00000045628
Pre-frontal cortex	Streptozocin	0	DGGGDVAFVK	7	2	ENSRNOT00000012725,ENSRNOT00000045628
Pre-frontal cortex	Streptozocin	0	TSYQDCIK	1	2	ENSRNOT00000012725,ENSRNOT00000045628
Pre-frontal cortex	Streptozocin	0	QIWTLEQPPDEAGSAAVCLR	35	2	ENSRNOT00000086847,P85845
Pre-frontal cortex	Streptozocin	0	LVARPEPATGF	1	2	ENSRNOT00000086847,P85845
Pre-frontal cortex	Streptozocin	0	IGKPHTVPCK	6	6	ENSRNOT00000002656,ENSRNOT00000006859,ENSRNOT00000043480,ENSRNOT00000004583,ENSRNOT00000047772,P27952
Pre-frontal cortex	Streptozocin	0	ISSIQATTAAGSGHPTSC	8	2	ENSRNOT00000021862,P50137
Pre-frontal cortex	Streptozocin	0	QAFTDVATGSLGQGLGAACGMAYTGK	31	2	ENSRNOT00000021862,P50137
Pre-frontal cortex	Streptozocin	0	AYGLALAK	12	2	ENSRNOT00000021862,P50137
Pre-frontal cortex	Streptozocin	0	DAFQNAYLELGGLGER	16	1	ENSRNOT00000040430
Pre-frontal cortex	Streptozocin	0	EQPLDEELKDAFQNAYLELGGLGER	31	1	ENSRNOT00000040430
Pre-frontal cortex	Streptozocin	0	EQPLDEELK	9	1	ENSRNOT00000040430
Pre-frontal cortex	Streptozocin	0	GPNALTPPPTTPEWVK	4	3	ENSRNOT00000027497,ENSRNOT00000040430,ENSRNOT00000058143
Pre-frontal cortex	Streptozocin	0	TQNPMVTGTSVLGVK	16	2	ENSRNOT00000028484,P34067
Pre-frontal cortex	Streptozocin	0	FQVATVTEK	13	2	ENSRNOT00000028484,P34067
Pre-frontal cortex	Streptozocin	0	AIFASGSPFDPVTLPDGR	11	1	P13697
Pre-frontal cortex	Streptozocin	0	YLLLMDLQDR	13	1	P13697
Pre-frontal cortex	Streptozocin	0	SNAQQIVAEMLSYLETADYSIR	51	3	ENSRNOT00000085125,ENSRNOT00000064254,P18484
Pre-frontal cortex	Streptozocin	0	TVFEALQAPACHENLVK	39	3	ENSRNOT00000085125,ENSRNOT00000064254,P18484
Pre-frontal cortex	Streptozocin	0	QLSNPQQEVQNIFK	14	3	ENSRNOT00000085125,ENSRNOT00000064254,P18484
Pre-frontal cortex	Streptozocin	0	AGDYVSEEVWYR	10	4	ENSRNOT00000020304,ENSRNOT00000085125,ENSRNOT00000064254,P18484
Pre-frontal cortex	Streptozocin	0	KGPSTVTDLEETKR	14	3	ENSRNOT00000085125,ENSRNOT00000064254,P18484
Pre-frontal cortex	Streptozocin	0	TSVSLAVSR	17	3	ENSRNOT00000085125,ENSRNOT00000064254,P18484
Pre-frontal cortex	Streptozocin	0	ILVAGDTM[15.9949]DSVK	1	3	ENSRNOT00000085125,ENSRNOT00000064254,P18484
Pre-frontal cortex	Streptozocin	0	FVPAPWLSVK	2	4	ENSRNOT00000020304,ENSRNOT00000085125,ENSRNOT00000064254,P18484
Pre-frontal cortex	Streptozocin	0	AMGNLQIDFADPQR	8	2	ENSRNOT00000078720,ENSRNOT00000022550
Pre-frontal cortex	Streptozocin	0	IEAACFATIK	13	2	ENSRNOT00000015102,Q99NA5
Pre-frontal cortex	Streptozocin	0	IAEFAFEYAR	7	2	ENSRNOT00000015102,Q99NA5
Pre-frontal cortex	Streptozocin	0	ALIDM[15.9949]YAEGVADLDEIVLHYPYIPPGEK	5	1	ENSRNOT00000018325
Pre-frontal cortex	Streptozocin	0	SANLVAATLGAILNR	26	1	P05708
Pre-frontal cortex	Streptozocin	0	LGVEPSDVDCVSVQHIC	5	1	P05708
Pre-frontal cortex	Streptozocin	0	M[15.9949]ISGMYLGEIVR	2	6	ENSRNOT00000031935,ENSRNOT00000008813,ENSRNOT00000079850,ENSRNOT00000072429,P05708,P27926
Pre-frontal cortex	Streptozocin	0	LLDDISNGYDDTEDGGHTLGDCSYSYETTEK	11	1	ENSRNOT00000023460
Pre-frontal cortex	Streptozocin	0	EWYQETHEK	7	1	ENSRNOT00000023460
Pre-frontal cortex	Streptozocin	0	TLHVEEVVPSVIEPSFGLGR	22	1	ENSRNOT00000014780
Pre-frontal cortex	Streptozocin	0	VPLVAEKPLKEPK	21	1	ENSRNOT00000014780
Pre-frontal cortex	Streptozocin	0	KSEMESVLAQLDNYGQQELADLFVNYNVK	2	1	ENSRNOT00000014780
Pre-frontal cortex	Streptozocin	0	LAKPLSSLTPL	1	3	ENSRNOT00000049862,ENSRNOT00000089141,ENSRNOT00000049321
Pre-frontal cortex	Streptozocin	0	YELLNVLEFTSSR	16	1	ENSRNOT00000044017
Pre-frontal cortex	Streptozocin	0	SESLQQNLLHGYAFSQDENGIVSQSEVIR	3	1	ENSRNOT00000044017
Pre-frontal cortex	Streptozocin	0	TLVDEVQELEAK	9	1	ENSRNOT00000044017
Pre-frontal cortex	Streptozocin	0	LDGHGTVPLGADQILLR	18	1	ENSRNOT00000044017
Pre-frontal cortex	Streptozocin	0	TEIVQLLLQH	19	7	ENSRNOT00000014962,ENSRNOT00000084756,ENSRNOT00000080470,ENSRNOT00000089534,ENSRNOT00000055615,ENSRNOT00000080637,ENSRNOT00000037255
Pre-frontal cortex	Streptozocin	0	IDIVTLLEGPIFDYGNISGTR	26	13	ENSRNOT00000082181,ENSRNOT00000091044,ENSRNOT00000079630,ENSRNOT00000077620,ENSRNOT00000090273,ENSRNOT00000085985,O70511,O70511-2,O70511-3,O70511-4,O70511-5,O70511-6,O70511-7
Pre-frontal cortex	Streptozocin	0	DGEAVWFGCDVGK	11	2	ENSRNOT00000005125,P70645
Pre-frontal cortex	Streptozocin	0	LNSDPQFVLAQNVGTTHDLLDICLK	17	2	ENSRNOT00000005125,P70645
Pre-frontal cortex	Streptozocin	0	GSVAEAEDCYNTALR	15	4	ENSRNOT00000082967,ENSRNOT00000004692,ENSRNOT00000075963,P56558
Pre-frontal cortex	Streptozocin	0	MLSFQGLAELAHR	3	2	ENSRNOT00000082967,ENSRNOT00000075963
Pre-frontal cortex	Streptozocin	0	CPDGGDNADTTNTALNM[15.9949]PVIPMNTIAEAVIEMINR	1	4	ENSRNOT00000082967,ENSRNOT00000004692,ENSRNOT00000075963,P56558
Pre-frontal cortex	Streptozocin	0	SLSAEPIQGPYK	6	11	ENSRNOT00000079192,ENSRNOT00000081488,ENSRNOT00000044408,ENSRNOT00000019969,ENSRNOT00000087441,ENSRNOT00000072465,ENSRNOT00000041957,Q03626,Q03626-2,P14046,Q6IE52
Pre-frontal cortex	Streptozocin	0	DLFHCVSF	2	5	ENSRNOT00000079192,ENSRNOT00000081488,ENSRNOT00000044408,P14046,Q6IE52
Pre-frontal cortex	Streptozocin	0	DGSYSAFGDHNGQGQGNTWLTAF	1	10	ENSRNOT00000079192,ENSRNOT00000081488,ENSRNOT00000044408,ENSRNOT00000019969,ENSRNOT00000087441,ENSRNOT00000072465,Q03626,Q03626-2,P14046,Q6IE52
Pre-frontal cortex	Streptozocin	0	ESSCIHSSCTAER	2	8	ENSRNOT00000079192,ENSRNOT00000081488,ENSRNOT00000044408,ENSRNOT00000019969,ENSRNOT00000087441,Q03626,Q03626-2,P14046
Pre-frontal cortex	Streptozocin	0	HGIPFFVK	8	11	ENSRNOT00000079192,ENSRNOT00000081488,ENSRNOT00000044408,ENSRNOT00000019969,ENSRNOT00000087441,ENSRNOT00000072465,ENSRNOT00000041957,Q03626,Q03626-2,P14046,Q6IE52
Pre-frontal cortex	Streptozocin	0	LFDELVVDK	6	8	ENSRNOT00000079192,ENSRNOT00000081488,ENSRNOT00000044408,ENSRNOT00000019969,ENSRNOT00000087441,Q03626,Q03626-2,P14046
Pre-frontal cortex	Streptozocin	0	SPLPQEPPR	5	3	ENSRNOT00000081488,ENSRNOT00000044408,P14046
Pre-frontal cortex	Streptozocin	0	EHTFSSLLCASDAELSETLSLLLPPTVVK	31	8	ENSRNOT00000079192,ENSRNOT00000081488,ENSRNOT00000044408,ENSRNOT00000019969,ENSRNOT00000087441,Q03626,Q03626-2,P14046
Pre-frontal cortex	Streptozocin	0	HAEAHHTAYAVYSLSK	2	6	ENSRNOT00000081488,ENSRNOT00000044408,ENSRNOT00000072465,ENSRNOT00000041957,P14046,Q6IE52
Pre-frontal cortex	Streptozocin	0	MLSGFIPLKPTVK	14	11	ENSRNOT00000079192,ENSRNOT00000081488,ENSRNOT00000044408,ENSRNOT00000019969,ENSRNOT00000087441,ENSRNOT00000072465,ENSRNOT00000041957,Q03626,Q03626-2,P14046,Q6IE52
Pre-frontal cortex	Streptozocin	0	EDNSIHWERPQKPTK	1	8	ENSRNOT00000079192,ENSRNOT00000081488,ENSRNOT00000044408,ENSRNOT00000019969,ENSRNOT00000087441,Q03626,Q03626-2,P14046
Pre-frontal cortex	Streptozocin	0	LSFSLSAEPIQGPYK	1	11	ENSRNOT00000079192,ENSRNOT00000081488,ENSRNOT00000044408,ENSRNOT00000019969,ENSRNOT00000087441,ENSRNOT00000072465,ENSRNOT00000041957,Q03626,Q03626-2,P14046,Q6IE52
Pre-frontal cortex	Streptozocin	0	DLFHCLSF	3	4	ENSRNOT00000019969,ENSRNOT00000087441,Q03626,Q03626-2
Pre-frontal cortex	Streptozocin	0	GGEFEMMPLGVNK	6	3	ENSRNOT00000019969,Q03626,Q03626-2
Pre-frontal cortex	Streptozocin	0	DAAGLESQLQDTQELLQEETR	32	2	ENSRNOT00000065895,Q9JLT0
Pre-frontal cortex	Streptozocin	0	ALEQQVEEMR	13	2	ENSRNOT00000065895,Q9JLT0
Pre-frontal cortex	Streptozocin	0	AVIYNPATQADWTAK	16	2	ENSRNOT00000065895,Q9JLT0
Pre-frontal cortex	Streptozocin	0	AGVLAHLEEER	24	3	ENSRNOT00000037611,ENSRNOT00000065895,Q9JLT0
Pre-frontal cortex	Streptozocin	0	LDAQVQELHAK	9	2	ENSRNOT00000065895,Q9JLT0
Pre-frontal cortex	Streptozocin	0	VIQYLAHVASSHK	12	4	ENSRNOT00000037611,ENSRNOT00000065895,Q62812,Q9JLT0
Pre-frontal cortex	Streptozocin	0	ATISALEAK	2	2	ENSRNOT00000065895,Q9JLT0
Pre-frontal cortex	Streptozocin	0	ADEWLMK	7	4	ENSRNOT00000037611,ENSRNOT00000065895,Q62812,Q9JLT0
Pre-frontal cortex	Streptozocin	0	LCHLLGMNVMEF	3	2	ENSRNOT00000065895,Q9JLT0
Pre-frontal cortex	Streptozocin	0	HMDPSGTFVQCDAR	17	2	ENSRNOT00000026928,P34064
Pre-frontal cortex	Streptozocin	0	IGCAMSGLIADAK	12	2	ENSRNOT00000026928,P34064
Pre-frontal cortex	Streptozocin	0	GNLEVLLFTIQSK	42	5	ENSRNOT00000088288,ENSRNOT00000083528,ENSRNOT00000008210,ENSRNOT00000084595,Q9QWN8
Pre-frontal cortex	Streptozocin	0	VLDHAMEAEHLVEK	22	2	ENSRNOT00000088288,Q9QWN8
Pre-frontal cortex	Streptozocin	0	HRPDLLDFESLK	19	2	ENSRNOT00000088288,Q9QWN8
Pre-frontal cortex	Streptozocin	0	VVAASHELGQDYEHVTMLR	8	2	ENSRNOT00000088288,Q9QWN8
Pre-frontal cortex	Streptozocin	0	AALTSALSIQNYHLECTETQAWMR	15	2	ENSRNOT00000088288,Q9QWN8
Pre-frontal cortex	Streptozocin	0	DAAEAEAWMGEQELH	6	2	ENSRNOT00000088288,Q9QWN8
Pre-frontal cortex	Streptozocin	0	VQAVDAVAAELAAEHYHDIK	23	2	ENSRNOT00000088288,Q9QWN8
Pre-frontal cortex	Streptozocin	0	HCAYEHDIQALSTQVQQVQDDGLR	26	2	ENSRNOT00000088288,Q9QWN8
Pre-frontal cortex	Streptozocin	0	KNQEAVQQLLGR	7	2	ENSRNOT00000088288,Q9QWN8
Pre-frontal cortex	Streptozocin	0	WVNSHLAR	17	7	ENSRNOT00000077651,ENSRNOT00000088288,ENSRNOT00000009028,ENSRNOT00000083528,ENSRNOT00000008210,ENSRNOT00000084595,Q9QWN8
Pre-frontal cortex	Streptozocin	0	SIITYVATYYHYFSK	19	2	ENSRNOT00000088288,Q9QWN8
Pre-frontal cortex	Streptozocin	0	LEALAEER	9	2	ENSRNOT00000088288,Q9QWN8
Pre-frontal cortex	Streptozocin	0	ALLLWCQMK	13	7	ENSRNOT00000077651,ENSRNOT00000088288,ENSRNOT00000009028,ENSRNOT00000083528,ENSRNOT00000008210,ENSRNOT00000084595,Q9QWN8
Pre-frontal cortex	Streptozocin	0	LTLEKPELK	7	2	ENSRNOT00000088288,Q9QWN8
Pre-frontal cortex	Streptozocin	0	LEDLHR	2	3	ENSRNOT00000085545,ENSRNOT00000088288,Q9QWN8
Pre-frontal cortex	Streptozocin	0	HEIELR	1	5	ENSRNOT00000088288,Q2TA68,Q2TA68-2,Q2TA68-3,Q9QWN8
Pre-frontal cortex	Streptozocin	0	QQQLPDGTGR	2	2	ENSRNOT00000088288,Q9QWN8
Pre-frontal cortex	Streptozocin	0	DNYVNTIGHR	11	2	ENSRNOT00000011784,P23965
Pre-frontal cortex	Streptozocin	0	KGITWGEDTLMEYLENPK	29	1	P62898
Pre-frontal cortex	Streptozocin	0	VHCCLYF	13	22	ENSRNOT00000076995,ENSRNOT00000076050,ENSRNOT00000044226,ENSRNOT00000076841,ENSRNOT00000055012,ENSRNOT00000041168,ENSRNOT00000076026,ENSRNOT00000010491,ENSRNOT00000003891,ENSRNOT00000051680,ENSRNOT00000076701,ENSRNOT00000085052,Q9JJM9,Q9JJM9-2,Q9JJM9-3,Q9QZR6,Q9QZR6-2,Q9QZR6-3,Q9QZR6-4,Q9WU34,Q9WU34-2,Q9WU34-3
Pre-frontal cortex	Streptozocin	0	GFDFTLMVAGESGLGK	18	12	ENSRNOT00000076995,ENSRNOT00000076050,ENSRNOT00000044226,ENSRNOT00000076841,ENSRNOT00000055012,ENSRNOT00000041168,ENSRNOT00000076026,ENSRNOT00000051680,ENSRNOT00000085052,Q9JJM9,Q9JJM9-2,Q9JJM9-3
Pre-frontal cortex	Streptozocin	0	STLVNSLFLTDLYR	16	7	ENSRNOT00000076995,ENSRNOT00000076050,ENSRNOT00000044226,ENSRNOT00000076841,ENSRNOT00000076026,ENSRNOT00000076701,ENSRNOT00000085052
Pre-frontal cortex	Streptozocin	0	SEDLFNEMNWQK	3	12	ENSRNOT00000040255,ENSRNOT00000043646,ENSRNOT00000064025,ENSRNOT00000041130,P29994,P29994-2,P29994-3,P29994-4,P29994-5,P29994-6,P29994-7,P29994-8
Pre-frontal cortex	Streptozocin	0	AAVPSGASTGIYEALELR	96	5	ENSRNOT00000005612,ENSRNOT00000081579,ENSRNOT00000034026,ENSRNOT00000073655,P07323
Pre-frontal cortex	Streptozocin	0	AGYPDKVVIGMDVAASEFYR	3	1	ENSRNOT00000005612
Pre-frontal cortex	Streptozocin	0	DVAASEFYR	3	4	ENSRNOT00000005612,ENSRNOT00000081579,ENSRNOT00000073655,P07323
Pre-frontal cortex	Streptozocin	0	PTGVAVHPSGDIIIADYDNK	19	3	ENSRNOT00000085382,ENSRNOT00000067618,D3ZQG6
Pre-frontal cortex	Streptozocin	0	NKGEFTNLQGVAASTSGK	1	3	ENSRNOT00000085382,ENSRNOT00000067618,D3ZQG6
Pre-frontal cortex	Streptozocin	0	TDLLLDDSLVSLFGNR	24	3	ENSRNOT00000028687,Q9R063,Q9R063-2
Pre-frontal cortex	Streptozocin	0	VQLLADPTGAFGK	9	3	ENSRNOT00000028687,Q9R063,Q9R063-2
Pre-frontal cortex	Streptozocin	0	GLIAAICAGPTAL	7	2	ENSRNOT00000091206,ENSRNOT00000024711
Pre-frontal cortex	Streptozocin	0	ALVILAK	9	2	ENSRNOT00000091206,ENSRNOT00000024711
Pre-frontal cortex	Streptozocin	0	MILEIAPTSDNDFGR	8	1	ENSRNOT00000082417
Pre-frontal cortex	Streptozocin	0	ASGSPDPAISWFR	8	1	ENSRNOT00000082417
Pre-frontal cortex	Streptozocin	0	IEIFQTLPVR	16	1	ENSRNOT00000082417
Pre-frontal cortex	Streptozocin	0	IFVVDSNDR	7	8	ENSRNOT00000017692,ENSRNOT00000010429,ENSRNOT00000080028,ENSRNOT00000087181,ENSRNOT00000083224,ENSRNOT00000006483,ENSRNOT00000087176,P61206
Pre-frontal cortex	Streptozocin	0	LATATETYIKPISK	22	4	ENSRNOT00000082288,ENSRNOT00000079535,ENSRNOT00000091789,Q9QYF3
Pre-frontal cortex	Streptozocin	0	LGNADSFHYTK	21	4	ENSRNOT00000082288,ENSRNOT00000079535,ENSRNOT00000091789,Q9QYF3
Pre-frontal cortex	Streptozocin	0	HEPLIIFCDLMGVDYEEMCHWLCHR	4	4	ENSRNOT00000082288,ENSRNOT00000079535,ENSRNOT00000091789,Q9QYF3
Pre-frontal cortex	Streptozocin	0	AISPTSATSSGR	1	4	ENSRNOT00000082288,ENSRNOT00000079535,ENSRNOT00000091789,Q9QYF3
Pre-frontal cortex	Streptozocin	0	YGSGEPSPVSETVVTPEAAPEK	7	2	ENSRNOT00000080945,ENSRNOT00000084390
Pre-frontal cortex	Streptozocin	0	FQLQATTQQGPGEAIVR	1	2	ENSRNOT00000080945,ENSRNOT00000084390
Pre-frontal cortex	Streptozocin	0	TLQLLNVGEEDDGEYTCLAENSLGSAR	1	4	ENSRNOT00000080945,ENSRNOT00000084390,Q05695,Q05695-2
Pre-frontal cortex	Streptozocin	0	NIATSLHEICSK	1	3	ENSRNOT00000090181,P46933,P46933-2
Pre-frontal cortex	Streptozocin	0	SIAGGTDNPHIGDDPGIFITK	3	6	Q63622,Q63622-2,Q63622-3,Q63622-4,Q63622-6,Q63622-7
Pre-frontal cortex	Streptozocin	0	GAGQTVTIIAQYQPEDYAR	3	7	Q63622,Q63622-2,Q63622-3,Q63622-4,Q63622-5,Q63622-6,Q63622-7
Pre-frontal cortex	Streptozocin	0	GDIPGLGDDGYGTK	8	5	Q63622,Q63622-2,Q63622-3,Q63622-4,Q63622-5
Pre-frontal cortex	Streptozocin	0	TSLPPISPGR	2	7	Q63622,Q63622-2,Q63622-3,Q63622-4,Q63622-5,Q63622-6,Q63622-7
Pre-frontal cortex	Streptozocin	0	VQGFESSTFQGYFK	4	2	ENSRNOT00000078939,Q68FP1-2
Pre-frontal cortex	Streptozocin	0	PAHLMSLFGGK	5	2	ENSRNOT00000078939,Q68FP1-2
Pre-frontal cortex	Streptozocin	0	PSNLLLNTTCDLK	2	3	ENSRNOT00000002533,ENSRNOT00000087625,P21708-2
Pre-frontal cortex	Streptozocin	0	YSQKEDKYEEEIK	15	17	ENSRNOT00000024617,ENSRNOT00000023567,ENSRNOT00000090288,ENSRNOT00000029076,ENSRNOT00000024493,ENSRNOT00000085894,ENSRNOT00000057641,ENSRNOT00000040808,Q63610-2,Q63610-3,P04692-2,P04692-3,P04692-4,P04692-5,P04692-6,P04692-7,P04692-8
Pre-frontal cortex	Streptozocin	0	MEIQEMQLK	6	4	ENSRNOT00000021073,ENSRNOT00000089056,ENSRNOT00000022801,P58775-2
Pre-frontal cortex	Streptozocin	0	NEENTEPGAESAENADDPNK	2	2	ENSRNOT00000026949,P43244
Pre-frontal cortex	Streptozocin	0	GNLGAGNGNLQGPR	1	2	ENSRNOT00000026949,P43244
Pre-frontal cortex	Streptozocin	0	LSAAGIGLLAAATQSLSMPASLGR	4	2	ENSRNOT00000026949,P43244
Pre-frontal cortex	Streptozocin	0	EGDAFELTCEATGK	1	4	ENSRNOT00000052392,ENSRNOT00000079797,Q6AYP5,Q6AYP5-2
Pre-frontal cortex	Streptozocin	0	YFCQLYTDPPQESYTTITVLVPPR	3	4	ENSRNOT00000052392,ENSRNOT00000079797,Q6AYP5,Q6AYP5-2
Pre-frontal cortex	Streptozocin	0	DYPEVPVFLLGH	12	2	ENSRNOT00000029125,ENSRNOT00000077231
Pre-frontal cortex	Streptozocin	0	HLNLAENSSYIHVYR	38	2	ENSRNOT00000090820,Q9Z0W5
Pre-frontal cortex	Streptozocin	0	ELEQALR	1	2	ENSRNOT00000090820,Q9Z0W5
Pre-frontal cortex	Streptozocin	0	AWGAMMTEADKVSELHQEVK	13	2	ENSRNOT00000090820,Q9Z0W5
Pre-frontal cortex	Streptozocin	0	GRLDSGQLGLYPANYVEAI	1	2	ENSRNOT00000090820,Q9Z0W5
Pre-frontal cortex	Streptozocin	0	EVEAVDSEYQLAR	2	4	ENSRNOT00000010462,ENSRNOT00000010440,P47245,P47245-2
Pre-frontal cortex	Streptozocin	0	FLTAIK	1	8	ENSRNOT00000078073,ENSRNOT00000090026,ENSRNOT00000031164,ENSRNOT00000025303,ENSRNOT00000079433,P47197,P13264,P13264-2
Pre-frontal cortex	Streptozocin	0	VEEIWQEFLAPGAPSAINLDSHSYEITSQNVK	4	3	ENSRNOT00000058181,ENSRNOT00000086136,P49801
Pre-frontal cortex	Streptozocin	0	AIFLADGNVFTTGFSR	17	1	ENSRNOT00000000886
Pre-frontal cortex	Streptozocin	0	KCEPIIMTVPR	27	1	ENSRNOT00000000886
Pre-frontal cortex	Streptozocin	0	KQDGAVAMEMQPLK	2	13	ENSRNOT00000078100,Q64568,Q64568-2,Q64568-3,Q64568-4,Q64568-5,Q64568-6,Q64568-7,Q64568-8,Q64568-9,Q64568-10,Q64568-11,Q64568-12
Pre-frontal cortex	Streptozocin	0	LFDIDSGR	7	4	ENSRNOT00000004078,Q64542-2,Q64542-3,Q64542-4
Pre-frontal cortex	Streptozocin	0	GGPPFAFVEFEDPR	17	1	ENSRNOT00000073005
Pre-frontal cortex	Streptozocin	0	ADGLAIIGVLMK	15	1	ENSRNOT00000014267
Pre-frontal cortex	Streptozocin	0	SISLSPEQLAQLR	7	1	ENSRNOT00000014267
Pre-frontal cortex	Streptozocin	0	APSHQGPVEPDPMLSFTPVTLQSRPEPSSGDGAPVPEPPK	5	1	ENSRNOT00000072262
Pre-frontal cortex	Streptozocin	0	GLVGWVK	12	2	ENSRNOT00000067998,P35745
Pre-frontal cortex	Streptozocin	0	INCLEGSHEFFEAIGFK	19	2	ENSRNOT00000070986,ENSRNOT00000089071
Pre-frontal cortex	Streptozocin	0	LDGIDQNLWVEFGK	2	3	ENSRNOT00000021865,Q08415,Q08415-1
Pre-frontal cortex	Streptozocin	0	MPDLPGAEDEPYDR	1	3	ENSRNOT00000021865,Q08415,Q08415-1
Pre-frontal cortex	Streptozocin	0	ILVLNTPNNPLGK	1	3	ENSRNOT00000021865,Q08415,Q08415-1
Pre-frontal cortex	Streptozocin	0	FANFDFDVWR	7	5	ENSRNOT00000084109,ENSRNOT00000081482,ENSRNOT00000091828,ENSRNOT00000045400,D3ZHV2
Pre-frontal cortex	Streptozocin	0	FFLGNQFGDSQQLR	7	3	ENSRNOT00000044452,ENSRNOT00000084109,ENSRNOT00000081482
Pre-frontal cortex	Streptozocin	0	NDECVLEDNSQR	9	5	ENSRNOT00000084109,ENSRNOT00000081482,ENSRNOT00000091828,ENSRNOT00000045400,D3ZHV2
Pre-frontal cortex	Streptozocin	0	AILEQQVLAEELTTK	2	5	ENSRNOT00000084109,ENSRNOT00000081482,ENSRNOT00000091828,ENSRNOT00000045400,D3ZHV2
Pre-frontal cortex	Streptozocin	0	LSGQSAISTQPDAVK	14	5	ENSRNOT00000084109,ENSRNOT00000081482,ENSRNOT00000091828,ENSRNOT00000045400,D3ZHV2
Pre-frontal cortex	Streptozocin	0	TELVAISSSEDEGSLR	3	5	ENSRNOT00000084109,ENSRNOT00000081482,ENSRNOT00000091828,ENSRNOT00000045400,D3ZHV2
Pre-frontal cortex	Streptozocin	0	DIEGFLEENQNK	2	5	ENSRNOT00000084109,ENSRNOT00000081482,ENSRNOT00000091828,ENSRNOT00000045400,D3ZHV2
Pre-frontal cortex	Streptozocin	0	EFENWLER	2	5	ENSRNOT00000084109,ENSRNOT00000081482,ENSRNOT00000091828,ENSRNOT00000045400,D3ZHV2
Pre-frontal cortex	Streptozocin	0	QLQVDLQILR	4	5	ENSRNOT00000084109,ENSRNOT00000081482,ENSRNOT00000091828,ENSRNOT00000045400,D3ZHV2
Pre-frontal cortex	Streptozocin	0	ENLEQAFEVAER	3	5	ENSRNOT00000084109,ENSRNOT00000081482,ENSRNOT00000091828,ENSRNOT00000045400,D3ZHV2
Pre-frontal cortex	Streptozocin	0	VIEVELAK	2	5	ENSRNOT00000084109,ENSRNOT00000081482,ENSRNOT00000091828,ENSRNOT00000045400,D3ZHV2
Pre-frontal cortex	Streptozocin	0	SLLEILNSAADILINSSEIDEDEIRDEK	17	5	ENSRNOT00000084109,ENSRNOT00000081482,ENSRNOT00000091828,ENSRNOT00000045400,D3ZHV2
Pre-frontal cortex	Streptozocin	0	LHDVEHVLIDVGTGYYVEK	1	1	ENSRNOT00000017794
Pre-frontal cortex	Streptozocin	0	HVPGGGSVHIVYKPVDLSK	1	7	P19332,P19332-2,P19332-3,P19332-4,P19332-5,P19332-6,P19332-8
Pre-frontal cortex	Streptozocin	0	NDKGDIIVTTK	4	2	ENSRNOT00000092101,O54921
Pre-frontal cortex	Streptozocin	0	VTLYDPMSGVLTSVQTK	14	3	ENSRNOT00000088391,ENSRNOT00000090258,Q62940
Pre-frontal cortex	Streptozocin	0	EVPIVQTETK	2	2	ENSRNOT00000061332,ENSRNOT00000017322
Pre-frontal cortex	Streptozocin	0	NGVNALQLDPALNR	3	2	ENSRNOT00000024172,ENSRNOT00000082356
Pre-frontal cortex	Streptozocin	0	TTYGTSAPSMTSAALR	15	1	Q8CG45
Pre-frontal cortex	Streptozocin	0	VPAQQLQEAGILSMEELQR	14	13	ENSRNOT00000081021,ENSRNOT00000091285,ENSRNOT00000091840,ENSRNOT00000040762,ENSRNOT00000086550,ENSRNOT00000042642,ENSRNOT00000006311,ENSRNOT00000082271,ENSRNOT00000083429,P30427,P30427-2,P30427-3,P30427-4
Pre-frontal cortex	Streptozocin	0	GYFDEEMNR	13	13	ENSRNOT00000081021,ENSRNOT00000091285,ENSRNOT00000091840,ENSRNOT00000040762,ENSRNOT00000086550,ENSRNOT00000042642,ENSRNOT00000006311,ENSRNOT00000082271,ENSRNOT00000083429,P30427,P30427-2,P30427-3,P30427-4
Pre-frontal cortex	Streptozocin	0	QEEVYSELQAR	13	13	ENSRNOT00000081021,ENSRNOT00000091285,ENSRNOT00000091840,ENSRNOT00000040762,ENSRNOT00000086550,ENSRNOT00000042642,ENSRNOT00000006311,ENSRNOT00000082271,ENSRNOT00000083429,P30427,P30427-2,P30427-3,P30427-4
Pre-frontal cortex	Streptozocin	0	QLEMSAEAER	6	13	ENSRNOT00000081021,ENSRNOT00000091285,ENSRNOT00000091840,ENSRNOT00000040762,ENSRNOT00000086550,ENSRNOT00000042642,ENSRNOT00000006311,ENSRNOT00000082271,ENSRNOT00000083429,P30427,P30427-2,P30427-3,P30427-4
Pre-frontal cortex	Streptozocin	0	LAEVEAALEK	13	13	ENSRNOT00000081021,ENSRNOT00000091285,ENSRNOT00000091840,ENSRNOT00000040762,ENSRNOT00000086550,ENSRNOT00000042642,ENSRNOT00000006311,ENSRNOT00000082271,ENSRNOT00000083429,P30427,P30427-2,P30427-3,P30427-4
Pre-frontal cortex	Streptozocin	0	QVEEEIMALK	9	13	ENSRNOT00000081021,ENSRNOT00000091285,ENSRNOT00000091840,ENSRNOT00000040762,ENSRNOT00000086550,ENSRNOT00000042642,ENSRNOT00000006311,ENSRNOT00000082271,ENSRNOT00000083429,P30427,P30427-2,P30427-3,P30427-4
Pre-frontal cortex	Streptozocin	0	QLLSPGTALILLEAQAASGFLLDPVR	26	13	ENSRNOT00000081021,ENSRNOT00000091285,ENSRNOT00000091840,ENSRNOT00000040762,ENSRNOT00000086550,ENSRNOT00000042642,ENSRNOT00000006311,ENSRNOT00000082271,ENSRNOT00000083429,P30427,P30427-2,P30427-3,P30427-4
Pre-frontal cortex	Streptozocin	0	AFCGFEDPR	6	13	ENSRNOT00000081021,ENSRNOT00000091285,ENSRNOT00000091840,ENSRNOT00000040762,ENSRNOT00000086550,ENSRNOT00000042642,ENSRNOT00000006311,ENSRNOT00000082271,ENSRNOT00000083429,P30427,P30427-2,P30427-3,P30427-4
Pre-frontal cortex	Streptozocin	0	GLVEDTLR	10	13	ENSRNOT00000081021,ENSRNOT00000091285,ENSRNOT00000091840,ENSRNOT00000040762,ENSRNOT00000086550,ENSRNOT00000042642,ENSRNOT00000006311,ENSRNOT00000082271,ENSRNOT00000083429,P30427,P30427-2,P30427-3,P30427-4
Pre-frontal cortex	Streptozocin	0	LQAEEVAQQK	8	13	ENSRNOT00000081021,ENSRNOT00000091285,ENSRNOT00000091840,ENSRNOT00000040762,ENSRNOT00000086550,ENSRNOT00000042642,ENSRNOT00000006311,ENSRNOT00000082271,ENSRNOT00000083429,P30427,P30427-2,P30427-3,P30427-4
Pre-frontal cortex	Streptozocin	0	AGLVGPEMHEK	2	13	ENSRNOT00000081021,ENSRNOT00000091285,ENSRNOT00000091840,ENSRNOT00000040762,ENSRNOT00000086550,ENSRNOT00000042642,ENSRNOT00000006311,ENSRNOT00000082271,ENSRNOT00000083429,P30427,P30427-2,P30427-3,P30427-4
Pre-frontal cortex	Streptozocin	0	TSQQNVSNASEGSTWNPFDDDNFSK	2	2	ENSRNOT00000043082,P0C1X8
Pre-frontal cortex	Streptozocin	0	ILVGPGTGIAPFR	11	7	ENSRNOT00000001493,ENSRNOT00000066810,ENSRNOT00000013058,Q62600,P29476,P29476-2,P29476-3
Pre-frontal cortex	Streptozocin	0	YHPDKNPDNPEAADK	18	2	ENSRNOT00000020581,ENSRNOT00000086046
Pre-frontal cortex	Streptozocin	0	AILTDATK	6	2	ENSRNOT00000020581,ENSRNOT00000086046
Pre-frontal cortex	Streptozocin	0	VLDQYEQEGFTFLAK	6	1	ENSRNOT00000067532
Pre-frontal cortex	Streptozocin	0	FDNVLPVSLAFDK	9	1	ENSRNOT00000067532
Pre-frontal cortex	Streptozocin	0	FAQENELM[15.9949]FLETSALTGENVEEAFMQCAR	2	1	ENSRNOT00000049337
Pre-frontal cortex	Streptozocin	0	LTAEEEEAQR	3	3	ENSRNOT00000086396,ENSRNOT00000047289,P48768
Pre-frontal cortex	Streptozocin	0	LINSAGDIFLEK	11	2	ENSRNOT00000025675,P53678
Pre-frontal cortex	Streptozocin	0	LLDDVSFHPC	4	4	ENSRNOT00000016387,ENSRNOT00000025675,P53678,P53676
Pre-frontal cortex	Streptozocin	0	YDAFLASESLIK	1	2	ENSRNOT00000071701,P62907
Pre-frontal cortex	Streptozocin	0	NSDPWAASQQPASDAGK	3	4	ENSRNOT00000085703,ENSRNOT00000091963,ENSRNOT00000087102,Q9Z1Z3
Pre-frontal cortex	Streptozocin	0	LQMALEESR	7	4	ENSRNOT00000085703,ENSRNOT00000091963,ENSRNOT00000087102,Q9Z1Z3
Pre-frontal cortex	Streptozocin	0	VAQLCDFNPK	12	2	ENSRNOT00000023651,P08082-2
Pre-frontal cortex	Streptozocin	0	QTPLSR	1	2	ENSRNOT00000023651,P08082-2
Pre-frontal cortex	Streptozocin	0	DGWIQNLQLLMER	1	6	ENSRNOT00000052138,ENSRNOT00000016221,P49816,P49816-2,P49816-3,P49816-4
Pre-frontal cortex	Streptozocin	0	CALMEQVAHQTMVMQF	1	3	ENSRNOT00000042314,ENSRNOT00000079949,Q63692
Pre-frontal cortex	Streptozocin	0	ELEVAEGGGQVELER	13	3	ENSRNOT00000042314,ENSRNOT00000079949,Q63692
Pre-frontal cortex	Streptozocin	0	DATLTEHVIR	4	1	ENSRNOT00000028542
Pre-frontal cortex	Streptozocin	0	CVVQFLEK	7	5	ENSRNOT00000028542,ENSRNOT00000007595,ENSRNOT00000086143,ENSRNOT00000022862,ENSRNOT00000000078
Pre-frontal cortex	Streptozocin	0	EKIPDPHALR	1	1	Q6AYQ8
Pre-frontal cortex	Streptozocin	0	NNSIWDELFFNK	12	3	ENSRNOT00000058817,ENSRNOT00000030760,P33124-2
Pre-frontal cortex	Streptozocin	0	SVIGDCTQLLTHYYDDAR	26	3	ENSRNOT00000058817,ENSRNOT00000030760,P33124-2
Pre-frontal cortex	Streptozocin	0	AILLLEHVER	19	3	ENSRNOT00000058817,ENSRNOT00000030760,P33124-2
Pre-frontal cortex	Streptozocin	0	SPSAEGAAPPPGPR	17	1	ENSRNOT00000024258
Pre-frontal cortex	Streptozocin	0	QSDGTPYSSAQPR	9	1	ENSRNOT00000024258
Pre-frontal cortex	Streptozocin	0	MVQQCCTYVEEITDLPVK	14	1	ENSRNOT00000004283
Pre-frontal cortex	Streptozocin	0	SVVLYVILAPFDNEQSDLVHR	27	1	ENSRNOT00000004283
Pre-frontal cortex	Streptozocin	0	EEMIHNLQ	2	1	ENSRNOT00000004283
Pre-frontal cortex	Streptozocin	0	NSWGLHFGDQGYIR	3	2	ENSRNOT00000028732,Q02765
Pre-frontal cortex	Streptozocin	0	ILEVHVDK	36	3	ENSRNOT00000022573,ENSRNOT00000017053,O35824
Pre-frontal cortex	Streptozocin	0	SNVASTAACSSASSLGLGLAYR	21	2	ENSRNOT00000027417,P23565
Pre-frontal cortex	Streptozocin	0	NLQSAEEWYK	12	2	ENSRNOT00000027417,P23565
Pre-frontal cortex	Streptozocin	0	RLPASDGLDLSQAAAR	7	2	ENSRNOT00000027417,P23565
Pre-frontal cortex	Streptozocin	0	SSASSLGLGLAYR	2	2	ENSRNOT00000027417,P23565
Pre-frontal cortex	Streptozocin	0	VLNMAAENNPNIK	3	20	ENSRNOT00000064872,Q07310,Q07310-2,Q07310-3,Q07310-4,Q07310-5,Q07310-6,Q07310-7,Q07310-8,Q07310-9,Q07310-10,Q07310-11,Q07310-12,Q07310-13,Q07310-14,Q07310-15,Q07310-16,Q07310-17,Q07310-18,Q07310-19
Pre-frontal cortex	Streptozocin	0	LTVDDDVAEGTMVGDHTR	3	20	ENSRNOT00000064872,Q07310,Q07310-2,Q07310-3,Q07310-4,Q07310-5,Q07310-6,Q07310-7,Q07310-8,Q07310-9,Q07310-10,Q07310-11,Q07310-12,Q07310-13,Q07310-14,Q07310-15,Q07310-16,Q07310-17,Q07310-18,Q07310-19
Pre-frontal cortex	Streptozocin	0	LAVGFSTTVK	1	20	ENSRNOT00000064872,Q07310,Q07310-2,Q07310-3,Q07310-4,Q07310-5,Q07310-6,Q07310-7,Q07310-8,Q07310-9,Q07310-10,Q07310-11,Q07310-12,Q07310-13,Q07310-14,Q07310-15,Q07310-16,Q07310-17,Q07310-18,Q07310-19
Pre-frontal cortex	Streptozocin	0	QWLTTMLLR	2	3	ENSRNOT00000006329,ENSRNOT00000002044,P85969
Pre-frontal cortex	Streptozocin	0	FTLAAK	1	3	ENSRNOT00000006329,ENSRNOT00000002044,P85969
Pre-frontal cortex	Streptozocin	0	ATVGQAEEPIVGQAEETVLR	13	2	ENSRNOT00000008416,P24587
Pre-frontal cortex	Streptozocin	0	LTEDSGYVR	9	2	ENSRNOT00000008416,P24587
Pre-frontal cortex	Streptozocin	0	LMMNNEFIVPMTEETK	7	4	ENSRNOT00000023601,ENSRNOT00000067949,B0LPN4,B0LPN4-2
Pre-frontal cortex	Streptozocin	0	LMTEIIELAESGIR	12	4	ENSRNOT00000023601,ENSRNOT00000067949,B0LPN4,B0LPN4-2
Pre-frontal cortex	Streptozocin	0	EPNPEAEELFR	2	4	ENSRNOT00000023601,ENSRNOT00000067949,B0LPN4,B0LPN4-2
Pre-frontal cortex	Streptozocin	0	VGDDLILVSVSSER	2	6	ENSRNOT00000027893,ENSRNOT00000023601,ENSRNOT00000067949,F1LMY4,B0LPN4,B0LPN4-2
Pre-frontal cortex	Streptozocin	0	STVFLFNR	6	4	ENSRNOT00000023601,ENSRNOT00000067949,B0LPN4,B0LPN4-2
Pre-frontal cortex	Streptozocin	0	AEMCCTALNSEHMNTLLGNILK	8	4	ENSRNOT00000023601,ENSRNOT00000067949,B0LPN4,B0LPN4-2
Pre-frontal cortex	Streptozocin	0	DIGFNVAVLLTNLSEHMPNDTR	15	4	ENSRNOT00000023601,ENSRNOT00000067949,B0LPN4,B0LPN4-2
Pre-frontal cortex	Streptozocin	0	KPLESALPSEDLTDLK	1	4	ENSRNOT00000023601,ENSRNOT00000067949,B0LPN4,B0LPN4-2
Pre-frontal cortex	Streptozocin	0	LYFLSAASR	2	4	ENSRNOT00000023601,ENSRNOT00000067949,B0LPN4,B0LPN4-2
Pre-frontal cortex	Streptozocin	0	LANGWIYGEIYSDSSK	1	4	ENSRNOT00000023601,ENSRNOT00000067949,B0LPN4,B0LPN4-2
Pre-frontal cortex	Streptozocin	0	ILITTVPPNLR	10	2	ENSRNOT00000077362,Q7TP98
Pre-frontal cortex	Streptozocin	0	VKPAPDETSFSEALLK	11	2	ENSRNOT00000077362,Q7TP98
Pre-frontal cortex	Streptozocin	0	SLPGMDPDWLIGER	5	3	ENSRNOT00000085042,ENSRNOT00000023527,Q5PPJ9
Pre-frontal cortex	Streptozocin	0	SMATIMTDEIFHDVAYK	1	4	ENSRNOT00000040890,Q6RVG2,Q6RVG2-2,Q6RVG2-3
Pre-frontal cortex	Streptozocin	0	ATEPVISFYDK	12	1	P39069
Pre-frontal cortex	Streptozocin	0	FDFPFTR	12	3	ENSRNOT00000039663,ENSRNOT00000082138,Q2TL32
Pre-frontal cortex	Streptozocin	0	ITVLQLSALLK	16	3	ENSRNOT00000039663,ENSRNOT00000082138,Q2TL32
Pre-frontal cortex	Streptozocin	0	ACAEIAAQR	11	3	ENSRNOT00000039663,ENSRNOT00000082138,Q2TL32
Pre-frontal cortex	Streptozocin	0	IYDLSVDALSPTFYFLLPSSK	1	3	ENSRNOT00000039663,ENSRNOT00000082138,Q2TL32
Pre-frontal cortex	Streptozocin	0	YAMGDAPDYDR	14	3	ENSRNOT00000047139,ENSRNOT00000025746,P04905
Pre-frontal cortex	Streptozocin	0	TGAFSIPVIQIVYETLK	22	1	ENSRNOT00000009100
Pre-frontal cortex	Streptozocin	0	GSAFAIGSDGLCCQSR	17	1	ENSRNOT00000009100
Pre-frontal cortex	Streptozocin	0	ELAEQTLNNVK	3	1	ENSRNOT00000009100
Pre-frontal cortex	Streptozocin	0	QMSQLEEELGTAHR	13	2	ENSRNOT00000028142,Q91Z79
Pre-frontal cortex	Streptozocin	0	QLSIALPQEFAALTK	21	2	ENSRNOT00000028142,Q91Z79
Pre-frontal cortex	Streptozocin	0	SGLEEPGKDGDGQTLANGLGPVGESSR	5	2	ENSRNOT00000028142,Q91Z79
Pre-frontal cortex	Streptozocin	0	QLEAQLEEK	3	2	ENSRNOT00000028142,Q91Z79
Pre-frontal cortex	Streptozocin	0	MGWVSGLGLK	1	2	ENSRNOT00000028142,Q91Z79
Pre-frontal cortex	Streptozocin	0	LAWYLR	7	1	Q62651
Pre-frontal cortex	Streptozocin	0	FRLDNLLNMAYGVK	1	6	ENSRNOT00000009034,ENSRNOT00000093007,ENSRNOT00000035252,ENSRNOT00000093032,ENSRNOT00000018416,Q8CH84
Pre-frontal cortex	Streptozocin	0	GFGFVTMTNYDEAAMAIASLNGYR	2	7	ENSRNOT00000009034,ENSRNOT00000093007,ENSRNOT00000092743,ENSRNOT00000035252,ENSRNOT00000093032,ENSRNOT00000018416,Q8CH84
Pre-frontal cortex	Streptozocin	0	ANLYVSGLPK	3	7	ENSRNOT00000009034,ENSRNOT00000093007,ENSRNOT00000092743,ENSRNOT00000035252,ENSRNOT00000093032,ENSRNOT00000018416,Q8CH84
Pre-frontal cortex	Streptozocin	0	SVSESSPGDSPVKPPEGSSGAAR	21	1	Q8VHK2
Pre-frontal cortex	Streptozocin	0	HLDLENNWMLVEK	21	3	ENSRNOT00000016709,ENSRNOT00000080274,Q64640
Pre-frontal cortex	Streptozocin	0	TFTLNLSAPFISQFFK	15	3	ENSRNOT00000016709,ENSRNOT00000080274,Q64640
Pre-frontal cortex	Streptozocin	0	FVSPLTLVADEGWFIAESR	39	2	ENSRNOT00000059401,ENSRNOT00000013005
Pre-frontal cortex	Streptozocin	0	NVPTDINFANAVSDALDSLK	3	2	ENSRNOT00000059401,ENSRNOT00000013005
Pre-frontal cortex	Streptozocin	0	KEFTLEFSR	4	8	ENSRNOT00000087723,ENSRNOT00000064840,ENSRNOT00000065181,Q64578,P11507,P11507-2,P18596,P18596-1
Pre-frontal cortex	Streptozocin	0	INTILEQVVILGK	4	4	ENSRNOT00000029031,ENSRNOT00000010367,P19492,P19492-2
Pre-frontal cortex	Streptozocin	0	EGYNVYGTESVK	3	4	ENSRNOT00000029031,ENSRNOT00000010367,P19492,P19492-2
Pre-frontal cortex	Streptozocin	0	IAFAITAIK	13	1	P62271
Pre-frontal cortex	Streptozocin	0	ILQCYVAELEATK	1	2	ENSRNOT00000071939,ENSRNOT00000000651
Pre-frontal cortex	Streptozocin	0	LVDYDSAR	1	14	ENSRNOT00000048262,ENSRNOT00000042287,ENSRNOT00000049898,ENSRNOT00000017573,ENSRNOT00000084702,ENSRNOT00000080800,ENSRNOT00000017102,O08839,O08839-2,O08839-3,O08839-4,O08839-5,O08839-6,O08838
Pre-frontal cortex	Streptozocin	0	ENLYPYLGPSTLR	1	1	ENSRNOT00000028751
Pre-frontal cortex	Streptozocin	0	QQLAAYQEEAER	14	3	ENSRNOT00000078266,ENSRNOT00000071804,Q9Z214-2
Pre-frontal cortex	Streptozocin	0	FELTELR	1	3	ENSRNOT00000078266,ENSRNOT00000071804,Q9Z214-2
Pre-frontal cortex	Streptozocin	0	LQNPDLDSEALLTLPLLQLVQK	21	1	P97612
Pre-frontal cortex	Streptozocin	0	AMNLDVLLTPMLGPALDLNTPGR	4	1	P97612
Pre-frontal cortex	Streptozocin	0	LADFGLAR	20	24	ENSRNOT00000011592,ENSRNOT00000032893,ENSRNOT00000012936,ENSRNOT00000011130,ENSRNOT00000085674,ENSRNOT00000076859,ENSRNOT00000000733,ENSRNOT00000085987,ENSRNOT00000012432,ENSRNOT00000015021,ENSRNOT00000071819,ENSRNOT00000075922,ENSRNOT00000005762,ENSRNOT00000018431,ENSRNOT00000011052,ENSRNOT00000009417,ENSRNOT00000010976,ENSRNOT00000064309,P50545-2,O35832,Q07014-2,Q01621,O35831,F1LM93
Pre-frontal cortex	Streptozocin	0	TNADVM[15.9949]TALSQGYRM[15.9949]PR	1	2	ENSRNOT00000011130,Q07014-2
Pre-frontal cortex	Streptozocin	0	HANIVTLHDLIHTDR	2	2	ENSRNOT00000010976,O35832
Pre-frontal cortex	Streptozocin	0	TIDLGAAAHYTGDK	3	1	ENSRNOT00000035346
Pre-frontal cortex	Streptozocin	0	PLTSPLDDAEVKK	13	1	ENSRNOT00000007554
Pre-frontal cortex	Streptozocin	0	VEQVLSLEPQHELK	28	1	ENSRNOT00000007554
Pre-frontal cortex	Streptozocin	0	IMPTSASK	1	1	ENSRNOT00000007554
Pre-frontal cortex	Streptozocin	0	LQENLQQFQH	2	2	ENSRNOT00000078048,G3V7P1
Pre-frontal cortex	Streptozocin	0	LQENLQQFQHSTNQLAK	10	2	ENSRNOT00000078048,G3V7P1
Pre-frontal cortex	Streptozocin	0	LPIFFFGTHETAFLGPK	4	4	ENSRNOT00000082239,ENSRNOT00000016130,Q812D1,Q812D1-2
Pre-frontal cortex	Streptozocin	0	ELTGLGNALK	1	2	ENSRNOT00000024973,P45953
Pre-frontal cortex	Streptozocin	0	GEATVSFDDPPSAK	19	5	ENSRNOT00000031891,ENSRNOT00000091122,ENSRNOT00000086987,ENSRNOT00000090259,ENSRNOT00000082030
Pre-frontal cortex	Streptozocin	0	AAIDWFDGK	13	5	ENSRNOT00000031891,ENSRNOT00000091122,ENSRNOT00000086987,ENSRNOT00000090259,ENSRNOT00000082030
Pre-frontal cortex	Streptozocin	0	VSFATR	3	5	ENSRNOT00000031891,ENSRNOT00000091122,ENSRNOT00000086987,ENSRNOT00000090259,ENSRNOT00000082030
Pre-frontal cortex	Streptozocin	0	EYLQTHWEEEECQQDVSLLR	19	1	ENSRNOT00000003083
Pre-frontal cortex	Streptozocin	0	QQIQSIQQSIER	5	1	P55770
Pre-frontal cortex	Streptozocin	0	TAAM[15.9949]MSSADSFSKHAHEMMLK	1	3	ENSRNOT00000049699,Q9WU70-2,Q9WU70-3
Pre-frontal cortex	Streptozocin	0	GAAVDEYFR	1	4	Q4AE70,Q4AE70-2,Q4AE70-3,Q4AE70-4
Pre-frontal cortex	Streptozocin	0	AGPDAAGIALYSHEDVCVFK	1	4	Q4AE70,Q4AE70-2,Q4AE70-3,Q4AE70-4
Pre-frontal cortex	Streptozocin	0	EVEELMEDTQHK	7	1	ENSRNOT00000022301
Pre-frontal cortex	Streptozocin	0	ILFCDVLR	2	2	ENSRNOT00000045493,P10688
Pre-frontal cortex	Streptozocin	0	YAVALAGPALELHNCVAK	4	1	ENSRNOT00000022938
Pre-frontal cortex	Streptozocin	0	FIEDTAAEK	5	1	ENSRNOT00000015851
Pre-frontal cortex	Streptozocin	0	TPVLLHDHNER	5	2	ENSRNOT00000015851,Q6PTT0
Pre-frontal cortex	Streptozocin	0	KVTQLDLDGPK	19	1	Q62785
Pre-frontal cortex	Streptozocin	0	AQESQQMIDFLNSVIVDLQR	20	1	ENSRNOT00000078530
Pre-frontal cortex	Streptozocin	0	LQSELDTLK	3	3	ENSRNOT00000088002,ENSRNOT00000001685,ENSRNOT00000078530
Pre-frontal cortex	Streptozocin	0	VQAEDEANGLQTAH	1	4	ENSRNOT00000088002,ENSRNOT00000083261,ENSRNOT00000001685,ENSRNOT00000078530
Pre-frontal cortex	Streptozocin	0	TQMLDQEELLASTR	8	1	ENSRNOT00000023861
Pre-frontal cortex	Streptozocin	0	GAFCDLVWSDPEDVDTWAISPR	3	1	ENSRNOT00000021176
Pre-frontal cortex	Streptozocin	0	YLPENDLKR	3	1	ENSRNOT00000021176
Pre-frontal cortex	Streptozocin	0	VMQEEIFGPILPIVSVK	5	3	ENSRNOT00000066109,ENSRNOT00000077461,P30839
Pre-frontal cortex	Streptozocin	0	LGLVGWVQNTNR	17	1	ENSRNOT00000080009
Pre-frontal cortex	Streptozocin	0	FVDVAQSTYDYGR	11	1	ENSRNOT00000016837
Pre-frontal cortex	Streptozocin	0	MYFLPDR	1	7	ENSRNOT00000083915,ENSRNOT00000015453,ENSRNOT00000091865,ENSRNOT00000086967,ENSRNOT00000079684,Q9JIR4,Q9JIR4-2
Pre-frontal cortex	Streptozocin	0	GAEPSQQALGPEQK	1	7	ENSRNOT00000083915,ENSRNOT00000015453,ENSRNOT00000091865,ENSRNOT00000086967,ENSRNOT00000079684,Q9JIR4,Q9JIR4-2
Pre-frontal cortex	Streptozocin	0	EEDQATEILQR	6	2	ENSRNOT00000088270,Q07647
Pre-frontal cortex	Streptozocin	0	LLAQYFEYR	2	1	A6JUQ6
Pre-frontal cortex	Streptozocin	0	LELNENPDTLHQDIQEVR	20	1	A6JUQ6
Pre-frontal cortex	Streptozocin	0	SQSVVDPTALK	1	1	A6JUQ6
Pre-frontal cortex	Streptozocin	0	SIVSTLESFK	12	1	Q5XIK7
Pre-frontal cortex	Streptozocin	0	KNM[15.9949]QDGASDGEIPK	1	1	Q5XIK7
Pre-frontal cortex	Streptozocin	0	IALENYLAALQSDPPRPHR	4	6	ENSRNOT00000070818,ENSRNOT00000074457,P15943,P15943-2,P15943-3,P15943-4
Pre-frontal cortex	Streptozocin	0	YLYLTPQDYK	1	4	ENSRNOT00000088138,ENSRNOT00000041140,P11497,P11497-2
Pre-frontal cortex	Streptozocin	0	YVLKVTRQSPNSYVVIMNGSCVEV	1	4	ENSRNOT00000088138,ENSRNOT00000041140,P11497,P11497-2
Pre-frontal cortex	Streptozocin	0	LNQQPSQGLGPR	12	2	ENSRNOT00000083617,Q6MG06
Pre-frontal cortex	Streptozocin	0	REEQTDTSDGESVTHHIR	2	2	ENSRNOT00000083617,Q6MG06
Pre-frontal cortex	Streptozocin	0	IIIAEVVNK	5	3	ENSRNOT00000068433,Q05096-2,Q05096-3
Pre-frontal cortex	Streptozocin	0	VLQYYQECEKPEDLGSANVQK	5	2	ENSRNOT00000079709,ENSRNOT00000087604
Pre-frontal cortex	Streptozocin	0	SMVQFIGR	1	2	ENSRNOT00000079709,ENSRNOT00000087604
Pre-frontal cortex	Streptozocin	0	VINYEEFK	2	1	ENSRNOT00000022863
Pre-frontal cortex	Streptozocin	0	NIDDGTSDRPYSHALVAGIDR	25	1	ENSRNOT00000028060
Pre-frontal cortex	Streptozocin	0	DLVDYITTHYK	6	1	ENSRNOT00000017018
Pre-frontal cortex	Streptozocin	0	LCTAVSESEVAR	6	1	ENSRNOT00000017018
Pre-frontal cortex	Streptozocin	0	FKLPVWETIVR	4	1	Q5FWY5
Pre-frontal cortex	Streptozocin	0	QQLNNMSFAEIIMGYK	1	1	ENSRNOT00000026760
Pre-frontal cortex	Streptozocin	0	IGWGQIR	1	2	C9WPN6,P81795
Pre-frontal cortex	Streptozocin	0	HTQWGIDILEK	6	9	ENSRNOT00000042798,ENSRNOT00000011224,Q8R511,Q8R511-2,Q8R511-3,Q8R511-4,Q8R511-5,Q8R511-6,Q8R511-7
Pre-frontal cortex	Streptozocin	0	VEQATKPSFESGR	10	4	ENSRNOT00000081688,Q4V898,D4AE41,P84586
Pre-frontal cortex	Streptozocin	0	SDLYSSGR	1	2	Q4V898,P84586
Pre-frontal cortex	Streptozocin	0	LSFEDFVTMTASR	6	1	ENSRNOT00000018742
Pre-frontal cortex	Streptozocin	0	SAIPAMQLDCFIK	3	1	ENSRNOT00000018742
Pre-frontal cortex	Streptozocin	0	VCTQLQVLTEAFR	1	1	ENSRNOT00000018742
Pre-frontal cortex	Streptozocin	0	ASMQQQQQLASAR	12	3	ENSRNOT00000086605,ENSRNOT00000010455,Q498T2-2
Pre-frontal cortex	Streptozocin	0	AVCESFHLAK	2	1	ENSRNOT00000019262
Pre-frontal cortex	Streptozocin	0	ILDDVTIPLLLR	1	1	ENSRNOT00000031161
Pre-frontal cortex	Streptozocin	0	VADPWGGSYMMESLTNDVYEAALK	4	1	ENSRNOT00000075279
Pre-frontal cortex	Streptozocin	0	YTPVQQGPVGVSVTYGGDHIPK	1	1	ENSRNOT00000079889
Pre-frontal cortex	Streptozocin	0	MAVMAMVTR	2	1	ENSRNOT00000029444
Pre-frontal cortex	Streptozocin	0	LYLCVSSPTIK	5	6	ENSRNOT00000089460,ENSRNOT00000064832,ENSRNOT00000047387,ENSRNOT00000082653,ENSRNOT00000081878,ENSRNOT00000006727
Pre-frontal cortex	Streptozocin	0	SDLVEEFWMK	1	1	ENSRNOT00000082982
Pre-frontal cortex	Streptozocin	0	TVLSLLGAR	3	2	ENSRNOT00000043572,Q02974-2
Pre-frontal cortex	Streptozocin	0	GPAGPGPGPGSGAAPEAR	9	3	ENSRNOT00000019214,P97838,P97838-2
Pre-frontal cortex	Streptozocin	0	IGDFGMSR	7	6	ENSRNOT00000046849,ENSRNOT00000082611,ENSRNOT00000042145,Q03351-2,Q03351-3,Q03351-4
Pre-frontal cortex	Streptozocin	0	SLSELADPNPK	1	2	ENSRNOT00000026378,Q9ESQ7
Pre-frontal cortex	Streptozocin	0	SLQTDSSNTDTALATLEEALSEK	1	3	ENSRNOT00000020427,Q8K3M6,Q8K3M6-2
Pre-frontal cortex	Streptozocin	0	MTIIGVILSFR	15	4	ENSRNOT00000064851,ENSRNOT00000065753,ENSRNOT00000088956,P55161
Pre-frontal cortex	Streptozocin	0	QLEEDVK	1	1	ENSRNOT00000082665
Pre-frontal cortex	Streptozocin	0	LLSVLMDPK	1	2	ENSRNOT00000018843,ENSRNOT00000090882
Pre-frontal cortex	Streptozocin	0	VTIMPK	3	3	ENSRNOT00000039294,ENSRNOT00000050223,Q6LED0
Pre-frontal cortex	Streptozocin	0	SGMYPGVLGPSSQGGLPLEEVTLAEVLAAR	3	1	ENSRNOT00000017783
Pre-frontal cortex	Streptozocin	0	VGGEVVIECKPK	1	1	Q62845
Pre-frontal cortex	Streptozocin	0	VNGTTVSSPSTSLQR	2	4	ENSRNOT00000035692,ENSRNOT00000091467,ENSRNOT00000034372,ENSRNOT00000081061
Pre-frontal cortex	Streptozocin	0	GLIDVKPLGVIWGK	5	2	ENSRNOT00000006063,Q5FWT7
Pre-frontal cortex	Streptozocin	0	LDDFLELNHKYWER	1	2	ENSRNOT00000006063,Q5FWT7
Pre-frontal cortex	Streptozocin	0	LLDGYDNR	2	6	ENSRNOT00000093306,ENSRNOT00000085037,ENSRNOT00000004725,ENSRNOT00000064779,ENSRNOT00000003197,P23576
Pre-frontal cortex	Streptozocin	0	ALLFSNNSQELHPDPFQAEDPFK	19	1	ENSRNOT00000018960
Pre-frontal cortex	Streptozocin	0	VGASEAALFLK	14	1	ENSRNOT00000018960
Pre-frontal cortex	Streptozocin	0	IQTQMDVVNAFQSGGSIQGALR	4	4	P11505-1,P11505-2,P11505-4,P11505-5
Pre-frontal cortex	Streptozocin	0	AQDGAAMEMQPLK	9	6	P11505,P11505-1,P11505-2,P11505-4,P11505-5,P11505-6
Pre-frontal cortex	Streptozocin	0	TICLAFR	12	6	P11505,P11505-1,P11505-2,P11505-4,P11505-5,P11505-6
Pre-frontal cortex	Streptozocin	0	LMDGSEILSLLESAR	36	3	ENSRNOT00000022849,ENSRNOT00000088647,ENSRNOT00000022878
Pre-frontal cortex	Streptozocin	0	DYFGLTYR	4	4	ENSRNOT00000022849,ENSRNOT00000049426,ENSRNOT00000088647,ENSRNOT00000022878
Pre-frontal cortex	Streptozocin	0	SHFESSTVK	5	4	ENSRNOT00000022849,ENSRNOT00000049426,ENSRNOT00000088647,ENSRNOT00000022878
Pre-frontal cortex	Streptozocin	0	DDIVSGR	1	4	ENSRNOT00000022849,ENSRNOT00000049426,ENSRNOT00000088647,ENSRNOT00000022878
Pre-frontal cortex	Streptozocin	0	DVDATESAPADR	2	4	ENSRNOT00000022849,ENSRNOT00000049426,ENSRNOT00000088647,ENSRNOT00000022878
Pre-frontal cortex	Streptozocin	0	GAMGIMLVYDITNEK	4	3	ENSRNOT00000024286,ENSRNOT00000020748,ENSRNOT00000077789
Pre-frontal cortex	Streptozocin	0	NIEEHASADVEK	7	2	ENSRNOT00000020748,ENSRNOT00000077789
Pre-frontal cortex	Streptozocin	0	QASHAQLGDAYDQEIR	24	1	P12839
Pre-frontal cortex	Streptozocin	0	FVEEIIEETK	5	2	ENSRNOT00000018637,P12839
Pre-frontal cortex	Streptozocin	0	VEEHEETFEEK	12	2	ENSRNOT00000018637,P12839
Pre-frontal cortex	Streptozocin	0	VTFGLFGK	12	1	ENSRNOT00000022828
Pre-frontal cortex	Streptozocin	0	MQDQQEYYVTTPGAEVEDTQK	22	6	ENSRNOT00000084756,ENSRNOT00000080470,ENSRNOT00000089534,ENSRNOT00000055615,ENSRNOT00000080637,ENSRNOT00000037255
Pre-frontal cortex	Streptozocin	0	GLVHQAICNLNITLPIYAK	34	6	ENSRNOT00000084756,ENSRNOT00000080470,ENSRNOT00000089534,ENSRNOT00000055615,ENSRNOT00000080637,ENSRNOT00000037255
Pre-frontal cortex	Streptozocin	0	NSIEFFEEISDEASK	5	4	ENSRNOT00000080470,ENSRNOT00000089534,ENSRNOT00000055615,ENSRNOT00000037255
Pre-frontal cortex	Streptozocin	0	LIEVGPSGAQFLGPVIVEIPHFAALR	31	2	ENSRNOT00000089534,ENSRNOT00000037255
Pre-frontal cortex	Streptozocin	0	ELPITNDIADSSEK	15	4	ENSRNOT00000080470,ENSRNOT00000089534,ENSRNOT00000055615,ENSRNOT00000037255
Pre-frontal cortex	Streptozocin	0	PAVIHECAEEDDSENGEK	20	4	ENSRNOT00000080470,ENSRNOT00000089534,ENSRNOT00000055615,ENSRNOT00000037255
Pre-frontal cortex	Streptozocin	0	DSTGLVNYLTDDLNSYTGTHEK	16	4	ENSRNOT00000080470,ENSRNOT00000089534,ENSRNOT00000055615,ENSRNOT00000037255
Pre-frontal cortex	Streptozocin	0	QDSNLIGPEGGVLSSTVVSQVQAVFPEGALTK	24	6	ENSRNOT00000084756,ENSRNOT00000080470,ENSRNOT00000089534,ENSRNOT00000055615,ENSRNOT00000080637,ENSRNOT00000037255
Pre-frontal cortex	Streptozocin	0	EHFFDLYR	13	4	ENSRNOT00000080470,ENSRNOT00000089534,ENSRNOT00000055615,ENSRNOT00000037255
Pre-frontal cortex	Streptozocin	0	GHVGLVQELLGR	17	7	ENSRNOT00000084756,ENSRNOT00000080470,ENSRNOT00000089534,ENSRNOT00000055615,ENSRNOT00000080637,ENSRNOT00000037255,ENSRNOT00000074002
Pre-frontal cortex	Streptozocin	0	ETPQLEACDGHGCK	5	4	ENSRNOT00000080470,ENSRNOT00000089534,ENSRNOT00000055615,ENSRNOT00000037255
Pre-frontal cortex	Streptozocin	0	MNEEVKEDPGNPEEDKDCK	26	4	ENSRNOT00000080470,ENSRNOT00000089534,ENSRNOT00000055615,ENSRNOT00000037255
Pre-frontal cortex	Streptozocin	0	QELEDNDKYQQFR	11	4	ENSRNOT00000080470,ENSRNOT00000089534,ENSRNOT00000055615,ENSRNOT00000037255
Pre-frontal cortex	Streptozocin	0	DSLESSPVEPK	2	4	ENSRNOT00000080470,ENSRNOT00000089534,ENSRNOT00000055615,ENSRNOT00000037255
Pre-frontal cortex	Streptozocin	0	SVYSDRDDESPDSSPEEQK	1	4	ENSRNOT00000080470,ENSRNOT00000089534,ENSRNOT00000055615,ENSRNOT00000037255
Pre-frontal cortex	Streptozocin	0	SAMIDDTVVIPSHQVSALAK	3	6	ENSRNOT00000084756,ENSRNOT00000080470,ENSRNOT00000089534,ENSRNOT00000055615,ENSRNOT00000080637,ENSRNOT00000037255
Pre-frontal cortex	Streptozocin	0	HSQGINWYHWK	13	5	ENSRNOT00000003407,ENSRNOT00000080254,ENSRNOT00000076860,Q05546,Q05546-2
Pre-frontal cortex	Streptozocin	0	QNGQTDFFR	5	5	ENSRNOT00000003407,ENSRNOT00000080254,ENSRNOT00000076860,Q05546,Q05546-2
Pre-frontal cortex	Streptozocin	0	LTVSWSPPVAPFDYYR	6	2	ENSRNOT00000080254,ENSRNOT00000076860
Pre-frontal cortex	Streptozocin	0	ILNYSPR	1	4	ENSRNOT00000003407,ENSRNOT00000080254,ENSRNOT00000076860,Q05546
Pre-frontal cortex	Streptozocin	0	DEEEEMMEVLLDATKRHAVLM[15.9949]GL	1	4	ENSRNOT00000003407,ENSRNOT00000080254,ENSRNOT00000076860,Q05546
Pre-frontal cortex	Streptozocin	0	LGLDFPNLPYLIDGSHK	33	4	ENSRNOT00000081501,ENSRNOT00000025994,P08009,P08010
Pre-frontal cortex	Streptozocin	0	VILDCER	2	5	ENSRNOT00000077941,ENSRNOT00000083361,P19491,P19491-2,P19491-3
Pre-frontal cortex	Streptozocin	0	HFCPNVPIILVGNK	39	3	ENSRNOT00000071664,ENSRNOT00000085355,ENSRNOT00000017254
Pre-frontal cortex	Streptozocin	0	MQALTYLQR	1	2	ENSRNOT00000086041,ENSRNOT00000036156
Pre-frontal cortex	Streptozocin	0	VILHLKEDQTEYLEER	3	3	ENSRNOT00000026920,ENSRNOT00000086986,P82995
Pre-frontal cortex	Streptozocin	0	FPLEMQIYCFDADR	21	4	ENSRNOT00000008719,Q62656,Q62656-2,Q62656-3
Pre-frontal cortex	Streptozocin	0	GNEEDTGLNPGR	14	4	ENSRNOT00000008719,Q62656,Q62656-2,Q62656-3
Pre-frontal cortex	Streptozocin	0	MTFHWGK	12	4	ENSRNOT00000008719,Q62656,Q62656-2,Q62656-3
Pre-frontal cortex	Streptozocin	0	FDPDATQFIEFCK	3	5	ENSRNOT00000065126,ENSRNOT00000087242,ENSRNOT00000007069,P08104,P04775
Pre-frontal cortex	Streptozocin	0	VSYEPITTTLK	1	5	ENSRNOT00000065126,ENSRNOT00000016841,P08104,P04775,P15390
Pre-frontal cortex	Streptozocin	0	MDAEFGHDSGFEVR	1	3	ENSRNOT00000044081,ENSRNOT00000048854,P08592-2
Pre-frontal cortex	Streptozocin	0	LLDWIEGK	6	2	ENSRNOT00000000064,P97874
Pre-frontal cortex	Streptozocin	0	LCDFGSATTISHYPDYSWSAQK	4	2	ENSRNOT00000000064,P97874
Pre-frontal cortex	Streptozocin	0	KFFLSHPAYR	9	19	ENSRNOT00000067653,ENSRNOT00000066007,ENSRNOT00000010947,ENSRNOT00000065028,P39052-2,P39052-3,P39052-4,Q08877-2,Q08877-3,Q08877-4,Q08877-5,Q08877-6,Q08877-7,Q08877-9,Q08877-10,Q08877-11,Q08877-12,Q08877-13,Q08877-8
Pre-frontal cortex	Streptozocin	0	HEIEAETDR	1	13	ENSRNOT00000067653,Q08877-2,Q08877-3,Q08877-4,Q08877-5,Q08877-6,Q08877-7,Q08877-9,Q08877-10,Q08877-11,Q08877-12,Q08877-13,Q08877-8
Pre-frontal cortex	Streptozocin	0	KIEMVR	5	1	ENSRNOT00000084730
Pre-frontal cortex	Streptozocin	0	IHTYSSPTFCDHCGSLLYGLIHQGMK	10	5	ENSRNOT00000016418,ENSRNOT00000016442,ENSRNOT00000078705,P68403,P68403-2
Pre-frontal cortex	Streptozocin	0	DDSYRPIVDYIDTQFENYLQEELK	25	3	ENSRNOT00000065229,ENSRNOT00000083162,B0BNF1
Pre-frontal cortex	Streptozocin	0	ISNAEPEPR	5	4	ENSRNOT00000091236,ENSRNOT00000065229,ENSRNOT00000083162,B0BNF1
Pre-frontal cortex	Streptozocin	0	SFNILCVGETGIGK	1	6	ENSRNOT00000091236,ENSRNOT00000065229,ENSRNOT00000083162,ENSRNOT00000093601,ENSRNOT00000068460,B0BNF1
Pre-frontal cortex	Streptozocin	0	ELIINEILVMR	12	2	ENSRNOT00000089141,ENSRNOT00000049321
Pre-frontal cortex	Streptozocin	0	LSALFR	8	1	ENSRNOT00000049321
Pre-frontal cortex	Streptozocin	0	LGATWVVLGHSER	30	2	ENSRNOT00000091773,P48500
Pre-frontal cortex	Streptozocin	0	GATWVVLGHSER	9	2	ENSRNOT00000091773,P48500
Pre-frontal cortex	Streptozocin	0	GELICTLNAAKMPADTEVVCAPPTAYIDFAR	3	1	ENSRNOT00000091773
Pre-frontal cortex	Streptozocin	0	SVTSLMLGETMPSITK	1	2	ENSRNOT00000015545,Q02253
Pre-frontal cortex	Streptozocin	0	NDQWNWDNIR	9	3	ENSRNOT00000006403,ENSRNOT00000090816,Q62868
Pre-frontal cortex	Streptozocin	0	NIDNFLNR	12	3	ENSRNOT00000006403,ENSRNOT00000090816,Q62868
Pre-frontal cortex	Streptozocin	0	KPPAPDPFAR	1	3	ENSRNOT00000006403,ENSRNOT00000090816,Q62868
Pre-frontal cortex	Streptozocin	0	GDCVECMACSDNTVR	13	1	ENSRNOT00000025783
Pre-frontal cortex	Streptozocin	0	LFAPTLSQDDPYLSIYDPPVPDFTVM[15.9949]K	1	1	ENSRNOT00000025783
Pre-frontal cortex	Streptozocin	0	LHLQAPEHYPDANHKPEMAIALTPF	1	1	ENSRNOT00000025783
Pre-frontal cortex	Streptozocin	0	LLPGYYMNLNQNPR	20	6	ENSRNOT00000028609,ENSRNOT00000088364,ENSRNOT00000061159,ENSRNOT00000076537,ENSRNOT00000068645,Q5I6B8
Pre-frontal cortex	Streptozocin	0	GVDASGETTYK	3	3	ENSRNOT00000088364,ENSRNOT00000061159,Q5I6B8
Pre-frontal cortex	Streptozocin	0	IMDYSLLLGVHNIDQQER	22	3	ENSRNOT00000088364,ENSRNOT00000061159,Q5I6B8
Pre-frontal cortex	Streptozocin	0	GAIQLGIGYTVGNLSSKPER	21	3	ENSRNOT00000088364,ENSRNOT00000061159,Q5I6B8
Pre-frontal cortex	Streptozocin	0	CLNCPEPQCSSVATPGQVK	16	1	ENSRNOT00000075159
Pre-frontal cortex	Streptozocin	0	LTYHGVSPCK	9	1	ENSRNOT00000075159
Pre-frontal cortex	Streptozocin	0	EFGFLSR	3	2	ENSRNOT00000019047,Q8K3P7
Pre-frontal cortex	Streptozocin	0	VVPGYGH	2	2	ENSRNOT00000033726,Q8VHF5
Pre-frontal cortex	Streptozocin	0	CVELDCWK	7	2	ENSRNOT00000051184,P10687
Pre-frontal cortex	Streptozocin	0	RVETALEACSLPSSR	5	2	ENSRNOT00000051184,P10687
Pre-frontal cortex	Streptozocin	0	ILPVQAIR	10	2	ENSRNOT00000051184,P10687
Pre-frontal cortex	Streptozocin	0	LQQVLQMESH	2	2	ENSRNOT00000012376,P52296
Pre-frontal cortex	Streptozocin	0	CDEVMQLLLENLGNENVHR	14	2	ENSRNOT00000012376,P52296
Pre-frontal cortex	Streptozocin	0	TVSPDRLELEAAQK	18	2	ENSRNOT00000012376,P52296
Pre-frontal cortex	Streptozocin	0	DAAVMAFGSILEGPEPNQLKPLVIQAMPTLIELMK	28	2	ENSRNOT00000012376,P52296
Pre-frontal cortex	Streptozocin	0	LLETTDRPDGHQNNLR	26	2	ENSRNOT00000012376,P52296
Pre-frontal cortex	Streptozocin	0	VTGGQTTQVETSSESPFPAK	23	5	ENSRNOT00000043627,ENSRNOT00000092445,ENSRNOT00000092540,P15146,P15146-2
Pre-frontal cortex	Streptozocin	0	EDQKGEEQTIEALK	23	3	ENSRNOT00000043627,ENSRNOT00000092445,ENSRNOT00000092540
Pre-frontal cortex	Streptozocin	0	EEFVETCPGEHK	26	5	ENSRNOT00000043627,ENSRNOT00000092445,ENSRNOT00000092540,P15146,P15146-2
Pre-frontal cortex	Streptozocin	0	EVTEVAPEVEIPSSAK	14	1	ENSRNOT00000092540
Pre-frontal cortex	Streptozocin	0	EESTETPDIPAIPSDVTQPQPEAVVSEPAEVR	33	5	ENSRNOT00000043627,ENSRNOT00000092445,ENSRNOT00000092540,P15146,P15146-2
Pre-frontal cortex	Streptozocin	0	SPQLATLAEDVTAALAK	6	7	ENSRNOT00000043627,ENSRNOT00000092445,ENSRNOT00000092540,P15146,P15146-2,P15146-3,P15146-4
Pre-frontal cortex	Streptozocin	0	DDLTLSR	1	5	ENSRNOT00000043627,ENSRNOT00000092445,ENSRNOT00000092540,P15146,P15146-2
Pre-frontal cortex	Streptozocin	0	GEEQTIEALKQDSFPISLEQAVTDAAMATK	3	3	ENSRNOT00000043627,ENSRNOT00000092445,ENSRNOT00000092540
Pre-frontal cortex	Streptozocin	0	TYATAEPFIDAK	12	5	ENSRNOT00000011292,ENSRNOT00000014250,P09951-2,Q63537,Q63537-2
Pre-frontal cortex	Streptozocin	0	DHIIEVVGS	10	2	ENSRNOT00000014250,P09951-2
Pre-frontal cortex	Streptozocin	0	MANLPNGYMTDLQR	7	2	ENSRNOT00000014250,P09951-2
Pre-frontal cortex	Streptozocin	0	KIHGEIDIK	13	2	ENSRNOT00000014250,P09951-2
Pre-frontal cortex	Streptozocin	0	GSHSQTPSPGALPLG	3	2	ENSRNOT00000014250,P09951-2
Pre-frontal cortex	Streptozocin	0	AGIPSVNSLHSVYNFCDKPWVFAQMVR	1	2	ENSRNOT00000014250,P09951-2
Pre-frontal cortex	Streptozocin	0	HIIEVVGSSMPLIGDHQDEDK	2	2	ENSRNOT00000014250,P09951-2
Pre-frontal cortex	Streptozocin	0	SFTYEDYR	1	1	ENSRNOT00000009120
Pre-frontal cortex	Streptozocin	0	TLPLEDSVFSDSAAISPEHR	1	2	ENSRNOT00000009802,Q9Z1T4-2
Pre-frontal cortex	Streptozocin	0	INMLTAGYAER	2	2	ENSRNOT00000009802,Q9Z1T4-2
Pre-frontal cortex	Streptozocin	0	ITHQELEDLGVSR	7	2	ENSRNOT00000009802,Q9Z1T4-2
Pre-frontal cortex	Streptozocin	0	TFAHLSELHCDK	11	5	ENSRNOT00000039946,ENSRNOT00000048484,ENSRNOT00000090422,P11517,P02091
Pre-frontal cortex	Streptozocin	0	KKDEELSSALEK	3	1	ENSRNOT00000018194
Pre-frontal cortex	Streptozocin	0	SSTFDAGAGIALNDNFVK	26	6	ENSRNOT00000043042,ENSRNOT00000050903,ENSRNOT00000022122,ENSRNOT00000039569,ENSRNOT00000030148,P04797
Pre-frontal cortex	Streptozocin	0	CADYVVTGAWSAK	15	1	ENSRNOT00000018763
Pre-frontal cortex	Streptozocin	0	GLGISVLEMSHR	26	1	ENSRNOT00000018763
Pre-frontal cortex	Streptozocin	0	QLLDYK	6	1	ENSRNOT00000018763
Pre-frontal cortex	Streptozocin	0	SAVPLNLIGLK	17	1	ENSRNOT00000018763
Pre-frontal cortex	Streptozocin	0	DNTIEHLLPLFLAQLK	38	1	ENSRNOT00000015019
Pre-frontal cortex	Streptozocin	0	TIEHLLPLFLAQLK	6	2	ENSRNOT00000015019,ENSRNOT00000064290
Pre-frontal cortex	Streptozocin	0	AHSSMVGVNLPQK	23	3	ENSRNOT00000036860,ENSRNOT00000085653,ENSRNOT00000077604
Pre-frontal cortex	Streptozocin	0	AGGFLMK	9	3	ENSRNOT00000036860,ENSRNOT00000085653,ENSRNOT00000077604
Pre-frontal cortex	Streptozocin	0	IQLINNM[15.9949]LDK	1	3	ENSRNOT00000036860,ENSRNOT00000085653,ENSRNOT00000077604
Pre-frontal cortex	Streptozocin	0	SSSSVHLMEPQTTVVHNATDGIK	10	1	ENSRNOT00000066163
Pre-frontal cortex	Streptozocin	0	GAILTTMLVSR	13	3	ENSRNOT00000066163,P11730-2,P11730-3
Pre-frontal cortex	Streptozocin	0	LHDSISEEGFHYLVFDLVTGGELFEDIVAR	2	14	ENSRNOT00000066163,ENSRNOT00000081607,ENSRNOT00000067162,ENSRNOT00000085265,P15791,P15791-2,P15791-3,P15791-4,P15791-5,P15791-6,P15791-7,P08413,P11730-2,P11730-3
Pre-frontal cortex	Streptozocin	0	HPWVCQR	4	7	ENSRNOT00000066163,ENSRNOT00000081607,ENSRNOT00000067162,ENSRNOT00000085265,P08413,P11730-2,P11730-3
Pre-frontal cortex	Streptozocin	0	ILLVGYPPFWDEDQHR	1	10	ENSRNOT00000041533,ENSRNOT00000080177,P15791,P15791-2,P15791-3,P15791-4,P15791-5,P15791-6,P15791-7,P11275
Pre-frontal cortex	Streptozocin	0	LTQYMDGNGMPK	6	7	P15791,P15791-2,P15791-3,P15791-4,P15791-5,P15791-6,P15791-7
Pre-frontal cortex	Streptozocin	0	IHIMPSLNPDGFEK	27	2	ENSRNOT00000064297,P15087
Pre-frontal cortex	Streptozocin	0	LLADQGQSWK	7	4	ENSRNOT00000092063,ENSRNOT00000066691,ENSRNOT00000085439,ENSRNOT00000024601
Pre-frontal cortex	Streptozocin	0	AACFLDSMATLGLAAYGYGIR	26	5	ENSRNOT00000010157,ENSRNOT00000028636,P53534,P09812,P09811
Pre-frontal cortex	Streptozocin	0	KVDWLTEK	2	4	ENSRNOT00000073140,ENSRNOT00000049048,ENSRNOT00000002484,ENSRNOT00000089294
Pre-frontal cortex	Streptozocin	0	GIYAYGFEK	16	4	ENSRNOT00000073140,ENSRNOT00000049048,ENSRNOT00000002484,ENSRNOT00000089294
Pre-frontal cortex	Streptozocin	0	FYINVER	6	4	ENSRNOT00000071997,ENSRNOT00000049048,ENSRNOT00000002484,ENSRNOT00000089294
Pre-frontal cortex	Streptozocin	0	AAASTDYYK	10	4	ENSRNOT00000088802,ENSRNOT00000038352,ENSRNOT00000019797,P26284
Pre-frontal cortex	Streptozocin	0	ANDATFEIK	10	4	ENSRNOT00000088802,ENSRNOT00000038352,ENSRNOT00000019797,P26284
Pre-frontal cortex	Streptozocin	0	PILMELQTYR	2	4	ENSRNOT00000088802,ENSRNOT00000038352,ENSRNOT00000019797,P26284
Pre-frontal cortex	Streptozocin	0	KEIEDAAQFATADPEPPLEELGYHIY	17	4	ENSRNOT00000088802,ENSRNOT00000038352,ENSRNOT00000019797,P26284
Pre-frontal cortex	Streptozocin	0	TITSEDVAEMHNILK	12	1	Q9R0I8
Pre-frontal cortex	Streptozocin	0	QANCPLYITK	13	2	ENSRNOT00000029587,Q62951
Pre-frontal cortex	Streptozocin	0	KTFPDFVYK	1	2	ENSRNOT00000029587,Q62951
Pre-frontal cortex	Streptozocin	0	TFPDFVYK	9	2	ENSRNOT00000029587,Q62951
Pre-frontal cortex	Streptozocin	0	FPDFVYK	2	3	ENSRNOT00000029587,ENSRNOT00000012996,Q62951
Pre-frontal cortex	Streptozocin	0	YAPLHLVPLIER	28	4	ENSRNOT00000088459,ENSRNOT00000016376,ENSRNOT00000081280,ENSRNOT00000059496
Pre-frontal cortex	Streptozocin	0	FLELTMGR	1	3	ENSRNOT00000088459,ENSRNOT00000016376,ENSRNOT00000081280
Pre-frontal cortex	Streptozocin	0	KNVLISVLQAIR	1	1	ENSRNOT00000081280
Pre-frontal cortex	Streptozocin	0	LENLLPDTQYFIEVGACNSAGCGPSSDVIETFTR	14	1	Q63198
Pre-frontal cortex	Streptozocin	0	TDPPIIEGNMESAK	16	1	Q63198
Pre-frontal cortex	Streptozocin	0	TQTQMDLEQR	3	2	ENSRNOT00000048528,ENSRNOT00000091084
Pre-frontal cortex	Streptozocin	0	GDNVYEFHLEFLDLVKPEPAYR	12	1	ENSRNOT00000041915
Pre-frontal cortex	Streptozocin	0	FSFTLPYPLR	11	1	ENSRNOT00000041915
Pre-frontal cortex	Streptozocin	0	GACLTLTDHDR	2	1	ENSRNOT00000021263
Pre-frontal cortex	Streptozocin	0	SDGGYTYDTSDLAAIK	15	1	P40329
Pre-frontal cortex	Streptozocin	0	EGEDLIQQLR	2	11	ENSRNOT00000016784,ENSRNOT00000049292,P97924,P97924-2,P97924-3,P97924-4,P97924-5,P97924-6,P97924-7,P97924-8,F1M0Z1
Pre-frontal cortex	Streptozocin	0	AQQYLDMCWK	1	4	ENSRNOT00000019244,ENSRNOT00000055669,Q2HWF0-2,Q2HWF0-3
Pre-frontal cortex	Streptozocin	0	HSSDINHLVTQGR	1	4	ENSRNOT00000019244,ENSRNOT00000055669,Q2HWF0-2,Q2HWF0-3
Pre-frontal cortex	Streptozocin	0	VLPMNTGVEAGETACK	16	1	P04182
Pre-frontal cortex	Streptozocin	0	IFVMATHGLLSSDAPR	12	1	ENSRNOT00000003697
Pre-frontal cortex	Streptozocin	0	AGLTHLITMDLHQK	19	3	ENSRNOT00000003697,ENSRNOT00000013573,Q63468
Pre-frontal cortex	Streptozocin	0	LGVEMGK	3	1	ENSRNOT00000003697
Pre-frontal cortex	Streptozocin	0	EACWTISNITAGNR	10	3	ENSRNOT00000046268,Q56R16,P83953
Pre-frontal cortex	Streptozocin	0	AVWALSNLCR	3	3	ENSRNOT00000046268,Q56R16,P83953
Pre-frontal cortex	Streptozocin	0	SLNPDEMR	1	1	P83953
Pre-frontal cortex	Streptozocin	0	LKEEESFNIQNSMSPK	1	3	ENSRNOT00000028278,Q9ERQ6,Q9ERQ6-2
Pre-frontal cortex	Streptozocin	0	TLTPSILAELQLR	7	1	ENSRNOT00000037333
Pre-frontal cortex	Streptozocin	0	SSPADLVTVTDQK	10	2	ENSRNOT00000014274,P97697
Pre-frontal cortex	Streptozocin	0	PQVVVAPVLMSK	4	2	ENSRNOT00000081157,ENSRNOT00000091387
Pre-frontal cortex	Streptozocin	0	DLQNVNITLR	3	3	ENSRNOT00000083521,ENSRNOT00000075733,ENSRNOT00000008661
Pre-frontal cortex	Streptozocin	0	GFEDGIVR	6	1	ENSRNOT00000024884
Pre-frontal cortex	Streptozocin	0	TQEILSQLPF	2	2	ENSRNOT00000016372,ENSRNOT00000074473
Pre-frontal cortex	Streptozocin	0	GFGFIR	4	4	ENSRNOT00000028219,ENSRNOT00000088037,ENSRNOT00000076913,ENSRNOT00000004911
Pre-frontal cortex	Streptozocin	0	FGQAATMEGIGAIGGTPPAFNRPAPGAEFAPNK	1	1	ENSRNOT00000004911
Pre-frontal cortex	Streptozocin	0	LEQELFSGGNTGINFEK	5	2	ENSRNOT00000092078,ENSRNOT00000091448
Pre-frontal cortex	Streptozocin	0	DLMACAQTGSGK	5	4	ENSRNOT00000092078,ENSRNOT00000013035,ENSRNOT00000091448,Q64060
Pre-frontal cortex	Streptozocin	0	IGLDFCK	13	2	ENSRNOT00000092078,ENSRNOT00000091448
Pre-frontal cortex	Streptozocin	0	LLTDSDLK	1	2	ENSRNOT00000029332,ENSRNOT00000089973
Pre-frontal cortex	Streptozocin	0	TNICVTR	2	1	P15650
Pre-frontal cortex	Streptozocin	0	PQFLLQFSDVLTR	3	2	ENSRNOT00000002576,ENSRNOT00000082855
Pre-frontal cortex	Streptozocin	0	VMLDELAMETLQEK	8	2	ENSRNOT00000012646,Q9JHZ4-2
Pre-frontal cortex	Streptozocin	0	EGVPGAAGPHVDGELLR	7	2	ENSRNOT00000012646,Q9JHZ4-2
Pre-frontal cortex	Streptozocin	0	KLQNM[15.9949]LEEQLTK	1	2	ENSRNOT00000012646,Q9JHZ4-2
Pre-frontal cortex	Streptozocin	0	GVLEEAIIATILK	6	2	ENSRNOT00000037133,ENSRNOT00000087122
Pre-frontal cortex	Streptozocin	0	VTSAAFPSPIEK	14	5	ENSRNOT00000066209,ENSRNOT00000082921,ENSRNOT00000084892,ENSRNOT00000040702,P20759
Pre-frontal cortex	Streptozocin	0	VTVEDLFSEDFK	13	3	ENSRNOT00000045773,P46101,P46101-2
Pre-frontal cortex	Streptozocin	0	DHQYQFLEDAVR	17	1	ENSRNOT00000029996
Pre-frontal cortex	Streptozocin	0	TELLTEALR	5	1	ENSRNOT00000015344
Pre-frontal cortex	Streptozocin	0	QLVLETLYALASNTK	1	1	ENSRNOT00000015344
Pre-frontal cortex	Streptozocin	0	YNFFTGCPK	1	2	ENSRNOT00000021030,ENSRNOT00000087591
Pre-frontal cortex	Streptozocin	0	ALIPDVLGR	11	2	ENSRNOT00000021030,ENSRNOT00000087591
Pre-frontal cortex	Streptozocin	0	LDPGKPESILK	13	1	ENSRNOT00000055583
Pre-frontal cortex	Streptozocin	0	TSAFLLWDPSK	11	1	ENSRNOT00000031026
Pre-frontal cortex	Streptozocin	0	CLTTHEYDGQK	2	1	ENSRNOT00000031026
Pre-frontal cortex	Streptozocin	0	GFCFITFK	12	4	ENSRNOT00000047840,Q9JJ54-2,Q9JJ54-3,Q9JJ54-4
Pre-frontal cortex	Streptozocin	0	LALPGFSTPR	12	5	ENSRNOT00000079981,ENSRNOT00000079524,Q1AAU6,Q1AAU6-2,Q1AAU6-3
Pre-frontal cortex	Streptozocin	0	VGGLYVPSR	1	3	ENSRNOT00000079524,Q1AAU6,Q1AAU6-2
Pre-frontal cortex	Streptozocin	0	YVDIAIPCNNK	13	1	ENSRNOT00000025225
Pre-frontal cortex	Streptozocin	0	KSDGIYIINLK	14	1	ENSRNOT00000025225
Pre-frontal cortex	Streptozocin	0	SLNLLVSHFMENER	30	2	ENSRNOT00000022485,Q5BKC9
Pre-frontal cortex	Streptozocin	0	LIILASGGPQALVNIMR	9	2	ENSRNOT00000079085,Q9WU82
Pre-frontal cortex	Streptozocin	0	LHYGLPVVVK	22	2	ENSRNOT00000079085,Q9WU82
Pre-frontal cortex	Streptozocin	0	KLEEEGEEFVK	16	4	ENSRNOT00000015420,ENSRNOT00000088049,P11915,P11915-2
Pre-frontal cortex	Streptozocin	0	IGGIFAFK	12	5	ENSRNOT00000015420,ENSRNOT00000088049,ENSRNOT00000015466,P11915,P11915-2
Pre-frontal cortex	Streptozocin	0	EHHLSEVQNMASEEK	44	1	Q68FX0
Pre-frontal cortex	Streptozocin	0	LEQVLSSMK	3	1	Q68FX0
Pre-frontal cortex	Streptozocin	0	YTLDVYR	1	2	ENSRNOT00000010674,Q4KM49
Pre-frontal cortex	Streptozocin	0	IFTFAEK	1	2	ENSRNOT00000010674,Q4KM49
Pre-frontal cortex	Streptozocin	0	SALTLQFMYDEFVEDYEPTK	22	3	ENSRNOT00000018190,ENSRNOT00000003413,P36860
Pre-frontal cortex	Streptozocin	0	ESLWPFLIDK	7	2	ENSRNOT00000082076,ENSRNOT00000004269
Pre-frontal cortex	Streptozocin	0	GTFHWSGNEQMTK	7	2	ENSRNOT00000082076,ENSRNOT00000004269
Pre-frontal cortex	Streptozocin	0	VAVVIDPTR	15	1	ENSRNOT00000008877
Pre-frontal cortex	Streptozocin	0	TVQCLCVVK	1	3	ENSRNOT00000028544,ENSRNOT00000044532,P07722-2
Pre-frontal cortex	Streptozocin	0	MFAPTK	4	2	ENSRNOT00000013461,P50878
Pre-frontal cortex	Streptozocin	0	HDIETPYGLLHVVIR	4	9	ENSRNOT00000051414,ENSRNOT00000017494,ENSRNOT00000017413,Q9Z2L9,Q9Z2L9-2,Q9Z2L9-3,Q9Z2L9-4,Q9Z2L9-5,Q9Z2L9-6
Pre-frontal cortex	Streptozocin	0	GWIDWAATK	9	9	ENSRNOT00000051414,ENSRNOT00000017494,ENSRNOT00000017413,Q9Z2L9,Q9Z2L9-2,Q9Z2L9-3,Q9Z2L9-4,Q9Z2L9-5,Q9Z2L9-6
Pre-frontal cortex	Streptozocin	0	LDINRPGTVPNAK	2	9	ENSRNOT00000051414,ENSRNOT00000017494,ENSRNOT00000017413,Q9Z2L9,Q9Z2L9-2,Q9Z2L9-3,Q9Z2L9-4,Q9Z2L9-5,Q9Z2L9-6
Pre-frontal cortex	Streptozocin	0	DGELPVEDDIDLSDVELDDLEKDEL	3	2	ENSRNOT00000074829,Q63081
Pre-frontal cortex	Streptozocin	0	QICVVMLESPPK	15	1	ENSRNOT00000001675
Pre-frontal cortex	Streptozocin	0	VSTVTTHSSDSEVPSR	13	2	ENSRNOT00000022095,P05371
Pre-frontal cortex	Streptozocin	0	TVCKEIRHNSTGCLK	1	3	ENSRNOT00000091612,ENSRNOT00000022095,P05371
Pre-frontal cortex	Streptozocin	0	AVETPPMSSVNLLEGLSR	1	1	ENSRNOT00000066961
Pre-frontal cortex	Streptozocin	0	FNLMQVGR	7	1	ENSRNOT00000066961
Pre-frontal cortex	Streptozocin	0	DQVLHEHIQR	5	1	ENSRNOT00000066961
Pre-frontal cortex	Streptozocin	0	SVDGQWVCISDVNK	3	1	ENSRNOT00000014377
Pre-frontal cortex	Streptozocin	0	YQSSQGDMGVSQSR	3	2	ENSRNOT00000077280,ENSRNOT00000081937
Pre-frontal cortex	Streptozocin	0	NLETVLSQSVQSIPLYLMPR	4	2	ENSRNOT00000077280,ENSRNOT00000081937
Pre-frontal cortex	Streptozocin	0	TNLIVNYLPQNMTQEELR	10	1	ENSRNOT00000001415
Pre-frontal cortex	Streptozocin	0	FATLIIDILSEAK	8	2	ENSRNOT00000078730,Q9Z272
Pre-frontal cortex	Streptozocin	0	SIWEHSLLDPAQVQSGR	4	2	ENSRNOT00000078730,Q9Z272
Pre-frontal cortex	Streptozocin	0	IDLGVHVDGFIANVAHTFVIGVAQGSQVTGR	3	3	ENSRNOT00000081125,ENSRNOT00000006578,Q6AYD3-2
Pre-frontal cortex	Streptozocin	0	AKDAGQRTTIYK	1	2	ENSRNOT00000006578,Q6AYD3-2
Pre-frontal cortex	Streptozocin	0	VDVEALENSPGATYIR	12	2	ENSRNOT00000002862,ENSRNOT00000066382
Pre-frontal cortex	Streptozocin	0	VEGLQAQALYPWR	6	3	ENSRNOT00000042750,Q9WVE9-1,Q9WVE9-2
Pre-frontal cortex	Streptozocin	0	LPTDPSGDEPIFHISHIDR	2	1	ENSRNOT00000042750
Pre-frontal cortex	Streptozocin	0	DLEQEVLCITVFER	2	1	ENSRNOT00000042750
Pre-frontal cortex	Streptozocin	0	LLQAEFFEIPMNFVDPK	2	2	ENSRNOT00000018860,P35234
Pre-frontal cortex	Streptozocin	0	GSVSATPVQGSVPEGK	6	1	ENSRNOT00000077711
Pre-frontal cortex	Streptozocin	0	NAAQVLVGIPLETGQK	19	1	ENSRNOT00000003046
Pre-frontal cortex	Streptozocin	0	GNQLQEFAAMLMPH	1	1	ENSRNOT00000003046
Pre-frontal cortex	Streptozocin	0	DPSYFVFLYLTK	3	4	ENSRNOT00000009660,ENSRNOT00000082353,ENSRNOT00000061826,Q5HZA6-2
Pre-frontal cortex	Streptozocin	0	FLYDELGLDSTDAFEALKK	14	4	ENSRNOT00000009660,ENSRNOT00000082353,ENSRNOT00000061826,Q5HZA6-2
Pre-frontal cortex	Streptozocin	0	VYWDLAGLNLIK	10	2	ENSRNOT00000021711,Q8R4E1
Pre-frontal cortex	Streptozocin	0	LATTALYFTYSALEEEMDR	1	1	ENSRNOT00000005031
Pre-frontal cortex	Streptozocin	0	SGEKPLLGGSLMEYAILSAIAAMNEPK	29	1	Q6P747
Pre-frontal cortex	Streptozocin	0	GQLEQITGK	1	1	Q6P747
Pre-frontal cortex	Streptozocin	0	EIDESVLGHTGTYR	4	2	ENSRNOT00000001409,O35094
Pre-frontal cortex	Streptozocin	0	ITEIIR	2	4	ENSRNOT00000001409,ENSRNOT00000019685,O35094,B1H267
Pre-frontal cortex	Streptozocin	0	ICGGLAMYECR	2	4	ENSRNOT00000091626,ENSRNOT00000011720,ENSRNOT00000018888,Q66H62
Pre-frontal cortex	Streptozocin	0	VEAASGFTSEEKDPEEFLNILFHDILR	9	3	ENSRNOT00000011720,ENSRNOT00000018888,Q66H62
Pre-frontal cortex	Streptozocin	0	TVSGIFFGVELLEEGR	1	3	ENSRNOT00000011720,ENSRNOT00000018888,Q66H62
Pre-frontal cortex	Streptozocin	0	LGWVRPDLGELSK	4	2	ENSRNOT00000044885,ENSRNOT00000084069
Pre-frontal cortex	Streptozocin	0	AEVIMNYHVGETVLSLQK	1	1	ENSRNOT00000023854
Pre-frontal cortex	Streptozocin	0	VLNEECDQNWYK	16	3	ENSRNOT00000005347,P62994-2,P62994-3
Pre-frontal cortex	Streptozocin	0	FTAVEDQYYCVDCYK	2	2	ENSRNOT00000083502,ENSRNOT00000043820
Pre-frontal cortex	Streptozocin	0	SNSVEKPVSSLLSR	1	3	ENSRNOT00000080230,ENSRNOT00000019583,O08719-2
Pre-frontal cortex	Streptozocin	0	ASVMVYDDTSK	1	3	ENSRNOT00000080230,ENSRNOT00000019583,O08719-2
Pre-frontal cortex	Streptozocin	0	QVATALQNLQTK	11	3	ENSRNOT00000015179,ENSRNOT00000085126,P85972
Pre-frontal cortex	Streptozocin	0	SFLDSGYR	4	3	ENSRNOT00000015179,ENSRNOT00000085126,P85972
Pre-frontal cortex	Streptozocin	0	DFANTIPGHGGIMDR	1	3	ENSRNOT00000002918,ENSRNOT00000028888,Q91XU8
Pre-frontal cortex	Streptozocin	0	IQNAGGSVMIQR	12	7	ENSRNOT00000079279,ENSRNOT00000040509,ENSRNOT00000008238,ENSRNOT00000083470,P35815,P35815-2,P20650
Pre-frontal cortex	Streptozocin	0	SGFALEPSVENVK	8	5	ENSRNOT00000079279,ENSRNOT00000040509,ENSRNOT00000083470,P35815,P35815-2
Pre-frontal cortex	Streptozocin	0	FEELFPDWIFPSESER	20	5	ENSRNOT00000004010,ENSRNOT00000003987,ENSRNOT00000083688,P49186,P49186-2
Pre-frontal cortex	Streptozocin	0	LDHYAIIK	1	1	ENSRNOT00000035657
Pre-frontal cortex	Streptozocin	0	QFNDHLMPLISSSPK	1	1	ENSRNOT00000067735
Pre-frontal cortex	Streptozocin	0	VPVIVEK	10	3	ENSRNOT00000077356,ENSRNOT00000023724,ENSRNOT00000048998
Pre-frontal cortex	Streptozocin	0	HFTILDAPGHK	17	1	ENSRNOT00000071762
Pre-frontal cortex	Streptozocin	0	QSVHLVENEIQASIDQIFSHLER	8	1	ENSRNOT00000005046
Pre-frontal cortex	Streptozocin	0	IFQMDEGLSHITPR	2	2	ENSRNOT00000083046,ENSRNOT00000085609
Pre-frontal cortex	Streptozocin	0	EVHVLCLGLDNSGK	5	1	ENSRNOT00000002293
Pre-frontal cortex	Streptozocin	0	VASSPAPPEGPSHPR	1	3	ENSRNOT00000057036,E9PSL7-2,E9PSL7-3
Pre-frontal cortex	Streptozocin	0	IGPTELLIEMEDWK	6	2	ENSRNOT00000009813,P14480-2
Pre-frontal cortex	Streptozocin	0	MVPAAVSHSEFWHR	2	1	ENSRNOT00000011054
Pre-frontal cortex	Streptozocin	0	YALTTTLSAR	4	1	ENSRNOT00000017942
Pre-frontal cortex	Streptozocin	0	ELEQFTQVSK	2	1	ENSRNOT00000019624
Pre-frontal cortex	Streptozocin	0	LDPTGCLTSLVLVASGR	7	3	ENSRNOT00000048318,ENSRNOT00000089575,P21139
Pre-frontal cortex	Streptozocin	0	EGEKTSYVLSER	1	3	ENSRNOT00000048318,ENSRNOT00000089575,P21139
Pre-frontal cortex	Streptozocin	0	LAFLNVQAAEEALPK	1	4	ENSRNOT00000044419,ENSRNOT00000088589,ENSRNOT00000090323,P35571
Pre-frontal cortex	Streptozocin	0	ANLLEIAPHLSAPLPIMLPLYK	13	4	ENSRNOT00000044419,ENSRNOT00000088589,ENSRNOT00000090323,P35571
Pre-frontal cortex	Streptozocin	0	YSGDNLIYKPPGR	4	1	ENSRNOT00000007711
Pre-frontal cortex	Streptozocin	0	SPVTFLSDLR	4	1	ENSRNOT00000016563
Pre-frontal cortex	Streptozocin	0	SADDSLSGVVR	2	2	ENSRNOT00000005366,Q8K4K5
Pre-frontal cortex	Streptozocin	0	LAASFQSMEVR	12	3	Q63487,Q63487-2,Q63486
Pre-frontal cortex	Streptozocin	0	SIIFANYIAR	1	3	Q63487,Q63487-2,Q63486
Pre-frontal cortex	Streptozocin	0	IDSLPPLIIGK	16	1	ENSRNOT00000049756
Pre-frontal cortex	Streptozocin	0	LVDEEPQLTK	2	4	ENSRNOT00000075906,ENSRNOT00000014718,ENSRNOT00000088301,ENSRNOT00000076418
Pre-frontal cortex	Streptozocin	0	PCGKIPPPVIM[15.9949]VQNASFK	3	1	ENSRNOT00000088301
Pre-frontal cortex	Streptozocin	0	DVEETGITVASLER	1	2	ENSRNOT00000091496,ENSRNOT00000007276
Pre-frontal cortex	Streptozocin	0	EVLDIAAGMIK	2	1	ENSRNOT00000017579
Pre-frontal cortex	Streptozocin	0	SFLESIDDALAEK	4	2	ENSRNOT00000092614,ENSRNOT00000067904
Pre-frontal cortex	Streptozocin	0	VISAEEALPGR	8	5	ENSRNOT00000016616,ENSRNOT00000072997,Q923M1,Q923M1-3,Q923M1-4
Pre-frontal cortex	Streptozocin	0	GSSAGFLTLHNAFPK	1	1	Q8VHW5
Pre-frontal cortex	Streptozocin	0	TVGVEPAADGK	4	2	ENSRNOT00000058943,ENSRNOT00000012255
Pre-frontal cortex	Streptozocin	0	LQWEIVANVLEDTVK	2	2	ENSRNOT00000083128,ENSRNOT00000006830
Pre-frontal cortex	Streptozocin	0	TQSTDDEYALDGK	1	2	ENSRNOT00000041373,ENSRNOT00000088378
Pre-frontal cortex	Streptozocin	0	AFNTLLPDLEEIEHLNWLEALK	1	2	ENSRNOT00000041373,ENSRNOT00000088378
Pre-frontal cortex	Streptozocin	0	KASMGM[15.9949]LR	1	2	ENSRNOT00000041373,ENSRNOT00000088378
Pre-frontal cortex	Streptozocin	0	ELMTEGEHIATEITAK	1	2	ENSRNOT00000041373,ENSRNOT00000088378
Pre-frontal cortex	Streptozocin	0	WSPHHNCTQVATASDTTLR	7	2	ENSRNOT00000060185,Q5PPK9
Pre-frontal cortex	Streptozocin	0	AVQTSIATAYR	2	2	ENSRNOT00000080834,Q5FVC7
Pre-frontal cortex	Streptozocin	0	AEYIPTIIR	1	8	ENSRNOT00000012129,ENSRNOT00000048353,ENSRNOT00000048137,ENSRNOT00000042100,Q9EPI6,Q9EPI6-2,Q9EPI6-3,Q9EPI6-4
Pre-frontal cortex	Streptozocin	0	LSYCGGGEALAIPFEPAR	1	1	Q642A4
Pre-frontal cortex	Streptozocin	0	LLEQAHAPWLWDAWGPDSPSDSSASPSPAPK	8	1	ENSRNOT00000023911
Pre-frontal cortex	Streptozocin	0	SPVPAGEEAGELGESR	2	2	ENSRNOT00000011155,ENSRNOT00000085132
Pre-frontal cortex	Streptozocin	0	LDETVAYEQK	1	1	ENSRNOT00000012645
Pre-frontal cortex	Streptozocin	0	IEALQADNDFTNER	2	4	ENSRNOT00000089377,ENSRNOT00000067464,ENSRNOT00000091513,P0C219
Pre-frontal cortex	Streptozocin	0	VGEGTQVLEMPFK	4	1	ENSRNOT00000003748
Pre-frontal cortex	Streptozocin	0	GLLEDLQGVPER	5	1	P58200
Pre-frontal cortex	Streptozocin	0	AEYTEASGPCVLTPHR	9	1	ENSRNOT00000000791
Pre-frontal cortex	Streptozocin	0	SFMQVLCEK	1	1	ENSRNOT00000059951
Pre-frontal cortex	Streptozocin	0	FSSALQPGTLLDLLQIEGMK	1	1	ENSRNOT00000080094
Pre-frontal cortex	Streptozocin	0	ALGMDTVHIHR	1	1	ENSRNOT00000016424
Pre-frontal cortex	Streptozocin	0	FPAEDEFPDLSSHNNHMAK	94	1	ENSRNOT00000015122
Pre-frontal cortex	Streptozocin	0	LGFSEVELVQMVVDGVK	232	1	ENSRNOT00000015122
Pre-frontal cortex	Streptozocin	0	CTPSGFTLDDAIQTGVDNPGHPYIMTVGAVAGDEESYDVFK	55	1	ENSRNOT00000015122
Pre-frontal cortex	Streptozocin	0	NYEFM[15.9949]WNPHLGYILTCPSNLGTGLR	31	1	ENSRNOT00000015122
Pre-frontal cortex	Streptozocin	0	DLFDPIIEDR	15	1	ENSRNOT00000015122
Pre-frontal cortex	Streptozocin	0	VISMQK	2	1	ENSRNOT00000015122
Pre-frontal cortex	Streptozocin	0	TGFDFNIMVVGQSGLGK	29	3	ENSRNOT00000010491,Q9WU34,Q9WU34-3
Pre-frontal cortex	Streptozocin	0	ELEVNGIEFYPQK	24	4	ENSRNOT00000010491,Q9WU34,Q9WU34-2,Q9WU34-3
Pre-frontal cortex	Streptozocin	0	VVNIVPVIAK	13	4	Q9QZR6,Q9QZR6-2,Q9QZR6-3,Q9QZR6-4
Pre-frontal cortex	Streptozocin	0	VIHDNFGIVEGLMTTVHTITATQK	2	1	ENSRNOT00000011090
Pre-frontal cortex	Streptozocin	0	EEIPEEELNEDVEEIDHAER	19	15	ENSRNOT00000043476,P11506,P11506-1,P11506-2,P11506-3,P11506-4,P11506-5,P11506-6,P11506-7,P11506-8,P11506-9,P11506-10,P11506-11,P11506-12,P11506-14
Pre-frontal cortex	Streptozocin	0	IEDSQPHIPLIDDTDLEEDAALK	20	6	P11506,P11506-1,P11506-6,P11506-7,P11506-8,P11506-14
Pre-frontal cortex	Streptozocin	0	NSKPVHTTILNPH	7	3	ENSRNOT00000041533,ENSRNOT00000080177,P11275
Pre-frontal cortex	Streptozocin	0	MLTINPSK	12	3	ENSRNOT00000041533,ENSRNOT00000080177,P11275
Pre-frontal cortex	Streptozocin	0	ICDPGLTSFEPEALGNLVEGM[15.9949]DFHR	2	4	ENSRNOT00000081607,ENSRNOT00000067162,ENSRNOT00000085265,P08413
Pre-frontal cortex	Streptozocin	0	LCTGHEYAAK	6	4	ENSRNOT00000081607,ENSRNOT00000067162,ENSRNOT00000085265,P08413
Pre-frontal cortex	Streptozocin	0	VVVDALSGLK	13	2	ENSRNOT00000089230,P25809
Pre-frontal cortex	Streptozocin	0	LSEMTEAEQQQLIDDHFLFDKPVSPLLTAAGMAR	47	2	ENSRNOT00000089230,P25809
Pre-frontal cortex	Streptozocin	0	LLLEYTDSSYEEK	16	4	ENSRNOT00000047139,ENSRNOT00000025994,P08009,P04905
Pre-frontal cortex	Streptozocin	0	FADSLGVPFLETSAK	5	2	ENSRNOT00000042711,P10536
Pre-frontal cortex	Streptozocin	0	PEYDYLFK	1	3	ENSRNOT00000042711,ENSRNOT00000084481,P10536
Pre-frontal cortex	Streptozocin	0	CVVTAEDGTQSEATVNVK	16	1	P13596
Pre-frontal cortex	Streptozocin	0	DKDISWFSPNGEK	9	1	P13596
Pre-frontal cortex	Streptozocin	0	CETNVAPNCGVDAR	14	2	ENSRNOT00000020959,P09216
Pre-frontal cortex	Streptozocin	0	ASSSTDGQLASPGENGEVR	9	2	ENSRNOT00000020959,P09216
Pre-frontal cortex	Streptozocin	0	AEFWLDLQPQAK	5	4	ENSRNOT00000067639,ENSRNOT00000025858,P09215,P09215-2
Pre-frontal cortex	Streptozocin	0	SYGIPFIETSAK	14	3	ENSRNOT00000039572,P08644,P08644-2
Pre-frontal cortex	Streptozocin	0	SFEDIHHYR	11	2	P08644,P08644-2
Pre-frontal cortex	Streptozocin	0	VAELEEEQSQGSSSYSDWVK	13	3	ENSRNOT00000083005,ENSRNOT00000019320,P34926
Pre-frontal cortex	Streptozocin	0	SPESLSSPAMEDLAVEWEGK	29	3	ENSRNOT00000083005,ENSRNOT00000019320,P34926
Pre-frontal cortex	Streptozocin	0	ITLQQDAYWR	6	3	ENSRNOT00000083005,ENSRNOT00000019320,P34926
Pre-frontal cortex	Streptozocin	0	QDVVQGWR	6	3	ENSRNOT00000083005,ENSRNOT00000019320,P34926
Pre-frontal cortex	Streptozocin	0	DTDLQQTQATEPR	11	3	ENSRNOT00000083005,ENSRNOT00000019320,P34926
Pre-frontal cortex	Streptozocin	0	EAEISVPYLTSITALVVWLPANPTEK	45	3	ENSRNOT00000083005,ENSRNOT00000019320,P34926
Pre-frontal cortex	Streptozocin	0	SAPCGSLAFSGDR	19	3	ENSRNOT00000083005,ENSRNOT00000019320,P34926
Pre-frontal cortex	Streptozocin	0	DFQEPLPQK	10	3	ENSRNOT00000083005,ENSRNOT00000019320,P34926
Pre-frontal cortex	Streptozocin	0	HLDFLR	11	3	ENSRNOT00000083005,ENSRNOT00000019320,P34926
Pre-frontal cortex	Streptozocin	0	ATVSPSTDETPAGTLPGGSFSHSALSVDR	24	3	ENSRNOT00000083005,ENSRNOT00000019320,P34926
Pre-frontal cortex	Streptozocin	0	LSGQYAAVFGAPGHTLPPGEPALGEVEER	37	3	ENSRNOT00000083005,ENSRNOT00000019320,P34926
Pre-frontal cortex	Streptozocin	0	EEAEAPHAWER	2	3	ENSRNOT00000083005,ENSRNOT00000019320,P34926
Pre-frontal cortex	Streptozocin	0	DDDEMNTWIQAITSAISSDK	45	3	ENSRNOT00000083528,ENSRNOT00000008210,ENSRNOT00000084595
Pre-frontal cortex	Streptozocin	0	LAEISDVWEEMK	15	3	ENSRNOT00000083528,ENSRNOT00000008210,ENSRNOT00000084595
Pre-frontal cortex	Streptozocin	0	FLQDCQELSLWINEK	25	3	ENSRNOT00000083528,ENSRNOT00000008210,ENSRNOT00000084595
Pre-frontal cortex	Streptozocin	0	HLLGVEDLLQK	23	3	ENSRNOT00000083528,ENSRNOT00000008210,ENSRNOT00000084595
Pre-frontal cortex	Streptozocin	0	DEQSAVSMLK	12	3	ENSRNOT00000083528,ENSRNOT00000008210,ENSRNOT00000084595
Pre-frontal cortex	Streptozocin	0	MGEMVTQGQTDAQYMFLR	4	3	ENSRNOT00000083528,ENSRNOT00000008210,ENSRNOT00000084595
Pre-frontal cortex	Streptozocin	0	DDDEMNTWIQAITSAISSDKHDTSASTQSTPASSR	3	3	ENSRNOT00000083528,ENSRNOT00000008210,ENSRNOT00000084595
Pre-frontal cortex	Streptozocin	0	HSEVPVSLK	7	3	ENSRNOT00000083528,ENSRNOT00000008210,ENSRNOT00000084595
Pre-frontal cortex	Streptozocin	0	GMAFNALIHK	6	3	ENSRNOT00000083528,ENSRNOT00000008210,ENSRNOT00000084595
Pre-frontal cortex	Streptozocin	0	WEYLLELLR	3	3	ENSRNOT00000083528,ENSRNOT00000008210,ENSRNOT00000084595
Pre-frontal cortex	Streptozocin	0	IGSMSDESDPSLSEVHR	3	1	ENSRNOT00000045553
Pre-frontal cortex	Streptozocin	0	ATDAEADVASLNR	9	8	ENSRNOT00000022801,ENSRNOT00000090288,ENSRNOT00000024493,ENSRNOT00000085894,ENSRNOT00000057641,P58775-2,P04692-3,P04692-6
Pre-frontal cortex	Streptozocin	0	DMIDLEANFEK	12	4	ENSRNOT00000055238,ENSRNOT00000087076,P25286,P25286-2
Pre-frontal cortex	Streptozocin	0	EGILNDDIYCPPETAVLLASYAVQSK	2	1	O35763
Pre-frontal cortex	Streptozocin	0	FVIKPIDK	11	3	ENSRNOT00000046746,ENSRNOT00000090033,O35763
Pre-frontal cortex	Streptozocin	0	QLFDQVVK	5	5	ENSRNOT00000034924,ENSRNOT00000085316,ENSRNOT00000046746,ENSRNOT00000090033,O35763
Pre-frontal cortex	Streptozocin	0	YTVDADDR	3	2	ENSRNOT00000011275,P26453-2
Pre-frontal cortex	Streptozocin	0	LELNENPDVLHQDIQQVR	8	2	ENSRNOT00000087182,A6JFQ6
Pre-frontal cortex	Streptozocin	0	LKPPPPVAILPLGTGNDLAR	1	2	ENSRNOT00000024280,ENSRNOT00000091265
Pre-frontal cortex	Streptozocin	0	IFANAHTYHIN	1	3	ENSRNOT00000023139,ENSRNOT00000015318,P56932
Pre-frontal cortex	Streptozocin	0	FCVGFTK	9	2	ENSRNOT00000016329,ENSRNOT00000091626
Pre-frontal cortex	Streptozocin	0	LFCVGFTK	8	2	ENSRNOT00000016329,ENSRNOT00000091626
Pre-frontal cortex	Streptozocin	0	ITVNDLPVGR	10	2	ENSRNOT00000004799,P35704
Pre-frontal cortex	Streptozocin	0	SLNDKFASFIDKVR	1	3	ENSRNOT00000034450,ENSRNOT00000083956,Q6IMF3
Pre-frontal cortex	Streptozocin	0	LVANMLSVAGADHIITMDLHASQIQGFFDIPVDNLYAEPAVLK	1	2	ENSRNOT00000083110,ENSRNOT00000078582
Pre-frontal cortex	Streptozocin	0	GVIECSFVQSK	8	1	P04636
Pre-frontal cortex	Streptozocin	0	NSPLVSR	2	1	P04636
Pre-frontal cortex	Streptozocin	0	HGVYNPNKIFGVTTLDIVR	1	1	P04636
Pre-frontal cortex	Streptozocin	0	ANVKGYLGPEQLPDCLK	1	1	P04636
Pre-frontal cortex	Streptozocin	0	ERPTSLNVFPLADGMVR	3	1	ENSRNOT00000042066
Pre-frontal cortex	Streptozocin	0	QWQLSLDDLK	3	1	P13233
Pre-frontal cortex	Streptozocin	0	LFSPLHALNFGIGGDTTR	17	1	ENSRNOT00000082508
Pre-frontal cortex	Streptozocin	0	TTLEHSDCAFM[15.9949]VDNEAIYDICR	15	6	ENSRNOT00000081355,ENSRNOT00000052352,ENSRNOT00000074096,ENSRNOT00000004797,Q6AYZ1,P68370
Pre-frontal cortex	Streptozocin	0	LISQIVSSITASLR	255	4	ENSRNOT00000081355,ENSRNOT00000074096,ENSRNOT00000004797,Q6AYZ1
Pre-frontal cortex	Streptozocin	0	CMLSNTTAIAEAWAR	6	6	ENSRNOT00000081355,ENSRNOT00000052352,ENSRNOT00000074096,ENSRNOT00000004797,Q6AYZ1,P68370
Pre-frontal cortex	Streptozocin	0	SQIVSSITASLR	7	4	ENSRNOT00000081355,ENSRNOT00000074096,ENSRNOT00000004797,Q6AYZ1
Pre-frontal cortex	Streptozocin	0	QLFHPEQL	9	6	ENSRNOT00000081355,ENSRNOT00000052352,ENSRNOT00000074096,ENSRNOT00000004797,Q6AYZ1,P68370
Pre-frontal cortex	Streptozocin	0	AFVHWY	12	7	ENSRNOT00000081355,ENSRNOT00000052352,ENSRNOT00000074096,ENSRNOT00000004797,ENSRNOT00000075148,Q6AYZ1,P68370
Pre-frontal cortex	Streptozocin	0	LADQCTGLQGFLVFHSFGGGTGSGFTSLLMER	113	3	ENSRNOT00000081355,Q6AYZ1,P68370
Pre-frontal cortex	Streptozocin	0	ECISIHVGQAGVQIGNACWELYCLEHGIQPDGQM[15.9949]PSDK	13	4	ENSRNOT00000081355,ENSRNOT00000052352,Q6AYZ1,P68370
Pre-frontal cortex	Streptozocin	0	KLADQCTGLQGFLVFHSFGGGTGSGFTSLLMER	7	3	ENSRNOT00000081355,Q6AYZ1,P68370
Pre-frontal cortex	Streptozocin	0	LEPTVIDEVR	3	3	ENSRNOT00000081355,Q6AYZ1,P68370
Pre-frontal cortex	Streptozocin	0	FEGPLNVDLIEFQTNLVPYPR	6	1	ENSRNOT00000036821
Pre-frontal cortex	Streptozocin	0	AIMTYVSSFYHAF	12	5	ENSRNOT00000088795,ENSRNOT00000091560,ENSRNOT00000079824,ENSRNOT00000027773,ENSRNOT00000089305
Pre-frontal cortex	Streptozocin	0	DGLGFCALIHR	16	3	ENSRNOT00000088795,ENSRNOT00000091560,ENSRNOT00000079824
Pre-frontal cortex	Streptozocin	0	AIMTYVSSFYHAFSGAQK	14	5	ENSRNOT00000088795,ENSRNOT00000091560,ENSRNOT00000079824,ENSRNOT00000027773,ENSRNOT00000089305
Pre-frontal cortex	Streptozocin	0	IVQTYHVNMAGTNPYTTITPQEINGK	1	3	ENSRNOT00000088795,ENSRNOT00000091560,ENSRNOT00000079824
Pre-frontal cortex	Streptozocin	0	LLLDPAWEK	3	8	ENSRNOT00000088795,ENSRNOT00000091560,ENSRNOT00000079824,ENSRNOT00000026812,ENSRNOT00000024098,ENSRNOT00000090402,ENSRNOT00000027773,ENSRNOT00000089305
Pre-frontal cortex	Streptozocin	0	KESESCDCLQGFQLTH	40	3	ENSRNOT00000086264,ENSRNOT00000023611,ENSRNOT00000083705
Pre-frontal cortex	Streptozocin	0	ESESCDCLQGFQLTH	12	3	ENSRNOT00000086264,ENSRNOT00000023611,ENSRNOT00000083705
Pre-frontal cortex	Streptozocin	0	PDNFVFGQSGAGNNWAK	17	7	ENSRNOT00000086264,ENSRNOT00000023611,ENSRNOT00000083705,ENSRNOT00000084917,ENSRNOT00000013863,ENSRNOT00000075767,Q6P9T8
Pre-frontal cortex	Streptozocin	0	SATFIGNSTAIQELFK	19	5	ENSRNOT00000086264,ENSRNOT00000023611,ENSRNOT00000083705,ENSRNOT00000013863,Q6P9T8
Pre-frontal cortex	Streptozocin	0	YTEGAELVDSVLDVVR	27	8	ENSRNOT00000023452,ENSRNOT00000086264,ENSRNOT00000023611,ENSRNOT00000083705,ENSRNOT00000084917,ENSRNOT00000024947,ENSRNOT00000013863,Q6P9T8
Pre-frontal cortex	Streptozocin	0	IMNTFSVMPSPK	27	4	ENSRNOT00000086264,ENSRNOT00000023611,ENSRNOT00000083705,ENSRNOT00000024947
Pre-frontal cortex	Streptozocin	0	SLGGGTGSGM[15.9949]GTLLISK	11	9	ENSRNOT00000023452,ENSRNOT00000086264,ENSRNOT00000023611,ENSRNOT00000083705,ENSRNOT00000084917,ENSRNOT00000024947,ENSRNOT00000013863,ENSRNOT00000075767,Q6P9T8
Pre-frontal cortex	Streptozocin	0	GQIFRPDNFVFGQSGAGNNWAK	20	7	ENSRNOT00000086264,ENSRNOT00000023611,ENSRNOT00000083705,ENSRNOT00000084917,ENSRNOT00000013863,ENSRNOT00000075767,Q6P9T8
Pre-frontal cortex	Streptozocin	0	FWEVISDEHGID	13	9	ENSRNOT00000023452,ENSRNOT00000086264,ENSRNOT00000023611,ENSRNOT00000083705,ENSRNOT00000084917,ENSRNOT00000024947,ENSRNOT00000013863,ENSRNOT00000075767,Q6P9T8
Pre-frontal cortex	Streptozocin	0	EVDEQMLNVQNKNSSYFVEWIPNNVK	4	7	ENSRNOT00000086264,ENSRNOT00000023611,ENSRNOT00000083705,ENSRNOT00000084917,ENSRNOT00000013863,Q6P9T8,P69897-2
Pre-frontal cortex	Streptozocin	0	LHFFMPGFAP	16	11	ENSRNOT00000023452,ENSRNOT00000086264,ENSRNOT00000023611,ENSRNOT00000083705,ENSRNOT00000084917,ENSRNOT00000024947,ENSRNOT00000075148,ENSRNOT00000013863,ENSRNOT00000075767,Q6P9T8,P69897-2
Pre-frontal cortex	Streptozocin	0	TTPTYGDLNHLVSATMSGVTTCLR	24	6	ENSRNOT00000086264,ENSRNOT00000023611,ENSRNOT00000083705,ENSRNOT00000084917,ENSRNOT00000013863,ENSRNOT00000075767
Pre-frontal cortex	Streptozocin	0	TVPELTQQMFDSK	11	3	ENSRNOT00000086264,ENSRNOT00000023611,ENSRNOT00000083705
Pre-frontal cortex	Streptozocin	0	ALYDICFR	1	10	ENSRNOT00000023452,ENSRNOT00000086264,ENSRNOT00000023611,ENSRNOT00000083705,ENSRNOT00000084917,ENSRNOT00000024947,ENSRNOT00000075148,ENSRNOT00000013863,ENSRNOT00000075767,Q6P9T8
Pre-frontal cortex	Streptozocin	0	SQTTGFPSLITIFSAPNYLDVYNNK	47	4	ENSRNOT00000082236,ENSRNOT00000047975,P20651,P63329-2
Pre-frontal cortex	Streptozocin	0	ITSFEEAK	4	2	ENSRNOT00000047975,P63329-2
Pre-frontal cortex	Streptozocin	0	VYDACMDAFDCLPLAALMNQQFLCVHGGLSPEINTLDDIR	5	2	ENSRNOT00000047975,P63329-2
Pre-frontal cortex	Streptozocin	0	RDAMPSDANLNSINK	1	2	ENSRNOT00000047975,P63329-2
Pre-frontal cortex	Streptozocin	0	MLEMGITGPEGHVLSRPEELEAEAVFR	20	2	ENSRNOT00000087876,Q62952-2
Pre-frontal cortex	Streptozocin	0	CLHGGLSPSIDTLDHIR	3	2	ENSRNOT00000020663,P63331
Pre-frontal cortex	Streptozocin	0	SFLQFDPAPR	2	2	ENSRNOT00000020663,P63331
Pre-frontal cortex	Streptozocin	0	ILLQGTPVAQMAEDAVDGER	12	3	ENSRNOT00000075494,ENSRNOT00000073042,P01026
Pre-frontal cortex	Streptozocin	0	ALAHLLEAER	25	1	Q9QXU9
Pre-frontal cortex	Streptozocin	0	CLAMDVQAFER	15	2	ENSRNOT00000079719,ENSRNOT00000082985
Pre-frontal cortex	Streptozocin	0	GTFDIYVK	12	2	ENSRNOT00000079719,ENSRNOT00000082985
Pre-frontal cortex	Streptozocin	0	SAVDDCQDSWR	12	2	ENSRNOT00000077784,P85968
Pre-frontal cortex	Streptozocin	0	VLLLVK	9	2	ENSRNOT00000077784,P85968
Pre-frontal cortex	Streptozocin	0	GEEGYPQEGILEDMPVDPSSEAYEM[15.9949]PSEEGYQDYEPEA	13	1	ENSRNOT00000039247
Pre-frontal cortex	Streptozocin	0	VGGAVVTGVTAVAQK	4	2	ENSRNOT00000039247,P37377-2
Pre-frontal cortex	Streptozocin	0	ADFAQACQDAGVR	14	2	ENSRNOT00000087432,P52873
Pre-frontal cortex	Streptozocin	0	QVFFELNGQLR	14	2	ENSRNOT00000087432,P52873
Pre-frontal cortex	Streptozocin	0	LYECPWR	11	2	ENSRNOT00000087432,P52873
Pre-frontal cortex	Streptozocin	0	SKVDEAVAVLQAH	6	3	ENSRNOT00000056592,ENSRNOT00000067752,Q9EPH8
Pre-frontal cortex	Streptozocin	0	VLVADFLEQNYDTIFEDYEK	4	2	ENSRNOT00000084505,ENSRNOT00000016162
Pre-frontal cortex	Streptozocin	0	LIEFLSSFQK	10	1	ENSRNOT00000016162
Pre-frontal cortex	Streptozocin	0	LGELILDR	3	4	ENSRNOT00000084505,ENSRNOT00000016162,ENSRNOT00000066440,ENSRNOT00000085332
Pre-frontal cortex	Streptozocin	0	VATTGQILNIPDAYAHPLFYR	12	3	ENSRNOT00000026586,ENSRNOT00000090959,Q01062
Pre-frontal cortex	Streptozocin	0	LVAPLAPDTQVLVIPLLDK	4	3	ENSRNOT00000026586,ENSRNOT00000090959,Q01062
Pre-frontal cortex	Streptozocin	0	MAEVGYDR	3	3	ENSRNOT00000026586,ENSRNOT00000090959,Q01062
Pre-frontal cortex	Streptozocin	0	PFGCVTLGDK	12	2	ENSRNOT00000090239,Q63092
Pre-frontal cortex	Streptozocin	0	TPGTWSHITEQIGMFSFTGLNPK	37	1	P13221
Pre-frontal cortex	Streptozocin	0	AHNPTGTDPTEEEWK	35	1	P13221
Pre-frontal cortex	Streptozocin	0	KVNLGVGAYR	25	1	P13221
Pre-frontal cortex	Streptozocin	0	IGADFLGR	12	1	P13221
Pre-frontal cortex	Streptozocin	0	TPGTWSHITEQIGMFSF	9	1	P13221
Pre-frontal cortex	Streptozocin	0	YISQCIDEIKQELK	15	1	ENSRNOT00000025878
Pre-frontal cortex	Streptozocin	0	YLSLAPLFFK	6	1	ENSRNOT00000025878
Pre-frontal cortex	Streptozocin	0	DLANDIMTLMSHTK	13	1	ENSRNOT00000025878
Pre-frontal cortex	Streptozocin	0	DLANDIMTLMSHTKPY	2	1	ENSRNOT00000025878
Pre-frontal cortex	Streptozocin	0	NLLDAVDQAK	13	3	ENSRNOT00000030007,P70600-2,P70600-3
Pre-frontal cortex	Streptozocin	0	LQTGMR	2	1	ENSRNOT00000083951
Pre-frontal cortex	Streptozocin	0	QAEDCITR	3	1	Q9QX69
Pre-frontal cortex	Streptozocin	0	FLADLLVPTK	12	1	Q9QX69
Pre-frontal cortex	Streptozocin	0	ELSTTLNADEAVTR	17	2	ENSRNOT00000023628,O88600
Pre-frontal cortex	Streptozocin	0	LMNETTAVALAYGIYK	36	3	ENSRNOT00000023628,ENSRNOT00000015474,O88600
Pre-frontal cortex	Streptozocin	0	NVVFVDMGH	9	2	ENSRNOT00000023628,O88600
Pre-frontal cortex	Streptozocin	0	SEESEEPMETDQNAKEEEK	15	2	ENSRNOT00000023628,O88600
Pre-frontal cortex	Streptozocin	0	ELTNICSPIISK	15	2	ENSRNOT00000023628,O88600
Pre-frontal cortex	Streptozocin	0	PFVEAEK	1	2	ENSRNOT00000023628,O88600
Pre-frontal cortex	Streptozocin	0	KPVTDCVISVPSFFTDAER	30	1	ENSRNOT00000001201
Pre-frontal cortex	Streptozocin	0	EYFDYVR	6	2	ENSRNOT00000058151,Q6AYN4-2
Pre-frontal cortex	Streptozocin	0	LSLEAIQLCDR	1	1	ENSRNOT00000058151
Pre-frontal cortex	Streptozocin	0	TVGECLDATAQR	12	1	Q499N5
Pre-frontal cortex	Streptozocin	0	SCQTALAEILDVLVR	36	2	ENSRNOT00000085211,ENSRNOT00000090786
Pre-frontal cortex	Streptozocin	0	LLGHQQSDMELEIQQK	2	3	ENSRNOT00000057395,ENSRNOT00000085211,ENSRNOT00000090786
Pre-frontal cortex	Streptozocin	0	PAAVVLQTK	12	1	ENSRNOT00000035650
Pre-frontal cortex	Streptozocin	0	DNEDYDPQTVR	12	2	ENSRNOT00000080651,ENSRNOT00000048980
Pre-frontal cortex	Streptozocin	0	LAQQISDEASR	2	2	ENSRNOT00000080651,ENSRNOT00000048980
Pre-frontal cortex	Streptozocin	0	TGETGVEETILEGHLGVTK	13	2	ENSRNOT00000080651,ENSRNOT00000048980
Pre-frontal cortex	Streptozocin	0	DGLFDTIQR	4	2	ENSRNOT00000080651,ENSRNOT00000048980
Pre-frontal cortex	Streptozocin	0	LIGQLNLK	5	2	ENSRNOT00000080651,ENSRNOT00000048980
Pre-frontal cortex	Streptozocin	0	IELFVGGELIDPGDDRK	2	2	ENSRNOT00000080651,ENSRNOT00000048980
Pre-frontal cortex	Streptozocin	0	ASPGPSSQAYDNLSLSDHLLR	1	2	ENSRNOT00000080651,ENSRNOT00000048980
Pre-frontal cortex	Streptozocin	0	EFEETMDALQADIDQLEAEK	35	3	ENSRNOT00000068102,ENSRNOT00000078175,P28023
Pre-frontal cortex	Streptozocin	0	GSQVSDTLLDCR	3	3	ENSRNOT00000068102,ENSRNOT00000078175,P28023
Pre-frontal cortex	Streptozocin	0	AESLQQEVEALK	5	3	ENSRNOT00000068102,ENSRNOT00000078175,P28023
Pre-frontal cortex	Streptozocin	0	QSCSILISTMNK	12	3	ENSRNOT00000068102,ENSRNOT00000078175,P28023
Pre-frontal cortex	Streptozocin	0	ELTNQQEASVER	14	3	ENSRNOT00000068102,ENSRNOT00000078175,P28023
Pre-frontal cortex	Streptozocin	0	AIEMELR	4	3	ENSRNOT00000068102,ENSRNOT00000078175,P28023
Pre-frontal cortex	Streptozocin	0	QLTAHLQDVNR	16	3	ENSRNOT00000068102,ENSRNOT00000078175,P28023
Pre-frontal cortex	Streptozocin	0	SIFVTCGDWDLK	11	1	ENSRNOT00000093099
Pre-frontal cortex	Streptozocin	0	LHACTEEGQLENQVIAFEWDEMQR	4	3	ENSRNOT00000028389,Q8K4V4,Q8K4V4-2
Pre-frontal cortex	Streptozocin	0	EWSLESSPAQNWTPPQPK	16	5	ENSRNOT00000013900,ENSRNOT00000082267,ENSRNOT00000055038,Q62848-2,Q62848-3
Pre-frontal cortex	Streptozocin	0	TCLITFLLAGIECPR	11	2	ENSRNOT00000048252,ENSRNOT00000047698
Pre-frontal cortex	Streptozocin	0	VTIAQGGVLPNIQAVLLPK	32	9	ENSRNOT00000089758,A9UMV8,P02262,Q64598,P0CC09,Q00728,P0C170,P0C169,Q4FZT6
Pre-frontal cortex	Streptozocin	0	FVLPVSGPVPWGIEVPGVIR	20	1	ENSRNOT00000037246
Pre-frontal cortex	Streptozocin	0	EELNFLAR	8	1	ENSRNOT00000037246
Pre-frontal cortex	Streptozocin	0	SAVGFDYQGK	10	1	Q66HL2
Pre-frontal cortex	Streptozocin	0	EWLCLNCQMQR	10	5	ENSRNOT00000082113,Q9JKS6,Q9JKS6-2,Q9JKS6-3,O88778
Pre-frontal cortex	Streptozocin	0	ETGDGIILEVLDAYK	16	5	ENSRNOT00000007608,ENSRNOT00000008637,Q9JKS6,Q9JKS6-2,Q9JKS6-3
Pre-frontal cortex	Streptozocin	0	TSVAQTHLEDAGVAIAAAEAAVQQLR	26	5	ENSRNOT00000007608,ENSRNOT00000008637,Q9JKS6,Q9JKS6-2,Q9JKS6-3
Pre-frontal cortex	Streptozocin	0	TICPLCNTTELLLHIPEK	11	3	Q9JKS6,Q9JKS6-2,Q9JKS6-3
Pre-frontal cortex	Streptozocin	0	QAELDEEEKEIDAK	1	7	ENSRNOT00000082113,ENSRNOT00000007608,ENSRNOT00000008637,Q9JKS6,Q9JKS6-2,Q9JKS6-3,O88778
Pre-frontal cortex	Streptozocin	0	YSLDPENPTK	12	3	ENSRNOT00000030173,ENSRNOT00000029782,P24049
Pre-frontal cortex	Streptozocin	0	TNLEFLQEQFNSIAAHVLHCTDSGFGAR	16	3	ENSRNOT00000060832,ENSRNOT00000085598,Q6MG49-2
Pre-frontal cortex	Streptozocin	0	HMMAFIEQEANEK	29	3	ENSRNOT00000016495,ENSRNOT00000020845,Q6PCU2
Pre-frontal cortex	Streptozocin	0	YQVLLDGLVLQGLYQLLEPR	52	2	ENSRNOT00000016495,Q6PCU2
Pre-frontal cortex	Streptozocin	0	KQDFPLVK	28	2	ENSRNOT00000016495,Q6PCU2
Pre-frontal cortex	Streptozocin	0	EGRPSGEAFVELESEDEVK	3	5	ENSRNOT00000067188,ENSRNOT00000059190,ENSRNOT00000015518,Q8VHV7,Q8VHV7-2
Pre-frontal cortex	Streptozocin	0	NCDLMWK	12	1	ENSRNOT00000004385
Pre-frontal cortex	Streptozocin	0	ENEM[15.9949]DENLEQVSGIIGNLR	2	4	ENSRNOT00000080581,ENSRNOT00000007998,P60881,P60881-2
Pre-frontal cortex	Streptozocin	0	LLGPDAAINLADPDGALAK	15	2	ENSRNOT00000008120,ENSRNOT00000087495
Pre-frontal cortex	Streptozocin	0	WSPVASTLPELVQR	18	2	ENSRNOT00000008120,ENSRNOT00000087495
Pre-frontal cortex	Streptozocin	0	GLDFSDR	9	2	ENSRNOT00000008120,ENSRNOT00000087495
Pre-frontal cortex	Streptozocin	0	LNWAFEMYDLDGDGR	17	1	ENSRNOT00000074347
Pre-frontal cortex	Streptozocin	0	MVGTVIMM[15.9949]R	3	1	ENSRNOT00000074347
Pre-frontal cortex	Streptozocin	0	MVGTVIM[15.9949]MR	1	1	ENSRNOT00000074347
Pre-frontal cortex	Streptozocin	0	LYIKFFPYGDASK	3	1	ENSRNOT00000074347
Pre-frontal cortex	Streptozocin	0	LRPEVMQDLLESTDFTEHEIQEWYK	34	1	ENSRNOT00000064513
Pre-frontal cortex	Streptozocin	0	LEIVQAIYK	3	3	ENSRNOT00000009153,ENSRNOT00000007374,ENSRNOT00000064513
Pre-frontal cortex	Streptozocin	0	PAMETAAEENTEQSQER	23	3	ENSRNOT00000006777,ENSRNOT00000086721,Q9JJK1
Pre-frontal cortex	Streptozocin	0	MKPAMETAAEENTEQSQER	12	3	ENSRNOT00000006777,ENSRNOT00000086721,Q9JJK1
Pre-frontal cortex	Streptozocin	0	QYLFSLYECR	13	1	ENSRNOT00000009249
Pre-frontal cortex	Streptozocin	0	IGLFYMDNDLITR	9	1	ENSRNOT00000009249
Pre-frontal cortex	Streptozocin	0	IDDIVSGHK	7	1	Q6P502
Pre-frontal cortex	Streptozocin	0	IYSTAFDYFSCPPK	12	1	O08662
Pre-frontal cortex	Streptozocin	0	GFYFNTVLSLAR	6	1	O08662
Pre-frontal cortex	Streptozocin	0	EFYIPLEMLR	11	1	O08662
Pre-frontal cortex	Streptozocin	0	VMEANPSADLYYTTFSDPVYLTMFK	10	1	O08662
Pre-frontal cortex	Streptozocin	0	NTEAIGNEVTR	6	1	O08662
Pre-frontal cortex	Streptozocin	0	FGLFSAETK	2	1	O08662
Pre-frontal cortex	Streptozocin	0	SNLDITVGSR	5	1	O08662
Pre-frontal cortex	Streptozocin	0	TNIYLDEEGHQK	3	1	O08662
Pre-frontal cortex	Streptozocin	0	VIIAHLPLLIC	1	1	O08662
Pre-frontal cortex	Streptozocin	0	ILVNETESLWALLSK	18	1	ENSRNOT00000026367
Pre-frontal cortex	Streptozocin	0	VLSNEPAASAAEEEVEDDALVR	4	1	ENSRNOT00000054913
Pre-frontal cortex	Streptozocin	0	LSEVVTVILK	3	1	ENSRNOT00000054913
Pre-frontal cortex	Streptozocin	0	AASAFFTYVSLNQEGKPLPVPQLVPETEDEK	30	3	ENSRNOT00000000079,ENSRNOT00000014213,Q64559-1
Pre-frontal cortex	Streptozocin	0	GCVITISGR	13	3	ENSRNOT00000000079,ENSRNOT00000014213,Q64559-1
Pre-frontal cortex	Streptozocin	0	PLPVPQLVPETEDEK	20	3	ENSRNOT00000000079,ENSRNOT00000014213,Q64559-1
Pre-frontal cortex	Streptozocin	0	LLSEEVFDFSSGQITQVK	22	1	ENSRNOT00000014062
Pre-frontal cortex	Streptozocin	0	EFAGEDTSDLFLEER	2	1	ENSRNOT00000014062
Pre-frontal cortex	Streptozocin	0	IYLDMLNVYK	12	1	ENSRNOT00000014062
Pre-frontal cortex	Streptozocin	0	ISTPLNPGSPVSNQMFIQDYVANLLK	32	1	ENSRNOT00000014062
Pre-frontal cortex	Streptozocin	0	ACVVAGLR	1	1	D3ZVR7
Pre-frontal cortex	Streptozocin	0	YCLFGNNVTLANK	5	2	ENSRNOT00000017190,P19686
Pre-frontal cortex	Streptozocin	0	TPQLTSLAMLMLDSYYR	23	2	ENSRNOT00000003638,ENSRNOT00000078032
Pre-frontal cortex	Streptozocin	0	IGAQSHGDNSCGIEIVCK	4	2	ENSRNOT00000003638,ENSRNOT00000078032
Pre-frontal cortex	Streptozocin	0	LYDPLLEYR	9	1	ENSRNOT00000008566
Pre-frontal cortex	Streptozocin	0	LMMDPLTGLNR	11	4	ENSRNOT00000074515,ENSRNOT00000041655,ENSRNOT00000078891,Q7TP47
Pre-frontal cortex	Streptozocin	0	LFVGSIPK	8	5	ENSRNOT00000015971,ENSRNOT00000074515,ENSRNOT00000041655,ENSRNOT00000078891,Q7TP47
Pre-frontal cortex	Streptozocin	0	ALMQLDFQQFLMK	2	1	ENSRNOT00000067087
Pre-frontal cortex	Streptozocin	0	SEVLQESIR	4	1	ENSRNOT00000067087
Pre-frontal cortex	Streptozocin	0	SLDDIDLSALR	12	3	ENSRNOT00000086374,ENSRNOT00000040488,ENSRNOT00000089853
Pre-frontal cortex	Streptozocin	0	PSQTQVLHEPLIDEDPVFIATCTER	13	1	ENSRNOT00000058080
Pre-frontal cortex	Streptozocin	0	VQPFLDSLQSGFDAAFR	9	1	ENSRNOT00000058080
Pre-frontal cortex	Streptozocin	0	DFLTGMCLFLQSLR	11	1	ENSRNOT00000026854
Pre-frontal cortex	Streptozocin	0	VAENGAQSAPLPLEGVDISPK	1	1	ENSRNOT00000008737
Pre-frontal cortex	Streptozocin	0	AWDIAVATMK	10	1	ENSRNOT00000008737
Pre-frontal cortex	Streptozocin	0	YLLSQSSPAPLTAAEEELR	18	2	ENSRNOT00000016814,ENSRNOT00000038032
Pre-frontal cortex	Streptozocin	0	YHFFLYK	10	3	ENSRNOT00000074683,ENSRNOT00000016814,ENSRNOT00000038032
Pre-frontal cortex	Streptozocin	0	EDVSLHGYR	8	2	ENSRNOT00000016814,ENSRNOT00000038032
Pre-frontal cortex	Streptozocin	0	SFEAPATINSASLHPEK	16	1	ENSRNOT00000009923
Pre-frontal cortex	Streptozocin	0	AILVVFANK	13	1	ENSRNOT00000007623
Pre-frontal cortex	Streptozocin	0	FQVWDLGGQTSIRPY	5	1	ENSRNOT00000007623
Pre-frontal cortex	Streptozocin	0	VCFWFVPPSLR	4	3	ENSRNOT00000016205,ENSRNOT00000079678,ENSRNOT00000024901
Pre-frontal cortex	Streptozocin	0	SVAYQEFLR	8	4	ENSRNOT00000022049,ENSRNOT00000020123,O35430,O35430-2
Pre-frontal cortex	Streptozocin	0	PMMPLSCFLGNVYAESVDVLR	1	3	ENSRNOT00000085891,ENSRNOT00000020003,O08654
Pre-frontal cortex	Streptozocin	0	QTQYVLDVQYSPTAR	1	2	ENSRNOT00000026793,Q1WIM1
Pre-frontal cortex	Streptozocin	0	FQLEEFSPR	6	2	ENSRNOT00000026793,Q1WIM1
Pre-frontal cortex	Streptozocin	0	LYPILMSSGLPR	2	5	ENSRNOT00000079418,Q9JKC9,Q9JKC9-2,Q9JKC9-3,Q9JKC9-4
Pre-frontal cortex	Streptozocin	0	STGTDDGFTDFK	2	5	ENSRNOT00000079418,Q9JKC9,Q9JKC9-2,Q9JKC9-3,Q9JKC9-4
Pre-frontal cortex	Streptozocin	0	EDLNVNEVFK	4	1	ENSRNOT00000016933
Pre-frontal cortex	Streptozocin	0	NGVAPIIDVVR	9	1	P18445
Pre-frontal cortex	Streptozocin	0	VSGELFAQAPVEQYPGIAVETVADSSR	45	1	ENSRNOT00000013272
Pre-frontal cortex	Streptozocin	0	NILLTNEQLENAR	4	2	ENSRNOT00000024707,Q63965
Pre-frontal cortex	Streptozocin	0	YAYDSAFHPDTGEK	2	2	ENSRNOT00000024707,Q63965
Pre-frontal cortex	Streptozocin	0	APGALLAAAGLSESATEIVER	1	1	ENSRNOT00000028495
Pre-frontal cortex	Streptozocin	0	EGLIVGFIR	4	1	ENSRNOT00000028495
Pre-frontal cortex	Streptozocin	0	IIQENLNLALNSASAIGCHVVNIGAEDLR	27	2	ENSRNOT00000060168,Q63598
Pre-frontal cortex	Streptozocin	0	HVIPMNPNTDDLFK	23	2	ENSRNOT00000060168,Q63598
Pre-frontal cortex	Streptozocin	0	DLPPILLVR	1	1	ENSRNOT00000021921
Pre-frontal cortex	Streptozocin	0	SMAPEPAQSSTITSSAQHVK	3	1	ENSRNOT00000072733
Pre-frontal cortex	Streptozocin	0	YSHISMLDYNPK	1	2	ENSRNOT00000013443,Q62609-3
Pre-frontal cortex	Streptozocin	0	IFEQVLSELEPLCLAEQDFISK	48	3	ENSRNOT00000059814,ENSRNOT00000091230,ENSRNOT00000090470
Pre-frontal cortex	Streptozocin	0	QPGFPQPSPSDDPSLSPR	1	1	ENSRNOT00000028070
Pre-frontal cortex	Streptozocin	0	LENFEAAVHLYGK	22	1	ENSRNOT00000026960
Pre-frontal cortex	Streptozocin	0	AIELNPANAVYFCNR	21	1	ENSRNOT00000026960
Pre-frontal cortex	Streptozocin	0	DQLIYLLEQLPGK	12	1	ENSRNOT00000017862
Pre-frontal cortex	Streptozocin	0	YIANLVNADK	2	1	ENSRNOT00000017862
Pre-frontal cortex	Streptozocin	0	ANGAPISQGVDTANPTK	1	1	P20767
Pre-frontal cortex	Streptozocin	0	NSFTCQVTHEGNTVEK	14	1	P20767
Pre-frontal cortex	Streptozocin	0	LGALQGDPDALNLYR	6	1	ENSRNOT00000018717
Pre-frontal cortex	Streptozocin	0	SCGLVLCEPCR	1	1	ENSRNOT00000013675
Pre-frontal cortex	Streptozocin	0	EGLTCPVGIALTPK	1	1	ENSRNOT00000013675
Pre-frontal cortex	Streptozocin	0	RVQEELAR	1	1	ENSRNOT00000013675
Pre-frontal cortex	Streptozocin	0	SQLLILDR	8	3	ENSRNOT00000021178,ENSRNOT00000027666,P61765-2
Pre-frontal cortex	Streptozocin	0	VQEAVNYGLQVLDSAFEQLDIK	7	4	ENSRNOT00000015620,ENSRNOT00000092277,ENSRNOT00000092594,Q80X08
Pre-frontal cortex	Streptozocin	0	MIISELVHNNLR	10	15	ENSRNOT00000043971,ENSRNOT00000042256,ENSRNOT00000045905,ENSRNOT00000045020,O88917,O88917-2,O88917-3,O88917-4,O88923,O88923-1,O88923-2,O88923-3,O88923-4,O88923-5,O88923-6
Pre-frontal cortex	Streptozocin	0	VDYAFNTNANR	2	5	ENSRNOT00000043971,O88917,O88917-2,O88917-3,O88917-4
Pre-frontal cortex	Streptozocin	0	YLEVQYDCVPYK	1	2	O88917,O88917-4
Pre-frontal cortex	Streptozocin	0	FPELVK	7	1	ENSRNOT00000009564
Pre-frontal cortex	Streptozocin	0	VDNMIIQSISLLDQLDKDINTFSMR	1	1	ENSRNOT00000009564
Pre-frontal cortex	Streptozocin	0	EHWIIECNDGVFQR	2	2	ENSRNOT00000028969,P10868
Pre-frontal cortex	Streptozocin	0	EVEDKESEGEEEDEDEDLSK	17	2	ENSRNOT00000055259,O35986
Pre-frontal cortex	Streptozocin	0	LLDMLSK	6	1	ENSRNOT00000021816
Pre-frontal cortex	Streptozocin	0	AENIMLLELDMPSR	3	1	ENSRNOT00000013804
Pre-frontal cortex	Streptozocin	0	ATGPPVSELITK	7	1	D3ZBN0
Pre-frontal cortex	Streptozocin	0	RLEEALMADMLAHVEELAR	1	1	ENSRNOT00000049170
Pre-frontal cortex	Streptozocin	0	LQEQLGNDVVEK	15	1	ENSRNOT00000003542
Pre-frontal cortex	Streptozocin	0	GTFIEFR	13	2	ENSRNOT00000007164,ENSRNOT00000003542
Pre-frontal cortex	Streptozocin	0	SILIGEILEK	14	1	ENSRNOT00000022410
Pre-frontal cortex	Streptozocin	0	FTFVTPTFYR	1	1	ENSRNOT00000022951
Pre-frontal cortex	Streptozocin	0	QLGLVVCR	1	1	ENSRNOT00000026551
Pre-frontal cortex	Streptozocin	0	VQEAVDAMVK	14	1	ENSRNOT00000022014
Pre-frontal cortex	Streptozocin	0	IDNLIDPGSPFLEFSQFAGYK	1	2	ENSRNOT00000076389,Q5XIT9
Pre-frontal cortex	Streptozocin	0	QVVLIPGLISGLEEDQYGMPLAIFTK	10	1	ENSRNOT00000018425
Pre-frontal cortex	Streptozocin	0	DLFGLSVLIR	1	2	ENSRNOT00000024659,P97849
Pre-frontal cortex	Streptozocin	0	DHDMFGYIK	1	1	ENSRNOT00000016509
Pre-frontal cortex	Streptozocin	0	LNHNAAFVQIPIGLEGDFK	12	2	ENSRNOT00000017608,Q07803
Pre-frontal cortex	Streptozocin	0	GSFGLHAQPEFLR	4	1	ENSRNOT00000071764
Pre-frontal cortex	Streptozocin	0	EVATDGLLQGNPR	1	2	ENSRNOT00000002083,ENSRNOT00000067076
Pre-frontal cortex	Streptozocin	0	GGFFSPWK	3	5	ENSRNOT00000078799,ENSRNOT00000066643,O88382,O88382-2,O88382-3
Pre-frontal cortex	Streptozocin	0	ALFADDIEEMVER	5	2	ENSRNOT00000004722,Q8CGS5
Pre-frontal cortex	Streptozocin	0	DYGSSPLHR	4	5	ENSRNOT00000044865,ENSRNOT00000091650,ENSRNOT00000041277,Q00438,Q00438-2
Pre-frontal cortex	Streptozocin	0	LSAVQKGLDGRQTGR	1	1	ENSRNOT00000082696
Pre-frontal cortex	Streptozocin	0	GCSIWCVELIR	1	2	ENSRNOT00000061249,ENSRNOT00000089138
Pre-frontal cortex	Streptozocin	0	SKDPQEILLNEK	1	1	ENSRNOT00000013279
Pre-frontal cortex	Streptozocin	0	VPEAPVIDTQR	2	2	ENSRNOT00000089781,A0A0G2JXN2
Pre-frontal cortex	Streptozocin	0	ITQWEDPR	1	4	ENSRNOT00000023890,ENSRNOT00000088624,ENSRNOT00000083363,ENSRNOT00000078235
Pre-frontal cortex	Streptozocin	0	LDFGNFQGK	2	1	ENSRNOT00000043752
Pre-frontal cortex	Streptozocin	0	LYKESYHK	1	2	ENSRNOT00000076095,ENSRNOT00000059461
Pre-frontal cortex	Streptozocin	0	VCNPIITK	10	3	ENSRNOT00000089762,ENSRNOT00000041740,P63018
Pre-frontal cortex	Streptozocin	0	VQVEYKGETK	3	2	ENSRNOT00000041740,P63018
Pre-frontal cortex	Streptozocin	0	AVVQSDMK	2	1	P63018
Pre-frontal cortex	Streptozocin	0	NQVAMNPTNTVFDAKR	1	2	ENSRNOT00000041740,P63018
Pre-frontal cortex	Streptozocin	0	AVILELK	7	2	ENSRNOT00000027045,ENSRNOT00000082486
Pre-frontal cortex	Streptozocin	0	MTDEEILEK	1	1	ENSRNOT00000089141
Pre-frontal cortex	Streptozocin	0	DLNFER	10	4	ENSRNOT00000085897,ENSRNOT00000040540,Q8VBU2,Q8VBU2-2
Pre-frontal cortex	Streptozocin	0	SLITHAPNLENIELY	2	4	ENSRNOT00000085897,ENSRNOT00000040540,Q8VBU2,Q8VBU2-2
Pre-frontal cortex	Streptozocin	0	SDSDYDLSPKSM[15.9949]SR	1	6	P14270,P14270-1,P14270-8,P14270-4,P14270-9,P14270-6
Pre-frontal cortex	Streptozocin	0	SLLSDVFPGVQYHR	3	3	ENSRNOT00000073950,ENSRNOT00000009377,P38650
Pre-frontal cortex	Streptozocin	0	FDHYCEYR	5	3	ENSRNOT00000073950,ENSRNOT00000009377,P38650
Pre-frontal cortex	Streptozocin	0	ENFIPTIVNFSAEEISDAIR	44	3	ENSRNOT00000073950,ENSRNOT00000009377,P38650
Pre-frontal cortex	Streptozocin	0	SSLQSQCLNEVLK	4	3	ENSRNOT00000073950,ENSRNOT00000009377,P38650
Pre-frontal cortex	Streptozocin	0	SLETCMYDHK	26	3	ENSRNOT00000073950,ENSRNOT00000009377,P38650
Pre-frontal cortex	Streptozocin	0	EFGPVVIDYGK	8	3	ENSRNOT00000073950,ENSRNOT00000009377,P38650
Pre-frontal cortex	Streptozocin	0	WLVLFCDEINLPDMDK	5	3	ENSRNOT00000073950,ENSRNOT00000009377,P38650
Pre-frontal cortex	Streptozocin	0	ALGEYLER	7	3	ENSRNOT00000073950,ENSRNOT00000009377,P38650
Pre-frontal cortex	Streptozocin	0	AATSPALFNR	9	3	ENSRNOT00000073950,ENSRNOT00000009377,P38650
Pre-frontal cortex	Streptozocin	0	EAIVNSCVFVHQTLHQANAR	13	3	ENSRNOT00000073950,ENSRNOT00000009377,P38650
Pre-frontal cortex	Streptozocin	0	HFVGM[15.9949]LPEK	1	2	ENSRNOT00000007794,ENSRNOT00000034790
Pre-frontal cortex	Streptozocin	0	KEELM[15.9949]FFLWAPEQAPLK	1	2	ENSRNOT00000007794,ENSRNOT00000034790
Pre-frontal cortex	Streptozocin	0	VAEIPFNSTNK	12	5	ENSRNOT00000064601,ENSRNOT00000027497,ENSRNOT00000058143,P54708,P54708-2
Pre-frontal cortex	Streptozocin	0	ADCLVPSEIR	9	5	ENSRNOT00000041168,ENSRNOT00000051680,Q9JJM9,Q9JJM9-2,Q9JJM9-3
Pre-frontal cortex	Streptozocin	0	MQEMLQK	8	4	ENSRNOT00000041168,ENSRNOT00000051680,Q9JJM9,Q9JJM9-2
Pre-frontal cortex	Streptozocin	0	TIAPALVSK	15	3	ENSRNOT00000081579,ENSRNOT00000034026,ENSRNOT00000073655
Pre-frontal cortex	Streptozocin	0	LNVVEQEK	10	3	ENSRNOT00000081579,ENSRNOT00000034026,ENSRNOT00000073655
Pre-frontal cortex	Streptozocin	0	MILPVGASSFR	10	3	ENSRNOT00000081579,ENSRNOT00000034026,ENSRNOT00000073655
Pre-frontal cortex	Streptozocin	0	LAM[15.9949]QEFM[15.9949]ILPVGASSFREAMR	1	3	ENSRNOT00000081579,ENSRNOT00000034026,ENSRNOT00000073655
Pre-frontal cortex	Streptozocin	0	VTHLSTLQVGSLSVK	19	1	ENSRNOT00000020192
Pre-frontal cortex	Streptozocin	0	KLVIIEGDLER	30	4	ENSRNOT00000023567,ENSRNOT00000029076,Q63610-2,Q63610-3
Pre-frontal cortex	Streptozocin	0	MLDQTLLDLNEM	13	1	ENSRNOT00000023567
Pre-frontal cortex	Streptozocin	0	TAHSFEQVLTDITDAIK	27	2	ENSRNOT00000093407,ENSRNOT00000078337
Pre-frontal cortex	Streptozocin	0	TLSDNVNLPQGVR	16	2	ENSRNOT00000093407,ENSRNOT00000078337
Pre-frontal cortex	Streptozocin	0	PSSTAAGVSVIATTALDK	12	2	ENSRNOT00000019748,ENSRNOT00000093407
Pre-frontal cortex	Streptozocin	0	AQPAPPELNSESEDYSPSSSETVR	1	2	ENSRNOT00000019748,ENSRNOT00000093407
Pre-frontal cortex	Streptozocin	0	TLCEIFK	1	5	ENSRNOT00000001493,ENSRNOT00000066810,P29476,P29476-2,P29476-3
Pre-frontal cortex	Streptozocin	0	LINLTDILK	5	2	ENSRNOT00000085588,A0A0G2K344
Pre-frontal cortex	Streptozocin	0	STLNELVDYITISR	28	2	ENSRNOT00000077715,ENSRNOT00000006755
Pre-frontal cortex	Streptozocin	0	APVIWDNIHANDYDQK	12	2	ENSRNOT00000065172,Q8VIJ5
Pre-frontal cortex	Streptozocin	0	ADGGPRVSFYQLSHFLQCK	4	2	P11507,P11507-2
Pre-frontal cortex	Streptozocin	0	CLALATHDNPLR	26	2	P11507,P11507-2
Pre-frontal cortex	Streptozocin	0	CHQYDGLVELATICALCNDSALDYNEAK	11	2	P11507,P11507-2
Pre-frontal cortex	Streptozocin	0	CLELFTELAEDKENYK	35	1	P82995
Pre-frontal cortex	Streptozocin	0	CLELFTELAEDK	10	1	P82995
Pre-frontal cortex	Streptozocin	0	MIEPIDEYCVQQLK	14	1	P82995
Pre-frontal cortex	Streptozocin	0	DDITNEEYGEFYK	4	1	P82995
Pre-frontal cortex	Streptozocin	0	IMDNCEELIPEYLNFIR	12	1	P82995
Pre-frontal cortex	Streptozocin	0	TLVSVTK	5	1	P82995
Pre-frontal cortex	Streptozocin	0	VFIMDNCEELIPEYLNF	1	1	P82995
Pre-frontal cortex	Streptozocin	0	TTIVICCSPSVFNEAETK	7	2	ENSRNOT00000006341,ENSRNOT00000081744
Pre-frontal cortex	Streptozocin	0	DKPMYDEIFYTLSPVDGK	23	2	ENSRNOT00000084773,ENSRNOT00000010419
Pre-frontal cortex	Streptozocin	0	ADQIETQQLMR	6	3	ENSRNOT00000084773,ENSRNOT00000010419,ENSRNOT00000054830
Pre-frontal cortex	Streptozocin	0	KKDPEVFQTVSEGLK	14	2	ENSRNOT00000084773,ENSRNOT00000010419
Pre-frontal cortex	Streptozocin	0	HQISPGDFPNLK	3	2	ENSRNOT00000084773,ENSRNOT00000010419
Pre-frontal cortex	Streptozocin	0	LPNSVLGK	1	3	ENSRNOT00000084773,ENSRNOT00000010419,ENSRNOT00000010701
Pre-frontal cortex	Streptozocin	0	KVINAFDDGLK	32	2	ENSRNOT00000089125,ENSRNOT00000087661
Pre-frontal cortex	Streptozocin	0	GVASALAHK	11	5	ENSRNOT00000090422,ENSRNOT00000089125,ENSRNOT00000087661,P11517,P02091
Pre-frontal cortex	Streptozocin	0	GHGGEYGEEALQR	7	2	ENSRNOT00000048977,ENSRNOT00000051483
Pre-frontal cortex	Streptozocin	0	VLSADDKTNIK	2	1	ENSRNOT00000051483
Pre-frontal cortex	Streptozocin	0	LTLSDFLIKPIQR	4	4	ENSRNOT00000049292,P97924,P97924-4,P97924-7
Pre-frontal cortex	Streptozocin	0	NLDQEQLSQVLDAMFEK	29	1	ENSRNOT00000027552
Pre-frontal cortex	Streptozocin	0	NISHYEEQLVK	8	2	ENSRNOT00000027552,ENSRNOT00000088705
Pre-frontal cortex	Streptozocin	0	IGPSILNSDLANLGAECLR	3	1	ENSRNOT00000017197
Pre-frontal cortex	Streptozocin	0	SNNVEMDWVLK	5	5	ENSRNOT00000067188,ENSRNOT00000059190,Q8VHV7,Q8VHV7-2,Q8VHV7-3
Pre-frontal cortex	Streptozocin	0	GITLPVDFQGR	4	4	ENSRNOT00000059190,Q8VHV7,Q8VHV7-2,Q8VHV7-3
Pre-frontal cortex	Streptozocin	0	AAEDMPEAEQDLER	5	3	ENSRNOT00000020123,O35430,O35430-2
Pre-frontal cortex	Streptozocin	0	AEDEPYAEPYADYGGLQEHVYEEIGDAPELEAR	1	3	ENSRNOT00000020123,O35430,O35430-2
Pre-frontal cortex	Streptozocin	0	IDGAVQSASQEVTNLR	2	1	Q5FWS6
Pre-frontal cortex	Streptozocin	0	GNVASLIMTGLQGR	1	1	ENSRNOT00000009900
Pre-frontal cortex	Streptozocin	0	VPMITPDLESGVK	1	1	ENSRNOT00000009900
Pre-frontal cortex	Streptozocin	0	SVPTWLK	10	1	P62278
Pre-frontal cortex	Streptozocin	0	NM[15.9949]ITGTSQADCAVLIVAAGVGEFEAGISK	72	2	P62630,P62632
Pre-frontal cortex	Streptozocin	0	ADPPQEAAQFTSQVIILNHPGQISAGYSPVIDCHTAHIACK	23	1	P62632
Pre-frontal cortex	Streptozocin	0	VETGILRPGM[15.9949]VVTFAPVNITTEVK	2	1	P62632
Pre-frontal cortex	Streptozocin	0	CVESFSQYPPLGR	23	1	P62632
Pre-frontal cortex	Streptozocin	0	TPNNPSCNTDLINR	13	5	ENSRNOT00000034969,ENSRNOT00000082161,ENSRNOT00000042914,ENSRNOT00000090240,P54290
Pre-frontal cortex	Streptozocin	0	MQEDLVTLAK	5	5	ENSRNOT00000034969,ENSRNOT00000082161,ENSRNOT00000042914,ENSRNOT00000090240,P54290
Pre-frontal cortex	Streptozocin	0	VFTFSVGQHNYDR	1	5	ENSRNOT00000034969,ENSRNOT00000082161,ENSRNOT00000042914,ENSRNOT00000090240,P54290
Pre-frontal cortex	Streptozocin	0	HVSTMANFLK	2	4	ENSRNOT00000017375,Q9JHL4-2,Q9JHL4-3,Q9JHL4-4
Pre-frontal cortex	Streptozocin	0	YAVLYQPLFDK	3	2	ENSRNOT00000005286,Q9Z2G8
Pre-frontal cortex	Streptozocin	0	ASLNGADIYSGCCTLK	16	2	ENSRNOT00000057034,ENSRNOT00000027494
Pre-frontal cortex	Streptozocin	0	SDALETLGFLNHY	7	4	ENSRNOT00000006710,ENSRNOT00000057034,ENSRNOT00000027494,F1LQ48-2
Pre-frontal cortex	Streptozocin	0	NPNGPYPYTLK	6	3	ENSRNOT00000057034,ENSRNOT00000027494,F1LQ48-2
Pre-frontal cortex	Streptozocin	0	FSTPEQAAK	1	3	ENSRNOT00000057034,ENSRNOT00000027494,F1LQ48-2
Pre-frontal cortex	Streptozocin	0	FDKDGNGYISAAELR	9	1	ENSRNOT00000064679
Pre-frontal cortex	Streptozocin	0	SESEVEEAAAIIAQRPDNPR	25	3	ENSRNOT00000019569,Q07266,Q07266-2
Pre-frontal cortex	Streptozocin	0	DEEEESQMK	1	3	ENSRNOT00000019569,Q07266,Q07266-2
Pre-frontal cortex	Streptozocin	0	IGLFGGAGVGK	14	2	ENSRNOT00000003965,P10719
Pre-frontal cortex	Streptozocin	0	PLNGFQSNGPGLQYK	3	9	ENSRNOT00000078583,ENSRNOT00000093147,ENSRNOT00000082793,ENSRNOT00000085979,ENSRNOT00000093241,ENSRNOT00000093255,P97686,P97686-2,P97686-3
Pre-frontal cortex	Streptozocin	0	SGEDLPMVAPGNVR	3	9	ENSRNOT00000078583,ENSRNOT00000093147,ENSRNOT00000082793,ENSRNOT00000085979,ENSRNOT00000093241,ENSRNOT00000093255,P97686,P97686-2,P97686-3
Pre-frontal cortex	Streptozocin	0	AQDGSNPLSLQDLIEK	13	4	ENSRNOT00000091367,ENSRNOT00000003072,Q9Z2Q1,Q9Z2Q1-2
Pre-frontal cortex	Streptozocin	0	LSSSFGNLDPFGTGQPLPPLQIPQQTSQHSIVLPLK	8	4	ENSRNOT00000091367,ENSRNOT00000003072,Q9Z2Q1,Q9Z2Q1-2
Pre-frontal cortex	Streptozocin	0	PIPGNWNGAGCHTNF	16	1	ENSRNOT00000075480
Pre-frontal cortex	Streptozocin	0	ACLYAGIK	18	1	ENSRNOT00000075480
Pre-frontal cortex	Streptozocin	0	CIEEAIDK	12	1	ENSRNOT00000075480
Pre-frontal cortex	Streptozocin	0	PAQWEFQIGPCEGIR	1	1	ENSRNOT00000075480
Pre-frontal cortex	Streptozocin	0	TPEFLR	11	1	ENSRNOT00000027305
Pre-frontal cortex	Streptozocin	0	YESYTWR	2	2	ENSRNOT00000027305,ENSRNOT00000039633
Pre-frontal cortex	Streptozocin	0	STFVLDEFK	1	2	ENSRNOT00000027305,ENSRNOT00000039633
Pre-frontal cortex	Streptozocin	0	SCNLITGMFQR	1	2	ENSRNOT00000027305,ENSRNOT00000039633
Pre-frontal cortex	Streptozocin	0	DDGTWGTEQR	4	1	ENSRNOT00000013538
Pre-frontal cortex	Streptozocin	0	LPDGHEFK	1	1	ENSRNOT00000013538
Pre-frontal cortex	Streptozocin	0	GTFCSFDTPDEAIR	13	1	P50554
Pre-frontal cortex	Streptozocin	0	IFNTWLGDPSK	12	1	P50554
Pre-frontal cortex	Streptozocin	0	VDFEFDYDGPLM[15.9949]K	2	1	P50554
Pre-frontal cortex	Streptozocin	0	PALGILPPENFVDK	28	1	P50554
Pre-frontal cortex	Streptozocin	0	LTEPAPVPIHK	9	1	P69735
Pre-frontal cortex	Streptozocin	0	ESTDEILGR	1	1	P69735
Pre-frontal cortex	Streptozocin	0	NNGAGYFLEHLAFK	8	1	Q68FY0
Pre-frontal cortex	Streptozocin	0	IEEVDAQMVR	6	1	Q68FY0
Pre-frontal cortex	Streptozocin	0	IADISQVYTQNAEMR	15	2	ENSRNOT00000084062,ENSRNOT00000009666
Pre-frontal cortex	Streptozocin	0	CNTQQPGCENVCYDK	8	1	ENSRNOT00000001054
Pre-frontal cortex	Streptozocin	0	EREEFYR	1	1	ENSRNOT00000012101
Pre-frontal cortex	Streptozocin	0	SQVDHVIWPDGK	20	3	ENSRNOT00000079993,ENSRNOT00000066501,ENSRNOT00000025165
Pre-frontal cortex	Streptozocin	0	YKQDVYLLPK	24	3	ENSRNOT00000079993,ENSRNOT00000066501,ENSRNOT00000025165
Pre-frontal cortex	Streptozocin	0	ALGAIVYITEIDPICALQACM[15.9949]DGFR	2	2	ENSRNOT00000079993,ENSRNOT00000066501
Pre-frontal cortex	Streptozocin	0	LIAQDNEPEKPVADSETK	5	6	ENSRNOT00000035821,ENSRNOT00000085599,ENSRNOT00000022319,ENSRNOT00000077790,P24942,P24942-2
Pre-frontal cortex	Streptozocin	0	IAQDNEPEKPVADSETK	2	6	ENSRNOT00000035821,ENSRNOT00000085599,ENSRNOT00000022319,ENSRNOT00000077790,P24942,P24942-2
Pre-frontal cortex	Streptozocin	0	LGHGLLSGEYSKPALESGDGEQVPEQK	7	1	ENSRNOT00000020785
Pre-frontal cortex	Streptozocin	0	QQDAQEFFLHLINMVER	29	1	ENSRNOT00000020785
Pre-frontal cortex	Streptozocin	0	IGEWELIQESGVPLKPL	2	1	ENSRNOT00000020785
Pre-frontal cortex	Streptozocin	0	LGHGLLSGEYSK	12	1	ENSRNOT00000020785
Pre-frontal cortex	Streptozocin	0	NLGNSCYLNSVVQVLF	6	1	ENSRNOT00000020785
Pre-frontal cortex	Streptozocin	0	FSSPTSPMLDESVVIQLVEMGFPMDACR	1	1	ENSRNOT00000020785
Pre-frontal cortex	Streptozocin	0	LDCPFFGSPIPTLR	5	5	ENSRNOT00000051512,ENSRNOT00000044972,ENSRNOT00000060871,P97685-2,P97685-3
Pre-frontal cortex	Streptozocin	0	FHFTHTIQQK	13	5	ENSRNOT00000051512,ENSRNOT00000044972,ENSRNOT00000060871,P97685-2,P97685-3
Pre-frontal cortex	Streptozocin	0	FFNIAK	4	5	ENSRNOT00000051512,ENSRNOT00000044972,ENSRNOT00000060871,P97685-2,P97685-3
Pre-frontal cortex	Streptozocin	0	GLCGAIHSSVAK	22	3	ENSRNOT00000064802,ENSRNOT00000041346,P35435
Pre-frontal cortex	Streptozocin	0	TNELGDAGVGLVLQGLQNPTCK	18	3	ENSRNOT00000091292,ENSRNOT00000022241,P29315
Pre-frontal cortex	Streptozocin	0	LSLQNCSLTEAGCGVLPDVLR	3	3	ENSRNOT00000091292,ENSRNOT00000022241,P29315
Pre-frontal cortex	Streptozocin	0	VETISSGDGR	3	1	ENSRNOT00000012608
Pre-frontal cortex	Streptozocin	0	DQSGEYECSALNDVAAPDVR	20	2	P32736,P32736-2
Pre-frontal cortex	Streptozocin	0	EGQGFVSEDEYLEISDIKR	6	2	P32736,P32736-2
Pre-frontal cortex	Streptozocin	0	KEWDLKPVADR	12	6	ENSRNOT00000088766,ENSRNOT00000092026,ENSRNOT00000079516,ENSRNOT00000090593,ENSRNOT00000080108,P0C2X9
Pre-frontal cortex	Streptozocin	0	TAEGQALSEAR	12	3	ENSRNOT00000004776,ENSRNOT00000092172,Q5FVJ0-2
Pre-frontal cortex	Streptozocin	0	SQALEFPDQPDIAEDLK	3	3	ENSRNOT00000001774,O88831,O88831-2
Pre-frontal cortex	Streptozocin	0	EDNEGVFNGSWGGR	11	1	ENSRNOT00000020325
Pre-frontal cortex	Streptozocin	0	VGNPWDPNILYGPLHTK	23	1	ENSRNOT00000020325
Pre-frontal cortex	Streptozocin	0	IGGDAGTSLNSNDYGYGGQK	10	2	ENSRNOT00000066199,Q32PX7
Pre-frontal cortex	Streptozocin	0	DLIADLK	2	3	ENSRNOT00000014464,ENSRNOT00000059724,P48037
Pre-frontal cortex	Streptozocin	0	TALVANTSNM[15.9949]PVAAR	8	2	ENSRNOT00000078007,ENSRNOT00000093467
Pre-frontal cortex	Streptozocin	0	TVGMLSNMISFYDMAR	14	2	ENSRNOT00000078007,ENSRNOT00000093467
Pre-frontal cortex	Streptozocin	0	IAPPGNYDASDVVLELEFEGVK	26	2	ENSRNOT00000078007,ENSRNOT00000093467
Pre-frontal cortex	Streptozocin	0	ASIYTGITLSEYFR	11	2	ENSRNOT00000078007,ENSRNOT00000093467
Pre-frontal cortex	Streptozocin	0	FTEFVPLR	12	2	ENSRNOT00000078007,ENSRNOT00000093467
Pre-frontal cortex	Streptozocin	0	IKADYAQLLEDMQNAFR	12	2	ENSRNOT00000078007,ENSRNOT00000093467
Pre-frontal cortex	Streptozocin	0	VFLLGEEVAQYDGAYK	43	2	ENSRNOT00000083212,P49432
Pre-frontal cortex	Streptozocin	0	EGIECEVINLR	12	2	ENSRNOT00000083212,P49432
Pre-frontal cortex	Streptozocin	0	DDNPVVMLENELM[15.9949]YGVAFELPTEAQSK	18	2	ENSRNOT00000083212,P49432
Pre-frontal cortex	Streptozocin	0	DDNPVVM[15.9949]LENELMYGVAFELPTEAQSK	12	2	ENSRNOT00000083212,P49432
Pre-frontal cortex	Streptozocin	0	DFLIPIGK	13	2	ENSRNOT00000083212,P49432
Pre-frontal cortex	Streptozocin	0	TIGTGLVTDVPAMTEEDK	15	1	P85834
Pre-frontal cortex	Streptozocin	0	GITINAAHVEYSTAAR	20	1	P85834
Pre-frontal cortex	Streptozocin	0	KPHVNVGTIGHVDHGK	1	1	P85834
Pre-frontal cortex	Streptozocin	0	DLIHDQDEEEEEEEGQR	34	1	ENSRNOT00000090211
Pre-frontal cortex	Streptozocin	0	GEAAAERPGEAAVASSPSK	22	2	ENSRNOT00000000707,P30009
Pre-frontal cortex	Streptozocin	0	FRDVPDFRVLACGGDGTVGWILDCIEK	1	2	ENSRNOT00000063874,P49621
Pre-frontal cortex	Streptozocin	0	FVLHAVQLVK	20	1	Q64560
Pre-frontal cortex	Streptozocin	0	GNSSMDSTAGCSGTPPICR	2	3	ENSRNOT00000046262,ENSRNOT00000089538,P97526
Pre-frontal cortex	Streptozocin	0	ENLEETLQLEIENCKEEIASISSLK	24	2	ENSRNOT00000041443,O35550
Pre-frontal cortex	Streptozocin	0	GMATCFAYGQTGSGK	14	4	ENSRNOT00000019189,Q9WV63,Q9WV63-2,Q5XI51
Pre-frontal cortex	Streptozocin	0	GSLDYRPLTTADPIDEHR	22	3	ENSRNOT00000019189,Q9WV63,Q9WV63-2
Pre-frontal cortex	Streptozocin	0	MSTEEIVQR	10	2	ENSRNOT00000015757,Q63569
Pre-frontal cortex	Streptozocin	0	TPAASEAPSSAAK	6	2	ENSRNOT00000073915,Q05175
Pre-frontal cortex	Streptozocin	0	ITLNNVGHLR	1	5	ENSRNOT00000084567,ENSRNOT00000067840,Q9R080-2,Q9R080-3,Q9R080-4
Pre-frontal cortex	Streptozocin	0	IGIVGGCQEYTGAPYFAGISALK	25	2	ENSRNOT00000065043,D4AAT7
Pre-frontal cortex	Streptozocin	0	LQMAIEESKR	18	2	ENSRNOT00000021286,O88339
Pre-frontal cortex	Streptozocin	0	EQSPYVVQSIISLIMGVK	6	2	ENSRNOT00000041365,ENSRNOT00000075920
Pre-frontal cortex	Streptozocin	0	MADGTCQDAAIVGYK	5	1	ENSRNOT00000005370
Pre-frontal cortex	Streptozocin	0	AYIDSLMADGTCQDAAIVGYK	10	1	ENSRNOT00000005370
Pre-frontal cortex	Streptozocin	0	STGGAPTFNVTVTMTAK	30	1	ENSRNOT00000005370
Pre-frontal cortex	Streptozocin	0	DSPSVWAAVPGK	1	1	ENSRNOT00000005370
Pre-frontal cortex	Streptozocin	0	EGVHGGLINK	7	1	ENSRNOT00000005370
Pre-frontal cortex	Streptozocin	0	CEVQHGIDDSSDAVEVK	26	4	ENSRNOT00000025496,ENSRNOT00000083116,P55068,P55068-2
Pre-frontal cortex	Streptozocin	0	YPIQNPR	12	4	ENSRNOT00000025496,ENSRNOT00000083116,P55068,P55068-2
Pre-frontal cortex	Streptozocin	0	LEAFLTQK	12	2	ENSRNOT00000027272,Q01986
Pre-frontal cortex	Streptozocin	0	DVKPSNILVN	8	2	ENSRNOT00000027272,Q01986
Pre-frontal cortex	Streptozocin	0	YNEFAEVFLK	6	1	ENSRNOT00000014002
Pre-frontal cortex	Streptozocin	0	FDVFEDFISPTTAAQTLLFTACSK	6	1	ENSRNOT00000014002
Pre-frontal cortex	Streptozocin	0	AYLQQLR	7	1	ENSRNOT00000011499
Pre-frontal cortex	Streptozocin	0	DLQQYQSQAK	12	1	Q4KM74
Pre-frontal cortex	Streptozocin	0	LAFAYLEDLHSEFDEQHGK	6	1	Q4KM74
Pre-frontal cortex	Streptozocin	0	IALSLMDQPELFQAANLGDLDVLLR	12	2	ENSRNOT00000015200,Q925N3
Pre-frontal cortex	Streptozocin	0	PLAGGEPVSLGSLR	12	2	ENSRNOT00000073247,P04041
Pre-frontal cortex	Streptozocin	0	FLVGPDGVPVR	14	2	ENSRNOT00000073247,P04041
Pre-frontal cortex	Streptozocin	0	QDMSISLAALELLSGLAK	4	3	ENSRNOT00000088748,ENSRNOT00000020556,P86410
Pre-frontal cortex	Streptozocin	0	SVLVIIDVKPK	14	1	ENSRNOT00000019104
Pre-frontal cortex	Streptozocin	0	NAETCNATGPDLEFSMHDGTIR	13	1	ENSRNOT00000055862
Pre-frontal cortex	Streptozocin	0	SGVINGLFSDDMLFLR	8	1	ENSRNOT00000055862
Pre-frontal cortex	Streptozocin	0	VHCFEEVCVMVAEFIPADR	7	1	ENSRNOT00000055862
Pre-frontal cortex	Streptozocin	0	LTHDTSNIHTSTPR	13	1	ENSRNOT00000055862
Pre-frontal cortex	Streptozocin	0	VVGTTFHGTGSAVASVAVDPSGR	1	1	ENSRNOT00000055862
Pre-frontal cortex	Streptozocin	0	IQSSNLETAMSVIGDR	1	1	ENSRNOT00000021091
Pre-frontal cortex	Streptozocin	0	AEHSFAGVPCGIMDQLIALLGQK	24	1	ENSRNOT00000008525
Pre-frontal cortex	Streptozocin	0	MEELEAGR	1	1	ENSRNOT00000008525
Pre-frontal cortex	Streptozocin	0	TNLYQDDAVTGEAAGLALGLVMLGSK	38	3	ENSRNOT00000089470,ENSRNOT00000024306,O88761
Pre-frontal cortex	Streptozocin	0	QAIGIALETR	14	3	ENSRNOT00000089470,ENSRNOT00000024306,O88761
Pre-frontal cortex	Streptozocin	0	VSTAVLSITAK	1	3	ENSRNOT00000089470,ENSRNOT00000024306,O88761
Pre-frontal cortex	Streptozocin	0	TPEQCPSVVSLLSESYNPHVR	31	3	ENSRNOT00000089470,ENSRNOT00000024306,O88761
Pre-frontal cortex	Streptozocin	0	LTALER	3	1	ENSRNOT00000013600
Pre-frontal cortex	Streptozocin	0	PAFIPVPSAVVQAIFGR	41	1	ENSRNOT00000064643
Pre-frontal cortex	Streptozocin	0	SWPEGHFATITLTFIDK	13	1	ENSRNOT00000075425
Pre-frontal cortex	Streptozocin	0	YYFEGIK	12	1	ENSRNOT00000075425
Pre-frontal cortex	Streptozocin	0	AVGIYISTLK	6	1	ENSRNOT00000075425
Pre-frontal cortex	Streptozocin	0	AFVTQDIQLYHNLVMK	1	1	ENSRNOT00000081123
Pre-frontal cortex	Streptozocin	0	HLSVVTLAAK	12	2	ENSRNOT00000022874,ENSRNOT00000038281
Pre-frontal cortex	Streptozocin	0	VSALTQMESACVSIHEALK	7	1	ENSRNOT00000004942
Pre-frontal cortex	Streptozocin	0	TIAITGLAANLDR	2	2	ENSRNOT00000051155,Q9Z1A6
Pre-frontal cortex	Streptozocin	0	VVAEEFR	3	1	ENSRNOT00000074357
Pre-frontal cortex	Streptozocin	0	VNADALR	1	1	ENSRNOT00000074357
Pre-frontal cortex	Streptozocin	0	FAELVYTGFWHSPECEFVR	17	1	P09034
Pre-frontal cortex	Streptozocin	0	FNIPFLQLQR	2	1	ENSRNOT00000065410
Pre-frontal cortex	Streptozocin	0	SFFDELR	10	6	ENSRNOT00000027677,ENSRNOT00000084530,ENSRNOT00000077612,ENSRNOT00000003867,P18266,P18265
Pre-frontal cortex	Streptozocin	0	ASNFRSNFGYNIPLK	1	2	ENSRNOT00000075868,ENSRNOT00000010753
Pre-frontal cortex	Streptozocin	0	IGIGELITR	15	2	ENSRNOT00000003687,ENSRNOT00000092478
Pre-frontal cortex	Streptozocin	0	QELVDAFVEHR	2	2	ENSRNOT00000003687,ENSRNOT00000092478
Pre-frontal cortex	Streptozocin	0	GNVLLHEMQIQHPTASIIAK	4	2	ENSRNOT00000009944,ENSRNOT00000001227
Pre-frontal cortex	Streptozocin	0	LLLPDMIK	5	2	ENSRNOT00000065558,ENSRNOT00000080934
Pre-frontal cortex	Streptozocin	0	VDIDVPDVDVQGPDWHLK	4	2	ENSRNOT00000088387,ENSRNOT00000079456
Pre-frontal cortex	Streptozocin	0	ISMPDIDLHLK	2	2	ENSRNOT00000088387,ENSRNOT00000079456
Pre-frontal cortex	Streptozocin	0	VDVDVPDVDVQGPDWHLK	1	2	ENSRNOT00000088387,ENSRNOT00000079456
Pre-frontal cortex	Streptozocin	0	ELHAHLLAQDK	1	2	ENSRNOT00000016954,P18886
Pre-frontal cortex	Streptozocin	0	LCYYIGATDDAATK	5	1	ENSRNOT00000019107
Pre-frontal cortex	Streptozocin	0	LGVNDCVLR	10	4	ENSRNOT00000003741,ENSRNOT00000088114,ENSRNOT00000076057,Q62936-2
Pre-frontal cortex	Streptozocin	0	MILIPGQTLPLQLSHPQEVSMVR	14	1	ENSRNOT00000008873
Pre-frontal cortex	Streptozocin	0	LATQLTGPVMPIR	14	2	ENSRNOT00000001163,P41123
Pre-frontal cortex	Streptozocin	0	AELEQHLEQEQEFQVNK	4	1	ENSRNOT00000032159
Pre-frontal cortex	Streptozocin	0	AVLWVSADGLR	5	5	ENSRNOT00000049481,ENSRNOT00000013026,ENSRNOT00000042594,Q2LC84,Q2LC84-2
Pre-frontal cortex	Streptozocin	0	ISGWTQALPDMVVSHLFGK	28	1	Q6JE36
Pre-frontal cortex	Streptozocin	0	LEDTLWAGLTDQHVK	13	3	ENSRNOT00000067018,ENSRNOT00000085601,P13437
Pre-frontal cortex	Streptozocin	0	VQEDLEAEFQSLTSVLEELR	27	1	ENSRNOT00000072830
Pre-frontal cortex	Streptozocin	0	ISNDPSPGYNIEQMAK	1	1	ENSRNOT00000012790
Pre-frontal cortex	Streptozocin	0	IIIEDLLEATR	11	1	ENSRNOT00000001517
Pre-frontal cortex	Streptozocin	0	ALCDPLEEVR	3	1	ENSRNOT00000001517
Pre-frontal cortex	Streptozocin	0	VLQEALCVISGVPGLK	1	1	ENSRNOT00000001517
Pre-frontal cortex	Streptozocin	0	LVFLGLDNAGK	2	2	ENSRNOT00000006567,ENSRNOT00000000673
Pre-frontal cortex	Streptozocin	0	AVGDIPGVR	1	2	ENSRNOT00000042496,ENSRNOT00000022348
Pre-frontal cortex	Streptozocin	0	HDDYLVMLK	4	2	ENSRNOT00000092002,ENSRNOT00000049255
Pre-frontal cortex	Streptozocin	0	GISAFLVPMPTPGLTLGK	12	2	ENSRNOT00000001556,P15651
Pre-frontal cortex	Streptozocin	0	VAVVLIQK	1	2	ENSRNOT00000018969,ENSRNOT00000079466
Pre-frontal cortex	Streptozocin	0	GYGFIEYEK	12	3	ENSRNOT00000056481,Q9WV25,Q9WV25-2
Pre-frontal cortex	Streptozocin	0	YASILMGISNGVGTLSGMVCPIIVGAMTK	45	5	ENSRNOT00000028064,ENSRNOT00000022383,Q7TSF2,Q62634-2,Q9JI12
Pre-frontal cortex	Streptozocin	0	GPLGPNWK	5	5	ENSRNOT00000052202,ENSRNOT00000066892,ENSRNOT00000090554,ENSRNOT00000005368,P53812-2
Pre-frontal cortex	Streptozocin	0	LFCWIDK	7	5	ENSRNOT00000052202,ENSRNOT00000066892,ENSRNOT00000090554,ENSRNOT00000005368,P53812-2
Pre-frontal cortex	Streptozocin	0	INLFVGAEQLTNQDFLK	2	2	ENSRNOT00000048043,Q8CFG5
Pre-frontal cortex	Streptozocin	0	IDSDGDGLVTTEELK	14	1	ENSRNOT00000018074
Pre-frontal cortex	Streptozocin	0	GLQQELNR	2	1	ENSRNOT00000032704
Pre-frontal cortex	Streptozocin	0	GLGGMLFSR	1	1	ENSRNOT00000032704
Pre-frontal cortex	Streptozocin	0	HAHLTDTEIMTLVDETNMYEGVGR	2	1	ENSRNOT00000025353
Pre-frontal cortex	Streptozocin	0	MFILQSK	7	1	ENSRNOT00000025353
Pre-frontal cortex	Streptozocin	0	STSESFIQHIVSLVHHVK	3	3	ENSRNOT00000078589,ENSRNOT00000088025,ENSRNOT00000089966
Pre-frontal cortex	Streptozocin	0	VLVIGAGGLGCELLK	8	2	ENSRNOT00000084052,ENSRNOT00000008893
Pre-frontal cortex	Streptozocin	0	NLALSGFR	1	2	ENSRNOT00000084052,ENSRNOT00000008893
Pre-frontal cortex	Streptozocin	0	LDQEEAQYQR	12	1	Q91XJ1
Pre-frontal cortex	Streptozocin	0	AVLPVAESFGFADEIR	3	1	ENSRNOT00000047408
Pre-frontal cortex	Streptozocin	0	IHNLITDFLAFMPMK	12	1	ENSRNOT00000014832
Pre-frontal cortex	Streptozocin	0	VLDMPTQELGLPAYR	1	1	ENSRNOT00000027166
Pre-frontal cortex	Streptozocin	0	ELAGIVGSLNSENK	3	1	ENSRNOT00000020077
Pre-frontal cortex	Streptozocin	0	IGSDVELLLR	4	2	ENSRNOT00000075311,ENSRNOT00000037907
Pre-frontal cortex	Streptozocin	0	LGCLIWEVFNGSLPR	2	2	ENSRNOT00000093065,ENSRNOT00000032387
Pre-frontal cortex	Streptozocin	0	VLPQLLTAFEFGNAGAVVLTPLFK	1	2	ENSRNOT00000093065,ENSRNOT00000032387
Pre-frontal cortex	Streptozocin	0	FLSAEEYQQK	2	2	ENSRNOT00000093065,ENSRNOT00000032387
Pre-frontal cortex	Streptozocin	0	VFLPSHSLDAVSPTDVLLCFELLSPELAK	3	3	ENSRNOT00000085038,ENSRNOT00000074772,Q6J1Y9
Pre-frontal cortex	Streptozocin	0	YGVNQLEEMLRPLVEAGLR	15	2	ENSRNOT00000076837,ENSRNOT00000020625
Pre-frontal cortex	Streptozocin	0	LLGLAELLR	2	1	ENSRNOT00000009779
Pre-frontal cortex	Streptozocin	0	DYETATLSDIK	6	3	ENSRNOT00000090402,ENSRNOT00000027773,ENSRNOT00000089305
Pre-frontal cortex	Streptozocin	0	DDPVTNLNNAFEVAEK	4	3	ENSRNOT00000090402,ENSRNOT00000027773,ENSRNOT00000089305
Pre-frontal cortex	Streptozocin	0	AIMTYVSCFYHAFSGAQK	3	1	ENSRNOT00000090402
Pre-frontal cortex	Streptozocin	0	SGAGNIAAATGLVK	10	1	Q63754
Pre-frontal cortex	Streptozocin	0	EQASHLGGAVF	17	1	Q63754
Pre-frontal cortex	Streptozocin	0	FTELVCSLSDIYQMER	3	2	ENSRNOT00000030007,P70600-3
Pre-frontal cortex	Streptozocin	0	CWDYDPSDRPR	7	2	ENSRNOT00000030007,P70600-3
Pre-frontal cortex	Streptozocin	0	ILEPTAFQEPPPKPSRPK	2	2	ENSRNOT00000030007,P70600-3
Pre-frontal cortex	Streptozocin	0	RPGGPQYGVAR	2	2	ENSRNOT00000030007,P70600-3
Pre-frontal cortex	Streptozocin	0	KEPVPDDSDLDRK	19	4	ENSRNOT00000013184,Q63100,Q63100-3,Q63100-4
Pre-frontal cortex	Streptozocin	0	GSETGSETHESDLAPSDK	1	3	ENSRNOT00000092322,ENSRNOT00000092646,ENSRNOT00000001133
Pre-frontal cortex	Streptozocin	0	TPIILVGTK	5	5	ENSRNOT00000087094,ENSRNOT00000092558,ENSRNOT00000009994,ENSRNOT00000073886,Q6RUV5
Pre-frontal cortex	Streptozocin	0	LDLRDDKDTIEK	2	4	ENSRNOT00000087094,ENSRNOT00000092558,ENSRNOT00000009994,Q6RUV5
Pre-frontal cortex	Streptozocin	0	AVIFCLSADK	10	1	ENSRNOT00000007794
Pre-frontal cortex	Streptozocin	0	HLQLEQGVENYEESIAQLSR	4	1	ENSRNOT00000077651
Pre-frontal cortex	Streptozocin	0	GGQEEYVLSYEPVNQQEVNYTR	1	3	ENSRNOT00000078737,ENSRNOT00000058885,Q62696
Pre-frontal cortex	Streptozocin	0	VNDDLISEFPDK	13	3	ENSRNOT00000078737,ENSRNOT00000058885,Q62696
Pre-frontal cortex	Streptozocin	0	ALHLLEEYR	4	3	ENSRNOT00000078737,ENSRNOT00000058885,Q62696
Pre-frontal cortex	Streptozocin	0	QVTPDGESDEVGVIPSKR	1	3	ENSRNOT00000078737,ENSRNOT00000058885,Q62696
Pre-frontal cortex	Streptozocin	0	LCGDLMNCLHER	14	6	ENSRNOT00000067913,ENSRNOT00000013398,Q9QY17,Q9QY17-2,Q9QY17-3,Q9QY17-4
Pre-frontal cortex	Streptozocin	0	YNAELESGNQFVLYR	10	1	P01048
Pre-frontal cortex	Streptozocin	0	EIPVDSPELK	4	1	P01048
Pre-frontal cortex	Streptozocin	0	GQEEQSPGLEDKDLDFK	3	1	Q64548
Pre-frontal cortex	Streptozocin	0	NYLEPGK	1	1	P11507
Pre-frontal cortex	Streptozocin	0	SVLTWLLR	6	5	ENSRNOT00000036061,ENSRNOT00000078830,O88658,O88658-2,O88658-3
Pre-frontal cortex	Streptozocin	0	EHPLLGPYVEDLSK	6	5	ENSRNOT00000036061,ENSRNOT00000078830,O88658,O88658-2,O88658-3
Pre-frontal cortex	Streptozocin	0	GDLETQTQLEHAR	25	3	ENSRNOT00000091328,ENSRNOT00000033200,O55156
Pre-frontal cortex	Streptozocin	0	DALDQAQQVER	2	3	ENSRNOT00000091328,ENSRNOT00000033200,O55156
Pre-frontal cortex	Streptozocin	0	VLLLEANR	8	3	ENSRNOT00000091328,ENSRNOT00000033200,O55156
Pre-frontal cortex	Streptozocin	0	SYLTPVRDEESESQR	1	7	ENSRNOT00000041473,ENSRNOT00000080285,ENSRNOT00000006773,ENSRNOT00000050037,Q10728,Q10728-2,Q10728-3
Pre-frontal cortex	Streptozocin	0	KVVGCSCVVVK	23	2	ENSRNOT00000022184,P63324
Pre-frontal cortex	Streptozocin	0	KEIHTVPDMGK	8	1	ENSRNOT00000024914
Pre-frontal cortex	Streptozocin	0	EESQQLEEELESLEER	1	1	ENSRNOT00000086899
Pre-frontal cortex	Streptozocin	0	IVNGWQVEEADDWLR	26	2	ENSRNOT00000010157,P53534
Pre-frontal cortex	Streptozocin	0	HLDHVAALFPGDVDR	27	2	ENSRNOT00000010157,P53534
Pre-frontal cortex	Streptozocin	0	VEDVEALDQK	9	2	ENSRNOT00000010157,P53534
Pre-frontal cortex	Streptozocin	0	WPVSMFEK	12	2	ENSRNOT00000010157,P53534
Pre-frontal cortex	Streptozocin	0	DFYELEPEK	6	2	ENSRNOT00000010157,P53534
Pre-frontal cortex	Streptozocin	0	ALGIGVYPVR	4	1	ENSRNOT00000025084
Pre-frontal cortex	Streptozocin	0	VHFPEALGHVALR	2	1	ENSRNOT00000025084
Pre-frontal cortex	Streptozocin	0	TVDISLILSEAIR	11	2	ENSRNOT00000013573,Q63468
Pre-frontal cortex	Streptozocin	0	TAM[15.9949]NVNEIFMAIAK	7	1	ENSRNOT00000030344
Pre-frontal cortex	Streptozocin	0	IINEPTAAAIAYGLDR	3	2	P0DMW0,P0DMW1
Pre-frontal cortex	Streptozocin	0	NALESYAFNMK	1	3	ENSRNOT00000074223,P0DMW0,P0DMW1
Pre-frontal cortex	Streptozocin	0	GAVVGIDLGTTNSCVAVMEGK	4	2	ENSRNOT00000026696,P48721
Pre-frontal cortex	Streptozocin	0	TTPSVVAFTPDGER	13	2	ENSRNOT00000026696,P48721
Pre-frontal cortex	Streptozocin	0	EQQIVIQSSGGLSK	18	2	ENSRNOT00000026696,P48721
Pre-frontal cortex	Streptozocin	0	EQQIVIQSSGGLSKDDIENMVK	4	2	ENSRNOT00000026696,P48721
Pre-frontal cortex	Streptozocin	0	SLQLVVLDADTINHPAQLIK	1	2	D4A055,D4A055-1
Pre-frontal cortex	Streptozocin	0	GVTEAIQNFSFR	13	2	ENSRNOT00000091980,ENSRNOT00000012545
Pre-frontal cortex	Streptozocin	0	EGGAGAVDEDDFIK	13	2	ENSRNOT00000091980,ENSRNOT00000012545
Pre-frontal cortex	Streptozocin	0	KEDGDTVCSGPGMSDPR	18	2	ENSRNOT00000091980,ENSRNOT00000012545
Pre-frontal cortex	Streptozocin	0	SQEDMSEPLKR	9	2	ENSRNOT00000091980,ENSRNOT00000012545
Pre-frontal cortex	Streptozocin	0	VVINISGLR	8	3	ENSRNOT00000092450,P15384,P10499
Pre-frontal cortex	Streptozocin	0	GYWASLDASTQTTHELTIPNNLIGCIIGR	29	1	ENSRNOT00000023806
Pre-frontal cortex	Streptozocin	0	LVVPATQCGSLIGK	14	1	ENSRNOT00000023806
Pre-frontal cortex	Streptozocin	0	MHGGTGFAGIDSSSPEVK	7	1	ENSRNOT00000023806
Pre-frontal cortex	Streptozocin	0	PGPLSSQGAPVDTQPAAQK	14	8	ENSRNOT00000052033,ENSRNOT00000065535,Q62910,Q62910-2,Q62910-3,Q62910-4,Q62910-5,Q62910-6
Pre-frontal cortex	Streptozocin	0	TLEEEMSLEK	13	8	ENSRNOT00000052033,ENSRNOT00000065535,Q62910,Q62910-2,Q62910-3,Q62910-4,Q62910-5,Q62910-6
Pre-frontal cortex	Streptozocin	0	IQESEVFR	13	6	ENSRNOT00000052033,ENSRNOT00000065535,Q62910,Q62910-2,Q62910-4,Q62910-5
Pre-frontal cortex	Streptozocin	0	ALLTTGSLR	9	8	ENSRNOT00000052033,ENSRNOT00000065535,Q62910,Q62910-2,Q62910-3,Q62910-4,Q62910-5,Q62910-6
Pre-frontal cortex	Streptozocin	0	PGIVELPTLEELKVEEVK	3	1	ENSRNOT00000084069
Pre-frontal cortex	Streptozocin	0	VPLPSEILGPVDQYLGVPYAAPPIGEK	3	7	ENSRNOT00000076168,ENSRNOT00000005102,ENSRNOT00000005077,Q62889,Q62889-2,Q62889-3,Q62889-4
Pre-frontal cortex	Streptozocin	0	GIIAILDDACM[15.9949]NVGKVTDGMFLEALNSK	1	1	ENSRNOT00000004609
Pre-frontal cortex	Streptozocin	0	FNEEGALSVLQQFK	2	1	ENSRNOT00000015971
Pre-frontal cortex	Streptozocin	0	QDFNMMEQK	12	4	ENSRNOT00000018340,ENSRNOT00000018073,Q63028,Q63028-2
Pre-frontal cortex	Streptozocin	0	VDENNPEYLRER	1	4	ENSRNOT00000018340,ENSRNOT00000018073,Q63028,Q63028-2
Pre-frontal cortex	Streptozocin	0	VEQDLAMGTDAEGEK	32	2	ENSRNOT00000021178,P61765-2
Pre-frontal cortex	Streptozocin	0	REPLPSLEAVYLITPSEK	30	2	ENSRNOT00000021178,P61765-2
Pre-frontal cortex	Streptozocin	0	TLTEINIAFLPYESQVYSLDSADSFQSFYSPHK	47	2	ENSRNOT00000021178,P61765-2
Pre-frontal cortex	Streptozocin	0	IILLYIFLK	14	2	ENSRNOT00000021178,P61765-2
Pre-frontal cortex	Streptozocin	0	STHLHLAEDCMK	4	2	ENSRNOT00000021178,P61765-2
Pre-frontal cortex	Streptozocin	0	IVVLLQR	4	5	ENSRNOT00000025887,ENSRNOT00000020717,ENSRNOT00000091336,Q9ES67,Q63797
Pre-frontal cortex	Streptozocin	0	QVVTLLNELK	1	3	ENSRNOT00000045049,P21775,P07871
Pre-frontal cortex	Streptozocin	0	VNPLGGAIALGHPLGCTGAR	5	3	ENSRNOT00000045049,P21775,P07871
Pre-frontal cortex	Streptozocin	0	ILGGDEPGQPILIGAVIAMGSADR	1	4	ENSRNOT00000066643,O88382,O88382-2,O88382-3
Pre-frontal cortex	Streptozocin	0	AVGFVSEDEYLEIQGITR	18	2	ENSRNOT00000035454,Q62718
Pre-frontal cortex	Streptozocin	0	GGGGPGGGGPGGGGASGGPSQPPGGGGPGIR	8	1	Q99PF5
Pre-frontal cortex	Streptozocin	0	QMLEALNFLHGK	1	3	ENSRNOT00000047011,ENSRNOT00000080404,E9PTG8
Pre-frontal cortex	Streptozocin	0	PVASPSAHNISSSSGAPDR	1	2	ENSRNOT00000028763,ENSRNOT00000091990
Pre-frontal cortex	Streptozocin	0	ITLEDLEQLK	1	1	ENSRNOT00000070812
Pre-frontal cortex	Streptozocin	0	LNLYELK	13	1	ENSRNOT00000086608
Pre-frontal cortex	Streptozocin	0	GVMGGQSAGPQHTEAETIQK	16	1	ENSRNOT00000003277
Pre-frontal cortex	Streptozocin	0	VTNLHLMLQLVR	19	1	ENSRNOT00000003277
Pre-frontal cortex	Streptozocin	0	VASSTLLDDR	1	1	ENSRNOT00000003277
Pre-frontal cortex	Streptozocin	0	LLTSILK	13	1	ENSRNOT00000003277
Pre-frontal cortex	Streptozocin	0	TVIENLR	1	1	ENSRNOT00000003277
Pre-frontal cortex	Streptozocin	0	YLLYKPTFSQLYTFLAASFK	4	1	ENSRNOT00000039410
Pre-frontal cortex	Streptozocin	0	FIVVCLLLNK	5	1	ENSRNOT00000039410
Pre-frontal cortex	Streptozocin	0	PASVPHGAGYDVLIQK	2	2	ENSRNOT00000085117,Q6I7R3
Pre-frontal cortex	Streptozocin	0	LATTVSAPDLK	12	3	ENSRNOT00000056161,ENSRNOT00000056166,Q5M7W5-2
Pre-frontal cortex	Streptozocin	0	ADLYSVESK	1	1	ENSRNOT00000029420
Pre-frontal cortex	Streptozocin	0	SNLVDNTNQVEVLQR	9	5	ENSRNOT00000087474,ENSRNOT00000091788,ENSRNOT00000084462,ENSRNOT00000024793,ENSRNOT00000082566
Pre-frontal cortex	Streptozocin	0	TFESLVDFCK	13	1	Q9WVK7
Pre-frontal cortex	Streptozocin	0	AADEFVEK	1	1	Q9WVK7
Pre-frontal cortex	Streptozocin	0	VALTYDHR	1	2	ENSRNOT00000007298,Q01205
Pre-frontal cortex	Streptozocin	0	LVASAEQLLK	10	1	ENSRNOT00000026968
Pre-frontal cortex	Streptozocin	0	FLTPDFTSLDVLTFAGSGIPAGINIPNYDDLR	1	1	ENSRNOT00000026968
Pre-frontal cortex	Streptozocin	0	PALPYLDVDMMDICK	9	1	ENSRNOT00000091471
Pre-frontal cortex	Streptozocin	0	MIEDGEIFASINQK	1	1	ENSRNOT00000091471
Pre-frontal cortex	Streptozocin	0	ICYIFHETFGR	26	6	ENSRNOT00000002478,O35303-2,O35303-3,O35303-4,O35303-5,O35303-6
Pre-frontal cortex	Streptozocin	0	LQSELVGQLYK	1	6	ENSRNOT00000002478,O35303-2,O35303-3,O35303-4,O35303-5,O35303-6
Pre-frontal cortex	Streptozocin	0	QEIENETER	6	6	ENSRNOT00000002478,O35303-2,O35303-3,O35303-4,O35303-5,O35303-6
Pre-frontal cortex	Streptozocin	0	GPLLEEQALSK	5	2	ENSRNOT00000073403,ENSRNOT00000034950
Pre-frontal cortex	Streptozocin	0	AAEGGLSSPEFSELCIWLGSQIK	4	2	ENSRNOT00000073403,ENSRNOT00000034950
Pre-frontal cortex	Streptozocin	0	MACPYSVLVSGDIK	1	2	ENSRNOT00000073403,ENSRNOT00000034950
Pre-frontal cortex	Streptozocin	0	FKPAYNPYTEPSMEVFSYHQGLK	1	1	ENSRNOT00000004370
Pre-frontal cortex	Streptozocin	0	ATFYLLIGSANAAKPDLDK	3	2	ENSRNOT00000014668,Q75Q39
Pre-frontal cortex	Streptozocin	0	YGLKPPTL	2	2	ENSRNOT00000014668,Q75Q39
Pre-frontal cortex	Streptozocin	0	FRPDMEEEEAKK	13	2	ENSRNOT00000083850,Q9JHW0
Pre-frontal cortex	Streptozocin	0	ISHSPGSPEDPGMDSIVR	4	1	ENSRNOT00000026564
Pre-frontal cortex	Streptozocin	0	EIIAQINTLK	6	3	ENSRNOT00000024330,Q62784,Q62784-2
Pre-frontal cortex	Streptozocin	0	FPTTDGNHLR	1	3	ENSRNOT00000024330,Q62784,Q62784-2
Pre-frontal cortex	Streptozocin	0	YVATLGVEVHPLVFHTNR	29	1	ENSRNOT00000001247
Pre-frontal cortex	Streptozocin	0	FDSPESHVGVAWR	17	3	ENSRNOT00000042432,P32232-2,P32232-3
Pre-frontal cortex	Streptozocin	0	NDLAAVDVR	12	2	ENSRNOT00000024712,P13383
Pre-frontal cortex	Streptozocin	0	GIAYIEFK	4	2	ENSRNOT00000024712,P13383
Pre-frontal cortex	Streptozocin	0	ELNDFISYLQR	8	2	ENSRNOT00000020478,P11598
Pre-frontal cortex	Streptozocin	0	EYDDNGEGITIFRPLHLANK	25	2	ENSRNOT00000020478,P11598
Pre-frontal cortex	Streptozocin	0	VSDTGSAGLM[15.9949]LVEFFAPWCGHCK	1	2	ENSRNOT00000020478,P11598
Pre-frontal cortex	Streptozocin	0	VAGHPDVVINNAAGNFISPSER	7	2	ENSRNOT00000011330,Q64591
Pre-frontal cortex	Streptozocin	0	GIVEQEIQEMVSQR	7	2	ENSRNOT00000058166,P51111
Pre-frontal cortex	Streptozocin	0	MVADECLNK	2	2	ENSRNOT00000058166,P51111
Pre-frontal cortex	Streptozocin	0	VVAAVSHELITSTTR	3	2	ENSRNOT00000058166,P51111
Pre-frontal cortex	Streptozocin	0	HQIEEEFDRR	5	2	ENSRNOT00000058166,P51111
Pre-frontal cortex	Streptozocin	0	DEDHIALIIELLGK	1	2	ENSRNOT00000092641,ENSRNOT00000076429
Pre-frontal cortex	Streptozocin	0	GDYEMEIASLR	8	1	ENSRNOT00000060309
Pre-frontal cortex	Streptozocin	0	KEKQAK	1	1	ENSRNOT00000060309
Pre-frontal cortex	Streptozocin	0	SPVASIVYDLNPNFK	15	3	ENSRNOT00000081014,ENSRNOT00000059162,ENSRNOT00000024264
Pre-frontal cortex	Streptozocin	0	EGIDPAPYYWYTDQR	5	3	ENSRNOT00000081014,ENSRNOT00000059162,ENSRNOT00000024264
Pre-frontal cortex	Streptozocin	0	ELDLPEELVSR	10	2	ENSRNOT00000076292,Q4V7C6
Pre-frontal cortex	Streptozocin	0	ALNQDQVIAVHIDNGFMR	10	2	ENSRNOT00000076292,Q4V7C6
Pre-frontal cortex	Streptozocin	0	ISQMPVILTPLHFDR	13	2	ENSRNOT00000076292,Q4V7C6
Pre-frontal cortex	Streptozocin	0	ISQMPVILTPLHFDRDPLQK	2	2	ENSRNOT00000076292,Q4V7C6
Pre-frontal cortex	Streptozocin	0	IEQLQNHENEDIYK	21	2	ENSRNOT00000014384,ENSRNOT00000056615
Pre-frontal cortex	Streptozocin	0	MHDSHLSSEEPK	19	2	P31596,P31596-2
Pre-frontal cortex	Streptozocin	0	SADCSVEEEPWKR	26	3	ENSRNOT00000007604,P31596,P31596-2
Pre-frontal cortex	Streptozocin	0	CLEDNLGIDK	13	3	ENSRNOT00000007604,P31596,P31596-2
Pre-frontal cortex	Streptozocin	0	NSVVIDECK	10	3	ENSRNOT00000007604,P31596,P31596-2
Pre-frontal cortex	Streptozocin	0	M[15.9949]HEDIEMTK	1	3	ENSRNOT00000007604,P31596,P31596-2
Pre-frontal cortex	Streptozocin	0	HWTGADCGTHFPHNDDAK	3	2	ENSRNOT00000073501,ENSRNOT00000068410
Pre-frontal cortex	Streptozocin	0	AGSISTLDSLDFAR	10	1	ENSRNOT00000020892
Pre-frontal cortex	Streptozocin	0	DQYLLTALELHTELLESGR	11	1	ENSRNOT00000020892
Pre-frontal cortex	Streptozocin	0	YFSNPGNFER	2	1	ENSRNOT00000020892
Pre-frontal cortex	Streptozocin	0	FRDEFVIPH	1	1	ENSRNOT00000020892
Pre-frontal cortex	Streptozocin	0	IRPESSILFLCDMQEK	12	1	ENSRNOT00000071971
Pre-frontal cortex	Streptozocin	0	PAMEPGNGSLDLGGDAAGR	11	2	ENSRNOT00000044477,ENSRNOT00000078061
Pre-frontal cortex	Streptozocin	0	ANFETDEVELSYAK	15	2	ENSRNOT00000044477,ENSRNOT00000078061
Pre-frontal cortex	Streptozocin	0	AVVVCPK	1	2	ENSRNOT00000044477,ENSRNOT00000078061
Pre-frontal cortex	Streptozocin	0	VLGNLQLNLLSK	3	1	O54922
Pre-frontal cortex	Streptozocin	0	HIEQQIQTYQR	1	1	O54922
Pre-frontal cortex	Streptozocin	0	AGNEYLIFQK	11	1	ENSRNOT00000067660
Pre-frontal cortex	Streptozocin	0	TPHLILSSSSQR	1	1	ENSRNOT00000020411
Pre-frontal cortex	Streptozocin	0	NIVEEIEDLVAR	16	1	ENSRNOT00000068135
Pre-frontal cortex	Streptozocin	0	YIANTVELR	3	2	ENSRNOT00000068135,ENSRNOT00000091273
Pre-frontal cortex	Streptozocin	0	ADLQGSASPSK	2	3	ENSRNOT00000027632,O88588,O88588-2
Pre-frontal cortex	Streptozocin	0	GDGADPEGEGVTLQR	6	1	ENSRNOT00000025784
Pre-frontal cortex	Streptozocin	0	AVAAPATTAAEEER	13	1	ENSRNOT00000025784
Pre-frontal cortex	Streptozocin	0	GAALDVHESEPFSFSQGPLK	28	3	ENSRNOT00000057929,ENSRNOT00000065393,Q9Z2F5
Pre-frontal cortex	Streptozocin	0	DHLTAATHWASMDPAVVHPELNGAAYSR	10	3	ENSRNOT00000057929,ENSRNOT00000065393,Q9Z2F5
Pre-frontal cortex	Streptozocin	0	LGILGLGR	11	4	ENSRNOT00000056173,ENSRNOT00000057929,ENSRNOT00000065393,Q9Z2F5
Pre-frontal cortex	Streptozocin	0	EAFQEALAAAGDK	15	1	P11232
Pre-frontal cortex	Streptozocin	0	PTFQFYK	11	4	ENSRNOT00000065073,ENSRNOT00000032330,Q5XHX6-2,P11232
Pre-frontal cortex	Streptozocin	0	MPTFQFYK	3	1	P11232
Pre-frontal cortex	Streptozocin	0	FHSLCDK	1	1	P11232
Pre-frontal cortex	Streptozocin	0	GHVSFKPSLDQQR	11	2	ENSRNOT00000041216,Q63416
Pre-frontal cortex	Streptozocin	0	LEELHVIDVK	2	2	ENSRNOT00000028188,Q9ESW0
Pre-frontal cortex	Streptozocin	0	DVLLPWYNAYR	5	2	ENSRNOT00000086344,ENSRNOT00000093637
Pre-frontal cortex	Streptozocin	0	FGWDCHGLPVEYEIDK	15	2	ENSRNOT00000086344,ENSRNOT00000093637
Pre-frontal cortex	Streptozocin	0	TEISFRPNDPK	16	2	ENSRNOT00000076578,P07340
Pre-frontal cortex	Streptozocin	0	YMQFDDDEK	5	1	ENSRNOT00000021310
Pre-frontal cortex	Streptozocin	0	FILIQNR	12	1	ENSRNOT00000021310
Pre-frontal cortex	Streptozocin	0	VGLDATNCLR	4	1	ENSRNOT00000005855
Pre-frontal cortex	Streptozocin	0	IDMESLLMCTVDDLK	18	1	ENSRNOT00000027665
Pre-frontal cortex	Streptozocin	0	IVESPEFSKDEDYLGK	2	1	ENSRNOT00000027665
Pre-frontal cortex	Streptozocin	0	SLGSLILFDILSNQK	15	1	ENSRNOT00000027665
Pre-frontal cortex	Streptozocin	0	DIQQWEYVPLGPFLGK	5	2	ENSRNOT00000068167,P25093
Pre-frontal cortex	Streptozocin	0	IGVAIGDQILDLSVIK	16	2	ENSRNOT00000068167,P25093
Pre-frontal cortex	Streptozocin	0	AQEHIFGMVLMNDWSAR	5	2	ENSRNOT00000068167,P25093
Pre-frontal cortex	Streptozocin	0	SEQDQAENEGEDSAVLMER	6	1	ENSRNOT00000025782
Pre-frontal cortex	Streptozocin	0	MIINEELMASLDQPTQTVVMHR	10	1	ENSRNOT00000025782
Pre-frontal cortex	Streptozocin	0	LGQGLLLR	1	1	ENSRNOT00000025782
Pre-frontal cortex	Streptozocin	0	EEGLNAFYK	10	3	ENSRNOT00000080824,ENSRNOT00000011494,P16036
Pre-frontal cortex	Streptozocin	0	GSTASQVLQR	10	3	ENSRNOT00000080824,ENSRNOT00000011494,P16036
Pre-frontal cortex	Streptozocin	0	AEQGTVLIGSER	2	2	ENSRNOT00000022836,Q8VHU4
Pre-frontal cortex	Streptozocin	0	INLNLIHDHNPK	6	2	ENSRNOT00000022836,Q8VHU4
Pre-frontal cortex	Streptozocin	0	VDIIETSVKPSILEAQK	3	2	ENSRNOT00000022836,Q8VHU4
Pre-frontal cortex	Streptozocin	0	VPAANILSQESK	8	1	P12007
Pre-frontal cortex	Streptozocin	0	DMPGFSTSK	6	1	P12007
Pre-frontal cortex	Streptozocin	0	AQQNPTLLAELR	10	3	ENSRNOT00000045224,ENSRNOT00000060810,ENSRNOT00000077830
Pre-frontal cortex	Streptozocin	0	KTMAEKR	1	2	ENSRNOT00000060810,ENSRNOT00000077830
Pre-frontal cortex	Streptozocin	0	IAEGAQQGDPLSR	3	1	ENSRNOT00000042875
Pre-frontal cortex	Streptozocin	0	ILAAALTECHR	8	2	ENSRNOT00000052098,ENSRNOT00000090208
Pre-frontal cortex	Streptozocin	0	VSVEDLK	1	1	ENSRNOT00000001924
Pre-frontal cortex	Streptozocin	0	GVYAVGDVCGK	8	3	ENSRNOT00000090036,ENSRNOT00000020252,P70619
Pre-frontal cortex	Streptozocin	0	CVMKMVCANKEEK	1	3	ENSRNOT00000090036,ENSRNOT00000020252,P70619
Pre-frontal cortex	Streptozocin	0	LGPAVLMQAYR	1	1	P21913
Pre-frontal cortex	Streptozocin	0	SILSSLSGEELQTTR	5	1	ENSRNOT00000058619
Pre-frontal cortex	Streptozocin	0	DCAVLSAILDLIK	13	1	ENSRNOT00000019824
Pre-frontal cortex	Streptozocin	0	QLLDQVEQIQK	2	2	ENSRNOT00000006802,ENSRNOT00000078572
Pre-frontal cortex	Streptozocin	0	QEVINELFVTEASHLR	1	3	ENSRNOT00000020717,ENSRNOT00000091336,Q9ES67
Pre-frontal cortex	Streptozocin	0	EQFEFALTAVAEEVNAILK	13	1	ENSRNOT00000006942
Pre-frontal cortex	Streptozocin	0	IENVSYQDR	2	1	ENSRNOT00000073039
Pre-frontal cortex	Streptozocin	0	NSGMVPSLEPFSEFHLTVLAYNSK	2	1	ENSRNOT00000073039
Pre-frontal cortex	Streptozocin	0	NLPSLGDNEMLIGK	8	2	ENSRNOT00000036717,ENSRNOT00000085452
Pre-frontal cortex	Streptozocin	0	ENEGTYYGPDGR	2	3	ENSRNOT00000082627,ENSRNOT00000016083,P13635
Pre-frontal cortex	Streptozocin	0	EMGPTYADPVCLSK	4	3	ENSRNOT00000082627,ENSRNOT00000016083,P13635
Pre-frontal cortex	Streptozocin	0	DLYSGLIGPLIVCR	1	3	ENSRNOT00000082627,ENSRNOT00000016083,P13635
Pre-frontal cortex	Streptozocin	0	AGLQAFFQVR	1	3	ENSRNOT00000082627,ENSRNOT00000016083,P13635
Pre-frontal cortex	Streptozocin	0	YLDFIFAVK	5	1	ENSRNOT00000000177
Pre-frontal cortex	Streptozocin	0	TPEEESIDWTK	3	1	ENSRNOT00000021638
Pre-frontal cortex	Streptozocin	0	DYDVSFGDGVLTIK	3	2	ENSRNOT00000071614,D3ZYW7
Pre-frontal cortex	Streptozocin	0	LDLSSLAYSGK	2	3	ENSRNOT00000071614,ENSRNOT00000020412,D3ZYW7
Pre-frontal cortex	Streptozocin	0	VITFIDLAGHEK	9	1	ENSRNOT00000049247
Pre-frontal cortex	Streptozocin	0	QELEAEYLAIFK	7	2	ENSRNOT00000036745,ENSRNOT00000007300
Pre-frontal cortex	Streptozocin	0	EYILYSDSMK	1	2	ENSRNOT00000059419,ENSRNOT00000087254
Pre-frontal cortex	Streptozocin	0	TIAACNLPIVQGPCR	1	1	ENSRNOT00000009248
Pre-frontal cortex	Streptozocin	0	LEALEQALCK	1	2	ENSRNOT00000081637,ENSRNOT00000090638
Pre-frontal cortex	Streptozocin	0	YDLMNDMMSLGIHR	7	1	Q4G064
Pre-frontal cortex	Streptozocin	0	LGDIDAATEQK	2	1	ENSRNOT00000015643
Pre-frontal cortex	Streptozocin	0	VIDTTTLPVYPK	1	1	ENSRNOT00000015643
Pre-frontal cortex	Streptozocin	0	SPVISRPKSTPSSQPSANGVQTEGLDYDR	1	1	ENSRNOT00000039974
Pre-frontal cortex	Streptozocin	0	GAQVEEIWSLEPENFEK	1	2	ENSRNOT00000077153,ENSRNOT00000004881
Pre-frontal cortex	Streptozocin	0	EEDAFHFVSYVPVNGR	1	2	ENSRNOT00000077153,ENSRNOT00000004881
Pre-frontal cortex	Streptozocin	0	FNLMAIVSDR	7	2	ENSRNOT00000077153,ENSRNOT00000004881
Pre-frontal cortex	Streptozocin	0	AIVQDQGCLPGLILFMDHPNPSVVHSALLALR	19	1	ENSRNOT00000018548
Pre-frontal cortex	Streptozocin	0	VGEIVVFR	1	2	ENSRNOT00000015218,P42667
Pre-frontal cortex	Streptozocin	0	GLWWLVPR	15	1	ENSRNOT00000030656
Pre-frontal cortex	Streptozocin	0	DLKPENLLYATPFEDSK	2	2	ENSRNOT00000090795,O70150-2
Pre-frontal cortex	Streptozocin	0	EHCIVNYQVK	1	1	ENSRNOT00000015448
Pre-frontal cortex	Streptozocin	0	LLIGADGHNSGVR	2	1	Q68FU7
Pre-frontal cortex	Streptozocin	0	LLQADTSVR	2	2	ENSRNOT00000066678,ENSRNOT00000084388
Pre-frontal cortex	Streptozocin	0	SCLMSVEPAISTK	1	2	ENSRNOT00000024694,Q9QXJ0
Pre-frontal cortex	Streptozocin	0	AIMEMPSFYSPTLPR	1	2	ENSRNOT00000028181,P55266
Pre-frontal cortex	Streptozocin	0	TVLGIGPGPVELIDEVTGHLK	6	1	ENSRNOT00000005661
Pre-frontal cortex	Streptozocin	0	QVCEAAPDNAVQLLGELMNQSHR	1	2	ENSRNOT00000083356,Q5XIG6
Pre-frontal cortex	Streptozocin	0	MFPALGFGAK	8	2	ENSRNOT00000000629,ENSRNOT00000039857
Pre-frontal cortex	Streptozocin	0	AFIGIGFGDR	4	2	ENSRNOT00000011394,Q6P756-2
Pre-frontal cortex	Streptozocin	0	SISTSLPVLDLIDAIAPNAVRPEMIK	7	1	ENSRNOT00000013209
Pre-frontal cortex	Streptozocin	0	GNSMEEILEGLK	1	1	P09006
Pre-frontal cortex	Streptozocin	0	FGDLSSASAIMGNPQVK	14	1	P11517
Pre-frontal cortex	Streptozocin	0	ATVSGLWGK	12	1	P11517
Pre-frontal cortex	Streptozocin	0	LLGNM[15.9949]IVIVLGH	11	4	ENSRNOT00000090422,ENSRNOT00000087661,P11517,P02091
Pre-frontal cortex	Streptozocin	0	AFNDGLK	5	3	ENSRNOT00000090422,P11517,P02091
Pre-frontal cortex	Streptozocin	0	QGYQCQVCTCVVHK	3	2	ENSRNOT00000006729,P09216
Pre-frontal cortex	Streptozocin	0	IWMVDSK	10	2	ENSRNOT00000023329,ENSRNOT00000087067
Pre-frontal cortex	Streptozocin	0	ANANAFR	2	2	ENSRNOT00000023329,ENSRNOT00000087067
Pre-frontal cortex	Streptozocin	0	IIHGQDFDQR	3	1	Q6Q7Y5
Pre-frontal cortex	Streptozocin	0	DAGPLLISLK	13	1	ENSRNOT00000026496
Pre-frontal cortex	Streptozocin	0	PVHAVFVSEGK	26	1	ENSRNOT00000026496
Pre-frontal cortex	Streptozocin	0	LDRLEETVQAK	23	1	ENSRNOT00000026496
Pre-frontal cortex	Streptozocin	0	ICEASGGGAFLVLPLGK	9	1	ENSRNOT00000026496
Pre-frontal cortex	Streptozocin	0	EACEAVGATLETLHFGK	1	2	ENSRNOT00000051496,ENSRNOT00000067070
Pre-frontal cortex	Streptozocin	0	TSHIDELYESAK	24	4	ENSRNOT00000078073,ENSRNOT00000090026,P13264,P13264-2
Pre-frontal cortex	Streptozocin	0	GGTPPQQQQQQQQPGASPPAAPGPK	43	2	ENSRNOT00000078073,ENSRNOT00000090026
Pre-frontal cortex	Streptozocin	0	SMVDELFAEIVR	12	1	ENSRNOT00000003414
Pre-frontal cortex	Streptozocin	0	FESAFLSHVVSQHQSLLGN	20	2	ENSRNOT00000022892,P15999
Pre-frontal cortex	Streptozocin	0	SWMEDNAFR	1	1	ENSRNOT00000047387
Pre-frontal cortex	Streptozocin	0	NLPLPPPPPPR	42	2	ENSRNOT00000025980,ENSRNOT00000025916
Pre-frontal cortex	Streptozocin	0	DYDDMSPR	4	2	ENSRNOT00000025980,ENSRNOT00000025916
Pre-frontal cortex	Streptozocin	0	VVECIK	1	2	ENSRNOT00000025980,ENSRNOT00000025916
Pre-frontal cortex	Streptozocin	0	SKHLIHSK	2	2	ENSRNOT00000066120,ENSRNOT00000092887
Pre-frontal cortex	Streptozocin	0	TIISYIDEQFER	11	1	ENSRNOT00000024261
Pre-frontal cortex	Streptozocin	0	ELGSSVALYSR	9	1	Q5XHZ0
Pre-frontal cortex	Streptozocin	0	IVQVVTAEAVAVLK	50	6	ENSRNOT00000043627,ENSRNOT00000092445,P15146,P15146-2,P15146-3,P15146-4
Pre-frontal cortex	Streptozocin	0	LGRPDGVPMPDK	26	2	ENSRNOT00000085653,ENSRNOT00000077604
Pre-frontal cortex	Streptozocin	0	TGQATVASGIPAGWMGLDCGTESSK	53	2	ENSRNOT00000085653,ENSRNOT00000077604
Pre-frontal cortex	Streptozocin	0	YPIEHGIITNWDDM[15.9949]EK	34	5	ENSRNOT00000083468,P68136,P62738,P63269,P68035
Pre-frontal cortex	Streptozocin	0	ITALAPSTM[15.9949]K	1	8	ENSRNOT00000083468,ENSRNOT00000080216,P60711,P68136,P62738,P63269,P68035,P63259
Pre-frontal cortex	Streptozocin	0	FPSIVGRPR	3	8	ENSRNOT00000083468,ENSRNOT00000080216,P60711,P68136,P62738,P63269,P68035,P63259
Pre-frontal cortex	Streptozocin	0	QASPSIVIALAGNK	15	1	ENSRNOT00000061878
Pre-frontal cortex	Streptozocin	0	AVDFQEAQSYADDNSLLFMETSAK	12	1	M0RC99
Pre-frontal cortex	Streptozocin	0	SVSELPIVHR	26	1	P20760
Pre-frontal cortex	Streptozocin	0	NYNDELQFLDK	14	1	ENSRNOT00000006570
Pre-frontal cortex	Streptozocin	0	NVTDVVNTCHDAGISK	31	1	ENSRNOT00000006570
Pre-frontal cortex	Streptozocin	0	NVDIWSVGCIMGEMVR	3	4	ENSRNOT00000092542,ENSRNOT00000092719,ENSRNOT00000092395,P49187-2
Pre-frontal cortex	Streptozocin	0	ISVDDALQHPY	2	4	ENSRNOT00000092542,ENSRNOT00000092719,ENSRNOT00000092395,P49187-2
Pre-frontal cortex	Streptozocin	0	LGATIDVEHSHVR	3	2	Q63487-2,Q63486
Pre-frontal cortex	Streptozocin	0	GGGVGADPAEALRPACPPDYTLALR	3	2	Q62888,Q62888-2
Pre-frontal cortex	Streptozocin	0	ASYAAGPASNYADPYR	1	1	ENSRNOT00000044871
Pre-frontal cortex	Streptozocin	0	NSYGAPAEDIK	2	1	ENSRNOT00000044871
Pre-frontal cortex	Streptozocin	0	ILEMGITGPEGHALSRPEELEAEAVFR	34	1	ENSRNOT00000065334
Pre-frontal cortex	Streptozocin	0	SDSQLYEAFTFLK	1	1	ENSRNOT00000065334
Pre-frontal cortex	Streptozocin	0	TPVVIDYTPYLK	6	2	ENSRNOT00000028487,ENSRNOT00000089616
Pre-frontal cortex	Streptozocin	0	GYLEELVR	9	2	ENSRNOT00000028487,ENSRNOT00000089616
Pre-frontal cortex	Streptozocin	0	VTTFFSGK	3	4	ENSRNOT00000013900,ENSRNOT00000082267,ENSRNOT00000055038,Q62848-2
Pre-frontal cortex	Streptozocin	0	LAWVSHDSTVSVADASK	30	1	Q99PD4
Pre-frontal cortex	Streptozocin	0	EHNGHITGIDWAPK	13	1	Q99PD4
Pre-frontal cortex	Streptozocin	0	LSAETWDLLR	3	3	ENSRNOT00000084567,ENSRNOT00000067840,Q9R080-4
Pre-frontal cortex	Streptozocin	0	SLENVLEINK	9	2	ENSRNOT00000089108,ENSRNOT00000068493
Pre-frontal cortex	Streptozocin	0	GNSGLGFSIAGGTDNPHIGDDPSIFITK	12	2	ENSRNOT00000089108,ENSRNOT00000068493
Pre-frontal cortex	Streptozocin	0	NEVVVELR	3	1	ENSRNOT00000014384
Pre-frontal cortex	Streptozocin	0	GQPLLLFR	13	1	ENSRNOT00000056173
Pre-frontal cortex	Streptozocin	0	EELIAELQDCEGLIVR	1	1	ENSRNOT00000056173
Pre-frontal cortex	Streptozocin	0	QLVEQVEQIQK	4	1	ENSRNOT00000036140
Pre-frontal cortex	Streptozocin	0	SSPAYCTSSSDITEPEQK	3	8	ENSRNOT00000092424,ENSRNOT00000000572,ENSRNOT00000040859,Q9QUH6,Q9QUH6-2,Q9QUH6-3,Q9QUH6-4,Q9QUH6-5
Pre-frontal cortex	Streptozocin	0	IEDLGAAMEEALILDNK	25	4	ENSRNOT00000091697,ENSRNOT00000079640,ENSRNOT00000079108,P16086
Pre-frontal cortex	Streptozocin	0	QQEGIANITALK	5	4	ENSRNOT00000091697,ENSRNOT00000079640,ENSRNOT00000079108,P16086
Pre-frontal cortex	Streptozocin	0	LDENSAFLQFNWK	20	4	ENSRNOT00000091697,ENSRNOT00000079640,ENSRNOT00000079108,P16086
Pre-frontal cortex	Streptozocin	0	QQNFNTGIK	3	4	ENSRNOT00000091697,ENSRNOT00000079640,ENSRNOT00000079108,P16086
Pre-frontal cortex	Streptozocin	0	DLASVNNLLK	12	4	ENSRNOT00000091697,ENSRNOT00000079640,ENSRNOT00000079108,P16086
Pre-frontal cortex	Streptozocin	0	M[15.9949]QHNLEQQIQAR	7	4	ENSRNOT00000091697,ENSRNOT00000079640,ENSRNOT00000079108,P16086
Pre-frontal cortex	Streptozocin	0	QSQVTEEEAATAQK	11	3	ENSRNOT00000026482,Q5QD51-2,Q5QD51-3
Pre-frontal cortex	Streptozocin	0	LYFDALECLPEDK	6	1	ENSRNOT00000031115
Pre-frontal cortex	Streptozocin	0	ACFTSLMNTLMTSLPSLVQQQGR	17	1	ENSRNOT00000016230
Pre-frontal cortex	Streptozocin	0	VVVLMGSTSDLGHCEK	2	1	ENSRNOT00000063942
Pre-frontal cortex	Streptozocin	0	ETCPSCPACVDAK	12	2	ENSRNOT00000021223,ENSRNOT00000090519
Pre-frontal cortex	Streptozocin	0	IEHLISSR	1	2	ENSRNOT00000021223,ENSRNOT00000090519
Pre-frontal cortex	Streptozocin	0	GAIVPAQEVPPPTVPMDYSWAR	18	5	ENSRNOT00000077579,ENSRNOT00000023447,ENSRNOT00000043172,P16638,P16638-2
Pre-frontal cortex	Streptozocin	0	DGVYILDLAAK	9	5	ENSRNOT00000077579,ENSRNOT00000023447,ENSRNOT00000043172,P16638,P16638-2
Pre-frontal cortex	Streptozocin	0	EILIPVFK	15	5	ENSRNOT00000077579,ENSRNOT00000023447,ENSRNOT00000043172,P16638,P16638-2
Pre-frontal cortex	Streptozocin	0	TVEIVDSVEAYATMLR	5	2	ENSRNOT00000013785,P38652
Pre-frontal cortex	Streptozocin	0	IDAMHGVVGPY	1	2	ENSRNOT00000013785,P38652
Pre-frontal cortex	Streptozocin	0	TVLSALSR	1	2	ENSRNOT00000012114,Q9QZA2
Pre-frontal cortex	Streptozocin	0	VTILNGASQDLIPQLK	18	2	ENSRNOT00000050269,P22734-2
Pre-frontal cortex	Streptozocin	0	AGASISTLAGLSLR	12	2	ENSRNOT00000026394,Q9QUR2-2
Pre-frontal cortex	Streptozocin	0	DAAAEYDELAEPQDFQDDPDIVAFR	2	2	ENSRNOT00000026394,Q9QUR2-2
Pre-frontal cortex	Streptozocin	0	QVPPDLFQPYIEEICQNLR	26	2	ENSRNOT00000025847,P26817
Pre-frontal cortex	Streptozocin	0	IDVVVNNAGILR	7	2	ENSRNOT00000089750,ENSRNOT00000021646
Pre-frontal cortex	Streptozocin	0	IGSTTNPFLDIPHDPNAAVYK	19	4	ENSRNOT00000068629,ENSRNOT00000041994,ENSRNOT00000068177,ENSRNOT00000067886
Pre-frontal cortex	Streptozocin	0	CTVDVPEDLR	2	1	Q5XI81
Pre-frontal cortex	Streptozocin	0	YGIVDYMVEQSGPPSK	3	2	ENSRNOT00000008728,P38659
Pre-frontal cortex	Streptozocin	0	PSLVTSFIR	11	4	ENSRNOT00000076367,ENSRNOT00000016851,ENSRNOT00000077011,Q9Z339
Pre-frontal cortex	Streptozocin	0	VPSLVTSFIR	19	4	ENSRNOT00000076367,ENSRNOT00000016851,ENSRNOT00000077011,Q9Z339
Pre-frontal cortex	Streptozocin	0	VYFIYEGYQGMVDGGSNIVEAK	21	2	ENSRNOT00000023252,P47860
Pre-frontal cortex	Streptozocin	0	LGITNLCVIGGDGSLTGANLFR	43	2	ENSRNOT00000023252,P47860
Pre-frontal cortex	Streptozocin	0	VTILGH	1	2	ENSRNOT00000023252,P47860
Pre-frontal cortex	Streptozocin	0	LKPDEGGEVPVLNVSYKPQK	3	1	ENSRNOT00000024753
Pre-frontal cortex	Streptozocin	0	PGFSIADK	2	2	ENSRNOT00000090019,P62914
Pre-frontal cortex	Streptozocin	0	EILTLLQGVHQGTGFQDIPK	13	1	ENSRNOT00000068524
Pre-frontal cortex	Streptozocin	0	ILTLLQGVHQGTGFQDIPK	7	1	ENSRNOT00000068524
Pre-frontal cortex	Streptozocin	0	HLSLPAGQVVPK	2	1	ENSRNOT00000037660
Pre-frontal cortex	Streptozocin	0	APQETYADIGGLDNQIQEIK	35	1	ENSRNOT00000005329
Pre-frontal cortex	Streptozocin	0	IFQIHTSR	2	1	ENSRNOT00000005329
Pre-frontal cortex	Streptozocin	0	YEPPVPTR	1	1	ENSRNOT00000005329
Pre-frontal cortex	Streptozocin	0	EWCFKPCEIR	23	2	ENSRNOT00000024775,Q9WTT6
Pre-frontal cortex	Streptozocin	0	YLSEEELNVFSER	2	2	ENSRNOT00000024775,Q9WTT6
Pre-frontal cortex	Streptozocin	0	LYLGDDR	1	2	ENSRNOT00000024775,Q9WTT6
Pre-frontal cortex	Streptozocin	0	NINADEAAAMGAVYQAAALSK	23	2	ENSRNOT00000044613,Q63617
Pre-frontal cortex	Streptozocin	0	LPATEKPVLLSK	18	2	ENSRNOT00000044613,Q63617
Pre-frontal cortex	Streptozocin	0	SLAEDFAEQPIK	3	2	ENSRNOT00000044613,Q63617
Pre-frontal cortex	Streptozocin	0	TLGGLEMELR	2	2	ENSRNOT00000044613,Q63617
Pre-frontal cortex	Streptozocin	0	GHVFEESQVAGTPMFVVK	26	1	ENSRNOT00000047450
Pre-frontal cortex	Streptozocin	0	VFSGVVSTGLK	6	1	ENSRNOT00000047450
Pre-frontal cortex	Streptozocin	0	ARPFPDGLAEDIDKGEVSAR	28	1	ENSRNOT00000047450
Pre-frontal cortex	Streptozocin	0	STLTDSLVCK	13	1	ENSRNOT00000047450
Pre-frontal cortex	Streptozocin	0	IVGLVGVDQFLVK	12	1	ENSRNOT00000047450
Pre-frontal cortex	Streptozocin	0	IMIDPVLGTVGFGSGLHGWAFTLK	22	1	ENSRNOT00000047450
Pre-frontal cortex	Streptozocin	0	SDPVVSYR	12	1	ENSRNOT00000047450
Pre-frontal cortex	Streptozocin	0	YVEPIEDVPCGN	13	1	ENSRNOT00000047450
Pre-frontal cortex	Streptozocin	0	ARPFPDGLAEDIDK	4	1	ENSRNOT00000047450
Pre-frontal cortex	Streptozocin	0	GALCEENMR	4	1	ENSRNOT00000047450
Pre-frontal cortex	Streptozocin	0	GYGAGVITVFK	11	1	ENSRNOT00000014586
Pre-frontal cortex	Streptozocin	0	SLAMEMVLTGDR	7	1	P14604
Pre-frontal cortex	Streptozocin	0	DIIALNPLYR	7	1	Q924S5
Pre-frontal cortex	Streptozocin	0	YLDWLTSIPWGR	2	1	Q924S5
Pre-frontal cortex	Streptozocin	0	CIVLIDSTPYR	1	2	ENSRNOT00000081747,ENSRNOT00000009490
Pre-frontal cortex	Streptozocin	0	AINLLFDIAR	7	1	ENSRNOT00000035002
Pre-frontal cortex	Streptozocin	0	AAAQELWELAAQK	14	2	ENSRNOT00000015843,P46844
Pre-frontal cortex	Streptozocin	0	TLVEDLFADK	4	2	ENSRNOT00000043895,F1LNJ2
Pre-frontal cortex	Streptozocin	0	FMSDAYMGCDQEYK	1	2	ENSRNOT00000043895,F1LNJ2
Pre-frontal cortex	Streptozocin	0	IDAFWLQR	1	2	ENSRNOT00000043895,F1LNJ2
Pre-frontal cortex	Streptozocin	0	AQPSVSLGAAYR	1	2	ENSRNOT00000071020,ENSRNOT00000072373
Pre-frontal cortex	Streptozocin	0	FFEHFIEGGR	27	1	ENSRNOT00000028752
Pre-frontal cortex	Streptozocin	0	EHPGAPPQPPAPPQPGLAPPSR	3	3	ENSRNOT00000034389,Q63560,Q63560-2
Pre-frontal cortex	Streptozocin	0	ATGPAPGPSGDR	4	3	ENSRNOT00000034389,Q63560,Q63560-2
Pre-frontal cortex	Streptozocin	0	HEGLDAIENAVENLDATSDK	19	3	ENSRNOT00000008976,ENSRNOT00000085967,ENSRNOT00000086928
Pre-frontal cortex	Streptozocin	0	GLEHPLFPKDIFHDLIACVTM[15.9949]DNLQER	1	3	ENSRNOT00000008976,ENSRNOT00000085967,ENSRNOT00000086928
Pre-frontal cortex	Streptozocin	0	TYAHYFDLTIINNEIDETIR	21	4	ENSRNOT00000091382,ENSRNOT00000082316,ENSRNOT00000084218,Q62915
Pre-frontal cortex	Streptozocin	0	QWSHISESAK	1	3	ENSRNOT00000091382,ENSRNOT00000084218,Q62915
Pre-frontal cortex	Streptozocin	0	MLFYSFFK	9	2	ENSRNOT00000081527,ENSRNOT00000081265
Pre-frontal cortex	Streptozocin	0	MVGGIAQIIAAQEEMLR	14	1	ENSRNOT00000022400
Pre-frontal cortex	Streptozocin	0	EAAFHPEVAPDVR	2	1	ENSRNOT00000022400
Pre-frontal cortex	Streptozocin	0	WPYAGTAEAVK	17	1	P56571
Pre-frontal cortex	Streptozocin	0	ELHDMFM[15.9949]DMAMLVESQGEMIDR	4	1	ENSRNOT00000049601
Pre-frontal cortex	Streptozocin	0	GQNDLMGTAEDFADQFLR	21	2	ENSRNOT00000078429,ENSRNOT00000071754
Pre-frontal cortex	Streptozocin	0	NSNLYMVMEYVPGGEMFSHLR	13	5	ENSRNOT00000041717,ENSRNOT00000068739,ENSRNOT00000089740,P27791,P27791-2
Pre-frontal cortex	Streptozocin	0	DQEAHGPGPVCC	10	1	ENSRNOT00000001347
Pre-frontal cortex	Streptozocin	0	FNPVLYPK	8	1	ENSRNOT00000092203
Pre-frontal cortex	Streptozocin	0	AQSPCFGDDDPAKK	12	1	ENSRNOT00000013088
Pre-frontal cortex	Streptozocin	0	AFFPACYGGDGR	19	1	ENSRNOT00000020720
Pre-frontal cortex	Streptozocin	0	LILEYVK	13	1	ENSRNOT00000001820
Pre-frontal cortex	Streptozocin	0	EAYALCHCLPVLSTDK	8	1	ENSRNOT00000001820
Pre-frontal cortex	Streptozocin	0	IAILHENFTTVKPEDAYEDFIVKPPVR	26	3	ENSRNOT00000034472,ENSRNOT00000076560,ENSRNOT00000075978
Pre-frontal cortex	Streptozocin	0	KRPDEVPDAGPMK	17	2	ENSRNOT00000012091,P97546-3
Pre-frontal cortex	Streptozocin	0	SVGYPHPEWMWR	14	3	ENSRNOT00000012091,P97546-1,P97546-3
Pre-frontal cortex	Streptozocin	0	TLLSDLVAQCVAK	1	1	ENSRNOT00000043345
Pre-frontal cortex	Streptozocin	0	EMGIVPSWGGASR	1	1	ENSRNOT00000015440
Pre-frontal cortex	Streptozocin	0	LMTEESVIR	2	1	ENSRNOT00000015440
Pre-frontal cortex	Streptozocin	0	DMGEDLECLCQIMR	9	2	ENSRNOT00000014788,ENSRNOT00000064535
Pre-frontal cortex	Streptozocin	0	ITGELEYATK	5	1	ENSRNOT00000014458
Pre-frontal cortex	Streptozocin	0	IEDLSQQAQLAAAEK	14	2	ENSRNOT00000075681,ENSRNOT00000085092
Pre-frontal cortex	Streptozocin	0	KVHVIFNYK	25	1	ENSRNOT00000004091
Pre-frontal cortex	Streptozocin	0	DM[15.9949]HGDSEYNIMFGPDICGPGTK	1	1	ENSRNOT00000004091
Pre-frontal cortex	Streptozocin	0	QIDNPDYK	4	1	ENSRNOT00000004091
Pre-frontal cortex	Streptozocin	0	LFPGGLDQK	7	1	ENSRNOT00000004091
Pre-frontal cortex	Streptozocin	0	HASIQMNVAEVDR	1	2	ENSRNOT00000059383,P05765
Pre-frontal cortex	Streptozocin	0	EAGFPPGVVNIITGYGPTAGAAIAQHMDVDK	6	2	ENSRNOT00000015281,Q66HF8
Pre-frontal cortex	Streptozocin	0	SAINEVVTR	7	1	ENSRNOT00000033733
Pre-frontal cortex	Streptozocin	0	VICDGCNGPVVGTR	1	3	O08623,O08623-2,O08623-3
Pre-frontal cortex	Streptozocin	0	DISTLEPLK	6	4	ENSRNOT00000012478,ENSRNOT00000020443,P49911,Q9EST6
Pre-frontal cortex	Streptozocin	0	ISTLEPLK	4	4	ENSRNOT00000012478,ENSRNOT00000020443,P49911,Q9EST6
Pre-frontal cortex	Streptozocin	0	DETLYIFPSDFCR	2	1	ENSRNOT00000003052
Pre-frontal cortex	Streptozocin	0	CNADPGLSALLSDHR	10	1	ENSRNOT00000024710
Pre-frontal cortex	Streptozocin	0	LWWLDLK	11	1	ENSRNOT00000024710
Pre-frontal cortex	Streptozocin	0	EVMSDLEESK	5	2	ENSRNOT00000088657,ENSRNOT00000026051
Pre-frontal cortex	Streptozocin	0	YMALSLQSFCPTTR	1	2	ENSRNOT00000088657,ENSRNOT00000026051
Pre-frontal cortex	Streptozocin	0	TDSDSDLQLYK	1	2	ENSRNOT00000088657,ENSRNOT00000026051
Pre-frontal cortex	Streptozocin	0	AQPSQAADEPAEK	4	1	ENSRNOT00000015946
Pre-frontal cortex	Streptozocin	0	LVSLIGSK	12	1	ENSRNOT00000015946
Pre-frontal cortex	Streptozocin	0	NVSIGIVGK	12	1	ENSRNOT00000015946
Pre-frontal cortex	Streptozocin	0	FVFDRPLPVSR	17	1	ENSRNOT00000015946
Pre-frontal cortex	Streptozocin	0	IMAPGLLHAYPPQVYGYDDLQMLQTR	10	2	ENSRNOT00000024364,ENSRNOT00000089042
Pre-frontal cortex	Streptozocin	0	IDLAVLLGK	12	2	ENSRNOT00000024364,ENSRNOT00000089042
Pre-frontal cortex	Streptozocin	0	QRPQATAEQIR	1	2	ENSRNOT00000024364,ENSRNOT00000089042
Pre-frontal cortex	Streptozocin	0	LTEQLAGPLR	1	1	ENSRNOT00000060695
Pre-frontal cortex	Streptozocin	0	QVYQQCWR	4	1	ENSRNOT00000067085
Pre-frontal cortex	Streptozocin	0	WPEVDDDSIEDLGEVKK	5	1	ENSRNOT00000001467
Pre-frontal cortex	Streptozocin	0	AAQPTDDPLSLLDPLWTLNK	21	2	ENSRNOT00000056145,O88902
Pre-frontal cortex	Streptozocin	0	AALPTPALTPEDK	1	2	ENSRNOT00000056145,O88902
Pre-frontal cortex	Streptozocin	0	MDASLSTLANCEK	8	1	ENSRNOT00000076882
Pre-frontal cortex	Streptozocin	0	DWAEFVK	2	1	ENSRNOT00000076882
Pre-frontal cortex	Streptozocin	0	AQVHEYLGWHADNIR	2	2	ENSRNOT00000079941,P30713
Pre-frontal cortex	Streptozocin	0	STSFQTQLGPSGHDAGR	8	1	ENSRNOT00000004191
Pre-frontal cortex	Streptozocin	0	HADGVFTSDYSR	7	2	ENSRNOT00000092791,ENSRNOT00000025477
Pre-frontal cortex	Streptozocin	0	IMNLTVMLDTALGKPR	14	1	ENSRNOT00000006685
Pre-frontal cortex	Streptozocin	0	IEQAMDLVK	1	6	ENSRNOT00000058206,ENSRNOT00000001360,ENSRNOT00000085118,ENSRNOT00000015119,ENSRNOT00000088139,Q3B8N7
Pre-frontal cortex	Streptozocin	0	LGGPSVSLR	4	2	ENSRNOT00000087005,ENSRNOT00000054944
Pre-frontal cortex	Streptozocin	0	SLNANTDITSLAR	4	2	ENSRNOT00000085135,ENSRNOT00000063810
Pre-frontal cortex	Streptozocin	0	HVLEDVTTFFK	4	1	ENSRNOT00000059516
Pre-frontal cortex	Streptozocin	0	GFAFVYFER	3	1	ENSRNOT00000012325
Pre-frontal cortex	Streptozocin	0	WPTHPLLIQCFADHILK	3	1	ENSRNOT00000024328
Pre-frontal cortex	Streptozocin	0	YYIGFR	1	1	ENSRNOT00000024328
Pre-frontal cortex	Streptozocin	0	EILSPVDIMDR	9	2	ENSRNOT00000011237,P97544
Pre-frontal cortex	Streptozocin	0	EVFGSGTACQVCPVHQILYEGK	1	2	ENSRNOT00000028474,O35854
Pre-frontal cortex	Streptozocin	0	MSSVFEDQNAATHLIR	3	3	ENSRNOT00000090376,ENSRNOT00000090579,O88483
Pre-frontal cortex	Streptozocin	0	MLSLPEELAR	1	3	ENSRNOT00000090376,ENSRNOT00000090579,O88483
Pre-frontal cortex	Streptozocin	0	QLCAEHGISPEGIVEEFATEGTDR	2	2	ENSRNOT00000008576,ENSRNOT00000027370
Pre-frontal cortex	Streptozocin	0	LPSAHTCFNQLDLPAYESFEK	1	1	P51593
Pre-frontal cortex	Streptozocin	0	SILTVPWVELGGECSINCSK	1	2	ENSRNOT00000089441,ENSRNOT00000065280
Pre-frontal cortex	Streptozocin	0	VSQAEEIPDQR	5	2	ENSRNOT00000078020,ENSRNOT00000024163
Pre-frontal cortex	Streptozocin	0	VSAITVVSCLPLYVLK	1	1	ENSRNOT00000041380
Pre-frontal cortex	Streptozocin	0	GSSHQVEYEILFPGCVLR	10	4	ENSRNOT00000087383,ENSRNOT00000006542,Q99MS0,Q9Z1J8
Pre-frontal cortex	Streptozocin	0	DFTATDLTEFAAR	4	2	ENSRNOT00000067018,P13437
Pre-frontal cortex	Streptozocin	0	LQGLVEGVTYPACHGIWSK	4	4	ENSRNOT00000028064,ENSRNOT00000022383,Q62634-2,Q9JI12
Pre-frontal cortex	Streptozocin	0	HYSLDDWK	1	2	ENSRNOT00000023613,Q9Z244
Pre-frontal cortex	Streptozocin	0	LWELTDMSSIFTVPNVR	18	1	ENSRNOT00000009417
Pre-frontal cortex	Streptozocin	0	DNGELLPILK	8	3	ENSRNOT00000022406,ENSRNOT00000083316,Q9JLZ1-2
Pre-frontal cortex	Streptozocin	0	LTDEELQTDLGMK	1	1	ENSRNOT00000013639
Pre-frontal cortex	Streptozocin	0	YLAEVASGEKK	1	2	ENSRNOT00000086769,ENSRNOT00000085735
Pre-frontal cortex	Streptozocin	0	WYPEVR	12	4	ENSRNOT00000087094,ENSRNOT00000092558,ENSRNOT00000073886,Q6RUV5
Pre-frontal cortex	Streptozocin	0	HELQTNCYEVKD	2	1	ENSRNOT00000022273
Pre-frontal cortex	Streptozocin	0	IVSSASTDLQDYTYYFVPAPWLSVK	55	1	ENSRNOT00000020304
Pre-frontal cortex	Streptozocin	0	NPTFMCLALH	8	1	ENSRNOT00000020304
Pre-frontal cortex	Streptozocin	0	LPVTINK	11	1	ENSRNOT00000020304
Pre-frontal cortex	Streptozocin	0	ARPEFM[15.9949]LPVHFYGR	1	1	P09811
Pre-frontal cortex	Streptozocin	0	IVSNASCTTNCLAPLAK	54	3	ENSRNOT00000008002,ENSRNOT00000030148,P04797
Pre-frontal cortex	Streptozocin	0	KVTQSAYAQIVQFGM[15.9949]NEKVGQISFDLPR	1	1	ENSRNOT00000024632
Pre-frontal cortex	Streptozocin	0	NALFCLETAWASISNSQESHVYTK	19	1	ENSRNOT00000009467
Pre-frontal cortex	Streptozocin	0	DAVNEEESVHWQRPK	2	1	ENSRNOT00000009467
Pre-frontal cortex	Streptozocin	0	IHVSLEMSPDFLAVPVGSHEDSHCICGNER	1	1	ENSRNOT00000009467
Pre-frontal cortex	Streptozocin	0	CLQNYIPAHSLTLSCPVCR	4	1	D3ZQG6
Pre-frontal cortex	Streptozocin	0	VLLPLHK	4	3	ENSRNOT00000007595,ENSRNOT00000086143,ENSRNOT00000022862
Pre-frontal cortex	Streptozocin	0	LQDETNLR	9	3	ENSRNOT00000034401,P47819-2,P47819-3
Pre-frontal cortex	Streptozocin	0	GTNESLER	1	5	ENSRNOT00000034401,ENSRNOT00000024430,P31000,P47819-2,P47819-3
Pre-frontal cortex	Streptozocin	0	IHEEEVR	1	3	ENSRNOT00000034401,P47819-2,P47819-3
Pre-frontal cortex	Streptozocin	0	ITQFCHHFLEGK	6	1	ENSRNOT00000054958
Pre-frontal cortex	Streptozocin	0	LPDYKPYPMYPATTSLVNVVPK	21	1	ENSRNOT00000011052
Pre-frontal cortex	Streptozocin	0	CYSAEVVTLWYRPPDVLFGAK	3	1	ENSRNOT00000011052
Pre-frontal cortex	Streptozocin	0	SILFQILK	11	1	ENSRNOT00000011052
Pre-frontal cortex	Streptozocin	0	DTQTDSVSRYDSSSTSSSDR	1	5	ENSRNOT00000080285,ENSRNOT00000050037,Q10728,Q10728-2,Q10728-3
Pre-frontal cortex	Streptozocin	0	SWVYSPLHY	4	2	ENSRNOT00000061159,Q5I6B8
Pre-frontal cortex	Streptozocin	0	QTAASAGLVDAPAPSAASR	45	3	ENSRNOT00000011292,Q63537,Q63537-2
Pre-frontal cortex	Streptozocin	0	PPAQAPAPQPAPQPAPTPSVGSSFFSSLSQAVK	2	3	ENSRNOT00000011292,Q63537,Q63537-2
Pre-frontal cortex	Streptozocin	0	SFRPDF	2	3	ENSRNOT00000011292,Q63537,Q63537-2
Pre-frontal cortex	Streptozocin	0	FPLIEQTYYPN	16	3	ENSRNOT00000011292,Q63537,Q63537-2
Pre-frontal cortex	Streptozocin	0	PEPQQPPPAPGPGTATASAATSAASPGPER	1	3	ENSRNOT00000011292,Q63537,Q63537-2
Pre-frontal cortex	Streptozocin	0	SAGLVDAPAPSAASR	4	3	ENSRNOT00000011292,Q63537,Q63537-2
Pre-frontal cortex	Streptozocin	0	CYIASAGADALAK	6	2	ENSRNOT00000006527,P70483
Pre-frontal cortex	Streptozocin	0	FTVSALHGDMDQK	12	2	ENSRNOT00000002484,ENSRNOT00000089294
Pre-frontal cortex	Streptozocin	0	EELTLEGIK	1	2	ENSRNOT00000002484,ENSRNOT00000089294
Pre-frontal cortex	Streptozocin	0	DIVVLGVEK	11	3	ENSRNOT00000082686,P48004,P48004-2
Pre-frontal cortex	Streptozocin	0	SPEELEK	5	4	ENSRNOT00000032613,ENSRNOT00000082686,P48004,P48004-2
Pre-frontal cortex	Streptozocin	0	PVQSWLCDPDAMEQGETPLTMLQSQVPNIVK	6	1	ENSRNOT00000010720
Pre-frontal cortex	Streptozocin	0	NGEVQNLAVK	12	1	ENSRNOT00000010720
Pre-frontal cortex	Streptozocin	0	LGTLSALDILIK	15	1	ENSRNOT00000010720
Pre-frontal cortex	Streptozocin	0	NCIGDFLK	12	1	ENSRNOT00000010720
Pre-frontal cortex	Streptozocin	0	IDLRPVLGEGVPILASF	4	1	ENSRNOT00000010720
Pre-frontal cortex	Streptozocin	0	EAELDMNEELDKK	33	2	ENSRNOT00000003696,ENSRNOT00000092711
Pre-frontal cortex	Streptozocin	0	TLVGHDNWVR	9	2	ENSRNOT00000003696,ENSRNOT00000092711
Pre-frontal cortex	Streptozocin	0	LRPEVLQDLR	16	1	ENSRNOT00000007374
Pre-frontal cortex	Streptozocin	0	HRPDLIDYSK	9	1	ENSRNOT00000024098
Pre-frontal cortex	Streptozocin	0	SIEEIQSLITAHEQFK	2	1	ENSRNOT00000024098
Pre-frontal cortex	Streptozocin	0	THCGNVLQPYLK	19	1	Q568Z9
Pre-frontal cortex	Streptozocin	0	TEYSVAVQTAVK	12	1	Q568Z9
Pre-frontal cortex	Streptozocin	0	SQGPALTASQSVHEQPTK	17	2	ENSRNOT00000016799,ENSRNOT00000086399
Pre-frontal cortex	Streptozocin	0	FQSFIESCLVK	1	2	ENSRNOT00000016799,ENSRNOT00000086399
Pre-frontal cortex	Streptozocin	0	TLAQLQQEFQR	7	2	ENSRNOT00000000553,ENSRNOT00000092723
Pre-frontal cortex	Streptozocin	0	EELALLDGSNVVFK	14	1	ENSRNOT00000000553
Pre-frontal cortex	Streptozocin	0	LLGPVLVK	12	2	ENSRNOT00000000553,ENSRNOT00000092723
Pre-frontal cortex	Streptozocin	0	MKDLQEPEEYSAGDLDHDLSIKK	4	2	ENSRNOT00000059431,ENSRNOT00000050819
Pre-frontal cortex	Streptozocin	0	MDYFLDVESAHR	17	1	P62024
Pre-frontal cortex	Streptozocin	0	LQLVEAECK	1	1	ENSRNOT00000013378
Pre-frontal cortex	Streptozocin	0	EGTQASEGYFSQSQEEEFAQSEEPCAK	1	1	ENSRNOT00000019569
Pre-frontal cortex	Streptozocin	0	QKHTGAVR	1	1	ENSRNOT00000035758
Pre-frontal cortex	Streptozocin	0	VLPIMVR	1	3	ENSRNOT00000010824,O55007,O55007-3
Pre-frontal cortex	Streptozocin	0	VFFVHEGYQGLVDGGEHIR	40	1	P47858
Pre-frontal cortex	Streptozocin	0	FANTPDSGCVLGMR	10	1	P47858
Pre-frontal cortex	Streptozocin	0	GQDPVVPAPTK	14	2	ENSRNOT00000034389,Q63560
Pre-frontal cortex	Streptozocin	0	DQGAVLLGPMK	9	2	ENSRNOT00000034389,Q63560
Pre-frontal cortex	Streptozocin	0	DQSFPAPAPTPLKDPGPVIPEPEKDGAPMVPER	2	2	ENSRNOT00000034389,Q63560
Pre-frontal cortex	Streptozocin	0	INLPESFDAR	3	2	ENSRNOT00000014177,P00787
Pre-frontal cortex	Streptozocin	0	VQALAEETAQNLK	5	1	O54924
Pre-frontal cortex	Streptozocin	0	TLTTLLEK	7	1	O54924
Pre-frontal cortex	Streptozocin	0	AHTDFFEAFK	16	2	P61203,P61203-2
Pre-frontal cortex	Streptozocin	0	VTLSFPSTLQTGTGTLK	13	1	ENSRNOT00000031045
Pre-frontal cortex	Streptozocin	0	GMNMYLTK	10	1	ENSRNOT00000031045
Pre-frontal cortex	Streptozocin	0	AQELDALDNSHPIEVSVGHPSEVDEIFDAISYSK	16	1	ENSRNOT00000031045
Pre-frontal cortex	Streptozocin	0	ETALLIDPK	9	1	ENSRNOT00000031045
Pre-frontal cortex	Streptozocin	0	IDFVGELNDK	10	1	ENSRNOT00000031045
Pre-frontal cortex	Streptozocin	0	AFPCWDEPAIK	17	1	ENSRNOT00000031045
Pre-frontal cortex	Streptozocin	0	AQELDALDNSHPIEVSVGHPSEVDEIFDAISY	1	1	ENSRNOT00000031045
Pre-frontal cortex	Streptozocin	0	KQQLEAEMEHR	4	2	ENSRNOT00000091015,ENSRNOT00000060410
Pre-frontal cortex	Streptozocin	0	HIIQNALAHCCLAGK	1	2	ENSRNOT00000091015,ENSRNOT00000060410
Pre-frontal cortex	Streptozocin	0	ANDTQEFNLSAYFER	21	2	ENSRNOT00000084217,ENSRNOT00000055194
Pre-frontal cortex	Streptozocin	0	QLASEDISHITPTQGFNIK	17	2	ENSRNOT00000027093,P37996
Pre-frontal cortex	Streptozocin	0	VAAAESMPLLLECAR	13	1	ENSRNOT00000014859
Pre-frontal cortex	Streptozocin	0	VSDILHSIFSSYK	24	2	ENSRNOT00000014859,ENSRNOT00000072538
Pre-frontal cortex	Streptozocin	0	SLLIPYLDNLVK	15	2	ENSRNOT00000014859,ENSRNOT00000072538
Pre-frontal cortex	Streptozocin	0	AGFGGSHISGYATLR	1	1	ENSRNOT00000036194
Pre-frontal cortex	Streptozocin	0	AALEYLEDIDLK	11	1	ENSRNOT00000014819
Pre-frontal cortex	Streptozocin	0	THPGPTPTPDHKPPK	7	2	ENSRNOT00000016070,Q9QXY2-2
Pre-frontal cortex	Streptozocin	0	TLVEEER	2	2	ENSRNOT00000016070,Q9QXY2-2
Pre-frontal cortex	Streptozocin	0	GLDFEIPPPSPPLNLHELSGPAEGTPLTPK	1	2	ENSRNOT00000016070,Q9QXY2-2
Pre-frontal cortex	Streptozocin	0	PASTPPIMASAIKDEDDEER	2	2	ENSRNOT00000016070,Q9QXY2-2
Pre-frontal cortex	Streptozocin	0	FYDLSSK	2	1	ENSRNOT00000019642
Pre-frontal cortex	Streptozocin	0	WDTCAPEVILHAVGGK	5	2	ENSRNOT00000088921,Q9Z1N4
Pre-frontal cortex	Streptozocin	0	CVIAEGDLGIVQK	14	2	ENSRNOT00000088921,Q9Z1N4
Pre-frontal cortex	Streptozocin	0	IIQLIEGK	14	2	ENSRNOT00000088921,Q9Z1N4
Pre-frontal cortex	Streptozocin	0	SAIKEEDLVVWVDPVDGTK	1	2	ENSRNOT00000088921,Q9Z1N4
Pre-frontal cortex	Streptozocin	0	QVEDDIQQLLK	10	2	ENSRNOT00000016450,Q63347
Pre-frontal cortex	Streptozocin	0	QTLQSEQPLQVAR	12	2	ENSRNOT00000016450,Q63347
Pre-frontal cortex	Streptozocin	0	IEFSLPDLEGR	13	2	ENSRNOT00000016450,Q63347
Pre-frontal cortex	Streptozocin	0	REYYFAITMER	21	1	ENSRNOT00000065195
Pre-frontal cortex	Streptozocin	0	LSEIVTLAK	13	1	ENSRNOT00000065195
Pre-frontal cortex	Streptozocin	0	SFQGPVLIGSSQGGVNIEDVAAENPEAIVKEPVDIIEGVK	1	1	ENSRNOT00000065195
Pre-frontal cortex	Streptozocin	0	LVGEFLEVTCISPTFICDHPQIMSPLAK	27	1	ENSRNOT00000046126
Pre-frontal cortex	Streptozocin	0	ICNAYTELNDPVR	4	1	ENSRNOT00000046126
Pre-frontal cortex	Streptozocin	0	SEEEFVHINNK	7	1	ENSRNOT00000046126
Pre-frontal cortex	Streptozocin	0	TLFSVLPGLK	10	2	ENSRNOT00000048344,ENSRNOT00000061294
Pre-frontal cortex	Streptozocin	0	AHIQFKPTLSQQR	2	2	ENSRNOT00000048344,ENSRNOT00000061294
Pre-frontal cortex	Streptozocin	0	LYAGYGLSESTGPHFMSSPYNYR	22	2	ENSRNOT00000088208,ENSRNOT00000016104
Pre-frontal cortex	Streptozocin	0	FSISGGELGPTMK	2	2	ENSRNOT00000088208,ENSRNOT00000016104
Pre-frontal cortex	Streptozocin	0	KSADTLWDIQK	15	1	ENSRNOT00000017965
Pre-frontal cortex	Streptozocin	0	IHPVSTMVK	23	1	ENSRNOT00000017965
Pre-frontal cortex	Streptozocin	0	VVVTAGVR	6	1	ENSRNOT00000017965
Pre-frontal cortex	Streptozocin	0	LDTNTSTYLMSLLANDTLNIVASDHRPF	24	1	ENSRNOT00000012273
Pre-frontal cortex	Streptozocin	0	VITIANR	10	1	ENSRNOT00000012273
Pre-frontal cortex	Streptozocin	0	TSLVEAYEK	1	1	ENSRNOT00000012273
Pre-frontal cortex	Streptozocin	0	SEIANIQSGADSLPCLELPCDLSFK	48	2	ENSRNOT00000006443,Q9JK11
Pre-frontal cortex	Streptozocin	0	TSNPFLVAVQDSEADYVTTDTLSK	13	2	ENSRNOT00000006443,Q9JK11
Pre-frontal cortex	Streptozocin	0	QVCPLTPGPGK	5	2	ENSRNOT00000083490,ENSRNOT00000030745
Pre-frontal cortex	Streptozocin	0	LQPIALSCVLNIGACK	23	1	Q6DGG0
Pre-frontal cortex	Streptozocin	0	ILLISEDLK	13	1	Q6DGG0
Pre-frontal cortex	Streptozocin	0	VVQDTYQIMK	12	3	ENSRNOT00000054966,Q9JJ50,Q9JJ50-2
Pre-frontal cortex	Streptozocin	0	NPHVALYALEVMESVVK	18	3	ENSRNOT00000054966,Q9JJ50,Q9JJ50-2
Pre-frontal cortex	Streptozocin	0	HHPEDVEPAVR	23	1	ENSRNOT00000023072
Pre-frontal cortex	Streptozocin	0	ENLQHWSYFEK	9	1	ENSRNOT00000038439
Pre-frontal cortex	Streptozocin	0	LAIQGPEDSPSR	10	1	ENSRNOT00000022467
Pre-frontal cortex	Streptozocin	0	DVEPEDPMFLMDPFAIHR	21	1	ENSRNOT00000022467
Pre-frontal cortex	Streptozocin	0	AYWLLEEMLTK	13	1	ENSRNOT00000066901
Pre-frontal cortex	Streptozocin	0	VLEDQLTQILR	2	1	ENSRNOT00000001826
Pre-frontal cortex	Streptozocin	0	MALLNIFAPK	6	1	ENSRNOT00000001826
Pre-frontal cortex	Streptozocin	0	VVINVPIFK	13	1	ENSRNOT00000033196
Pre-frontal cortex	Streptozocin	0	SLFFPDEAINK	12	1	ENSRNOT00000033196
Pre-frontal cortex	Streptozocin	0	GFFCDAALDVDGETLR	24	1	ENSRNOT00000028096
Pre-frontal cortex	Streptozocin	0	EPETQPVCFFR	11	1	ENSRNOT00000028096
Pre-frontal cortex	Streptozocin	0	SWTWPEGPEQTLHCEAR	21	1	ENSRNOT00000028096
Pre-frontal cortex	Streptozocin	0	ASLTLTLLR	14	1	ENSRNOT00000028096
Pre-frontal cortex	Streptozocin	0	GYTLVEYETYK	13	1	ENSRNOT00000028807
Pre-frontal cortex	Streptozocin	0	LVAIVDVIDQNR	14	5	ENSRNOT00000040851,ENSRNOT00000063787,ENSRNOT00000083427,ENSRNOT00000014838,Q63507
Pre-frontal cortex	Streptozocin	0	NCIQLAACEAHELLPMIPDLPADLFTSCLTTPIK	3	1	ENSRNOT00000005337
Pre-frontal cortex	Streptozocin	0	VCADLIR	12	1	P60868
Pre-frontal cortex	Streptozocin	0	QVVPEKPVK	1	1	ENSRNOT00000074446
Pre-frontal cortex	Streptozocin	0	NPVWNETLQYHGITEEDMQR	21	2	ENSRNOT00000001844,P47709
Pre-frontal cortex	Streptozocin	0	WTSQHTDTLTLGK	1	1	ENSRNOT00000036959
Pre-frontal cortex	Streptozocin	0	EGAIIYVIK	8	3	ENSRNOT00000091023,ENSRNOT00000057572,ENSRNOT00000050179
Pre-frontal cortex	Streptozocin	0	ELYLFDVLR	9	1	ENSRNOT00000083481
Pre-frontal cortex	Streptozocin	0	LFPGFEIETVK	2	1	ENSRNOT00000083481
Pre-frontal cortex	Streptozocin	0	LLDIACWVH	16	2	ENSRNOT00000027407,P24268
Pre-frontal cortex	Streptozocin	0	AILEFAER	8	2	ENSRNOT00000023831,ENSRNOT00000091128
Pre-frontal cortex	Streptozocin	0	LKPHEEPLR	1	2	ENSRNOT00000023831,ENSRNOT00000091128
Pre-frontal cortex	Streptozocin	0	ELQTMVEHHLGQQK	9	1	ENSRNOT00000055271
Pre-frontal cortex	Streptozocin	0	TLEELILLSR	7	1	ENSRNOT00000092756
Pre-frontal cortex	Streptozocin	0	FVVLADPR	4	3	ENSRNOT00000016145,ENSRNOT00000088471,Q69BT7
Pre-frontal cortex	Streptozocin	0	LLMTEVAWTK	1	1	P35559
Pre-frontal cortex	Streptozocin	0	GLPLFPLVK	4	1	P35559
Pre-frontal cortex	Streptozocin	0	IYDAQNELSAATHLTSK	16	1	ENSRNOT00000018413
Pre-frontal cortex	Streptozocin	0	QFYFTQGGNLMSQAR	1	1	ENSRNOT00000018413
Pre-frontal cortex	Streptozocin	0	ELGITALHIK	22	2	ENSRNOT00000036330,P13471
Pre-frontal cortex	Streptozocin	0	ALIVLAHAER	12	1	ENSRNOT00000017174
Pre-frontal cortex	Streptozocin	0	GELLVIIEKPEEQWWSAR	4	1	ENSRNOT00000002552
Pre-frontal cortex	Streptozocin	0	CLNNLAASQLK	1	1	ENSRNOT00000077756
Pre-frontal cortex	Streptozocin	0	HIFWGSGSHTLSALVENLR	2	1	ENSRNOT00000002407
Pre-frontal cortex	Streptozocin	0	IGGGVGFGGLEAMNSMAGFGGVGR	3	2	ENSRNOT00000007103,ENSRNOT00000081533
Pre-frontal cortex	Streptozocin	0	NLPFDLTWQK	12	2	ENSRNOT00000007103,ENSRNOT00000081533
Pre-frontal cortex	Streptozocin	0	GLEMLVLTATPVTPK	1	2	ENSRNOT00000043201,ENSRNOT00000084049
Pre-frontal cortex	Streptozocin	0	LFEDMVTK	1	2	ENSRNOT00000043201,ENSRNOT00000084049
Pre-frontal cortex	Streptozocin	0	HTLITEMVALNPDFKPPADYKPPATR	4	2	ENSRNOT00000028628,ENSRNOT00000044866
Pre-frontal cortex	Streptozocin	0	DLALFFSLNPIR	1	1	ENSRNOT00000011326
Pre-frontal cortex	Streptozocin	0	TFYNLTTVALHDWATYSEMR	1	1	ENSRNOT00000011326
Pre-frontal cortex	Streptozocin	0	LQLLLLNPLK	19	1	ENSRNOT00000005654
Pre-frontal cortex	Streptozocin	0	SFQEILQIVSPAR	1	1	ENSRNOT00000005654
Pre-frontal cortex	Streptozocin	0	GTWEKPGGEAPMGYDFWYQPR	4	1	Q8VIF7
Pre-frontal cortex	Streptozocin	0	LSPADDELYQR	4	4	ENSRNOT00000027262,O08776-2,O08776-3,O08776-4
Pre-frontal cortex	Streptozocin	0	LLELDSFLK	15	3	ENSRNOT00000005562,ENSRNOT00000076727,ENSRNOT00000027957
Pre-frontal cortex	Streptozocin	0	SLVDTVYALK	12	4	ENSRNOT00000043449,ENSRNOT00000001158,ENSRNOT00000017947,Q5XXR3
Pre-frontal cortex	Streptozocin	0	YKVTKFYTAPTAIR	1	1	ENSRNOT00000064013
Pre-frontal cortex	Streptozocin	0	LQLVEMPLAHK	4	2	ENSRNOT00000086091,P29457
Pre-frontal cortex	Streptozocin	0	LQEEGSVEAR	7	1	ENSRNOT00000025626
Pre-frontal cortex	Streptozocin	0	IATITTTHAPSQQGTQETR	12	5	ENSRNOT00000037848,ENSRNOT00000083271,ENSRNOT00000071315,Q4L1J4,Q4L1J4-2
Pre-frontal cortex	Streptozocin	0	VVTCEVDAEPPK	2	1	ENSRNOT00000018897
Pre-frontal cortex	Streptozocin	0	LLGLM[15.9949]SLPTK	1	1	ENSRNOT00000015602
Pre-frontal cortex	Streptozocin	0	VHNDAQNFDYDHDAFLGAEEAK	3	2	ENSRNOT00000008356,O35783
Pre-frontal cortex	Streptozocin	0	IWLGLFDDR	1	3	ENSRNOT00000021309,ENSRNOT00000087754,Q4KLH5
Pre-frontal cortex	Streptozocin	0	ETADIHLLICTIDDLIDK	12	1	Q5I0K5
Pre-frontal cortex	Streptozocin	0	MIEEDTEEEEDK	3	1	ENSRNOT00000026165
Pre-frontal cortex	Streptozocin	0	LFVGMLNK	3	1	ENSRNOT00000061219
Pre-frontal cortex	Streptozocin	0	GSLEVLSLK	1	1	ENSRNOT00000001190
Pre-frontal cortex	Streptozocin	0	GLEHVTVDDLVAEITPK	19	1	ENSRNOT00000006402
Pre-frontal cortex	Streptozocin	0	M[15.9949]AASLSELSGSVAQTVTQVQTTLASVQELLR	3	1	ENSRNOT00000018167
Pre-frontal cortex	Streptozocin	0	IFTTAAVVLGK	9	2	ENSRNOT00000080165,Q99JE4
Pre-frontal cortex	Streptozocin	0	FLSIDFLNTFLHTYR	18	2	ENSRNOT00000080165,Q99JE4
Pre-frontal cortex	Streptozocin	0	GEENLAGWRPR	14	6	ENSRNOT00000036061,ENSRNOT00000077784,ENSRNOT00000086226,ENSRNOT00000078830,O88658,O88658-2
Pre-frontal cortex	Streptozocin	0	LDNVMLDAEGHIK	12	1	ENSRNOT00000080032
Pre-frontal cortex	Streptozocin	0	LGSGPDGEPTIR	12	1	ENSRNOT00000080032
Pre-frontal cortex	Streptozocin	0	SSPTFCDHCGSLLYGLVHQGMK	1	1	ENSRNOT00000080032
Pre-frontal cortex	Streptozocin	0	TQEQISNVK	4	1	ENSRNOT00000075983
Pre-frontal cortex	Streptozocin	0	VDYILSVMNVPNFDFPPEFYEHAK	12	3	P63095,P63095-2,Q63803
Pre-frontal cortex	Streptozocin	0	AENSSLNLIGK	12	3	ENSRNOT00000087824,ENSRNOT00000006361,Q9QUL6
Pre-frontal cortex	Streptozocin	0	SQLSCVVVDDIER	12	3	ENSRNOT00000087824,ENSRNOT00000006361,Q9QUL6
Pre-frontal cortex	Streptozocin	0	IIIFDEIDAICK	14	3	ENSRNOT00000087824,ENSRNOT00000006361,Q9QUL6
Pre-frontal cortex	Streptozocin	0	GILLYGPPGCGK	15	3	ENSRNOT00000087824,ENSRNOT00000006361,Q9QUL6
Pre-frontal cortex	Streptozocin	0	DIEAMDPSILK	6	3	ENSRNOT00000087824,ENSRNOT00000006361,Q9QUL6
Pre-frontal cortex	Streptozocin	0	LLMLIEMSLQMDPEYR	4	3	ENSRNOT00000087824,ENSRNOT00000006361,Q9QUL6
Pre-frontal cortex	Streptozocin	0	DVLQEMEMLNAF	10	3	ENSRNOT00000087824,ENSRNOT00000006361,Q9QUL6
Pre-frontal cortex	Streptozocin	0	THPSVVPGCIAF	5	3	ENSRNOT00000087824,ENSRNOT00000006361,Q9QUL6
Pre-frontal cortex	Streptozocin	0	FQM[15.9949]PDQGMTSADDFFQGTK	5	1	ENSRNOT00000012996
Pre-frontal cortex	Streptozocin	0	M[15.9949]VIPGGIDVHTR	12	1	ENSRNOT00000012996
Pre-frontal cortex	Streptozocin	0	AENGDIIAEEQQR	14	1	ENSRNOT00000012996
Pre-frontal cortex	Streptozocin	0	VIPGGIDVHTR	27	1	ENSRNOT00000012996
Pre-frontal cortex	Streptozocin	0	VFNLYPR	12	1	ENSRNOT00000012996
Pre-frontal cortex	Streptozocin	0	MGGPYGGGNYGPGGSGGSGGYGGR	9	6	ENSRNOT00000015152,ENSRNOT00000015325,A7VJC2,A7VJC2-2,A7VJC2-3,A7VJC2-4
Pre-frontal cortex	Streptozocin	0	GFGFVTFSSMAEVDAAMAARPH	5	6	ENSRNOT00000015152,ENSRNOT00000015325,A7VJC2,A7VJC2-2,A7VJC2-3,A7VJC2-4
Pre-frontal cortex	Streptozocin	0	CRAPEVSQHDIQAYETILK	2	2	P52303,P52303-2
Pre-frontal cortex	Streptozocin	0	M[15.9949]EDTEPFSAELLSAMMR	18	2	ENSRNOT00000026373,P59215-2
Pre-frontal cortex	Streptozocin	0	EIYCHM[15.9949]TCATDTNNIQVVFDAVTDIIIANNLR	16	1	ENSRNOT00000026373
Pre-frontal cortex	Streptozocin	0	VCDVVSR	5	2	ENSRNOT00000026373,P59215-2
Pre-frontal cortex	Streptozocin	0	VLGLLPEEITAMLR	5	1	ENSRNOT00000091760
Pre-frontal cortex	Streptozocin	0	MGSGIQYGDISLR	12	1	ENSRNOT00000002052
Pre-frontal cortex	Streptozocin	0	QDSNHTIGVEFGSR	1	1	ENSRNOT00000002052
Pre-frontal cortex	Streptozocin	0	INNVIDNLIVAPGTFEVQIEEVR	29	1	ENSRNOT00000077362
Pre-frontal cortex	Streptozocin	0	KEETLLDLDFDPFKPDVTPAGSAAATHSPMSQ	6	4	ENSRNOT00000084702,ENSRNOT00000080800,ENSRNOT00000017102,O08838
Pre-frontal cortex	Streptozocin	0	VETLHDFEAANSDELTLQR	56	4	ENSRNOT00000084702,ENSRNOT00000080800,ENSRNOT00000017102,O08838
Pre-frontal cortex	Streptozocin	0	HHLEALQSSK	16	4	ENSRNOT00000084702,ENSRNOT00000080800,ENSRNOT00000017102,O08838
Pre-frontal cortex	Streptozocin	0	SDVWSFGILLTELTTK	21	2	ENSRNOT00000012739,Q9WUD9-2
Pre-frontal cortex	Streptozocin	0	VADFGLAR	5	2	ENSRNOT00000012739,Q9WUD9-2
Pre-frontal cortex	Streptozocin	0	RPHSVIGGSLGSFM[15.9949]AMPR	1	2	ENSRNOT00000005762,O35831
Pre-frontal cortex	Streptozocin	0	GVTIKPTVDDD	3	1	P81795
Pre-frontal cortex	Streptozocin	0	TSFDKPDQMAALFK	17	2	ENSRNOT00000064851,P55161
Pre-frontal cortex	Streptozocin	0	AINQIAAALF	5	2	ENSRNOT00000064851,P55161
Pre-frontal cortex	Streptozocin	0	SIQAAVSVDPFYEMLAAR	14	2	ENSRNOT00000028588,P63035
Pre-frontal cortex	Streptozocin	0	NLSQNVQEDDLQHLQLFTEYGR	17	1	ENSRNOT00000046085
Pre-frontal cortex	Streptozocin	0	VSGNQHEELQNVR	12	1	ENSRNOT00000046085
Pre-frontal cortex	Streptozocin	0	AIADNVKDWCK	18	1	P48500
Pre-frontal cortex	Streptozocin	0	CPEALFQPSFLGMESC	25	3	ENSRNOT00000080216,P60711,P63259
Pre-frontal cortex	Streptozocin	0	TTGIVM[15.9949]DSGDGVTHTVPIYEGYALPH	29	3	ENSRNOT00000080216,P60711,P63259
Pre-frontal cortex	Streptozocin	0	GIVTNWDDMEK	14	3	ENSRNOT00000080216,P60711,P63259
Pre-frontal cortex	Streptozocin	0	TEQGPQVDETQFK	13	2	ENSRNOT00000001816,P11884
Pre-frontal cortex	Streptozocin	0	EHGLIFMETSAK	14	2	ENSRNOT00000060467,P05712
Pre-frontal cortex	Streptozocin	0	GEMSNPGEVCSALNLCQS	3	2	ENSRNOT00000000696,P10960
Pre-frontal cortex	Streptozocin	0	SLPCDICK	20	2	ENSRNOT00000000696,P10960
Pre-frontal cortex	Streptozocin	0	EEILAALEK	6	2	ENSRNOT00000000696,P10960
Pre-frontal cortex	Streptozocin	0	YEGSGDGGAAAQSLY	1	2	ENSRNOT00000046388,ENSRNOT00000086036
[truncated: 184,279 more rows]
