# Supplementary material for: Proteomic Analysis of a Rat Streptozotocin Model Shows Dysregulated Biological Pathways Implicated in Alzheimer’s Disease
Source: Int J Mol Sci. 2024 Feb 28;25(5):2772. doi: 10.3390/ijms25052772 (PMC10931650; doi:10.3390/ijms25052772)
Supplement: Supplementary file 1 [file ijms-25-02772-s001.zip › Table S3.xlsx]

## Sheet: S3
Supplementary Table S3. Protein quantification (normalized XIC) in the prefrontal cortex and hippocampus proteomes of the streptozotocin rat model and control (wild-type)
Dataset	Locus	Gene	Control 1	Control 2	Control 3	Control 4	Control 5	Control 6	Streptozotocin 1	Streptozotocin 2	Streptozotocin 3	Streptozotocin 4	Streptozotocin 5	Streptozotocin 6	Total Signal	Replicate Count	Description
Prefrontal-cortex	P30904	Mif	0.000703146	0.000572351	0.000120815	9.08686e-05	0.000164227	0.00014332	0.000153632	0.000161063	0.000531907	0.000126967	8.83706e-05	0.000642356	0.00349902	12	Macrophage migration inhibitory factor OS=Rattus norvegicus OX=10116 GN=Mif PE=1 SV=4
Prefrontal-cortex	Q05683	Gad2	0.000103658	6.68824e-05	0.000119252	8.15655e-05	9.60656e-05	0.000120125	8.26492e-05	0.000237087	0.000171188	0.000173761	0.000309384	0.000200342	0.00176196	12	Glutamate decarboxylase 2 OS=Rattus norvegicus OX=10116 GN=Gad2 PE=1 SV=1
Prefrontal-cortex	P34926	Map1a	0.000740593	0.000904083	0.000987621	0.000508907	0.00103041	0.000936366	0.000797623	0.000939499	0.000903378	0.000819732	0.000870676	0.000884576	0.0103235	12	Microtubule-associated protein 1A OS=Rattus norvegicus OX=10116 GN=Map1a PE=1 SV=1
Prefrontal-cortex	P08413	Camk2b	0.000212065	0.000357657	0.000256429	0.000214408	0.000195079	0.000140013	9.78503e-05	0.000204489	0.000174529	0.000220634	2.87089e-05	0.000128914	0.00223078	12	Calcium/calmodulin-dependent protein kinase type II subunit beta OS=Rattus norvegicus OX=10116 GN=Camk2b PE=1 SV=1
Prefrontal-cortex	P28480	Tcp1	0.000171219	0.000146268	0.000264179	0.000126375	0.000121045	0.000168842	0.000370088	0.000383088	0.000154228	0.000195284	0.000228287	0.000309597	0.0026385	12	T-complex protein 1 subunit alpha OS=Rattus norvegicus OX=10116 GN=Tcp1 PE=1 SV=1
Prefrontal-cortex	P63018	Hspa8	0.00161948	0.00117185	0.00188421	0.0010822	0.00178786	0.00192599	0.00135972	0.0017062	0.0014958	0.00187157	0.00179874	0.00172473	0.0194284	12	Heat shock cognate 71 kDa protein OS=Rattus norvegicus OX=10116 GN=Hspa8 PE=1 SV=1
Prefrontal-cortex	Q08163	Cap1	0.000198727	0.000145968	0.000214303	0.000136726	0.000233016	0.000235824	0.000187771	0.000260882	0.000273416	0.000229784	0.000311373	0.000292699	0.00272049	12	Adenylyl cyclase-associated protein 1 OS=Rattus norvegicus OX=10116 GN=Cap1 PE=1 SV=3
Prefrontal-cortex	P10111	Ppia	0.00387987	0.00367073	0.00288675	0.00253017	0.00360161	0.00323284	0.00290302	0.0032023	0.00265086	0.0039843	0.00288838	0.00357831	0.0390092	12	Peptidyl-prolyl cis-trans isomerase A OS=Rattus norvegicus OX=10116 GN=Ppia PE=1 SV=2
Prefrontal-cortex	P34058	Hsp90ab1	0.000613809	0.000582075	0.000598484	0.000423083	0.000702605	0.000720863	0.000603858	0.00103897	0.000684548	0.000612675	0.000729137	0.00082848	0.00813859	12	Heat shock protein HSP 90-beta OS=Rattus norvegicus OX=10116 GN=Hsp90ab1 PE=1 SV=4
Prefrontal-cortex	B2RYG6	Otub1	0.00038568	0.000280926	0.000241823	0.000174957	0.000226108	0.000308949	0.00019506	0.000342752	0.00027402	0.00024619	0.000253173	0.000386518	0.00331616	12	Ubiquitin thioesterase OTUB1 OS=Rattus norvegicus OX=10116 GN=Otub1 PE=1 SV=1
Prefrontal-cortex	Q6NYB7	Rab1A	3.55301e-05	4.91139e-05	5.09342e-05	4.65081e-05	1.51509e-05	4.4007e-05	4.08629e-05	4.39143e-05	2.90285e-05	3.19449e-05	2.68124e-05	1.91123e-05	0.000432919	12	Ras-related protein Rab-1A OS=Rattus norvegicus OX=10116 GN=Rab1A PE=1 SV=3
Prefrontal-cortex	Q8VHF5	Cs	0.000854163	0.00066876	0.00119931	0.000895764	0.000827262	0.000933491	0.000869019	0.00106975	0.000708307	0.00110273	0.00135355	0.000874021	0.0113561	12	Citrate synthase, mitochondrial OS=Rattus norvegicus OX=10116 GN=Cs PE=1 SV=1
Prefrontal-cortex	B2GV06	Oxct1	0.000117114	6.12277e-05	0.000178992	0.000117512	0.000174542	0.000181229	0.000113457	0.000107517	8.05264e-05	0.000143035	0.000105042	0.000111094	0.00149129	12	Succinyl-CoA:3-ketoacid coenzyme A transferase 1, mitochondrial OS=Rattus norvegicus OX=10116 GN=Oxct1 PE=1 SV=1
Prefrontal-cortex	P60881	Snap25		6.88739e-05	5.83781e-05	3.2801e-05	4.33989e-05	3.99046e-05	1.02741e-05		1.96992e-05	5.14309e-05	2.46252e-05	1.52652e-05	0.000364651	10	Synaptosomal-associated protein 25 OS=Rattus norvegicus OX=10116 GN=Snap25 PE=1 SV=1
Prefrontal-cortex	P55067	Ncan	2.86231e-05	0.000127289	0.000143284	3.41589e-05	7.83337e-05	0.000136359	8.10947e-05	0.000122203	0.00011319	0.000153611	0.000117401	0.000137669	0.00127322	12	Neurocan core protein OS=Rattus norvegicus OX=10116 GN=Ncan PE=1 SV=1
Prefrontal-cortex	Q9QXQ0	Actn4	8.83462e-05	0.000208753	0.000284355	0.000143412	0.000111651	0.000196446	0.000227029	0.000104162	4.71919e-05	0.000140621	9.39746e-05	8.67678e-05	0.00173271	12	Alpha-actinin-4 OS=Rattus norvegicus OX=10116 GN=Actn4 PE=1 SV=2
Prefrontal-cortex	Q4FZT2	Ppme1	0.000138494	0.000123821	8.20755e-05	9.64861e-05	0.000116411	0.00011653	4.42272e-05	8.48608e-05	6.66509e-05	8.8768e-05	9.58102e-05	0.000101185	0.00115532	12	Protein phosphatase methylesterase 1 OS=Rattus norvegicus OX=10116 GN=Ppme1 PE=1 SV=2
Prefrontal-cortex	P17764	Acat1	8.96999e-05	8.00642e-05	0.000313251	9.81396e-05	0.000190122	0.000212761	0.000271194	0.000179601	0.000213961	0.000298206	0.000292858	0.000145909	0.00238577	12	Acetyl-CoA acetyltransferase, mitochondrial OS=Rattus norvegicus OX=10116 GN=Acat1 PE=1 SV=1
Prefrontal-cortex	Q91Y78	Uchl3	0.000129565		8.38433e-06	4.68027e-06	1.39485e-05	1.34251e-05	9.65355e-05	9.27695e-05	3.11883e-06	7.85902e-05	9.65014e-06	5.49198e-06	0.000456159	11	Ubiquitin carboxyl-terminal hydrolase isozyme L3 OS=Rattus norvegicus OX=10116 GN=Uchl3 PE=1 SV=1
Prefrontal-cortex	P27139	Ca2	0.000121583	9.07934e-05	0.000107916	6.66429e-05	0.000120534	0.000170336	0.000116495	0.000133725	0.000168123	0.00012651	0.000136399	0.000168327	0.00152738	12	Carbonic anhydrase 2 OS=Rattus norvegicus OX=10116 GN=Ca2 PE=1 SV=2
Prefrontal-cortex	Q6P7B0	Wars1	3.00608e-05	3.30988e-05	2.56043e-05	2.8274e-05	3.23565e-05	2.70229e-05	3.69564e-05	5.4384e-05	2.57076e-05	6.33491e-05	3.90863e-05	3.7314e-05	0.000433215	12	Tryptophan--tRNA ligase, cytoplasmic OS=Rattus norvegicus OX=10116 GN=Wars1 PE=1 SV=2
Prefrontal-cortex	Q6PST4	Atl1	0.000104642	0.00014728	0.000127701	9.61687e-05	0.000100027	8.86731e-05	0.000146751	8.43171e-05	8.77213e-05	0.000101977	0.000141248	0.000127215	0.00135372	12	Atlastin-1 OS=Rattus norvegicus OX=10116 GN=Atl1 PE=1 SV=1
Prefrontal-cortex	P23358	Rpl12	4.14451e-05	6.55733e-05	5.71819e-05	1.49517e-05	3.84238e-05	4.96311e-05	8.4468e-05	5.9997e-05	5.83637e-05	8.29633e-05	8.33089e-05	8.25456e-05	0.000718853	12	60S ribosomal protein L12 OS=Rattus norvegicus OX=10116 GN=Rpl12 PE=2 SV=1
Prefrontal-cortex	P63029	Tpt1	5.50682e-05	8.37811e-05	3.09101e-05	1.20968e-05	2.33984e-05	3.84076e-05	3.3256e-05	4.04686e-05	8.40407e-05	5.53386e-05	3.1232e-05	8.93411e-05	0.000577339	12	Translationally-controlled tumor protein OS=Rattus norvegicus OX=10116 GN=Tpt1 PE=1 SV=1
Prefrontal-cortex	Q63570	Psmc4	2.53891e-05	1.22243e-05	2.71247e-05	1.80143e-05	2.45269e-05	2.75547e-05	3.34653e-05	6.95733e-05	1.51528e-05	2.04638e-05	3.62782e-05	3.89978e-05	0.000348765	12	26S proteasome regulatory subunit 6B OS=Rattus norvegicus OX=10116 GN=Psmc4 PE=1 SV=1
Prefrontal-cortex	P13596	Ncam1	0.000196429	0.000607104	0.000500804	0.00012789	0.000147107	0.000155224	0.000358991	9.7423e-05	0.000168069	0.000255171	0.000242188	0.00011417	0.00297057	12	Neural cell adhesion molecule 1 OS=Rattus norvegicus OX=10116 GN=Ncam1 PE=1 SV=1
Prefrontal-cortex	Q5XI78	Ogdh	0.000267731	0.000302174	0.000324612	0.000244777	0.000212742	0.000243501	0.000345192	0.00043331	0.000362872	0.000386781	0.000598924	0.000328282	0.0040509	12	2-oxoglutarate dehydrogenase, mitochondrial OS=Rattus norvegicus OX=10116 GN=Ogdh PE=1 SV=1
Prefrontal-cortex	D3ZW55	Itpa	4.53357e-05	0.000131358	9.72636e-05	4.02503e-05	6.98464e-05	8.19735e-05	2.96506e-05	4.61827e-05	4.17265e-05	3.93174e-05	5.03951e-05	6.34285e-05	0.000736728	12	Inosine triphosphate pyrophosphatase OS=Rattus norvegicus OX=10116 GN=Itpa PE=3 SV=1
Prefrontal-cortex	Q5XFW8	Sec13				4.55171e-06	5.0293e-06	7.27733e-06	1.95798e-06	5.13278e-06	4.32594e-06	4.91246e-06	6.5186e-06	7.78539e-06	4.74915e-05	9	Protein SEC13 homolog OS=Rattus norvegicus OX=10116 GN=Sec13 PE=1 SV=1
Prefrontal-cortex	Q05982	Nme1	0.000103212	0.00010579	0.000215926	0.000190814	0.000202723	0.000233762	0.000198251	0.000273402	0.000259949	0.000280686	0.000250698	0.000341675	0.00265689	12	Nucleoside diphosphate kinase A OS=Rattus norvegicus OX=10116 GN=Nme1 PE=1 SV=1
Prefrontal-cortex	P05712	Rab2a	0.000116586	0.000243665	0.000161193	7.89099e-05	0.000118592	0.00010993	0.000182065	0.000147341	0.000140877	0.000134506	0.000150335	0.000181965	0.00176597	12	Ras-related protein Rab-2A OS=Rattus norvegicus OX=10116 GN=Rab2a PE=2 SV=1
Prefrontal-cortex	P10687	Plcb1	0.000118986	0.000218016	0.000329736	6.47837e-05	8.75688e-05	5.1684e-05	0.000197683	8.78381e-05	5.47628e-05	0.000167517	0.000193216	6.54579e-05	0.00163725	12	1-phosphatidylinositol 4,5-bisphosphate phosphodiesterase beta-1 OS=Rattus norvegicus OX=10116 GN=Plcb1 PE=1 SV=1
Prefrontal-cortex	Q9Z272	Git1	1.84058e-05	1.61533e-05	1.25197e-05	1.2159e-05	1.13087e-05	1.74488e-05	1.79647e-05	2.58812e-05	2.00321e-05	3.00245e-05	9.3161e-06	3.09496e-05	0.000222164	12	ARF GTPase-activating protein GIT1 OS=Rattus norvegicus OX=10116 GN=Git1 PE=1 SV=1
Prefrontal-cortex	P09812	Pygm	0.000165598	0.000183245	0.000180992	0.000118149	0.000266964	0.000165131	9.95606e-05	0.000141448	0.000140073	0.000130784	0.000151033	0.000172971	0.00191595	12	Glycogen phosphorylase, muscle form OS=Rattus norvegicus OX=10116 GN=Pygm PE=1 SV=5
Prefrontal-cortex	Q9QWN8	Sptbn2	0.000518248	0.00176536	0.00154964	0.000454892	0.000711263	0.000813794	0.00116324	0.000814389	0.00133158	0.00101172	0.00124498	0.00102507	0.0124042	12	Spectrin beta chain, non-erythrocytic 2 OS=Rattus norvegicus OX=10116 GN=Sptbn2 PE=1 SV=2
Prefrontal-cortex	P12346	Tf	5.65719e-05	5.10908e-05	2.7457e-05	2.90126e-05	1.87432e-05	3.57307e-05	3.84408e-05	4.59394e-05	2.79326e-05	1.50596e-05	4.35365e-05	1.84501e-05	0.000407965	12	Serotransferrin OS=Rattus norvegicus OX=10116 GN=Tf PE=1 SV=3
Prefrontal-cortex	P05370	G6pdx	2.14437e-05	6.97416e-06	1.66293e-05	5.00628e-05	1.0536e-05	2.15719e-05	5.90172e-05	0.000107918	2.42536e-05	1.22865e-05	3.07548e-05	2.07273e-05	0.000382175	12	Glucose-6-phosphate 1-dehydrogenase OS=Rattus norvegicus OX=10116 GN=G6pdx PE=1 SV=3
Prefrontal-cortex	O88600	Hspa4	0.000334697	0.000267164	0.000407794	0.000298434	0.000473489	0.000421954	0.000409814	0.000503572	0.000342366	0.000486928	0.000465516	0.000443797	0.00485552	12	Heat shock 70 kDa protein 4 OS=Rattus norvegicus OX=10116 GN=Hspa4 PE=1 SV=1
Prefrontal-cortex	Q5XIM9	Cct2	0.000184905	0.000211867	0.000268737	0.000139499	0.000176455	0.000209371	0.000274346	0.00020383	0.000177302	0.000262939	0.000283231	0.000313024	0.00270551	12	T-complex protein 1 subunit beta OS=Rattus norvegicus OX=10116 GN=Cct2 PE=1 SV=3
Prefrontal-cortex	Q63092	Camkv	0.000349424	0.000347185	0.000355625	0.00021119	0.000272466	0.000319439	0.000287289	0.000299052	0.000222858	0.000305843	0.000240896	0.000329502	0.00354077	12	CaM kinase-like vesicle-associated protein OS=Rattus norvegicus OX=10116 GN=Camkv PE=1 SV=1
Prefrontal-cortex	P84092	Ap2m1	0.000305621	0.0006072	0.000624789	0.000229741	0.00048098	0.000443799	0.000811191	0.000474993	0.000347685	0.000617028	0.000804558	0.000395093	0.00614268	12	AP-2 complex subunit mu OS=Rattus norvegicus OX=10116 GN=Ap2m1 PE=1 SV=1
Prefrontal-cortex	P70566	Tmod2	1.67464e-05	4.53431e-05	0.000130066	1.72534e-05	3.19502e-05	5.35626e-05	0.00015866	0.000103238	2.65292e-05	0.000122612	5.3691e-05	3.71846e-05	0.000796836	12	Tropomodulin-2 OS=Rattus norvegicus OX=10116 GN=Tmod2 PE=1 SV=1
Prefrontal-cortex	P06686	Atp1a2	0.000100649	0.000591701	0.000450053	0.000142189	0.000174091	0.000131346	0.000332035	4.92713e-05	1.77595e-05	0.000220206	0.000185708	5.24468e-05	0.00244746	12	Sodium/potassium-transporting ATPase subunit alpha-2 OS=Rattus norvegicus OX=10116 GN=Atp1a2 PE=1 SV=1
Prefrontal-cortex	P18484	Ap2a2	0.000724582	0.00164738	0.00111276	0.00037408	0.000727567	0.000632134	0.0014125	0.000939024	0.000831123	0.00126892	0.00144135	0.00105964	0.0121711	12	AP-2 complex subunit alpha-2 OS=Rattus norvegicus OX=10116 GN=Ap2a2 PE=1 SV=3
Prefrontal-cortex	Q5FVM4	Nono	1.62881e-05	4.2083e-05	4.06267e-05	1.71884e-05	2.46552e-05	3.2441e-05	4.80085e-05	9.91041e-06	1.1285e-05	3.44699e-05	2.19789e-05	3.27466e-05	0.000331682	12	Non-POU domain-containing octamer-binding protein OS=Rattus norvegicus OX=10116 GN=Nono PE=1 SV=3
Prefrontal-cortex	P70645	Blmh	2.56465e-05	1.42118e-05	6.49743e-05	1.04109e-05	2.00453e-05	9.22731e-05	1.81049e-05	3.7407e-05	2.23737e-05	5.16876e-05	1.74914e-05	3.2253e-05	0.00040688	12	Bleomycin hydrolase OS=Rattus norvegicus OX=10116 GN=Blmh PE=1 SV=1
Prefrontal-cortex	Q5U318	Pea15	0.000268201	0.000192904	0.000194733	0.000152483	0.000165973	0.000180542	0.000160636	0.000248199	0.000257086	0.000275169	0.000289284	0.000294684	0.00267989	12	Astrocytic phosphoprotein PEA-15 OS=Rattus norvegicus OX=10116 GN=Pea15 PE=1 SV=1
Prefrontal-cortex	P68255	Ywhaq	0.000510551	0.000403649	0.000313653	0.000242434	0.000397348	0.000490299	0.000367021	0.000488385	0.000498026	0.000449236	0.000443779	0.000541085	0.00514547	12	14-3-3 protein theta OS=Rattus norvegicus OX=10116 GN=Ywhaq PE=1 SV=1
Prefrontal-cortex	P09216	Prkce	5.23358e-05	6.3781e-05	4.30225e-05	2.15291e-05	3.87936e-05	2.96849e-05	4.25245e-05	3.41241e-05	2.35536e-05	4.78042e-05	3.85944e-05	5.08528e-05	0.000486601	12	Protein kinase C epsilon type OS=Rattus norvegicus OX=10116 GN=Prkce PE=1 SV=1
Prefrontal-cortex	F1LMZ8	Psmd11	3.48367e-05	3.24968e-05	2.80602e-05	2.59333e-05	3.25019e-05	2.22369e-05	2.15621e-05	3.82297e-05	2.38164e-05	3.90217e-05	5.5572e-05	3.74636e-05	0.000391731	12	26S proteasome non-ATPase regulatory subunit 11 OS=Rattus norvegicus OX=10116 GN=Psmd11 PE=1 SV=2
Prefrontal-cortex	Q91ZN1	Coro1a	0.000171139	0.000207923	0.000246116	0.00014689	0.000150017	0.000210372	0.000204837	0.000151027	0.000145398	0.000162559	0.000215601	0.00013757	0.00214945	12	Coronin-1A OS=Rattus norvegicus OX=10116 GN=Coro1a PE=1 SV=3
Prefrontal-cortex	Q5HZV9	Ppp1r7	0.000155309	0.000125355	0.000296045	0.000130248	0.00020331	0.000159429	0.000143774	0.000221443	0.000180155	0.000223668	0.000125054	0.000134247	0.00209804	12	Protein phosphatase 1 regulatory subunit 7 OS=Rattus norvegicus OX=10116 GN=Ppp1r7 PE=1 SV=1
Prefrontal-cortex	O08838	Amph	0.000444836	0.00032778	0.00038783	0.000254303	0.000471176	0.000374768	0.000382484	0.000484447	0.000355476	0.000424482	0.000569975	0.000475597	0.00495315	12	Amphiphysin OS=Rattus norvegicus OX=10116 GN=Amph PE=1 SV=1
Prefrontal-cortex	Q9QZM5	Abi1	4.26765e-05	2.52189e-05	8.30563e-05	4.13867e-05	4.16573e-05	3.77283e-05	5.08213e-05	7.10768e-05	1.44728e-05	4.15089e-05	5.4828e-05	2.50474e-05	0.000529479	12	Abl interactor 1 OS=Rattus norvegicus OX=10116 GN=Abi1 PE=1 SV=3
Prefrontal-cortex	O35244	Prdx6	0.000503328	0.000212151	0.000319447	0.000252138	0.000300559	0.000524673	0.000303454	0.000425787	0.000588736	0.000433402	0.000389148	0.000444561	0.00469738	12	Peroxiredoxin-6 OS=Rattus norvegicus OX=10116 GN=Prdx6 PE=1 SV=3
Prefrontal-cortex	P31977	Ezr	1.38275e-05	1.24956e-05	1.27249e-05	1.93763e-06	9.65408e-06	9.73738e-06	1.32763e-05	1.65962e-05	1.19406e-05	1.48438e-05	2.40789e-05	1.36784e-05	0.000154791	12	Ezrin OS=Rattus norvegicus OX=10116 GN=Ezr PE=1 SV=3
Prefrontal-cortex	Q4V7C6	Gmps	2.14696e-06	1.87527e-06	7.6266e-07	6.23977e-06	1.71326e-05	1.66492e-05	3.97262e-06	1.32351e-05	6.16672e-06	7.81568e-06	9.59145e-06	1.16772e-05	9.72653e-05	12	GMP synthase [glutamine-hydrolyzing] OS=Rattus norvegicus OX=10116 GN=Gmps PE=1 SV=1
Prefrontal-cortex	O35142	Copb2	4.79481e-06	5.32532e-06	1.5927e-06	3.50798e-06	4.55807e-06	1.35927e-06	1.03636e-05	9.88773e-06	6.05973e-06	3.84595e-06	6.78938e-06	1.18523e-05	6.99369e-05	12	Coatomer subunit beta' OS=Rattus norvegicus OX=10116 GN=Copb2 PE=1 SV=3
Prefrontal-cortex	Q08602	Rabggta	0.000107486	1.19859e-05	7.57285e-05	1.26923e-05	1.17134e-05	1.88201e-05	7.13621e-06	1.42448e-05	2.25377e-05	2.93124e-05	7.78239e-06	2.86645e-05	0.000348104	12	Geranylgeranyl transferase type-2 subunit alpha OS=Rattus norvegicus OX=10116 GN=Rabggta PE=1 SV=1
Prefrontal-cortex	B0BN85	Sugt1	2.71388e-06		3.803e-06	3.98989e-06	5.69964e-06	7.41585e-06	2.43637e-06	6.91819e-06	3.8703e-06	3.53633e-06	6.17182e-06	4.19349e-06	5.07488e-05	11	Protein SGT1 homolog OS=Rattus norvegicus OX=10116 GN=Sugt1 PE=2 SV=1
Prefrontal-cortex	P61107	Rab14	9.89403e-05	0.000159707	0.000179776	0.000105968	0.000163042	0.000119756	0.000166901	0.000129337	0.000134105	0.000168845	0.000173584	0.000136932	0.00173689	12	Ras-related protein Rab-14 OS=Rattus norvegicus OX=10116 GN=Rab14 PE=1 SV=3
Prefrontal-cortex	P35281	Rab10	1.66154e-05	4.05594e-05	2.03298e-05	1.15663e-05	6.94807e-06	7.24534e-06	1.83332e-05	1.47335e-05	7.21394e-06	1.51447e-05	1.7889e-05	1.97336e-05	0.000196312	12	Ras-related protein Rab-10 OS=Rattus norvegicus OX=10116 GN=Rab10 PE=1 SV=1
Prefrontal-cortex	Q62826	Hnrnpm	9.17963e-06	1.78113e-05	1.12592e-05	5.34504e-06	4.25301e-06	4.84962e-06	1.01923e-05		5.24615e-06	1.15275e-05	9.80763e-06	1.12488e-05	0.00010072	11	Heterogeneous nuclear ribonucleoprotein M OS=Rattus norvegicus OX=10116 GN=Hnrnpm PE=1 SV=4
Prefrontal-cortex	Q9WVC0	Septin7	0.000149934	0.000316155	0.000433288	0.000142748	0.000337163	0.000264683	0.000454175	0.000325596	0.000268969	0.000358006	0.000438766	0.000245864	0.00373535	12	Septin-7 OS=Rattus norvegicus OX=10116 GN=Septin7 PE=1 SV=1
Prefrontal-cortex	Q62868	Rock2	3.3784e-05	3.51939e-05	6.57755e-05	3.65995e-05	4.01138e-05	2.5029e-05	2.09873e-05	3.2957e-05	3.73577e-05	1.66089e-05	1.72292e-05	2.89749e-05	0.000390611	12	Rho-associated protein kinase 2 OS=Rattus norvegicus OX=10116 GN=Rock2 PE=1 SV=2
Prefrontal-cortex	P19511	Atp5pb	5.42574e-05	0.000107534	4.96559e-05	4.55581e-05	3.36572e-05	2.29849e-05	2.52894e-05	6.7729e-06	3.14353e-06	7.41903e-05	3.23858e-05		0.000455429	11	ATP synthase F(0) complex subunit B1, mitochondrial OS=Rattus norvegicus OX=10116 GN=Atp5pb PE=1 SV=1
Prefrontal-cortex	P21670	Psma4	9.24846e-05	0.000114633	4.01449e-05	3.80921e-05	8.56912e-05	9.09136e-05	3.62278e-05	4.27222e-05	4.35063e-05	2.91229e-05	9.58917e-05	0.000109036	0.000818466	12	Proteasome subunit alpha type-4 OS=Rattus norvegicus OX=10116 GN=Psma4 PE=1 SV=1
Prefrontal-cortex	P04041	Gpx1	1.52613e-05	1.56403e-05		4.84726e-06	9.66061e-06	1.84928e-05	7.80754e-06	1.46112e-05	2.72811e-05	1.54201e-05	2.35581e-05	3.231e-05	0.00018489	11	Glutathione peroxidase 1 OS=Rattus norvegicus OX=10116 GN=Gpx1 PE=1 SV=4
Prefrontal-cortex	P63170	Dynll1				1.11003e-05	1.23014e-05	1.44377e-05	1.23628e-05	1.2339e-05		1.77428e-05	1.37589e-05		9.40429e-05	7	Dynein light chain 1, cytoplasmic OS=Rattus norvegicus OX=10116 GN=Dynll1 PE=1 SV=1
Prefrontal-cortex	P27952	Rps2	8.05566e-05	9.76843e-05	0.000120364	5.65659e-05	5.78419e-05	8.729e-05	8.29247e-05	6.03729e-05	7.38005e-05	0.000124131	0.000124095	0.000117691	0.00108332	12	40S ribosomal protein S2 OS=Rattus norvegicus OX=10116 GN=Rps2 PE=1 SV=1
Prefrontal-cortex	B0BN93	Psmd13	3.76278e-05	1.97165e-05	1.50178e-05	2.34767e-05	2.91976e-05	4.94448e-05	1.9077e-05	4.78371e-05	3.17599e-05	3.00093e-05	4.5017e-05	3.26256e-05	0.000380807	12	26S proteasome non-ATPase regulatory subunit 13 OS=Rattus norvegicus OX=10116 GN=Psmd13 PE=1 SV=1
Prefrontal-cortex	Q9QVC8	Fkbp4	4.6256e-06		4.82179e-06	6.06736e-06	2.46908e-05	1.20569e-05	8.43651e-06	2.12184e-05	1.98129e-05	4.41795e-06	3.21435e-06	9.94255e-06	0.000119305	11	Peptidyl-prolyl cis-trans isomerase FKBP4 OS=Rattus norvegicus OX=10116 GN=Fkbp4 PE=1 SV=3
Prefrontal-cortex	Q68FX1	Mpi	5.53306e-06		4.54169e-06	6.62168e-06	4.07002e-06	7.36873e-06	3.17964e-06	7.98116e-06	2.29499e-06	3.7074e-06	1.19824e-05	4.41541e-06	6.16962e-05	11	Mannose-6-phosphate isomerase OS=Rattus norvegicus OX=10116 GN=Mpi PE=2 SV=1
Prefrontal-cortex	P63047	Sult4a1	4.81642e-05	3.83831e-05	2.58374e-05	1.98305e-05	1.81196e-05	2.18342e-05	1.51767e-05	1.62867e-05	6.10797e-06	1.39323e-05	1.70988e-05	6.17781e-06	0.000246949	12	Sulfotransferase 4A1 OS=Rattus norvegicus OX=10116 GN=Sult4a1 PE=1 SV=1
Prefrontal-cortex	P21571	Atp5pf	1.58437e-05	3.81945e-05	1.8252e-05	1.78484e-05	1.64035e-05	9.45685e-06	1.22059e-05	1.98356e-06	1.46052e-06	2.6577e-05	4.46685e-06		0.000162693	11	ATP synthase-coupling factor 6, mitochondrial OS=Rattus norvegicus OX=10116 GN=Atp5pf PE=1 SV=1
Prefrontal-cortex	Q07009	Capn2	3.47145e-05	2.45969e-05	4.00714e-05	2.7187e-05	3.75589e-05	3.74269e-05	3.99451e-05	4.72704e-05	5.9401e-05	5.17371e-05	7.615e-05	5.4171e-05	0.00053023	12	Calpain-2 catalytic subunit OS=Rattus norvegicus OX=10116 GN=Capn2 PE=1 SV=3
Prefrontal-cortex	O88588	Pacs1	3.55779e-06	1.90985e-05	6.72377e-06	4.84669e-06	1.12144e-05	7.06093e-07	2.09417e-05	2.36457e-05	8.56474e-06	1.70015e-05	1.29868e-05	1.63802e-05	0.000145668	12	Phosphofurin acidic cluster sorting protein 1 OS=Rattus norvegicus OX=10116 GN=Pacs1 PE=1 SV=1
Prefrontal-cortex	P60123	Ruvbl1	9.21953e-07			2.0262e-06	5.65491e-06		6.19544e-06	8.22891e-06	5.21942e-06	6.92272e-06	8.21241e-06	6.85917e-06	5.02411e-05	9	RuvB-like 1 OS=Rattus norvegicus OX=10116 GN=Ruvbl1 PE=1 SV=1
Prefrontal-cortex	Q9EQX9	Ube2n	0.000302394	0.000212614	0.000189244	0.00020005	0.000177375	0.000242645	0.000290714	0.000320454	0.000219178	0.00018355	0.0001719	0.000261738	0.00277186	12	Ubiquitin-conjugating enzyme E2 N OS=Rattus norvegicus OX=10116 GN=Ube2n PE=1 SV=1
Prefrontal-cortex	Q05764	Add2	6.57793e-07	3.50449e-06	7.00329e-07	1.33319e-06	4.12926e-06	5.36203e-06	8.16666e-06	7.87502e-06	3.11122e-06	8.07187e-06	7.70247e-06	4.72913e-06	5.53435e-05	12	Beta-adducin OS=Rattus norvegicus OX=10116 GN=Add2 PE=1 SV=4
Prefrontal-cortex	P62804	H4c2	5.79642e-05	0.00180064	0.000378068	7.22671e-05	0.000303506	0.00022186	0.000501608	6.7548e-05	8.6314e-05	0.000615707	0.00013365	0.000131449	0.00437058	12	Histone H4 OS=Rattus norvegicus OX=10116 GN=H4c2 PE=1 SV=2
Prefrontal-cortex	Q4AEF8	Copg1	8.4268e-07				5.64196e-07	3.87875e-07	8.90855e-07	2.47975e-06	3.936e-06	8.92128e-07	1.47126e-06	3.15388e-06	1.46186e-05	9	Coatomer subunit gamma-1 OS=Rattus norvegicus OX=10116 GN=Copg1 PE=2 SV=1
Prefrontal-cortex	Q5I0D5	Lhpp	8.27191e-06	2.66304e-06	5.77246e-06	5.15545e-06	1.18447e-05	1.02353e-05	9.23769e-06	1.32547e-05	7.4385e-06	9.43696e-06	8.27759e-06	7.58172e-06	9.917e-05	12	Phospholysine phosphohistidine inorganic pyrophosphate phosphatase OS=Rattus norvegicus OX=10116 GN=Lhpp PE=2 SV=1
Prefrontal-cortex	P56574	Idh2	0.00016702	0.000103371	0.000178932	7.97273e-05	0.000152148	8.92833e-05	0.000183055	0.000187736	0.00015887	0.00018309	0.000264915	0.000199475	0.00194762	12	Isocitrate dehydrogenase [NADP], mitochondrial OS=Rattus norvegicus OX=10116 GN=Idh2 PE=1 SV=2
Prefrontal-cortex	P20760	Igg-2a	2.60152e-05	4.4408e-05	0.000151756	2.12334e-05	1.02146e-05	0.000103361	6.43101e-05	1.56161e-05	1.75375e-05	8.30616e-05	2.21687e-05	9.1338e-05	0.000651021	12	Ig gamma-2A chain C region OS=Rattus norvegicus OX=10116 GN=Igg-2a PE=1 SV=1
Prefrontal-cortex	Q64591	Decr1	4.56612e-05	1.68242e-05	7.73718e-06	8.2522e-06		5.07909e-06	6.501e-06	9.19886e-06	5.57743e-06	1.3761e-05	1.47691e-05	1.00721e-05	0.000143433	11	2,4-dienoyl-CoA reductase [(3E)-enoyl-CoA-producing], mitochondrial OS=Rattus norvegicus OX=10116 GN=Decr1 PE=1 SV=2
Prefrontal-cortex	O35814	Stip1	0.00029172	0.000182021	0.000230179	0.000146436	0.000246855	0.00025852	0.000252931	0.000373652	0.000297228	0.000310813	0.000295377	0.00035269	0.00323842	12	Stress-induced-phosphoprotein 1 OS=Rattus norvegicus OX=10116 GN=Stip1 PE=1 SV=1
Prefrontal-cortex	P40307	Psmb2	7.30231e-05	5.49065e-05	3.86251e-05	6.06426e-05	5.98249e-05	5.30304e-05	4.53278e-05	6.55683e-05	3.52185e-05	5.43199e-05	6.64545e-05	6.16236e-05	0.000668565	12	Proteasome subunit beta type-2 OS=Rattus norvegicus OX=10116 GN=Psmb2 PE=1 SV=1
Prefrontal-cortex	M0RC99	Rab5a	8.64726e-05	0.000138999	9.89318e-05	0.000308556	7.31733e-05	7.85579e-05	0.000108266	0.00010231	6.67519e-05	9.81404e-05	0.000105208	0.000106194	0.00137156	12	Ras-related protein Rab-5A OS=Rattus norvegicus OX=10116 GN=Rab5a PE=2 SV=1
Prefrontal-cortex	B0BNA7	Eif3i	2.28505e-06		5.19126e-06	1.4986e-06	6.19683e-06	5.67172e-06	1.9489e-05	3.34542e-06	1.70693e-05	1.66885e-05	2.02759e-05	1.5501e-05	0.000113213	11	Eukaryotic translation initiation factor 3 subunit I OS=Rattus norvegicus OX=10116 GN=Eif3i PE=2 SV=1
Prefrontal-cortex	Q5XIM7	Kars1	1.40094e-05	1.05245e-05	4.52704e-06	5.2568e-06	5.76371e-06	8.95702e-06	4.72286e-06	1.26872e-05	9.88969e-06	3.41284e-05	3.91857e-05	2.36779e-05	0.00017333	12	Lysine--tRNA ligase OS=Rattus norvegicus OX=10116 GN=Kars1 PE=1 SV=1
Prefrontal-cortex	P41542	Uso1	2.61957e-05	1.05167e-05	1.96359e-05	2.88041e-05	2.97648e-05	3.54483e-05	2.44011e-05	3.18104e-05	3.15096e-05	3.3121e-05	4.94613e-05	4.27579e-05	0.000363427	12	General vesicular transport factor p115 OS=Rattus norvegicus OX=10116 GN=Uso1 PE=1 SV=1
Prefrontal-cortex	Q80W98	Sgtb	1.81009e-05	5.98733e-06	1.85152e-05	1.51244e-05	4.98681e-05	4.57373e-05	3.23219e-06	9.19853e-06	1.01713e-05	3.50401e-05	7.38715e-06	1.78861e-05	0.000236249	12	Small glutamine-rich tetratricopeptide repeat-containing protein beta OS=Rattus norvegicus OX=10116 GN=Sgtb PE=1 SV=1
Prefrontal-cortex	Q63396	Sub1	1.9566e-05	1.54834e-05	5.75848e-05	4.94473e-05	5.75278e-05	6.80136e-05	4.69085e-05	6.87907e-05	3.85207e-05	5.5161e-05	6.25729e-05	3.4054e-05	0.000573631	12	Activated RNA polymerase II transcriptional coactivator p15 OS=Rattus norvegicus OX=10116 GN=Sub1 PE=1 SV=3
Prefrontal-cortex	Q63598	Pls3	8.28531e-06	3.35672e-06	3.91041e-06	4.72238e-06	1.93221e-06	1.54388e-05	1.26532e-05	1.02171e-05	2.20144e-05	2.56596e-05	1.45764e-05	3.71922e-05	0.000159959	12	Plastin-3 OS=Rattus norvegicus OX=10116 GN=Pls3 PE=1 SV=2
Prefrontal-cortex	Q63270	Aco1	2.09711e-05	7.353e-06	1.73263e-05	1.33357e-05	1.19875e-05	1.24503e-05	8.62524e-06	1.8527e-05	9.5591e-06	1.40936e-05	1.5817e-05	1.78315e-05	0.000167877	12	Cytoplasmic aconitate hydratase OS=Rattus norvegicus OX=10116 GN=Aco1 PE=1 SV=1
Prefrontal-cortex	Q9EQV6	Tpp1	6.85216e-07			2.64815e-06	1.84329e-06	2.48715e-06	2.04578e-06	5.95625e-06	5.49027e-06	3.21187e-06	6.64424e-06	8.40581e-06	3.9418e-05	10	Tripeptidyl-peptidase 1 OS=Rattus norvegicus OX=10116 GN=Tpp1 PE=1 SV=1
Prefrontal-cortex	P24049	Rpl17	2.04503e-05	2.16752e-05	2.18346e-05	1.64942e-06	2.45477e-05	4.42973e-06	8.42967e-05	5.45392e-05	1.00404e-05	5.19183e-05	8.00309e-05	3.86629e-05	0.000414075	12	60S ribosomal protein L17 OS=Rattus norvegicus OX=10116 GN=Rpl17 PE=2 SV=3
Prefrontal-cortex	Q5XHY5	Tars1	8.82605e-06	5.90335e-06	6.98938e-06	8.48082e-06	1.52409e-05	1.41075e-05	4.91156e-06	1.02357e-05	1.78844e-05	8.3272e-06	1.84126e-05	1.74711e-05	0.000136791	12	Threonine--tRNA ligase 1, cytoplasmic OS=Rattus norvegicus OX=10116 GN=Tars1 PE=1 SV=1
Prefrontal-cortex	Q9QXU8	Dync1li1	6.90969e-05	5.45249e-05	6.20036e-05	2.62276e-05	3.31233e-05	4.67513e-05	8.04583e-05	7.96505e-05	5.49045e-05	6.62021e-05	7.41896e-05	6.62349e-05	0.000713368	12	Cytoplasmic dynein 1 light intermediate chain 1 OS=Rattus norvegicus OX=10116 GN=Dync1li1 PE=1 SV=1
Prefrontal-cortex	Q64640	Adk	2.81535e-05	4.40582e-05	1.70051e-05	2.41063e-05	2.88432e-05	4.99934e-05	2.00127e-05	2.54314e-05	5.10243e-06	1.86721e-05	2.68599e-05	2.70835e-05	0.000315322	12	Adenosine kinase OS=Rattus norvegicus OX=10116 GN=Adk PE=1 SV=3
Prefrontal-cortex	P04897	Gnai2		8.6539e-05	3.57757e-05	5.27999e-06	6.13383e-06	5.35363e-06	4.84852e-05	4.50467e-06	1.18343e-05	1.88544e-05	1.19179e-05	8.56513e-06	0.000243244	11	Guanine nucleotide-binding protein G(i) subunit alpha-2 OS=Rattus norvegicus OX=10116 GN=Gnai2 PE=1 SV=3
Prefrontal-cortex	Q9JMB5	Adrm1	4.05311e-06	4.49499e-06	2.91023e-06	2.73954e-06	3.09216e-06	3.11209e-06	1.1851e-06	4.28919e-06	7.68518e-07	3.93996e-06	3.58679e-06	5.85078e-06	4.00225e-05	12	Proteasomal ubiquitin receptor ADRM1 OS=Rattus norvegicus OX=10116 GN=Adrm1 PE=1 SV=2
Prefrontal-cortex	P41123	Rpl13	0.000106605	0.000114508	8.52645e-05	3.57445e-05	4.9757e-05	8.25893e-05	0.000108021	6.10396e-05	7.0801e-05	7.48147e-05	0.000122935	9.16927e-05	0.00100377	12	60S ribosomal protein L13 OS=Rattus norvegicus OX=10116 GN=Rpl13 PE=1 SV=2
Prefrontal-cortex	Q71UF4	Rbbp7		4.52508e-06	1.89106e-06	7.26598e-06	5.83534e-06	3.8574e-06	4.83459e-06	9.20408e-06	2.02719e-06	4.35262e-07	6.31942e-06	5.22428e-06	5.14197e-05	11	Histone-binding protein RBBP7 OS=Rattus norvegicus OX=10116 GN=Rbbp7 PE=2 SV=1
Prefrontal-cortex	P54921	Napa	6.0206e-05	0.00011966	0.000117201	8.97803e-05	7.09068e-05	8.78576e-05	0.000110209	0.000233055	4.50658e-05	0.000104906	7.04873e-05	7.3861e-05	0.0011832	12	Alpha-soluble NSF attachment protein OS=Rattus norvegicus OX=10116 GN=Napa PE=1 SV=2
Prefrontal-cortex	P16446	Pitpna	8.4575e-05	5.85695e-05	0.000112081	8.54298e-05	8.31026e-05	0.000113838	4.50739e-05	5.6217e-05	7.21449e-05	5.48783e-05	0.000106145	6.02794e-05	0.000932334	12	Phosphatidylinositol transfer protein alpha isoform OS=Rattus norvegicus OX=10116 GN=Pitpna PE=1 SV=2
Prefrontal-cortex	P24090	Ahsg	4.82923e-06	1.04663e-05	9.99857e-06	1.10607e-05	5.43644e-06	2.43552e-05	3.59574e-06	9.29716e-06	2.55571e-06	5.40502e-06	1.04611e-05	4.14783e-06	0.000101609	12	Alpha-2-HS-glycoprotein OS=Rattus norvegicus OX=10116 GN=Ahsg PE=1 SV=2
Prefrontal-cortex	P0C1X8	Aak1	8.63314e-05	0.000138446	0.000121163	5.91185e-05	0.000148579	8.83233e-05	0.000214686	0.000165246	0.000171345	0.000136454	0.000181482	0.000167297	0.00167847	12	AP2-associated protein kinase 1 OS=Rattus norvegicus OX=10116 GN=Aak1 PE=1 SV=1
Prefrontal-cortex	Q5FVI4	Cend1	6.62425e-06	3.23022e-06	9.43655e-06	4.93901e-06	8.11854e-06	7.69735e-06	4.0854e-06	1.59623e-06	5.29732e-06	7.30461e-06	6.95529e-06	3.99918e-06	6.92839e-05	12	Cell cycle exit and neuronal differentiation protein 1 OS=Rattus norvegicus OX=10116 GN=Cend1 PE=1 SV=1
Prefrontal-cortex	O70593	Sgta	2.73618e-05	1.78041e-05	2.77823e-05	2.34549e-05	4.43611e-05	4.32799e-05	3.16405e-05	4.44977e-05	3.84659e-05	4.71388e-05	2.81169e-05	4.72305e-05	0.000421134	12	Small glutamine-rich tetratricopeptide repeat-containing protein alpha OS=Rattus norvegicus OX=10116 GN=Sgta PE=1 SV=1
Prefrontal-cortex	O70196	Prep	8.46492e-06	2.79039e-06	2.84384e-06	2.19371e-05	7.76543e-06	7.00114e-06	3.86927e-06	9.18508e-06	6.7497e-06	1.21724e-05	7.08417e-06	1.33648e-05	0.000103228	12	Prolyl endopeptidase OS=Rattus norvegicus OX=10116 GN=Prep PE=1 SV=1
Prefrontal-cortex	P34067	Psmb4	3.97079e-06	8.20331e-06	1.81103e-05	1.35167e-05	1.87021e-05	3.01832e-05	8.34217e-06	1.2436e-05	1.62499e-05	1.63494e-05	2.84115e-05	2.64896e-05	0.000200965	12	Proteasome subunit beta type-4 OS=Rattus norvegicus OX=10116 GN=Psmb4 PE=1 SV=2
Prefrontal-cortex	P62744	Ap2s1	0.000159098	0.000321671	0.00021486	6.92337e-05	9.30903e-05	7.86004e-05	0.000184566	0.000121729	9.39889e-05	0.000147709	0.000184295	0.000150809	0.00181965	12	AP-2 complex subunit sigma OS=Rattus norvegicus OX=10116 GN=Ap2s1 PE=1 SV=1
Prefrontal-cortex	P49803	Rgs7	5.37985e-05	0.000112253	5.99026e-05	4.64202e-05	4.08496e-05	2.47888e-05	3.9198e-05	5.93762e-05	7.26716e-05	4.00309e-05	6.13721e-05	6.21013e-05	0.000672763	12	Regulator of G-protein signaling 7 OS=Rattus norvegicus OX=10116 GN=Rgs7 PE=1 SV=2
Prefrontal-cortex	O89049	Txnrd1	3.03196e-05	1.31707e-05	1.91765e-05	7.12739e-06	1.35861e-05	1.81894e-05	2.07771e-05	2.91291e-05	2.42601e-05	4.08048e-05	4.5028e-05	3.90924e-05	0.000300661	12	Thioredoxin reductase 1, cytoplasmic OS=Rattus norvegicus OX=10116 GN=Txnrd1 PE=1 SV=5
Prefrontal-cortex	D3ZDK7	Pgp		5.31069e-06	4.11234e-06		6.76833e-06		3.78887e-05	2.23835e-05	6.21175e-06	5.77064e-06	4.35055e-06	6.88491e-06	9.96814e-05	9	Glycerol-3-phosphate phosphatase OS=Rattus norvegicus OX=10116 GN=Pgp PE=1 SV=1
Prefrontal-cortex	B2GUZ5	Capza1	2.3084e-06	6.21139e-06	1.03506e-05	7.38549e-06	1.37808e-05	1.14091e-05	1.57967e-05	0.000111307	9.16768e-06	1.26755e-05	6.12834e-05	7.14605e-06	0.000268822	12	F-actin-capping protein subunit alpha-1 OS=Rattus norvegicus OX=10116 GN=Capza1 PE=1 SV=1
Prefrontal-cortex	P12001	Rpl18	9.59377e-05	0.000157554	4.50406e-05	2.00106e-05	3.24915e-05	4.64039e-05	4.99745e-05	4.12788e-05	4.80549e-05	5.98868e-05	7.36073e-05	6.57984e-05	0.000736039	12	60S ribosomal protein L18 OS=Rattus norvegicus OX=10116 GN=Rpl18 PE=1 SV=2
Prefrontal-cortex	Q5EB77	Rab18	1.0886e-05	4.60812e-05	9.6236e-06	1.22201e-05	1.20311e-05	1.03232e-05	2.95928e-05	2.0163e-05	1.2692e-05	2.06941e-05	3.91056e-05	1.76603e-05	0.000241073	12	Ras-related protein Rab-18 OS=Rattus norvegicus OX=10116 GN=Rab18 PE=2 SV=1
Prefrontal-cortex	P14669	Anxa3	3.5467e-06	5.01687e-05	2.74093e-05	1.01101e-05	5.90541e-07	4.13283e-07	3.76306e-05	7.83366e-06	1.61532e-06	1.11964e-05	4.88556e-06	4.40611e-06	0.000159806	12	Annexin A3 OS=Rattus norvegicus OX=10116 GN=Anxa3 PE=1 SV=4
Prefrontal-cortex	P55051	Fabp7	7.19449e-05	4.76647e-05	7.53582e-05	3.72059e-05	3.61922e-05	7.68023e-05	8.59312e-05	0.000169445	0.000108366	0.000171741	0.000145354	0.000162528	0.00118853	12	Fatty acid-binding protein, brain OS=Rattus norvegicus OX=10116 GN=Fabp7 PE=1 SV=2
Prefrontal-cortex	P81377	Prkar1b	4.80616e-06	2.35695e-06	7.77157e-07	1.25754e-06	2.6027e-06		4.4629e-06			6.42701e-06	6.49313e-06	8.80581e-06	3.79894e-05	9	cAMP-dependent protein kinase type I-beta regulatory subunit OS=Rattus norvegicus OX=10116 GN=Prkar1b PE=2 SV=2
Prefrontal-cortex	P60203	Plp1	0.000116403	0.000480538	0.000449436	0.00013386	0.000363369	0.000396185	0.00139821	0.000134369	0.000302241	0.000584081	0.000391661	0.000269297	0.00501965	12	Myelin proteolipid protein OS=Rattus norvegicus OX=10116 GN=Plp1 PE=1 SV=2
Prefrontal-cortex	Q62703	Rcn2	1.13306e-05	7.9736e-06	1.82195e-05	1.78841e-05	1.15946e-05	2.87983e-05	7.05848e-06	8.42042e-06	7.83989e-06	1.48936e-05	1.02312e-05	6.99135e-06	0.000151236	12	Reticulocalbin-2 OS=Rattus norvegicus OX=10116 GN=Rcn2 PE=1 SV=2
Prefrontal-cortex	Q7TMB7	Plppr4		1.06643e-05		1.6948e-06		3.73262e-06	2.20948e-06	2.59351e-06	1.56826e-06	9.08439e-07	2.16702e-06	9.63554e-06	3.51739e-05	9	Phospholipid phosphatase-related protein type 4 OS=Rattus norvegicus OX=10116 GN=Plppr4 PE=1 SV=1
Prefrontal-cortex	B0BNM1	Naxe	1.61546e-05	1.16008e-05	9.9546e-06	5.01247e-06	9.35202e-06	1.23707e-05	1.04708e-05	1.78964e-05	1.34221e-05	1.73872e-05	1.56876e-05	1.38532e-05	0.000153163	12	NAD(P)H-hydrate epimerase OS=Rattus norvegicus OX=10116 GN=Naxe PE=2 SV=1
Prefrontal-cortex	Q99PF5	Khsrp	2.14937e-05	1.96182e-05	1.94485e-05	1.67208e-05	2.95962e-05	3.55996e-05	6.99655e-05	3.40046e-05	3.78215e-05	5.64112e-05	5.91886e-05	6.16699e-05	0.000461538	12	Far upstream element-binding protein 2 OS=Rattus norvegicus OX=10116 GN=Khsrp PE=1 SV=1
Prefrontal-cortex	P40329	Rars1	2.46351e-05	1.13663e-05	5.63899e-06	5.63506e-06	1.63131e-05	2.70465e-05	2.21994e-05	3.12074e-05	1.14313e-05	2.95774e-05	4.61768e-05	3.04763e-05	0.000261704	12	Arginine--tRNA ligase, cytoplasmic OS=Rattus norvegicus OX=10116 GN=Rars1 PE=1 SV=2
Prefrontal-cortex	O35094	Timm44	3.88611e-06	4.42924e-06	3.07018e-06	1.01917e-06			1.68013e-06	7.58716e-07		3.97566e-06	9.78273e-06	2.62351e-06	3.12255e-05	9	Mitochondrial import inner membrane translocase subunit TIM44 OS=Rattus norvegicus OX=10116 GN=Timm44 PE=1 SV=1
Prefrontal-cortex	Q6AY41	Tmem30a	1.93055e-06	2.53664e-05	1.36395e-05	3.55342e-06	7.82675e-06	6.41803e-06	1.70486e-05	1.03932e-05	3.00183e-06	1.1375e-05	1.1964e-05	1.4008e-06	0.000113918	12	Cell cycle control protein 50A OS=Rattus norvegicus OX=10116 GN=Tmem30a PE=1 SV=1
Prefrontal-cortex	P09495	Tpm4	2.25473e-05		4.5955e-06	3.04252e-06	4.56713e-06	1.1674e-05	5.62824e-06	9.58605e-06	3.13088e-05	2.03492e-05	2.55527e-05	8.32323e-06	0.000147175	11	Tropomyosin alpha-4 chain OS=Rattus norvegicus OX=10116 GN=Tpm4 PE=1 SV=3
Prefrontal-cortex	D3ZFD0	Myo18a		3.21738e-05	5.01967e-06	1.59383e-06	1.3222e-05	8.40292e-06	1.68485e-05	5.35186e-06	7.83829e-06	6.6558e-06	9.3633e-06	3.85714e-06	0.000110327	11	Unconventional myosin-XVIIIa OS=Rattus norvegicus OX=10116 GN=Myo18a PE=1 SV=2
Prefrontal-cortex	P18266	Gsk3b	7.74809e-06	9.6023e-06	1.15293e-05	6.49059e-06	1.46568e-05	1.09905e-05	1.26019e-05	9.4302e-06	7.30905e-06	8.95187e-06	2.40148e-05	1.12666e-05	0.000134592	12	Glycogen synthase kinase-3 beta OS=Rattus norvegicus OX=10116 GN=Gsk3b PE=1 SV=1
Prefrontal-cortex	Q66HR2	Mapre1	2.50579e-05	2.66147e-05	1.48988e-05	1.51756e-05	2.10592e-05	1.95454e-05	2.35821e-05	2.98589e-05	3.22712e-05	2.77363e-05	3.02187e-05	3.85179e-05	0.000304537	12	Microtubule-associated protein RP/EB family member 1 OS=Rattus norvegicus OX=10116 GN=Mapre1 PE=1 SV=3
Prefrontal-cortex	Q99N27	Snx1	1.72504e-05	1.19337e-05	8.18521e-06	1.01967e-05	1.43137e-05	1.53725e-05	1.42068e-05	4.33335e-05	1.65415e-05	1.85265e-05	3.2392e-05	2.89924e-05	0.000231245	12	Sorting nexin-1 OS=Rattus norvegicus OX=10116 GN=Snx1 PE=1 SV=1
Prefrontal-cortex	Q6MG06	Gnl1				1.51959e-06	4.55125e-06	8.37356e-06	2.06874e-06	6.72945e-06		1.13842e-06	1.35653e-06		2.57375e-05	7	Guanine nucleotide-binding protein-like 1 OS=Rattus norvegicus OX=10116 GN=Gnl1 PE=1 SV=1
Prefrontal-cortex	P50904	Rasa1	1.86077e-06	1.03683e-05	7.01088e-07	4.93546e-07	8.04784e-07	3.79083e-07	3.24651e-06	5.25243e-06	2.32096e-06	2.28624e-05	2.35791e-06	4.33528e-05	9.40006e-05	12	Ras GTPase-activating protein 1 OS=Rattus norvegicus OX=10116 GN=Rasa1 PE=1 SV=1
Prefrontal-cortex	Q6AY30	Sccpdh	1.01479e-05	2.98271e-05	1.20912e-05	1.34868e-05	2.96817e-06	3.33872e-06	7.27635e-06	4.48032e-06	4.17643e-06	7.20184e-06	9.45904e-06		0.000104454	11	Saccharopine dehydrogenase-like oxidoreductase OS=Rattus norvegicus OX=10116 GN=Sccpdh PE=1 SV=1
Prefrontal-cortex	Q6AYR2	Ndrg3	3.10307e-05	9.49722e-06	3.20013e-05	1.55912e-05	1.73783e-05	2.07196e-05	2.6867e-05	1.55343e-05	8.63444e-06	2.53822e-05	2.4596e-05	6.72047e-06	0.000233953	12	Protein NDRG3 OS=Rattus norvegicus OX=10116 GN=Ndrg3 PE=1 SV=1
Prefrontal-cortex	P70580	Pgrmc1	1.45773e-05	5.76282e-05	9.04711e-05	2.88254e-05	2.45373e-05	2.2785e-05	9.45016e-05	3.76166e-05	9.16836e-06	3.46623e-05	3.65548e-05	2.65069e-05	0.000477835	12	Membrane-associated progesterone receptor component 1 OS=Rattus norvegicus OX=10116 GN=Pgrmc1 PE=1 SV=3
Prefrontal-cortex	Q62688	Plcl1	2.51186e-06	9.66462e-07		4.42375e-06	9.51572e-06	1.43011e-05	1.37753e-06	5.05882e-06	4.7113e-06	6.91502e-06	7.92859e-06	4.83211e-06	6.25423e-05	11	Inactive phospholipase C-like protein 1 OS=Rattus norvegicus OX=10116 GN=Plcl1 PE=1 SV=1
Prefrontal-cortex	Q5U2N3	Pitpnm1	1.71628e-06	1.13262e-05			1.35827e-06	1.15877e-06	8.82219e-06	5.27369e-06	1.86392e-06	2.76174e-06	7.28136e-06	2.74121e-06	4.43036e-05	10	Membrane-associated phosphatidylinositol transfer protein 1 OS=Rattus norvegicus OX=10116 GN=Pitpnm1 PE=1 SV=1
Prefrontal-cortex	P29147	Bdh1	4.10217e-05	6.66304e-05	4.18935e-05	3.40772e-05	1.56206e-05	4.59472e-05	3.76622e-05	3.40668e-05	2.18383e-05	4.87291e-05	5.16891e-05	9.08783e-05	0.000530054	12	D-beta-hydroxybutyrate dehydrogenase, mitochondrial OS=Rattus norvegicus OX=10116 GN=Bdh1 PE=1 SV=2
Prefrontal-cortex	P61227	Rap2b	9.81134e-06	5.98014e-05	4.5517e-05	1.57263e-05	9.24924e-06	1.11094e-05	5.5748e-05	4.80189e-06	6.71623e-06	2.72791e-05	2.30369e-05	9.92467e-06	0.000278721	12	Ras-related protein Rap-2b OS=Rattus norvegicus OX=10116 GN=Rap2b PE=2 SV=1
Prefrontal-cortex	Q5M7A4	Uba5				2.0805e-06	5.64692e-06	7.4169e-06	7.2524e-06	1.12265e-05		1.05523e-05	1.02993e-05		5.44748e-05	7	Ubiquitin-like modifier-activating enzyme 5 OS=Rattus norvegicus OX=10116 GN=Uba5 PE=1 SV=1
Prefrontal-cortex	P62914	Rpl11	3.41454e-05	5.12397e-05	3.28886e-05	1.54928e-05	2.6656e-05	2.96131e-05	5.23748e-05	2.94514e-05	2.57969e-05	3.86145e-05	4.54604e-05	4.15337e-05	0.000423267	12	60S ribosomal protein L11 OS=Rattus norvegicus OX=10116 GN=Rpl11 PE=1 SV=2
Prefrontal-cortex	G3V9T7	Get3	4.16202e-05	3.69514e-05	2.5802e-05	2.71009e-05	2.08267e-05	2.14675e-05	2.64331e-05	2.64024e-05	6.50061e-06	2.71347e-05	2.53053e-05	2.36741e-05	0.000309219	12	ATPase Get3 OS=Rattus norvegicus OX=10116 GN=Get3 PE=1 SV=1
Prefrontal-cortex	P62246	Rps15a	8.84057e-05	7.29173e-05	0.000115339	3.38495e-05	5.88188e-05	6.55018e-05	6.42242e-05	5.96678e-05	4.9458e-05	0.000115138	0.000132709	0.00012306	0.000979088	12	40S ribosomal protein S15a OS=Rattus norvegicus OX=10116 GN=Rps15a PE=1 SV=2
Prefrontal-cortex	B2RZ37	Reep5	3.31368e-05	7.68911e-05	6.02718e-05	4.17337e-05	3.67531e-05	3.8737e-05	3.37396e-05	1.77006e-05	3.55272e-05	3.42919e-05	7.25072e-05	4.31546e-05	0.000524445	12	Receptor expression-enhancing protein 5 OS=Rattus norvegicus OX=10116 GN=Reep5 PE=1 SV=1
Prefrontal-cortex	P48679	Lmna		2.33649e-05	3.77186e-06	7.89054e-06		1.55308e-05	1.18838e-05			1.66794e-05	7.18084e-06	1.45125e-05	0.000100815	8	Prelamin-A/C OS=Rattus norvegicus OX=10116 GN=Lmna PE=1 SV=1
Prefrontal-cortex	Q5HZE4	Mri1	5.40128e-06	5.69324e-07	5.96612e-06	9.55575e-06	3.56215e-06	3.1952e-06	5.12435e-06	2.55785e-06	1.37572e-06	2.34182e-06	2.58043e-06	9.69884e-06	5.19288e-05	12	Methylthioribose-1-phosphate isomerase OS=Rattus norvegicus OX=10116 GN=Mri1 PE=1 SV=1
Prefrontal-cortex	P00406	Mtco2	1.0394e-05	7.60178e-05	4.22085e-05	1.69455e-05	4.05306e-05	1.68161e-05	2.33371e-05			5.94123e-05	1.29112e-05		0.000298573	9	Cytochrome c oxidase subunit 2 OS=Rattus norvegicus OX=10116 GN=Mtco2 PE=1 SV=3
Prefrontal-cortex	O08816	Wasl	1.96987e-06	7.8122e-07			1.55716e-06	3.17398e-06		1.03758e-06		1.42316e-06	3.2369e-06	6.35119e-06	1.95311e-05	8	Neural Wiskott-Aldrich syndrome protein OS=Rattus norvegicus OX=10116 GN=Wasl PE=1 SV=2
Prefrontal-cortex	P17078	Rpl35	3.06798e-05	3.98476e-05	4.1102e-05	1.27879e-05	2.30102e-05	3.9284e-05	3.16938e-05	2.36476e-05	2.33202e-05	2.90043e-05	4.35143e-05	3.49634e-05	0.000372855	12	60S ribosomal protein L35 OS=Rattus norvegicus OX=10116 GN=Rpl35 PE=1 SV=3
Prefrontal-cortex	Q5HZY2	Sar1b	7.66738e-06		1.12079e-05	7.68059e-06	8.88157e-06	1.34243e-05	9.41931e-05	3.59617e-06			6.20815e-06	8.22939e-06	0.000161088	9	GTP-binding protein SAR1b OS=Rattus norvegicus OX=10116 GN=Sar1b PE=2 SV=1
Prefrontal-cortex	Q7TT49	Cdc42bpb	9.80985e-07	2.47258e-05	7.7873e-07	1.72526e-07			4.62745e-07			6.47297e-07	4.38058e-06		3.21487e-05	7	Serine/threonine-protein kinase MRCK beta OS=Rattus norvegicus OX=10116 GN=Cdc42bpb PE=1 SV=1
Prefrontal-cortex	Q4QRB4	Tubb3	0.00266605	0.00213551	0.00255869	0.00177139	0.0023914	0.0023844	0.00200447	0.00237712	0.00220037	0.00247364	0.00236804	0.00279233	0.0281234	12	Tubulin beta-3 chain OS=Rattus norvegicus OX=10116 GN=Tubb3 PE=1 SV=1
Prefrontal-cortex	Q8K4M9	Osbpl1a	6.86544e-05	3.63418e-05	3.46445e-05	3.73706e-05	4.76211e-05	4.05933e-05	3.6328e-05	3.27233e-05	2.89964e-05	4.66712e-05	3.29623e-05	3.37622e-05	0.000476669	12	Oxysterol-binding protein-related protein 1 OS=Rattus norvegicus OX=10116 GN=Osbpl1a PE=1 SV=1
Prefrontal-cortex	Q63537	Syn2	2.47118e-05	3.22357e-05	5.14519e-05	2.83243e-05	5.05938e-06	2.10767e-05	2.80677e-05	4.83221e-05	1.07461e-05	4.62343e-05	2.53195e-05	2.86703e-05	0.00035022	12	Synapsin-2 OS=Rattus norvegicus OX=10116 GN=Syn2 PE=1 SV=1
Prefrontal-cortex	Q62950	Crmp1	0.00090655	0.000745415	0.0011028	0.000662532	0.000907594	0.00104719	0.000857245	0.00115077	0.000935578	0.00102258	0.00110103	0.00107665	0.0115159	12	Dihydropyrimidinase-related protein 1 OS=Rattus norvegicus OX=10116 GN=Crmp1 PE=1 SV=1
Prefrontal-cortex	P04797	Gapdh	0.00434714	0.00335342	0.00555209	0.00361582	0.00493733	0.00582232	0.00439156	0.00517457	0.00388318	0.00424832	0.00532642	0.0045184	0.0551706	12	Glyceraldehyde-3-phosphate dehydrogenase OS=Rattus norvegicus OX=10116 GN=Gapdh PE=1 SV=3
Prefrontal-cortex	P17105	Itpka	6.15037e-05	5.64597e-05	8.07928e-05	3.69339e-05	4.66991e-05	3.39527e-05	2.9617e-05	3.48873e-05	3.37748e-05	2.46591e-05	1.83053e-05	4.35171e-05	0.000501102	12	Inositol-trisphosphate 3-kinase A OS=Rattus norvegicus OX=10116 GN=Itpka PE=1 SV=3
Prefrontal-cortex	P04631	S100b	0.000481553	0.00044611	0.000737651	0.000546404	0.0004749	0.000602742	0.000169618	0.000355406	0.000315624	0.000357782	0.000577755	0.000387924	0.00545347	12	Protein S100-B OS=Rattus norvegicus OX=10116 GN=S100b PE=1 SV=2
Prefrontal-cortex	P19945	Rplp0	6.01917e-05	8.92012e-05	8.12742e-05	3.16503e-05	6.38756e-05	5.86748e-05	0.000110069	5.81559e-05	8.50474e-05	0.00012006	0.000136418	0.000107461	0.00100208	12	60S acidic ribosomal protein P0 OS=Rattus norvegicus OX=10116 GN=Rplp0 PE=1 SV=2
Prefrontal-cortex	P18418	Calr	0.000364596	0.000190025	0.000369532	0.000250753	0.000300407	0.000420575	0.000240426	0.000320608	0.000292098	0.000233957	0.000289147	0.000339024	0.00361115	12	Calreticulin OS=Rattus norvegicus OX=10116 GN=Calr PE=1 SV=1
Prefrontal-cortex	Q9ESB5	Necab1	2.81181e-05	3.68758e-05	2.31822e-05	1.89824e-05	9.24743e-06	1.48601e-05	1.18088e-05	2.95806e-05	8.09167e-06	9.49969e-06	1.66139e-05	2.08467e-05	0.000227707	12	N-terminal EF-hand calcium-binding protein 1 OS=Rattus norvegicus OX=10116 GN=Necab1 PE=1 SV=1
Prefrontal-cortex	O09175	Rnpep	9.73007e-05	5.24138e-05	7.67135e-05	6.85969e-05	8.69537e-05	9.3424e-05	4.35443e-05	8.01738e-05	6.63434e-05	5.2946e-05	5.32347e-05	6.14793e-05	0.000833124	12	Aminopeptidase B OS=Rattus norvegicus OX=10116 GN=Rnpep PE=1 SV=2
Prefrontal-cortex	P59215	Gnao1	1.47323e-05	7.41773e-05	9.31935e-05	2.74443e-05	3.27412e-05	3.74866e-05	9.95742e-05	2.77756e-05	3.3871e-05	7.86237e-05	7.54397e-05	2.74466e-05	0.000622506	12	Guanine nucleotide-binding protein G(o) subunit alpha OS=Rattus norvegicus OX=10116 GN=Gnao1 PE=1 SV=2
Prefrontal-cortex	F1M4A4	Kif1a	1.33316e-05	8.57201e-06	6.35814e-06	4.93499e-06	1.07562e-05	3.37711e-06	3.02583e-06	1.35526e-05	5.83084e-06	6.39504e-06	8.57355e-06	1.35287e-05	9.82367e-05	12	Kinesin-like protein KIF1A OS=Rattus norvegicus OX=10116 GN=Kif1a PE=1 SV=3
Prefrontal-cortex	P0C5X8	Ttyh1	1.93622e-05	6.97362e-05	4.47054e-05	2.8792e-05	1.15762e-05	8.88085e-06	1.28193e-05			1.28616e-05	8.13498e-06	3.545e-06	0.000220414	10	Protein tweety homolog 1 OS=Rattus norvegicus OX=10116 GN=Ttyh1 PE=1 SV=1
Prefrontal-cortex	P37805	Tagln3	0.000180808	0.00024349	0.000264239	0.000145637	0.000367584	0.000303164	0.000365762	0.000338425	0.000249118	0.000427145	0.000329878	0.000288082	0.00350333	12	Transgelin-3 OS=Rattus norvegicus OX=10116 GN=Tagln3 PE=1 SV=2
Prefrontal-cortex	P30835	Pfkl	0.000159175	0.000110316	9.49773e-05	7.48443e-05	0.000111554	0.000135602	0.000159678	0.00016672	0.000146135	0.000177175	0.000211588	0.000286766	0.00183453	12	ATP-dependent 6-phosphofructokinase, liver type OS=Rattus norvegicus OX=10116 GN=Pfkl PE=1 SV=3
Prefrontal-cortex	O88506	Stk39	2.74349e-05	3.41574e-05	5.0178e-05	2.23433e-05	7.49181e-05	4.51048e-05	2.94126e-05	5.00896e-05	3.36856e-05	7.38691e-05	3.62743e-05	5.52789e-05	0.000532747	12	STE20/SPS1-related proline-alanine-rich protein kinase OS=Rattus norvegicus OX=10116 GN=Stk39 PE=1 SV=2
Prefrontal-cortex	Q01986	Map2k1	0.000165618	0.000110336	0.000172498	0.000119393	0.000166567	0.00013585	0.000136692	0.000225827	0.000161248	0.000169422	0.000209514	0.000166427	0.00193939	12	Dual specificity mitogen-activated protein kinase kinase 1 OS=Rattus norvegicus OX=10116 GN=Map2k1 PE=1 SV=2
Prefrontal-cortex	Q5I0G4	Gars1	4.02344e-05	1.14331e-05	2.91956e-05	1.67734e-05	4.30919e-05	5.05618e-05	2.33867e-05	5.51034e-05	1.25188e-05	3.04253e-05	2.60126e-05	3.56594e-05	0.000374396	12	Glycine--tRNA ligase OS=Rattus norvegicus OX=10116 GN=Gars1 PE=1 SV=2
Prefrontal-cortex	P09117	Aldoc	0.00118896	0.000765511	0.00120202	0.00085656	0.00127977	0.00142825	0.00142017	0.00178407	0.00131573	0.00115711	0.00128701	0.00134006	0.0150252	12	Fructose-bisphosphate aldolase C OS=Rattus norvegicus OX=10116 GN=Aldoc PE=1 SV=3
Prefrontal-cortex	Q711G3	Iah1	6.05222e-06		4.71516e-06	3.94625e-06	5.02049e-06	7.44002e-06	4.33904e-06	6.75724e-06	6.23303e-06	5.92756e-06	7.2383e-06	5.68221e-06	6.33515e-05	11	Isoamyl acetate-hydrolyzing esterase 1 homolog OS=Rattus norvegicus OX=10116 GN=Iah1 PE=2 SV=2
Prefrontal-cortex	P11232	Txn	0.000282253	0.000219102	0.000221627	0.000155072	0.00023429	0.000241258	0.000169765	0.000304815	0.000290909	0.000223973	0.000232911	0.000371131	0.00294711	12	Thioredoxin OS=Rattus norvegicus OX=10116 GN=Txn PE=1 SV=2
Prefrontal-cortex	O88761	Psmd1	2.77699e-05	1.13953e-05	2.2404e-05	2.21151e-05	2.29202e-05	2.51334e-05	2.74127e-05	3.06576e-05	2.98931e-05	6.49271e-05	3.6796e-05	4.06635e-05	0.000362088	12	26S proteasome non-ATPase regulatory subunit 1 OS=Rattus norvegicus OX=10116 GN=Psmd1 PE=1 SV=1
Prefrontal-cortex	Q9ERH3	Wdr7	1.67612e-06	1.7772e-06	4.47524e-06	2.84558e-06	5.79297e-06	4.149e-06	5.10647e-06	5.8296e-06	5.15415e-06	4.26976e-06	5.97148e-06	4.90338e-06	5.19509e-05	12	WD repeat-containing protein 7 OS=Rattus norvegicus OX=10116 GN=Wdr7 PE=1 SV=1
Prefrontal-cortex	Q99NA5	Idh3a	0.000797662	0.000529425	0.000803768	0.000567365	0.00238749	0.00199657	0.000533262	0.000611425	0.00054001	0.000653225	0.000817382	0.000710276	0.0109479	12	Isocitrate dehydrogenase [NAD] subunit alpha, mitochondrial OS=Rattus norvegicus OX=10116 GN=Idh3a PE=1 SV=1
Prefrontal-cortex	P42123	Ldhb	0.00249681	0.00196292	0.00239302	0.00158491	0.00204808	0.00231339	0.00203019	0.00242117	0.00251201	0.00229799	0.00240046	0.00205017	0.0265111	12	L-lactate dehydrogenase B chain OS=Rattus norvegicus OX=10116 GN=Ldhb PE=1 SV=2
Prefrontal-cortex	P42346	Mtor	4.43236e-06	1.31087e-06	2.22365e-05	8.60681e-06	2.02343e-05	5.51003e-06	1.98272e-06	3.06664e-06	5.60695e-07	6.03275e-06	1.61027e-05	4.5558e-06	9.46321e-05	12	Serine/threonine-protein kinase mTOR OS=Rattus norvegicus OX=10116 GN=Mtor PE=1 SV=1
Prefrontal-cortex	P85969	Napb	0.000106262	0.000233984	0.000285839	0.000167724	0.000167907	0.000187623	0.000292289	0.000162466	9.75813e-05	0.000236919	0.000195075	0.000114626	0.0022483	12	Beta-soluble NSF attachment protein OS=Rattus norvegicus OX=10116 GN=Napb PE=1 SV=1
Prefrontal-cortex	P62630	Eef1a1	0.000186687	0.000193621	0.00023601	0.000157352	0.000289844	0.000256152	0.00023075	0.000303913	0.000155724	0.000271199	0.000276806	0.000233534	0.00279159	12	Elongation factor 1-alpha 1 OS=Rattus norvegicus OX=10116 GN=Eef1a1 PE=2 SV=1
Prefrontal-cortex	Q05140-2	Snap91	7.76774e-06	9.91032e-06			6.97815e-06	1.50021e-05	9.07251e-06	1.60701e-05	1.49994e-05	1.57699e-05	1.78109e-05	8.05078e-06	0.000121432	10	Isoform 2 of Clathrin coat assembly protein AP180 OS=Rattus norvegicus OX=10116 GN=Snap91
Prefrontal-cortex	P15205	Map1b	0.000228061	0.000835944	0.000548856	0.000236527	0.000514351	0.000425989	0.000597356	0.000246235	0.000191645	0.000515485	0.000285709	0.00025723	0.00488339	12	Microtubule-associated protein 1B OS=Rattus norvegicus OX=10116 GN=Map1b PE=1 SV=3
Prefrontal-cortex	Q62785	Pdap1	1.0647e-05			4.37689e-06	1.02264e-05	1.20344e-05		8.35328e-06	6.0336e-06	1.61286e-05	1.77033e-05	1.26192e-05	9.81227e-05	9	28 kDa heat- and acid-stable phosphoprotein OS=Rattus norvegicus OX=10116 GN=Pdap1 PE=1 SV=1
Prefrontal-cortex	Q05175	Basp1	0.00014496	0.000527876	0.00054669	0.000226603	0.000226188	0.000233506	0.000631797	0.000189663	0.000203888	0.00037545	0.000396621	0.000154667	0.00385791	12	Brain acid soluble protein 1 OS=Rattus norvegicus OX=10116 GN=Basp1 PE=1 SV=2
Prefrontal-cortex	P45592	Cfl1	0.0015978	0.0011134	0.00126947	0.000845942	0.00120229	0.00142563	0.00100123	0.00117052	0.00119321	0.00124229	0.00113126	0.00158275	0.0147758	12	Cofilin-1 OS=Rattus norvegicus OX=10116 GN=Cfl1 PE=1 SV=3
Prefrontal-cortex	P06687	Atp1a3	0.000346148	0.00192176	0.00164132	0.000428724	0.000528951	0.000534777	0.00130486	0.00032315	0.000157425	0.00105735	0.000653986	0.000347469	0.00924592	12	Sodium/potassium-transporting ATPase subunit alpha-3 OS=Rattus norvegicus OX=10116 GN=Atp1a3 PE=1 SV=2
Prefrontal-cortex	P11348	Qdpr	5.49804e-05	2.19378e-05	9.46808e-05	3.17191e-05	0.000172845	0.000163403	0.000150093	0.000233599	0.000200788	0.00011202	0.000124582	0.000209433	0.00157008	12	Dihydropteridine reductase OS=Rattus norvegicus OX=10116 GN=Qdpr PE=1 SV=1
Prefrontal-cortex	P13383	Ncl	9.99807e-05	0.000826811	4.89096e-05	3.81423e-05	6.29703e-05	6.23635e-05	7.08405e-05	6.85585e-05	9.70214e-05	9.70339e-05	9.70854e-05	0.000117526	0.00168724	12	Nucleolin OS=Rattus norvegicus OX=10116 GN=Ncl PE=1 SV=3
Prefrontal-cortex	P84087	Cplx2	0.000164317	0.00011653	0.00017642	0.000133659	0.000123239	0.000178577	6.78942e-05	0.000132803	0.000125724	8.55568e-05	0.000105276	0.000132305	0.0015423	12	Complexin-2 OS=Rattus norvegicus OX=10116 GN=Cplx2 PE=1 SV=1
Prefrontal-cortex	Q6PDU1	Srsf2	2.40381e-05	2.18088e-05	2.28028e-05	1.7307e-05	2.65209e-05	4.00879e-05			2.17349e-05	3.61774e-05	3.25887e-05	1.82674e-05	0.000261334	10	Serine/arginine-rich splicing factor 2 OS=Rattus norvegicus OX=10116 GN=Srsf2 PE=1 SV=3
Prefrontal-cortex	P61751	Arf4	5.90455e-06	1.23204e-05	9.56103e-06	6.90308e-06	7.98321e-06	8.46133e-06	1.93259e-06	5.08101e-06	3.11351e-06	7.19336e-06	7.18604e-06	6.56231e-06	8.22024e-05	12	ADP-ribosylation factor 4 OS=Rattus norvegicus OX=10116 GN=Arf4 PE=2 SV=2
Prefrontal-cortex	P62815	Atp6v1b2	0.000702758	0.00109809	0.00109073	0.000586518	0.0010118	0.000939527	0.00150654	0.00126316	0.00120202	0.000999279	0.00130259	0.00124484	0.0129478	12	V-type proton ATPase subunit B, brain isoform OS=Rattus norvegicus OX=10116 GN=Atp6v1b2 PE=1 SV=1
Prefrontal-cortex	Q68FQ0	Cct5	8.72485e-05	7.12474e-05	0.000172786	0.000138774	0.000134844	0.000129029	0.000117035	0.000184604	8.59778e-05	0.000143355	0.000183191	0.000106373	0.00155446	12	T-complex protein 1 subunit epsilon OS=Rattus norvegicus OX=10116 GN=Cct5 PE=1 SV=1
Prefrontal-cortex	Q5XIG8	Strap	2.10218e-05	1.25647e-05	9.12406e-05	7.28337e-05	6.40475e-05	0.00011713	2.87642e-05	8.66436e-05	3.29657e-05	2.02055e-05	6.51763e-05	3.52969e-05	0.00064789	12	Serine-threonine kinase receptor-associated protein OS=Rattus norvegicus OX=10116 GN=Strap PE=1 SV=1
Prefrontal-cortex	P30009	Marcks	0.000140539	0.000168174	0.000168899	9.25121e-05	8.77428e-05	0.000135866	0.000112379	7.12805e-05	6.03574e-05	7.57457e-05	0.000139128	4.38221e-05	0.00129645	12	Myristoylated alanine-rich C-kinase substrate OS=Rattus norvegicus OX=10116 GN=Marcks PE=1 SV=2
Prefrontal-cortex	P17220	Psma2	3.78688e-05	2.6277e-05	3.13302e-05	9.90268e-06	1.561e-05	2.17268e-05	1.86731e-05	2.2983e-05	2.62117e-05	2.20197e-05	3.98935e-05	4.40022e-05	0.000316499	12	Proteasome subunit alpha type-2 OS=Rattus norvegicus OX=10116 GN=Psma2 PE=1 SV=3
Prefrontal-cortex	P15999	Atp5f1a	0.000683459	0.000960207	0.000802215	0.000668031	0.000711767	0.000569515	0.000560249	0.000420194	0.00028765	0.000828017	0.000497177	0.000300703	0.00728919	12	ATP synthase subunit alpha, mitochondrial OS=Rattus norvegicus OX=10116 GN=Atp5f1a PE=1 SV=2
Prefrontal-cortex	Q63941	Rab3b	2.16317e-05	1.77323e-05	1.99639e-05	2.50928e-05	1.78495e-05	1.78502e-05	1.97213e-05	1.79465e-05	1.6393e-05	2.05864e-05	2.10706e-05	2.13125e-05	0.000237151	12	Ras-related protein Rab-3B OS=Rattus norvegicus OX=10116 GN=Rab3b PE=1 SV=2
Prefrontal-cortex	P63331	Ppp2ca	2.70617e-05	1.5276e-05			1.9633e-05				2.20338e-05	1.92751e-05	2.08479e-05	2.23775e-05	0.000146505	7	Serine/threonine-protein phosphatase 2A catalytic subunit alpha isoform OS=Rattus norvegicus OX=10116 GN=Ppp2ca PE=1 SV=1
Prefrontal-cortex	P35465	Pak1	5.75102e-05	2.02538e-05	6.50212e-05	5.28521e-05	6.74593e-05	7.54163e-05	4.70176e-05	7.03177e-05	4.09014e-05	4.44522e-05	2.52524e-05	3.72211e-05	0.000603675	12	Serine/threonine-protein kinase PAK 1 OS=Rattus norvegicus OX=10116 GN=Pak1 PE=1 SV=3
Prefrontal-cortex	O35567	Atic	6.90385e-05	3.32652e-05	4.012e-05	4.84789e-05	5.9475e-05	8.24089e-05	6.93937e-05	0.000119145	8.79314e-05	6.23765e-05	9.43903e-05	8.36893e-05	0.000849712	12	Bifunctional purine biosynthesis protein ATIC OS=Rattus norvegicus OX=10116 GN=Atic PE=1 SV=2
Prefrontal-cortex	P84100	Rpl19	1.14951e-05	1.4458e-05	9.84458e-06	8.88282e-06	9.58057e-06	1.63322e-05	2.10208e-05	1.30677e-05	1.08134e-05	1.71195e-05	1.50296e-05	1.11982e-05	0.000158842	12	60S ribosomal protein L19 OS=Rattus norvegicus OX=10116 GN=Rpl19 PE=1 SV=1
Prefrontal-cortex	Q4KMA2	Rad23b	4.08463e-05	3.15704e-05	8.69322e-05	7.11125e-05	7.35302e-05	8.46524e-05	6.83217e-05	0.000100831	6.2499e-05	7.13194e-05	0.000104773	6.8181e-05	0.00086457	12	UV excision repair protein RAD23 homolog B OS=Rattus norvegicus OX=10116 GN=Rad23b PE=1 SV=1
Prefrontal-cortex	Q64537	Capns1	1.58771e-05	1.52724e-05	1.23432e-05	1.21391e-05	9.58758e-06	1.77286e-05	1.19094e-05	2.30041e-05	1.63369e-05	1.37195e-05	2.35664e-05	1.75103e-05	0.000188995	12	Calpain small subunit 1 OS=Rattus norvegicus OX=10116 GN=Capns1 PE=1 SV=3
Prefrontal-cortex	O35509	Rab11b	4.83239e-05	6.07047e-05	3.2748e-05	2.11138e-05	2.60348e-05	1.96981e-05	3.22682e-05	2.78219e-05	3.21109e-05	3.33224e-05	4.06715e-05	3.92531e-05	0.000414071	12	Ras-related protein Rab-11B OS=Rattus norvegicus OX=10116 GN=Rab11b PE=1 SV=4
Prefrontal-cortex	Q01062	Pde2a	4.96805e-05	0.000143231	9.12825e-05	2.27795e-05	3.26278e-05	2.32052e-05	8.47601e-05	3.24278e-05	3.17377e-05	5.53445e-05	3.11549e-05	3.61642e-05	0.000634395	12	cGMP-dependent 3',5'-cyclic phosphodiesterase OS=Rattus norvegicus OX=10116 GN=Pde2a PE=1 SV=2
Prefrontal-cortex	Q5XI72	Eif4h	1.48578e-05	1.76702e-05	3.6914e-05	2.8143e-05	2.76756e-05	3.07486e-05	3.77967e-05	4.99076e-05	2.67868e-05	4.31265e-05	2.69549e-05	2.11613e-05	0.000361743	12	Eukaryotic translation initiation factor 4H OS=Rattus norvegicus OX=10116 GN=Eif4h PE=1 SV=1
Prefrontal-cortex	P49432	Pdhb	0.000503185	0.000404304	0.000791137	0.00039612	0.000624804	0.000537966	0.000471727	0.000570073	0.000366692	0.000747926	0.00101605	0.000448069	0.00687806	12	Pyruvate dehydrogenase E1 component subunit beta, mitochondrial OS=Rattus norvegicus OX=10116 GN=Pdhb PE=1 SV=2
Prefrontal-cortex	P18421	Psmb1	1.3282e-05	1.53755e-05	4.19708e-05	2.52255e-05	3.60595e-05	4.36646e-05	4.25174e-05	5.34105e-05	2.76566e-05	4.68528e-05	5.18314e-05	3.2885e-05	0.000430731	12	Proteasome subunit beta type-1 OS=Rattus norvegicus OX=10116 GN=Psmb1 PE=1 SV=3
Prefrontal-cortex	Q5PPJ9	Sh3glb2	0.00025608	0.000228904	0.000201546	0.000138877	0.000197733	0.000160945	0.000163054	0.000190009	0.000168808	0.000174145	0.000178758	0.000200825	0.00225969	12	Endophilin-B2 OS=Rattus norvegicus OX=10116 GN=Sh3glb2 PE=1 SV=2
Prefrontal-cortex	Q4QQT4	Ppp2r1b	0.000172765	0.000134651	9.25592e-05	6.72455e-05	0.000106107	0.000121693	0.0001019	0.000112592	0.000124605	0.000144317	0.000119305	0.00016411	0.00146185	12	Serine/threonine-protein phosphatase 2A 65 kDa regulatory subunit A beta isoform OS=Rattus norvegicus OX=10116 GN=Ppp2r1b PE=2 SV=1
Prefrontal-cortex	P85968	Pgd	5.50479e-05	3.91315e-05	4.30258e-05	3.33824e-05	4.26065e-05	6.15841e-05	3.4742e-05	5.27907e-05	3.93601e-05	5.09413e-05	5.9916e-05	5.56708e-05	0.000568199	12	6-phosphogluconate dehydrogenase, decarboxylating OS=Rattus norvegicus OX=10116 GN=Pgd PE=1 SV=1
Prefrontal-cortex	Q99PD4	Arpc1a	0.000230101	0.000201676	0.000219022	0.000178387	0.000206033	0.000189374	0.000162984	0.000175859	0.000157898	0.000148436	0.00017256	0.000186614	0.00222894	12	Actin-related protein 2/3 complex subunit 1A OS=Rattus norvegicus OX=10116 GN=Arpc1a PE=2 SV=1
Prefrontal-cortex	Q62717	Cadps	0.00057629	0.000325622	0.000418043	0.00029466	0.000407884	0.000421444	0.000398701	0.000608344	0.000350026	0.000427663	0.000461375	0.000468838	0.00515889	12	Calcium-dependent secretion activator 1 OS=Rattus norvegicus OX=10116 GN=Cadps PE=1 SV=1
Prefrontal-cortex	P18088	Gad1	2.12504e-05	5.24263e-06	1.88109e-05	7.30656e-06	1.08053e-05	1.39066e-05	1.98381e-05	5.4884e-05	2.03172e-05	1.66356e-05	4.3989e-05	1.55391e-05	0.000248526	12	Glutamate decarboxylase 1 OS=Rattus norvegicus OX=10116 GN=Gad1 PE=1 SV=1
Prefrontal-cortex	P07340	Atp1b1	0.000215836	0.00115689	0.00108481	0.000277358	0.000355302	0.000395229	0.000796713	0.000219581	0.00016831	0.000708309	0.000359024	0.00028345	0.00602081	12	Sodium/potassium-transporting ATPase subunit beta-1 OS=Rattus norvegicus OX=10116 GN=Atp1b1 PE=1 SV=1
Prefrontal-cortex	Q9ES40	Arl6ip5	1.46113e-05	2.70858e-05	1.10803e-05	7.87308e-06	7.53452e-06	5.02602e-06	1.19921e-05	1.45463e-07	1.13739e-05	8.99367e-06	1.22661e-05	1.06436e-05	0.000128626	12	PRA1 family protein 3 OS=Rattus norvegicus OX=10116 GN=Arl6ip5 PE=1 SV=1
Prefrontal-cortex	P50878	Rpl4	8.50691e-05	0.000145089	9.589e-05	5.18612e-05	8.27852e-05	0.000101217	0.000136747	6.67915e-05	9.38889e-05	0.00014611	0.000163543	0.000119717	0.00128871	12	60S ribosomal protein L4 OS=Rattus norvegicus OX=10116 GN=Rpl4 PE=1 SV=3
Prefrontal-cortex	P63055	Pcp4	9.21429e-05		9.79894e-05	5.93452e-05	8.3257e-05	7.54112e-05	7.05095e-05	0.000113532	6.00461e-05	9.64889e-05	5.60224e-05	8.59893e-05	0.000890734	11	Calmodulin regulator protein PCP4 OS=Rattus norvegicus OX=10116 GN=Pcp4 PE=1 SV=2
Prefrontal-cortex	Q64548-2	Rtn1	0.000138605	0.000268674	0.000171309	0.000145022	8.41046e-05	0.00011561	0.00023485	7.23038e-05	0.000163937	0.000152867	0.00014729	0.000156929	0.0018515	12	Isoform RTN1-S of Reticulon-1 OS=Rattus norvegicus OX=10116 GN=Rtn1
Prefrontal-cortex	Q05962	Slc25a4	0.000129383	0.000413143	0.000174037	0.000135835	0.000151989	7.98524e-05	0.000116478	1.59506e-05	1.38362e-05	0.000210014	6.91142e-05	7.87871e-06	0.00151751	12	ADP/ATP translocase 1 OS=Rattus norvegicus OX=10116 GN=Slc25a4 PE=1 SV=3
Prefrontal-cortex	P08461	Dlat	0.000452657	0.000516519	0.000567774	0.000265875	0.000348588	0.000393652	0.000577668	0.000571493	0.000522999	0.000628535	0.000967904	0.000566428	0.00638009	12	Dihydrolipoyllysine-residue acetyltransferase component of pyruvate dehydrogenase complex, mitochondrial OS=Rattus norvegicus OX=10116 GN=Dlat PE=1 SV=3
Prefrontal-cortex	P47875	Csrp1	4.23807e-05	8.90558e-06	4.54351e-05	1.68686e-05	3.43425e-05	6.59968e-05	5.15454e-05	0.000103329	8.76679e-05	9.34441e-05	0.000101396	7.63986e-05	0.00072771	12	Cysteine and glycine-rich protein 1 OS=Rattus norvegicus OX=10116 GN=Csrp1 PE=1 SV=2
Prefrontal-cortex	Q00715	Histone H2B type 1 OS=Rattus norvegicus OX=10116	3.36117e-05	0.000360223	0.000146857	5.31423e-05	9.81687e-05	8.70111e-05	0.000162876	2.4364e-05	3.46562e-05	0.00020045	5.87944e-05	7.73604e-05	0.00133752	12	Histone H2B type 1 OS=Rattus norvegicus OX=10116 PE=1 SV=2
Prefrontal-cortex	P20156	Vgf	2.11894e-06	6.70125e-06	2.14027e-05	1.76848e-05	2.62901e-06	4.53882e-06	2.94163e-05	5.42427e-05	2.41239e-05	2.26417e-05	2.41886e-05	2.7877e-05	0.000237566	12	Neurosecretory protein VGF OS=Rattus norvegicus OX=10116 GN=Vgf PE=1 SV=3
Prefrontal-cortex	P62832	Rpl23	2.36431e-05	4.81542e-05	4.28465e-05	4.0895e-05	1.45543e-05	3.44826e-05	7.32025e-05	5.67514e-05	1.01962e-05	1.24837e-05	1.26245e-05	3.77263e-05	0.00040756	12	60S ribosomal protein L23 OS=Rattus norvegicus OX=10116 GN=Rpl23 PE=2 SV=1
Prefrontal-cortex	P97536	Cand1	0.000459336	0.000408024	0.00039411	0.000295939	0.000421006	0.000388253	0.000434535	0.000483169	0.00048456	0.000473948	0.000566958	0.000574005	0.00538384	12	Cullin-associated NEDD8-dissociated protein 1 OS=Rattus norvegicus OX=10116 GN=Cand1 PE=1 SV=1
Prefrontal-cortex	P07943	Akr1b1	0.000341946	0.000367392	0.000141911	8.98452e-05	9.83514e-05	0.000172787	8.58584e-05	0.000164086	0.000238512	8.32714e-05	0.000143559	0.000331486	0.002259	12	Aldo-keto reductase family 1 member B1 OS=Rattus norvegicus OX=10116 GN=Akr1b1 PE=1 SV=3
Prefrontal-cortex	A2RUW1	Tollip	2.93899e-05	2.44329e-05	3.96426e-05	2.27084e-05	1.92419e-05	2.47501e-05	3.29985e-05	4.19415e-05	4.30802e-05	3.57925e-05	3.61921e-05	5.61833e-05	0.000406354	12	Toll-interacting protein OS=Rattus norvegicus OX=10116 GN=Tollip PE=1 SV=1
Prefrontal-cortex	Q6AZ50	Atg3	8.14966e-06			1.93862e-06		1.39114e-05	5.81627e-06	1.36338e-05	9.19138e-06	4.12631e-06	6.11274e-06	9.53182e-06	7.2412e-05	9	Ubiquitin-like-conjugating enzyme ATG3 OS=Rattus norvegicus OX=10116 GN=Atg3 PE=2 SV=1
Prefrontal-cortex	Q6IMY8	Hnrnpu	0.000292529	0.000120458	0.000290192	0.000129944	0.000270511	0.000129032	0.000191045	0.000100693	8.38318e-05	0.000179576	0.000183312	0.000136799	0.00210792	12	Heterogeneous nuclear ribonucleoprotein U OS=Rattus norvegicus OX=10116 GN=Hnrnpu PE=1 SV=1
Prefrontal-cortex	O70351	Hsd17b10	3.41095e-05	1.7828e-05	7.43533e-05	6.21009e-05	4.41606e-05	5.71449e-05	5.08283e-05	5.77108e-05	2.88227e-05	5.86126e-05	8.91598e-05	3.50336e-05	0.000609865	12	3-hydroxyacyl-CoA dehydrogenase type-2 OS=Rattus norvegicus OX=10116 GN=Hsd17b10 PE=1 SV=3
Prefrontal-cortex	Q5RKI1	Eif4a2	0.000237239	0.000200733	0.000189907	0.00014889	0.000206277	0.000257132	0.000304241	0.000319615	0.000203342	0.000270497	0.000275779	0.000268971	0.00288262	12	Eukaryotic initiation factor 4A-II OS=Rattus norvegicus OX=10116 GN=Eif4a2 PE=1 SV=1
Prefrontal-cortex	Q794F9	Slc3a2	1.23125e-05	0.00013726	9.2109e-05	1.08758e-05	1.13084e-05	3.56188e-05	5.11221e-05	1.89788e-06	2.04852e-06	5.13112e-05	4.85157e-05	5.77549e-06	0.000460156	12	4F2 cell-surface antigen heavy chain OS=Rattus norvegicus OX=10116 GN=Slc3a2 PE=1 SV=1
Prefrontal-cortex	O35331	Pdxk	6.96504e-05	5.54909e-05	6.91215e-05	6.02837e-05	9.63577e-05	9.99041e-05	9.45351e-05	0.000134208	0.000104082	0.000115597	0.000123412	0.000140812	0.00116345	12	Pyridoxal kinase OS=Rattus norvegicus OX=10116 GN=Pdxk PE=1 SV=1
Prefrontal-cortex	Q99JD4	Clasp2	1.26882e-05	3.29645e-05	1.40558e-05	2.90302e-05	4.8671e-05	1.32575e-05	5.22172e-05	2.97334e-05	1.36915e-05	2.35964e-05	4.87793e-05	2.87451e-05	0.00034743	12	CLIP-associating protein 2 OS=Rattus norvegicus OX=10116 GN=Clasp2 PE=1 SV=1
Prefrontal-cortex	P13233	Cnp	0.000272558	0.000241728	0.000344923	0.000142533	0.000696336	0.000972889	0.000955611	0.000759222	0.00111072	0.000882205	0.00097901	0.00106063	0.00841837	12	2',3'-cyclic-nucleotide 3'-phosphodiesterase OS=Rattus norvegicus OX=10116 GN=Cnp PE=1 SV=2
Prefrontal-cortex	P09895	Rpl5	1.65973e-05	1.65432e-05	4.07378e-05	1.48901e-05	2.89372e-05	3.89252e-05	6.36579e-05	3.47284e-05	1.37694e-05	4.96687e-05	5.52352e-05	2.62941e-05	0.000399984	12	60S ribosomal protein L5 OS=Rattus norvegicus OX=10116 GN=Rpl5 PE=1 SV=3
Prefrontal-cortex	Q499N5	Acsf2	2.41874e-05	1.06939e-05	4.27628e-05	2.25089e-05	2.7971e-05	3.03741e-05	4.63302e-05	4.69801e-05	1.83082e-05	4.02867e-05	3.27516e-05	1.36111e-05	0.000356766	12	Medium-chain acyl-CoA ligase ACSF2, mitochondrial OS=Rattus norvegicus OX=10116 GN=Acsf2 PE=2 SV=1
Prefrontal-cortex	Q63198	Cntn1	8.63878e-05	0.000525975	0.000499926	0.000131238	0.000208965	0.000290597	0.000373135	0.000152788	0.000207365	0.000374098	0.000416165	0.000182901	0.00344954	12	Contactin-1 OS=Rattus norvegicus OX=10116 GN=Cntn1 PE=1 SV=2
Prefrontal-cortex	Q62812	Myh9		1.90931e-05	2.28084e-06		7.73494e-07		1.67166e-05	1.86152e-06		4.12323e-06	6.30808e-06		5.1157e-05	7	Myosin-9 OS=Rattus norvegicus OX=10116 GN=Myh9 PE=1 SV=3
Prefrontal-cortex	Q6RJR6	Rtn3	8.52715e-05	0.000114229	0.000101775	7.01636e-05	9.73886e-05	9.54774e-05	7.57455e-05	5.00644e-05	5.93555e-05	6.23911e-05	7.46952e-05	5.2876e-05	0.000939433	12	Reticulon-3 OS=Rattus norvegicus OX=10116 GN=Rtn3 PE=1 SV=1
Prefrontal-cortex	P61314	Rpl15	2.30964e-05	4.3805e-05	2.33011e-05	1.46133e-05	4.69799e-06	1.43019e-05	4.55462e-05	2.66533e-05	2.72454e-05	3.06986e-05	4.2183e-05	3.74361e-05	0.000333578	12	60S ribosomal protein L15 OS=Rattus norvegicus OX=10116 GN=Rpl15 PE=1 SV=2
Prefrontal-cortex	Q7TPB1	Cct4	0.000164064	0.000146146	0.000142222	9.92088e-05	0.0001257	0.00012881	0.000160629	0.000174045	0.000163879	0.000177238	0.000221765	0.000224423	0.00192813	12	T-complex protein 1 subunit delta OS=Rattus norvegicus OX=10116 GN=Cct4 PE=1 SV=3
Prefrontal-cortex	Q5RJQ4	Sirt2	3.60947e-05	4.29228e-05	2.5e-05	2.20498e-05	5.53223e-05	5.62213e-05	9.35592e-05	9.49219e-05	9.57551e-05	7.82852e-05	0.000134074	8.78698e-05	0.000822077	12	NAD-dependent protein deacetylase sirtuin-2 OS=Rattus norvegicus OX=10116 GN=Sirt2 PE=1 SV=1
Prefrontal-cortex	B0BN18	Pfdn2	8.7757e-06		7.24759e-06	5.51916e-06	8.9289e-06	9.82926e-06	3.07882e-06	9.51634e-06	1.03644e-05	6.23772e-06	6.15701e-06	1.2114e-05	8.77689e-05	11	Prefoldin subunit 2 OS=Rattus norvegicus OX=10116 GN=Pfdn2 PE=2 SV=1
Prefrontal-cortex	P62898	Cycs	0.000671045	0.000982816	0.000640918	0.000176597	0.000300276	0.000276208	0.000544532	0.000386055	0.000460015	0.00061481	0.000571034	0.000546437	0.00617074	12	Cytochrome c, somatic OS=Rattus norvegicus OX=10116 GN=Cycs PE=1 SV=2
Prefrontal-cortex	Q80U96	Xpo1	4.06795e-05	3.34997e-05	2.91538e-05	2.6372e-05	4.18027e-05	4.27967e-05	4.39861e-05	5.20324e-05	3.74863e-05	3.56916e-05	5.73994e-05	5.67842e-05	0.000497684	12	Exportin-1 OS=Rattus norvegicus OX=10116 GN=Xpo1 PE=1 SV=1
Prefrontal-cortex	Q99MZ4	Ggt7	6.12827e-07	1.50082e-05	1.26185e-05	4.32526e-06	1.1285e-06		4.19976e-06	1.22896e-06	7.28128e-07	2.41656e-06	3.65542e-07	3.80182e-07	4.30124e-05	11	Glutathione hydrolase 7 OS=Rattus norvegicus OX=10116 GN=Ggt7 PE=1 SV=2
Prefrontal-cortex	Q5PQN0	Ncald	5.55369e-05	0.00010897	5.92719e-05	8.09142e-05	6.90024e-05	4.8847e-05	0.000103098	3.25033e-05	3.62422e-05	5.99472e-05	3.85396e-05	3.23265e-05	0.0007252	12	Neurocalcin-delta OS=Rattus norvegicus OX=10116 GN=Ncald PE=1 SV=3
Prefrontal-cortex	P43278	H1-0	6.80714e-07	9.48564e-06	1.96893e-05	5.29445e-06	5.31366e-06	2.40531e-05	1.85343e-05	4.50788e-06	5.29046e-06	2.95843e-05	2.3852e-05	1.08089e-05	0.000157095	12	Histone H1.0 OS=Rattus norvegicus OX=10116 GN=H1-0 PE=2 SV=2
Prefrontal-cortex	P13852	Prnp		2.38568e-05	3.84999e-05	9.70127e-06	1.42281e-05	1.96068e-05	4.15468e-05	9.25606e-06		2.71512e-05	2.32545e-05		0.000207101	9	Major prion protein OS=Rattus norvegicus OX=10116 GN=Prnp PE=1 SV=2
Prefrontal-cortex	Q9WVB1	Rab6a	0.000126921	0.000149037	0.000106686	4.33988e-05	0.000101196	0.000105044	6.43804e-05	9.73906e-05	6.60713e-05	8.94867e-05	0.000108441	0.000111239	0.00116929	12	Ras-related protein Rab-6A OS=Rattus norvegicus OX=10116 GN=Rab6a PE=1 SV=2
Prefrontal-cortex	P01830	Thy1	0.000166077	0.000980111	0.00078954	0.000126306	0.00034536	0.000268417	0.000811064	0.000190299	0.00017208	0.000519029	0.000373704	0.000226791	0.00496878	12	Thy-1 membrane glycoprotein OS=Rattus norvegicus OX=10116 GN=Thy1 PE=1 SV=1
Prefrontal-cortex	P54319	Plaa	1.47089e-06			1.30224e-06	2.44241e-06	2.91322e-06	2.57518e-06	5.03395e-06	4.43748e-06	3.22512e-06	2.65104e-06	4.93442e-05	7.53958e-05	10	Phospholipase A-2-activating protein OS=Rattus norvegicus OX=10116 GN=Plaa PE=1 SV=3
Prefrontal-cortex	P62963	Pfn1	0.000461894	0.000346583	0.000212164	0.000148923	0.000226342	0.000195688	0.000208385	0.000266674	0.000388213	0.00024029	0.00029079	0.000398535	0.00338448	12	Profilin-1 OS=Rattus norvegicus OX=10116 GN=Pfn1 PE=1 SV=2
Prefrontal-cortex	Q4KLH4	Pspc1	5.96926e-06	2.4389e-05	1.09749e-05	2.46723e-06	8.33618e-06	5.35005e-06	2.85813e-05	1.76985e-06	1.42848e-06	1.62488e-05	6.47457e-06	1.67959e-05	0.000128786	12	Paraspeckle component 1 OS=Rattus norvegicus OX=10116 GN=Pspc1 PE=1 SV=1
Prefrontal-cortex	Q32Q06	Ap1m1	6.31779e-05	9.10239e-06	1.54137e-05	2.13804e-05	1.77075e-05	5.98584e-05	1.09488e-05	2.19431e-05	1.30354e-05	2.03827e-05	1.9716e-05	1.92516e-05	0.000291918	12	AP-1 complex subunit mu-1 OS=Rattus norvegicus OX=10116 GN=Ap1m1 PE=1 SV=3
Prefrontal-cortex	O70441	Syn3	3.12373e-06		8.4852e-06	4.65068e-06	7.87916e-06	3.90866e-06	2.29047e-06	5.32484e-06	2.78746e-06	8.50338e-06	3.81635e-06		5.07699e-05	10	Synapsin-3 OS=Rattus norvegicus OX=10116 GN=Syn3 PE=1 SV=1
Prefrontal-cortex	Q9QYF3	Myo5a	6.99403e-05	0.000323096	0.000203598	6.75059e-05	0.000157252	0.000102892	0.000329079	0.000202348	0.000164002	0.000226173	0.000297753	0.000280524	0.00242416	12	Unconventional myosin-Va OS=Rattus norvegicus OX=10116 GN=Myo5a PE=1 SV=1
Prefrontal-cortex	P62628	Dynlrb1	2.75026e-05	2.79204e-05	4.65113e-05	2.46415e-05	4.13806e-05	3.39915e-05	5.26464e-05	3.69398e-05	3.67989e-05	4.5464e-05	5.34331e-05	3.8772e-05	0.000466002	12	Dynein light chain roadblock-type 1 OS=Rattus norvegicus OX=10116 GN=Dynlrb1 PE=1 SV=3
Prefrontal-cortex	Q9Z0V6	Prdx3	0.000182997	0.000120099	0.000217183	0.000140484	0.000160759	0.000186127	0.000126516	0.000250679	0.000224983	0.000172845	0.00022985	0.000264101	0.00227662	12	Thioredoxin-dependent peroxide reductase, mitochondrial OS=Rattus norvegicus OX=10116 GN=Prdx3 PE=1 SV=2
Prefrontal-cortex	Q63416	Itih3	2.59476e-05	4.03247e-05	6.89765e-05	7.57552e-06	2.59074e-05	1.38327e-05	6.88405e-05	8.27576e-05	9.03327e-05	6.566e-05	0.000345165	8.02777e-05	0.000915598	12	Inter-alpha-trypsin inhibitor heavy chain H3 OS=Rattus norvegicus OX=10116 GN=Itih3 PE=2 SV=1
Prefrontal-cortex	Q64560	Tpp2	4.39536e-05	2.41334e-05	5.84554e-05	4.13892e-05	5.92604e-05	6.27379e-05	7.08915e-05	4.94102e-05	0.00010439	3.8206e-05	4.6885e-05	3.39939e-05	0.000633707	12	Tripeptidyl-peptidase 2 OS=Rattus norvegicus OX=10116 GN=Tpp2 PE=2 SV=3
Prefrontal-cortex	P36876	Ppp2r2a	1.69199e-05	7.22265e-06	2.91646e-05	1.82728e-05	3.1773e-05	4.39059e-05	3.6823e-05	3.8026e-05	1.7097e-05	3.1125e-05	2.71368e-05	2.36496e-05	0.000321116	12	Serine/threonine-protein phosphatase 2A 55 kDa regulatory subunit B alpha isoform OS=Rattus norvegicus OX=10116 GN=Ppp2r2a PE=2 SV=1
Prefrontal-cortex	P62083	Rps7	7.35487e-05	7.7472e-05	9.7944e-05	9.82217e-05	6.14237e-05	0.000102694	0.00010133	7.3719e-05	7.41094e-05	8.7266e-05	0.000138212	6.00408e-05	0.00104598	12	40S ribosomal protein S7 OS=Rattus norvegicus OX=10116 GN=Rps7 PE=1 SV=1
Prefrontal-cortex	Q9JJ19	Slc9a3r1	1.01776e-05	1.00339e-05	1.27998e-05	1.21967e-05	1.0856e-05	1.22896e-05	7.71912e-06	1.46079e-05	9.66457e-06	1.45798e-05	1.47144e-05	1.57187e-05	0.000145358	12	Na(+)/H(+) exchange regulatory cofactor NHE-RF1 OS=Rattus norvegicus OX=10116 GN=Slc9a3r1 PE=1 SV=3
Prefrontal-cortex	Q5I0D1	Glod4	3.05586e-05	1.23158e-05	2.93142e-05	4.09952e-05	2.35228e-05	3.04816e-05	2.05958e-05	3.95273e-05	9.71651e-06	2.90036e-05	2.92918e-05	2.60348e-05	0.000321358	12	Glyoxalase domain-containing protein 4 OS=Rattus norvegicus OX=10116 GN=Glod4 PE=1 SV=1
Prefrontal-cortex	P17074	Rps19	4.63397e-05	5.91689e-05	7.37536e-05	3.0735e-05	3.76226e-05	5.66447e-05	7.28114e-05	4.95208e-05	3.54516e-05	4.29144e-05	6.79978e-05	6.31608e-05	0.000636121	12	40S ribosomal protein S19 OS=Rattus norvegicus OX=10116 GN=Rps19 PE=2 SV=3
Prefrontal-cortex	P97615	Txn2	1.77856e-05	8.57734e-06	1.71259e-05	1.15706e-05	1.58836e-05	1.95767e-05	1.12722e-05	2.018e-05	1.59873e-05	1.34587e-05	1.28986e-05	1.59263e-05	0.000180243	12	Thioredoxin, mitochondrial OS=Rattus norvegicus OX=10116 GN=Txn2 PE=2 SV=1
Prefrontal-cortex	P62856	Rps26	3.05228e-05	3.14829e-05	2.1823e-05	6.83867e-06	1.29328e-05	2.4578e-05	2.37207e-05	1.43071e-05	1.7566e-05	1.85829e-05	2.78154e-05	2.5206e-05	0.000255376	12	40S ribosomal protein S26 OS=Rattus norvegicus OX=10116 GN=Rps26 PE=3 SV=3
Prefrontal-cortex	Q925N3	Pex5l	2.64009e-06	2.38238e-06	3.61086e-06	5.59744e-06	1.66838e-06	5.1688e-06	7.79195e-05	9.98752e-05	1.09461e-05	4.19314e-06	3.87734e-06	6.67575e-06	0.000224555	12	PEX5-related protein OS=Rattus norvegicus OX=10116 GN=Pex5l PE=1 SV=1
Prefrontal-cortex	P19468	Gclc	6.6371e-06	4.54743e-06		2.21789e-06	2.99335e-06	1.41004e-06	1.23793e-06	8.88452e-06	6.62217e-06	3.581e-06	7.78009e-06	7.50526e-06	5.34168e-05	11	Glutamate--cysteine ligase catalytic subunit OS=Rattus norvegicus OX=10116 GN=Gclc PE=1 SV=2
Prefrontal-cortex	Q9Z339	Gsto1	0.000140633	0.000101008	0.000141927	0.000122452	0.000124949	0.00019459	0.000138026	0.000227727	8.87208e-05	0.000156329	0.000152393	0.00012307	0.00171182	12	Glutathione S-transferase omega-1 OS=Rattus norvegicus OX=10116 GN=Gsto1 PE=1 SV=2
Prefrontal-cortex	Q64057	Aldh7a1	3.719e-05	3.54774e-05	5.60588e-05	1.9452e-05	5.52163e-05	0.000104942	1.84876e-05	0.000217119	2.87624e-05	2.81444e-05	0.000130876	2.67257e-05	0.000758451	12	Alpha-aminoadipic semialdehyde dehydrogenase OS=Rattus norvegicus OX=10116 GN=Aldh7a1 PE=1 SV=2
Prefrontal-cortex	P19234	Ndufv2	5.17101e-06	1.83092e-05	6.73557e-06	5.75511e-06	7.4718e-06	8.05885e-06			2.66131e-06	1.88214e-05	6.45771e-06	4.41294e-06	8.38548e-05	10	NADH dehydrogenase [ubiquinone] flavoprotein 2, mitochondrial OS=Rattus norvegicus OX=10116 GN=Ndufv2 PE=1 SV=2
Prefrontal-cortex	Q498R7	Czib	5.9901e-06	1.21121e-06	6.84625e-06	9.76799e-06	1.04628e-05	9.95137e-06	5.55853e-06	1.48196e-05	5.61942e-06	3.67593e-06	7.56521e-06	4.49992e-06	8.59683e-05	12	CXXC motif containing zinc binding protein OS=Rattus norvegicus OX=10116 GN=Czib PE=2 SV=1
Prefrontal-cortex	P47728	Calb2	1.39861e-05	1.92204e-05	6.54668e-06	3.03372e-05	4.97283e-05	7.36719e-06	2.25302e-05	3.4896e-05	9.64486e-06	2.21397e-05	1.67833e-05	4.20221e-05	0.000275202	12	Calretinin OS=Rattus norvegicus OX=10116 GN=Calb2 PE=1 SV=1
Prefrontal-cortex	P62332	Arf6	1.35722e-05	2.44634e-05	1.4161e-05	1.28676e-05	5.93532e-06	3.8228e-06	1.57164e-05	6.73043e-06		1.54922e-05	1.41356e-05		0.000126897	10	ADP-ribosylation factor 6 OS=Rattus norvegicus OX=10116 GN=Arf6 PE=1 SV=2
Prefrontal-cortex	P62859	Rps28	4.66312e-05	3.51801e-05	3.98493e-05	2.0044e-05	2.54104e-05	3.63623e-05	3.9929e-05	3.20816e-05	2.62079e-05	4.73591e-05	5.41061e-05	4.6464e-05	0.000449625	12	40S ribosomal protein S28 OS=Rattus norvegicus OX=10116 GN=Rps28 PE=1 SV=1
Prefrontal-cortex	Q9Z0J8	Negr1		7.44113e-05	0.000119016	6.29266e-06	1.45811e-05	1.01945e-05	0.0001517		1.14148e-05	2.35539e-05	2.11005e-05	9.06153e-06	0.000441327	10	Neuronal growth regulator 1 OS=Rattus norvegicus OX=10116 GN=Negr1 PE=1 SV=1
Prefrontal-cortex	P10362	Scg2	2.14642e-06	1.083e-06	5.6292e-07	2.53644e-06		1.02589e-06	1.44788e-06	3.10016e-06	9.86124e-07	9.39828e-07	4.03052e-06	2.51422e-06	2.03734e-05	11	Secretogranin-2 OS=Rattus norvegicus OX=10116 GN=Scg2 PE=1 SV=1
Prefrontal-cortex	Q62940	Nedd4	3.77854e-06	1.18701e-05	2.39192e-06	4.65909e-05	1.05566e-05	2.06867e-06	5.39167e-06	6.85972e-05	7.01059e-06	4.34722e-06	6.97618e-07	1.35707e-06	0.000164658	12	E3 ubiquitin-protein ligase NEDD4 OS=Rattus norvegicus OX=10116 GN=Nedd4 PE=1 SV=1
Prefrontal-cortex	P13668	Stmn1	0.000191835	0.000123289	0.000189454	0.000111674		0.00022948	0.00017173	0.000235706	2.80075e-05	5.9611e-05	0.000118	0.000137522	0.00159631	11	Stathmin OS=Rattus norvegicus OX=10116 GN=Stmn1 PE=1 SV=2
Prefrontal-cortex	P29066	Arrb1	1.63701e-05	5.91945e-06	1.45997e-05	1.21809e-05	1.41281e-05	1.33107e-05	1.21538e-05	1.53021e-05	1.80987e-05	2.00763e-05	2.22028e-05	2.38544e-05	0.000188197	12	Beta-arrestin-1 OS=Rattus norvegicus OX=10116 GN=Arrb1 PE=1 SV=1
Prefrontal-cortex	Q64536	Pdk2	1.08844e-05	1.34592e-05	1.74054e-05	1.40283e-05	5.0714e-06	7.20902e-06	5.39852e-06	1.44064e-05	1.18319e-05	9.5823e-06	1.6517e-05	1.12524e-05	0.000137046	12	[Pyruvate dehydrogenase (acetyl-transferring)] kinase isozyme 2, mitochondrial OS=Rattus norvegicus OX=10116 GN=Pdk2 PE=1 SV=1
Prefrontal-cortex	D4A4T9	Chordc1	4.88603e-06	3.43441e-06	2.8459e-06	1.86297e-06	3.16685e-06	4.94054e-06	3.5404e-06	8.48032e-06	8.18949e-06	3.20042e-06	1.906e-06	3.93091e-06	5.03842e-05	12	Cysteine and histidine-rich domain-containing protein 1 OS=Rattus norvegicus OX=10116 GN=Chordc1 PE=3 SV=1
Prefrontal-cortex	D3ZAF6	Atp5mf	3.63225e-05		2.39596e-05	3.48548e-05	2.25788e-05	1.24569e-05	2.81067e-05			1.93327e-05	1.67385e-05		0.00019435	8	ATP synthase subunit f, mitochondrial OS=Rattus norvegicus OX=10116 GN=Atp5mf PE=1 SV=1
Prefrontal-cortex	P63324	Rps12	4.5731e-05	7.91454e-05	5.37531e-05	3.49158e-05	3.18204e-05	5.38556e-05	5.99577e-05	2.72582e-05	4.3614e-05	6.55222e-05	7.03487e-05	6.90083e-05	0.00063493	12	40S ribosomal protein S12 OS=Rattus norvegicus OX=10116 GN=Rps12 PE=1 SV=2
Prefrontal-cortex	P37996	Arl3	1.80873e-05	1.54062e-05	1.54456e-05	1.77538e-05	1.14825e-05	1.69725e-05	2.51914e-05	2.37938e-05	3.03253e-05	1.61188e-05	7.71801e-06	2.74046e-05	0.0002257	12	ADP-ribosylation factor-like protein 3 OS=Rattus norvegicus OX=10116 GN=Arl3 PE=1 SV=2
Prefrontal-cortex	P42676	Nln	6.92605e-06	3.86042e-06	8.40279e-06	7.53294e-06	2.85151e-06		3.48986e-06	4.3848e-06	1.05887e-06	2.66707e-06	4.43801e-06	2.5184e-06	4.81307e-05	11	Neurolysin, mitochondrial OS=Rattus norvegicus OX=10116 GN=Nln PE=1 SV=1
Prefrontal-cortex	P63041	Cplx1	3.99369e-05	2.52387e-05	6.90552e-05	4.35773e-05	5.78442e-05	8.804e-05	4.34835e-05	6.02409e-05	4.80351e-05	5.76899e-05	5.83239e-05	4.22201e-05	0.000633686	12	Complexin-1 OS=Rattus norvegicus OX=10116 GN=Cplx1 PE=1 SV=1
Prefrontal-cortex	P62275	Rps29	2.72504e-06	2.13466e-06		3.9721e-06	4.55855e-06	1.10297e-05	8.13904e-06			4.64421e-06	1.0681e-05		4.78844e-05	8	40S ribosomal protein S29 OS=Rattus norvegicus OX=10116 GN=Rps29 PE=1 SV=2
Prefrontal-cortex	Q6AYN4	Phyhipl			1.42184e-05	1.50487e-05	1.40955e-05	1.54672e-05		1.11514e-05		2.23566e-05	1.12118e-05	1.8688e-05	0.000122238	8	Phytanoyl-CoA hydroxylase-interacting protein-like OS=Rattus norvegicus OX=10116 GN=Phyhipl PE=1 SV=2
Prefrontal-cortex	P60905	Dnajc5	3.44176e-05	0.000111253	0.000138895	3.38411e-05	6.31734e-05	4.82787e-05	0.000119612	5.85426e-05	5.03503e-05	6.81264e-05	0.000101261	4.30412e-05	0.000870792	12	DnaJ homolog subfamily C member 5 OS=Rattus norvegicus OX=10116 GN=Dnajc5 PE=1 SV=1
Prefrontal-cortex	P28818	Rasgrf1	1.49162e-06	2.03804e-06	1.42964e-06	2.47109e-06	6.32696e-06	2.31923e-06	4.10752e-06	5.41576e-06	2.97967e-06	3.62017e-06	3.4321e-06	3.61564e-06	3.92474e-05	12	Ras-specific guanine nucleotide-releasing factor 1 OS=Rattus norvegicus OX=10116 GN=Rasgrf1 PE=1 SV=1
Prefrontal-cortex	Q6AYT3	Rtcb	4.41844e-05	3.72157e-05	2.87339e-05	2.89027e-05	3.09755e-05	4.01843e-05	5.36928e-05	5.56223e-05	3.60315e-05	4.46006e-05	5.16265e-05	4.29247e-05	0.000494695	12	RNA-splicing ligase RtcB homolog OS=Rattus norvegicus OX=10116 GN=Rtcb PE=2 SV=1
Prefrontal-cortex	Q7M767	Ube2v2	7.43853e-05	8.68123e-05	0.000131173	9.18049e-05	4.2823e-05	9.07927e-05	0.000118446	0.00017841	5.56298e-05	7.79982e-05	5.1253e-05	0.000129674	0.0011292	12	Ubiquitin-conjugating enzyme E2 variant 2 OS=Rattus norvegicus OX=10116 GN=Ube2v2 PE=1 SV=3
Prefrontal-cortex	P62271	Rps18	0.000105685	0.000125118	0.000101255	4.6187e-05	6.22638e-05	8.78787e-05	9.49288e-05	5.07874e-05	7.02716e-05	0.000103294	8.51174e-05	9.33361e-05	0.00102612	12	40S ribosomal protein S18 OS=Rattus norvegicus OX=10116 GN=Rps18 PE=1 SV=3
Prefrontal-cortex	Q8K4Y5	Lgi1	1.55438e-05	0.00016412	6.12562e-05	1.33041e-05	1.21648e-05	1.22816e-05	4.34796e-05	1.34443e-05		3.15642e-05	1.25193e-05		0.000379678	10	Leucine-rich glioma-inactivated protein 1 OS=Rattus norvegicus OX=10116 GN=Lgi1 PE=1 SV=1
Prefrontal-cortex	P24473	Gstk1			4.86647e-06	4.26361e-06	5.48227e-07	8.77226e-07	2.70677e-06	1.67863e-05	8.36247e-07	3.41359e-06	5.1384e-06	2.51723e-06	4.1954e-05	10	Glutathione S-transferase kappa 1 OS=Rattus norvegicus OX=10116 GN=Gstk1 PE=1 SV=3
Prefrontal-cortex	P31662	Slc6a17	1.47276e-05	0.000102589	7.80076e-05	1.70293e-05	4.1394e-05	2.18865e-05	9.96276e-05	3.39698e-05	2.67102e-05	4.73941e-05	5.30101e-05	2.32271e-05	0.000559573	12	Sodium-dependent neutral amino acid transporter SLC6A17 OS=Rattus norvegicus OX=10116 GN=Slc6a17 PE=1 SV=1
Prefrontal-cortex	O54924	Exoc8	1.46656e-05		1.5232e-05	8.81929e-06	4.21208e-06	6.29251e-06	4.2492e-06	8.84821e-06	2.85783e-06	5.11846e-06	6.8334e-06	4.53776e-06	8.16664e-05	11	Exocyst complex component 8 OS=Rattus norvegicus OX=10116 GN=Exoc8 PE=1 SV=1
Prefrontal-cortex	Q4VSI4	Usp7	6.03393e-06	3.60897e-06	2.97138e-05	3.00687e-05	4.8112e-05	4.01153e-05	3.56712e-06	7.72547e-06	3.83007e-06	1.01746e-05	3.56025e-05	4.75921e-06	0.000223312	12	Ubiquitin carboxyl-terminal hydrolase 7 OS=Rattus norvegicus OX=10116 GN=Usp7 PE=1 SV=1
Prefrontal-cortex	Q923S8	Pank4	1.24737e-06			6.51331e-07	7.91262e-07	2.05447e-05	5.90094e-07	2.49916e-06	6.8127e-06	2.87991e-06	1.30073e-06	4.50971e-06	4.1827e-05	10	4'-phosphopantetheine phosphatase OS=Rattus norvegicus OX=10116 GN=Pank4 PE=1 SV=1
Prefrontal-cortex	P97878	Exoc5				3.96345e-06	1.984e-06	1.18044e-06	2.68157e-06	3.02147e-06	7.51125e-07	1.51032e-06	8.55753e-07	2.11852e-06	1.80666e-05	9	Exocyst complex component 5 OS=Rattus norvegicus OX=10116 GN=Exoc5 PE=1 SV=1
Prefrontal-cortex	Q62915	Cask	0.000159539	0.000139841	7.17349e-05	4.71239e-05	3.92421e-05	6.67268e-05	4.67418e-05	6.74538e-05	0.000137013	5.48353e-05	0.000187613	0.00013205	0.00114991	12	Peripheral plasma membrane protein CASK OS=Rattus norvegicus OX=10116 GN=Cask PE=1 SV=1
Prefrontal-cortex	P82471	Gnaq		1.67144e-05	1.85661e-05	7.64907e-06	9.06914e-06	6.57279e-06	2.75041e-05	1.23424e-06	4.94649e-06	3.5993e-06	1.20635e-05	6.59992e-06	0.000114519	11	Guanine nucleotide-binding protein G(q) subunit alpha OS=Rattus norvegicus OX=10116 GN=Gnaq PE=2 SV=2
Prefrontal-cortex	Q6IRK9	Cpq	4.59119e-06			1.87552e-06		2.9515e-06				4.09702e-05	4.86092e-05	1.33955e-06	0.000100337	6	Carboxypeptidase Q OS=Rattus norvegicus OX=10116 GN=Cpq PE=1 SV=1
Prefrontal-cortex	P18298	Mat2a	1.0424e-05			5.19255e-06	1.21677e-05	1.1536e-05	1.47822e-05	2.2071e-05	1.33444e-05	1.04012e-05	1.18116e-05	1.62282e-05	0.000127959	10	S-adenosylmethionine synthase isoform type-2 OS=Rattus norvegicus OX=10116 GN=Mat2a PE=1 SV=1
Prefrontal-cortex	A0A0G2JV04	Gga3	2.29981e-05		4.05759e-06	4.54231e-06	3.82224e-06	3.74982e-06	4.42194e-06	6.5693e-06	6.61231e-06	4.61458e-06	5.59888e-06	8.52439e-06	7.55115e-05	11	ADP-ribosylation factor-binding protein GGA3 OS=Rattus norvegicus OX=10116 GN=Gga3 PE=1 SV=1
Prefrontal-cortex	Q63450	Camk1	5.50343e-05	3.6636e-05	1.42301e-05	1.61299e-05	1.82636e-05	2.09848e-05	1.61781e-05	1.6604e-05	7.94944e-06	1.69146e-05	1.60896e-05	2.04331e-05	0.000255448	12	Calcium/calmodulin-dependent protein kinase type 1 OS=Rattus norvegicus OX=10116 GN=Camk1 PE=1 SV=2
Prefrontal-cortex	O35458	Slc32a1	3.24743e-06	0.000139277	0.000186939	6.91523e-06	0.000102761	1.0544e-05	0.000102341	2.3641e-05	2.22814e-05	3.46883e-05	0.000277558	2.51158e-05	0.00093531	12	Vesicular inhibitory amino acid transporter OS=Rattus norvegicus OX=10116 GN=Slc32a1 PE=1 SV=1
Prefrontal-cortex	P06302	Ptma	3.72796e-06	2.14767e-06		6.12374e-06	1.50693e-05	1.29811e-05	2.85434e-06	5.37455e-06	7.23173e-06	4.35063e-06	9.07201e-06	3.98201e-06	7.2915e-05	11	Prothymosin alpha OS=Rattus norvegicus OX=10116 GN=Ptma PE=1 SV=2
Prefrontal-cortex	Q4KM65	Nudt21	4.61634e-06		2.56686e-06	1.41315e-06	7.10964e-06	3.44008e-06	4.12815e-06	3.76014e-06	1.47964e-06	3.89561e-06	7.47305e-06	5.73146e-06	4.56141e-05	11	Cleavage and polyadenylation specificity factor subunit 5 OS=Rattus norvegicus OX=10116 GN=Nudt21 PE=2 SV=1
Prefrontal-cortex	O54921	Exoc2	1.11603e-06	2.49679e-06	2.92211e-06			3.00248e-07	8.90966e-06	3.1036e-06			1.09409e-06	1.33737e-06	2.12799e-05	8	Exocyst complex component 2 OS=Rattus norvegicus OX=10116 GN=Exoc2 PE=1 SV=1
Prefrontal-cortex	A1L1I3	Numbl	4.25118e-06	2.04258e-05	9.84041e-06	4.92662e-06		2.47942e-06	6.20596e-06	6.47697e-06		4.26027e-06	1.2321e-05	4.59755e-06	7.57852e-05	10	Numb-like protein OS=Rattus norvegicus OX=10116 GN=Numbl PE=1 SV=1
Prefrontal-cortex	F1LYQ8	Farp1	0.00134543	3.93461e-06	2.93266e-06	0.00164884			3.09609e-06	9.64741e-08	1.48175e-06	2.06027e-06	4.97045e-06		0.00301284	9	FERM, ARHGEF and pleckstrin domain-containing protein 1 OS=Rattus norvegicus OX=10116 GN=Farp1 PE=1 SV=2
Prefrontal-cortex	B3DMA0	Tp53i11	6.59116e-07	1.61964e-05	5.20064e-06				9.66079e-06			4.34355e-06	3.10028e-06		3.91608e-05	6	Tumor protein p53-inducible protein 11 OS=Rattus norvegicus OX=10116 GN=Tp53i11 PE=1 SV=1
Prefrontal-cortex	P12785	Fasn	0.00020443	0.000106501	0.000144021	0.000429645	0.000335026	0.000237144	0.000135886	0.000362962	0.000127901	0.000385784	0.000126386	0.000362978	0.00295866	12	Fatty acid synthase OS=Rattus norvegicus OX=10116 GN=Fasn PE=1 SV=3
Prefrontal-cortex	P11598	Pdia3	0.00058164	0.000274013	0.000879819	0.000466305	0.000683857	0.000570469	0.0003615	0.000428619	0.000316495	0.000395657	0.000590224	0.000385092	0.00593369	12	Protein disulfide-isomerase A3 OS=Rattus norvegicus OX=10116 GN=Pdia3 PE=1 SV=2
Prefrontal-cortex	P04642	Ldha	0.0015949	0.00164354	0.00150689	0.00109521	0.00136151	0.00163539	0.00140472	0.0018483	0.00172422	0.00189743	0.00197519	0.00203452	0.0197218	12	L-lactate dehydrogenase A chain OS=Rattus norvegicus OX=10116 GN=Ldha PE=1 SV=1
Prefrontal-cortex	P55161	Nckap1	0.000258136	0.000250249	0.000342224	0.000190366	0.000187272	0.000219116	0.000266688	0.000272204	0.000186069	0.000304463	0.000322526	0.000273298	0.00307261	12	Nck-associated protein 1 OS=Rattus norvegicus OX=10116 GN=Nckap1 PE=2 SV=1
Prefrontal-cortex	P10719	Atp5f1b	0.000800035	0.00116611	0.00102915	0.000832357	0.00100616	0.000859891	0.000841462	0.000624124	0.000519781	0.00132908	0.000790288	0.000568382	0.0103668	12	ATP synthase subunit beta, mitochondrial OS=Rattus norvegicus OX=10116 GN=Atp5f1b PE=1 SV=2
Prefrontal-cortex	P63086	Mapk1	0.000273269	0.000205808	0.00024967	0.00019396	0.000243713	0.000293247	0.000246381	0.000390001	0.000257635	0.000287791	0.000416185	0.000313608	0.00337127	12	Mitogen-activated protein kinase 1 OS=Rattus norvegicus OX=10116 GN=Mapk1 PE=1 SV=3
Prefrontal-cortex	P38650	Dync1h1	0.00136852	0.00126497	0.00144966	0.000974022	0.00136833	0.00111604	0.00149823	0.00152102	0.00153666	0.00139311	0.00231705	0.00158811	0.0173957	12	Cytoplasmic dynein 1 heavy chain 1 OS=Rattus norvegicus OX=10116 GN=Dync1h1 PE=1 SV=1
Prefrontal-cortex	Q5XI83	Vps35l	2.096e-06	1.63574e-06	6.88458e-07	5.77865e-07	1.571e-07			7.50578e-07	1.83644e-06	2.80231e-06	2.65234e-06	2.75755e-06	1.59544e-05	10	VPS35 endosomal protein-sorting factor-like OS=Rattus norvegicus OX=10116 GN=Vps35l PE=2 SV=1
Prefrontal-cortex	P53678	Ap3m2	3.40042e-05	1.65158e-05	2.43378e-05	2.01203e-05	4.28021e-05	3.6461e-05	2.65837e-05	5.00822e-05	3.15239e-05	4.10557e-05	4.51568e-05	4.82626e-05	0.000416906	12	AP-3 complex subunit mu-2 OS=Rattus norvegicus OX=10116 GN=Ap3m2 PE=2 SV=1
Prefrontal-cortex	D4A631	Arfgef1	3.9134e-06	2.34567e-07		1.80561e-07	3.1361e-07	7.09561e-06	4.73137e-07	5.42602e-07	1.21188e-06	6.7175e-07	1.12628e-06	1.72943e-06	1.74928e-05	11	Brefeldin A-inhibited guanine nucleotide-exchange protein 1 OS=Rattus norvegicus OX=10116 GN=Arfgef1 PE=1 SV=1
Prefrontal-cortex	Q641Z6	Ehd1		1.3954e-06	2.30783e-05	2.07962e-06	1.78145e-05	1.65642e-06	4.6786e-05	3.61497e-05	4.92202e-07	1.73239e-05	2.54106e-05	4.09348e-06	0.00017628	11	EH domain-containing protein 1 OS=Rattus norvegicus OX=10116 GN=Ehd1 PE=1 SV=1
Prefrontal-cortex	P56571	ES1 protein homolog, mitochondrial OS=Rattus norvegicus OX=10116	0.000157479	0.000101688	0.000156824	0.000110199	0.000134273	0.000203497	0.000129569	0.000206706	0.000147492	0.000174672	0.000251297	0.000185209	0.0019589	12	ES1 protein homolog, mitochondrial OS=Rattus norvegicus OX=10116 PE=1 SV=2
Prefrontal-cortex	P52873	Pc	0.000165663	0.000113819	0.000184473	0.000132613	0.000123071	0.000122485	0.000103748	0.000153692	0.000112025	0.000104932	0.000141055	0.000110755	0.00156833	12	Pyruvate carboxylase, mitochondrial OS=Rattus norvegicus OX=10116 GN=Pc PE=1 SV=2
Prefrontal-cortex	P60892	Prps1	4.14401e-05	2.67068e-05	2.6038e-05	2.13345e-05	2.68574e-05	3.68547e-05	2.72704e-05	2.68484e-05	3.56134e-05	3.21934e-05	2.91849e-05	4.80735e-05	0.000378416	12	Ribose-phosphate pyrophosphokinase 1 OS=Rattus norvegicus OX=10116 GN=Prps1 PE=1 SV=2
Prefrontal-cortex	P56558	Ogt	0.000117881	4.39034e-05	6.798e-05	7.08947e-05	5.64737e-05	6.47047e-05	3.22172e-05	6.73236e-05	4.2811e-05	5.256e-05	2.57236e-05	5.39518e-05	0.000696425	12	UDP-N-acetylglucosamine--peptide N-acetylglucosaminyltransferase 110 kDa subunit OS=Rattus norvegicus OX=10116 GN=Ogt PE=1 SV=1
Prefrontal-cortex	Q8VI04	Asrgl1	0.000222688	0.000386645	0.000217387	0.000138812	0.00020408	0.00022419	0.000152634	0.000221311	0.000260547	0.000219782	0.000218923	0.000363376	0.00283037	12	Isoaspartyl peptidase/L-asparaginase OS=Rattus norvegicus OX=10116 GN=Asrgl1 PE=1 SV=1
Prefrontal-cortex	P41565	Idh3g	0.000243634	0.000195416	0.000220322	0.000161475	0.000145781	0.000196036	0.000114514	0.000215678	0.000172334	0.000192174	0.000266949	0.000190354	0.00231467	12	Isocitrate dehydrogenase [NAD] subunit gamma 1, mitochondrial OS=Rattus norvegicus OX=10116 GN=Idh3g PE=1 SV=2
Prefrontal-cortex	Q568Z9	Phyhip	0.00012944	0.000103148	0.000179931	0.000129219	0.000177591	0.000142141	0.000110724	0.000193897	0.00013782	0.000139681	0.000139993	0.000177489	0.00176107	12	Phytanoyl-CoA hydroxylase-interacting protein OS=Rattus norvegicus OX=10116 GN=Phyhip PE=2 SV=1
Prefrontal-cortex	Q66HA8	Hsph1	0.00021689	0.000134139	0.000236891	0.000164892	0.00022665	0.000238276	0.000182903	0.000292846	0.000270343	0.000219643	0.000233939	0.000258339	0.00267575	12	Heat shock protein 105 kDa OS=Rattus norvegicus OX=10116 GN=Hsph1 PE=1 SV=1
Prefrontal-cortex	P32851	Stx1a	0.000311245	0.000503745	0.000367985	0.000228693	0.000272284	0.000330325	0.000313909	0.000424249	0.000287693	0.000264567	0.000391009	0.000230199	0.0039259	12	Syntaxin-1A OS=Rattus norvegicus OX=10116 GN=Stx1a PE=1 SV=1
Prefrontal-cortex	Q2PQA9	Kif5b			5.96889e-06	9.22727e-06	1.03607e-05		8.42959e-06	1.9405e-05	1.20231e-05	1.25252e-05	1.15858e-05	1.68606e-05	0.000106386	9	Kinesin-1 heavy chain OS=Rattus norvegicus OX=10116 GN=Kif5b PE=1 SV=1
Prefrontal-cortex	Q5SGE0	Lrpprc	8.93945e-06	7.11089e-06	7.4927e-06	1.41893e-05	4.58246e-06	6.70503e-06	4.64529e-06	1.65903e-05	7.272e-06	6.91554e-06	2.43757e-05	4.42721e-06	0.000113246	12	Leucine-rich PPR motif-containing protein, mitochondrial OS=Rattus norvegicus OX=10116 GN=Lrpprc PE=1 SV=1
Prefrontal-cortex	P05369	Fdps	5.16979e-05	2.37351e-06	3.90535e-06	3.20059e-06	6.62571e-06	1.10557e-05	2.85079e-06	4.65339e-06	4.27354e-06	2.5325e-06	3.31173e-06	4.53784e-06	0.000101019	12	Farnesyl pyrophosphate synthase OS=Rattus norvegicus OX=10116 GN=Fdps PE=2 SV=2
Prefrontal-cortex	Q5GFD9	Impact	0.000135742	0.000107342	0.000108564	8.08412e-05	0.000140611	0.000146631	0.000122336	0.000102232	7.35118e-05	0.000136425	8.75565e-05	0.000128414	0.00137021	12	Protein IMPACT OS=Rattus norvegicus OX=10116 GN=Impact PE=1 SV=1
Prefrontal-cortex	P63039	Hspd1	0.0012325	0.000937958	0.00119407	0.00108322	0.000966856	0.00103794	0.000786843	0.00109826	0.00100591	0.00110697	0.00137091	0.0011981	0.0130195	12	60 kDa heat shock protein, mitochondrial OS=Rattus norvegicus OX=10116 GN=Hspd1 PE=1 SV=1
Prefrontal-cortex	P28023	Dctn1	0.000134735	0.000105748	0.000104991	6.61273e-05	9.69745e-05	8.20594e-05	0.000191394	0.000187209	0.000115652	0.000165781	0.000193407	0.000165366	0.00160944	12	Dynactin subunit 1 OS=Rattus norvegicus OX=10116 GN=Dctn1 PE=1 SV=2
Prefrontal-cortex	A0A0G2JTR4	Abr	4.01174e-05	2.00371e-05	3.98702e-05	3.28233e-05	3.98293e-05	2.82763e-05	3.40478e-05	4.77786e-05	3.06004e-05	3.7053e-05	3.2827e-05	3.56153e-05	0.000418876	12	Active breakpoint cluster region-related protein OS=Rattus norvegicus OX=10116 GN=Abr PE=1 SV=2
Prefrontal-cortex	P67874	Csnk2b	2.82153e-05	3.30234e-05	2.51981e-05	2.86941e-05	4.19349e-05	3.48284e-05	4.11554e-05	6.05451e-05	3.67422e-05	4.95079e-05	4.23342e-05	5.51384e-05	0.000477317	12	Casein kinase II subunit beta OS=Rattus norvegicus OX=10116 GN=Csnk2b PE=1 SV=1
Prefrontal-cortex	P53534	Pygb	0.000850969	0.000631677	0.000920405	0.000602394	0.000896933	0.000888291	0.000609764	0.000879754	0.000784676	0.000811506	0.000903315	0.000748479	0.00952816	12	Glycogen phosphorylase, brain form (Fragment) OS=Rattus norvegicus OX=10116 GN=Pygb PE=1 SV=3
Prefrontal-cortex	P62260	Ywhae	0.00208505	0.00142612	0.00226655	0.00152602	0.00195272	0.00235576	0.00174712	0.00210834	0.00151751	0.00212751	0.0021137	0.0019524	0.0231788	12	14-3-3 protein epsilon OS=Rattus norvegicus OX=10116 GN=Ywhae PE=1 SV=1
Prefrontal-cortex	Q6PCT3	Tpd52l2	2.40408e-05	3.654e-05	7.43522e-05	2.27262e-05	2.32223e-05	4.03164e-05	4.00557e-05	5.96178e-05	1.67795e-05	5.41468e-05	3.72379e-05	3.27959e-05	0.000461831	12	Tumor protein D54 OS=Rattus norvegicus OX=10116 GN=Tpd52l2 PE=1 SV=1
Prefrontal-cortex	B2GV54	Nceh1	3.70774e-06	5.61516e-05	1.36388e-05	6.28574e-06	1.32008e-05	2.15264e-05	3.19157e-05	1.32876e-06	8.98789e-07	8.11541e-06	1.31808e-05	2.27276e-06	0.000172223	12	Neutral cholesterol ester hydrolase 1 OS=Rattus norvegicus OX=10116 GN=Nceh1 PE=1 SV=1
Prefrontal-cortex	P38656	Ssb	1.32473e-05	1.60643e-05	6.91906e-06	8.08285e-06	8.0012e-06	1.56303e-05	1.30065e-05	1.15067e-05	1.17833e-05	1.80179e-05	1.40183e-05	2.42754e-05	0.000160553	12	Lupus La protein homolog OS=Rattus norvegicus OX=10116 GN=Ssb PE=1 SV=1
Prefrontal-cortex	P21533	Rpl6	7.85917e-05	9.49988e-05	5.95059e-05	3.76826e-05	5.07579e-05	9.58093e-05	4.99511e-05	3.75218e-05	7.78253e-05	7.71763e-05	9.82646e-05	7.73033e-05	0.000835389	12	60S ribosomal protein L6 OS=Rattus norvegicus OX=10116 GN=Rpl6 PE=1 SV=5
Prefrontal-cortex	Q02563	Sv2a	0.000119127	0.00044309	0.000353335	8.26094e-05	0.000170248	0.00013259	0.000288889	0.000174114	0.00011944	0.000230613	0.000211975	0.000117248	0.00244328	12	Synaptic vesicle glycoprotein 2A OS=Rattus norvegicus OX=10116 GN=Sv2a PE=1 SV=2
Prefrontal-cortex	Q9ER34	Aco2	0.0027595	0.00186017	0.00267316	0.00204728	0.00221404	0.00231484	0.00193607	0.00281102	0.00222905	0.00234155	0.00271021	0.00238493	0.0282818	12	Aconitate hydratase, mitochondrial OS=Rattus norvegicus OX=10116 GN=Aco2 PE=1 SV=2
Prefrontal-cortex	P07632	Sod1	0.000301476	0.000365745	0.000370306	0.000242374	0.000504866	0.000278641	0.000543704	0.000561967	0.000340739	0.000468349	0.00040941	0.000442779	0.00483035	12	Superoxide dismutase [Cu-Zn] OS=Rattus norvegicus OX=10116 GN=Sod1 PE=1 SV=2
Prefrontal-cortex	P41562	Idh1	4.29996e-05	1.82048e-05	4.98911e-05	4.03111e-05	4.73817e-05	7.6106e-05	3.37397e-05	4.91789e-05	2.76649e-05	5.00417e-05	4.12871e-05	3.72942e-05	0.000514101	12	Isocitrate dehydrogenase [NADP] cytoplasmic OS=Rattus norvegicus OX=10116 GN=Idh1 PE=1 SV=1
Prefrontal-cortex	B5DF89	Cul3	2.64434e-05	1.93779e-05	1.60988e-05	1.80859e-05	4.33874e-05	4.40147e-05	4.45392e-05	2.13093e-05	3.1922e-05	4.01437e-05	4.79447e-05	3.91284e-05	0.000392395	12	Cullin-3 OS=Rattus norvegicus OX=10116 GN=Cul3 PE=1 SV=2
Prefrontal-cortex	Q9JJP9	Ubqln1	6.74289e-06	3.04171e-06	1.82313e-05	2.15936e-05	2.56883e-05	2.69766e-05	1.47587e-05	3.26852e-05	7.39834e-06	2.27894e-05	2.54477e-05	6.38841e-06	0.000211742	12	Ubiquilin-1 OS=Rattus norvegicus OX=10116 GN=Ubqln1 PE=1 SV=1
Prefrontal-cortex	D3ZQD3	Ogdhl	4.90234e-06	4.02102e-06	4.19538e-05	1.21491e-05	9.49709e-06	2.58292e-05	3.17697e-05	4.2842e-05	1.44792e-05	8.35762e-05	0.00010089	1.43364e-05	0.000386246	12	2-oxoglutarate dehydrogenase-like, mitochondrial OS=Rattus norvegicus OX=10116 GN=Ogdhl PE=1 SV=2
Prefrontal-cortex	P09606	Glul	0.00162597	0.00186026	0.00151066	0.00113382	0.0019474	0.0017836	0.00164389	0.00166712	0.00184058	0.00168041	0.00209902	0.0022521	0.0210448	12	Glutamine synthetase OS=Rattus norvegicus OX=10116 GN=Glul PE=1 SV=3
Prefrontal-cortex	Q3MIE4	Vat1	3.59415e-05	2.99504e-05	3.20303e-05	1.60427e-05	3.2372e-05	2.5972e-05	4.06816e-05	6.38961e-05	3.00622e-05	4.79405e-05	5.02835e-05	7.36356e-05	0.000478808	12	Synaptic vesicle membrane protein VAT-1 homolog OS=Rattus norvegicus OX=10116 GN=Vat1 PE=1 SV=1
Prefrontal-cortex	O08618	Prpsap2	2.20552e-05	7.71078e-06	3.75125e-05	1.37942e-05	1.37619e-05	1.90219e-05	4.52927e-05	4.59959e-05	2.36386e-05	4.56318e-05	2.91311e-05	2.95809e-05	0.000333127	12	Phosphoribosyl pyrophosphate synthase-associated protein 2 OS=Rattus norvegicus OX=10116 GN=Prpsap2 PE=1 SV=1
Prefrontal-cortex	Q6RUV5	Rac1	0.000153301	0.000544555	0.000452507	9.97105e-05	0.000210615	0.000177397	0.000440739	0.000202316	0.000172686	0.00028653	0.000372669	0.000253609	0.00336664	12	Ras-related C3 botulinum toxin substrate 1 OS=Rattus norvegicus OX=10116 GN=Rac1 PE=1 SV=1
Prefrontal-cortex	O35764	Nptxr	9.12034e-05	5.33643e-05	2.79222e-05	3.5382e-05	7.42551e-05	3.68147e-05	3.46701e-05	1.31359e-05	1.36801e-05	2.08934e-05	4.35134e-05	1.92224e-05	0.000464057	12	Neuronal pentraxin receptor OS=Rattus norvegicus OX=10116 GN=Nptxr PE=1 SV=1
Prefrontal-cortex	P48721	Hspa9	0.000168451	0.000219863	0.000278686	0.00019546	0.000257937	0.000284109	0.000264025	0.000354112	0.000215642	0.000261467	0.00038128	0.000288098	0.00316913	12	Stress-70 protein, mitochondrial OS=Rattus norvegicus OX=10116 GN=Hspa9 PE=1 SV=3
Prefrontal-cortex	P51635	Akr1a1	0.000233798	7.38387e-05	0.000144393	0.000122024	0.000127813	0.000157866	0.000104242	0.000159884	9.48278e-05	0.000137379	0.000186129	0.000154284	0.00169648	12	Aldo-keto reductase family 1 member A1 OS=Rattus norvegicus OX=10116 GN=Akr1a1 PE=1 SV=2
Prefrontal-cortex	Q9WTV5	Psmd9	8.14499e-06		6.54057e-06	4.67351e-06	8.76254e-06	9.55389e-06	8.79345e-06	1.17172e-05	6.84459e-06	7.37346e-06	1.94818e-05	1.11438e-05	0.00010303	11	26S proteasome non-ATPase regulatory subunit 9 OS=Rattus norvegicus OX=10116 GN=Psmd9 PE=1 SV=1
Prefrontal-cortex	Q9R0I8	Pip4k2a				5.94094e-06	5.78815e-06	3.02645e-06	2.46624e-06	6.00813e-06	3.30428e-05	5.325e-06	5.70209e-06	2.46338e-05	9.19336e-05	9	Phosphatidylinositol 5-phosphate 4-kinase type-2 alpha OS=Rattus norvegicus OX=10116 GN=Pip4k2a PE=1 SV=1
Prefrontal-cortex	Q9EPH8	Pabpc1	4.15922e-05	7.10689e-05	8.54984e-05	5.04203e-05	6.87165e-05	9.08274e-05	8.3498e-05	9.06656e-05	7.7306e-05	0.000107211	0.000135004	0.00011384	0.00101565	12	Polyadenylate-binding protein 1 OS=Rattus norvegicus OX=10116 GN=Pabpc1 PE=1 SV=1
Prefrontal-cortex	P01026	C3	4.95155e-05	4.28046e-05	1.79334e-06	2.97993e-06		4.78579e-06	2.63287e-06	6.58029e-07			4.19358e-06	9.61241e-06	0.000118976	9	Complement C3 OS=Rattus norvegicus OX=10116 GN=C3 PE=1 SV=3
Prefrontal-cortex	Q9JLA3	Uggt1	8.11866e-06	5.05612e-06	4.24052e-06	3.31161e-06	1.64707e-06	3.98224e-06	5.26871e-06	8.29773e-07	1.12898e-06	1.10883e-05	2.75333e-06	5.24939e-07	4.79503e-05	12	UDP-glucose:glycoprotein glucosyltransferase 1 OS=Rattus norvegicus OX=10116 GN=Uggt1 PE=1 SV=2
Prefrontal-cortex	O35112	Alcam	5.51952e-06	8.53913e-05	7.91359e-05	1.09948e-05	4.76011e-06	6.63189e-06	4.35807e-05	3.20457e-06	2.33028e-06	2.55532e-05	1.30793e-05	5.53062e-06	0.000285712	12	CD166 antigen OS=Rattus norvegicus OX=10116 GN=Alcam PE=1 SV=1
Prefrontal-cortex	O35964	Sh3gl1	4.64503e-05	5.70448e-05	5.3783e-05	0.000213493	0.000133038	5.76608e-05	7.40161e-05	0.000212923	6.25719e-05	6.01075e-05	7.26752e-05	5.88204e-05	0.00110258	12	Endophilin-A2 OS=Rattus norvegicus OX=10116 GN=Sh3gl1 PE=1 SV=1
Prefrontal-cortex	O35179	Sh3gl2	0.000429363	0.000267206	0.000642724	0.000379156	0.000606394	0.000610251	0.000476922	0.000674192	0.00032424	0.000501898	0.000689526	0.000462506	0.00606438	12	Endophilin-A1 OS=Rattus norvegicus OX=10116 GN=Sh3gl2 PE=1 SV=2
Prefrontal-cortex	P12007	Ivd	3.82226e-05	1.55613e-05	3.72952e-05	2.56766e-05	2.04061e-05	1.99572e-05	3.8331e-05	5.56122e-05	1.28936e-05	3.07761e-05	3.527e-05	2.25293e-05	0.000352531	12	Isovaleryl-CoA dehydrogenase, mitochondrial OS=Rattus norvegicus OX=10116 GN=Ivd PE=1 SV=2
Prefrontal-cortex	P05708	Hk1	0.00049791	0.000556183	0.000756288	0.000599478	0.000481432	0.000694016	0.000331518	0.000716331	0.00050997	0.000767998	0.00045691	0.000757294	0.00712533	12	Hexokinase-1 OS=Rattus norvegicus OX=10116 GN=Hk1 PE=1 SV=4
Prefrontal-cortex	P50503	St13	8.31621e-05	4.74746e-05	7.39385e-05	5.72495e-05	7.31257e-05	0.000104171	6.52669e-05	0.000124082	8.67275e-05	9.35801e-05	0.000105732	0.000104983	0.00101949	12	Hsc70-interacting protein OS=Rattus norvegicus OX=10116 GN=St13 PE=1 SV=1
Prefrontal-cortex	P83953	Kpna1	1.07997e-05	1.14852e-05	5.70871e-06	4.75683e-06	1.05265e-05	1.36585e-05	8.89385e-07	1.26756e-05	7.63893e-06	1.12002e-05	1.44976e-05	1.49208e-05	0.000118758	12	Importin subunit alpha-5 OS=Rattus norvegicus OX=10116 GN=Kpna1 PE=1 SV=1
Prefrontal-cortex	Q5RKI0	Wdr1	0.000446705	0.000305982	0.000357658	0.000204331	0.000291093	0.000282407	0.000319263	0.000376964	0.000286067	0.000302958	0.000337083	0.000398938	0.00390945	12	WD repeat-containing protein 1 OS=Rattus norvegicus OX=10116 GN=Wdr1 PE=1 SV=3
Prefrontal-cortex	P04785	P4hb	7.43287e-05	5.68358e-05	6.88023e-05	7.41562e-05	4.35324e-05	8.64697e-05	5.29135e-05	8.34631e-05	3.69862e-05	5.94655e-05	0.000108239	8.28408e-05	0.000828033	12	Protein disulfide-isomerase OS=Rattus norvegicus OX=10116 GN=P4hb PE=1 SV=2
Prefrontal-cortex	B0BNF1	Septin8	3.81914e-06	3.38469e-05	3.83875e-05	6.00969e-06	1.52855e-05	1.9191e-05	5.29478e-05	3.07624e-05	4.17053e-05	3.60065e-05	4.21556e-05	3.42473e-05	0.000354365	12	Septin-8 OS=Rattus norvegicus OX=10116 GN=Septin8 PE=1 SV=1
Prefrontal-cortex	Q5U2Z3	Nap1l4	2.78189e-05	1.57783e-05	3.58627e-05	2.92491e-05	3.87263e-05	4.5018e-05	2.57907e-05	4.79843e-05	3.15189e-05	4.46234e-05	4.32513e-05	5.31346e-05	0.000438757	12	Nucleosome assembly protein 1-like 4 OS=Rattus norvegicus OX=10116 GN=Nap1l4 PE=1 SV=1
Prefrontal-cortex	O55096	Dpp3	1.97981e-05	6.51366e-06	1.21667e-05	1.77772e-05	1.56237e-05	1.57967e-05	9.28079e-06	2.03484e-05	2.37531e-05	2.57685e-05	2.27906e-05	2.95989e-05	0.000219216	12	Dipeptidyl peptidase 3 OS=Rattus norvegicus OX=10116 GN=Dpp3 PE=1 SV=2
Prefrontal-cortex	B5DFN2	Ahcyl1	0.000237233	0.000362347	0.000266304	0.000216894	0.000292295	0.0002675	0.000297342	0.000294631	0.000282968	0.000266573	0.000288449	0.000343416	0.00341595	12	S-adenosylhomocysteine hydrolase-like protein 1 OS=Rattus norvegicus OX=10116 GN=Ahcyl1 PE=1 SV=2
Prefrontal-cortex	P63004	Pafah1b1	0.000159474	0.000153777	0.000201387	0.000139095	0.000182176	0.000184523	0.000176141	0.000204167	0.000166603	0.000165869	0.000194901	0.000116014	0.00204413	12	Platelet-activating factor acetylhydrolase IB subunit alpha OS=Rattus norvegicus OX=10116 GN=Pafah1b1 PE=1 SV=2
Prefrontal-cortex	P84076	Hpca	3.55497e-05	3.64029e-05	0.000125612	8.19664e-05	7.93954e-05	7.15879e-05	8.19437e-05	5.24805e-05	2.03191e-05	6.76291e-05	5.3817e-05	7.14137e-06	0.000713846	12	Neuron-specific calcium-binding protein hippocalcin OS=Rattus norvegicus OX=10116 GN=Hpca PE=1 SV=2
Prefrontal-cortex	P97756	Camkk1	7.38533e-05	3.25953e-06	4.7791e-05	1.85815e-05	2.5533e-05	2.34488e-05	8.85763e-06	8.94668e-06	3.88654e-05	2.1274e-05	4.03892e-05	1.07376e-05	0.000321538	12	Calcium/calmodulin-dependent protein kinase kinase 1 OS=Rattus norvegicus OX=10116 GN=Camkk1 PE=1 SV=1
Prefrontal-cortex	P62882	Gnb5	7.41205e-05	7.9727e-05	0.000130723	8.27958e-05	5.80442e-05	7.21776e-05	6.12008e-05	6.04985e-05	4.10161e-05	5.33485e-05	6.02879e-05	3.99199e-05	0.00081386	12	Guanine nucleotide-binding protein subunit beta-5 OS=Rattus norvegicus OX=10116 GN=Gnb5 PE=2 SV=1
Prefrontal-cortex	P68511	Ywhah	0.000603835	0.000671714	0.000619325	0.000590579	0.000755678	0.000922612	0.000368791	0.000533588	0.000611079	0.000744007	0.000687776	0.000901383	0.00801037	12	14-3-3 protein eta OS=Rattus norvegicus OX=10116 GN=Ywhah PE=1 SV=2
Prefrontal-cortex	P30349	Lta4h	1.26714e-05	1.7401e-06	1.29555e-05	1.03116e-05	1.8604e-05	2.40991e-05	1.44976e-05	2.28167e-05	1.96143e-05	1.39033e-05	2.52045e-05	2.22985e-05	0.000198717	12	Leukotriene A-4 hydrolase OS=Rattus norvegicus OX=10116 GN=Lta4h PE=1 SV=3
Prefrontal-cortex	P62243	Rps8	5.54074e-05	7.53684e-05	9.06005e-05	4.92283e-05	6.60168e-05	8.30809e-05	0.00012084	6.92693e-05	9.42085e-05	0.000114057	0.000128159	0.000121915	0.00106815	12	40S ribosomal protein S8 OS=Rattus norvegicus OX=10116 GN=Rps8 PE=1 SV=2
Prefrontal-cortex	Q5XIT1	Mapre3	0.000212152	0.000134494	0.000143764	0.000115886	0.00015172	0.000162434	0.000117985	0.000166826	0.000105792	0.000125879	0.000146304	0.000110066	0.0016933	12	Microtubule-associated protein RP/EB family member 3 OS=Rattus norvegicus OX=10116 GN=Mapre3 PE=1 SV=1
Prefrontal-cortex	P28075	Psmb5	4.20972e-05	1.91413e-05	2.81141e-05	2.56862e-05	3.57886e-05	2.26112e-05	2.96284e-05	1.69432e-05	1.77477e-05	1.61368e-05	3.33612e-05	4.08009e-05	0.000328057	12	Proteasome subunit beta type-5 OS=Rattus norvegicus OX=10116 GN=Psmb5 PE=1 SV=3
Prefrontal-cortex	Q6P7S1	Asah1	9.05251e-06	6.30486e-06	3.24263e-06	3.90965e-06	5.08713e-06	7.2019e-06	2.15838e-05	7.50067e-06	2.99099e-05	3.61802e-05	1.00501e-05	2.43317e-05	0.000164355	12	Acid ceramidase OS=Rattus norvegicus OX=10116 GN=Asah1 PE=1 SV=1
Prefrontal-cortex	P09527	Rab7a	0.000110138	0.00018195	0.000146451	9.33184e-05	0.000136055	0.0001151	0.000193643	0.000148801	0.000130205	0.000169797	0.000131494	0.000155009	0.00171196	12	Ras-related protein Rab-7a OS=Rattus norvegicus OX=10116 GN=Rab7a PE=1 SV=2
Prefrontal-cortex	Q07266	Dbn1		1.9906e-05	3.41522e-05	1.41928e-05	2.13898e-05	3.18917e-05	2.69233e-05		1.97156e-05	2.10482e-05	1.97623e-05	1.9976e-05	0.000228958	10	Drebrin OS=Rattus norvegicus OX=10116 GN=Dbn1 PE=1 SV=3
Prefrontal-cortex	Q5XI73	Arhgdia	0.000293501	0.000210654	0.000315497	0.000243374	0.000322011	0.000354824	0.000305274	0.000416066	0.000314274	0.000350614	0.000327402	0.000367666	0.00382116	12	Rho GDP-dissociation inhibitor 1 OS=Rattus norvegicus OX=10116 GN=Arhgdia PE=1 SV=1
Prefrontal-cortex	Q9JJ31	Cul5	5.48584e-06	6.13177e-06	4.34455e-06	8.94128e-06	7.34959e-06	1.15263e-05	6.49461e-06	9.03758e-06	7.0011e-06	7.26257e-06	1.18751e-05	7.68464e-06	9.3135e-05	12	Cullin-5 OS=Rattus norvegicus OX=10116 GN=Cul5 PE=1 SV=3
Prefrontal-cortex	P85972	Vcl	6.86488e-05	4.45036e-05	6.12747e-06	2.38979e-05	2.493e-05	1.1411e-05	8.38866e-06	1.96318e-05	3.02801e-05	1.45383e-05	8.95616e-05	6.04593e-05	0.000402379	12	Vinculin OS=Rattus norvegicus OX=10116 GN=Vcl PE=1 SV=1
Prefrontal-cortex	P62762	Vsnl1	0.000857294	0.00105297	0.00101385	0.000687723	0.000787806	0.000701115	0.000856492	0.000614091	0.000489746	0.000797752	0.000760282	0.00055067	0.00916979	12	Visinin-like protein 1 OS=Rattus norvegicus OX=10116 GN=Vsnl1 PE=1 SV=2
Prefrontal-cortex	P38983	Rpsa	7.81454e-05	9.54798e-05	0.000137574	7.21143e-05	0.000104697	0.00014968	0.000159633	8.48473e-05	9.79449e-05	0.000134031	0.000156133	0.000137349	0.00140763	12	40S ribosomal protein SA OS=Rattus norvegicus OX=10116 GN=Rpsa PE=1 SV=3
Prefrontal-cortex	P11275	Camk2a	0.00166135	0.00286972	0.00240837	0.00222191	0.00145917	0.00116137	0.000945641	0.00118061	0.00110763	0.00115434	0.000188832	0.000655193	0.0170141	12	Calcium/calmodulin-dependent protein kinase type II subunit alpha OS=Rattus norvegicus OX=10116 GN=Camk2a PE=1 SV=1
Prefrontal-cortex	P07633	Pccb	6.38508e-06	2.57181e-06	4.17231e-06	9.5801e-06	3.2884e-06	3.03334e-06	2.12805e-06	5.73787e-06	2.44412e-06	3.5784e-06	8.94034e-06	4.05198e-06	5.59118e-05	12	Propionyl-CoA carboxylase beta chain, mitochondrial OS=Rattus norvegicus OX=10116 GN=Pccb PE=2 SV=1
Prefrontal-cortex	P24155	Thop1	3.40052e-05	2.01232e-05	4.79008e-05	6.62712e-05	2.82474e-05	8.11757e-05	4.68612e-05	4.62349e-05	5.02098e-05	4.57197e-05	3.77028e-05	4.95379e-05	0.00055399	12	Thimet oligopeptidase OS=Rattus norvegicus OX=10116 GN=Thop1 PE=1 SV=4
Prefrontal-cortex	Q4G061	Eif3b	8.1547e-05	3.69518e-05	7.01007e-06	6.94471e-06	9.1135e-06	1.11585e-05	1.62108e-05	1.96425e-05	7.77498e-06	1.49462e-05	2.65752e-05	4.13358e-05	0.000279211	12	Eukaryotic translation initiation factor 3 subunit B OS=Rattus norvegicus OX=10116 GN=Eif3b PE=1 SV=1
Prefrontal-cortex	P54690	Bcat1	8.11448e-05	3.8817e-05	5.74395e-05	5.61295e-05	9.38902e-05	0.000126912	8.18517e-05	0.000116876	9.72106e-05	0.000112217	0.000114185	0.000122357	0.00109903	12	Branched-chain-amino-acid aminotransferase, cytosolic OS=Rattus norvegicus OX=10116 GN=Bcat1 PE=1 SV=1
Prefrontal-cortex	P13676	Apeh	5.544e-06	2.1572e-06	4.05258e-06	4.13126e-06	3.03575e-06	3.02359e-06	4.20094e-06	4.04254e-06	6.79487e-06	7.4739e-06	4.12007e-06	5.08507e-06	5.36618e-05	12	Acylamino-acid-releasing enzyme OS=Rattus norvegicus OX=10116 GN=Apeh PE=1 SV=1
Prefrontal-cortex	P62749	Hpcal1	1.92641e-05	4.45634e-05	9.22915e-06	6.21793e-06	1.91826e-06	2.6769e-06	1.50047e-05	1.06352e-05		1.72175e-05	1.17354e-05	1.13834e-05	0.000149846	11	Hippocalcin-like protein 1 OS=Rattus norvegicus OX=10116 GN=Hpcal1 PE=1 SV=2
Prefrontal-cortex	P19627	Gnaz		8.95363e-05	7.80979e-05	1.32777e-05	1.44091e-05	1.02208e-05	5.22143e-05	2.27423e-06	2.42294e-06	3.40898e-05	2.29938e-05		0.000319537	10	Guanine nucleotide-binding protein G(z) subunit alpha OS=Rattus norvegicus OX=10116 GN=Gnaz PE=2 SV=3
Prefrontal-cortex	P62632	Eef1a2	0.000172136	0.000121872	0.000414517	0.000101445	0.000251035	0.000245342	0.000211314	0.000226687	0.000319557	0.000227142	0.000440028	0.000210544	0.00294162	12	Elongation factor 1-alpha 2 OS=Rattus norvegicus OX=10116 GN=Eef1a2 PE=1 SV=1
Prefrontal-cortex	Q09073	Slc25a5	4.50056e-05	0.000144613	0.000172218	5.18465e-05	4.05778e-05	1.86977e-05	3.65455e-05	5.91203e-06	4.81193e-07	6.26557e-05	2.42313e-05		0.000602785	11	ADP/ATP translocase 2 OS=Rattus norvegicus OX=10116 GN=Slc25a5 PE=1 SV=3
Prefrontal-cortex	Q7TP47	Syncrip	8.71259e-05	9.56036e-05	0.000100844	4.02056e-05	7.72401e-05	8.21074e-05	8.25314e-05	7.7486e-05	5.38382e-05	0.000104951	9.91933e-05	0.000108795	0.00100992	12	Heterogeneous nuclear ribonucleoprotein Q OS=Rattus norvegicus OX=10116 GN=Syncrip PE=2 SV=1
Prefrontal-cortex	Q62698	Dync1li2	2.38541e-05	1.95841e-05	2.00065e-05	1.8735e-05	2.937e-05	3.02773e-05	3.12471e-05	4.33357e-05	3.23942e-05	4.13555e-05	4.06719e-05	3.44083e-05	0.00036524	12	Cytoplasmic dynein 1 light intermediate chain 2 OS=Rattus norvegicus OX=10116 GN=Dync1li2 PE=1 SV=1
Prefrontal-cortex	Q99MS0	Sec14l2	3.79589e-05	1.25532e-05	3.3372e-05	3.0747e-05	3.88524e-05	3.98163e-05	2.56743e-05	1.65037e-05	1.56028e-05	2.96541e-05	2.56487e-05	3.2652e-05	0.000339035	12	SEC14-like protein 2 OS=Rattus norvegicus OX=10116 GN=Sec14l2 PE=1 SV=1
Prefrontal-cortex	Q66HL2	Cttn	5.98876e-05	6.09603e-05	8.85466e-05	4.11548e-05	5.73841e-05	8.15233e-05	5.513e-05	7.27184e-05	4.80776e-05	6.39465e-05	6.47296e-05	6.60066e-05	0.000760066	12	Src substrate cortactin OS=Rattus norvegicus OX=10116 GN=Cttn PE=1 SV=1
Prefrontal-cortex	Q63610	Tpm3	2.6595e-05	1.92847e-05	4.3285e-05	3.80858e-05	4.46572e-05	3.87375e-05	3.76586e-05	4.40275e-05	1.88663e-05	3.90038e-05	2.95827e-05	2.96375e-05	0.000409421	12	Tropomyosin alpha-3 chain OS=Rattus norvegicus OX=10116 GN=Tpm3 PE=1 SV=2
Prefrontal-cortex	Q6P502	Cct3	0.000198733	0.00028729	0.000234877	0.000204082	0.000244192	0.000302224	0.00023241	0.000276186	0.000203734	0.000254101	0.000373395	0.000330426	0.00314165	12	T-complex protein 1 subunit gamma OS=Rattus norvegicus OX=10116 GN=Cct3 PE=1 SV=1
Prefrontal-cortex	Q566R0	Them4	1.83562e-05	1.36771e-05	2.56116e-05	1.87957e-05	1.13336e-05	1.88095e-05	1.25602e-05	2.50116e-05	4.58096e-06	1.38263e-05	1.90087e-05	2.09544e-05	0.000202526	12	Acyl-coenzyme A thioesterase THEM4 OS=Rattus norvegicus OX=10116 GN=Them4 PE=2 SV=1
Prefrontal-cortex	B0BNE5	Esd	5.87778e-05	2.25228e-05	5.26972e-05	3.73399e-05	7.52862e-05	7.63e-05	5.07505e-05	8.40277e-05	6.57754e-05	3.50364e-05	5.46398e-05	7.17613e-05	0.000684915	12	S-formylglutathione hydrolase OS=Rattus norvegicus OX=10116 GN=Esd PE=2 SV=1
Prefrontal-cortex	Q9EPC6	Pfn2	0.000156186	0.000193972	0.00012834	0.000101883	0.00015846	0.000102739	0.000118069	0.000183967	0.000246479	0.000152649	0.000147073	0.000320612	0.00201043	12	Profilin-2 OS=Rattus norvegicus OX=10116 GN=Pfn2 PE=1 SV=3
Prefrontal-cortex	P18297	Spr	6.0038e-06	4.90302e-07	1.50409e-06	3.08361e-07	9.64899e-07	5.68031e-07	7.61426e-07	1.23358e-06	1.27305e-06	4.32244e-07	3.04585e-07	1.72744e-06	1.55718e-05	12	Sepiapterin reductase OS=Rattus norvegicus OX=10116 GN=Spr PE=1 SV=1
Prefrontal-cortex	A8WCF8	Tprg1l	2.17264e-05	1.90815e-05	2.80481e-05	1.41188e-05	3.113e-05	2.19008e-05	2.61082e-05	3.59528e-05	2.37306e-05	3.05901e-05	4.19256e-05	3.59744e-05	0.000330287	12	Tumor protein p63-regulated gene 1-like protein OS=Rattus norvegicus OX=10116 GN=Tprg1l PE=1 SV=1
Prefrontal-cortex	P01041	Cstb	6.34675e-05	4.21715e-05	5.18759e-05	4.07398e-05	8.32744e-05	7.47485e-05	3.4447e-05	4.17811e-05	9.30677e-05	5.89131e-05	6.91931e-05	7.12923e-05	0.000724972	12	Cystatin-B OS=Rattus norvegicus OX=10116 GN=Cstb PE=1 SV=1
Prefrontal-cortex	Q6AYT5	Armt1	8.60328e-06		4.7359e-06	6.91887e-06	6.02042e-06	1.04349e-05	2.07148e-06		2.90338e-06	2.27853e-06	9.99169e-07	1.89673e-06	4.68627e-05	10	Damage-control phosphatase ARMT1 OS=Rattus norvegicus OX=10116 GN=Armt1 PE=1 SV=1
Prefrontal-cortex	P31016	Dlg4	9.36531e-06	3.02733e-05	7.65823e-06	1.0224e-05	1.94531e-05	7.01947e-06	1.63505e-05	1.54712e-05	3.46791e-06	2.61814e-05	1.85946e-05	8.80576e-06	0.000172865	12	Disks large homolog 4 OS=Rattus norvegicus OX=10116 GN=Dlg4 PE=1 SV=1
Prefrontal-cortex	P69682	Necap1	0.00014722	0.000235124	0.000179864	6.95236e-05	9.38407e-05	0.000107459	0.000147809	0.000111532	0.000122401	0.000117963	0.000121915	0.000124124	0.00157878	12	Adaptin ear-binding coat-associated protein 1 OS=Rattus norvegicus OX=10116 GN=Necap1 PE=1 SV=1
Prefrontal-cortex	P21913	Sdhb	6.82884e-06	2.10332e-05	5.38327e-05	3.54631e-05	1.44095e-06	4.43845e-05	2.76676e-05			3.43335e-05	1.49035e-05		0.000239888	9	Succinate dehydrogenase [ubiquinone] iron-sulfur subunit, mitochondrial OS=Rattus norvegicus OX=10116 GN=Sdhb PE=2 SV=2
Prefrontal-cortex	P51583	Paics	6.25263e-06	3.73935e-06	1.29313e-05	1.19444e-05	1.14621e-05	2.03748e-05	1.80239e-05	2.52634e-05	1.13755e-05	1.94668e-05	8.64235e-06	1.12539e-05	0.00016073	12	Multifunctional protein ADE2 OS=Rattus norvegicus OX=10116 GN=Paics PE=1 SV=3
Prefrontal-cortex	P10824	Gnai1	2.19459e-05	5.04267e-05	5.67785e-05	1.49535e-05	2.66237e-05	2.36419e-05	3.57217e-05	1.40758e-05	2.03485e-05	3.23288e-05	4.20284e-05	2.02986e-05	0.000359172	12	Guanine nucleotide-binding protein G(i) subunit alpha-1 OS=Rattus norvegicus OX=10116 GN=Gnai1 PE=1 SV=3
Prefrontal-cortex	O55156	Clip2	9.99775e-06	8.601e-06	1.03178e-05	1.01653e-05	1.60476e-05	1.29813e-05	5.73563e-06	1.74436e-05	1.25465e-05	8.73218e-06	6.47649e-05	1.83211e-05	0.000195655	12	CAP-Gly domain-containing linker protein 2 OS=Rattus norvegicus OX=10116 GN=Clip2 PE=1 SV=1
Prefrontal-cortex	Q6AXT5	Rab21	2.48272e-05	3.65748e-05	9.22742e-06	4.74395e-06		8.54996e-06	8.38124e-06	9.86489e-06	4.01596e-05		1.10078e-05	2.8816e-05	0.000182153	10	Ras-related protein Rab-21 OS=Rattus norvegicus OX=10116 GN=Rab21 PE=2 SV=1
Prefrontal-cortex	F1LQ48	Hnrnpl	1.85272e-05	1.74138e-05	2.87698e-05	1.095e-05	1.52865e-05	3.03617e-05	3.74442e-05	1.26289e-05	1.85696e-05	2.04159e-05	2.45597e-05	3.38138e-05	0.000268741	12	Heterogeneous nuclear ribonucleoprotein L OS=Rattus norvegicus OX=10116 GN=Hnrnpl PE=1 SV=2
Prefrontal-cortex	Q505J8	Farsa		3.85279e-06	6.46677e-07	7.51468e-07	1.17965e-06	1.52632e-06		7.99299e-06		3.52152e-06	3.73951e-06		2.32109e-05	8	Phenylalanine--tRNA ligase alpha subunit OS=Rattus norvegicus OX=10116 GN=Farsa PE=1 SV=1
Prefrontal-cortex	P18265	Gsk3a	1.58266e-05	1.8467e-05	2.39432e-05	2.59645e-05	2.72694e-05	3.15438e-05	2.00247e-05	3.70977e-05	2.52766e-05	1.94907e-05	2.31161e-05	2.33389e-05	0.000291359	12	Glycogen synthase kinase-3 alpha OS=Rattus norvegicus OX=10116 GN=Gsk3a PE=1 SV=1
Prefrontal-cortex	Q920Q0	Palm	5.70681e-05	0.000200438	0.000110932	3.04346e-05	6.32553e-05	8.37513e-05	0.000130435	0.000119739	0.000160431	8.6202e-05	8.74445e-05	8.97998e-05	0.00121993	12	Paralemmin-1 OS=Rattus norvegicus OX=10116 GN=Palm PE=1 SV=1
Prefrontal-cortex	Q9Z244	Gmpr	2.0245e-05		3.51805e-06	3.59343e-06	7.98485e-06	3.93092e-06	6.36352e-06	7.5487e-06		9.42502e-06	8.02593e-06		7.06354e-05	9	GMP reductase 1 OS=Rattus norvegicus OX=10116 GN=Gmpr PE=2 SV=1
Prefrontal-cortex	P55053	Fabp5	0.000103992	6.56191e-05	6.91315e-05	5.05483e-05	9.86669e-05	8.3692e-05	8.40274e-05	0.000206708	0.000136107	0.000201476	0.000182312	0.0001523	0.00143458	12	Fatty acid-binding protein 5 OS=Rattus norvegicus OX=10116 GN=Fabp5 PE=1 SV=3
Prefrontal-cortex	B5DF91	Elavl1	7.77454e-06	1.9303e-05	1.55415e-05	6.34619e-06	4.43503e-06	1.41009e-05	3.01311e-05	1.10657e-05	8.50645e-06	1.91583e-05	2.17844e-05	3.20389e-05	0.000190186	12	ELAV-like protein 1 OS=Rattus norvegicus OX=10116 GN=Elavl1 PE=1 SV=1
Prefrontal-cortex	Q62639	Rheb	3.13003e-05	2.29301e-05	1.53274e-05	8.78305e-06	1.52426e-05	1.28527e-05	1.22565e-05	2.12984e-05	8.55465e-06	1.2252e-05	1.12994e-05	2.06486e-05	0.000192746	12	GTP-binding protein Rheb OS=Rattus norvegicus OX=10116 GN=Rheb PE=1 SV=1
Prefrontal-cortex	P13697	Me1	9.39173e-05	8.26593e-05	3.93485e-05	4.72146e-05	5.94156e-05	7.68534e-05	4.28874e-05	6.55145e-05	2.38981e-05	9.83491e-05	0.000130028	8.08612e-05	0.000840947	12	NADP-dependent malic enzyme OS=Rattus norvegicus OX=10116 GN=Me1 PE=1 SV=2
Prefrontal-cortex	Q68FX9	Sirt5	9.44012e-06	6.4003e-06	1.50647e-05	1.18734e-05	1.60519e-05	1.03865e-05	1.12637e-05	7.46683e-06	1.13456e-05	9.26287e-06	1.75474e-05	1.66373e-05	0.000142741	12	NAD-dependent protein deacylase sirtuin-5, mitochondrial OS=Rattus norvegicus OX=10116 GN=Sirt5 PE=2 SV=1
Prefrontal-cortex	Q63041	A1m	0.000154407	0.000158086	7.8617e-05	3.63387e-05	7.2278e-06	4.17955e-05	0.000148307	4.44834e-06	3.93368e-05	7.14968e-06	8.5944e-05	5.86535e-06	0.000767524	12	Alpha-1-macroglobulin OS=Rattus norvegicus OX=10116 GN=A1m PE=1 SV=1
Prefrontal-cortex	O08651	Phgdh	0.000153158	0.000114686	4.91426e-05	0.000113604	0.000153527	0.000173211	5.36229e-05	0.00011106	3.24457e-05	5.21971e-05	4.66974e-05	3.46693e-05	0.00108802	12	D-3-phosphoglycerate dehydrogenase OS=Rattus norvegicus OX=10116 GN=Phgdh PE=1 SV=3
Prefrontal-cortex	Q5QJC9	Bag5		5.64558e-07		1.14939e-06	1.18185e-07	1.16864e-07	1.38242e-06	1.37604e-06	1.73607e-06	2.14514e-06	1.81941e-06	2.67059e-06	1.30787e-05	10	BAG family molecular chaperone regulator 5 OS=Rattus norvegicus OX=10116 GN=Bag5 PE=1 SV=1
Prefrontal-cortex	Q6P9U8	Eif3h		2.12364e-06	1.35362e-06	1.99417e-06	2.07402e-06	1.46746e-06	3.19672e-06	2.61709e-06	3.3105e-06	4.63457e-06	1.06347e-05	4.12899e-06	3.75355e-05	11	Eukaryotic translation initiation factor 3 subunit H OS=Rattus norvegicus OX=10116 GN=Eif3h PE=1 SV=1
Prefrontal-cortex	P09951	Syn1	9.68822e-06	1.49843e-05	1.47588e-05	1.81588e-05			2.79202e-05	2.25976e-05	1.73025e-05	2.60263e-05	1.44555e-05	1.6381e-05	0.000182273	10	Synapsin-1 OS=Rattus norvegicus OX=10116 GN=Syn1 PE=1 SV=3
Prefrontal-cortex	P22062	Pcmt1	0.000166899	0.000108498	0.000188654	0.000139578	0.00018014	0.000159238	0.000162511	0.000196697	0.000151795	0.000215148	0.000199983	0.000155315	0.00202446	12	Protein-L-isoaspartate(D-aspartate) O-methyltransferase OS=Rattus norvegicus OX=10116 GN=Pcmt1 PE=1 SV=2
Prefrontal-cortex	P52555	Erp29	0.000577075	4.75513e-05	2.81324e-05	3.35276e-05	2.62029e-05	4.00835e-05	2.90591e-05	3.52435e-05	3.54167e-05	3.47721e-05	4.11166e-05	5.41694e-05	0.00098235	12	Endoplasmic reticulum resident protein 29 OS=Rattus norvegicus OX=10116 GN=Erp29 PE=1 SV=2
Prefrontal-cortex	P04762	Cat	6.43867e-06	5.27288e-06	1.74036e-05	4.61089e-06	1.17733e-06	7.14002e-06	6.78199e-06	3.47386e-06		4.05294e-06	7.61913e-06	1.26964e-05	7.66677e-05	11	Catalase OS=Rattus norvegicus OX=10116 GN=Cat PE=1 SV=3
Prefrontal-cortex	Q64620	Ppp6c	2.00459e-06			1.53146e-06	4.70325e-07	2.93517e-06			4.13817e-07	1.80073e-06	8.51729e-07	1.26071e-06	1.12685e-05	8	Serine/threonine-protein phosphatase 6 catalytic subunit OS=Rattus norvegicus OX=10116 GN=Ppp6c PE=2 SV=2
Prefrontal-cortex	P29411	Ak3	0.000102462	0.000111836	5.32667e-06	3.17615e-05	6.02156e-05	0.000169249	3.9918e-06	5.28962e-06		0.000136306	6.15845e-06	0.000146677	0.000779274	11	GTP:AMP phosphotransferase AK3, mitochondrial OS=Rattus norvegicus OX=10116 GN=Ak3 PE=2 SV=2
Prefrontal-cortex	Q5XII0	Epdr1	4.62434e-05	3.32509e-05	2.31582e-05	2.44701e-05	2.75324e-05	3.04997e-05	2.25001e-05	4.35971e-05	5.04519e-05	4.04698e-05	3.29655e-05	6.22765e-05	0.000437416	12	Mammalian ependymin-related protein 1 OS=Rattus norvegicus OX=10116 GN=Epdr1 PE=1 SV=1
Prefrontal-cortex	Q9Z0W7	Clic4	7.62821e-07			4.66768e-07	3.84896e-06	3.98209e-06		3.484e-07	4.93396e-06	2.10974e-06	8.13828e-07	1.49725e-06	1.87638e-05	9	Chloride intracellular channel protein 4 OS=Rattus norvegicus OX=10116 GN=Clic4 PE=1 SV=3
Prefrontal-cortex	Q01066	Pde1b	3.47762e-05	2.16698e-05	1.43754e-05	2.6163e-05	1.12052e-05	1.2427e-05	9.89758e-06	1.12995e-05	7.97388e-06	1.49841e-05	1.68557e-05	1.07674e-05	0.000192395	12	Calcium/calmodulin-dependent 3',5'-cyclic nucleotide phosphodiesterase 1B OS=Rattus norvegicus OX=10116 GN=Pde1b PE=1 SV=1
Prefrontal-cortex	P62853	Rps25	0.000670607	6.87347e-05	3.1292e-05	0.000346569	0.000457055	0.000575986	0.000413078	0.000370235	4.79895e-05	0.000324401	0.000305039	0.000637378	0.00424836	12	40S ribosomal protein S25 OS=Rattus norvegicus OX=10116 GN=Rps25 PE=2 SV=1
Prefrontal-cortex	P15178	Dars1	2.24352e-05	1.77749e-05	8.60633e-06	7.68465e-06	1.30402e-05	1.52461e-05	1.51849e-05	6.78152e-05	2.64122e-05	2.09823e-05	5.00742e-05	4.77151e-05	0.000312971	12	Aspartate--tRNA ligase, cytoplasmic OS=Rattus norvegicus OX=10116 GN=Dars1 PE=1 SV=1
Prefrontal-cortex	Q6AXQ0	Sae1	6.21945e-06	2.69254e-06	2.28049e-06	3.28234e-06	8.37229e-06	9.60212e-06	8.6777e-06	9.30641e-06	4.74589e-06	8.79659e-06	9.1429e-06	5.78869e-06	7.89074e-05	12	SUMO-activating enzyme subunit 1 OS=Rattus norvegicus OX=10116 GN=Sae1 PE=2 SV=1
Prefrontal-cortex	P47198	Rpl22	4.20611e-05	5.44169e-05	5.08901e-05	3.26578e-05	4.3575e-05	5.62837e-05	5.34253e-05	4.49175e-05	4.79091e-05	8.01428e-05	7.86484e-05	6.94761e-05	0.000654404	12	60S ribosomal protein L22 OS=Rattus norvegicus OX=10116 GN=Rpl22 PE=2 SV=2
Prefrontal-cortex	P34064	Psma5	6.58208e-05	4.68088e-05	5.40928e-05	4.22955e-05	5.50016e-05	6.37755e-05	4.79747e-05	7.07505e-05	5.24214e-05	7.92177e-05	7.14138e-05	6.86877e-05	0.000718261	12	Proteasome subunit alpha type-5 OS=Rattus norvegicus OX=10116 GN=Psma5 PE=1 SV=1
Prefrontal-cortex	P20059	Hpx	6.34178e-05	8.91882e-05	1.65777e-05	2.94991e-05	6.57974e-06	2.28101e-05	2.39822e-05	4.99068e-06	5.90848e-06	2.8182e-06	1.91099e-05	1.21262e-05	0.000297008	12	Hemopexin OS=Rattus norvegicus OX=10116 GN=Hpx PE=1 SV=3
Prefrontal-cortex	F1M0Z1	Trio	2.78944e-05	2.21868e-05	4.56341e-07	2.60243e-06	2.09331e-05	4.80257e-06	1.01005e-05	3.72193e-06	1.21849e-05	2.22253e-06	3.85217e-06	6.82908e-06	0.000117787	12	Triple functional domain protein OS=Rattus norvegicus OX=10116 GN=Trio PE=1 SV=4
Prefrontal-cortex	P36201	Crip2	1.50873e-05	8.01718e-06	1.91496e-05	1.69929e-05	1.09496e-05	1.91929e-05	3.21619e-05	3.20142e-05	1.13091e-05	1.61907e-05	1.6745e-05	1.26474e-05	0.000210458	12	Cysteine-rich protein 2 OS=Rattus norvegicus OX=10116 GN=Crip2 PE=2 SV=1
Prefrontal-cortex	P61589	Rhoa	7.76894e-05	0.000109156	0.000224804	0.000122185	0.000185944	0.000156086	0.000218713	0.000170849	0.000123223	0.00017307	0.000211808	0.000151428	0.00192496	12	Transforming protein RhoA OS=Rattus norvegicus OX=10116 GN=Rhoa PE=1 SV=1
Prefrontal-cortex	Q497B0	Nit2	4.84361e-06	3.56233e-06	1.58543e-06	4.65205e-06	4.41567e-06	5.4955e-06	3.03269e-06	4.19417e-05	5.98106e-05	6.40873e-05	7.21588e-06	3.20918e-05	0.000232735	12	Omega-amidase NIT2 OS=Rattus norvegicus OX=10116 GN=Nit2 PE=1 SV=1
Prefrontal-cortex	O70277	Trim3	2.21534e-06	3.55399e-06	3.74422e-06	1.89064e-06	6.46222e-07	2.17321e-06	2.83773e-06	2.68174e-06	2.30705e-06	2.32982e-06	4.01453e-06	5.54462e-06	3.39391e-05	12	Tripartite motif-containing protein 3 OS=Rattus norvegicus OX=10116 GN=Trim3 PE=1 SV=1
Prefrontal-cortex	P0C2X9	Aldh4a1			3.57231e-06	3.5733e-06	3.9482e-06	2.08018e-06	1.57716e-06	1.5198e-05	2.96772e-06	1.1158e-06	3.95005e-06	4.00597e-06	4.19887e-05	10	Delta-1-pyrroline-5-carboxylate dehydrogenase, mitochondrial OS=Rattus norvegicus OX=10116 GN=Aldh4a1 PE=1 SV=1
Prefrontal-cortex	P62483	Kcnab2		4.43818e-05	1.85807e-05	4.70904e-06	4.36843e-06	7.41044e-06	2.02779e-05	2.98499e-06	2.28026e-06	1.17284e-05	1.70268e-06	1.95506e-06	0.00012038	11	Voltage-gated potassium channel subunit beta-2 OS=Rattus norvegicus OX=10116 GN=Kcnab2 PE=1 SV=1
Prefrontal-cortex	P43138	Apex1	2.01235e-06	2.6047e-06			0.000219547	1.5131e-05	0.000195524	5.0796e-06	4.29837e-06	1.31903e-05	0.000248349	5.23728e-06	0.000710973	10	DNA-(apurinic or apyrimidinic site) endonuclease OS=Rattus norvegicus OX=10116 GN=Apex1 PE=1 SV=2
Prefrontal-cortex	P63326	Rps10	4.60715e-05	5.89927e-05	3.01478e-05	2.12388e-05	2.08613e-05	3.10024e-05	5.00882e-05	4.1037e-05	3.55215e-05	6.12427e-05	6.98867e-05	6.01767e-05	0.000526267	12	40S ribosomal protein S10 OS=Rattus norvegicus OX=10116 GN=Rps10 PE=2 SV=1
Prefrontal-cortex	P25113	Pgam1	0.000662938	0.000471218	0.000811353	0.000652842	0.000834974	0.00091485	0.000714932	0.00083045	0.000817481	0.000564226	0.00074333	0.000787018	0.00880561	12	Phosphoglycerate mutase 1 OS=Rattus norvegicus OX=10116 GN=Pgam1 PE=1 SV=4
Prefrontal-cortex	P47967	Lgals5	5.92717e-06	2.10954e-05	1.63255e-05	7.38981e-06		5.05047e-06	2.94355e-06			1.81143e-06	4.62788e-06		6.51713e-05	8	Galectin-5 OS=Rattus norvegicus OX=10116 GN=Lgals5 PE=1 SV=2
Prefrontal-cortex	Q03344	Atp5if1	4.24732e-06	2.14815e-06		8.60348e-06	6.6875e-06	1.44873e-05		5.7052e-06	2.06093e-06	6.01784e-06	7.74382e-06		5.77015e-05	9	ATPase inhibitor, mitochondrial OS=Rattus norvegicus OX=10116 GN=Atp5if1 PE=3 SV=2
Prefrontal-cortex	P35434	Atp5f1d	3.00084e-05	6.28202e-05	4.88905e-05	2.65312e-05	3.54896e-05	3.19504e-05	2.31835e-05	1.54048e-05	1.03229e-05	4.52087e-05	1.92173e-05	6.41184e-06	0.000355439	12	ATP synthase subunit delta, mitochondrial OS=Rattus norvegicus OX=10116 GN=Atp5f1d PE=1 SV=2
Prefrontal-cortex	P19103	Ppp1r1a	3.6995e-06	1.97588e-06		8.37792e-06	8.40864e-06	1.44846e-05		1.25518e-05	3.91811e-06	1.05495e-05	1.51523e-05	1.12641e-05	9.03824e-05	10	Protein phosphatase 1 regulatory subunit 1A OS=Rattus norvegicus OX=10116 GN=Ppp1r1a PE=1 SV=1
Prefrontal-cortex	O88767	Park7	0.000324602	0.000197667	0.000358942	0.000254862	0.000330219	0.000449309	0.000297885	0.000453654	0.000291008	0.000384589	0.000443841	0.000358172	0.00414475	12	Parkinson disease protein 7 homolog OS=Rattus norvegicus OX=10116 GN=Park7 PE=1 SV=1
Prefrontal-cortex	Q5XI22	Acat2	3.41203e-05	2.57078e-05	3.02385e-05	3.84607e-05	3.84887e-05	5.10107e-05	2.69527e-05	1.85186e-05	2.22979e-05	3.53933e-05	1.92872e-05	2.30728e-05	0.000363549	12	Acetyl-CoA acetyltransferase, cytosolic OS=Rattus norvegicus OX=10116 GN=Acat2 PE=1 SV=1
Prefrontal-cortex	Q68A21	Purb	0.000130265	0.000111339	9.17959e-05	6.22026e-05	9.11547e-05	0.000162537	4.63393e-05	6.85954e-05	5.88982e-05	6.72767e-05	7.94263e-05	0.000111383	0.00108121	12	Transcriptional activator protein Pur-beta OS=Rattus norvegicus OX=10116 GN=Purb PE=1 SV=3
Prefrontal-cortex	Q5FVC2	Arhgef2	1.66381e-05	3.56355e-05	2.4525e-05	2.21548e-05	1.52846e-05	2.79577e-06	1.52651e-05	8.28094e-06	5.08039e-06	1.23167e-05	2.14212e-05	9.53112e-06	0.000188929	12	Rho guanine nucleotide exchange factor 2 OS=Rattus norvegicus OX=10116 GN=Arhgef2 PE=1 SV=1
Prefrontal-cortex	P97710	Sirpa	1.27056e-05	0.0001214	0.000130437	2.88691e-05	3.16949e-05	4.1424e-05	0.000132698	1.5178e-05	1.42867e-05	5.01058e-05	3.23082e-05	1.93308e-05	0.000630438	12	Tyrosine-protein phosphatase non-receptor type substrate 1 OS=Rattus norvegicus OX=10116 GN=Sirpa PE=1 SV=1
Prefrontal-cortex	P27682	Scg5			1.25027e-06	5.75034e-06	4.04795e-06	3.09483e-06	3.92427e-06	1.26289e-05	4.89703e-06	1.21224e-05	1.05534e-05	6.7244e-06	6.49939e-05	10	Neuroendocrine protein 7B2 OS=Rattus norvegicus OX=10116 GN=Scg5 PE=1 SV=1
Prefrontal-cortex	P62912	Rpl32	8.61205e-06	1.44465e-05	3.02273e-05	1.02717e-05	2.2303e-05	3.19446e-05	3.54561e-05	1.67192e-05	1.88301e-05	2.48592e-05	4.61547e-05	2.0169e-05	0.000279993	12	60S ribosomal protein L32 OS=Rattus norvegicus OX=10116 GN=Rpl32 PE=1 SV=2
Prefrontal-cortex	Q811X6	Cryl1	3.71949e-06		4.80585e-06	2.56835e-06	3.02122e-06	5.04072e-06	4.35815e-06	1.11793e-05	7.51463e-06	4.52903e-06	6.66707e-06	1.37539e-05	6.71577e-05	11	Lambda-crystallin homolog OS=Rattus norvegicus OX=10116 GN=Cryl1 PE=1 SV=3
Prefrontal-cortex	P09034	Ass1	1.13333e-05	6.98856e-06	3.44904e-06	9.9773e-06	3.05531e-06	2.92948e-06	4.26782e-06	8.67441e-06	4.32796e-06	5.88643e-06	5.28403e-06	8.50542e-06	7.46791e-05	12	Argininosuccinate synthase OS=Rattus norvegicus OX=10116 GN=Ass1 PE=1 SV=1
Prefrontal-cortex	Q68FY0	Uqcrc1	2.8462e-05	6.5107e-05	0.000127338	8.5726e-05	5.03549e-05	2.8826e-05	8.51435e-06	1.26127e-05	1.29743e-05	6.217e-05	1.17883e-05	1.16237e-05	0.000505498	12	Cytochrome b-c1 complex subunit 1, mitochondrial OS=Rattus norvegicus OX=10116 GN=Uqcrc1 PE=1 SV=1
Prefrontal-cortex	P63322	Rala	1.31867e-05	4.14693e-05	4.09938e-05	1.39486e-05	2.85386e-05	2.32926e-05	3.81495e-05	2.76609e-05	3.16379e-05	4.00174e-05	3.04235e-05	2.55331e-05	0.000354852	12	Ras-related protein Ral-A OS=Rattus norvegicus OX=10116 GN=Rala PE=1 SV=1
Prefrontal-cortex	Q62745	Cd81		2.45007e-05	2.17617e-05	6.13866e-06		8.6186e-06	2.25769e-05	8.94161e-06		1.70477e-05	1.07186e-05		0.000120304	8	CD81 antigen OS=Rattus norvegicus OX=10116 GN=Cd81 PE=1 SV=1
Prefrontal-cortex	Q5XIE0	Anp32e	4.86965e-06	1.24067e-06	2.01033e-06			1.51906e-05		5.44675e-06	1.06582e-06	3.31476e-06	5.87158e-06	3.25554e-06	4.22657e-05	9	Acidic leucine-rich nuclear phosphoprotein 32 family member E OS=Rattus norvegicus OX=10116 GN=Anp32e PE=2 SV=1
Prefrontal-cortex	P62076	Timm13	2.07662e-05	1.2461e-05	3.53434e-05	3.24272e-05	2.72126e-05	4.52136e-05	3.61595e-05	6.36466e-05	3.85761e-05	4.35688e-05	4.98372e-05	5.42332e-05	0.000459446	12	Mitochondrial import inner membrane translocase subunit Tim13 OS=Rattus norvegicus OX=10116 GN=Timm13 PE=3 SV=1
Prefrontal-cortex	Q4KLF8	Arpc5	3.51599e-05	1.90059e-05		1.77296e-05	2.67686e-05	3.47823e-05	4.69878e-05	2.96684e-05	2.22788e-05	3.36794e-05	3.80399e-05	5.07363e-05	0.000354837	11	Actin-related protein 2/3 complex subunit 5 OS=Rattus norvegicus OX=10116 GN=Arpc5 PE=1 SV=3
Prefrontal-cortex	P61354	Rpl27	5.93018e-05	6.51035e-05	6.02338e-05	2.34942e-05	3.26477e-05	3.02536e-05	8.54146e-05	4.28808e-05	4.48885e-05	5.20642e-05	6.05272e-05	5.47539e-05	0.000611564	12	60S ribosomal protein L27 OS=Rattus norvegicus OX=10116 GN=Rpl27 PE=2 SV=2
Prefrontal-cortex	P12749	Rpl26	1.72425e-05	4.34189e-05	3.64102e-05	6.87579e-06	1.83036e-05	2.50538e-05	1.95135e-05	2.37363e-05	1.96971e-05	3.50139e-05	5.16233e-05	3.75167e-05	0.000334406	12	60S ribosomal protein L26 OS=Rattus norvegicus OX=10116 GN=Rpl26 PE=1 SV=1
Prefrontal-cortex	Q91V33	Khdrbs1	3.91251e-06	1.25004e-05	1.2715e-05	6.42286e-06	9.1099e-06	9.53793e-06	2.18772e-05	5.0595e-06	1.06215e-05	1.60011e-05	1.03483e-05	1.49377e-05	0.000133044	12	KH domain-containing, RNA-binding, signal transduction-associated protein 1 OS=Rattus norvegicus OX=10116 GN=Khdrbs1 PE=1 SV=1
Prefrontal-cortex	Q505J6	Slc25a18	1.92583e-05	1.99608e-05	1.50836e-05	2.45331e-05	4.45669e-06	3.33295e-06	2.03347e-06			1.09092e-05	2.34798e-06		0.000101916	9	Mitochondrial glutamate carrier 2 OS=Rattus norvegicus OX=10116 GN=Slc25a18 PE=2 SV=2
Prefrontal-cortex	P57113	Gstz1		7.31302e-07	1.87718e-06	3.26236e-06	1.32522e-05	2.68681e-05		1.70406e-05			1.61695e-05	1.09705e-05	9.01718e-05	8	Maleylacetoacetate isomerase OS=Rattus norvegicus OX=10116 GN=Gstz1 PE=1 SV=2
Prefrontal-cortex	O08679	Mark2		5.59755e-06	5.54443e-06	3.01127e-06	3.23798e-06	3.26212e-06	3.6425e-06			1.11022e-05	5.34663e-06		4.07446e-05	8	Serine/threonine-protein kinase MARK2 OS=Rattus norvegicus OX=10116 GN=Mark2 PE=1 SV=1
Prefrontal-cortex	P47860	Pfkp	0.000750402	0.000547098	0.000691306	0.000438505	0.000692155	0.000752435	0.000557426	0.000763817	0.000721577	0.000743149	0.000731528	0.000856495	0.00824589	12	ATP-dependent 6-phosphofructokinase, platelet type OS=Rattus norvegicus OX=10116 GN=Pfkp PE=1 SV=2
Prefrontal-cortex	O35274	Ppp1r9b	6.30297e-06	2.59349e-05	2.55672e-05	1.24591e-05	1.22959e-05	2.86507e-05	2.76457e-05	2.23982e-05	1.16563e-05	2.00269e-05	1.50815e-05	1.73919e-05	0.000225411	12	Neurabin-2 OS=Rattus norvegicus OX=10116 GN=Ppp1r9b PE=1 SV=1
Prefrontal-cortex	D4AAT7	Naxd	2.08936e-06		7.62804e-06	4.11381e-06	1.72391e-05	6.37269e-07	1.8216e-05	8.43896e-06	1.10343e-06	1.37926e-05	1.01254e-05	1.6414e-05	9.97979e-05	11	ATP-dependent (S)-NAD(P)H-hydrate dehydratase OS=Rattus norvegicus OX=10116 GN=Naxd PE=3 SV=1
Prefrontal-cortex	P48500	Tpi1	0.00248196	0.00183229	0.00162321	0.00161856	0.00197813	0.00206818	0.00177944	0.00232883	0.00243841	0.00224042	0.00204741	0.00260106	0.0250379	12	Triosephosphate isomerase OS=Rattus norvegicus OX=10116 GN=Tpi1 PE=1 SV=2
Prefrontal-cortex	Q68FW9	Cops3	8.74145e-06	9.61876e-06	6.79812e-06	9.60862e-06	1.36545e-05	1.25152e-05	1.21377e-05	1.65163e-05	4.25151e-06	1.55051e-05	1.36814e-05	1.48497e-05	0.000137878	12	COP9 signalosome complex subunit 3 OS=Rattus norvegicus OX=10116 GN=Cops3 PE=1 SV=1
Prefrontal-cortex	Q5U300	Uba1	0.000150807	0.000124274	0.000173105	0.000122522	0.000170594	0.000200455	0.000115005	0.000121419	0.000134645	0.000120776	0.000151954	0.000139698	0.00172525	12	Ubiquitin-like modifier-activating enzyme 1 OS=Rattus norvegicus OX=10116 GN=Uba1 PE=1 SV=1
Prefrontal-cortex	P61765-2	Stxbp1	7.20584e-06	2.4324e-05	8.63976e-06		8.73063e-06		1.56327e-05		1.45357e-05	1.22791e-05	1.92373e-05	1.23212e-05	0.000122906	9	Isoform 2 of Syntaxin-binding protein 1 OS=Rattus norvegicus OX=10116 GN=Stxbp1
Prefrontal-cortex	P97526	Nf1	3.5988e-06	1.90747e-05	1.47548e-06	1.60333e-06	1.23954e-05	2.44027e-05	2.06612e-06	2.52106e-06	1.64719e-05	1.81092e-05	2.01412e-05	2.32105e-06	0.000124181	12	Neurofibromin OS=Rattus norvegicus OX=10116 GN=Nf1 PE=1 SV=1
Prefrontal-cortex	P02650	Apoe	0.000154127	0.000146086	0.000181844	0.000135155	0.000185626	0.000187239	0.000247844	0.000474406	0.000317612	0.000228935	0.000413311	0.000381317	0.0030535	12	Apolipoprotein E OS=Rattus norvegicus OX=10116 GN=Apoe PE=1 SV=2
Prefrontal-cortex	Q63692	Cdc37	4.77819e-05	2.94104e-05	8.7069e-05	3.9188e-05	4.63209e-05	3.87033e-05	4.80433e-05	5.11974e-05	3.46257e-05	5.75911e-05	6.018e-05	5.40696e-05	0.000594181	12	Hsp90 co-chaperone Cdc37 OS=Rattus norvegicus OX=10116 GN=Cdc37 PE=1 SV=2
Prefrontal-cortex	P97546	Nptn	1.03939e-05	0.000133267	7.97319e-05	2.13225e-05	1.57048e-05	2.06125e-05	7.07745e-05	5.92252e-06	3.39192e-06	3.30466e-05	1.19403e-05	6.73053e-06	0.000412839	12	Neuroplastin OS=Rattus norvegicus OX=10116 GN=Nptn PE=1 SV=2
Prefrontal-cortex	P10536	Rab1b	1.05872e-05	3.85733e-05	4.21523e-05	1.73319e-05	2.70006e-05	2.16862e-05	3.9889e-05	3.62947e-05	3.24768e-05	2.50562e-05	2.56291e-05	2.99276e-05	0.000346605	12	Ras-related protein Rab-1B OS=Rattus norvegicus OX=10116 GN=Rab1b PE=1 SV=1
Prefrontal-cortex	Q5M821	Ppm1h	1.79873e-05	1.87498e-05	1.66039e-05	1.49671e-05	1.84274e-05	9.87092e-06	2.03912e-05	4.32434e-05	1.67802e-05	2.46512e-05	2.93097e-05	2.70853e-05	0.000258067	12	Protein phosphatase 1H OS=Rattus norvegicus OX=10116 GN=Ppm1h PE=1 SV=2
Prefrontal-cortex	Q9JLJ3	Aldh9a1	4.75472e-05	2.83305e-05	4.35488e-05	3.65632e-05	5.97048e-05	3.51027e-05	5.85086e-05	6.36492e-05	4.41235e-05	3.2493e-05	5.62975e-05	4.44554e-05	0.000550325	12	4-trimethylaminobutyraldehyde dehydrogenase OS=Rattus norvegicus OX=10116 GN=Aldh9a1 PE=1 SV=1
Prefrontal-cortex	P11442	Cltc	0.00847078	0.00623618	0.00795156	0.00541779	0.00736393	0.00760773	0.0061094	0.00836685	0.00847447	0.00750321	0.00769475	0.00939016	0.0905868	12	Clathrin heavy chain 1 OS=Rattus norvegicus OX=10116 GN=Cltc PE=1 SV=3
Prefrontal-cortex	Q6PCU2	Atp6v1e1	0.000425716	0.000382748	0.000569319	0.000239124	0.000389747	0.000302359	0.00056055	0.000428025	0.000286738	0.00046766	0.000439925	0.000410613	0.00490253	12	V-type proton ATPase subunit E 1 OS=Rattus norvegicus OX=10116 GN=Atp6v1e1 PE=1 SV=1
Prefrontal-cortex	Q924N5	Acsbg1	1.86403e-05	2.55166e-05	4.35398e-05	2.44201e-05	5.42042e-05	3.53281e-05	5.61462e-05	6.55836e-05	3.32555e-05	5.21137e-05	6.21057e-05	3.16475e-05	0.000502501	12	Long-chain-fatty-acid--CoA ligase ACSBG1 OS=Rattus norvegicus OX=10116 GN=Acsbg1 PE=1 SV=1
Prefrontal-cortex	Q5FVI6	Atp6v1c1	0.000421048	0.000497203	0.000436982	0.000221912	0.000412476	0.000431447	0.000557153	0.000416721	0.000452396	0.000498153	0.000462819	0.00050535	0.00531366	12	V-type proton ATPase subunit C 1 OS=Rattus norvegicus OX=10116 GN=Atp6v1c1 PE=1 SV=1
Prefrontal-cortex	Q68FR6	Eef1g	0.000230309	0.000205529	0.000154052	0.000110543	0.000198887	0.000233645	0.00016016	0.000247387	0.000197079	0.000242883	0.000272043	0.00028174	0.00253426	12	Elongation factor 1-gamma OS=Rattus norvegicus OX=10116 GN=Eef1g PE=2 SV=3
Prefrontal-cortex	P20651	Ppp3cb	0.000147973	9.7015e-05	0.000138841	0.000106164	0.000140686	0.000144913	0.000136548	0.000185224	0.000136754	0.000160763	0.000132497	0.000173504	0.00170088	12	Serine/threonine-protein phosphatase 2B catalytic subunit beta isoform OS=Rattus norvegicus OX=10116 GN=Ppp3cb PE=1 SV=1
Prefrontal-cortex	Q4FZT9	Psmd2	7.12554e-05	5.82865e-05	8.87191e-05	6.47526e-05	7.79963e-05	6.67471e-05	8.48688e-05	9.1134e-05	9.46619e-05	0.000129176	0.000144976	8.73578e-05	0.00105993	12	26S proteasome non-ATPase regulatory subunit 2 OS=Rattus norvegicus OX=10116 GN=Psmd2 PE=1 SV=1
Prefrontal-cortex	F1LSG8	Vps50	9.04705e-06		7.45813e-06	1.35301e-06	7.83455e-07	5.77732e-07	9.94015e-07		9.00359e-07	1.55995e-06	7.34184e-06		3.00155e-05	9	Syndetin OS=Rattus norvegicus OX=10116 GN=Vps50 PE=1 SV=1
Prefrontal-cortex	Q6PEC4	Skp1	0.000117498	0.000125455	0.000116493	6.68741e-05	7.73123e-05	0.000118041	0.00010894	0.000100598	0.00011287	0.00013318	0.000122371	0.000117627	0.00131726	12	S-phase kinase-associated protein 1 OS=Rattus norvegicus OX=10116 GN=Skp1 PE=1 SV=3
Prefrontal-cortex	P19527	Nefl	5.61593e-05	0.000223372	0.000131241	2.0797e-05	0.000186495	0.000158057	0.000179489	0.000150275	0.000201803	0.000234654	0.000129272	0.000209059	0.00188067	12	Neurofilament light polypeptide OS=Rattus norvegicus OX=10116 GN=Nefl PE=1 SV=3
Prefrontal-cortex	Q66HD0	Hsp90b1	1.08194e-05	7.34255e-06	2.61873e-05	2.83143e-05	2.45248e-05	5.43902e-05	1.54904e-05	2.58509e-05	5.94366e-06	2.35349e-05	3.43582e-05	1.20091e-05	0.000268766	12	Endoplasmin OS=Rattus norvegicus OX=10116 GN=Hsp90b1 PE=1 SV=2
Prefrontal-cortex	P46844	Blvra	2.75899e-05	9.30137e-06	3.92683e-05	1.434e-05	2.64226e-05	1.60332e-05	8.17555e-05	7.37003e-05	3.64991e-05	4.9917e-05	2.89454e-05	6.34184e-05	0.000467191	12	Biliverdin reductase A OS=Rattus norvegicus OX=10116 GN=Blvra PE=1 SV=1
Prefrontal-cortex	Q6AYE2	Sh3glb1	7.07819e-06		2.0463e-06	2.05828e-06		9.22912e-07	2.50978e-06	4.3183e-06			4.71824e-06		2.3652e-05	7	Endophilin-B1 OS=Rattus norvegicus OX=10116 GN=Sh3glb1 PE=2 SV=1
Prefrontal-cortex	Q9WTT6	Gda	0.000885866	0.000559157	0.000933005	0.000638908	0.000774905	0.00100244	0.000826201	0.000835117	0.000626303	0.00101308	0.000790726	0.000810715	0.00969642	12	Guanine deaminase OS=Rattus norvegicus OX=10116 GN=Gda PE=1 SV=1
Prefrontal-cortex	Q9Z0W5	Pacsin1	0.000658169	0.000434509	0.000828419	0.000592171	0.000688901	0.000786982	0.000704208	0.000819688	0.000666532	0.000673365	0.000643802	0.000659098	0.00815584	12	Protein kinase C and casein kinase substrate in neurons protein 1 OS=Rattus norvegicus OX=10116 GN=Pacsin1 PE=1 SV=1
Prefrontal-cortex	P50137	Tkt	0.000386124	0.000262836	0.000449916	0.00029293	0.000426705	0.000466961	0.000296306	0.000427877	0.000396963	0.000398915	0.000430433	0.000504436	0.0047404	12	Transketolase OS=Rattus norvegicus OX=10116 GN=Tkt PE=1 SV=1
Prefrontal-cortex	D3ZQG6	Trim2	6.81588e-05	7.88435e-05	7.31286e-05	1.91021e-05	4.54327e-05	3.5038e-05	7.55167e-05	5.89469e-05	3.42761e-05	0.000102674	0.00012822	5.58748e-05	0.000775213	12	Tripartite motif-containing protein 2 OS=Rattus norvegicus OX=10116 GN=Trim2 PE=1 SV=2
Prefrontal-cortex	Q02253	Aldh6a1	8.78412e-05	5.70799e-05	7.52493e-05	9.3375e-05	6.68102e-05	9.22486e-05	6.97933e-05	9.47546e-05	6.15649e-05	8.0603e-05	0.000103321	9.27022e-05	0.000975344	12	Methylmalonate-semialdehyde dehydrogenase [acylating], mitochondrial OS=Rattus norvegicus OX=10116 GN=Aldh6a1 PE=1 SV=1
Prefrontal-cortex	P39069	Ak1	0.000120457	5.9716e-05	0.0001257	0.000254529	0.000165832	0.000144015	0.000131858	0.000340761	0.000124847	0.00014246	0.000127047	0.000128852	0.00186607	12	Adenylate kinase isoenzyme 1 OS=Rattus norvegicus OX=10116 GN=Ak1 PE=1 SV=3
Prefrontal-cortex	Q99JE4	Rasgrf2	4.22012e-06	7.61092e-06	9.36738e-06	3.63662e-06	7.03973e-07	1.25585e-06	1.55163e-06	2.06472e-06	1.9143e-06	2.6239e-06	1.27862e-06	1.51388e-06	3.77419e-05	12	Ras-specific guanine nucleotide-releasing factor 2 OS=Rattus norvegicus OX=10116 GN=Rasgrf2 PE=1 SV=1
Prefrontal-cortex	D3ZQL7	Tppp	0.000310389	0.000269309	0.000306214	0.000155417	0.000264012	0.000320683	0.000266569	0.000206504	0.000312152	0.000215884	0.000327908	0.000308448	0.00326349	12	Tubulin polymerization-promoting protein OS=Rattus norvegicus OX=10116 GN=Tppp PE=1 SV=1
Prefrontal-cortex	B5DFC8	Eif3c	1.0909e-05	1.03984e-05	1.33796e-06	1.09244e-06	1.41603e-06	3.12663e-06	1.03819e-05	1.37903e-05	9.23398e-06	1.03349e-05	1.96651e-05	1.80786e-05	0.000109765	12	Eukaryotic translation initiation factor 3 subunit C OS=Rattus norvegicus OX=10116 GN=Eif3c PE=1 SV=1
Prefrontal-cortex	Q68FX0	Idh3B	0.000527123	0.000395049	0.000645354	0.00037136	0.000392835	0.000451074	0.000348632	0.000561021	0.000341797	0.000432014	0.00056324	0.000413369	0.00544287	12	Isocitrate dehydrogenase [NAD] subunit beta, mitochondrial OS=Rattus norvegicus OX=10116 GN=Idh3B PE=2 SV=1
Prefrontal-cortex	P48768	Slc8a2	1.7519e-05	0.000126623	7.52774e-05	5.90146e-06	6.43799e-06	4.1882e-06	3.03146e-05	2.17072e-06	7.90524e-06	1.66165e-05	5.63336e-06	3.2759e-06	0.000301863	12	Sodium/calcium exchanger 2 OS=Rattus norvegicus OX=10116 GN=Slc8a2 PE=1 SV=1
Prefrontal-cortex	Q64303	Pak2			5.00512e-06		2.80654e-06	1.75368e-06	3.14361e-06	6.08064e-06		3.39068e-06	8.54721e-06		3.07275e-05	7	Serine/threonine-protein kinase PAK 2 OS=Rattus norvegicus OX=10116 GN=Pak2 PE=1 SV=1
Prefrontal-cortex	Q641Y5	Atg7	4.70084e-06	1.57884e-06	1.14214e-06	4.74993e-05		0.000156932	1.90161e-06	1.59105e-06	3.04869e-06		1.8383e-06	3.58909e-06	0.000223822	10	Ubiquitin-like modifier-activating enzyme ATG7 OS=Rattus norvegicus OX=10116 GN=Atg7 PE=2 SV=1
Prefrontal-cortex	Q63347	Psmc2	5.01467e-05	1.38327e-05	5.17094e-05	3.13839e-05	6.66277e-05	4.59214e-05	4.13541e-05	7.53885e-05	2.82043e-05	6.03419e-05	6.34658e-05	4.68641e-05	0.00057524	12	26S proteasome regulatory subunit 7 OS=Rattus norvegicus OX=10116 GN=Psmc2 PE=1 SV=3
Prefrontal-cortex	Q5BKC9	Ngef	2.5837e-05	9.5002e-05	3.86938e-05	1.81839e-05	2.26533e-05	2.88612e-05	3.35286e-05	2.28803e-05	2.15615e-05	2.93177e-05	1.57318e-05	2.06305e-05	0.000372882	12	Ephexin-1 OS=Rattus norvegicus OX=10116 GN=Ngef PE=1 SV=2
Prefrontal-cortex	Q8VHK2	Caskin1	3.97546e-06	4.42335e-05	6.46829e-06	7.61008e-06	3.92941e-06	1.37458e-05	8.82837e-06	2.37381e-06	2.12618e-05	3.88498e-06	2.89011e-06	1.04982e-05	0.0001297	12	Caskin-1 OS=Rattus norvegicus OX=10116 GN=Caskin1 PE=1 SV=1
Prefrontal-cortex	P62919	Rpl8	4.02887e-05	6.29817e-05	3.81592e-05	2.36955e-05	4.08415e-05	4.92752e-05	8.34203e-05	3.69344e-05	4.08767e-05	5.6703e-05	9.35657e-05	6.66816e-05	0.000633424	12	60S ribosomal protein L8 OS=Rattus norvegicus OX=10116 GN=Rpl8 PE=2 SV=2
Prefrontal-cortex	P04636	Mdh2	0.00378417	0.00330387	0.00323392	0.0026952	0.00274491	0.00328895	0.00245408	0.0037228	0.00318801	0.0035514	0.00369898	0.00398033	0.0396466	12	Malate dehydrogenase, mitochondrial OS=Rattus norvegicus OX=10116 GN=Mdh2 PE=1 SV=2
Prefrontal-cortex	Q6J4I0	Ppp1r1b	1.16535e-06	4.17727e-06		2.30426e-06	5.79888e-06	7.97435e-06	1.41009e-06	4.77276e-06	2.47652e-06	5.6311e-06	4.79255e-06	3.68836e-06	4.41915e-05	11	Protein phosphatase 1 regulatory subunit 1B OS=Rattus norvegicus OX=10116 GN=Ppp1r1b PE=1 SV=1
Prefrontal-cortex	Q9Z1P2	Actn1	0.00015877	0.000510753	0.000538175	0.000444907	0.000148145	0.000236871	0.000265677	0.000323019	0.000106388	0.000233524	0.000185482	0.000136262	0.00328797	12	Alpha-actinin-1 OS=Rattus norvegicus OX=10116 GN=Actn1 PE=1 SV=1
Prefrontal-cortex	D3ZHV2	Macf1	8.84449e-06	4.88121e-05	9.76405e-06	4.32549e-06	6.72074e-06	1.01738e-05	2.44034e-05	3.92258e-06	1.51149e-05	2.38108e-05	2.77567e-05	2.33341e-05	0.000206983	12	Microtubule-actin cross-linking factor 1 OS=Rattus norvegicus OX=10116 GN=Macf1 PE=1 SV=1
Prefrontal-cortex	Q924S5	Lonp1	3.09452e-05	1.22853e-05	2.53467e-05	2.73149e-05	9.79627e-06	1.84843e-05	1.77886e-05	4.00163e-05	1.29516e-05	1.53139e-05	4.49303e-05	1.3789e-05	0.000268962	12	Lon protease homolog, mitochondrial OS=Rattus norvegicus OX=10116 GN=Lonp1 PE=2 SV=1
Prefrontal-cortex	P12711	Adh5	5.91591e-05	5.72102e-05	6.96614e-05	5.29799e-05	7.72489e-05	9.71494e-05	6.18338e-05	9.00907e-05	5.31357e-05	8.32269e-05	6.96487e-05	8.70315e-05	0.000858376	12	Alcohol dehydrogenase class-3 OS=Rattus norvegicus OX=10116 GN=Adh5 PE=1 SV=2
Prefrontal-cortex	P97834	Gps1	1.79621e-05	7.99282e-06	7.79646e-06	9.01868e-06	5.97463e-06	9.09228e-06	4.44773e-06	9.82137e-06	1.01536e-05	5.98882e-06	1.20914e-05	1.51007e-05	0.000115441	12	COP9 signalosome complex subunit 1 OS=Rattus norvegicus OX=10116 GN=Gps1 PE=1 SV=1
Prefrontal-cortex	Q60587	Hadhb	2.34917e-05	3.63001e-05	4.15914e-05	2.15855e-05	5.89099e-06	1.59125e-05	1.31686e-05	8.29607e-06	1.19177e-05	1.71755e-05	3.85056e-05	1.9675e-05	0.000253511	12	Trifunctional enzyme subunit beta, mitochondrial OS=Rattus norvegicus OX=10116 GN=Hadhb PE=1 SV=1
Prefrontal-cortex	P15865	H1-4	2.44874e-05		0.000104987	4.83864e-05	5.79277e-05		0.000104448	3.22678e-05	5.65213e-05	0.000114287	8.28142e-05	6.91673e-05	0.000695294	10	Histone H1.4 OS=Rattus norvegicus OX=10116 GN=H1-4 PE=1 SV=3
Prefrontal-cortex	P24587	Akap5	3.7683e-05	3.71784e-05	5.90548e-05	3.12099e-05	3.50409e-05	3.89974e-05	5.79725e-05	4.53448e-05	2.96964e-05	5.7787e-05	5.1094e-05	3.12665e-05	0.000512326	12	A-kinase anchor protein 5 OS=Rattus norvegicus OX=10116 GN=Akap5 PE=1 SV=2
Prefrontal-cortex	Q4FZY0	Efhd2	0.000177559	0.000107789	0.000130866	0.000102019	0.000160078	0.00015332	0.000174729	0.000548275	0.000182795	0.000845861	0.000234392	0.00025554	0.00307322	12	EF-hand domain-containing protein D2 OS=Rattus norvegicus OX=10116 GN=Efhd2 PE=1 SV=1
Prefrontal-cortex	Q6PEC0	Nudt2	7.87917e-06	1.13088e-05	2.82448e-06	5.58946e-06	7.0166e-06	5.80242e-06	6.23348e-06	1.61753e-05	1.09461e-05	6.44785e-06	3.21311e-06	9.51842e-06	9.29553e-05	12	Bis(5'-nucleosyl)-tetraphosphatase [asymmetrical] OS=Rattus norvegicus OX=10116 GN=Nudt2 PE=2 SV=3
Prefrontal-cortex	B1H267	Snx5	5.87606e-06	1.34491e-05	4.35128e-05	3.5143e-06	2.08514e-06	1.6434e-06	5.81332e-06	5.83593e-06	1.56777e-05	6.28589e-06	5.73639e-05	5.56548e-06	0.000166623	12	Sorting nexin-5 OS=Rattus norvegicus OX=10116 GN=Snx5 PE=1 SV=1
Prefrontal-cortex	Q9JHU0	Dpysl5	0.000383804	0.000290229	0.00032966	0.000227864	0.000298345	0.000380894	0.000279474	0.000273492	0.000186663	0.000302951	0.000284926	0.000307646	0.00354595	12	Dihydropyrimidinase-related protein 5 OS=Rattus norvegicus OX=10116 GN=Dpysl5 PE=1 SV=1
Prefrontal-cortex	Q04462	Vars1	8.86579e-06	1.9429e-06	4.62152e-06	5.37862e-06	8.32526e-06	1.37925e-05	1.02543e-05	4.65076e-05	1.64375e-05	1.32324e-05	2.96682e-05	1.5598e-05	0.000174625	12	Valine--tRNA ligase OS=Rattus norvegicus OX=10116 GN=Vars1 PE=2 SV=2
Prefrontal-cortex	P13221	Got1	0.00126967	0.000961947	0.000928156	0.000615848	0.000607961	0.00101225	0.000764283	0.00104885	0.00143604	0.000943222	0.000813648	0.00147047	0.0118723	12	Aspartate aminotransferase, cytoplasmic OS=Rattus norvegicus OX=10116 GN=Got1 PE=1 SV=3
Prefrontal-cortex	Q5XHZ0	Trap1	1.68302e-05	1.22945e-05	1.21049e-05	1.81641e-05	1.32613e-05	1.37218e-05	8.87546e-06	4.02177e-05	5.18356e-06	7.83908e-06	2.59614e-05	1.02681e-05	0.000184722	12	Heat shock protein 75 kDa, mitochondrial OS=Rattus norvegicus OX=10116 GN=Trap1 PE=1 SV=1
Prefrontal-cortex	Q641X8	Eif3e	2.67127e-06	2.48277e-06	4.57085e-06	3.41746e-06	5.61403e-06	2.0066e-06	3.11917e-06	9.59748e-06		6.88623e-06	1.36563e-05	3.23905e-06	5.72612e-05	11	Eukaryotic translation initiation factor 3 subunit E OS=Rattus norvegicus OX=10116 GN=Eif3e PE=2 SV=1
Prefrontal-cortex	Q9WU82	Ctnnb1	9.05453e-07	6.59126e-05	2.20249e-05	3.87883e-06	3.75903e-06	2.41481e-06	2.12803e-05	1.35763e-06		1.00606e-05	9.75638e-07	1.34385e-06	0.000133914	11	Catenin beta-1 OS=Rattus norvegicus OX=10116 GN=Ctnnb1 PE=1 SV=1
Prefrontal-cortex	F1M5N7	Kif21b	4.10641e-06	5.24367e-06	1.69842e-05	7.7897e-06	1.43205e-05	9.22393e-06	8.72732e-06			1.20044e-05	1.84296e-05	1.22731e-05	0.000109103	10	Kinesin-like protein KIF21B OS=Rattus norvegicus OX=10116 GN=Kif21b PE=1 SV=2
Prefrontal-cortex	G3V9R8	Hnrnpc	1.44288e-05	2.89354e-05	9.54251e-06	8.31677e-06	1.10214e-05	1.66047e-05	5.15624e-05	1.10944e-05	1.98933e-05	4.70333e-05	3.52738e-05	3.06883e-05	0.000284395	12	Heterogeneous nuclear ribonucleoprotein C OS=Rattus norvegicus OX=10116 GN=Hnrnpc PE=1 SV=2
Prefrontal-cortex	P03994	Hapln1	0.000127435	0.000134991	5.50172e-05	1.09686e-05	3.45117e-05	4.61891e-05	2.15146e-05	2.02522e-05	2.39926e-05	3.34671e-05	2.87721e-05	2.97938e-05	0.000566905	12	Hyaluronan and proteoglycan link protein 1 OS=Rattus norvegicus OX=10116 GN=Hapln1 PE=1 SV=2
Prefrontal-cortex	Q66H80	Arcn1	9.10726e-06	4.39298e-06	4.02937e-06	3.80362e-06	5.65339e-05	5.34992e-06	6.33939e-06	1.12057e-05	8.90784e-06	9.24375e-06	8.33498e-06	1.49614e-05	0.00014221	12	Coatomer subunit delta OS=Rattus norvegicus OX=10116 GN=Arcn1 PE=2 SV=1
Prefrontal-cortex	Q05546	Tnr	2.35553e-05	7.68084e-05	8.29791e-05	4.46792e-05	3.68116e-05	3.88835e-05	4.10943e-05	4.81234e-05	4.13341e-05	5.80092e-05	3.01282e-05	5.18019e-05	0.000574208	12	Tenascin-R OS=Rattus norvegicus OX=10116 GN=Tnr PE=1 SV=1
Prefrontal-cortex	P05426	Rpl7	0.000119834	0.000140711	9.20359e-05	4.51659e-05	6.78651e-05	0.000100726	0.000145439	8.73321e-05	9.01887e-05	0.00010481	0.000138026	0.000162526	0.00129466	12	60S ribosomal protein L7 OS=Rattus norvegicus OX=10116 GN=Rpl7 PE=1 SV=2
Prefrontal-cortex	P50398	Gdi1	0.0015009	0.00112928	0.00123287	0.00107782	0.00146502	0.00146061	0.0012708	0.00160141	0.00126894	0.00171346	0.0016463	0.00179012	0.0171575	12	Rab GDP dissociation inhibitor alpha OS=Rattus norvegicus OX=10116 GN=Gdi1 PE=1 SV=1
Prefrontal-cortex	Q5XFX0	Tagln2	2.36241e-06	1.63793e-06	1.39102e-06	1.80386e-06	2.91836e-07	1.11911e-06	2.6491e-06	7.61395e-06	1.96905e-06	3.44002e-06	1.38167e-05	5.41165e-07	3.86362e-05	12	Transgelin-2 OS=Rattus norvegicus OX=10116 GN=Tagln2 PE=1 SV=1
Prefrontal-cortex	Q5M7U6	Actr2	0.000364764	0.000327992	0.000372984	0.000297565	0.000293444	0.000347573	0.000329262	0.000347868	0.000339876	0.000347951	0.000355361	0.000390163	0.0041148	12	Actin-related protein 2 OS=Rattus norvegicus OX=10116 GN=Actr2 PE=2 SV=1
Prefrontal-cortex	Q9WUS0	Ak4	2.33147e-05	1.64875e-05	3.14058e-05	2.08423e-05	1.88498e-05	2.11624e-05	1.16839e-05	3.33519e-05	1.32818e-05	2.83386e-05	3.79333e-05	2.92199e-05	0.000285872	12	Adenylate kinase 4, mitochondrial OS=Rattus norvegicus OX=10116 GN=Ak4 PE=2 SV=1
Prefrontal-cortex	O35264	Pafah1b2	0.000171498	0.000143	0.000111481	0.00012668	8.88894e-05	8.86592e-05	0.000103121	0.000148819	0.000110722	0.000147736	0.000158403	0.000195136	0.00159415	12	Platelet-activating factor acetylhydrolase IB subunit alpha2 OS=Rattus norvegicus OX=10116 GN=Pafah1b2 PE=1 SV=1
Prefrontal-cortex	P12839	Nefm	1.68079e-06	3.92871e-05	1.96371e-05	5.17375e-06	6.50128e-05	4.47708e-05	6.44228e-05	2.36912e-05	7.0762e-05	7.56398e-05	1.59905e-05	4.5136e-05	0.000471205	12	Neurofilament medium polypeptide OS=Rattus norvegicus OX=10116 GN=Nefm PE=1 SV=4
Prefrontal-cortex	P27867	Sord	4.477e-06			2.90502e-06	3.90659e-06		3.05624e-06	6.29585e-06			3.93562e-06	3.38259e-06	2.79589e-05	7	Sorbitol dehydrogenase OS=Rattus norvegicus OX=10116 GN=Sord PE=1 SV=4
Prefrontal-cortex	Q6P799	Sars1	9.89714e-05	3.79732e-05	3.86898e-05	3.575e-05	4.09641e-05	6.43843e-05	4.55976e-05	6.88275e-05	6.38024e-05	6.47699e-05	5.28769e-05	7.512e-05	0.000687727	12	Serine--tRNA ligase, cytoplasmic OS=Rattus norvegicus OX=10116 GN=Sars1 PE=1 SV=3
Prefrontal-cortex	A0JPM9	Eif3j	1.86543e-05	5.56865e-06		9.5248e-06	3.80927e-06	7.94713e-06	4.51403e-06	1.17871e-05	1.10669e-05	8.88768e-06	8.35284e-06	2.04071e-05	0.00011052	11	Eukaryotic translation initiation factor 3 subunit J OS=Rattus norvegicus OX=10116 GN=Eif3j PE=1 SV=1
Prefrontal-cortex	P63036	Dnaja1	1.62869e-05	9.94644e-06	1.02588e-05	2.06134e-05	8.56566e-06	1.38336e-05	1.78922e-05	0.00038316	1.20698e-05	1.77165e-05	9.67053e-06	1.86552e-05	0.000538669	12	DnaJ homolog subfamily A member 1 OS=Rattus norvegicus OX=10116 GN=Dnaja1 PE=1 SV=1
Prefrontal-cortex	Q920L2	Sdha	6.22605e-05	9.16658e-05	7.39712e-05	0.000192349	4.61556e-05	0.000155018	2.7875e-05	1.56181e-05	1.08247e-05	8.1344e-05	6.48413e-05	3.83488e-05	0.000860272	12	Succinate dehydrogenase [ubiquinone] flavoprotein subunit, mitochondrial OS=Rattus norvegicus OX=10116 GN=Sdha PE=1 SV=1
Prefrontal-cortex	O88778	Bsn	2.05842e-05	7.39386e-05	3.42181e-05	1.92922e-05	7.99565e-05	9.22723e-05	3.97429e-05	7.59977e-05	2.50041e-05	5.96998e-05	3.87961e-05	2.28405e-05	0.000582343	12	Protein bassoon OS=Rattus norvegicus OX=10116 GN=Bsn PE=1 SV=3
Prefrontal-cortex	D4A6L0	Gpr158	2.39353e-06	2.23362e-05	2.22869e-05		6.96542e-06	6.2791e-06	1.76737e-05	8.22969e-06	3.39808e-06	5.6772e-06	3.95633e-06		9.91961e-05	10	Probable G-protein coupled receptor 158 OS=Rattus norvegicus OX=10116 GN=Gpr158 PE=1 SV=1
Prefrontal-cortex	P16617	Pgk1	0.00232236	0.00162834	0.00212561	0.00148056	0.00204895	0.00221565	0.001601	0.00235122	0.00171996	0.00228599	0.00220945	0.00221074	0.0241998	12	Phosphoglycerate kinase 1 OS=Rattus norvegicus OX=10116 GN=Pgk1 PE=1 SV=2
Prefrontal-cortex	P53042	Ppp5c	5.28296e-05	3.18428e-05	4.94385e-05	3.25816e-05	4.03605e-05	3.56448e-05	0.000194368	0.000212524	0.00013725	0.0002091	4.63915e-05	7.08136e-05	0.00111315	12	Serine/threonine-protein phosphatase 5 OS=Rattus norvegicus OX=10116 GN=Ppp5c PE=1 SV=1
Prefrontal-cortex	P85845	Fscn1	0.000482858	0.00036019	0.000476815	0.000350011	0.000453592	0.00050943	0.000456447	0.000513984	0.000524572	0.000496782	0.00047241	0.000655497	0.00575259	12	Fascin OS=Rattus norvegicus OX=10116 GN=Fscn1 PE=1 SV=2
Prefrontal-cortex	Q6AYH5	Dctn2	0.000180832	0.000130076	0.000135502	9.64977e-05	0.000151166	0.000146641	0.000120738	0.000164657	0.000124786	0.000162672	0.000163899	0.000201878	0.00177934	12	Dynactin subunit 2 OS=Rattus norvegicus OX=10116 GN=Dctn2 PE=1 SV=1
Prefrontal-cortex	P62909	Rps3	0.000178578	0.00015988	0.000149895	0.000100871	0.000119503	0.000177586	0.000200973	0.000105156	0.000175621	0.000225343	0.000246233	0.000261098	0.00210074	12	40S ribosomal protein S3 OS=Rattus norvegicus OX=10116 GN=Rps3 PE=1 SV=1
Prefrontal-cortex	P62775	Mtpn	0.000169461	7.82824e-05	0.000134544	0.00010382	0.000120448	0.000170082	0.00013549	0.000176944	0.000154553	0.00015602	0.000150379	0.00018378	0.0017338	12	Myotrophin OS=Rattus norvegicus OX=10116 GN=Mtpn PE=1 SV=2
Prefrontal-cortex	Q68FS2	Cops4	3.48602e-05	1.09503e-05	2.67805e-05	3.02574e-05	2.37216e-05	2.70338e-05	1.94969e-05	4.61827e-05	2.46477e-05	2.3662e-05	3.12409e-05	2.2305e-05	0.000321139	12	COP9 signalosome complex subunit 4 OS=Rattus norvegicus OX=10116 GN=Cops4 PE=1 SV=1
Prefrontal-cortex	Q5XIF6	Tuba4a	0.00285396	0.00127821	0.00236364	0.00160493	0.00235152	0.00227374	0.00199947	0.00205915	0.00244431	0.0021888	0.00171651	0.00239603	0.0255303	12	Tubulin alpha-4A chain OS=Rattus norvegicus OX=10116 GN=Tuba4a PE=1 SV=1
Prefrontal-cortex	Q91Z79	Ppfia3	2.01591e-05	2.08455e-05	3.84853e-05	3.19706e-05	0.000105258	4.85721e-05	1.89713e-05	6.24115e-05	1.08356e-05	3.74968e-05	2.72287e-05	4.87563e-05	0.000470991	12	Liprin-alpha-3 OS=Rattus norvegicus OX=10116 GN=Ppfia3 PE=1 SV=2
Prefrontal-cortex	Q07647	Slc2a3	5.93944e-06	8.75151e-05	4.73197e-05	4.72077e-06	8.73818e-06	2.46636e-06	6.01747e-05	1.05064e-05		3.55452e-05	4.89891e-06	5.81408e-06	0.000273639	11	Solute carrier family 2, facilitated glucose transporter member 3 OS=Rattus norvegicus OX=10116 GN=Slc2a3 PE=1 SV=1
Prefrontal-cortex	P48037	Anxa6		8.57219e-05	8.2163e-06	1.8636e-06	2.47512e-07		1.15955e-05			2.90002e-06	7.52965e-06		0.000118075	7	Annexin A6 OS=Rattus norvegicus OX=10116 GN=Anxa6 PE=1 SV=2
Prefrontal-cortex	P07483	Fabp3	0.000149627	0.000114311	0.000142552	0.000117356	0.000130313	0.00015602	0.000114964	0.000161518	0.000101081	0.00010322	0.000118508	0.000125503	0.00153497	12	Fatty acid-binding protein, heart OS=Rattus norvegicus OX=10116 GN=Fabp3 PE=1 SV=2
Prefrontal-cortex	P60901	Psma6	6.08476e-05	7.43677e-05	5.89489e-05	4.8756e-05	7.11927e-05	8.56054e-05	5.20692e-05	6.4411e-05	5.70214e-05	8.92514e-05	8.51375e-05	0.00010035	0.000847959	12	Proteasome subunit alpha type-6 OS=Rattus norvegicus OX=10116 GN=Psma6 PE=1 SV=1
Prefrontal-cortex	P28037	Aldh1l1	3.13973e-05	3.27784e-05	1.63207e-05	1.34076e-05	1.05342e-05	1.00871e-05	6.14951e-06	5.23062e-05	4.66419e-06	6.22131e-06	7.84718e-06	3.35989e-06	0.000195074	12	Cytosolic 10-formyltetrahydrofolate dehydrogenase OS=Rattus norvegicus OX=10116 GN=Aldh1l1 PE=1 SV=3
Prefrontal-cortex	Q9QYL8	Lypla2	8.21924e-06	3.08189e-06	7.1815e-06	1.02252e-05	1.6427e-05	9.89044e-06	6.44687e-06	7.18635e-06	4.76036e-06	9.65202e-06	1.746e-05	2.65915e-06	0.00010319	12	Acyl-protein thioesterase 2 OS=Rattus norvegicus OX=10116 GN=Lypla2 PE=1 SV=1
Prefrontal-cortex	Q99MZ8	Lasp1	9.78445e-05	5.51432e-05	0.000157924	0.000120929	0.000146379	0.000167076	0.000142702	8.88436e-05	0.000108136	0.000135188	6.84816e-05	9.35554e-05	0.0013822	12	LIM and SH3 domain protein 1 OS=Rattus norvegicus OX=10116 GN=Lasp1 PE=1 SV=1
Prefrontal-cortex	Q8VIJ5	Oga	1.4585e-05	6.97468e-07	1.00171e-06	2.66867e-06	4.89534e-06	4.13321e-06	9.11389e-06	1.93769e-05	7.15341e-06	3.15941e-06	5.41106e-06	8.7064e-06	8.09025e-05	12	Protein O-GlcNAcase OS=Rattus norvegicus OX=10116 GN=Oga PE=1 SV=1
Prefrontal-cortex	P62250	Rps16	0.000122516	0.000181359	6.93372e-05	8.67287e-05	5.33449e-05	9.51335e-05	0.000118346	5.3235e-05	0.000111122	0.000126569	0.000145633	0.000177305	0.00134063	12	40S ribosomal protein S16 OS=Rattus norvegicus OX=10116 GN=Rps16 PE=1 SV=2
Prefrontal-cortex	Q8R431	Mgll	7.34157e-05	8.22145e-05	0.000127949	7.81437e-05	9.76236e-05	7.74283e-05	7.17658e-05	6.95e-05	4.7413e-05	9.53058e-05	0.000135355	7.13774e-05	0.00102749	12	Monoglyceride lipase OS=Rattus norvegicus OX=10116 GN=Mgll PE=1 SV=1
Prefrontal-cortex	O89046	Coro1b	1.10624e-05	1.8753e-05	2.72369e-05	1.01577e-05	1.7032e-05	3.43166e-05	3.31501e-05	2.10527e-05	2.24733e-05	3.06067e-05	1.30464e-05	1.39699e-05	0.000252858	12	Coronin-1B OS=Rattus norvegicus OX=10116 GN=Coro1b PE=1 SV=1
Prefrontal-cortex	Q7TP52	Cmbl	3.34514e-06			3.91067e-06	1.60381e-06	2.57808e-06		3.47698e-06	4.88721e-06	1.07109e-06	2.29536e-06	2.30999e-06	2.54783e-05	9	Carboxymethylenebutenolidase homolog OS=Rattus norvegicus OX=10116 GN=Cmbl PE=2 SV=1
Prefrontal-cortex	Q4V8B0	Oxr1	9.75349e-05	5.63611e-05	0.000121401	8.64058e-05	0.000176403	0.00029342	0.00010131	9.95942e-05	0.000100169	0.000203115	0.000153122	9.81551e-05	0.00158699	12	Oxidation resistance protein 1 OS=Rattus norvegicus OX=10116 GN=Oxr1 PE=1 SV=3
Prefrontal-cortex	Q5U1Z2	Trappc3	3.22932e-05	5.1741e-06	1.53203e-05	8.96605e-06	2.14392e-05	1.80293e-05	1.84353e-05	2.75885e-05	1.87116e-05	1.83949e-05	3.57881e-05	1.00021e-05	0.000230142	12	Trafficking protein particle complex subunit 3 OS=Rattus norvegicus OX=10116 GN=Trappc3 PE=2 SV=1
Prefrontal-cortex	P14604	Echs1	7.65318e-05	5.21343e-05	7.63387e-05	6.98355e-05	7.50106e-05	0.000117916	6.59283e-05	9.78414e-05	5.60165e-05	7.47487e-05	8.61882e-05	8.15542e-05	0.000930044	12	Enoyl-CoA hydratase, mitochondrial OS=Rattus norvegicus OX=10116 GN=Echs1 PE=1 SV=1
Prefrontal-cortex	Q920A6	Scpep1			1.92764e-06	1.41525e-06	2.90566e-06	2.24248e-06	3.17511e-06	3.47212e-06		4.26756e-06	3.34886e-07		1.97407e-05	8	Retinoid-inducible serine carboxypeptidase OS=Rattus norvegicus OX=10116 GN=Scpep1 PE=2 SV=1
Prefrontal-cortex	Q6AYK6	Cacybp	2.2515e-05	1.71878e-05	1.43575e-05	1.91359e-05	2.27144e-05	3.35089e-05	1.81268e-05	4.06964e-05	4.36934e-05	2.42898e-05	2.54385e-05	3.2266e-05	0.00031393	12	Calcyclin-binding protein OS=Rattus norvegicus OX=10116 GN=Cacybp PE=1 SV=1
Prefrontal-cortex	P00388	Por	4.29443e-06	4.85276e-05	8.30174e-06	1.47938e-06	1.40837e-06	2.51159e-06	5.43656e-06	4.30677e-06	1.10959e-05	1.22721e-05	3.49877e-05	2.64543e-06	0.000137267	12	NADPH--cytochrome P450 reductase OS=Rattus norvegicus OX=10116 GN=Por PE=1 SV=3
Prefrontal-cortex	P04906	Gstp1	0.000184511	0.000120036	0.000179575	0.000131024	0.000249653	0.000336097	0.000241884	0.000288848	0.000254239	0.000266081	0.000359266	0.000308324	0.00291954	12	Glutathione S-transferase P OS=Rattus norvegicus OX=10116 GN=Gstp1 PE=1 SV=2
Prefrontal-cortex	P15650	Acadl	2.01703e-05	9.73588e-06	0.00070748	0.000591778	0.000286456	0.000342945	0.000719104	4.74127e-05	1.50221e-05	0.000453219	0.000406631	2.11926e-05	0.00362115	12	Long-chain specific acyl-CoA dehydrogenase, mitochondrial OS=Rattus norvegicus OX=10116 GN=Acadl PE=1 SV=1
Prefrontal-cortex	O08873	Madd	3.41872e-05	2.02559e-05	1.26725e-05	1.59325e-05	3.75565e-05	2.50509e-05	1.17537e-05	2.00699e-05	1.86219e-05	1.24202e-05	2.33581e-05	2.76168e-05	0.000259496	12	MAP kinase-activating death domain protein OS=Rattus norvegicus OX=10116 GN=Madd PE=1 SV=1
Prefrontal-cortex	Q6PEC1	Tbca	2.17982e-05	9.78278e-06	1.47313e-05	1.85918e-05	2.81953e-05	3.38532e-05	9.22134e-06	2.77347e-05	1.055e-05	1.18118e-05	1.44172e-05	4.33175e-05	0.000244005	12	Tubulin-specific chaperone A OS=Rattus norvegicus OX=10116 GN=Tbca PE=1 SV=1
Prefrontal-cortex	Q3T1J1	Eif5a	8.09895e-05	4.97383e-05	8.23821e-05	5.15865e-05	9.09437e-05	9.4878e-05	6.78403e-05	8.28877e-05	6.98669e-05	9.14138e-05	8.88263e-05	9.1703e-05	0.000943056	12	Eukaryotic translation initiation factor 5A-1 OS=Rattus norvegicus OX=10116 GN=Eif5a PE=1 SV=3
Prefrontal-cortex	Q6P6V0	Gpi	0.00158134	0.00126671	0.0016199	0.00140678	0.00183885	0.0019785	0.00150786	0.0017255	0.00131447	0.00196142	0.00191628	0.00182474	0.0199424	12	Glucose-6-phosphate isomerase OS=Rattus norvegicus OX=10116 GN=Gpi PE=1 SV=1
Prefrontal-cortex	P62959	Hint1	0.000215442	0.000135884	0.000178048	0.000111784	0.000160779	0.000164506	0.000141406	0.000179446	0.000203238	0.000182012	0.000225331	0.000269132	0.00216701	12	Adenosine 5'-monophosphoramidase HINT1 OS=Rattus norvegicus OX=10116 GN=Hint1 PE=1 SV=5
Prefrontal-cortex	P49911	Anp32a	0.000114165	4.26433e-05	2.66211e-05	2.54008e-05	3.97746e-05	5.17527e-05	3.07362e-05	4.28941e-05	7.52798e-05	6.1089e-05	4.62907e-05	6.51379e-05	0.000621785	12	Acidic leucine-rich nuclear phosphoprotein 32 family member A OS=Rattus norvegicus OX=10116 GN=Anp32a PE=2 SV=1
Prefrontal-cortex	Q6P747	Hp1bp3	4.0092e-07	7.55974e-06	1.10953e-05	2.73558e-06	8.53249e-06	9.58411e-06	2.94589e-05	1.12103e-05	7.12862e-06	1.98598e-05	9.63496e-06	6.05055e-06	0.000123251	12	Heterochromatin protein 1-binding protein 3 OS=Rattus norvegicus OX=10116 GN=Hp1bp3 PE=1 SV=1
Prefrontal-cortex	P47971	Nptx1	1.3752e-05	4.01258e-05	1.84121e-05	1.04959e-05	1.0121e-05	1.3754e-05	3.13111e-05	2.3974e-05	2.0828e-05	2.30515e-05	3.14201e-05	3.39147e-05	0.000271161	12	Neuronal pentraxin-1 OS=Rattus norvegicus OX=10116 GN=Nptx1 PE=1 SV=1
Prefrontal-cortex	Q5BJR4	Prune2	4.09317e-06	1.81554e-06		5.04334e-06	4.14728e-06	5.61881e-06	8.50369e-06	7.93258e-06	4.90972e-06	9.40436e-06	1.08375e-05	8.38843e-06	7.06944e-05	11	Protein prune homolog 2 OS=Rattus norvegicus OX=10116 GN=Prune2 PE=1 SV=1
Prefrontal-cortex	Q63617	Hyou1	2.91383e-05	2.87921e-05	4.13534e-05	2.98613e-05	2.98524e-05	3.64043e-05	3.31678e-05	6.08405e-05	2.2137e-05	4.26588e-05	2.29697e-05	4.45979e-05	0.000421773	12	Hypoxia up-regulated protein 1 OS=Rattus norvegicus OX=10116 GN=Hyou1 PE=1 SV=1
Prefrontal-cortex	P13084	Npm1		2.16785e-05	1.24877e-05	6.90734e-06	8.86721e-06	1.35023e-05	1.57012e-05		1.39e-05	1.02139e-05	1.53794e-05		0.000118637	9	Nucleophosmin OS=Rattus norvegicus OX=10116 GN=Npm1 PE=1 SV=1
Prefrontal-cortex	Q91Y81	Septin2	4.215e-06	1.58963e-05	1.00676e-05	1.53872e-07	6.36041e-06	2.45128e-06	1.40035e-05	4.44234e-06	8.85333e-06	1.3362e-05	1.71148e-05	1.32098e-05	0.00011013	12	Septin-2 OS=Rattus norvegicus OX=10116 GN=Septin2 PE=1 SV=1
Prefrontal-cortex	Q63228	Gmfb	0.00013158	7.6612e-05	0.000151799	0.000104037	6.97834e-05	0.000101736	0.000101199	9.45743e-05	9.53114e-05	0.000111391	0.000128314	0.000119424	0.00128576	12	Glia maturation factor beta OS=Rattus norvegicus OX=10116 GN=Gmfb PE=1 SV=2
Prefrontal-cortex	P18395	Csde1	8.41067e-06	3.53297e-06	8.07382e-06	4.31427e-06	8.92083e-06	1.48468e-05	3.86211e-06	9.99791e-06	4.3901e-06	1.09239e-05	4.71489e-06	1.06994e-05	9.26876e-05	12	Cold shock domain-containing protein E1 OS=Rattus norvegicus OX=10116 GN=Csde1 PE=2 SV=1
Prefrontal-cortex	P19139	Csnk2a1	7.88568e-05	5.82371e-05	8.636e-05	6.73763e-05	7.81711e-05	8.30065e-05	7.7116e-05	9.26623e-05	6.81817e-05	8.37981e-05	7.6645e-05	9.79653e-05	0.000948376	12	Casein kinase II subunit alpha OS=Rattus norvegicus OX=10116 GN=Csnk2a1 PE=1 SV=2
Prefrontal-cortex	Q06647	Atp5po	3.14872e-05	0.000122398	6.2668e-05	5.03182e-05	2.46524e-05	1.76852e-05	5.20341e-05	3.27421e-06		6.58714e-05	1.87926e-05	3.33304e-06	0.000452514	11	ATP synthase subunit O, mitochondrial OS=Rattus norvegicus OX=10116 GN=Atp5po PE=1 SV=1
Prefrontal-cortex	Q02589	Adprh			4.32593e-06	2.1714e-06	4.85613e-06	4.51723e-06	4.37974e-06	7.15552e-06	1.89677e-06	4.64343e-06	4.2634e-06		3.82096e-05	9	ADP-ribosylhydrolase ARH1 OS=Rattus norvegicus OX=10116 GN=Adprh PE=1 SV=2
Prefrontal-cortex	P14942	Gsta4	4.47936e-05	1.95948e-05	8.99517e-06	2.9135e-05	4.43767e-05	3.0525e-05	2.7181e-05	1.70507e-05	3.14103e-05	3.9263e-05	7.87302e-05	4.32793e-05	0.000414335	12	Glutathione S-transferase alpha-4 OS=Rattus norvegicus OX=10116 GN=Gsta4 PE=1 SV=2
Prefrontal-cortex	P04904	Gsta3	2.86402e-05	9.05899e-06	2.62117e-05	0.000139091	0.000244344	0.000343296	2.4286e-05	4.13897e-05	4.93761e-05	0.000216563	0.000194041	4.44481e-05	0.00136075	12	Glutathione S-transferase alpha-3 OS=Rattus norvegicus OX=10116 GN=Gsta3 PE=1 SV=3
Prefrontal-cortex	B0BNA5	Cotl1	4.62256e-05	4.81116e-05	6.25412e-05	4.25036e-05	4.85115e-05	6.73894e-05	5.1687e-05	8.93856e-05	6.56257e-05	6.29583e-05	8.66071e-05	9.48148e-05	0.000766361	12	Coactosin-like protein OS=Rattus norvegicus OX=10116 GN=Cotl1 PE=1 SV=1
Prefrontal-cortex	P16884	Nefh		0.000116134	4.99706e-06		1.50408e-05	1.38451e-05	3.54345e-05	3.57246e-05	5.78468e-05	4.55773e-05	1.87985e-05	3.69201e-05	0.000380319	10	Neurofilament heavy polypeptide OS=Rattus norvegicus OX=10116 GN=Nefh PE=1 SV=4
Prefrontal-cortex	P13803	Etfa	2.21359e-05	1.35008e-05	2.32602e-05	2.46219e-05	2.00964e-05	2.95922e-05	1.6927e-05	3.61872e-05	3.06411e-05	2.6515e-05	4.22488e-05	2.66987e-05	0.000312425	12	Electron transfer flavoprotein subunit alpha, mitochondrial OS=Rattus norvegicus OX=10116 GN=Etfa PE=1 SV=4
Prefrontal-cortex	P62752	Rpl23a	2.52679e-05		0.00037221	1.55232e-05	2.86674e-05		4.72939e-05	2.62613e-05	3.14276e-05	3.5063e-05	3.85909e-05	3.46272e-05	0.000654932	10	60S ribosomal protein L23a OS=Rattus norvegicus OX=10116 GN=Rpl23a PE=2 SV=1
Prefrontal-cortex	Q75Q39	Tomm70	6.56807e-07	5.73279e-06	5.80707e-06	3.07632e-06	1.45598e-06	2.46864e-06	3.61573e-06		0.000175405	1.05841e-05	4.61283e-06		0.000213416	10	Mitochondrial import receptor subunit TOM70 OS=Rattus norvegicus OX=10116 GN=Tomm70 PE=1 SV=1
Prefrontal-cortex	Q8R478	Wbp2	2.09129e-05	6.53866e-06	1.63166e-05	6.28049e-06	1.01592e-05	1.7828e-05	1.33067e-05	2.21985e-05	1.66622e-05	2.0532e-05	1.7257e-05	1.51368e-05	0.000183129	12	WW domain-binding protein 2 OS=Rattus norvegicus OX=10116 GN=Wbp2 PE=1 SV=1
Prefrontal-cortex	Q9JHW0	Psmb7	2.27547e-05	1.52288e-05	4.3306e-05	1.97414e-05	4.92373e-05	5.62332e-05	4.80943e-05	5.3866e-05	3.54624e-05	4.56381e-05	6.88596e-05	5.83756e-05	0.000516797	12	Proteasome subunit beta type-7 OS=Rattus norvegicus OX=10116 GN=Psmb7 PE=1 SV=1
Prefrontal-cortex	Q4V7D2	Rogdi	3.09334e-05	4.29306e-05	3.03196e-05	2.58636e-05	2.40578e-05	2.18404e-05	2.36932e-05	3.95406e-05	2.69714e-05	6.59941e-05	5.76568e-05	5.05705e-05	0.000440372	12	Protein rogdi homolog OS=Rattus norvegicus OX=10116 GN=Rogdi PE=1 SV=1
Prefrontal-cortex	Q8K1Q0	Nmt1	3.1671e-05	6.59593e-06	1.51557e-05	9.49009e-06	1.37693e-05	8.88804e-06	1.68501e-05	1.64517e-05	1.02251e-05	1.74579e-05	2.44829e-05	1.0775e-05	0.000181813	12	Glycylpeptide N-tetradecanoyltransferase 1 OS=Rattus norvegicus OX=10116 GN=Nmt1 PE=1 SV=1
Prefrontal-cortex	Q01205	Dlst	0.000256635	0.000300629	0.000231101	0.000156913	0.000114362	0.000209074	0.000197867	0.0002868	0.000178013	0.000217559	0.000359879	0.000182563	0.0026914	12	Dihydrolipoyllysine-residue succinyltransferase component of 2-oxoglutarate dehydrogenase complex, mitochondrial OS=Rattus norvegicus OX=10116 GN=Dlst PE=1 SV=2
Prefrontal-cortex	P13638	Atp1b2	2.31696e-05	0.000179771	0.000275643	2.83058e-05	2.86603e-05	3.84848e-05	0.000104919	1.46254e-05	4.60673e-06	4.88153e-05	2.20304e-05	1.02655e-05	0.000779297	12	Sodium/potassium-transporting ATPase subunit beta-2 OS=Rattus norvegicus OX=10116 GN=Atp1b2 PE=1 SV=1
Prefrontal-cortex	Q1M168	Atcay	1.35792e-05	5.13976e-06	2.85599e-06	5.04764e-06	2.48139e-05	9.98434e-06	9.33391e-06	1.00612e-05	1.34524e-05	9.50334e-06	1.21934e-05	1.55402e-05	0.000131505	12	Caytaxin OS=Rattus norvegicus OX=10116 GN=Atcay PE=1 SV=1
Prefrontal-cortex	P11762	Lgals1	1.83462e-05	7.01243e-06	6.20433e-06	3.8528e-06	4.87934e-06	1.44314e-05	5.35219e-06	1.37426e-05	2.31257e-05	1.72774e-05	3.20384e-05	1.80528e-05	0.000164316	12	Galectin-1 OS=Rattus norvegicus OX=10116 GN=Lgals1 PE=1 SV=2
Prefrontal-cortex	Q6AYS7	Acy1a	7.30448e-06	1.85016e-06	4.86179e-06	3.98818e-06	8.67475e-06	2.59234e-06	4.71187e-06	7.53193e-06	3.78142e-06	5.74035e-06	2.8532e-06		5.38905e-05	11	Aminoacylase-1A OS=Rattus norvegicus OX=10116 GN=Acy1a PE=1 SV=1
Prefrontal-cortex	P30713	Gstt2				1.58557e-06	2.04071e-06	7.01828e-06			7.96385e-07		6.31745e-06	2.81623e-06	2.05746e-05	6	Glutathione S-transferase theta-2 OS=Rattus norvegicus OX=10116 GN=Gstt2 PE=1 SV=3
Prefrontal-cortex	P62870	Elob	8.79991e-05	5.80223e-05	6.23788e-05	4.06986e-05	5.82273e-05	6.65617e-05	5.18191e-05	6.3397e-05	5.38495e-05	3.9919e-05	7.20215e-05	9.23119e-05	0.000747206	12	Elongin-B OS=Rattus norvegicus OX=10116 GN=Elob PE=1 SV=1
Prefrontal-cortex	P62890	Rpl30	2.33448e-05	4.54437e-05	2.33074e-05	1.54506e-05	2.90403e-05	3.65913e-05	4.38223e-05	3.44002e-05	4.52535e-05	3.57931e-05	4.86422e-05	4.75816e-05	0.000428671	12	60S ribosomal protein L30 OS=Rattus norvegicus OX=10116 GN=Rpl30 PE=3 SV=2
Prefrontal-cortex	P07825	Syp	0.000493736	0.0017003	0.00128997	0.000538192	0.000844849	0.000680969	0.00189985	0.000828436	0.00040246	0.000825819	0.0012129	0.000541399	0.0112589	12	Synaptophysin OS=Rattus norvegicus OX=10116 GN=Syp PE=1 SV=1
Prefrontal-cortex	B0LT89	Stk24	8.30002e-06	6.60624e-06	4.89233e-06	3.18081e-06	5.1044e-06	3.7709e-06	6.16037e-06	5.41044e-06	6.03598e-06		3.62061e-06	7.46301e-06	6.05451e-05	11	Serine/threonine-protein kinase 24 OS=Rattus norvegicus OX=10116 GN=Stk24 PE=2 SV=1
Prefrontal-cortex	Q04631	Fnta	6.42545e-07			1.12462e-06		4.67927e-07		1.13984e-06	1.45891e-06	5.0549e-07	4.10538e-07	7.67803e-07	6.51768e-06	8	Protein farnesyltransferase/geranylgeranyltransferase type-1 subunit alpha OS=Rattus norvegicus OX=10116 GN=Fnta PE=1 SV=1
Prefrontal-cortex	O88339	Epn1	3.409e-05	1.75757e-06	5.67937e-05	3.70224e-05	6.13003e-05	6.04255e-05	2.9959e-05	6.21675e-05	1.20246e-05	5.13479e-05	6.5747e-05	3.12105e-05	0.000503846	12	Epsin-1 OS=Rattus norvegicus OX=10116 GN=Epn1 PE=1 SV=1
Prefrontal-cortex	Q6P9T8	Tubb4b	0.00125679	0.000738086	0.00160064	0.00100307	0.00181707	0.00144589	0.00147797	0.00146973	0.00128813	0.00163625	0.00149767	0.00132303	0.0165543	12	Tubulin beta-4B chain OS=Rattus norvegicus OX=10116 GN=Tubb4b PE=1 SV=1
Prefrontal-cortex	P69897	Tubb5	0.000714561	0.000618744	0.001057	0.000425379	0.000503492	0.000574805	0.000925784	0.000607013	0.000825509	0.000719023	0.000843846	0.000737156	0.00855231	12	Tubulin beta-5 chain OS=Rattus norvegicus OX=10116 GN=Tubb5 PE=1 SV=1
Prefrontal-cortex	Q6PDV7	Rpl10	1.81309e-05	3.38352e-05	5.59392e-05	1.88112e-05	2.89346e-05	5.30813e-05	6.63863e-05	2.62917e-05	1.48092e-05	5.31551e-05	7.61193e-05	3.38385e-05	0.000479333	12	60S ribosomal protein L10 OS=Rattus norvegicus OX=10116 GN=Rpl10 PE=1 SV=3
Prefrontal-cortex	Q1WIM3	Cadm3	8.97842e-06	0.000119675	7.86982e-05	2.30605e-05	1.21669e-05	1.38119e-05	6.17048e-05	1.06248e-05	9.05746e-06	2.72239e-05	2.46736e-05	1.01935e-05	0.000399869	12	Cell adhesion molecule 3 OS=Rattus norvegicus OX=10116 GN=Cadm3 PE=1 SV=1
Prefrontal-cortex	O88377	Pip4k2b	3.78859e-05	1.80236e-05	1.91355e-05	2.37121e-05	3.23201e-05	4.32043e-05	2.55994e-05	3.83633e-05	2.10556e-05	3.01466e-05	2.99045e-05	2.11476e-05	0.000340498	12	Phosphatidylinositol 5-phosphate 4-kinase type-2 beta OS=Rattus norvegicus OX=10116 GN=Pip4k2b PE=1 SV=1
Prefrontal-cortex	Q9WVK7	Hadh	4.20822e-06	1.70707e-06	8.10009e-06	5.05646e-06	5.80449e-06	9.10508e-06	5.56344e-06	1.35065e-05	1.00004e-05	1.47133e-05	2.03716e-05	1.24247e-05	0.000110561	12	Hydroxyacyl-coenzyme A dehydrogenase, mitochondrial OS=Rattus norvegicus OX=10116 GN=Hadh PE=2 SV=1
Prefrontal-cortex	Q9Z269	Vapb		3.10799e-05	4.63793e-06	4.17588e-06	5.98697e-06	1.82105e-06	6.82558e-06	1.68814e-05	8.84909e-06	9.08257e-06	1.94716e-05	1.34527e-05	0.000122265	11	Vesicle-associated membrane protein-associated protein B OS=Rattus norvegicus OX=10116 GN=Vapb PE=1 SV=3
Prefrontal-cortex	P69735	Rab3gap1	2.19879e-07		1.73224e-05	1.65123e-06	2.21805e-06	2.01696e-06	2.79942e-06	4.05751e-06	2.6532e-06	4.31116e-06	2.52974e-06	2.28737e-06	4.20669e-05	11	Rab3 GTPase-activating protein catalytic subunit (Fragments) OS=Rattus norvegicus OX=10116 GN=Rab3gap1 PE=1 SV=2
Prefrontal-cortex	O55148	Gas7	5.39605e-06	1.16568e-05	2.12657e-05	1.17085e-05	8.91522e-06	9.31873e-06	3.02479e-05	9.76809e-06	4.2355e-06	1.13785e-05	1.00389e-05	6.99269e-06	0.000140923	12	Growth arrest-specific protein 7 OS=Rattus norvegicus OX=10116 GN=Gas7 PE=2 SV=2
Prefrontal-cortex	P11980	Pkm	0.00123451	0.00103867	0.000869923	0.000650373	0.000856151	0.000854233	0.000830514	0.000988108	0.000945972	0.0010865	0.000829043	0.00135581	0.0115398	12	Pyruvate kinase PKM OS=Rattus norvegicus OX=10116 GN=Pkm PE=1 SV=3
Prefrontal-cortex	P11980-2	Pkm	2.72666e-05	1.35833e-05	1.34302e-05	9.34336e-06	1.02691e-05	9.95204e-06	1.43546e-05	1.61132e-05	2.4904e-05	1.80427e-05	1.2513e-05	3.30136e-05	0.000202786	12	Isoform M2 of Pyruvate kinase PKM OS=Rattus norvegicus OX=10116 GN=Pkm
Prefrontal-cortex	P16086	Sptan1	0.00290234	0.005839	0.00537478	0.00196856	0.00333995	0.00409544	0.00465603	0.00396821	0.0037351	0.0047938	0.00596405	0.00433437	0.0509716	12	Spectrin alpha chain, non-erythrocytic 1 OS=Rattus norvegicus OX=10116 GN=Sptan1 PE=1 SV=2
Prefrontal-cortex	P02770	Alb	0.00320414	0.00348075	0.0021306	0.00165974	0.00172842	0.00326196	0.00241091	0.00195801	0.00273826	0.00125543	0.00279671	0.00219736	0.0288223	12	Albumin OS=Rattus norvegicus OX=10116 GN=Alb PE=1 SV=2
Prefrontal-cortex	P08009	Gstm7	0.000215713	0.000102547	0.000225095	0.000157742	0.000206632	0.00019877	0.000176261	0.000174914	0.000129522	0.000238308	0.000217803	0.00018454	0.00222785	12	Glutathione S-transferase Mu 7 OS=Rattus norvegicus OX=10116 GN=Gstm7 PE=1 SV=2
Prefrontal-cortex	Q6P6R2	Dld	0.000485299	0.000399843	0.000543185	0.000292159	0.000258373	0.000441481	0.000392427	0.000499092	0.000417203	0.000497221	0.000721475	0.000450582	0.00539834	12	Dihydrolipoyl dehydrogenase, mitochondrial OS=Rattus norvegicus OX=10116 GN=Dld PE=1 SV=1
Prefrontal-cortex	P07335	Ckb	0.00763818	0.00413769	0.00679283	0.0046742	0.00790526	0.00749648	0.00588344	0.00717582	0.00639435	0.0074744	0.00741671	0.00712105	0.0801104	12	Creatine kinase B-type OS=Rattus norvegicus OX=10116 GN=Ckb PE=1 SV=2
Prefrontal-cortex	P85108	Tubb2a	0.000571212	0.000583918	0.000807966	0.000570174	0.000876443	0.000875287	0.000862683	0.000749917	0.000733677	0.000736556	0.000860387	0.00112666	0.00935488	12	Tubulin beta-2A chain OS=Rattus norvegicus OX=10116 GN=Tubb2a PE=1 SV=1
Prefrontal-cortex	P11517	Hemoglobin subunit beta-2 OS=Rattus norvegicus OX=10116	0.000843779	0.000974157	0.000707758	0.000653159	0.000715607	0.00104209	0.00101385	0.000363078	0.000534637	0.000533149	0.00100783	0.000326669	0.00871577	12	Hemoglobin subunit beta-2 OS=Rattus norvegicus OX=10116 PE=1 SV=2
Prefrontal-cortex	P02091	Hbb	0.00437568	0.00492861	0.00515356	0.0040129	0.00290757	0.0045931	0.00490215	0.00244306	0.00521559	0.00147644	0.00530177	0.00322992	0.0485403	12	Hemoglobin subunit beta-1 OS=Rattus norvegicus OX=10116 GN=Hbb PE=1 SV=3
Prefrontal-cortex	P04764	Eno1	0.00151802	0.00122984	0.00204563	0.00134093	0.00177571	0.00227996	0.00135329	0.00227862	0.00163286	0.00196188	0.00194735	0.00218809	0.0215522	12	Alpha-enolase OS=Rattus norvegicus OX=10116 GN=Eno1 PE=1 SV=4
Prefrontal-cortex	P47942	Dpysl2	0.00615084	0.00480234	0.0057993	0.00402187	0.00585365	0.00653288	0.005131	0.00666115	0.00553993	0.00620485	0.00611713	0.00640878	0.0692237	12	Dihydropyrimidinase-related protein 2 OS=Rattus norvegicus OX=10116 GN=Dpysl2 PE=1 SV=1
Prefrontal-cortex	O08875	Dclk1	0.00010588	9.21542e-05	0.000147619	7.87994e-05	0.000102781	0.000115934	0.000121464	0.000152584	0.000110457	0.000102204	0.000102998	0.000116993	0.00134987	12	Serine/threonine-protein kinase DCLK1 OS=Rattus norvegicus OX=10116 GN=Dclk1 PE=1 SV=1
Prefrontal-cortex	Q6AY84	Scrn1	0.000185697	0.000104389	0.00019929	0.000104662	0.000219068	0.0002197	0.000150635	0.000171738	0.000149763	0.000185822	0.000151345	0.000212435	0.00205454	12	Secernin-1 OS=Rattus norvegicus OX=10116 GN=Scrn1 PE=1 SV=1
Prefrontal-cortex	P07171	Calb1	0.000291889	0.000246824	0.000253739	0.000192111	0.000244768	0.000236446	0.000198697	0.000131891	0.00014247	0.00017121	0.000120167	0.000181661	0.00241187	12	Calbindin OS=Rattus norvegicus OX=10116 GN=Calb1 PE=1 SV=2
Prefrontal-cortex	P01946	Hba1	0.00898434	0.0137408	0.0139529	0.010412	0.00719385	0.0127996	0.00989202	0.00573548	0.00891403	0.00579433	0.0111721	0.00655141	0.115143	12	Hemoglobin subunit alpha-1/2 OS=Rattus norvegicus OX=10116 GN=Hba1 PE=1 SV=3
Prefrontal-cortex	Q6AXU6	JPT1	1.01929e-05	2.42104e-06	3.59569e-06	1.22597e-05	1.07101e-05	8.46499e-06	5.88253e-06	7.43461e-06	6.79615e-06	8.70095e-06	5.12803e-06	1.45216e-05	9.61084e-05	12	Jupiter microtubule associated homolog 1 OS=Rattus norvegicus OX=10116 GN=JPT1 PE=1 SV=3
Prefrontal-cortex	P12369	Prkar2b	0.000119854	0.000163951	0.000211583	0.000105932	0.000132118	0.000130558	0.000159671	0.00012494	0.000108786	0.000160382	0.000137213	0.000101989	0.00165698	12	cAMP-dependent protein kinase type II-beta regulatory subunit OS=Rattus norvegicus OX=10116 GN=Prkar2b PE=1 SV=3
Prefrontal-cortex	P50554	Abat	0.000484918	0.000339357	0.000480104	0.000427091	0.000398489	0.000531866	0.000394866	0.000699506	0.000564817	0.000544722	0.00077653	0.000625308	0.00626757	12	4-aminobutyrate aminotransferase, mitochondrial OS=Rattus norvegicus OX=10116 GN=Abat PE=1 SV=3
Prefrontal-cortex	Q63716	Prdx1	0.000253812	0.000136825	0.000270088	0.000174913	0.000255251	0.000358821	0.000219882	0.000295786	0.000246182	0.000231328	0.00031757	0.000292639	0.00305309	12	Peroxiredoxin-1 OS=Rattus norvegicus OX=10116 GN=Prdx1 PE=1 SV=1
Prefrontal-cortex	P10760	Ahcy	9.64293e-05	5.72373e-05	0.000119713	8.53619e-05	0.000120666	0.000138297	0.00012342	0.000179562	0.000168836	0.000168412	0.000195154	0.000198678	0.00165177	12	Adenosylhomocysteinase OS=Rattus norvegicus OX=10116 GN=Ahcy PE=1 SV=3
Prefrontal-cortex	P05197	Eef2	0.000652848	0.00047518	0.000739197	0.000428033	0.000608183	0.000720141	0.000549485	0.000599093	0.000617196	0.00055219	0.000660354	0.000867755	0.00746965	12	Elongation factor 2 OS=Rattus norvegicus OX=10116 GN=Eef2 PE=1 SV=4
Prefrontal-cortex	P14046	A1i3	5.39137e-05	4.11612e-05	2.67065e-05	1.90086e-05	1.49961e-05	3.6627e-05	1.57032e-05		5.25352e-06	4.45741e-06	2.04321e-06		0.00021987	10	Alpha-1-inhibitor 3 OS=Rattus norvegicus OX=10116 GN=A1i3 PE=1 SV=1
Prefrontal-cortex	Q9JK11	Rtn4	6.75358e-05	5.09247e-05	6.67823e-05	6.54997e-05	7.66168e-05	7.38304e-05	0.000111666	9.71146e-05	6.96887e-05	8.23387e-05	0.000124102	0.000125055	0.00101116	12	Reticulon-4 OS=Rattus norvegicus OX=10116 GN=Rtn4 PE=1 SV=1
Prefrontal-cortex	P31044	Pebp1	0.00172833	0.000981212	0.00139604	0.00107545	0.00134733	0.00163862	0.00110429	0.00153734	0.00144868	0.00138031	0.00135214	0.0015177	0.0165074	12	Phosphatidylethanolamine-binding protein 1 OS=Rattus norvegicus OX=10116 GN=Pebp1 PE=1 SV=3
Prefrontal-cortex	P62138	Ppp1ca	3.12577e-05	7.49045e-05	0.00107005	1.55572e-05		2.30532e-05	2.55087e-05	3.23674e-05	3.00677e-05	3.50732e-05	2.41072e-05	4.13154e-05	0.00140326	11	Serine/threonine-protein phosphatase PP1-alpha catalytic subunit OS=Rattus norvegicus OX=10116 GN=Ppp1ca PE=1 SV=1
Prefrontal-cortex	P62142	Ppp1cb	1.44397e-05	1.38485e-05	1.63021e-05	8.49726e-06	1.01684e-05	8.29653e-06	2.93499e-05	1.877e-05	8.60537e-06	2.36109e-05	3.34077e-05	2.09113e-05	0.000206208	12	Serine/threonine-protein phosphatase PP1-beta catalytic subunit OS=Rattus norvegicus OX=10116 GN=Ppp1cb PE=1 SV=3
Prefrontal-cortex	Q4V7C7	Actr3	0.000377688	0.000325868	0.000401395	0.000244898	0.000241175	0.000276445	0.000379223	0.000376134	0.000260849	0.000326518	0.000396417	0.000308351	0.00391496	12	Actin-related protein 3 OS=Rattus norvegicus OX=10116 GN=Actr3 PE=1 SV=1
Prefrontal-cortex	P61983	Ywhag	0.000727817	0.000417964	0.000599379	0.00048539	0.000682852	0.000754638	0.000589009	0.000755246	0.000622749	0.000748823	0.000719095	0.000700853	0.00780381	12	14-3-3 protein gamma OS=Rattus norvegicus OX=10116 GN=Ywhag PE=1 SV=2
Prefrontal-cortex	P0DJJ3	Sgip1	3.05787e-05	3.5601e-05	6.23127e-05	3.2456e-05	4.94202e-05	5.08092e-05	6.34592e-05	8.5338e-05	5.28544e-05	6.26464e-05	8.77927e-05	4.61662e-05	0.000659435	12	SH3-containing GRB2-like protein 3-interacting protein 1 OS=Rattus norvegicus OX=10116 GN=Sgip1 PE=1 SV=1
Prefrontal-cortex	B2RYW9	Fahd2	7.78805e-05	3.83519e-05	7.00527e-05	7.17178e-05	6.97622e-05	4.98566e-05	6.39174e-05	6.36353e-05	4.93035e-05	5.3491e-05	5.78479e-05	6.43415e-05	0.000730158	12	Fumarylacetoacetate hydrolase domain-containing protein 2 OS=Rattus norvegicus OX=10116 GN=Fahd2 PE=1 SV=1
Prefrontal-cortex	P85971	Pgls	1.52704e-05	8.014e-06	1.15172e-05	1.35649e-05	1.19795e-05	1.45396e-05	7.1019e-06	1.90388e-05	1.05862e-05	1.59518e-05	1.60205e-05	2.14287e-05	0.000165014	12	6-phosphogluconolactonase OS=Rattus norvegicus OX=10116 GN=Pgls PE=1 SV=1
Prefrontal-cortex	Q9Z2F5	Ctbp1	0.000113494	0.000117438	0.000103793	9.4483e-05	9.30514e-05	0.000102238	8.97156e-05	0.000121968	0.000101396	0.000122188	8.76767e-05	0.000102107	0.00124955	12	C-terminal-binding protein 1 OS=Rattus norvegicus OX=10116 GN=Ctbp1 PE=1 SV=3
Prefrontal-cortex	Q8VD52	Pdxp	0.00014213	4.30886e-05	0.000119024	0.000126591	0.000131966	0.000130843	0.000121753	0.000307102	0.000139924	0.000224574	0.000120537	0.000142324	0.00174986	12	Chronophin OS=Rattus norvegicus OX=10116 GN=Pdxp PE=1 SV=2
Prefrontal-cortex	P38652	Pgm1	0.000211358	0.000139015	0.000181572	0.000162216	0.000242683	0.00023853	0.000171739	0.000240991	0.000152166	0.000181005	0.000214047	0.000220117	0.00235544	12	Phosphoglucomutase-1 OS=Rattus norvegicus OX=10116 GN=Pgm1 PE=1 SV=2
Prefrontal-cortex	Q78P75	Dynll2	9.06741e-06		0.00019867	9.50772e-05	0.000112833	0.000132707	9.21576e-05	0.000110428	1.25275e-05	9.31351e-05	0.000107355	1.24077e-05	0.000976366	11	Dynein light chain 2, cytoplasmic OS=Rattus norvegicus OX=10116 GN=Dynll2 PE=1 SV=1
Prefrontal-cortex	Q3T1K5	Capza2	6.28989e-05	0.000142349	0.000158613	0.000114884	9.05162e-05	8.15818e-05	9.61944e-05	0.000126094	0.00014147	0.000112368	0.000127518	0.000126176	0.00138066	12	F-actin-capping protein subunit alpha-2 OS=Rattus norvegicus OX=10116 GN=Capza2 PE=1 SV=1
Prefrontal-cortex	P47709	Rph3a	0.000119508	0.000125377	0.000114319	8.22019e-05	0.000148254	8.62908e-05	0.000138962	6.98738e-05	0.000104204	8.85036e-05	7.40059e-05	6.99323e-05	0.00122143	12	Rabphilin-3A OS=Rattus norvegicus OX=10116 GN=Rph3a PE=1 SV=1
Prefrontal-cortex	B0BNN3	Ca1	0.000101422	0.000155518	9.76544e-05	0.000121289	5.4676e-05	0.000130819	8.27385e-05	1.13578e-05	0.000115698	5.4666e-05	0.000105416	8.09211e-05	0.00111217	12	Carbonic anhydrase 1 OS=Rattus norvegicus OX=10116 GN=Ca1 PE=1 SV=1
Prefrontal-cortex	P62193	Psmc1	7.23135e-05	3.60968e-05	5.68169e-05	3.27197e-05	4.78545e-05	5.73603e-05	4.54769e-05	5.94908e-05	3.2324e-05	5.19929e-05	7.38043e-05	8.63888e-05	0.00065264	12	26S proteasome regulatory subunit 4 OS=Rattus norvegicus OX=10116 GN=Psmc1 PE=1 SV=1
Prefrontal-cortex	P62198	Psmc5	4.34525e-05	3.39318e-05	3.57849e-05	3.5573e-05	4.99172e-05	4.11938e-05	3.31937e-05	5.01584e-05	3.13655e-05	4.43155e-05	6.28476e-05	4.74502e-05	0.000509184	12	26S proteasome regulatory subunit 8 OS=Rattus norvegicus OX=10116 GN=Psmc5 PE=1 SV=1
Prefrontal-cortex	P07936	Gap43	2.41925e-05	3.72138e-05	3.53787e-05	2.06016e-05	3.47188e-05	3.48756e-05	4.12814e-05	2.1298e-05	3.07921e-05	3.4736e-05	3.43133e-05	2.44869e-05	0.000373889	12	Neuromodulin OS=Rattus norvegicus OX=10116 GN=Gap43 PE=1 SV=1
Prefrontal-cortex	P63012	Rab3a	0.000343098	0.000297742	0.000842611	0.000536649	0.000618888	0.000688491	0.00060272	0.000636947	0.000410702	0.000588911	0.000707944	0.000491174	0.00676588	12	Ras-related protein Rab-3A OS=Rattus norvegicus OX=10116 GN=Rab3a PE=1 SV=1
Prefrontal-cortex	P85970	Arpc2	0.00014056	0.000206207	0.000386223	0.000197224	0.000265325	0.000246529	0.000198752	0.000279854	0.00012201	0.000256506	0.000294943	0.000189531	0.00278366	12	Actin-related protein 2/3 complex subunit 2 OS=Rattus norvegicus OX=10116 GN=Arpc2 PE=1 SV=1
Prefrontal-cortex	P18420	Psma1	6.7818e-05	3.85591e-05	6.20363e-05	3.897e-05	5.88711e-05	8.24419e-05	4.33214e-05	6.17924e-05	5.20629e-05	6.94163e-05	0.000114926	8.48876e-05	0.000775103	12	Proteasome subunit alpha type-1 OS=Rattus norvegicus OX=10116 GN=Psma1 PE=1 SV=2
Prefrontal-cortex	P00787	Ctsb	4.34371e-05	2.79807e-05	6.08819e-05	5.01412e-05	7.38953e-05	8.21171e-05	5.57512e-05	0.000380787	7.37809e-05	5.15746e-05	0.000100467	7.21385e-05	0.00107295	12	Cathepsin B OS=Rattus norvegicus OX=10116 GN=Ctsb PE=1 SV=2
Prefrontal-cortex	P63045	Vamp2	6.94541e-05	0.00016636	9.77413e-05	7.70163e-05	0.000143541	0.00011265	0.000223823	0.000156471	8.01172e-05	0.000198668	0.000177279	0.00010107	0.00160419	12	Vesicle-associated membrane protein 2 OS=Rattus norvegicus OX=10116 GN=Vamp2 PE=1 SV=2
Prefrontal-cortex	Q66HF8	Aldh1b1	6.93118e-06	4.89204e-06	7.36967e-06	7.53954e-06	2.33956e-06	4.64298e-06	6.22325e-06	1.59215e-05	6.75216e-06	8.01264e-06	1.09777e-05	8.13924e-06	8.97414e-05	12	Aldehyde dehydrogenase X, mitochondrial OS=Rattus norvegicus OX=10116 GN=Aldh1b1 PE=1 SV=1
Prefrontal-cortex	Q63525	Nudc	1.90531e-05	5.53001e-06	2.87198e-05	4.06921e-05	8.51143e-05	3.38732e-05	0.000125856	0.00012698	2.44809e-05	7.39175e-05	9.23759e-05	0.00016721	0.000823803	12	Nuclear migration protein nudC OS=Rattus norvegicus OX=10116 GN=Nudc PE=1 SV=1
Prefrontal-cortex	Q5I6B8	Pip5k1c	3.57822e-05	3.47207e-05	6.51825e-05	4.84814e-05	7.02731e-05	5.4574e-05	4.32157e-05	9.03e-05	4.93968e-05	4.69058e-05	5.29504e-05	3.10312e-05	0.000622814	12	Phosphatidylinositol 4-phosphate 5-kinase type-1 gamma OS=Rattus norvegicus OX=10116 GN=Pip5k1c PE=1 SV=1
Prefrontal-cortex	P06685	Atp1a1	0.000307906	0.00168255	0.00128636	0.000332992	0.000369958	0.000303169	0.00078001	0.000142718	9.54555e-05	0.000479538	0.000299657	0.000118016	0.00619832	12	Sodium/potassium-transporting ATPase subunit alpha-1 OS=Rattus norvegicus OX=10116 GN=Atp1a1 PE=1 SV=1
Prefrontal-cortex	Q9JIX3	Fhit	4.36076e-06		3.90805e-06	6.97565e-06	6.54598e-06	4.34101e-06	4.77735e-06	9.32201e-06	3.23144e-06	6.37397e-06	5.85144e-06		5.56877e-05	10	Bis(5'-adenosyl)-triphosphatase OS=Rattus norvegicus OX=10116 GN=Fhit PE=1 SV=1
Prefrontal-cortex	P45479	Ppt1	1.69134e-05	1.3708e-05	2.143e-05	1.06908e-05	8.49504e-06	1.50113e-05	1.82425e-05	2.20217e-05	1.7774e-05	2.35832e-05	2.17107e-05	1.93356e-05	0.000208916	12	Palmitoyl-protein thioesterase 1 OS=Rattus norvegicus OX=10116 GN=Ppt1 PE=1 SV=1
Prefrontal-cortex	Q63569	Psmc3	4.29095e-05	2.15548e-05	5.19369e-05	4.77699e-05	8.20895e-05	5.90375e-05	4.97118e-05	5.30098e-05	3.57325e-05	4.72755e-05	8.04606e-05	6.13748e-05	0.000632863	12	26S proteasome regulatory subunit 6A OS=Rattus norvegicus OX=10116 GN=Psmc3 PE=1 SV=1
Prefrontal-cortex	P46462	Vcp	0.00077479	0.000470123	0.000673528	0.000436232	0.000750787	0.000772199	0.000744871	0.000858157	0.00061423	0.00087034	0.00101516	0.000809496	0.00878991	12	Transitional endoplasmic reticulum ATPase OS=Rattus norvegicus OX=10116 GN=Vcp PE=1 SV=3
Prefrontal-cortex	B0BN94	Fam136a	2.61625e-06		1.36175e-05	1.08217e-05	7.0546e-06	9.75421e-06	6.93976e-06	8.4599e-06		8.6404e-06	5.74375e-06		7.36481e-05	9	Protein FAM136A OS=Rattus norvegicus OX=10116 GN=Fam136a PE=1 SV=1
Prefrontal-cortex	P19804	Nme2	0.000262667	0.00022723	0.000291061	0.000258242	0.000211351	0.000342412	0.000251901	0.000276724	0.000234824	0.000324661	0.000265571	0.000385139	0.00333178	12	Nucleoside diphosphate kinase B OS=Rattus norvegicus OX=10116 GN=Nme2 PE=1 SV=1
Prefrontal-cortex	P54311	Gnb1	0.00010579	0.000567658	0.000390067	0.000131064	0.000153296	0.00010783	0.000369441	9.59613e-05	0.000100606	0.000184556	0.00021603	0.000119031	0.00254133	12	Guanine nucleotide-binding protein G(I)/G(S)/G(T) subunit beta-1 OS=Rattus norvegicus OX=10116 GN=Gnb1 PE=1 SV=4
Prefrontal-cortex	P15087	Cpe	1.90691e-05	2.29302e-05	1.77878e-05	2.3941e-05	2.1921e-05	3.43301e-05	3.20474e-05	5.79753e-05	3.46823e-05	5.63328e-05	5.36102e-05	5.96871e-05	0.000434314	12	Carboxypeptidase E OS=Rattus norvegicus OX=10116 GN=Cpe PE=1 SV=1
Prefrontal-cortex	P27605	Hprt1	0.000255763	0.000216922	0.000204623	0.000163557	0.000219994	0.000223575	0.000202281	0.000272283	0.000183927	0.000246622	0.000275279	0.000270293	0.00273512	12	Hypoxanthine-guanine phosphoribosyltransferase OS=Rattus norvegicus OX=10116 GN=Hprt1 PE=1 SV=1
Prefrontal-cortex	Q5XI32	Capzb	0.000165615	0.000268648	0.00026424	0.000164432	0.000202546	0.000230661	0.000213315	0.000241008	0.000168366	0.000185167	0.0002311	0.000219064	0.00255416	12	F-actin-capping protein subunit beta OS=Rattus norvegicus OX=10116 GN=Capzb PE=1 SV=1
Prefrontal-cortex	O35824	Dnaja2	3.67063e-05	2.21369e-05	3.54308e-05	2.90015e-05	3.00442e-05	3.63462e-05	3.26701e-05	3.59152e-05	3.67919e-05	3.42387e-05	2.08365e-05	4.1974e-05	0.000392093	12	DnaJ homolog subfamily A member 2 OS=Rattus norvegicus OX=10116 GN=Dnaja2 PE=1 SV=1
Prefrontal-cortex	Q9JMJ4	Prpf19	5.12629e-07	2.01343e-06	8.25069e-07	4.83128e-07	1.67625e-06	2.1535e-06	8.91714e-06	3.84519e-06	2.05359e-06	9.30812e-07	3.69379e-06	2.78465e-06	2.98892e-05	12	Pre-mRNA-processing factor 19 OS=Rattus norvegicus OX=10116 GN=Prpf19 PE=1 SV=2
Prefrontal-cortex	P54313	Gnb2	7.6129e-05	0.000201123	0.000160037	4.10408e-05	5.07571e-05	6.70491e-05	0.000192962	5.12664e-05	5.95903e-05	9.86112e-05	0.000120932	9.41616e-05	0.00121366	12	Guanine nucleotide-binding protein G(I)/G(S)/G(T) subunit beta-2 OS=Rattus norvegicus OX=10116 GN=Gnb2 PE=1 SV=4
Prefrontal-cortex	P29315	Rnh1	8.42948e-05	3.37745e-05	9.81279e-06	1.78251e-05	2.08161e-05	2.11978e-05	1.34145e-05	4.25836e-05	3.70403e-05	3.54576e-05	3.98808e-05	3.70362e-05	0.000393134	12	Ribonuclease inhibitor OS=Rattus norvegicus OX=10116 GN=Rnh1 PE=1 SV=2
Prefrontal-cortex	O35796	C1qbp	5.45667e-05	4.50038e-05	3.27074e-05	3.88788e-05	3.02433e-05	2.86927e-05	2.72527e-05	3.87183e-05	5.39458e-05	3.23864e-05	3.8983e-05	4.25177e-05	0.000463897	12	Complement component 1 Q subcomponent-binding protein, mitochondrial OS=Rattus norvegicus OX=10116 GN=C1qbp PE=1 SV=2
Prefrontal-cortex	P11884	Aldh2	0.000138728	8.92365e-05	0.000100952	9.59675e-05	6.71414e-05	8.24602e-05	8.62664e-05	9.22573e-05	9.7812e-05	6.48218e-05	0.000108155	7.90733e-05	0.00110287	12	Aldehyde dehydrogenase, mitochondrial OS=Rattus norvegicus OX=10116 GN=Aldh2 PE=1 SV=1
Prefrontal-cortex	P70470	Lypla1	9.09974e-06		6.98445e-07		9.56875e-06			2.616e-06		1.46887e-06	2.30764e-06		2.57595e-05	6	Acyl-protein thioesterase 1 OS=Rattus norvegicus OX=10116 GN=Lypla1 PE=1 SV=1
Prefrontal-cortex	Q6Q629	Dpp10		5.18226e-05	1.80282e-05	2.36472e-06	2.59403e-06	2.2146e-06	1.1303e-05	1.90748e-06	3.65471e-07	4.9873e-06	4.14162e-06	9.14941e-07	0.000100644	11	Inactive dipeptidyl peptidase 10 OS=Rattus norvegicus OX=10116 GN=Dpp10 PE=1 SV=1
Prefrontal-cortex	P40112	Psmb3	3.21178e-05	3.31262e-05	3.91107e-05	1.89195e-05	2.30997e-05	3.6579e-05	2.5836e-05	3.36284e-05	3.41143e-05	4.13253e-05	5.07425e-05	5.0564e-05	0.000419163	12	Proteasome subunit beta type-3 OS=Rattus norvegicus OX=10116 GN=Psmb3 PE=1 SV=1
Prefrontal-cortex	Q6AY09	Hnrnph2	5.95875e-06	8.30551e-06	1.38905e-05	1.04153e-05	1.73387e-05	2.82271e-05	2.65524e-05	1.98473e-05	7.60414e-06	2.7302e-05	1.59889e-05	1.36166e-05	0.000195047	12	Heterogeneous nuclear ribonucleoprotein H2 OS=Rattus norvegicus OX=10116 GN=Hnrnph2 PE=1 SV=1
Prefrontal-cortex	Q8R491	Ehd3	7.38994e-05	4.62189e-05	7.42616e-05	5.215e-05	6.0698e-05	4.92715e-05	7.30105e-05	6.04797e-05	7.43293e-05	0.000101202	9.89443e-05	0.000102299	0.000866764	12	EH domain-containing protein 3 OS=Rattus norvegicus OX=10116 GN=Ehd3 PE=1 SV=2
Prefrontal-cortex	P47727	Cbr1	6.75753e-05	3.3703e-05	6.92222e-05	5.77172e-05	8.94556e-05	8.61648e-05	6.01224e-05	0.000100224	7.45698e-05	8.35622e-05	8.62304e-05	0.000117248	0.000925794	12	Carbonyl reductase [NADPH] 1 OS=Rattus norvegicus OX=10116 GN=Cbr1 PE=1 SV=2
Prefrontal-cortex	F1M386	Rapgef2	6.58458e-06	1.82879e-05	4.8132e-06	4.15288e-06	4.29934e-06	4.11632e-06	1.02102e-05	5.70142e-06	1.12062e-05	9.67534e-06	5.3912e-06	9.87047e-06	9.4309e-05	12	Rap guanine nucleotide exchange factor 2 OS=Rattus norvegicus OX=10116 GN=Rapgef2 PE=1 SV=2
Prefrontal-cortex	P26772	Hspe1	0.000819758	0.000540438	0.000646101	0.000497648	0.000473081	0.000561853	0.000417758	0.000656873	0.000662314	0.000658658	0.000873544	0.000828951	0.00763698	12	10 kDa heat shock protein, mitochondrial OS=Rattus norvegicus OX=10116 GN=Hspe1 PE=1 SV=3
Prefrontal-cortex	O08557	Ddah1	0.000125113	9.27488e-05	0.000142263	0.000104696	0.000173591	0.000160505	0.000159341	0.000223213	0.000113229	0.000234066	0.000214255	0.000150724	0.00189375	12	N(G),N(G)-dimethylarginine dimethylaminohydrolase 1 OS=Rattus norvegicus OX=10116 GN=Ddah1 PE=1 SV=3
Prefrontal-cortex	Q5BK56	Gstm4	6.89844e-06	4.81892e-06	3.63137e-06	3.91737e-06	6.68248e-06	8.32843e-06	3.8033e-06	5.68096e-06	4.86729e-06	1.00955e-05	1.59207e-05	6.34243e-06	8.09872e-05	12	Glutathione S-transferase Mu 4 OS=Rattus norvegicus OX=10116 GN=Gstm4 PE=2 SV=1
Prefrontal-cortex	Q5M7A7	Cnrip1	0.000171293	0.000127228	0.000189865	0.000140171	0.0001348	0.000167949	0.000133091	0.000190791	9.19092e-05	0.000150099	0.00020266	0.000103163	0.00180302	12	CB1 cannabinoid receptor-interacting protein 1 OS=Rattus norvegicus OX=10116 GN=Cnrip1 PE=1 SV=1
Prefrontal-cortex	P13471	Rps14	1.84334e-05	2.82628e-05	3.14437e-05	1.50194e-05	2.34906e-05	3.2854e-05	4.20573e-05	2.97349e-05	2.44391e-05	4.02463e-05	4.39388e-05	3.6357e-05	0.000366277	12	40S ribosomal protein S14 OS=Rattus norvegicus OX=10116 GN=Rps14 PE=2 SV=3
Prefrontal-cortex	Q07205	Eif5	2.21647e-05	2.04454e-05	1.46446e-05	1.77386e-05	1.78465e-05	2.28908e-05	1.87474e-05	7.84899e-06	3.48586e-05	2.79489e-05	1.86796e-05	2.96452e-05	0.00025346	12	Eukaryotic translation initiation factor 5 OS=Rattus norvegicus OX=10116 GN=Eif5 PE=1 SV=1
Prefrontal-cortex	P61265	Stx1b	0.000284621	0.000788937	0.00068998	0.00025739	0.000361522	0.000417857	0.000811102	0.000405472	0.000360763	0.000497502	0.000494529	0.000357166	0.00572684	12	Syntaxin-1B OS=Rattus norvegicus OX=10116 GN=Stx1b PE=1 SV=1
Prefrontal-cortex	P49242	Rps3a	6.31752e-05	7.97802e-05	9.52283e-05	6.2677e-05	4.36359e-05	0.000114271	0.000100733	6.23004e-05	4.71136e-05	0.000153927	0.000127835	0.000103831	0.00105451	12	40S ribosomal protein S3a OS=Rattus norvegicus OX=10116 GN=Rps3a PE=1 SV=2
Prefrontal-cortex	Q63083	Nucb1	2.16844e-06	1.89136e-06	3.45016e-06	3.3251e-06	4.70675e-06	2.16548e-06	3.69596e-06	7.21183e-06	5.04068e-06	4.61101e-06	5.9121e-06	1.23048e-05	5.64836e-05	12	Nucleobindin-1 OS=Rattus norvegicus OX=10116 GN=Nucb1 PE=1 SV=1
Prefrontal-cortex	Q80Z30	Ppm1e	3.61589e-05	2.32268e-05	1.52681e-05	1.62676e-05	2.81281e-05	5.97989e-05	3.84567e-05	6.35547e-05	6.00103e-05	5.82357e-05	4.45709e-05	7.12584e-05	0.000514935	12	Protein phosphatase 1E OS=Rattus norvegicus OX=10116 GN=Ppm1e PE=1 SV=1
Prefrontal-cortex	Q63413	Ddx39b	1.88601e-05	2.09019e-05	3.65868e-05	7.92092e-06	2.23462e-05	3.28405e-05	3.22376e-05	2.68332e-05	2.19884e-05	3.29058e-05	3.606e-05	3.28914e-05	0.000322373	12	Spliceosome RNA helicase Ddx39b OS=Rattus norvegicus OX=10116 GN=Ddx39b PE=2 SV=3
Prefrontal-cortex	Q99ML5	Pcyox1	1.89404e-05	5.41658e-05	3.70674e-05	3.06678e-05	1.28487e-05	1.67579e-05	4.42409e-05	1.16829e-05	4.23307e-06	2.20981e-05	2.51508e-05	5.86189e-06	0.000283716	12	Prenylcysteine oxidase OS=Rattus norvegicus OX=10116 GN=Pcyox1 PE=1 SV=1
Prefrontal-cortex	P02401	Rplp2	8.00711e-05	0.000102528	7.97761e-05	4.09004e-05	6.94477e-05	8.45549e-05	0.000127719	8.36091e-05	8.74826e-05	8.25591e-05	8.5924e-05	0.000111599	0.00103617	12	60S acidic ribosomal protein P2 OS=Rattus norvegicus OX=10116 GN=Rplp2 PE=1 SV=2
Prefrontal-cortex	Q9EQS0	Taldo1	0.000114116	6.74967e-05	0.000162929	8.88091e-05	0.000121656	0.000139104	0.000159868	0.000159709	0.000142599	0.000169066	0.000176375	0.000161905	0.00166363	12	Transaldolase OS=Rattus norvegicus OX=10116 GN=Taldo1 PE=1 SV=2
Prefrontal-cortex	O55043	Arhgef7	4.98377e-06	3.74035e-06	2.07334e-06	4.37732e-06	6.35085e-06	8.16377e-06	3.53843e-06	6.52005e-06	1.98871e-06	7.573e-06	3.73645e-07	3.85752e-06	5.35407e-05	12	Rho guanine nucleotide exchange factor 7 OS=Rattus norvegicus OX=10116 GN=Arhgef7 PE=1 SV=1
Prefrontal-cortex	Q76EQ0	Srr	1.74028e-05	2.36734e-05	1.38952e-05	2.27538e-05	1.58867e-05	2.43627e-05	1.28814e-05	1.52698e-05	2.80889e-05	1.31542e-05	1.00165e-05	2.55631e-05	0.000222948	12	Serine racemase OS=Rattus norvegicus OX=10116 GN=Srr PE=1 SV=1
Prefrontal-cortex	Q6P7Q4	Glo1	0.000234261	0.000194042	8.11482e-05	0.00010243	8.93147e-05	0.000103808	3.16577e-05	8.96023e-05	0.000146642	0.000101486	0.00012184	0.000217506	0.00151374	12	Lactoylglutathione lyase OS=Rattus norvegicus OX=10116 GN=Glo1 PE=1 SV=3
Prefrontal-cortex	D3ZAA9	Mpp2	8.50711e-05	0.000126334	9.08121e-05	2.23068e-05	3.85464e-05	3.2785e-05	4.98672e-05	2.93111e-05	2.01026e-05	2.91348e-05	4.44479e-05	1.58464e-05	0.000584565	12	MAGUK p55 subfamily member 2 OS=Rattus norvegicus OX=10116 GN=Mpp2 PE=1 SV=2
Prefrontal-cortex	P23514	Copb1	1.1714e-05	4.90598e-06	3.66435e-06	3.76394e-06	4.29668e-06	7.32067e-06	9.48646e-06	9.10387e-06	1.3166e-05	1.51885e-05	1.55728e-05	1.47818e-05	0.000112965	12	Coatomer subunit beta OS=Rattus norvegicus OX=10116 GN=Copb1 PE=1 SV=1
Prefrontal-cortex	P24268	Ctsd	9.17119e-05	6.60874e-05	6.19177e-05	5.16824e-05	8.42262e-05	0.000115573	9.16971e-05	0.000122095	0.000150687	0.000155115	0.000138993	0.000166758	0.00129654	12	Cathepsin D OS=Rattus norvegicus OX=10116 GN=Ctsd PE=1 SV=1
Prefrontal-cortex	Q9QZA2	Pdcd6ip	2.10164e-05	1.17292e-05	2.39714e-05	0.000129382	3.84922e-05	4.08346e-05	2.51173e-05	2.28016e-05	2.44292e-05	3.2283e-05	3.25137e-05	1.55521e-05	0.000418123	12	Programmed cell death 6-interacting protein OS=Rattus norvegicus OX=10116 GN=Pdcd6ip PE=1 SV=2
Prefrontal-cortex	Q5U1Z0	Rab3gap2	8.94875e-06	3.6605e-06	3.07239e-06	3.72965e-06	2.85262e-06	3.31196e-06	3.87693e-06	3.47824e-05	2.78659e-06	6.57778e-06	7.797e-06	6.74074e-06	8.81373e-05	12	Rab3 GTPase-activating protein non-catalytic subunit OS=Rattus norvegicus OX=10116 GN=Rab3gap2 PE=1 SV=2
Prefrontal-cortex	O54975	Xpnpep1	7.84516e-05	4.16477e-05	4.86101e-05	3.73963e-05	4.7269e-05	6.49711e-05	2.18671e-05	4.83698e-05	3.93389e-05	3.9537e-05	7.98043e-05	5.44704e-05	0.000601733	12	Xaa-Pro aminopeptidase 1 OS=Rattus norvegicus OX=10116 GN=Xpnpep1 PE=1 SV=1
Prefrontal-cortex	Q4KLP0	Dhtkd1			2.57266e-06		1.95046e-06	2.03541e-06		1.23077e-06		1.04702e-06	2.49997e-06		1.13363e-05	6	Probable 2-oxoglutarate dehydrogenase E1 component DHKTD1, mitochondrial OS=Rattus norvegicus OX=10116 GN=Dhtkd1 PE=2 SV=1
Prefrontal-cortex	Q63564	Sv2b	0.000165673	0.000583223	0.000315038	0.000114694	0.000153941	0.000138557	0.000285178	0.000148391	0.000110298	0.000218049	0.000153401	0.000164398	0.00255084	12	Synaptic vesicle glycoprotein 2B OS=Rattus norvegicus OX=10116 GN=Sv2b PE=1 SV=1
Prefrontal-cortex	P62824	Rab3c	4.85603e-05	6.18228e-05	8.47142e-05	0.000121893	0.000162684	0.000137696	8.45341e-05	6.01505e-05	4.77418e-05	7.36134e-05	7.34857e-05	4.98544e-05	0.00100675	12	Ras-related protein Rab-3C OS=Rattus norvegicus OX=10116 GN=Rab3c PE=1 SV=1
Prefrontal-cortex	Q6XVN8	Map1lc3a	4.3131e-05	6.35327e-05	6.18596e-05	2.79259e-05	5.06959e-05	3.37641e-05		4.78354e-05	3.39528e-05	6.46158e-05	5.02777e-05	4.1635e-05	0.000519226	11	Microtubule-associated proteins 1A/1B light chain 3A OS=Rattus norvegicus OX=10116 GN=Map1lc3a PE=1 SV=1
Prefrontal-cortex	Q5U1X1	Rexo2	1.87538e-06	0.00109423		1.9818e-06	0.000172753	6.14211e-06	1.38867e-06	7.11259e-06	0.000282729	0.000295105	1.51891e-06	5.0392e-06	0.00186987	11	Oligoribonuclease, mitochondrial OS=Rattus norvegicus OX=10116 GN=Rexo2 PE=2 SV=1
Prefrontal-cortex	P35565	Canx	5.88665e-05	0.000242476	0.000212538	6.58471e-05	0.000105097	6.85636e-05	0.000302273	3.4877e-05	4.48683e-05	0.000115583	0.000109884	4.12086e-05	0.00140208	12	Calnexin OS=Rattus norvegicus OX=10116 GN=Canx PE=1 SV=1
Prefrontal-cortex	P62425	Rpl7a	2.22529e-05	5.94353e-05	2.54128e-05	1.77278e-05	3.77489e-05	3.37265e-05	7.77951e-05	3.25436e-05	5.32799e-05	6.1117e-05	7.01344e-05	6.87279e-05	0.000559902	12	60S ribosomal protein L7a OS=Rattus norvegicus OX=10116 GN=Rpl7a PE=1 SV=2
Prefrontal-cortex	Q3ZBA0	Tecpr1	4.33022e-06	4.2341e-06	3.11244e-06	3.69528e-06	5.16568e-06	1.93994e-06	5.95698e-06	5.03237e-06	6.82362e-06	3.96577e-06	7.47127e-06	4.18341e-06	5.59111e-05	12	Tectonin beta-propeller repeat-containing protein 1 OS=Rattus norvegicus OX=10116 GN=Tecpr1 PE=2 SV=1
Prefrontal-cortex	P04905	Gstm1	0.000228816	0.000158789	0.000217367	0.000172468	0.000216329	0.000258277	0.00015978	0.000221019	0.000170842	0.000147179	0.000244909	0.000164134	0.00235991	12	Glutathione S-transferase Mu 1 OS=Rattus norvegicus OX=10116 GN=Gstm1 PE=1 SV=2
Prefrontal-cortex	P14668	Anxa5	1.53211e-05	0.000183195	0.000134323	7.42071e-05	3.06449e-05	5.29862e-05	0.000155298	7.40029e-05	1.54091e-05	7.68749e-05	8.75111e-05	5.22182e-05	0.000951992	12	Annexin A5 OS=Rattus norvegicus OX=10116 GN=Anxa5 PE=1 SV=3
Prefrontal-cortex	O88794	Pnpo	1.1482e-05	6.02133e-06	7.36412e-06	6.74736e-06	6.55278e-06	1.19052e-05	3.58966e-06	1.29003e-05	9.34709e-06	5.24464e-06	1.0521e-05	1.27675e-05	0.000104443	12	Pyridoxine-5'-phosphate oxidase OS=Rattus norvegicus OX=10116 GN=Pnpo PE=1 SV=1
Prefrontal-cortex	P62718	Rpl18a	3.18771e-05	6.124e-05	2.18924e-05	1.76417e-05	2.06467e-05	2.04833e-05	5.5158e-05	2.79961e-05	4.10539e-05	3.80691e-05	5.18928e-05	6.12937e-05	0.000449245	12	60S ribosomal protein L18a OS=Rattus norvegicus OX=10116 GN=Rpl18a PE=2 SV=1
Prefrontal-cortex	P54290	Cacna2d1	1.00703e-05	0.000107252	5.55349e-05	7.05544e-06	1.91597e-05	7.38476e-06	4.54683e-05		5.09684e-06	2.16262e-05	1.33671e-05	2.79741e-06	0.000294813	11	Voltage-dependent calcium channel subunit alpha-2/delta-1 OS=Rattus norvegicus OX=10116 GN=Cacna2d1 PE=1 SV=1
Prefrontal-cortex	D3ZVR7	Prxl2b	5.86133e-07	5.99957e-07		1.82563e-06	8.96388e-07			8.45899e-07	4.29584e-07		1.25049e-06	1.76545e-06	8.19953e-06	8	Prostamide/prostaglandin F synthase OS=Rattus norvegicus OX=10116 GN=Prxl2b PE=3 SV=1
Prefrontal-cortex	F1LU71	Auh	6.29739e-05	6.06723e-05	9.62504e-05	5.69155e-05	3.57869e-05	7.24565e-05	3.98962e-05	9.3716e-05	7.42058e-05	5.47262e-05	9.93457e-05	6.17817e-05	0.000808727	12	Methylglutaconyl-CoA hydratase, mitochondrial OS=Rattus norvegicus OX=10116 GN=Auh PE=1 SV=2
Prefrontal-cortex	P20595	Gucy1b1	4.96759e-06	1.06667e-05	3.95142e-06	5.39425e-06	1.15017e-05	8.22735e-07	8.47959e-06	7.18097e-06	5.75316e-06	5.93847e-06	1.51775e-05	7.14921e-06	8.69833e-05	12	Guanylate cyclase soluble subunit beta-1 OS=Rattus norvegicus OX=10116 GN=Gucy1b1 PE=1 SV=2
Prefrontal-cortex	Q9ESH6	Glrx	9.49027e-06	7.14062e-06	3.83182e-05	4.03394e-06	7.05243e-06	4.95658e-06	7.35626e-06	9.67765e-06	9.13464e-06	1.01807e-05	5.59442e-06	1.02063e-05	0.000123142	12	Glutaredoxin-1 OS=Rattus norvegicus OX=10116 GN=Glrx PE=3 SV=3
Prefrontal-cortex	P62755	Rps6	4.81648e-05	4.33441e-05	5.87944e-05	2.99606e-05	4.49299e-05	6.39926e-05	6.78244e-05	3.49814e-05	6.26798e-05	6.00056e-05	7.43855e-05	6.53788e-05	0.000654442	12	40S ribosomal protein S6 OS=Rattus norvegicus OX=10116 GN=Rps6 PE=1 SV=1
Prefrontal-cortex	P00762	Prss1	0.000405531	0.000345475	0.000552471	0.000397984	0.000250983	0.000381317	0.000228149	0.000433736	0.000244464	0.000288771	0.000181693	0.000274564	0.00398514	12	Serine protease 1 OS=Rattus norvegicus OX=10116 GN=Prss1 PE=1 SV=1
Prefrontal-cortex	P04639	Apoa1	6.89557e-06	1.18426e-05	3.8859e-06	8.64601e-06		7.37842e-06	2.21926e-05	2.41275e-06	3.57238e-06		4.15008e-05	2.42842e-06	0.000110755	10	Apolipoprotein A-I OS=Rattus norvegicus OX=10116 GN=Apoa1 PE=1 SV=2
Prefrontal-cortex	O08662	Pi4ka	9.44949e-05	2.45886e-05	6.65633e-05	3.83381e-05	6.60807e-06	7.55908e-06	6.947e-05	5.60514e-05	1.60792e-05	2.51346e-05	3.82246e-05	2.34188e-05	0.000466531	12	Phosphatidylinositol 4-kinase alpha OS=Rattus norvegicus OX=10116 GN=Pi4ka PE=1 SV=2
Prefrontal-cortex	Q566C7	Nudt3	2.17469e-05	1.598e-05	1.57641e-05	1.75167e-05	1.95677e-05	1.70505e-05	1.79545e-05	9.23027e-06	1.66018e-05	1.12184e-05	1.59112e-05	1.82291e-05	0.000196771	12	Diphosphoinositol polyphosphate phosphohydrolase 1 OS=Rattus norvegicus OX=10116 GN=Nudt3 PE=1 SV=1
Prefrontal-cortex	Q6DGG0	Ppid	0.000180359	9.16532e-05	0.000118293	5.51147e-05	9.20535e-05	0.000100898	9.55e-05	0.000173353	0.000151529	0.000119085	0.000133416	0.000196252	0.00150751	12	Peptidyl-prolyl cis-trans isomerase D OS=Rattus norvegicus OX=10116 GN=Ppid PE=1 SV=3
Prefrontal-cortex	Q03114	Cdk5	3.47151e-05	3.1032e-05	1.62757e-05	2.57728e-05	2.62785e-05	2.33211e-05	2.0013e-05	3.42611e-05	3.05442e-05	2.84154e-05	2.7388e-05	3.78645e-05	0.000335881	12	Cyclin-dependent-like kinase 5 OS=Rattus norvegicus OX=10116 GN=Cdk5 PE=1 SV=1
Prefrontal-cortex	P62703	Rps4x	8.43673e-05	0.000161595	0.000145285	4.8592e-05	5.77022e-05	9.91484e-05	0.000171716	7.59195e-05	9.2907e-05	0.000129114	0.000149772	0.000101803	0.00131792	12	40S ribosomal protein S4, X isoform OS=Rattus norvegicus OX=10116 GN=Rps4x PE=2 SV=2
Prefrontal-cortex	O08700	Vps45	3.42203e-06	2.00548e-05	1.69446e-06	1.49777e-06	1.748e-06	8.2103e-07	7.02149e-06	3.36137e-06	4.75734e-06	5.94837e-06	5.20805e-06	8.51442e-06	6.40491e-05	12	Vacuolar protein sorting-associated protein 45 OS=Rattus norvegicus OX=10116 GN=Vps45 PE=1 SV=1
Prefrontal-cortex	Q71UE8	Nedd8	6.3139e-05	3.06877e-05	2.68213e-05	1.76908e-05	3.24805e-05	3.58333e-05	3.71016e-05	3.99605e-05	3.04562e-05	4.10797e-05	3.90636e-05	4.52952e-05	0.000439609	12	NEDD8 OS=Rattus norvegicus OX=10116 GN=Nedd8 PE=1 SV=1
Prefrontal-cortex	P68101	Eif2s1	7.46313e-06	6.81069e-06	8.89229e-06	4.24009e-06	1.17102e-05	1.3811e-05	2.18212e-05	2.06182e-05	9.6281e-06	2.74161e-05	1.95609e-05	1.45888e-05	0.000166561	12	Eukaryotic translation initiation factor 2 subunit 1 OS=Rattus norvegicus OX=10116 GN=Eif2s1 PE=1 SV=2
Prefrontal-cortex	Q7TP98	Ilf2	4.81045e-05	7.68555e-05	8.72243e-06	5.21338e-06	1.16028e-05	3.18563e-05	3.37402e-05	1.0818e-05	2.7481e-05	4.7606e-05	4.11479e-05	5.05939e-05	0.000393742	12	Interleukin enhancer-binding factor 2 OS=Rattus norvegicus OX=10116 GN=Ilf2 PE=2 SV=1
Prefrontal-cortex	P19686	Gucy1a1				1.53728e-06	8.59668e-07	5.51748e-07	1.03034e-06	2.21428e-06	1.12594e-06	8.15894e-07	2.67573e-06		1.08109e-05	8	Guanylate cyclase soluble subunit alpha-1 OS=Rattus norvegicus OX=10116 GN=Gucy1a1 PE=1 SV=1
Prefrontal-cortex	Q02356	Ampd2	6.98089e-06	7.43402e-06	1.37401e-05	1.95133e-05	7.63128e-06	1.18973e-05	1.00884e-05	4.86303e-06	4.74852e-06	1.07145e-05	1.48545e-05	6.1724e-06	0.000118638	12	AMP deaminase 2 OS=Rattus norvegicus OX=10116 GN=Ampd2 PE=1 SV=2
Prefrontal-cortex	O35077	Gpd1	1.89612e-05	3.20759e-06	5.19872e-06	8.33441e-06	3.67161e-05	6.07974e-05	8.60426e-05	0.000709372	0.000186874	6.07653e-05	0.00015699	0.000154295	0.00148755	12	Glycerol-3-phosphate dehydrogenase [NAD(+)], cytoplasmic OS=Rattus norvegicus OX=10116 GN=Gpd1 PE=1 SV=4
Prefrontal-cortex	Q4KM49	Yars1	2.55854e-05	1.33303e-05	1.35595e-05	1.98941e-05	1.92423e-05	3.66366e-05	1.39005e-05	1.92007e-05	2.85435e-05	1.91633e-05	2.33859e-05	3.52124e-05	0.000267655	12	Tyrosine--tRNA ligase, cytoplasmic OS=Rattus norvegicus OX=10116 GN=Yars1 PE=2 SV=3
Prefrontal-cortex	P97697	Impa1	0.000101304	5.62882e-05	0.000108366	0.00010214	0.000129897	0.000152217	9.57343e-05	0.000161281	0.000114485	0.000129667	0.000152315	0.000186792	0.00149049	12	Inositol monophosphatase 1 OS=Rattus norvegicus OX=10116 GN=Impa1 PE=1 SV=2
Prefrontal-cortex	P17425	Hmgcs1	1.97656e-05	7.27473e-06	2.50711e-05	1.40379e-05	2.84585e-05	1.61347e-05	7.56153e-06	4.39135e-06	6.62361e-06	2.84694e-05	1.70002e-05	5.94815e-06	0.000180737	12	Hydroxymethylglutaryl-CoA synthase, cytoplasmic OS=Rattus norvegicus OX=10116 GN=Hmgcs1 PE=1 SV=1
Prefrontal-cortex	Q66HA6	Arl8b	2.93881e-05	6.77032e-05	7.9091e-05	3.31112e-05	4.10134e-05	2.41289e-05	7.95854e-05	3.43538e-05	2.2458e-05	3.59009e-05	6.1817e-05	3.20579e-05	0.000540609	12	ADP-ribosylation factor-like protein 8B OS=Rattus norvegicus OX=10116 GN=Arl8b PE=2 SV=1
Prefrontal-cortex	Q8CG45	Akr7a2	7.90208e-06	9.19007e-06	9.15766e-06	3.17107e-05	1.33432e-05	1.8257e-05	1.25153e-05	4.20902e-05	1.20554e-05	1.27787e-05	1.89721e-05	1.30482e-05	0.000201021	12	Aflatoxin B1 aldehyde reductase member 2 OS=Rattus norvegicus OX=10116 GN=Akr7a2 PE=1 SV=2
Prefrontal-cortex	Q66H61	Qars1				3.13576e-07	1.93357e-06	2.41508e-06	1.13551e-06	1.59349e-06	7.40314e-07	2.7301e-06	7.64591e-06	2.01616e-06	2.05237e-05	9	Glutamine--tRNA ligase OS=Rattus norvegicus OX=10116 GN=Qars1 PE=1 SV=1
Prefrontal-cortex	Q63009	Prmt1		8.94678e-06	6.93138e-06	1.20546e-06	3.47287e-06				8.76133e-06	8.22308e-06	4.67929e-06	4.50397e-06	4.67241e-05	8	Protein arginine N-methyltransferase 1 OS=Rattus norvegicus OX=10116 GN=Prmt1 PE=1 SV=1
Prefrontal-cortex	P24054	Sparcl1	1.25537e-06		5.52326e-05	1.45305e-05	4.6064e-05	2.40223e-05		1.94404e-05	3.63571e-05	4.60951e-05	4.03963e-05	2.02334e-05	0.000303627	10	SPARC-like protein 1 OS=Rattus norvegicus OX=10116 GN=Sparcl1 PE=1 SV=1
Prefrontal-cortex	P04644	Rps17	1.76707e-05	2.94886e-05		1.05421e-05	1.63763e-05	3.383e-05	3.6908e-05	1.67489e-05	1.38694e-05	1.97734e-05	2.45367e-05	3.32236e-05	0.000252968	11	40S ribosomal protein S17 OS=Rattus norvegicus OX=10116 GN=Rps17 PE=1 SV=3
Prefrontal-cortex	Q64361	Lxn	3.02412e-05		1.80909e-05	1.90954e-05	1.17941e-05	2.52966e-05	1.52781e-05	2.97817e-05	4.4708e-06	1.71349e-05	1.79615e-05	1.72033e-05	0.000206348	11	Latexin OS=Rattus norvegicus OX=10116 GN=Lxn PE=1 SV=1
Prefrontal-cortex	Q62718	Ntm	9.13034e-07	0.000111789	8.60975e-05	1.30607e-05	3.25129e-05	1.65381e-05	6.3606e-05	1.7037e-06	1.12189e-05	2.20771e-05	2.20622e-05	2.9598e-06	0.000384539	12	Neurotrimin OS=Rattus norvegicus OX=10116 GN=Ntm PE=1 SV=1
Prefrontal-cortex	Q8K3X8	Hsbp1	2.33677e-05	1.60857e-05	3.90717e-05	2.565e-05	2.2175e-05	1.87648e-05	2.47333e-05	3.22228e-05	2.99017e-05	4.09573e-05	1.73729e-05	1.80847e-05	0.000308388	12	Heat shock factor-binding protein 1 OS=Rattus norvegicus OX=10116 GN=Hsbp1 PE=3 SV=1
Prefrontal-cortex	P31399	Atp5pd	2.25572e-05	4.65515e-05	4.2568e-05	4.4851e-05	2.69342e-05	1.012e-05	2.84127e-05		8.82143e-07	4.64954e-05	1.7708e-05		0.00028708	10	ATP synthase subunit d, mitochondrial OS=Rattus norvegicus OX=10116 GN=Atp5pd PE=1 SV=3
Prefrontal-cortex	O35180	Sh3gl3	4.05926e-06	8.29342e-06	1.45808e-06	3.35344e-06	3.72391e-06	2.62767e-06	9.74245e-06	1.30517e-05	6.94239e-06	9.85408e-06	1.51302e-05	1.54675e-05	9.37041e-05	12	Endophilin-A3 OS=Rattus norvegicus OX=10116 GN=Sh3gl3 PE=1 SV=2
Prefrontal-cortex	Q2TL32	Ubr4	2.29014e-06	1.99956e-06	2.14379e-06	3.53905e-05	2.3321e-06	1.24415e-06	4.75015e-06	6.79805e-06	1.14982e-05	3.6454e-06	7.26288e-06	8.43676e-06	8.77917e-05	12	E3 ubiquitin-protein ligase UBR4 OS=Rattus norvegicus OX=10116 GN=Ubr4 PE=1 SV=2
Prefrontal-cortex	B1WC61	Acad9	3.59729e-05	1.13782e-05	2.50484e-05	2.18326e-05	5.05227e-06	4.24639e-06	4.69052e-06	2.16674e-05	1.15176e-05	1.44551e-05	2.70881e-05	9.67323e-06	0.000192623	12	Complex I assembly factor ACAD9, mitochondrial OS=Rattus norvegicus OX=10116 GN=Acad9 PE=1 SV=1
Prefrontal-cortex	Q3KRD5	Tomm34	1.25925e-06	1.73286e-06	1.87983e-05	1.04533e-05	1.53151e-05	1.22164e-05	1.22193e-05	7.08979e-06	1.19401e-05	8.44575e-06	1.12796e-05	6.96491e-06	0.000117715	12	Mitochondrial import receptor subunit TOM34 OS=Rattus norvegicus OX=10116 GN=Tomm34 PE=1 SV=1
Prefrontal-cortex	P83941	Eloc	1.97834e-05	1.23784e-06	2.17772e-05	2.6123e-05	2.96061e-05	3.46209e-05	2.68622e-05	3.94446e-05	2.1992e-05	3.59351e-05	3.7277e-05	2.88565e-05	0.000323516	12	Elongin-C OS=Rattus norvegicus OX=10116 GN=Eloc PE=1 SV=1
Prefrontal-cortex	Q5FVI3	Lrrc57	4.45598e-06	3.23992e-05	1.8072e-05	7.11933e-06	3.18166e-06	6.71627e-07	7.16349e-06	9.08579e-07		4.84709e-06	5.07398e-06		8.3893e-05	10	Leucine-rich repeat-containing protein 57 OS=Rattus norvegicus OX=10116 GN=Lrrc57 PE=2 SV=1
Prefrontal-cortex	P14882	Pcca	1.11808e-06		4.25782e-06	1.77009e-06	9.60891e-07	3.11873e-06	1.41754e-06			1.92366e-06	5.76758e-06	1.64908e-06	2.19835e-05	9	Propionyl-CoA carboxylase alpha chain, mitochondrial OS=Rattus norvegicus OX=10116 GN=Pcca PE=1 SV=3
Prefrontal-cortex	Q6AY86	Vps26a	1.43274e-05	6.38608e-06	2.71301e-06	6.14452e-06	3.88839e-06	7.48265e-06	6.19362e-06	1.60911e-05	1.61051e-05	9.72888e-06	1.44044e-05	1.537e-05	0.000118835	12	Vacuolar protein sorting-associated protein 26A OS=Rattus norvegicus OX=10116 GN=Vps26a PE=1 SV=1
Prefrontal-cortex	P62902	Rpl31	2.78243e-05	3.98855e-05	3.60108e-05	1.51302e-05	2.27296e-05	3.26414e-05	2.13953e-05	1.40446e-05	2.4337e-05	3.01367e-05	3.64811e-05	3.23291e-05	0.000332946	12	60S ribosomal protein L31 OS=Rattus norvegicus OX=10116 GN=Rpl31 PE=2 SV=1
Prefrontal-cortex	P83732	Rpl24	6.82316e-05	0.000107895	4.79364e-05	1.58447e-05	2.11898e-05	3.15005e-05	8.33201e-05	5.29765e-05	6.47311e-05	6.54026e-05	5.59658e-05	8.56504e-05	0.000700644	12	60S ribosomal protein L24 OS=Rattus norvegicus OX=10116 GN=Rpl24 PE=2 SV=1
Prefrontal-cortex	P31000	Vim	1.62221e-05	3.06818e-05	1.16194e-05	3.44152e-05	7.86776e-06	1.89273e-05	4.91841e-05	0.000149648	3.53044e-05	0.000137626	0.00044157	6.92182e-05	0.00100228	12	Vimentin OS=Rattus norvegicus OX=10116 GN=Vim PE=1 SV=2
Prefrontal-cortex	P62268	Rps23	1.46722e-05	2.17241e-05	1.20846e-05		5.31489e-06	1.21904e-05	2.02388e-05	1.25399e-05	1.72541e-05	2.17938e-05	2.78439e-05	2.7048e-05	0.000192705	11	40S ribosomal protein S23 OS=Rattus norvegicus OX=10116 GN=Rps23 PE=1 SV=3
Prefrontal-cortex	Q91XU8	Cds2	1.0169e-06	5.33601e-06	2.43374e-06		2.85029e-07	4.03282e-07	1.51305e-05			6.51751e-06	3.27366e-06	1.79247e-07	3.45759e-05	9	Phosphatidate cytidylyltransferase 2 OS=Rattus norvegicus OX=10116 GN=Cds2 PE=1 SV=1
Prefrontal-cortex	P26817	Grk2	5.1123e-06	4.7795e-06	1.43187e-06	5.33433e-06	2.83185e-06			2.67883e-06		2.04081e-06	5.95203e-06	2.07483e-05	5.09098e-05	9	Beta-adrenergic receptor kinase 1 OS=Rattus norvegicus OX=10116 GN=Grk2 PE=1 SV=1
Prefrontal-cortex	Q5U211	Snx3	4.18635e-05	7.22855e-05	2.27842e-05	2.69993e-05	2.44791e-05	2.81218e-05	7.18822e-05	3.33087e-05	4.9943e-05	4.40642e-05	4.04865e-05	4.30003e-05	0.000499218	12	Sorting nexin-3 OS=Rattus norvegicus OX=10116 GN=Snx3 PE=1 SV=1
Prefrontal-cortex	P18445	Rpl27a	2.39415e-05	3.58026e-05	3.25298e-05	1.36878e-05	1.81937e-05	2.10653e-05	4.60521e-05	2.43488e-05	3.03177e-05	3.76013e-05	4.00776e-05	4.16658e-05	0.000365284	12	60S ribosomal protein L27a OS=Rattus norvegicus OX=10116 GN=Rpl27a PE=1 SV=3
Prefrontal-cortex	P35427	Rpl13a	2.47126e-05	2.9005e-05	3.72019e-05	1.51277e-05	2.21725e-05	3.32151e-05	2.19183e-05	2.42727e-05	2.56092e-05	3.96532e-05	5.48691e-05	4.04655e-05	0.000368223	12	60S ribosomal protein L13a OS=Rattus norvegicus OX=10116 GN=Rpl13a PE=1 SV=2
Prefrontal-cortex	P70567	Tmod1		4.55638e-06	1.78923e-06	1.55687e-07	5.14086e-07	2.20985e-07	2.73945e-06	1.57032e-06	2.55068e-06	1.58483e-06	5.8668e-07		1.62683e-05	10	Tropomodulin-1 OS=Rattus norvegicus OX=10116 GN=Tmod1 PE=2 SV=1
Prefrontal-cortex	Q4V8F9	Hsdl2				2.44519e-06	6.3633e-06	1.50429e-06		2.13181e-06	2.39164e-06	3.02133e-06	3.34293e-06	4.91655e-06	2.61171e-05	8	Hydroxysteroid dehydrogenase-like protein 2 OS=Rattus norvegicus OX=10116 GN=Hsdl2 PE=2 SV=1
Prefrontal-cortex	P97700	Slc25a11	1.76684e-05	0.000110846	7.93618e-06	3.45452e-06	4.02754e-06		5.74163e-06			2.56484e-05	8.56449e-07		0.000176179	8	Mitochondrial 2-oxoglutarate/malate carrier protein OS=Rattus norvegicus OX=10116 GN=Slc25a11 PE=1 SV=3
Prefrontal-cortex	Q9ES21	Sacm1l	1.63016e-06	2.21284e-05	3.3596e-06	1.37444e-06	1.69959e-07		1.50207e-05	2.90972e-06	7.34844e-06	8.96736e-06	9.18232e-06	5.16921e-06	7.72603e-05	11	Phosphatidylinositol-3-phosphatase SAC1 OS=Rattus norvegicus OX=10116 GN=Sacm1l PE=1 SV=1
Prefrontal-cortex	Q9Z2L0	Vdac1	1.89232e-05	0.000466536	6.36881e-05	1.41296e-05	0.000126535	5.03078e-05	7.85898e-05	1.21447e-05	1.34623e-05	0.000211834	3.78997e-05	1.58143e-05	0.00110986	12	Voltage-dependent anion-selective channel protein 1 OS=Rattus norvegicus OX=10116 GN=Vdac1 PE=1 SV=4
Prefrontal-cortex	F1LNJ2	Snrnp200	1.88379e-07	1.1205e-06	6.96005e-07		5.87695e-07	1.09419e-06	1.78225e-06	3.25348e-07	8.30851e-07	2.12764e-06	1.55061e-06	2.02286e-06	1.23263e-05	11	U5 small nuclear ribonucleoprotein 200 kDa helicase OS=Rattus norvegicus OX=10116 GN=Snrnp200 PE=1 SV=1
Prefrontal-cortex	Q5U2U2	Crkl	6.66955e-06	3.88954e-07	2.48719e-06	3.93221e-06	4.17629e-06	3.97786e-06	3.83576e-06		6.08535e-06	5.31109e-06	7.20425e-06	1.00291e-05	5.40977e-05	11	Crk-like protein OS=Rattus norvegicus OX=10116 GN=Crkl PE=1 SV=1
Prefrontal-cortex	P63174	Rpl38	2.66718e-06	1.45573e-05	9.33679e-06	2.49788e-06	4.97095e-06	5.62971e-06	1.2321e-05	6.04157e-06	1.22512e-05	6.25572e-06	1.62726e-05	1.64872e-05	0.000109289	12	60S ribosomal protein L38 OS=Rattus norvegicus OX=10116 GN=Rpl38 PE=1 SV=2
Prefrontal-cortex	P24050	Rps5	1.67453e-05	2.13119e-05	2.11465e-05	1.04761e-05	9.06444e-06	2.28332e-05	1.76044e-05	1.81668e-05	2.27753e-05	1.7267e-05	2.32984e-05	2.73268e-05	0.000228016	12	40S ribosomal protein S5 OS=Rattus norvegicus OX=10116 GN=Rps5 PE=1 SV=3
Prefrontal-cortex	P97576	Grpel1	1.23826e-05	8.68452e-06	1.05813e-05	1.22964e-05	8.14857e-06	5.77386e-06	1.02255e-05	1.47074e-05	6.79479e-06	7.92369e-06	1.54196e-05	7.16643e-06	0.000120105	12	GrpE protein homolog 1, mitochondrial OS=Rattus norvegicus OX=10116 GN=Grpel1 PE=1 SV=2
Prefrontal-cortex	P23711	Hmox2		4.39364e-06	7.30581e-06	5.63365e-06	7.19777e-06		1.82849e-05	3.14491e-06		1.09462e-05	1.11405e-05		6.80474e-05	8	Heme oxygenase 2 OS=Rattus norvegicus OX=10116 GN=Hmox2 PE=1 SV=1
Prefrontal-cortex	P29314	Rps9	9.6769e-05	0.000123315	5.79972e-05	0.000123391	4.11143e-05	7.32394e-05	0.000145311	0.000127614	0.000111099	6.01102e-05	7.86184e-05	9.63464e-05	0.00113493	12	40S ribosomal protein S9 OS=Rattus norvegicus OX=10116 GN=Rps9 PE=1 SV=4
Prefrontal-cortex	P04646	Rpl35a			3.739e-05	5.20354e-06	2.02773e-05	1.61723e-05	2.64321e-05			1.04259e-05	2.90784e-05	3.79125e-06	0.000148771	8	60S ribosomal protein L35a OS=Rattus norvegicus OX=10116 GN=Rpl35a PE=3 SV=1
Prefrontal-cortex	P11250	Rpl34	2.41989e-05		2.6041e-05	8.77473e-06			1.60798e-05	1.03058e-05	1.83316e-05	2.24964e-05	3.24424e-05		0.000158671	8	60S ribosomal protein L34 OS=Rattus norvegicus OX=10116 GN=Rpl34 PE=1 SV=3
Prefrontal-cortex	P10960	Psap	0.000577591	0.000382095	0.000493347	0.000299171	0.000469818	0.000674364	0.000507713	0.000640044	0.000635377	0.000595529	0.000704017	0.000608154	0.00658722	12	Prosaposin OS=Rattus norvegicus OX=10116 GN=Psap PE=1 SV=1
Prefrontal-cortex	P10860	Glud1	0.00175238	0.00131645	0.00280212	0.00203824	0.00141112	0.0022861	0.00153533	0.00118333	0.00093126	0.00138175	0.00240092	0.00122887	0.0202679	12	Glutamate dehydrogenase 1, mitochondrial OS=Rattus norvegicus OX=10116 GN=Glud1 PE=1 SV=2
Prefrontal-cortex	Q9QUL6	Nsf	0.00235433	0.00311768	0.00322279	0.00192172	0.00207822	0.00216578	0.00245805	0.00257298	0.00240546	0.00295647	0.00195963	0.00268101	0.0298941	12	Vesicle-fusing ATPase OS=Rattus norvegicus OX=10116 GN=Nsf PE=1 SV=1
Prefrontal-cortex	P62168	Ncs1	2.64334e-05	3.21529e-05	1.62602e-05	1.83366e-05	1.7035e-05	1.29496e-05	3.0603e-05	2.75757e-05	1.97352e-05	2.97498e-05	2.89101e-05	2.04033e-05	0.000280145	12	Neuronal calcium sensor 1 OS=Rattus norvegicus OX=10116 GN=Ncs1 PE=1 SV=2
Prefrontal-cortex	P04256	Hnrnpa1	6.30661e-05	2.03607e-05	7.84824e-05	5.42963e-05	0.000128467	0.000181827	0.000188158	0.00010405	6.14077e-05	0.000154097	0.000224615	0.000156379	0.00141521	12	Heterogeneous nuclear ribonucleoprotein A1 OS=Rattus norvegicus OX=10116 GN=Hnrnpa1 PE=1 SV=3
Prefrontal-cortex	Q641Y8	Ddx1	2.89722e-05	2.56614e-05	3.97192e-05	1.0501e-05	3.19868e-05	2.83335e-05	4.52339e-05	1.17257e-05	3.55797e-05	3.29986e-05	3.75139e-05	4.8244e-05	0.00037647	12	ATP-dependent RNA helicase DDX1 OS=Rattus norvegicus OX=10116 GN=Ddx1 PE=1 SV=1
Prefrontal-cortex	Q63081	Pdia6	6.03841e-05	6.42943e-05	7.47251e-05	6.51359e-05	3.98665e-05	6.39146e-05	7.016e-05	0.000124239	6.04515e-05	8.34054e-05	7.49131e-05	7.58642e-05	0.000857354	12	Protein disulfide-isomerase A6 OS=Rattus norvegicus OX=10116 GN=Pdia6 PE=1 SV=2
Prefrontal-cortex	P97532	Mpst	7.96944e-06	6.32911e-06	1.16484e-05	7.99416e-06	9.14804e-06	1.31372e-05	8.69487e-06	1.38247e-05	1.63934e-05	1.14107e-05	1.20663e-05	1.35779e-05	0.000132194	12	3-mercaptopyruvate sulfurtransferase OS=Rattus norvegicus OX=10116 GN=Mpst PE=1 SV=3
Prefrontal-cortex	D3ZUQ0	Rilpl1			1.33903e-06	1.97714e-06	2.41649e-06	1.93706e-06	3.69037e-07	1.35561e-06			3.56536e-06	2.84191e-06	1.58016e-05	8	RILP-like protein 1 OS=Rattus norvegicus OX=10116 GN=Rilpl1 PE=1 SV=1
Prefrontal-cortex	Q62951	Dpysl4	0.00016297	6.5646e-05	0.000365332	0.000210486	0.000294204	0.000297597	0.000123716	0.000211982	0.000108637	0.000180358	0.000249016	0.00017528	0.00244523	12	Dihydropyrimidinase-related protein 4 (Fragment) OS=Rattus norvegicus OX=10116 GN=Dpysl4 PE=1 SV=1
Prefrontal-cortex	Q9ESW0	Ddb1	5.9478e-05	4.38037e-05	2.18861e-05	3.07586e-05	3.41099e-05	3.23676e-05	1.65687e-05	5.08254e-05	3.73681e-05	4.42437e-05	6.31142e-05	6.28651e-05	0.000497389	12	DNA damage-binding protein 1 OS=Rattus norvegicus OX=10116 GN=Ddb1 PE=1 SV=1
Prefrontal-cortex	Q9Z1B2	Gstm5	0.000187437	6.70697e-05	0.00010705	7.31487e-05	9.38697e-05	0.000108953	6.50826e-05	7.09754e-05	9.28493e-05	7.24706e-05	0.000119105	0.000105438	0.00116345	12	Glutathione S-transferase Mu 5 OS=Rattus norvegicus OX=10116 GN=Gstm5 PE=1 SV=3
Prefrontal-cortex	P16036	Slc25a3	3.95724e-05	0.000128384	5.59112e-05	4.22825e-05	5.39717e-05	2.49907e-05	3.85732e-05	1.31984e-05	8.17989e-06	7.65145e-05	1.00473e-05	5.44148e-06	0.000497067	12	Phosphate carrier protein, mitochondrial OS=Rattus norvegicus OX=10116 GN=Slc25a3 PE=1 SV=1
Prefrontal-cortex	Q6Q0N1	Cndp2	7.27012e-05	4.93575e-05	6.89811e-05	5.27794e-05	8.56944e-05	0.000126752	6.83215e-05	0.000112207	8.62769e-05	9.68297e-05	0.00011859	0.000110556	0.00104905	12	Cytosolic non-specific dipeptidase OS=Rattus norvegicus OX=10116 GN=Cndp2 PE=1 SV=1
Prefrontal-cortex	P35704	Prdx2	0.000764776	0.000640402	0.000585502	0.00031004	0.000475798	0.000630315	0.000378158	0.000606482	0.000605378	0.000564383	0.000470453	0.000777673	0.00680936	12	Peroxiredoxin-2 OS=Rattus norvegicus OX=10116 GN=Prdx2 PE=1 SV=3
Prefrontal-cortex	P50475	Aars1	6.80092e-05	8.33903e-05	5.83285e-05	5.58576e-05	0.000213533	0.000197248	5.89822e-05	0.000145364	0.000106285	8.31649e-05	7.20934e-05	7.0423e-05	0.00121268	12	Alanine--tRNA ligase, cytoplasmic OS=Rattus norvegicus OX=10116 GN=Aars1 PE=1 SV=3
Prefrontal-cortex	P47858	Pfkm	0.000440646	0.000224743	0.000474053	0.000307568	0.000486229	0.000461607	0.000401975	0.000533972	0.000410381	0.000478206	0.000426773	0.000443238	0.00508939	12	ATP-dependent 6-phosphofructokinase, muscle type OS=Rattus norvegicus OX=10116 GN=Pfkm PE=1 SV=3
Prefrontal-cortex	Q5FVH2	Pld3	2.70968e-05	5.12699e-05	3.4206e-05	1.73107e-05	3.27842e-05	3.16404e-05	4.02483e-05	3.05055e-05	2.69795e-05	2.95166e-05	3.55773e-05	4.9263e-05	0.000406398	12	5'-3' exonuclease PLD3 OS=Rattus norvegicus OX=10116 GN=Pld3 PE=1 SV=1
Prefrontal-cortex	P21531	Rpl3	5.87675e-05	6.26511e-05	7.6737e-05	3.08928e-05	4.8379e-05	7.51934e-05	0.00010089	5.86763e-05	6.34162e-05	9.48193e-05	0.000119535	9.16563e-05	0.000881614	12	60S ribosomal protein L3 OS=Rattus norvegicus OX=10116 GN=Rpl3 PE=1 SV=3
Prefrontal-cortex	Q4KM73	Cmpk1	9.35937e-05	5.41201e-05	8.18887e-05	4.43237e-05	7.16305e-05	8.4329e-05	6.96677e-05	7.01475e-05	6.38026e-05	8.79725e-05	7.86329e-05	9.85754e-05	0.000898684	12	UMP-CMP kinase OS=Rattus norvegicus OX=10116 GN=Cmpk1 PE=1 SV=2
Prefrontal-cortex	P13086	Suclg1	0.000149927	8.05786e-05	0.000171243	9.41018e-05	0.000110094	0.000130819	0.000124013	0.000163324	0.000115238	0.000100429	0.000128315	0.00011298	0.00148106	12	Succinate--CoA ligase [ADP/GDP-forming] subunit alpha, mitochondrial OS=Rattus norvegicus OX=10116 GN=Suclg1 PE=2 SV=2
Prefrontal-cortex	Q3B8Q0	Mapre2	0.000102613	5.368e-05	7.39926e-05	3.46677e-05	6.10864e-05	8.11245e-05	5.93733e-05	7.70672e-05	6.33324e-05	7.44635e-05	5.55603e-05	5.91365e-05	0.000796097	12	Microtubule-associated protein RP/EB family member 2 OS=Rattus norvegicus OX=10116 GN=Mapre2 PE=1 SV=1
Prefrontal-cortex	P68182	Prkacb	3.39945e-05	4.85949e-05	3.23483e-05	1.541e-05	2.20067e-05	2.96397e-05	2.63632e-05		2.93074e-05	3.36803e-05	2.80905e-05	3.55124e-05	0.000334948	11	cAMP-dependent protein kinase catalytic subunit beta OS=Rattus norvegicus OX=10116 GN=Prkacb PE=1 SV=2
Prefrontal-cortex	Q7M0E3	Dstn	0.000210961	0.000123642	0.000194703	6.17607e-05	0.000153598	0.000149399	0.000130107	0.00018117	0.000148632	0.000184456	0.000170847	0.000187617	0.00189689	12	Destrin OS=Rattus norvegicus OX=10116 GN=Dstn PE=1 SV=3
Prefrontal-cortex	Q5RJR2	Twf1	6.30746e-06	7.833e-06	1.29372e-05	1.12206e-05	1.25649e-05	1.60317e-05	6.63091e-06	2.15542e-05	9.73409e-06	1.63326e-05	1.96916e-05	1.73197e-05	0.000158158	12	Twinfilin-1 OS=Rattus norvegicus OX=10116 GN=Twf1 PE=1 SV=1
Prefrontal-cortex	P61972	Nutf2	0.000110576		0.000115138	9.28436e-05	4.96113e-05	7.83174e-05	1.51481e-05	2.19538e-05	5.02228e-06	3.22502e-05	2.88382e-05	1.56995e-05	0.000565398	11	Nuclear transport factor 2 OS=Rattus norvegicus OX=10116 GN=Nutf2 PE=1 SV=1
Prefrontal-cortex	P35435	Atp5f1c	3.74784e-05	7.80596e-05	6.8552e-05	5.26325e-05	6.98613e-05	3.18151e-05	4.60636e-05	1.6386e-05	1.44589e-05	5.18327e-05	2.40961e-05	1.77218e-05	0.000508958	12	ATP synthase subunit gamma, mitochondrial OS=Rattus norvegicus OX=10116 GN=Atp5f1c PE=1 SV=2
Prefrontal-cortex	P12368	Prkar2a	2.79653e-05	4.54351e-05	5.28228e-05	1.99207e-05	3.2451e-05	3.91153e-05	5.4811e-05	8.25312e-05	2.60827e-05	4.6122e-05	5.45484e-05	3.55112e-05	0.000517317	12	cAMP-dependent protein kinase type II-alpha regulatory subunit OS=Rattus norvegicus OX=10116 GN=Prkar2a PE=1 SV=4
Prefrontal-cortex	Q9QX69	Lancl1	8.28735e-05	6.34059e-05	0.000119334	7.69821e-05	0.000116797	0.000143075	0.000115057	0.00012311	0.000108166	0.00011705	0.000126999	0.000144292	0.00133714	12	Glutathione S-transferase LANCL1 OS=Rattus norvegicus OX=10116 GN=Lancl1 PE=1 SV=2
Prefrontal-cortex	P13264	Gls	6.33981e-05	3.76176e-05	9.57656e-05	8.12602e-05	6.71546e-05	8.46937e-05	6.63464e-05	8.73266e-05	4.24136e-05	8.17175e-05	9.5548e-05	5.63255e-05	0.000859567	12	Glutaminase kidney isoform, mitochondrial OS=Rattus norvegicus OX=10116 GN=Gls PE=1 SV=2
Prefrontal-cortex	Q64428	Hadha	0.000645285	0.000601386	0.000278667	5.87452e-05	2.67695e-05	3.85421e-05	3.13379e-05	2.4829e-05	2.5993e-05	0.000130589	7.44781e-05	0.000559591	0.00249621	12	Trifunctional enzyme subunit alpha, mitochondrial OS=Rattus norvegicus OX=10116 GN=Hadha PE=1 SV=2
Prefrontal-cortex	P32551	Uqcrc2	1.76961e-05	2.31946e-05	3.28314e-05	3.02019e-05	2.3886e-05	8.10693e-06	1.80785e-05			5.37956e-05	6.71408e-06		0.000214505	9	Cytochrome b-c1 complex subunit 2, mitochondrial OS=Rattus norvegicus OX=10116 GN=Uqcrc2 PE=1 SV=2
Prefrontal-cortex	P11030	Dbi	0.000225972	0.000153757	0.000228256	0.000136275	0.000156816	0.000263745	0.000191484	0.000192532	0.000182621	0.000211503	0.000186376	0.000218488	0.00234783	12	Acyl-CoA-binding protein OS=Rattus norvegicus OX=10116 GN=Dbi PE=1 SV=3
Prefrontal-cortex	Q5MJ12	Fbxl16	3.7059e-05	2.30665e-05	3.14872e-05	2.82368e-05	2.22549e-05	2.45931e-05	1.64089e-05	3.53488e-05	2.7813e-05	2.0502e-05	2.95929e-05	3.73073e-05	0.00033367	12	F-box/LRR-repeat protein 16 OS=Rattus norvegicus OX=10116 GN=Fbxl16 PE=2 SV=1
Prefrontal-cortex	Q80Z29	Nampt				7.83344e-07	8.56755e-06	2.12033e-06	2.01408e-06	2.93701e-06	3.32112e-06	3.03103e-06	4.09089e-06	3.1938e-06	3.00592e-05	9	Nicotinamide phosphoribosyltransferase OS=Rattus norvegicus OX=10116 GN=Nampt PE=1 SV=1
Prefrontal-cortex	P22831	Synpr	3.88839e-05	0.000131349	9.99458e-05	2.56094e-05	5.89381e-05	4.9902e-05	0.000105916	3.87043e-05	2.47567e-05	7.11718e-05	7.45531e-05	3.9661e-05	0.000759391	12	Synaptoporin OS=Rattus norvegicus OX=10116 GN=Synpr PE=1 SV=2
Prefrontal-cortex	A0JPJ7	Ola1	8.46855e-05	5.24967e-05	9.93618e-05	7.40907e-05	6.41956e-05	0.000104585	7.1244e-05	0.000156053	5.91454e-05	9.59941e-05	8.88387e-05	0.000128593	0.00107928	12	Obg-like ATPase 1 OS=Rattus norvegicus OX=10116 GN=Ola1 PE=2 SV=1
Prefrontal-cortex	A2VCX1	Tiprl	6.61859e-07		4.03561e-06	4.04024e-06	5.18345e-06	9.60651e-06	3.59355e-06	4.18493e-06	5.09796e-06	6.90946e-06	6.04074e-06	5.66738e-06	5.50217e-05	11	TIP41-like protein OS=Rattus norvegicus OX=10116 GN=Tiprl PE=1 SV=1
Prefrontal-cortex	P20650	Ppm1a	1.48463e-05	6.38365e-06	5.95706e-06	9.17202e-06	8.72784e-06	4.64201e-06	7.63614e-06	1.53716e-05	2.33652e-05	2.56443e-06	7.21312e-06	5.8596e-05	0.000164475	12	Protein phosphatase 1A OS=Rattus norvegicus OX=10116 GN=Ppm1a PE=1 SV=1
Prefrontal-cortex	Q9QYW3	Mob4	3.45996e-06	4.85469e-06	1.63643e-05	2.61972e-06	2.12385e-05	6.4426e-06	2.05494e-05	2.11933e-05	2.03682e-06	2.89765e-05	1.58795e-05	1.93429e-05	0.000162958	12	MOB-like protein phocein OS=Rattus norvegicus OX=10116 GN=Mob4 PE=1 SV=1
Prefrontal-cortex	Q9Z1N4	Bpnt1	6.57487e-05	7.532e-05	5.9106e-05	6.01237e-05	7.0719e-05	9.06269e-05	4.22537e-05	6.02761e-05	5.69971e-05	6.41436e-05	4.47027e-05	6.09673e-05	0.000750985	12	3'(2'),5'-bisphosphate nucleotidase 1 OS=Rattus norvegicus OX=10116 GN=Bpnt1 PE=1 SV=1
Prefrontal-cortex	O88370	Pip4k2c	3.16859e-05	2.6799e-05	5.21208e-05	5.05005e-05	1.59401e-05	1.45149e-05	1.84753e-05	7.11866e-05	1.80477e-05	9.86666e-06	9.16586e-06	1.64975e-05	0.000334801	12	Phosphatidylinositol 5-phosphate 4-kinase type-2 gamma OS=Rattus norvegicus OX=10116 GN=Pip4k2c PE=1 SV=1
Prefrontal-cortex	P63102	Ywhaz	0.00381264	0.00302918	0.00349327	0.00250841	0.00300294	0.00339743	0.00282322	0.0034558	0.00358752	0.00300477	0.00298326	0.00408164	0.0391801	12	14-3-3 protein zeta/delta OS=Rattus norvegicus OX=10116 GN=Ywhaz PE=1 SV=1
Prefrontal-cortex	Q9Z270	Vapa	1.88516e-05	2.69827e-05	3.63454e-05	1.52517e-05	3.10926e-05	2.74688e-05	4.90744e-05	1.38451e-05	2.47916e-05	2.62048e-05	5.08177e-05	2.30468e-05	0.000343773	12	Vesicle-associated membrane protein-associated protein A OS=Rattus norvegicus OX=10116 GN=Vapa PE=1 SV=3
Prefrontal-cortex	P43244	Matr3	7.20748e-05	0.00010139	0.000105859	6.74849e-05	0.000102467	0.000145783	0.000200424	8.27089e-05	6.3041e-05	0.000157114	0.000116085	0.00016878	0.00138321	12	Matrin-3 OS=Rattus norvegicus OX=10116 GN=Matr3 PE=1 SV=2
Prefrontal-cortex	Q8VHK7	Hdgf				1.47874e-06	6.34226e-06	4.93802e-06	4.16594e-06	9.8018e-06	7.53302e-06	2.16e-06	4.97733e-06	5.27216e-06	4.66693e-05	9	Hepatoma-derived growth factor OS=Rattus norvegicus OX=10116 GN=Hdgf PE=1 SV=2
Prefrontal-cortex	P50399	Gdi2	0.000392606	0.000289457	0.000289521	0.000191065	0.000322303	0.000339342	0.000320962	0.000367092	0.000377078	0.000429614	0.000418968	0.000509199	0.00424721	12	Rab GDP dissociation inhibitor beta OS=Rattus norvegicus OX=10116 GN=Gdi2 PE=1 SV=2
Prefrontal-cortex	P52296	Kpnb1	0.000142107	0.000121925	0.000137865	9.91674e-05	0.00012864	0.000135114	0.00028813	0.000329252	0.000133743	0.000298235	0.000209337	0.000190674	0.00221419	12	Importin subunit beta-1 OS=Rattus norvegicus OX=10116 GN=Kpnb1 PE=1 SV=1
Prefrontal-cortex	P85973	Pnp	0.000117096	0.000103634	0.000147587	7.6289e-05	0.000120387	0.000120476	0.000160035	0.0002428	0.000156775	0.000135656	0.000152434	0.000176928	0.0017101	12	Purine nucleoside phosphorylase OS=Rattus norvegicus OX=10116 GN=Pnp PE=1 SV=1
Prefrontal-cortex	P36972	Aprt	3.15504e-05	1.81158e-05	1.03007e-05	1.104e-05	2.32628e-05	1.78677e-05	1.52692e-05	3.20197e-05	3.74936e-05	2.45699e-05	5.53718e-05	5.41788e-05	0.00033104	12	Adenine phosphoribosyltransferase OS=Rattus norvegicus OX=10116 GN=Aprt PE=1 SV=1
Prefrontal-cortex	Q62824	Exoc4	8.90331e-06	1.54347e-05	3.40059e-06	2.82308e-06	3.40786e-06	1.26332e-05	5.13795e-06	2.58758e-06	2.06458e-05	2.3074e-06	7.40599e-06	1.70061e-05	0.000101694	12	Exocyst complex component 4 OS=Rattus norvegicus OX=10116 GN=Exoc4 PE=1 SV=1
Prefrontal-cortex	P61980	Hnrnpk	0.000195724	0.000260913	0.000283176	0.000129584	0.000274443	0.000305365	0.000375056	0.000251838	0.0002823	0.000395137	0.000411491	0.000360996	0.00352602	12	Heterogeneous nuclear ribonucleoprotein K OS=Rattus norvegicus OX=10116 GN=Hnrnpk PE=1 SV=1
Prefrontal-cortex	P35332	Hpcal4	0.000134163	0.000115673	0.000138093	0.000112388	7.74671e-05	9.95918e-05	0.000117364	0.000108808	5.71615e-05	0.000115709	0.000140264	0.000107969	0.00132465	12	Hippocalcin-like protein 4 OS=Rattus norvegicus OX=10116 GN=Hpcal4 PE=2 SV=2
Prefrontal-cortex	P26284	Pdha1	0.0011222	0.000788149	0.000806885	0.000479834	0.000445762	0.000941733	0.00042848	0.000927264	0.000366444	0.000877311	0.000862837	0.000752607	0.00879951	12	Pyruvate dehydrogenase E1 component subunit alpha, somatic form, mitochondrial OS=Rattus norvegicus OX=10116 GN=Pdha1 PE=1 SV=2
Prefrontal-cortex	Q3SWU3	Hnrnpdl	3.14567e-05	4.98864e-05	3.58263e-05	2.79275e-05	2.29551e-05	4.57782e-05	0.000102669	6.31925e-05	1.79604e-05	3.47732e-05	2.12564e-05	2.3543e-05	0.000477224	12	Heterogeneous nuclear ribonucleoprotein D-like OS=Rattus norvegicus OX=10116 GN=Hnrnpdl PE=1 SV=1
Prefrontal-cortex	P52481	Cap2	0.000515034	0.000370965	0.000422919	0.000334413	0.000425522	0.000390072	0.00032488	0.000341319	0.000322733	0.000361832	0.000398791	0.000382659	0.00459114	12	Adenylyl cyclase-associated protein 2 OS=Rattus norvegicus OX=10116 GN=Cap2 PE=1 SV=1
Prefrontal-cortex	P63319	Prkcg	6.28379e-05	0.000181071	0.000187417	7.19425e-05	4.71728e-05	5.07919e-05	0.000156848	5.73133e-05	1.85429e-05	8.04293e-05	1.3093e-05	3.83445e-05	0.000965804	12	Protein kinase C gamma type OS=Rattus norvegicus OX=10116 GN=Prkcg PE=1 SV=1
Prefrontal-cortex	O88989	Mdh1	0.00278679	0.00203343	0.00232411	0.00164483	0.00215913	0.00252404	0.00196969	0.00241531	0.00260179	0.00242548	0.00256724	0.00293742	0.0283893	12	Malate dehydrogenase, cytoplasmic OS=Rattus norvegicus OX=10116 GN=Mdh1 PE=1 SV=3
Prefrontal-cortex	Q62658	Fkbp1a	0.000467402	0.00036776	0.00039884	0.000377267	0.000421846	0.000485388	0.000293786	0.000283125	0.000262642	0.000311141	0.000412488	0.000286814	0.0043685	12	Peptidyl-prolyl cis-trans isomerase FKBP1A OS=Rattus norvegicus OX=10116 GN=Fkbp1a PE=1 SV=3
Prefrontal-cortex	O35095	Ncdn	0.000353238	0.000334507	0.000422842	0.000190667	0.00041668	0.000325214	0.000345718	0.000460474	0.000462341	0.000486427	0.00056044	0.000456698	0.00481525	12	Neurochondrin OS=Rattus norvegicus OX=10116 GN=Ncdn PE=1 SV=2
Prefrontal-cortex	Q63560	Map6	0.000132772	0.000117948	0.000138433	7.28321e-05	0.000194427	0.000237673	0.000153008	0.000124475	9.8811e-05	0.000169983	0.000161741	9.19485e-05	0.00169405	12	Microtubule-associated protein 6 OS=Rattus norvegicus OX=10116 GN=Map6 PE=1 SV=1
Prefrontal-cortex	P63159	Hmgb1	4.86216e-05	2.97116e-05	5.07326e-05	3.14441e-05	6.56156e-05	8.28429e-05	4.73387e-05	6.69952e-05	6.80999e-05	7.23629e-05	6.02536e-05	8.61112e-05	0.00071013	12	High mobility group protein B1 OS=Rattus norvegicus OX=10116 GN=Hmgb1 PE=1 SV=2
Prefrontal-cortex	Q5U316	Rab35	3.0661e-07	2.64538e-05	3.04289e-05	5.79637e-06	8.64864e-06	1.11468e-05	2.46007e-05		4.22494e-06	1.35917e-05	1.55423e-05	5.53076e-06	0.000146271	11	Ras-related protein Rab-35 OS=Rattus norvegicus OX=10116 GN=Rab35 PE=1 SV=1
Prefrontal-cortex	P62024	Phactr1	7.06447e-06	1.51669e-05	2.20249e-05	6.12046e-06	9.04343e-06	8.88023e-06	1.34992e-05	1.63054e-05	1.06494e-05	1.25434e-05	4.68477e-06	1.43384e-05	0.000140321	12	Phosphatase and actin regulator 1 OS=Rattus norvegicus OX=10116 GN=Phactr1 PE=1 SV=1
Prefrontal-cortex	Q99MI7	Uba3	4.27999e-06	5.25833e-06	2.61416e-06	7.48773e-06	1.92376e-06	1.38789e-05		8.73115e-06	9.07499e-06	7.907e-06	6.23793e-06	5.4996e-06	7.28935e-05	11	NEDD8-activating enzyme E1 catalytic subunit OS=Rattus norvegicus OX=10116 GN=Uba3 PE=1 SV=1
Prefrontal-cortex	Q9JLT0	Myh10	1.49837e-05	0.000538801	0.000262953	1.16779e-05	9.93348e-05	3.62951e-05	0.000434482	8.10413e-05	3.91502e-05	0.000229678	0.000140121	4.40992e-05	0.00193262	12	Myosin-10 OS=Rattus norvegicus OX=10116 GN=Myh10 PE=1 SV=1
Prefrontal-cortex	P85834	Tufm	0.000244807	0.000158663	0.000312079	0.000253217	0.000263914	0.000260731	0.000217174	0.000274209	0.0002409	0.000248693	0.000281672	0.000248235	0.00300429	12	Elongation factor Tu, mitochondrial OS=Rattus norvegicus OX=10116 GN=Tufm PE=1 SV=1
Prefrontal-cortex	P21707	Syt1	0.000518907	0.00158741	0.00108787	0.000390529	0.000548982	0.00050325	0.00114682	0.000409565	0.000455716	0.000838343	0.000796836	0.000495003	0.00877924	12	Synaptotagmin-1 OS=Rattus norvegicus OX=10116 GN=Syt1 PE=1 SV=3
Prefrontal-cortex	P85515	Actr1a	0.000222207	0.000163869	0.00018985	0.00014198	0.000191787	0.00018308	0.000165347	0.000186002	0.000175962	0.000200102	0.000240906	0.00019882	0.00225991	12	Alpha-centractin OS=Rattus norvegicus OX=10116 GN=Actr1a PE=1 SV=1
Prefrontal-cortex	Q63754	Sncb	0.000746983	0.000370198	0.000700857	0.000471638	0.000813386	0.000802518	0.000683223	0.000962582	0.000957764	0.000831915	0.000845737	0.00100511	0.00919191	12	Beta-synuclein OS=Rattus norvegicus OX=10116 GN=Sncb PE=1 SV=1
Prefrontal-cortex	P38659	Pdia4	2.28236e-06	1.07381e-06	1.87878e-06	1.32388e-05	1.36797e-05	2.30206e-05	2.78476e-06	6.57554e-06	1.96931e-06	3.13221e-06	1.7746e-05	3.13255e-06	9.05143e-05	12	Protein disulfide-isomerase A4 OS=Rattus norvegicus OX=10116 GN=Pdia4 PE=1 SV=2
Prefrontal-cortex	Q5BJU7	Wasf1	8.68288e-05	8.66364e-05	0.00010474	7.13993e-05	9.92861e-05	0.000121803	0.00010898	0.000123904	7.23089e-05	0.000125676	0.000151451	6.67203e-05	0.00121973	12	Wiskott-Aldrich syndrome protein family member 1 OS=Rattus norvegicus OX=10116 GN=Wasf1 PE=1 SV=1
Prefrontal-cortex	P35745	Acyp2	3.09585e-05	2.14766e-05	2.27376e-05	1.95284e-05	2.82919e-05	2.18651e-05	9.20635e-06	1.19847e-05	1.37479e-05	1.57744e-05	1.74447e-05	1.07984e-05	0.000223815	12	Acylphosphatase-2 OS=Rattus norvegicus OX=10116 GN=Acyp2 PE=1 SV=2
Prefrontal-cortex	Q5XIN6	Letm1	7.19955e-06	8.86814e-06	2.11588e-06	6.18974e-05	1.68164e-06	2.96414e-06	3.9244e-06			3.13368e-06	1.93087e-06		9.37157e-05	9	Mitochondrial proton/calcium exchanger protein OS=Rattus norvegicus OX=10116 GN=Letm1 PE=1 SV=1
Prefrontal-cortex	P20761	Igh-1a	6.86033e-06	4.93194e-05		1.67233e-05	4.5911e-06	1.54675e-05	9.47855e-06			8.95872e-07	1.71505e-05		0.000120487	8	Ig gamma-2B chain C region OS=Rattus norvegicus OX=10116 GN=Igh-1a PE=1 SV=1
Prefrontal-cortex	P62278	Rps13	5.55426e-05	6.98607e-05	8.62747e-05	3.68347e-05	4.466e-05	7.85442e-05	0.000105105	7.29671e-05	6.24088e-05	0.000117109	0.000140402	0.000123219	0.000992928	12	40S ribosomal protein S13 OS=Rattus norvegicus OX=10116 GN=Rps13 PE=1 SV=2
Prefrontal-cortex	O35987	Nsfl1c	8.67696e-05	6.55213e-05	6.32573e-05	6.77151e-05	5.32378e-05	8.05856e-05	0.000108308	0.0001135	9.70003e-05	9.66135e-05	0.000114344	0.00010676	0.00105361	12	NSFL1 cofactor p47 OS=Rattus norvegicus OX=10116 GN=Nsfl1c PE=1 SV=1
Prefrontal-cortex	P04182	Oat	4.25256e-05	2.90152e-05	2.89576e-05	4.1573e-05	1.70372e-05	3.64715e-05	2.68485e-05	3.44386e-05	3.33214e-05	3.66864e-05	5.30242e-05	4.79866e-05	0.000427886	12	Ornithine aminotransferase, mitochondrial OS=Rattus norvegicus OX=10116 GN=Oat PE=1 SV=1
Prefrontal-cortex	P63074	Eif4e	6.13349e-06	7.40038e-06	2.8333e-06	5.34387e-06	1.67658e-06	3.62512e-06		7.32821e-06	3.70368e-06	3.84922e-06	2.24267e-06	8.49016e-06	5.26267e-05	11	Eukaryotic translation initiation factor 4E OS=Rattus norvegicus OX=10116 GN=Eif4e PE=1 SV=1
Prefrontal-cortex	P82995	Hsp90aa1	0.000798403	0.000415436	0.00090205	0.000499512	0.000900335	0.000962811	0.000851649	0.00136258	0.000925995	0.000971912	0.00105122	0.000853843	0.0104957	12	Heat shock protein HSP 90-alpha OS=Rattus norvegicus OX=10116 GN=Hsp90aa1 PE=1 SV=3
Prefrontal-cortex	Q63507	Rpl14	2.89435e-05	4.82095e-05	4.66381e-05	1.43805e-05	4.35647e-05	5.40314e-05	6.08991e-05	2.48156e-05	5.27992e-05	6.16598e-05	7.81033e-05	4.99022e-05	0.000563947	12	60S ribosomal protein L14 OS=Rattus norvegicus OX=10116 GN=Rpl14 PE=1 SV=3
Prefrontal-cortex	O35314	Chgb	2.13679e-06	8.98599e-07	2.85351e-06	4.57807e-06	5.22791e-06	7.42507e-06	3.07123e-06	1.53959e-05	6.35105e-06	7.01955e-06	1.02484e-05	1.26407e-05	7.78468e-05	12	Secretogranin-1 OS=Rattus norvegicus OX=10116 GN=Chgb PE=1 SV=2
Prefrontal-cortex	Q9WVR7	Ppm1f	3.40597e-06	1.10631e-06	8.16094e-07	1.65413e-06	4.22751e-06	4.51015e-06	8.89771e-07	5.03234e-06	6.36623e-06	4.1721e-06	2.97353e-06	6.93353e-06	4.20877e-05	12	Protein phosphatase 1F OS=Rattus norvegicus OX=10116 GN=Ppm1f PE=2 SV=1
Prefrontal-cortex	P00507	Got2	0.00288462	0.00210582	0.00253037	0.00177217	0.00185169	0.0023482	0.00167943	0.00276292	0.00236176	0.00233373	0.00277837	0.00278227	0.0281913	12	Aspartate aminotransferase, mitochondrial OS=Rattus norvegicus OX=10116 GN=Got2 PE=1 SV=2
Prefrontal-cortex	P55068	Bcan	0.000150157	0.000197119	0.000228647	8.45739e-05	0.000160013	0.000178395	0.000175311	0.000245405	0.000241699	0.000217931	0.000220118	0.000309188	0.00240856	12	Brevican core protein OS=Rattus norvegicus OX=10116 GN=Bcan PE=1 SV=2
Prefrontal-cortex	P07323	Eno2	0.00262613	0.00171583	0.00233402	0.00150007	0.00217123	0.00255425	0.00232765	0.0030046	0.00255646	0.00295827	0.00288354	0.00325411	0.0298861	12	Gamma-enolase OS=Rattus norvegicus OX=10116 GN=Eno2 PE=1 SV=2
Prefrontal-cortex	Q9QXU9	Pcsk1n	0.000117805	7.85611e-05	0.000123535	6.72558e-05	6.69065e-05	9.83602e-05	0.00011559	0.000226499	0.000128119	0.000160158	0.000203068	0.000213062	0.00159892	12	ProSAAS OS=Rattus norvegicus OX=10116 GN=Pcsk1n PE=1 SV=1
Prefrontal-cortex	P07895	Sod2	0.000216725	8.54389e-05	0.00018625	0.000159565	0.00015013	0.000175426	9.03943e-05	0.000176083	0.000170038	0.000121728	8.62786e-05	0.000159406	0.00177746	12	Superoxide dismutase [Mn], mitochondrial OS=Rattus norvegicus OX=10116 GN=Sod2 PE=1 SV=2
Prefrontal-cortex	P17077	Rpl9	2.13011e-05	4.25935e-05	2.22174e-05	9.46882e-06	1.8353e-05	2.98298e-05	3.98816e-05	2.59488e-05	2.97901e-05	3.8873e-05	7.17538e-05	4.58794e-05	0.00039589	12	60S ribosomal protein L9 OS=Rattus norvegicus OX=10116 GN=Rpl9 PE=1 SV=1
Prefrontal-cortex	P23965	Eci1	7.84471e-06	8.70715e-05	3.49145e-05	1.1253e-05	9.56317e-06	9.82993e-06	3.78862e-05	0.0001007	2.19797e-06	8.00156e-06	9.40098e-06	3.62108e-06	0.000322284	12	Enoyl-CoA delta isomerase 1, mitochondrial OS=Rattus norvegicus OX=10116 GN=Eci1 PE=1 SV=1
Prefrontal-cortex	Q62696	Dlg1	3.55394e-05	3.29515e-05	2.72523e-05	1.20396e-05	1.836e-05	3.4355e-05	1.27491e-05	2.68889e-05	3.83858e-05	4.75278e-05	6.17022e-05	4.57918e-05	0.000393543	12	Disks large homolog 1 OS=Rattus norvegicus OX=10116 GN=Dlg1 PE=1 SV=1
Prefrontal-cortex	Q00981	Uchl1	0.000535069	0.000327837	0.000588324	0.000388083	0.000641509	0.000767834	0.000577695	0.000823619	0.000787731	0.000700323	0.000616117	0.000576201	0.00733034	12	Ubiquitin carboxyl-terminal hydrolase isozyme L1 OS=Rattus norvegicus OX=10116 GN=Uchl1 PE=1 SV=2
Prefrontal-cortex	Q6P4Z9	Cops8	3.82233e-06		2.81387e-06	6.36311e-06	6.60362e-06	7.7818e-06	8.459e-06	9.75448e-06	7.79196e-06	1.07353e-05	5.21493e-06	1.11075e-05	8.04478e-05	11	COP9 signalosome complex subunit 8 OS=Rattus norvegicus OX=10116 GN=Cops8 PE=2 SV=1
Prefrontal-cortex	Q8K4K5	Llgl1	3.95872e-07			1.10953e-05	7.12131e-06	1.13749e-05		3.33352e-06		1.34014e-05	1.71826e-05		6.39049e-05	7	Lethal(2) giant larvae protein homolog 1 OS=Rattus norvegicus OX=10116 GN=Llgl1 PE=1 SV=1
Prefrontal-cortex	Q5EGY4	Ykt6	3.83062e-05	5.50062e-05	3.69381e-05	1.77309e-05	1.78175e-05	2.94835e-05	3.97014e-05	3.28627e-05	2.6096e-05	2.95934e-05	5.07425e-05	4.83123e-05	0.000422591	12	Synaptobrevin homolog YKT6 OS=Rattus norvegicus OX=10116 GN=Ykt6 PE=1 SV=1
Prefrontal-cortex	Q6P7R8	Hsd17b12		1.88453e-05		2.48044e-06	9.03641e-07		1.32772e-05			1.19605e-06	3.25497e-06	7.84099e-07	4.07417e-05	7	Very-long-chain 3-oxoacyl-CoA reductase OS=Rattus norvegicus OX=10116 GN=Hsd17b12 PE=2 SV=1
Prefrontal-cortex	P63245	Rack1	0.000128236	0.000147263	0.000110353	7.62069e-05	6.59581e-05	0.000121337	0.000118182	6.64245e-05	0.000170602	0.000138539	0.000212022	0.000176996	0.00153212	12	Receptor of activated protein C kinase 1 OS=Rattus norvegicus OX=10116 GN=Rack1 PE=1 SV=3
Prefrontal-cortex	P18422	Psma3	5.3314e-05	3.16385e-05	4.28806e-05	2.9433e-05	5.46345e-05	5.24254e-05	3.87725e-05	6.50188e-05	4.22074e-05	5.48357e-05	5.71824e-05	4.92726e-05	0.000571615	12	Proteasome subunit alpha type-3 OS=Rattus norvegicus OX=10116 GN=Psma3 PE=1 SV=3
Prefrontal-cortex	Q792I0	Lin7c	4.93425e-06	1.00055e-05	7.91317e-06	8.43225e-06	6.81032e-06	9.94842e-06	9.77139e-06	1.18896e-05	2.08772e-06	1.12968e-05	9.38909e-06	7.27533e-06	9.97538e-05	12	Protein lin-7 homolog C OS=Rattus norvegicus OX=10116 GN=Lin7c PE=1 SV=1
Prefrontal-cortex	Q9ER24	Atxn10	4.14473e-06	2.04292e-06	4.87482e-07	2.47265e-06	2.52753e-06	1.67633e-06	5.04858e-06	1.06498e-05	5.18779e-06		5.82717e-06	9.34988e-06	4.94149e-05	11	Ataxin-10 OS=Rattus norvegicus OX=10116 GN=Atxn10 PE=1 SV=1
Prefrontal-cortex	Q63610-2	Tpm3	4.50057e-06	3.40191e-06	4.9966e-06	5.49417e-06	5.66411e-06		6.04901e-06	9.89798e-06		1.06185e-05	1.21449e-05	1.00791e-05	7.28469e-05	10	Isoform 2 of Tropomyosin alpha-3 chain OS=Rattus norvegicus OX=10116 GN=Tpm3
Prefrontal-cortex	P62282	Rps11	1.14313e-05	3.19252e-05	5.98147e-05	2.20997e-05	2.47384e-05	3.69467e-05	5.14533e-05	3.29803e-05	1.77311e-05	3.64138e-05	4.84195e-05	1.81883e-05	0.000392142	12	40S ribosomal protein S11 OS=Rattus norvegicus OX=10116 GN=Rps11 PE=1 SV=3
Prefrontal-cortex	P14841	Cst3	2.9398e-05	2.77287e-05	3.14232e-05	1.95803e-05	3.72344e-05	4.37291e-05	6.16213e-05	9.42446e-05	6.88323e-05	6.82614e-05	7.80624e-05	8.74848e-05	0.000647601	12	Cystatin-C OS=Rattus norvegicus OX=10116 GN=Cst3 PE=1 SV=2
Prefrontal-cortex	Q9QYU4	Crym	0.000457465	0.000287857	0.000393753	0.000353782	0.000338763	0.000501542	0.000423946	0.000300217	0.000244235	0.00036942	0.000309917	0.000392729	0.00437362	12	Ketimine reductase mu-crystallin OS=Rattus norvegicus OX=10116 GN=Crym PE=1 SV=1
Prefrontal-cortex	P62747	Rhob	1.30475e-05	7.1322e-05	6.88281e-05	1.85586e-05	2.76914e-05	3.0399e-05	3.02258e-05	1.16004e-05	1.29528e-05	2.44791e-05	2.34597e-05	1.58381e-05	0.000348403	12	Rho-related GTP-binding protein RhoB OS=Rattus norvegicus OX=10116 GN=Rhob PE=1 SV=1
Prefrontal-cortex	P05065	Aldoa	0.00304702	0.00195574	0.00288395	0.00167651	0.00269059	0.00284885	0.00241783	0.00289418	0.00294713	0.00289032	0.00309999	0.00333426	0.0326864	12	Fructose-bisphosphate aldolase A OS=Rattus norvegicus OX=10116 GN=Aldoa PE=1 SV=2
Prefrontal-cortex	Q63797	Psme1	4.60394e-06	1.167e-05	1.17646e-05	7.76308e-06	9.12868e-06	1.08688e-05	4.71696e-06	1.21685e-05	2.42549e-05	1.51307e-05	2.97426e-05	2.90585e-05	0.000170871	12	Proteasome activator complex subunit 1 OS=Rattus norvegicus OX=10116 GN=Psme1 PE=2 SV=1
Prefrontal-cortex	Q64119	Myl6	1.15777e-05	0.000188641	7.94546e-05	1.15739e-05	4.64737e-05	3.85669e-05	0.00013317	4.82852e-05	2.39151e-05	8.65509e-05	7.0433e-05	4.39895e-05	0.000782631	12	Myosin light polypeptide 6 OS=Rattus norvegicus OX=10116 GN=Myl6 PE=1 SV=3
Prefrontal-cortex	P84083	Arf5	4.35144e-05	1.86931e-05	3.76072e-05	4.22493e-05	6.07551e-05	6.80742e-05	3.15115e-05	4.16064e-05	1.35806e-05	4.84451e-05	5.27512e-05	2.56702e-05	0.000484458	12	ADP-ribosylation factor 5 OS=Rattus norvegicus OX=10116 GN=Arf5 PE=1 SV=2
Prefrontal-cortex	P24329	Tst	5.00938e-05	4.67463e-05	5.18658e-05	3.33351e-05	4.59972e-05	6.87471e-05	2.81287e-05	5.87016e-05	5.34824e-05	5.66097e-05	3.94782e-05	4.47611e-05	0.000577947	12	Thiosulfate sulfurtransferase OS=Rattus norvegicus OX=10116 GN=Tst PE=1 SV=3
Prefrontal-cortex	P24368	Ppib	6.49673e-05	0.000103744	7.55425e-05	3.83102e-05	7.7506e-05	8.36307e-05	9.18899e-05	9.18996e-05	5.24816e-05	8.79764e-05	0.000105862	7.29379e-05	0.000946748	12	Peptidyl-prolyl cis-trans isomerase B OS=Rattus norvegicus OX=10116 GN=Ppib PE=1 SV=3
Prefrontal-cortex	Q4G009	Mcts1	9.91981e-06	7.19272e-06	3.59478e-06	5.99954e-06	4.20733e-06	7.01988e-06	4.23725e-06			5.2251e-06	5.35085e-06	2.74426e-06	5.54915e-05	10	Malignant T-cell-amplified sequence 1 OS=Rattus norvegicus OX=10116 GN=Mcts1 PE=2 SV=1
Prefrontal-cortex	P20280	Rpl21	2.50705e-06	6.70031e-06	1.23192e-05	4.02717e-06	5.97464e-06	1.15314e-05	2.28105e-05	1.95269e-05		1.5953e-05	2.16226e-05		0.000122973	10	60S ribosomal protein L21 OS=Rattus norvegicus OX=10116 GN=Rpl21 PE=1 SV=3
Prefrontal-cortex	P62907	Rpl10a	1.92338e-05	2.46389e-05	2.96634e-05	8.84914e-06	2.70312e-05	3.26538e-05	4.01757e-05	3.22405e-05	1.3361e-05	3.00927e-05	5.37533e-05	3.08828e-05	0.000342576	12	60S ribosomal protein L10a OS=Rattus norvegicus OX=10116 GN=Rpl10a PE=1 SV=2
Prefrontal-cortex	Q5U2R0	Mat2b	6.35321e-06	5.05759e-06	1.5735e-06	3.89099e-06	5.38663e-06	3.06203e-05	4.89022e-06	1.27514e-05	5.66272e-06	7.51624e-06	4.94457e-06	1.16069e-05	0.000100254	12	Methionine adenosyltransferase 2 subunit beta OS=Rattus norvegicus OX=10116 GN=Mat2b PE=2 SV=1
Prefrontal-cortex	Q1JU68	Eif3a	5.41215e-06	4.90199e-06	4.11106e-06	3.07701e-06	8.6675e-06	1.02552e-05	1.5154e-05	1.7167e-05	5.61887e-06	1.42172e-05	3.24597e-05	2.63141e-05	0.000147356	12	Eukaryotic translation initiation factor 3 subunit A OS=Rattus norvegicus OX=10116 GN=Eif3a PE=2 SV=2
Prefrontal-cortex	P60522	Gabarapl2	5.02636e-06	2.56904e-05	1.07219e-05	3.85391e-07	8.15347e-06	5.13687e-06	7.89749e-06	1.69322e-05	1.18094e-05	1.4102e-05	9.38017e-06	2.18889e-05	0.000137124	12	Gamma-aminobutyric acid receptor-associated protein-like 2 OS=Rattus norvegicus OX=10116 GN=Gabarapl2 PE=3 SV=1
Prefrontal-cortex	Q4G017	Nisch	1.10828e-06	2.26478e-06	9.58443e-07	1.67422e-05	2.55596e-06	1.61928e-05		1.07291e-05	7.72187e-06	2.46726e-06	1.25058e-05	4.68885e-06	7.79353e-05	11	Nischarin OS=Rattus norvegicus OX=10116 GN=Nisch PE=2 SV=2
Prefrontal-cortex	P97612	Faah		6.333e-06	1.1191e-07	1.2594e-06	2.78163e-07		2.18768e-06		6.63136e-06	8.88761e-07	1.12203e-06		1.88123e-05	8	Fatty-acid amide hydrolase 1 OS=Rattus norvegicus OX=10116 GN=Faah PE=1 SV=1
Prefrontal-cortex	P29266	Hibadh	3.4011e-05	1.8443e-05	4.82214e-05	2.88217e-05	2.91637e-05	4.51266e-05	4.07975e-05	5.34275e-05	2.19872e-05	5.42935e-05	4.89008e-05	2.99008e-05	0.000453095	12	3-hydroxyisobutyrate dehydrogenase, mitochondrial OS=Rattus norvegicus OX=10116 GN=Hibadh PE=1 SV=3
Prefrontal-cortex	P05371	Clu	3.81292e-06	5.89739e-06	4.14932e-06	5.29465e-06	4.0247e-06	2.64391e-06	7.20577e-06	1.09427e-05	1.54879e-05	5.39333e-06	1.27479e-05	2.97116e-05	0.000107312	12	Clusterin OS=Rattus norvegicus OX=10116 GN=Clu PE=1 SV=2
Prefrontal-cortex	Q6P4Z6	Lcmt1	6.46347e-06	3.17549e-06	5.03669e-06	5.60693e-06	5.93899e-06		3.83839e-06	8.35065e-06	3.79103e-06	9.46614e-06	5.14899e-06	6.59554e-06	6.34123e-05	11	Leucine carboxyl methyltransferase 1 OS=Rattus norvegicus OX=10116 GN=Lcmt1 PE=2 SV=1
Prefrontal-cortex	Q64548	Rtn1	0.000138019	0.000121882	0.000199031	0.0001329	0.000154435	0.000176474	0.00022239	0.00014242	0.000103986	0.000201405	0.00014191	0.000158626	0.00189348	12	Reticulon-1 OS=Rattus norvegicus OX=10116 GN=Rtn1 PE=1 SV=1
Prefrontal-cortex	P27653	Mthfd1	6.17447e-06		2.79366e-06	1.06195e-05	5.40486e-06	1.10191e-05	1.4106e-05	9.02816e-06	8.90564e-06	5.9645e-06	5.62232e-06	8.09972e-06	8.7738e-05	11	C-1-tetrahydrofolate synthase, cytoplasmic OS=Rattus norvegicus OX=10116 GN=Mthfd1 PE=1 SV=3
Prefrontal-cortex	O08730	Gyg1	2.76561e-06		6.78163e-05	2.86568e-05	4.6578e-05	5.54007e-05	4.55085e-05	5.013e-05	5.22006e-05	5.56023e-05	6.93053e-05		0.000473964	10	Glycogenin-1 OS=Rattus norvegicus OX=10116 GN=Gyg1 PE=2 SV=4
Prefrontal-cortex	P83868	Ptges3	0.000127984	7.99e-05	0.00013053	7.66057e-05	0.000126396	0.000142872	0.00012776	0.00018834	9.96463e-05	0.000118785	9.51599e-05	0.000125807	0.00143979	12	Prostaglandin E synthase 3 OS=Rattus norvegicus OX=10116 GN=Ptges3 PE=1 SV=2
Prefrontal-cortex	Q5XIC0	Eci2	8.63799e-06	1.10563e-05	5.23806e-06	8.47202e-06	3.82908e-06	8.58953e-06	4.23183e-06	1.10252e-05	9.49699e-06	5.25322e-06	1.73895e-05	6.04297e-06	9.92627e-05	12	Enoyl-CoA delta isomerase 2 OS=Rattus norvegicus OX=10116 GN=Eci2 PE=1 SV=1
Prefrontal-cortex	Q4KM74	Sec22b	6.89789e-06	2.84953e-05	1.98008e-05	1.05075e-05	1.08881e-05	6.14329e-06	3.20535e-05	7.31213e-06	3.62181e-06	1.66871e-05	1.78907e-05	7.74648e-06	0.000168045	12	Vesicle-trafficking protein SEC22b OS=Rattus norvegicus OX=10116 GN=Sec22b PE=1 SV=3
Prefrontal-cortex	P50408	Atp6v1f	0.000179378	0.000185482	0.000163015	8.07382e-05	0.000152207	0.000137474	0.00021023	0.000150819	0.000139126	0.000192852	0.000212424	0.000163051	0.0019668	12	V-type proton ATPase subunit F OS=Rattus norvegicus OX=10116 GN=Atp6v1f PE=1 SV=1
Prefrontal-cortex	Q6AXX6	Prxl2a	1.62408e-05	3.75307e-05	1.95149e-05	6.961e-06	1.14132e-05	7.12113e-06	2.47496e-05	7.3258e-06	2.00664e-05	1.7239e-05	1.43957e-05	1.256e-05	0.000195118	12	Peroxiredoxin-like 2A OS=Rattus norvegicus OX=10116 GN=Prxl2a PE=1 SV=1
Prefrontal-cortex	P25809	Ckmt1	0.000753295	0.000789028	0.00087329	0.000647094	0.00053889	0.000669456	0.000506648	0.000537024	0.000459876	0.000643335	0.000500539	0.00070983	0.0076283	12	Creatine kinase U-type, mitochondrial OS=Rattus norvegicus OX=10116 GN=Ckmt1 PE=1 SV=1
Prefrontal-cortex	P86252	Pura	0.000120388	0.000112779	9.76484e-05	6.52992e-05	7.09307e-05	0.000112768	7.73826e-05	9.14585e-05	7.46492e-05	9.96532e-05	0.00010389	0.000143178	0.00117003	12	Transcriptional activator protein Pur-alpha (Fragments) OS=Rattus norvegicus OX=10116 GN=Pura PE=1 SV=1
Prefrontal-cortex	Q920J4	Txnl1	8.45879e-05	6.0331e-05	7.73626e-05	5.19198e-05	7.8077e-05	8.87936e-05	6.26135e-05	7.49606e-05	8.67218e-05	6.9734e-05	8.23339e-05	7.42612e-05	0.000891697	12	Thioredoxin-like protein 1 OS=Rattus norvegicus OX=10116 GN=Txnl1 PE=1 SV=3
Prefrontal-cortex	Q68FU3	Etfb	4.83807e-05	5.12756e-05	2.65054e-05	2.70742e-05	2.49401e-05	3.75121e-05	2.08423e-05	3.70161e-05	2.02543e-05	2.46456e-05	4.28997e-05	4.67378e-05	0.000408084	12	Electron transfer flavoprotein subunit beta OS=Rattus norvegicus OX=10116 GN=Etfb PE=1 SV=3
Prefrontal-cortex	Q6MG60	Ddah2	2.04621e-05	1.1868e-05	6.52189e-06	5.20259e-06	8.1003e-06	1.10945e-05	2.89801e-06	1.37147e-05	8.73752e-06	9.71993e-06	5.66748e-06	2.06525e-05	0.00012464	12	N(G),N(G)-dimethylarginine dimethylaminohydrolase 2 OS=Rattus norvegicus OX=10116 GN=Ddah2 PE=1 SV=1
Prefrontal-cortex	Q62876	Syngr1	0.000130768	0.000370992		9.06784e-05	0.000163419	0.00012839	0.000250006	0.000154295	0.000137834	0.000189278	0.000210134	0.000131117	0.00195691	11	Synaptogyrin-1 OS=Rattus norvegicus OX=10116 GN=Syngr1 PE=1 SV=1
Prefrontal-cortex	P23565	Ina	0.000137627	0.000555776	0.000265482	5.24347e-05	0.000224967	0.000220796	0.00030535	0.00023374	0.000304087	0.000379328	0.000248968	0.000308736	0.00323729	12	Alpha-internexin OS=Rattus norvegicus OX=10116 GN=Ina PE=1 SV=2
Prefrontal-cortex	Q5PPH0	Enoph1	5.74937e-06	2.6524e-06	4.583e-06	4.57618e-06	1.4086e-05	1.98882e-05	7.03807e-06	1.06785e-05	1.20731e-05	1.20379e-05	6.45379e-06	1.52285e-05	0.000115045	12	Enolase-phosphatase E1 OS=Rattus norvegicus OX=10116 GN=Enoph1 PE=2 SV=1
Prefrontal-cortex	Q9Z2G8	Nap1l1	7.67774e-05	5.63068e-05	4.66537e-05	2.90769e-05	4.34335e-05	3.65242e-05	3.72096e-05	3.90223e-05	5.94697e-05	5.30328e-05	4.17312e-05	6.21288e-05	0.000581367	12	Nucleosome assembly protein 1-like 1 OS=Rattus norvegicus OX=10116 GN=Nap1l1 PE=1 SV=1
Prefrontal-cortex	P70500	Cdipt		2.9508e-05	1.03707e-05	6.3373e-06	5.24629e-06	2.73724e-06	1.55983e-05	5.0731e-06	5.0449e-07	5.72374e-06	8.0264e-06	1.88778e-06	9.10133e-05	11	CDP-diacylglycerol--inositol 3-phosphatidyltransferase OS=Rattus norvegicus OX=10116 GN=Cdipt PE=1 SV=1
Prefrontal-cortex	P28073	Psmb6	3.96533e-05	2.35399e-05	2.56752e-05	2.34508e-05	3.32494e-05	4.03791e-05	1.86815e-05	3.19584e-05	2.62871e-05	3.46069e-05	3.73001e-05	4.47719e-05	0.000379554	12	Proteasome subunit beta type-6 OS=Rattus norvegicus OX=10116 GN=Psmb6 PE=1 SV=3
Prefrontal-cortex	Q62825	Exoc3	9.5769e-07	5.10082e-06	2.37522e-06	0.000121486	5.41981e-06	2.99429e-06	1.0411e-05	7.23968e-06	4.26061e-06	1.19573e-06	9.54553e-07	0.000236661	0.000399057	12	Exocyst complex component 3 OS=Rattus norvegicus OX=10116 GN=Exoc3 PE=1 SV=1
Prefrontal-cortex	Q9WVA1	Timm8a	2.26449e-05	2.11794e-05	2.52718e-05	1.82509e-05	8.98067e-06	1.42971e-05	1.97919e-05	3.001e-05	1.96124e-05	2.04079e-05	2.31458e-05	3.23228e-05	0.000255916	12	Mitochondrial import inner membrane translocase subunit Tim8 A OS=Rattus norvegicus OX=10116 GN=Timm8a PE=1 SV=1
Prefrontal-cortex	P62828	Ran	8.11868e-05	4.23744e-05	4.74643e-05	3.73443e-05	6.21203e-05	4.5642e-05	5.60877e-05	6.57402e-05	6.40793e-05	6.93217e-05	4.77609e-05	6.35187e-05	0.00068264	12	GTP-binding nuclear protein Ran OS=Rattus norvegicus OX=10116 GN=Ran PE=1 SV=3
Prefrontal-cortex	Q9JKE3	Scamp5	5.56756e-05	0.0002513	0.000124282	5.00065e-05	8.30349e-05	7.94496e-05	0.000182156	3.97998e-05	7.67085e-05	8.76018e-05	7.95496e-05	6.33641e-05	0.00117293	12	Secretory carrier-associated membrane protein 5 OS=Rattus norvegicus OX=10116 GN=Scamp5 PE=2 SV=1
Prefrontal-cortex	P70483	Strn	4.03064e-06	2.99133e-06	1.05641e-05	9.76794e-06	9.23854e-06	1.74278e-05	1.15964e-05	7.07914e-06	4.67051e-06	5.88771e-06	7.2485e-06	9.88214e-06	0.000100385	12	Striatin OS=Rattus norvegicus OX=10116 GN=Strn PE=1 SV=1
Prefrontal-cortex	P37397	Cnn3	7.96799e-06	5.55536e-06	1.05474e-05	3.47931e-05	1.94493e-05	1.0678e-05	1.3381e-05	2.84383e-05		2.04657e-05	2.71859e-05	9.23363e-06	0.000187696	11	Calponin-3 OS=Rattus norvegicus OX=10116 GN=Cnn3 PE=1 SV=1
Prefrontal-cortex	P05765	Rps21	3.35314e-05	3.819e-05	4.04158e-05	2.57927e-05	2.1748e-05	4.00997e-05	3.8282e-05	1.93409e-05	1.65532e-05	3.78912e-05	4.95052e-05	4.15355e-05	0.000402886	12	40S ribosomal protein S21 OS=Rattus norvegicus OX=10116 GN=Rps21 PE=1 SV=1
Prefrontal-cortex	Q5M9G3	Caprin1	3.57319e-06	9.49249e-06	1.56566e-05	8.24947e-06	7.88643e-06	1.13911e-05	2.03002e-05	7.694e-06	6.20468e-06	2.61941e-05	9.59013e-06	1.05537e-05	0.000136786	12	Caprin-1 OS=Rattus norvegicus OX=10116 GN=Caprin1 PE=1 SV=2
Prefrontal-cortex	Q704S8	Crat	4.73599e-06		6.66127e-06	1.7203e-05	4.15796e-07	1.31823e-06	1.12555e-05			5.11242e-06	4.77657e-06	3.61952e-06	5.50983e-05	9	Carnitine O-acetyltransferase OS=Rattus norvegicus OX=10116 GN=Crat PE=1 SV=1
Prefrontal-cortex	P17702	Rpl28			4.46201e-06	4.7953e-07	3.82786e-06	6.78623e-06	2.45321e-06	1.31442e-06	2.97454e-07	7.50385e-06	1.1394e-05	5.22131e-06	4.37399e-05	10	60S ribosomal protein L28 OS=Rattus norvegicus OX=10116 GN=Rpl28 PE=1 SV=4
Prefrontal-cortex	Q6NX65	Pdcd10			7.00334e-06	6.25921e-06	8.3375e-06	8.47378e-06	2.65505e-06	2.6794e-06		7.53725e-06	8.90766e-06	0.000611474	0.000663327	9	Programmed cell death protein 10 OS=Rattus norvegicus OX=10116 GN=Pdcd10 PE=2 SV=1
Prefrontal-cortex	P11240	Cox5a	7.42673e-05	8.16476e-05	3.08943e-05	2.27661e-05	1.14306e-05	7.20681e-05	3.43897e-05			2.06923e-05	5.0409e-06		0.000353197	9	Cytochrome c oxidase subunit 5A, mitochondrial OS=Rattus norvegicus OX=10116 GN=Cox5a PE=1 SV=1
Prefrontal-cortex	Q63065	Pdk1	7.53314e-06		3.04186e-05	6.94847e-06	1.61144e-06	1.78854e-06	1.37614e-06	4.9303e-06	6.00825e-06	2.0788e-06	5.06836e-06	5.13975e-06	7.29018e-05	11	[Pyruvate dehydrogenase (acetyl-transferring)] kinase isozyme 1, mitochondrial OS=Rattus norvegicus OX=10116 GN=Pdk1 PE=1 SV=1
Prefrontal-cortex	D3ZFB6	Prrt2	5.32523e-06	6.87517e-06		7.40938e-07	1.23664e-05			1.33998e-05	1.39168e-05	7.24799e-06	1.29556e-05		7.2828e-05	8	Proline-rich transmembrane protein 2 OS=Rattus norvegicus OX=10116 GN=Prrt2 PE=1 SV=1
Prefrontal-cortex	Q80W92	Vac14	2.74607e-06	9.77764e-08	1.77768e-06	1.03446e-06	1.23845e-06	1.11108e-07	2.27611e-06	1.21724e-06	2.67835e-06	2.84712e-06	1.85637e-06	3.23512e-06	2.11159e-05	12	Protein VAC14 homolog OS=Rattus norvegicus OX=10116 GN=Vac14 PE=1 SV=1
Prefrontal-cortex	Q63484	Akt3		3.55569e-06		2.16194e-06	2.86186e-06			4.0585e-06	2.23808e-06		1.78817e-06	4.06504e-06	2.07293e-05	7	RAC-gamma serine/threonine-protein kinase OS=Rattus norvegicus OX=10116 GN=Akt3 PE=2 SV=2
Prefrontal-cortex	O09178	Ampd3	2.00889e-07		1.21275e-06	1.20448e-06	8.83881e-07	1.82655e-06	1.02456e-06			1.93946e-06	4.45356e-06		1.27461e-05	8	AMP deaminase 3 OS=Rattus norvegicus OX=10116 GN=Ampd3 PE=1 SV=2
Prefrontal-cortex	Q66HF1	Ndufs1	8.02512e-07	6.48422e-06	3.39672e-06	3.26629e-06	5.67559e-06	1.25018e-06	1.0267e-06			1.96806e-05	1.01662e-06	5.552e-06	4.81514e-05	10	NADH-ubiquinone oxidoreductase 75 kDa subunit, mitochondrial OS=Rattus norvegicus OX=10116 GN=Ndufs1 PE=1 SV=1
Prefrontal-cortex	G3V7P1	Stx12		4.54736e-06	3.70548e-06	5.97297e-07	2.04236e-06		9.50358e-06		7.76522e-07	3.49692e-06	3.93511e-06	1.41401e-06	3.00186e-05	9	Syntaxin-12 OS=Rattus norvegicus OX=10116 GN=Stx12 PE=1 SV=1
Prefrontal-cortex	P60825	Cirbp		2.00894e-06	2.12133e-06	1.20521e-06			3.7021e-06	6.61169e-07		2.86892e-06	5.31715e-06	3.60437e-06	2.14892e-05	8	Cold-inducible RNA-binding protein OS=Rattus norvegicus OX=10116 GN=Cirbp PE=2 SV=1
Prefrontal-cortex	O08629	Trim28	3.8823e-06	5.5999e-06	8.9199e-06	1.2945e-05	8.58664e-06	8.93401e-06	1.72209e-05	5.85804e-05	5.74006e-06	1.66261e-05	3.44985e-05	1.3667e-05	0.000195201	12	Transcription intermediary factor 1-beta OS=Rattus norvegicus OX=10116 GN=Trim28 PE=1 SV=2
Prefrontal-cortex	O08815	Slk	3.43044e-06		1.09761e-05	5.16604e-07	2.65669e-06	2.44107e-06	5.51934e-06	1.53483e-05	4.16791e-06	9.39376e-06	9.81565e-06	1.17463e-05	7.60122e-05	11	STE20-like serine/threonine-protein kinase OS=Rattus norvegicus OX=10116 GN=Slk PE=1 SV=1
Prefrontal-cortex	Q32PX7	Fubp1			2.99145e-06	2.22981e-06	2.78992e-06	5.65273e-06	1.15477e-05			5.96137e-06	7.6449e-06	4.77233e-06	4.35903e-05	8	Far upstream element-binding protein 1 OS=Rattus norvegicus OX=10116 GN=Fubp1 PE=1 SV=1
Prefrontal-cortex	O35263	Pafah1b3			1.78332e-06	1.80316e-06	9.63975e-07		1.27578e-06	5.87996e-06	1.99033e-05	3.40096e-06	5.63021e-06	2.59334e-05	6.6574e-05	9	Platelet-activating factor acetylhydrolase IB subunit alpha1 OS=Rattus norvegicus OX=10116 GN=Pafah1b3 PE=1 SV=1
Prefrontal-cortex	P63081	Atp6v0c	5.1018e-07	1.98506e-05	1.18944e-05	6.96028e-06	2.83149e-06		1.86249e-05	2.09023e-06	1.60632e-06	1.3107e-06	8.8167e-06		7.44958e-05	10	V-type proton ATPase 16 kDa proteolipid subunit c OS=Rattus norvegicus OX=10116 GN=Atp6v0c PE=1 SV=1
Prefrontal-cortex	Q5U2Q7	Etf1				1.97471e-06	1.78134e-06	7.54848e-07	3.80681e-06	3.15776e-05		2.96357e-06	1.0461e-05	4.64907e-06	5.7969e-05	8	Eukaryotic peptide chain release factor subunit 1 OS=Rattus norvegicus OX=10116 GN=Etf1 PE=2 SV=3
Prefrontal-cortex	O35550	Rabep1			7.72452e-07	1.80173e-06	1.80812e-06	1.22574e-06	3.87329e-07	1.01078e-05	1.00064e-05	1.2805e-05	4.05319e-06		4.29678e-05	9	Rab GTPase-binding effector protein 1 OS=Rattus norvegicus OX=10116 GN=Rabep1 PE=1 SV=1
Prefrontal-cortex	P81155	Vdac2		0.000104528	1.29718e-05	3.21633e-06	2.76695e-05	2.72744e-06	7.51e-06			3.83136e-05	1.45424e-06		0.000198391	8	Voltage-dependent anion-selective channel protein 2 OS=Rattus norvegicus OX=10116 GN=Vdac2 PE=1 SV=2
Prefrontal-cortex	P04218	Cd200		1.8723e-05	1.92224e-05	1.47721e-06		4.51344e-06	1.80203e-05	1.7646e-06		4.36361e-06	5.59285e-06	4.30238e-06	7.79798e-05	9	OX-2 membrane glycoprotein OS=Rattus norvegicus OX=10116 GN=Cd200 PE=2 SV=1
Prefrontal-cortex	P49088	Asns	2.26816e-06		7.91721e-07	2.06757e-06	8.43818e-07	4.92618e-06	1.91618e-06	4.39932e-06		1.78867e-06	3.27903e-06	4.6232e-06	2.69039e-05	10	Asparagine synthetase [glutamine-hydrolyzing] OS=Rattus norvegicus OX=10116 GN=Asns PE=2 SV=3
Prefrontal-cortex	Q9JJK1	Gpm6b		6.39592e-05	5.51454e-05	2.25739e-05	1.6378e-05	2.08566e-05	4.98576e-05	8.87277e-06	1.36427e-05	3.78781e-05	1.89256e-05		0.00030809	10	Neuronal membrane glycoprotein M6-b OS=Rattus norvegicus OX=10116 GN=Gpm6b PE=1 SV=1
Prefrontal-cortex	P56603	Scamp1		1.59544e-05	1.14979e-05	3.83142e-06	6.00674e-06	3.44722e-06	1.46755e-05	4.17038e-05		1.17891e-05	8.97882e-06	2.78953e-05	0.00014578	10	Secretory carrier-associated membrane protein 1 OS=Rattus norvegicus OX=10116 GN=Scamp1 PE=1 SV=1
Prefrontal-cortex	B0K020	Cisd1		8.16129e-06	2.28215e-05		1.17974e-05		1.42415e-05			2.02363e-05	5.81296e-06		8.30709e-05	6	CDGSH iron-sulfur domain-containing protein 1 OS=Rattus norvegicus OX=10116 GN=Cisd1 PE=3 SV=1
Prefrontal-cortex	Q6AY65	Arfip2			5.16072e-06	5.59524e-06	5.25117e-05	5.3957e-05	2.38606e-05	4.02346e-05	4.38648e-06	7.55789e-05	4.16223e-05	9.88505e-06	0.000312793	10	Arfaptin-2 OS=Rattus norvegicus OX=10116 GN=Arfip2 PE=2 SV=1
Prefrontal-cortex	P12075	Cox5b			8.95571e-06	4.71395e-06	1.48677e-05	8.15366e-06	9.34901e-06			1.83924e-05	4.11189e-06		6.85443e-05	7	Cytochrome c oxidase subunit 5B, mitochondrial OS=Rattus norvegicus OX=10116 GN=Cox5b PE=1 SV=2
Prefrontal-cortex	O35867	Ppp1r9a		1.01732e-05	1.1207e-05	1.70942e-05	3.89259e-05	4.28334e-06	2.28613e-05	5.8271e-06	3.29704e-06	1.47405e-05	2.26106e-06	4.68752e-06	0.000135358	11	Neurabin-1 OS=Rattus norvegicus OX=10116 GN=Ppp1r9a PE=1 SV=1
Prefrontal-cortex	P27274	Cd59		6.97579e-05	1.86895e-05		3.86179e-06		2.08594e-05			1.42539e-05	1.4857e-05		0.000142279	6	CD59 glycoprotein OS=Rattus norvegicus OX=10116 GN=Cd59 PE=1 SV=2
Prefrontal-cortex	Q3B8Q2	Eif4a3		1.21845e-06	2.56411e-06		2.35757e-05	8.33888e-06	9.72877e-06	3.55984e-06	1.08356e-06	2.85956e-06	3.07628e-06	3.39791e-06	5.94031e-05	10	Eukaryotic initiation factor 4A-III OS=Rattus norvegicus OX=10116 GN=Eif4a3 PE=1 SV=1
Prefrontal-cortex	Q9Z1A6	Hdlbp		6.1808e-07	2.37781e-06	2.30297e-06	1.34307e-06	1.69415e-06				2.121e-06	1.91266e-06	2.13183e-05	3.36881e-05	8	Vigilin OS=Rattus norvegicus OX=10116 GN=Hdlbp PE=1 SV=1
Prefrontal-cortex	P61765	Stxbp1				5.09038e-05	7.10704e-05	7.36245e-05		6.82595e-05	0.000109595	0.000126331	0.000143617		0.000643402	7	Syntaxin-binding protein 1 OS=Rattus norvegicus OX=10116 GN=Stxbp1 PE=1 SV=1
Prefrontal-cortex	P62845	Rps15			2.07529e-05		1.35891e-05	2.20534e-05	1.73956e-05	1.31004e-05		1.85436e-05	2.43642e-05	8.85885e-07	0.000130685	8	40S ribosomal protein S15 OS=Rattus norvegicus OX=10116 GN=Rps15 PE=1 SV=2
Prefrontal-cortex	Q9Z1Z3	Epn2			2.71446e-06		1.94249e-06	2.83571e-06	4.69431e-06	3.70846e-06			4.55486e-06		2.04503e-05	6	Epsin-2 OS=Rattus norvegicus OX=10116 GN=Epn2 PE=1 SV=1
Prefrontal-cortex	Q8VIL3	Zwint				2.32908e-06	2.19025e-06	8.67244e-06	1.87707e-05	1.58072e-05	1.27807e-06	1.60191e-05	1.26202e-05	7.79984e-06	8.5487e-05	9	ZW10 interactor OS=Rattus norvegicus OX=10116 GN=Zwint PE=1 SV=1
Prefrontal-cortex	P63249	Pkia				2.73317e-06	1.44056e-06	2.84308e-06			1.73884e-06	1.78809e-06	1.72113e-06		1.22649e-05	6	cAMP-dependent protein kinase inhibitor alpha OS=Rattus norvegicus OX=10116 GN=Pkia PE=1 SV=2
Prefrontal-cortex	P37377	Snca			6.01544e-07	2.26813e-06	6.62808e-06	3.5077e-06	3.44656e-06			4.13333e-06	2.90219e-06		2.34875e-05	7	Alpha-synuclein OS=Rattus norvegicus OX=10116 GN=Snca PE=1 SV=1
Prefrontal-cortex	Q9JK25	Clip1				3.35905e-07	4.55131e-06	4.21835e-06	6.13114e-06	5.69324e-06		6.72022e-06	2.97893e-06		3.06291e-05	7	CAP-Gly domain-containing linker protein 1 OS=Rattus norvegicus OX=10116 GN=Clip1 PE=1 SV=2
Prefrontal-cortex	Q66X93	Snd1		2.63925e-06	1.14116e-06	1.97262e-06		3.29189e-06	2.80525e-06	4.74977e-06		1.5891e-05		2.86028e-06	3.53513e-05	8	Staphylococcal nuclease domain-containing protein 1 OS=Rattus norvegicus OX=10116 GN=Snd1 PE=1 SV=1
Prefrontal-cortex	D4A208	Srgap2		5.3767e-06		2.34786e-06	2.00884e-06	2.89006e-06	2.99925e-06			3.97837e-06		4.95355e-06	2.45546e-05	7	SLIT-ROBO Rho GTPase-activating protein 2 OS=Rattus norvegicus OX=10116 GN=Srgap2 PE=1 SV=1
Prefrontal-cortex	P13234	Camk4	3.57844e-05	5.2003e-05	7.36365e-05	2.63652e-05	6.16117e-05	1.48407e-05	3.94278e-05	2.67564e-05	6.74669e-05	3.55599e-05		6.52017e-05	0.000498654	11	Calcium/calmodulin-dependent protein kinase type IV OS=Rattus norvegicus OX=10116 GN=Camk4 PE=1 SV=3
Prefrontal-cortex	Q921A4	Cygb	4.44363e-06			7.47704e-07	6.92341e-07	1.08053e-06		2.2437e-06		1.6545e-06		2.23051e-06	1.30929e-05	7	Cytoglobin OS=Rattus norvegicus OX=10116 GN=Cygb PE=1 SV=1
Prefrontal-cortex	P23978	Slc6a1		2.13988e-05	1.57138e-05	3.86073e-06		4.40674e-06	1.79515e-05			1.16129e-05		8.55325e-07	7.57998e-05	7	Sodium- and chloride-dependent GABA transporter 1 OS=Rattus norvegicus OX=10116 GN=Slc6a1 PE=1 SV=1
Prefrontal-cortex	Q66H62	Cyld	2.03216e-06	0.000230546	2.14224e-06	4.67233e-06	2.19111e-06	1.78002e-06		1.37987e-06	9.88732e-07	2.25502e-06		1.49606e-07	0.000248137	10	Ubiquitin carboxyl-terminal hydrolase CYLD OS=Rattus norvegicus OX=10116 GN=Cyld PE=1 SV=1
Prefrontal-cortex	A1L108	Arpc5l			1.36153e-06	2.96452e-06	5.42351e-06	4.07234e-06	3.62587e-06		2.89817e-06	2.89562e-06			2.32416e-05	7	Actin-related protein 2/3 complex subunit 5-like protein OS=Rattus norvegicus OX=10116 GN=Arpc5l PE=1 SV=2
Prefrontal-cortex	Q6I7R3	Isoc1	9.49893e-07			9.5545e-07		1.98377e-06	2.66394e-06	1.34017e-06		1.70472e-06		3.34392e-06	1.29419e-05	7	Isochorismatase domain-containing protein 1 OS=Rattus norvegicus OX=10116 GN=Isoc1 PE=1 SV=1
Prefrontal-cortex	O55166	Vps52	9.646e-06	4.18457e-07	8.91147e-08	4.23129e-05		1.57007e-07	9.30903e-07		1.84617e-07	6.7489e-07		1.46909e-07	5.45608e-05	9	Vacuolar protein sorting-associated protein 52 homolog OS=Rattus norvegicus OX=10116 GN=Vps52 PE=1 SV=2
Prefrontal-cortex	Q80W83	Ppp2r5b	1.06181e-05		2.13203e-05		1.17831e-05	8.19509e-06		6.73303e-06	6.37491e-06	5.86926e-06		1.07974e-05	8.16913e-05	8	Serine/threonine-protein phosphatase 2A 56 kDa regulatory subunit beta isoform OS=Rattus norvegicus OX=10116 GN=Ppp2r5b PE=2 SV=1
Prefrontal-cortex	Q5FVQ9	Tbce	6.22542e-06			3.50413e-06	4.89525e-06	6.82418e-06		3.25692e-06	1.97146e-06	3.23995e-06		4.07666e-06	3.3994e-05	8	Tubulin-specific chaperone E OS=Rattus norvegicus OX=10116 GN=Tbce PE=2 SV=1
Prefrontal-cortex	Q5BJP3	Ufm1	4.67492e-06	4.22626e-06	5.62728e-06	4.34306e-06	1.00583e-05	9.05116e-06		8.23668e-06	6.86907e-06	5.2954e-06		5.28504e-06	6.36672e-05	10	Ubiquitin-fold modifier 1 OS=Rattus norvegicus OX=10116 GN=Ufm1 PE=3 SV=1
Prefrontal-cortex	Q9WUC4	Atox1	2.25106e-05	1.14206e-05	2.56989e-05	2.86583e-05	2.40642e-05	1.39706e-05	1.42492e-06		1.12496e-05	1.79696e-05		1.44314e-05	0.000171399	10	Copper transport protein ATOX1 OS=Rattus norvegicus OX=10116 GN=Atox1 PE=1 SV=1
Prefrontal-cortex	Q6AYR6	Hdhd2	2.95119e-05	1.44592e-05	5.54321e-06	5.17548e-06	5.4941e-06	7.20915e-06		1.51901e-05	1.5658e-05	1.0436e-05		2.58088e-05	0.000134486	10	Haloacid dehalogenase-like hydrolase domain-containing protein 2 OS=Rattus norvegicus OX=10116 GN=Hdhd2 PE=2 SV=1
Prefrontal-cortex	A0A0G2JUG7	Iqsec1	3.17521e-06	1.85615e-05	5.56939e-06	5.53734e-06	4.3639e-06	3.10776e-06	3.99769e-06	4.11705e-05		9.75737e-06		7.64732e-07	9.60054e-05	10	IQ motif and SEC7 domain-containing protein 1 OS=Rattus norvegicus OX=10116 GN=Iqsec1 PE=1 SV=1
Prefrontal-cortex	B5DEN9	Vps28		1.56615e-07	7.7512e-07	1.28096e-06	5.83076e-07	2.29597e-06	8.56222e-07	2.03249e-06		7.90788e-07			8.77124e-06	8	Vacuolar protein sorting-associated protein 28 homolog OS=Rattus norvegicus OX=10116 GN=Vps28 PE=2 SV=1
Prefrontal-cortex	Q63635	Stx6		5.45769e-06	2.86483e-05			9.27669e-07	2.31149e-06	5.06279e-07		3.81412e-06			4.16655e-05	6	Syntaxin-6 OS=Rattus norvegicus OX=10116 GN=Stx6 PE=1 SV=1
Prefrontal-cortex	P51146	Rab4b			1.50268e-06	2.70018e-06	4.45324e-06		4.22574e-06	2.9788e-06		3.05171e-06			1.89124e-05	6	Ras-related protein Rab-4B OS=Rattus norvegicus OX=10116 GN=Rab4b PE=2 SV=1
Prefrontal-cortex	F1LP90	Mink1	3.52446e-06	6.62812e-06	8.73833e-07	4.00815e-06	2.71655e-06	5.36959e-06	7.57078e-06	1.03887e-05				3.05448e-06	4.41346e-05	9	Misshapen-like kinase 1 OS=Rattus norvegicus OX=10116 GN=Mink1 PE=1 SV=2
Prefrontal-cortex	Q99ND9	Rwdd1	6.94507e-06	3.22083e-06				2.22407e-06		3.16481e-07	3.65272e-06			3.55794e-06	1.99171e-05	6	RWD domain-containing protein 1 OS=Rattus norvegicus OX=10116 GN=Rwdd1 PE=2 SV=1
Prefrontal-cortex	P70619	Gsr	5.71099e-06		5.39097e-06	5.65642e-06		3.93751e-06	5.58246e-06	5.79896e-06	5.53558e-06			3.66173e-06	4.12746e-05	8	Glutathione reductase (Fragment) OS=Rattus norvegicus OX=10116 GN=Gsr PE=2 SV=2
Prefrontal-cortex	Q6IRE4	Tsg101	4.32126e-06	5.65211e-06		2.47516e-06	3.7671e-06	4.57315e-06		1.77471e-06	8.16192e-06			4.17614e-06	3.49015e-05	8	Tumor susceptibility gene 101 protein OS=Rattus norvegicus OX=10116 GN=Tsg101 PE=1 SV=1
Prefrontal-cortex	Q641Z2	Ptpn9	2.38002e-06	1.50754e-06		1.09599e-06	4.74445e-07			1.33637e-06	2.03156e-06			7.8682e-07	9.61273e-06	7	Tyrosine-protein phosphatase non-receptor type 9 OS=Rattus norvegicus OX=10116 GN=Ptpn9 PE=2 SV=1
Prefrontal-cortex	P51111	Htt	1.13079e-05	1.35555e-05	2.21554e-06		1.29616e-06		1.43437e-06	3.25071e-06	2.43171e-06			8.26302e-06	4.37549e-05	8	Huntingtin OS=Rattus norvegicus OX=10116 GN=Htt PE=1 SV=1
Prefrontal-cortex	Q5PQJ6	Pycr3	2.62488e-06		3.55491e-06	1.14782e-05	2.17753e-05	4.18663e-06	4.91523e-06	7.07607e-06	2.72982e-06				5.8341e-05	8	Pyrroline-5-carboxylate reductase 3 OS=Rattus norvegicus OX=10116 GN=Pycr3 PE=2 SV=1
Prefrontal-cortex	P49621	Dgkb	3.16869e-05	7.3971e-06	1.7893e-06				5.35914e-06	5.90168e-06	2.75701e-05				7.97041e-05	6	Diacylglycerol kinase beta OS=Rattus norvegicus OX=10116 GN=Dgkb PE=1 SV=1
Hippocampus	P30904	Mif	0.000156053	0.000241716	0.000831078	0.000828467	0.000145127	0.000361487	0.000575296	0.000706098	0.000492374	0.000249716	0.000448657	0.000207411	0.00524348	12	Macrophage migration inhibitory factor OS=Rattus norvegicus OX=10116 GN=Mif PE=1 SV=4
Hippocampus	Q05683	Gad2	0.000166279	0.000147265	9.78442e-05	0.000132911	0.00015098	0.000128789	0.000135651	0.000185958	0.000188172	0.000177266	0.000105273	0.00019863	0.00181502	12	Glutamate decarboxylase 2 OS=Rattus norvegicus OX=10116 GN=Gad2 PE=1 SV=1
Hippocampus	P34926	Map1a	0.000828295	0.000876244	0.00071077	0.00075665	0.000930813	0.00101931	0.000854015	0.000899635	0.000613559	0.000978152	0.00087729	0.000859085	0.0102038	12	Microtubule-associated protein 1A OS=Rattus norvegicus OX=10116 GN=Map1a PE=1 SV=1
Hippocampus	P08413	Camk2b	0.00037333	0.000623709	0.000284202	0.000355415	0.000209046	0.000266728	0.00034664	0.000414946	0.000262307	0.000269269	0.000125498	0.000223115	0.0037542	12	Calcium/calmodulin-dependent protein kinase type II subunit beta OS=Rattus norvegicus OX=10116 GN=Camk2b PE=1 SV=1
Hippocampus	P28480	Tcp1	0.000217863	0.000218152	0.00017194	0.00026291	0.000258995	0.000168703	0.000270198	0.000205275	0.000223851	0.000137328	0.000198956	0.000219007	0.00255318	12	T-complex protein 1 subunit alpha OS=Rattus norvegicus OX=10116 GN=Tcp1 PE=1 SV=1
Hippocampus	P63018	Hspa8	0.00180965	0.0022041	0.00182057	0.00188727	0.00199797	0.00183021	0.00165775	0.00159724	0.0017486	0.00291372	0.00174949	0.00209342	0.02331	12	Heat shock cognate 71 kDa protein OS=Rattus norvegicus OX=10116 GN=Hspa8 PE=1 SV=1
Hippocampus	Q08163	Cap1	0.000315102	0.000324954	0.000263956	0.000280764	0.000383792	0.000402722	0.000307338	0.000276996	0.000262789	0.000360725	0.000308045	0.000313617	0.0038008	12	Adenylyl cyclase-associated protein 1 OS=Rattus norvegicus OX=10116 GN=Cap1 PE=1 SV=3
Hippocampus	P10111	Ppia	0.0044697	0.00473948	0.00395228	0.00382423	0.00333872	0.00270808	0.00310574	0.00269708	0.00331289	0.0041827	0.00281634	0.00361387	0.0427611	12	Peptidyl-prolyl cis-trans isomerase A OS=Rattus norvegicus OX=10116 GN=Ppia PE=1 SV=2
Hippocampus	P34058	Hsp90ab1	0.000882663	0.000947062	0.00083682	0.000974476	0.000913183	0.00057859	0.000572747	0.000818402	0.000970154	0.000816014	0.000717351	0.000987938	0.0100154	12	Heat shock protein HSP 90-beta OS=Rattus norvegicus OX=10116 GN=Hsp90ab1 PE=1 SV=4
Hippocampus	B2RYG6	Otub1	0.000418279	0.000353844	0.000376124	0.00042181	0.000282888	0.000260612	0.000307234	0.000322099	0.000310174	0.000177011	0.000294727	0.000404455	0.00392926	12	Ubiquitin thioesterase OTUB1 OS=Rattus norvegicus OX=10116 GN=Otub1 PE=1 SV=1
Hippocampus	Q6NYB7	Rab1A	5.29225e-05	5.36046e-05	2.1925e-05	2.89826e-05	3.94022e-05	2.81157e-05	3.99926e-05	2.23742e-05	2.84456e-05	3.63045e-05	2.79669e-05	4.81811e-05	0.000428217	12	Ras-related protein Rab-1A OS=Rattus norvegicus OX=10116 GN=Rab1A PE=1 SV=3
Hippocampus	Q8VHF5	Cs	0.000977076	0.00120915	0.000866437	0.000745056	0.00106852	0.000513697	0.000847658	0.000798466	0.000566385	0.000998575	0.000684406	0.0011174	0.0103928	12	Citrate synthase, mitochondrial OS=Rattus norvegicus OX=10116 GN=Cs PE=1 SV=1
Hippocampus	B2GV06	Oxct1	0.000133188	9.57575e-05	8.58239e-05	9.95169e-05	0.000141111	9.46371e-05	5.48425e-05	3.20168e-05	2.39603e-05	0.000102852	7.23366e-05	0.000150304	0.00108635	12	Succinyl-CoA:3-ketoacid coenzyme A transferase 1, mitochondrial OS=Rattus norvegicus OX=10116 GN=Oxct1 PE=1 SV=1
Hippocampus	P60881	Snap25	4.64064e-05		2.11777e-05	2.07508e-05	5.24459e-05	1.49433e-05	5.77277e-05	5.08554e-05	4.88468e-05	2.3712e-05	3.15929e-05	2.38882e-05	0.000392347	11	Synaptosomal-associated protein 25 OS=Rattus norvegicus OX=10116 GN=Snap25 PE=1 SV=1
Hippocampus	P55067	Ncan	0.000145288	0.000137138	0.000113716	0.000156033	0.00024487	0.000120309	0.000229257	0.00029312	0.000230637	0.000229735	0.000232585	0.000171746	0.00230443	12	Neurocan core protein OS=Rattus norvegicus OX=10116 GN=Ncan PE=1 SV=1
Hippocampus	Q9QXQ0	Actn4	8.93457e-05	6.77211e-05	3.76432e-05	3.85284e-05	6.68068e-05	5.29461e-05	6.91044e-05	7.31467e-05	0.000137876	5.72731e-05	2.4599e-05	6.20136e-05	0.000777004	12	Alpha-actinin-4 OS=Rattus norvegicus OX=10116 GN=Actn4 PE=1 SV=2
Hippocampus	Q4FZT2	Ppme1	7.07268e-05	5.61395e-05	5.56388e-05	7.77168e-05	3.83919e-05	3.24573e-05	3.02583e-05	5.11283e-05	9.46312e-05	3.63502e-05	4.04619e-05	5.76055e-05	0.000641507	12	Protein phosphatase methylesterase 1 OS=Rattus norvegicus OX=10116 GN=Ppme1 PE=1 SV=2
Hippocampus	P17764	Acat1	0.000163239	0.000157721	0.000183077	0.000221222	0.000251612	0.000146314	0.000247548	0.000194946	0.000176286	0.000291463	0.000246078	0.000259533	0.00253904	12	Acetyl-CoA acetyltransferase, mitochondrial OS=Rattus norvegicus OX=10116 GN=Acat1 PE=1 SV=1
Hippocampus	Q91Y78	Uchl3	8.29599e-05	0.000178043	8.49943e-06	0.000102589	1.9462e-05	8.44489e-06	7.98678e-06	6.75852e-06	6.71166e-06	5.13511e-06	4.6556e-06	7.98973e-06	0.000439236	12	Ubiquitin carboxyl-terminal hydrolase isozyme L3 OS=Rattus norvegicus OX=10116 GN=Uchl3 PE=1 SV=1
Hippocampus	P27139	Ca2	0.000297526	0.000299957	0.000320834	0.000288394	0.000311932	0.000264988	0.000154522	0.00017288	0.000142559	0.000288964	0.000228133	0.000217674	0.00298836	12	Carbonic anhydrase 2 OS=Rattus norvegicus OX=10116 GN=Ca2 PE=1 SV=2
Hippocampus	Q6P7B0	Wars1	4.19402e-05	7.80035e-05	7.16432e-05	5.41437e-05	4.32006e-05	4.39066e-05	8.12638e-05	8.74577e-05	4.86896e-05	6.06925e-05	4.53627e-05	7.62496e-05	0.000732554	12	Tryptophan--tRNA ligase, cytoplasmic OS=Rattus norvegicus OX=10116 GN=Wars1 PE=1 SV=2
Hippocampus	Q6PST4	Atl1	6.21696e-05	8.44598e-05	6.76299e-05	9.5548e-05	9.08196e-05	7.03988e-05	0.000117306	7.12823e-05	8.26004e-05	5.76067e-05	4.28687e-05	0.000107801	0.000950491	12	Atlastin-1 OS=Rattus norvegicus OX=10116 GN=Atl1 PE=1 SV=1
Hippocampus	P23358	Rpl12	4.11094e-05	6.53177e-05	4.38978e-05	3.71511e-05	7.59335e-05	6.60713e-05	9.80597e-05	6.22555e-05	8.43838e-05	5.08926e-05	5.10278e-05	5.77771e-05	0.000733877	12	60S ribosomal protein L12 OS=Rattus norvegicus OX=10116 GN=Rpl12 PE=2 SV=1
Hippocampus	P63029	Tpt1	3.9423e-05	4.10216e-05	7.61941e-05	8.22926e-05	3.2082e-05	8.07056e-05	5.9795e-05	6.08504e-05	0.000117949	9.42174e-05	5.80121e-05	4.07368e-05	0.000783279	12	Translationally-controlled tumor protein OS=Rattus norvegicus OX=10116 GN=Tpt1 PE=1 SV=1
Hippocampus	Q63570	Psmc4	2.94139e-05	3.24575e-05	1.14619e-05	7.18542e-06	2.77002e-05	1.64385e-05	1.47405e-05	4.53509e-06	1.58755e-05	1.19429e-05	1.41175e-05	3.71357e-05	0.000223005	12	26S proteasome regulatory subunit 6B OS=Rattus norvegicus OX=10116 GN=Psmc4 PE=1 SV=1
Hippocampus	P13596	Ncam1	0.0001929	0.000182885	0.000153058	0.000152032	0.000290193	0.000140508	0.0004145	0.000436662	0.000257523	0.000262003	0.000350731	0.000213667	0.00304666	12	Neural cell adhesion molecule 1 OS=Rattus norvegicus OX=10116 GN=Ncam1 PE=1 SV=1
Hippocampus	Q5XI78	Ogdh	0.000245014	0.000334455	0.000122418	0.000148935	0.000307828	0.00024437	0.000380696	0.000401736	0.000290812	0.000137253	0.000322958	0.000321463	0.00325794	12	2-oxoglutarate dehydrogenase, mitochondrial OS=Rattus norvegicus OX=10116 GN=Ogdh PE=1 SV=1
Hippocampus	D3ZW55	Itpa	0.000101267	0.000101304	7.49468e-05	0.000103585	7.12036e-05	0.000108712	5.18033e-05	5.91905e-05	5.34169e-05	6.99853e-05	6.11481e-05	0.000100155	0.000956718	12	Inosine triphosphate pyrophosphatase OS=Rattus norvegicus OX=10116 GN=Itpa PE=3 SV=1
Hippocampus	Q05982	Nme1	0.000193145	0.000165271	0.000136664	0.000127129	0.000176327	0.000125023	0.000194431	0.000199995	0.000351208	0.000204571	0.000216241	0.000236108	0.00232611	12	Nucleoside diphosphate kinase A OS=Rattus norvegicus OX=10116 GN=Nme1 PE=1 SV=1
Hippocampus	P05712	Rab2a	0.000216506	0.000252228	0.000159447	0.000218096	0.000179025	0.0001588	0.000346503	0.000280684	0.000217732	0.000236159	0.000244987	0.00021566	0.00272583	12	Ras-related protein Rab-2A OS=Rattus norvegicus OX=10116 GN=Rab2a PE=2 SV=1
Hippocampus	P10687	Plcb1	0.000131698	3.14602e-05	4.87323e-05	2.61978e-05	2.3999e-05	2.17666e-05	0.000121392	8.15279e-05	6.67575e-05	5.86737e-05	5.08746e-05	4.51885e-05	0.000708268	12	1-phosphatidylinositol 4,5-bisphosphate phosphodiesterase beta-1 OS=Rattus norvegicus OX=10116 GN=Plcb1 PE=1 SV=1
Hippocampus	Q9Z272	Git1	2.1344e-05	2.5206e-05	2.43378e-05	2.28093e-05	2.89062e-05	1.88757e-05	4.04597e-05	1.68631e-05	1.22391e-05	1.98272e-05	1.02115e-05	1.24677e-05	0.000253547	12	ARF GTPase-activating protein GIT1 OS=Rattus norvegicus OX=10116 GN=Git1 PE=1 SV=1
Hippocampus	P09812	Pygm	0.000158091	0.000132927	0.000182264	0.000180048	0.000176578	0.000167164	0.000113604	7.13455e-05	8.27555e-05	0.000213912	0.000158719	0.000175709	0.00181312	12	Glycogen phosphorylase, muscle form OS=Rattus norvegicus OX=10116 GN=Pygm PE=1 SV=5
Hippocampus	Q9QWN8	Sptbn2	0.000916129	0.000685993	0.000645766	0.000452556	0.000627513	0.000580029	0.00180403	0.0011265	0.00150365	0.000797018	0.00095233	0.000800966	0.0108925	12	Spectrin beta chain, non-erythrocytic 2 OS=Rattus norvegicus OX=10116 GN=Sptbn2 PE=1 SV=2
Hippocampus	P12346	Tf	1.4745e-05	2.71195e-05	2.17497e-05	7.83081e-06	4.36879e-05	3.85512e-05	2.2562e-05	2.537e-05	3.64886e-05	9.72487e-06	4.60205e-05	7.81694e-06	0.000301667	12	Serotransferrin OS=Rattus norvegicus OX=10116 GN=Tf PE=1 SV=3
Hippocampus	P05370	G6pdx	1.03561e-05	1.47247e-05	2.68951e-05	1.8068e-05	2.7853e-05	1.48273e-05	1.95187e-05	2.60194e-05	1.0611e-05	2.36667e-05	2.05802e-05	2.53859e-05	0.000238506	12	Glucose-6-phosphate 1-dehydrogenase OS=Rattus norvegicus OX=10116 GN=G6pdx PE=1 SV=3
Hippocampus	O88600	Hspa4	0.000587885	0.000482688	0.000482888	0.000502189	0.000570887	0.000506221	0.000386214	0.000408745	0.000478631	0.000580166	0.000410641	0.000525255	0.00592241	12	Heat shock 70 kDa protein 4 OS=Rattus norvegicus OX=10116 GN=Hspa4 PE=1 SV=1
Hippocampus	Q5XIM9	Cct2	0.000179693	0.000261848	0.000169081	0.000288674	0.000324952	0.000165872	0.000232392	0.000208181	0.000851228	0.000193766	0.000280069	0.000251812	0.00340757	12	T-complex protein 1 subunit beta OS=Rattus norvegicus OX=10116 GN=Cct2 PE=1 SV=3
Hippocampus	Q63092	Camkv	0.000397755	0.000374127	0.000353889	0.000446244	0.000371769	0.000344082	0.000411841	0.000286143	0.000255158	0.000262582	0.000236707	0.000391483	0.00413178	12	CaM kinase-like vesicle-associated protein OS=Rattus norvegicus OX=10116 GN=Camkv PE=1 SV=1
Hippocampus	P84092	Ap2m1	0.000536776	0.000594253	0.000289343	0.000290059	0.000493983	0.000295924	0.00062337	0.000372972	0.000439375	0.000458326	0.000378361	0.00056098	0.00533372	12	AP-2 complex subunit mu OS=Rattus norvegicus OX=10116 GN=Ap2m1 PE=1 SV=1
Hippocampus	P70566	Tmod2	4.15937e-05	5.82059e-05	4.1743e-05	3.00845e-05	0.000158776	6.88629e-05	4.4032e-05	5.13357e-05	3.8349e-05	0.000125506	3.18745e-05	7.17014e-05	0.000762064	12	Tropomodulin-2 OS=Rattus norvegicus OX=10116 GN=Tmod2 PE=1 SV=1
Hippocampus	P06686	Atp1a2	0.000261442	0.000241312	4.58947e-05	4.93088e-05	0.000226828	7.24911e-05	0.000415174	0.000437954	0.000246874	0.000359763	0.00037896	0.000181894	0.0029179	12	Sodium/potassium-transporting ATPase subunit alpha-2 OS=Rattus norvegicus OX=10116 GN=Atp1a2 PE=1 SV=1
Hippocampus	P18484	Ap2a2	0.000940968	0.0012164	0.00079264	0.000904078	0.000812984	0.000671431	0.00132386	0.00116241	0.00110206	0.000726857	0.000891874	0.00109605	0.0116416	12	AP-2 complex subunit alpha-2 OS=Rattus norvegicus OX=10116 GN=Ap2a2 PE=1 SV=3
Hippocampus	Q5FVM4	Nono	2.73374e-05	5.34276e-05	1.49353e-05	2.0627e-05	4.50522e-05	3.03137e-05	5.926e-05	2.63807e-05	3.98964e-05	1.45003e-05	1.19148e-05	3.89185e-05	0.000382564	12	Non-POU domain-containing octamer-binding protein OS=Rattus norvegicus OX=10116 GN=Nono PE=1 SV=3
Hippocampus	P70645	Blmh	2.46884e-05	1.77577e-05	3.72952e-05	2.33909e-05	2.10827e-05	2.08755e-05	9.19911e-06	2.11017e-05	2.86305e-05	6.43683e-05	1.5062e-05	3.50294e-05	0.000318481	12	Bleomycin hydrolase OS=Rattus norvegicus OX=10116 GN=Blmh PE=1 SV=1
Hippocampus	Q5U318	Pea15	0.000233546	0.000238952	0.000258839	0.000318628	0.000144001	0.000223359	0.000259386	0.000281546	0.000254891	0.000209219	0.000237093	0.000277307	0.00293677	12	Astrocytic phosphoprotein PEA-15 OS=Rattus norvegicus OX=10116 GN=Pea15 PE=1 SV=1
Hippocampus	P68255	Ywhaq	0.000533253	0.000604056	0.000619147	0.000677744	0.000529878	0.000530967	0.000591292	0.00060135	0.000507388	0.000483471	0.000512432	0.00052225	0.00671323	12	14-3-3 protein theta OS=Rattus norvegicus OX=10116 GN=Ywhaq PE=1 SV=1
Hippocampus	P09216	Prkce	0.000160622	0.000213473	7.70396e-05	0.000141093	9.91611e-05	0.000137919	0.000155718	0.00012504	7.95772e-05	0.000144412	0.000119293	0.000130969	0.00158432	12	Protein kinase C epsilon type OS=Rattus norvegicus OX=10116 GN=Prkce PE=1 SV=1
Hippocampus	F1LMZ8	Psmd11	3.4965e-05	3.40795e-05	4.51609e-05	4.99435e-05	3.11372e-05	3.21929e-05	2.66902e-05	2.14895e-05	3.36116e-05	3.89594e-05	2.3528e-05	4.53468e-05	0.000417105	12	26S proteasome non-ATPase regulatory subunit 11 OS=Rattus norvegicus OX=10116 GN=Psmd11 PE=1 SV=2
Hippocampus	Q91ZN1	Coro1a	0.000266686	0.000276839	0.000187131	0.000192941	0.000303583	0.000203094	0.000227039	0.000160311	0.000155488	0.000301464	9.73472e-05	0.000193206	0.00256513	12	Coronin-1A OS=Rattus norvegicus OX=10116 GN=Coro1a PE=1 SV=3
Hippocampus	Q5HZV9	Ppp1r7	0.00025792	0.000222214	0.000193808	0.000173472	0.000256248	0.000233532	0.000115761	0.000121231	8.0591e-05	0.000121318	0.000162902	0.000170821	0.00210982	12	Protein phosphatase 1 regulatory subunit 7 OS=Rattus norvegicus OX=10116 GN=Ppp1r7 PE=1 SV=1
Hippocampus	O08838	Amph	0.00047096	0.000436703	0.000340702	0.000474474	0.000310775	0.000363602	0.0003708	0.000319911	0.000324563	0.00041054	0.000328579	0.000485089	0.0046367	12	Amphiphysin OS=Rattus norvegicus OX=10116 GN=Amph PE=1 SV=1
Hippocampus	Q9QZM5	Abi1	0.000104454	7.36177e-05	4.5298e-05	2.63745e-05	8.92718e-05	5.82223e-05	3.8656e-05	7.30965e-05	3.19994e-05	4.58697e-05	1.6908e-05	6.7545e-05	0.000671313	12	Abl interactor 1 OS=Rattus norvegicus OX=10116 GN=Abi1 PE=1 SV=3
Hippocampus	P13437	Acaa2	2.09239e-06	7.54508e-07	6.35751e-06	1.63759e-06	8.96214e-06	3.21071e-06	4.20588e-06			6.39045e-06	4.42198e-06		3.80332e-05	9	3-ketoacyl-CoA thiolase, mitochondrial OS=Rattus norvegicus OX=10116 GN=Acaa2 PE=1 SV=1
Hippocampus	O35244	Prdx6	0.00066269	0.000589396	0.000654772	0.000933311	0.000678508	0.000538469	0.000553835	0.000551056	0.000651162	0.000711684	0.000522266	0.000798217	0.00784537	12	Peroxiredoxin-6 OS=Rattus norvegicus OX=10116 GN=Prdx6 PE=1 SV=3
Hippocampus	P31977	Ezr	1.97299e-05	5.65938e-06	2.71884e-05	1.89012e-05	2.5804e-06	9.79086e-06	1.90087e-05	3.47517e-05	4.59681e-05	3.22215e-05	1.98963e-05	2.08435e-05	0.00025654	12	Ezrin OS=Rattus norvegicus OX=10116 GN=Ezr PE=1 SV=3
Hippocampus	F1LP90	Mink1	4.23682e-06	7.01792e-07	2.25191e-06			4.02973e-06	7.0154e-06	5.88772e-06	5.4101e-06	2.69671e-06	2.4205e-06	6.72881e-06	4.13795e-05	10	Misshapen-like kinase 1 OS=Rattus norvegicus OX=10116 GN=Mink1 PE=1 SV=2
Hippocampus	O35142	Copb2	3.58478e-06	6.13795e-06	8.27995e-06	1.31879e-05	3.88621e-06	1.51534e-06	1.04309e-05	9.01701e-06	1.53213e-05		4.17068e-06	6.11802e-06	8.16501e-05	11	Coatomer subunit beta' OS=Rattus norvegicus OX=10116 GN=Copb2 PE=1 SV=3
Hippocampus	Q08602	Rabggta	1.61446e-05	3.25048e-05	2.68713e-05	3.87798e-05	2.73852e-05	4.46862e-05	1.22556e-05	1.96736e-05	2.16003e-05	1.76388e-05	9.08004e-06	2.41175e-05	0.000290738	12	Geranylgeranyl transferase type-2 subunit alpha OS=Rattus norvegicus OX=10116 GN=Rabggta PE=1 SV=1
Hippocampus	B0BN85	Sugt1	5.4474e-06	5.24123e-06	4.94714e-06	4.34172e-06	7.3311e-06	6.25758e-06	1.78975e-06	3.4358e-06	4.1163e-06	4.92729e-06	1.66061e-06	6.65749e-06	5.61534e-05	12	Protein SGT1 homolog OS=Rattus norvegicus OX=10116 GN=Sugt1 PE=2 SV=1
Hippocampus	P61107	Rab14	0.000112861	0.000135948	8.39631e-05	0.000133563	0.000145253	0.00011823	0.000193435	0.000151551	0.000170477	0.000202988	0.000155785	0.000158349	0.0017624	12	Ras-related protein Rab-14 OS=Rattus norvegicus OX=10116 GN=Rab14 PE=1 SV=3
Hippocampus	P35281	Rab10	2.89195e-05	4.83627e-05	2.60584e-05	3.54708e-05	2.2916e-05		4.33706e-05	2.7936e-05	4.26395e-05	8.90676e-06	2.12386e-05	2.97392e-05	0.000335558	11	Ras-related protein Rab-10 OS=Rattus norvegicus OX=10116 GN=Rab10 PE=1 SV=1
Hippocampus	Q62826	Hnrnpm			1.26334e-05		6.58112e-06	1.00841e-05	2.45853e-05	1.67503e-05	1.83016e-05	1.05326e-05	9.39543e-06	1.65861e-05	0.00012545	9	Heterogeneous nuclear ribonucleoprotein M OS=Rattus norvegicus OX=10116 GN=Hnrnpm PE=1 SV=4
Hippocampus	Q9WVC0	Septin7	0.000249027	0.000248489	0.000151399	0.00016628	0.000188235	0.000182614	0.000334849	0.000228721	0.000252663	0.000177288	0.000255006	0.000220269	0.00265484	12	Septin-7 OS=Rattus norvegicus OX=10116 GN=Septin7 PE=1 SV=1
Hippocampus	Q62868	Rock2	3.13934e-05	3.88516e-05	4.83394e-05	4.18704e-05	2.94909e-05	2.8368e-05	5.88579e-05	2.94637e-05	3.04305e-05	2.23636e-05	9.57893e-06	2.53002e-05	0.000394309	12	Rho-associated protein kinase 2 OS=Rattus norvegicus OX=10116 GN=Rock2 PE=1 SV=2
Hippocampus	P19511	Atp5pb	4.74543e-05	5.17414e-05	6.33667e-07	7.45935e-06	4.00273e-05	2.23934e-06	6.46876e-05	0.000111618	0.000144062	5.34528e-05	9.86539e-05	3.51778e-05	0.000657207	12	ATP synthase F(0) complex subunit B1, mitochondrial OS=Rattus norvegicus OX=10116 GN=Atp5pb PE=1 SV=1
Hippocampus	P21670	Psma4	5.15457e-05	0.00015567	7.30333e-05	6.6382e-05	0.000145184	5.16264e-05	5.57339e-05	9.66478e-05	5.36989e-05	0.000108766	0.000102325	0.00012011	0.00108072	12	Proteasome subunit alpha type-4 OS=Rattus norvegicus OX=10116 GN=Psma4 PE=1 SV=1
Hippocampus	P04041	Gpx1	1.49885e-05	1.146e-05	2.11848e-05	2.19598e-05		2.05226e-05	3.61335e-05	1.99967e-05	1.88789e-05	2.38043e-05	1.93227e-05	1.6199e-05	0.000224451	11	Glutathione peroxidase 1 OS=Rattus norvegicus OX=10116 GN=Gpx1 PE=1 SV=4
Hippocampus	P27952	Rps2	6.48372e-05	0.000112418	6.21246e-05	9.14175e-05	0.000130397	8.59287e-05	0.000141692	8.94181e-05	0.000110187	7.02461e-05	5.54948e-05	0.000130617	0.00114478	12	40S ribosomal protein S2 OS=Rattus norvegicus OX=10116 GN=Rps2 PE=1 SV=1
Hippocampus	B0BN93	Psmd13	3.81288e-05	3.68917e-05	2.83941e-05	4.00353e-05	3.48951e-05	2.28678e-05	3.06799e-05	2.66274e-05	3.08554e-05	1.00502e-05	7.06413e-05	4.84502e-05	0.000418517	12	26S proteasome non-ATPase regulatory subunit 13 OS=Rattus norvegicus OX=10116 GN=Psmd13 PE=1 SV=1
Hippocampus	Q9QVC8	Fkbp4	1.8446e-05	1.50841e-05	8.14159e-06	1.24023e-05	7.98474e-06	8.26861e-06	1.72517e-05	1.64628e-05	1.90609e-05	1.12755e-05	1.65364e-05	2.02313e-05	0.000171146	12	Peptidyl-prolyl cis-trans isomerase FKBP4 OS=Rattus norvegicus OX=10116 GN=Fkbp4 PE=1 SV=3
Hippocampus	Q68FX1	Mpi	7.44568e-06	1.12499e-05	8.7969e-06	5.39971e-06	1.03928e-05	8.44389e-06	6.32218e-06	3.34852e-06	1.14387e-05		4.23328e-06	1.27948e-05	8.98663e-05	11	Mannose-6-phosphate isomerase OS=Rattus norvegicus OX=10116 GN=Mpi PE=2 SV=1
Hippocampus	P63047	Sult4a1	2.61366e-05	4.03426e-05	2.0993e-05	2.41822e-05	1.05282e-05	1.26286e-05	8.06075e-06		1.51323e-05	1.00603e-05	5.23331e-06	1.96673e-05	0.000192965	11	Sulfotransferase 4A1 OS=Rattus norvegicus OX=10116 GN=Sult4a1 PE=1 SV=1
Hippocampus	P21571	Atp5pf	1.57217e-05	1.64663e-05			5.22136e-06	2.56974e-06	4.19138e-05	7.45993e-05	6.1137e-05	3.52513e-06	6.25094e-05	7.76178e-06	0.000291425	10	ATP synthase-coupling factor 6, mitochondrial OS=Rattus norvegicus OX=10116 GN=Atp5pf PE=1 SV=1
Hippocampus	Q07009	Capn2	4.36642e-05	5.50764e-05	5.83863e-05	6.54796e-05	5.81456e-05	4.22189e-05	6.33747e-05	6.64259e-05	6.7762e-05	5.15868e-05	4.95054e-05	7.78844e-05	0.00069951	12	Calpain-2 catalytic subunit OS=Rattus norvegicus OX=10116 GN=Capn2 PE=1 SV=3
Hippocampus	O88588	Pacs1	5.28948e-06	3.82094e-06	8.12085e-06	2.26443e-06		6.53748e-06	1.0786e-05	1.02471e-05	2.65178e-05	2.48268e-05	5.28257e-06	1.17493e-05	0.000115443	11	Phosphofurin acidic cluster sorting protein 1 OS=Rattus norvegicus OX=10116 GN=Pacs1 PE=1 SV=1
Hippocampus	P60123	Ruvbl1	3.7847e-06	3.69857e-06	2.26766e-06	2.74028e-06	3.75677e-06	2.7104e-06	6.50954e-06	5.91691e-06	1.11147e-05	7.61452e-06	3.22039e-06	4.65323e-06	5.79876e-05	12	RuvB-like 1 OS=Rattus norvegicus OX=10116 GN=Ruvbl1 PE=1 SV=1
Hippocampus	Q9EQX9	Ube2n	0.000382222	0.000426667	0.000285273	0.000362436	0.000264506	0.000130547	0.000261175	0.000299571	0.000273766	0.000414724	0.000201416	0.000291462	0.00359376	12	Ubiquitin-conjugating enzyme E2 N OS=Rattus norvegicus OX=10116 GN=Ube2n PE=1 SV=1
Hippocampus	Q05764	Add2	4.28973e-06	6.77759e-06	2.541e-06	1.58519e-06		4.12241e-06	2.43047e-06	1.26803e-06	3.78372e-06	4.43194e-06	4.77578e-06	5.30248e-06	4.13083e-05	11	Beta-adducin OS=Rattus norvegicus OX=10116 GN=Add2 PE=1 SV=4
Hippocampus	P62804	H4c2	0.000508628	0.000155394	2.40832e-05	7.07567e-05	0.0003679	0.000185783	0.000787559	0.000963909	0.000712143	0.00018621	0.00112211	0.000456945	0.00554143	12	Histone H4 OS=Rattus norvegicus OX=10116 GN=H4c2 PE=1 SV=2
Hippocampus	Q5I0D5	Lhpp	9.29626e-06	3.7857e-06	9.82751e-06	1.29848e-05	7.16203e-06	7.87889e-06	9.21085e-06	8.39291e-06	3.92199e-06	1.56405e-05	1.41521e-06	1.43238e-05	0.00010384	12	Phospholysine phosphohistidine inorganic pyrophosphate phosphatase OS=Rattus norvegicus OX=10116 GN=Lhpp PE=2 SV=1
Hippocampus	P56574	Idh2	0.000223203	0.000240281	0.00014884	0.000155372	0.00010224	0.000146251	9.00104e-05	6.50558e-05	8.14556e-05	0.000161859	0.000157632	0.00024204	0.00181424	12	Isocitrate dehydrogenase [NADP], mitochondrial OS=Rattus norvegicus OX=10116 GN=Idh2 PE=1 SV=2
Hippocampus	P20760	Igg-2a		9.78579e-06	1.71104e-05	1.3834e-05	0.000103373	0.000186177	1.15462e-05	1.82273e-05	1.89537e-05	0.000141658	1.13425e-05	8.76558e-06	0.000540773	11	Ig gamma-2A chain C region OS=Rattus norvegicus OX=10116 GN=Igg-2a PE=1 SV=1
Hippocampus	Q64591	Decr1	7.88212e-06	3.69893e-05	4.01455e-05	2.32953e-05	6.36701e-06	4.44504e-06	6.21959e-07		5.10469e-06	6.93197e-06	2.66021e-05	4.22924e-05	0.000200677	11	2,4-dienoyl-CoA reductase [(3E)-enoyl-CoA-producing], mitochondrial OS=Rattus norvegicus OX=10116 GN=Decr1 PE=1 SV=2
Hippocampus	O35814	Stip1	0.000389503	0.000396949	0.000400534	0.000398127	0.000237364	0.000251374	0.000311104	0.000302984	0.000378387	0.000394996	0.000316151	0.000437891	0.00421536	12	Stress-induced-phosphoprotein 1 OS=Rattus norvegicus OX=10116 GN=Stip1 PE=1 SV=1
Hippocampus	P40307	Psmb2	6.41945e-05	7.05117e-05	6.97118e-05	8.12699e-05	6.94603e-05	3.23161e-05	4.35679e-05	4.97909e-05	3.54618e-05	3.17965e-05	3.98267e-05	7.51784e-05	0.000663086	12	Proteasome subunit beta type-2 OS=Rattus norvegicus OX=10116 GN=Psmb2 PE=1 SV=1
Hippocampus	M0RC99	Rab5a	0.000118337	0.000127275	9.10863e-05	0.000106652	9.96337e-05	7.80986e-05	0.000160185	0.000126352	0.000151601	6.60458e-05	0.000110585	0.000125327	0.00136118	12	Ras-related protein Rab-5A OS=Rattus norvegicus OX=10116 GN=Rab5a PE=2 SV=1
Hippocampus	B0BNA7	Eif3i	1.83565e-06	1.54741e-05	1.83539e-05	1.48059e-05	8.15189e-06	2.57633e-05	4.32907e-05	2.1607e-06	2.19651e-06		3.87544e-05	1.34971e-05	0.000184284	11	Eukaryotic translation initiation factor 3 subunit I OS=Rattus norvegicus OX=10116 GN=Eif3i PE=2 SV=1
Hippocampus	Q5XIM7	Kars1	3.7567e-05	1.71977e-05	1.32894e-05	1.877e-05	1.09511e-05	9.28823e-06	1.81838e-05	9.76753e-06	1.93534e-05	5.63663e-06	6.23702e-06	2.0484e-05	0.000186726	12	Lysine--tRNA ligase OS=Rattus norvegicus OX=10116 GN=Kars1 PE=1 SV=1
Hippocampus	P41542	Uso1	4.28067e-05	3.70775e-05	4.68548e-05	6.4035e-05	5.11347e-05	4.27055e-05	2.85982e-05	2.05333e-05	5.2749e-05	3.8437e-05	5.02403e-05	4.46838e-05	0.000519856	12	General vesicular transport factor p115 OS=Rattus norvegicus OX=10116 GN=Uso1 PE=1 SV=1
Hippocampus	Q80W98	Sgtb			4.5411e-06	4.6275e-06	6.07307e-06	6.21329e-06			5.36499e-06		3.22121e-06	4.3515e-05	7.35562e-05	7	Small glutamine-rich tetratricopeptide repeat-containing protein beta OS=Rattus norvegicus OX=10116 GN=Sgtb PE=1 SV=1
Hippocampus	Q63396	Sub1	3.7203e-05	2.00313e-05	2.07512e-05	2.05142e-05	4.26597e-05	2.15477e-05	1.64563e-05	7.38683e-06		1.5729e-05	1.75442e-05	4.29652e-05	0.000262789	11	Activated RNA polymerase II transcriptional coactivator p15 OS=Rattus norvegicus OX=10116 GN=Sub1 PE=1 SV=3
Hippocampus	Q63598	Pls3	4.67986e-05	6.66559e-05	4.94114e-05	4.51377e-05	2.57169e-05	1.01995e-05	4.39222e-05	1.8763e-05	4.54569e-05	3.21171e-05	6.42211e-05	5.75141e-05	0.000505914	12	Plastin-3 OS=Rattus norvegicus OX=10116 GN=Pls3 PE=1 SV=2
Hippocampus	Q63270	Aco1	3.60548e-05	1.85522e-05	2.48006e-05	2.21245e-05	2.2593e-05	7.86973e-06	7.59195e-06	1.17531e-05	1.02748e-05	3.56793e-05	9.35719e-06	2.96821e-05	0.000236333	12	Cytoplasmic aconitate hydratase OS=Rattus norvegicus OX=10116 GN=Aco1 PE=1 SV=1
Hippocampus	Q9EQV6	Tpp1	4.88538e-06	2.55925e-06	3.45302e-06	5.05061e-06	2.74537e-06	3.06452e-06	7.61317e-06	1.34344e-05	4.59296e-06	3.85877e-06	8.08817e-06	9.99068e-06	6.93364e-05	12	Tripeptidyl-peptidase 1 OS=Rattus norvegicus OX=10116 GN=Tpp1 PE=1 SV=1
Hippocampus	P24049	Rpl17	1.79985e-05	7.96324e-05	6.29641e-06	2.01251e-05	4.35618e-05	3.67498e-05	5.57896e-05	2.80451e-05	2.64714e-05	2.52608e-05	1.89569e-05	8.40438e-05	0.000442931	12	60S ribosomal protein L17 OS=Rattus norvegicus OX=10116 GN=Rpl17 PE=2 SV=3
Hippocampus	Q5XHY5	Tars1	1.80885e-05	1.59329e-05	2.26231e-05	1.36368e-05	1.53168e-05	1.43704e-05	1.80819e-05	1.42744e-05	2.98174e-05	4.58265e-05	4.75497e-05	2.34309e-05	0.000278949	12	Threonine--tRNA ligase 1, cytoplasmic OS=Rattus norvegicus OX=10116 GN=Tars1 PE=1 SV=1
Hippocampus	Q9QXU8	Dync1li1	4.62316e-05	4.42134e-05	6.09071e-05	7.53369e-05	4.39676e-05	4.92922e-05	6.0145e-05	3.03783e-05	6.02409e-05	6.67195e-05	3.53781e-05	7.35484e-05	0.000646359	12	Cytoplasmic dynein 1 light intermediate chain 1 OS=Rattus norvegicus OX=10116 GN=Dync1li1 PE=1 SV=1
Hippocampus	Q64640	Adk	5.78063e-05	4.72533e-05	5.93404e-05	6.76832e-05	5.18488e-05	4.04191e-05	3.16304e-05	2.93444e-05	2.0952e-05	4.09185e-05	2.96494e-05	6.06466e-05	0.000537492	12	Adenosine kinase OS=Rattus norvegicus OX=10116 GN=Adk PE=1 SV=3
Hippocampus	P04897	Gnai2	1.96759e-05	1.51735e-05	3.81232e-06	4.66007e-06	1.93472e-05	9.85756e-06	5.77289e-05	4.40707e-05	3.7297e-05	2.48107e-05	4.57156e-05	1.16549e-05	0.000293805	12	Guanine nucleotide-binding protein G(i) subunit alpha-2 OS=Rattus norvegicus OX=10116 GN=Gnai2 PE=1 SV=3
Hippocampus	P41123	Rpl13	7.27516e-05	0.000105926	8.30283e-05	0.000117614	0.000110211	8.23718e-05	0.000110458	6.92808e-05	0.00011415	0.000104954	7.45787e-05	0.000113497	0.00115882	12	60S ribosomal protein L13 OS=Rattus norvegicus OX=10116 GN=Rpl13 PE=1 SV=2
Hippocampus	Q71UF4	Rbbp7	3.74154e-06	6.62753e-06	7.49514e-06	6.30023e-06	2.03964e-06	5.97276e-06	6.86539e-06	1.3062e-05	3.55304e-06	8.06071e-06	3.58616e-06	6.22984e-06	7.3534e-05	12	Histone-binding protein RBBP7 OS=Rattus norvegicus OX=10116 GN=Rbbp7 PE=2 SV=1
Hippocampus	P54921	Napa	0.000140085	0.000264315	8.05836e-05	7.70163e-05	0.000260263	0.000187547	0.00020006	0.000131667	8.31817e-05	0.000187234	0.000119079	0.000107454	0.00183849	12	Alpha-soluble NSF attachment protein OS=Rattus norvegicus OX=10116 GN=Napa PE=1 SV=2
Hippocampus	P16446	Pitpna	6.42317e-05	3.38821e-05	5.1648e-05	5.78393e-05	8.43479e-05	8.42219e-05	5.39276e-05	5.81829e-05	7.97268e-05	7.29791e-05	4.60415e-05	6.54503e-05	0.000752479	12	Phosphatidylinositol transfer protein alpha isoform OS=Rattus norvegicus OX=10116 GN=Pitpna PE=1 SV=2
Hippocampus	Q5I0P2	Gcsh	1.49608e-06	5.0929e-06	7.12267e-06	1.40898e-05		9.70129e-06	5.96768e-07	1.48898e-05	7.43176e-06	6.37136e-06	1.38191e-05	2.60347e-06	8.3215e-05	11	Glycine cleavage system H protein, mitochondrial OS=Rattus norvegicus OX=10116 GN=Gcsh PE=2 SV=1
Hippocampus	P24090	Ahsg			1.39961e-05	9.99561e-07	7.4727e-06	1.25906e-05		1.17952e-05	2.89587e-06		6.45808e-06	1.0486e-06	5.72568e-05	8	Alpha-2-HS-glycoprotein OS=Rattus norvegicus OX=10116 GN=Ahsg PE=1 SV=2
Hippocampus	P0C1X8	Aak1	0.000103948	0.000233402	0.000176266	0.000177278	0.000142553	0.00016272	0.000173696	0.000149004	0.000138348	0.000166208	0.000141308	0.000148	0.00191273	12	AP2-associated protein kinase 1 OS=Rattus norvegicus OX=10116 GN=Aak1 PE=1 SV=1
Hippocampus	Q5FVI4	Cend1		2.64765e-06	1.11879e-06	1.73345e-06		3.29911e-06	6.09848e-06	1.79245e-05	1.06795e-05	8.48453e-06	9.54226e-06	3.0824e-06	6.46107e-05	10	Cell cycle exit and neuronal differentiation protein 1 OS=Rattus norvegicus OX=10116 GN=Cend1 PE=1 SV=1
Hippocampus	O70593	Sgta	1.47492e-05	4.15338e-05	5.075e-05	4.59526e-05	4.86599e-05	3.58379e-05	4.13263e-05	3.32638e-05	6.741e-05	2.46998e-05	2.6398e-05	6.76162e-05	0.000498197	12	Small glutamine-rich tetratricopeptide repeat-containing protein alpha OS=Rattus norvegicus OX=10116 GN=Sgta PE=1 SV=1
Hippocampus	O70196	Prep	3.74692e-05	1.53702e-05	7.79703e-06	8.74148e-06	2.17329e-05	5.46986e-06	6.96518e-06	9.60813e-06	9.98931e-06	5.24721e-06	1.28552e-05	1.54298e-05	0.000156676	12	Prolyl endopeptidase OS=Rattus norvegicus OX=10116 GN=Prep PE=1 SV=1
Hippocampus	P34067	Psmb4	1.58175e-05	2.02057e-05	1.28704e-05	1.68115e-05	2.93443e-05	1.77668e-05	1.36019e-05	1.66203e-05	1.68648e-05	7.37648e-06	1.2724e-05	1.91562e-05	0.00019916	12	Proteasome subunit beta type-4 OS=Rattus norvegicus OX=10116 GN=Psmb4 PE=1 SV=2
Hippocampus	P62744	Ap2s1	0.000107059	0.000204594	4.50591e-05	8.73343e-05	0.000121783	5.47454e-05	0.000112806	0.000131272	0.000186039	5.13179e-05	0.000122454	0.000151067	0.00137553	12	AP-2 complex subunit sigma OS=Rattus norvegicus OX=10116 GN=Ap2s1 PE=1 SV=1
Hippocampus	P49803	Rgs7	2.65681e-05	2.49069e-05	1.15588e-05	1.24672e-05	1.22279e-05	2.50365e-05	7.0754e-05	4.788e-05	8.78342e-05	3.69394e-05	3.81126e-05	2.51789e-05	0.000419464	12	Regulator of G-protein signaling 7 OS=Rattus norvegicus OX=10116 GN=Rgs7 PE=1 SV=2
Hippocampus	O89049	Txnrd1	3.43809e-05	2.62569e-05	2.88163e-05	3.2549e-05	1.57355e-05	1.53717e-05	2.28218e-05	2.06197e-05	2.65937e-05	1.9582e-05	1.67598e-05	2.92859e-05	0.000288773	12	Thioredoxin reductase 1, cytoplasmic OS=Rattus norvegicus OX=10116 GN=Txnrd1 PE=1 SV=5
Hippocampus	D3ZDK7	Pgp	4.87857e-06	1.21916e-05	5.72147e-06	7.85681e-06	4.09031e-06	3.6038e-06			5.45671e-06	4.9449e-06	2.4399e-06	4.94674e-06	5.61308e-05	10	Glycerol-3-phosphate phosphatase OS=Rattus norvegicus OX=10116 GN=Pgp PE=1 SV=1
Hippocampus	B2GUZ5	Capza1	7.92054e-06	1.25447e-05	1.93474e-06	4.98279e-06	1.3853e-05	1.31945e-05	1.65016e-05	1.71441e-05	2.19015e-05	1.05001e-05	1.22029e-05	1.11763e-05	0.000143857	12	F-actin-capping protein subunit alpha-1 OS=Rattus norvegicus OX=10116 GN=Capza1 PE=1 SV=1
Hippocampus	P12001	Rpl18	4.08083e-05	0.000157637	8.35319e-05	0.000244782	5.88213e-05	3.2943e-05	8.0702e-05	0.000152109	0.000102257	5.2095e-05	0.000139321	7.08435e-05	0.00121585	12	60S ribosomal protein L18 OS=Rattus norvegicus OX=10116 GN=Rpl18 PE=1 SV=2
Hippocampus	Q5EB77	Rab18	1.95682e-05	2.71401e-05	8.64887e-06	6.49293e-06	2.12284e-05	1.00109e-05	2.72434e-05	1.54179e-05	2.40192e-05	1.97105e-05	1.47582e-05	2.21446e-05	0.000216383	12	Ras-related protein Rab-18 OS=Rattus norvegicus OX=10116 GN=Rab18 PE=2 SV=1
Hippocampus	P14669	Anxa3	3.01729e-06	3.3237e-06		4.33169e-06	5.3105e-06		4.92742e-05	3.07879e-05	3.38798e-05	6.48774e-07	7.27992e-06	6.56724e-06	0.000144421	10	Annexin A3 OS=Rattus norvegicus OX=10116 GN=Anxa3 PE=1 SV=4
Hippocampus	P55051	Fabp7	0.00020869	0.000158922	0.000157315	0.000163733	0.000187609	9.45578e-05	0.000200599	0.000170105	0.000344203	0.000118322	0.000222211	0.000256614	0.00228288	12	Fatty acid-binding protein, brain OS=Rattus norvegicus OX=10116 GN=Fabp7 PE=1 SV=2
Hippocampus	P60203	Plp1	0.000895872	0.00121472	0.000359373	0.000415451	0.00178675	0.000644961	0.00189771	0.00228713	0.00197047	0.00186899	0.00224409	0.00116231	0.0167478	12	Myelin proteolipid protein OS=Rattus norvegicus OX=10116 GN=Plp1 PE=1 SV=2
Hippocampus	Q62703	Rcn2	7.10513e-06	9.37491e-06	6.52053e-06	8.49733e-06	6.49228e-06	5.74701e-06	3.02303e-06	5.87817e-06	8.18967e-06	8.82687e-07	2.64118e-06	1.30457e-05	7.73976e-05	12	Reticulocalbin-2 OS=Rattus norvegicus OX=10116 GN=Rcn2 PE=1 SV=2
Hippocampus	Q7TMB7	Plppr4	3.48357e-06	4.56559e-06	2.27565e-06	2.40927e-06	1.00619e-05	6.48461e-06	1.314e-05	2.15989e-05	5.32302e-06	2.25076e-05	8.48566e-06	3.66541e-06	0.000104001	12	Phospholipid phosphatase-related protein type 4 OS=Rattus norvegicus OX=10116 GN=Plppr4 PE=1 SV=1
Hippocampus	B0BNM1	Naxe	2.4545e-05	3.07299e-05	1.9583e-05	2.53372e-05	2.58805e-05	5.73634e-05	1.80292e-05	2.02091e-05		1.95338e-05	2.02284e-05	2.7457e-05	0.000288897	11	NAD(P)H-hydrate epimerase OS=Rattus norvegicus OX=10116 GN=Naxe PE=2 SV=1
Hippocampus	Q99PF5	Khsrp	4.73909e-05	6.32128e-05	4.09624e-05	3.68535e-05	4.42872e-05	4.0423e-05	5.89449e-05	2.37593e-05	3.07218e-05	3.90079e-05	3.87684e-05	7.16522e-05	0.000535984	12	Far upstream element-binding protein 2 OS=Rattus norvegicus OX=10116 GN=Khsrp PE=1 SV=1
Hippocampus	P40329	Rars1	2.43691e-05	3.75954e-05	2.18939e-05	3.05498e-05	2.41741e-05	3.63158e-05	1.02491e-05	1.88917e-05	4.20182e-05	1.34596e-05	2.32408e-05	4.05876e-05	0.000323345	12	Arginine--tRNA ligase, cytoplasmic OS=Rattus norvegicus OX=10116 GN=Rars1 PE=1 SV=2
Hippocampus	O35094	Timm44	3.75675e-06	5.30916e-06	3.4176e-06	2.50814e-06		1.4349e-06	8.90761e-06	9.07492e-06	4.29143e-06	1.87334e-06	8.72109e-06		4.92949e-05	10	Mitochondrial import inner membrane translocase subunit TIM44 OS=Rattus norvegicus OX=10116 GN=Timm44 PE=1 SV=1
Hippocampus	Q6AY41	Tmem30a	1.90827e-05	3.4538e-05	4.07303e-06	4.56704e-06	1.56382e-05		2.62577e-05	1.34683e-05	2.11872e-05		1.00557e-05	1.66499e-05	0.000165518	10	Cell cycle control protein 50A OS=Rattus norvegicus OX=10116 GN=Tmem30a PE=1 SV=1
Hippocampus	P09495	Tpm4	3.6774e-06	4.18702e-06	2.81327e-06	3.23819e-06	7.93991e-06	6.8408e-06	8.10209e-06	9.16794e-06	2.57456e-05	6.20237e-06	8.31109e-06	9.03297e-06	9.52586e-05	12	Tropomyosin alpha-4 chain OS=Rattus norvegicus OX=10116 GN=Tpm4 PE=1 SV=3
Hippocampus	D3ZFD0	Myo18a	3.21916e-06	3.54109e-06	5.15229e-06	7.18165e-06	1.09705e-05	3.63671e-06	3.62244e-05	9.62833e-06	1.07696e-05	8.52899e-06	1.61045e-06	1.52906e-05	0.000115754	12	Unconventional myosin-XVIIIa OS=Rattus norvegicus OX=10116 GN=Myo18a PE=1 SV=2
Hippocampus	P18266	Gsk3b	2.27823e-05	9.33175e-06	1.0238e-05	6.23184e-06	1.17867e-05	9.97042e-06	1.62153e-05	1.18949e-05	2.20607e-05	3.61105e-06	6.67671e-06	1.1777e-05	0.000142577	12	Glycogen synthase kinase-3 beta OS=Rattus norvegicus OX=10116 GN=Gsk3b PE=1 SV=1
Hippocampus	Q66HR2	Mapre1	2.42367e-05	1.98625e-05	2.83722e-05	3.48064e-05	2.2313e-05	3.26329e-05	3.74405e-05	4.1506e-05	4.54644e-05	1.83917e-05	2.63831e-05	2.3779e-05	0.000355188	12	Microtubule-associated protein RP/EB family member 1 OS=Rattus norvegicus OX=10116 GN=Mapre1 PE=1 SV=3
Hippocampus	Q99N27	Snx1	9.99877e-06	1.81863e-05	1.89253e-05	2.88343e-05	2.66788e-05	1.8201e-05	2.79011e-05	2.90506e-05	2.91709e-05	1.54463e-05	7.52006e-06	2.74924e-05	0.000257406	12	Sorting nexin-1 OS=Rattus norvegicus OX=10116 GN=Snx1 PE=1 SV=1
Hippocampus	P50904	Rasa1	2.12203e-06		3.31362e-06	4.15818e-06			3.55619e-06	5.56853e-06	7.51449e-06	1.53264e-06	8.41324e-06	1.82243e-06	3.80013e-05	9	Ras GTPase-activating protein 1 OS=Rattus norvegicus OX=10116 GN=Rasa1 PE=1 SV=1
Hippocampus	Q6AYR2	Ndrg3	1.46507e-05	3.56394e-05	1.72036e-05	1.7607e-05	1.40723e-05	3.696e-06	1.63443e-05	8.01188e-06	8.75742e-06	3.10718e-05	1.53804e-05	3.28447e-05	0.000215279	12	Protein NDRG3 OS=Rattus norvegicus OX=10116 GN=Ndrg3 PE=1 SV=1
Hippocampus	P70580	Pgrmc1	2.8393e-05	1.63899e-05	6.36186e-06	9.01614e-06	3.66235e-05	4.19533e-06	4.64521e-05	2.87368e-05	5.88499e-05	3.89846e-06	1.26483e-05	1.54315e-05	0.000266997	12	Membrane-associated progesterone receptor component 1 OS=Rattus norvegicus OX=10116 GN=Pgrmc1 PE=1 SV=3
Hippocampus	Q62688	Plcl1	3.65207e-06	6.64837e-07	3.26418e-06	1.29482e-06	7.37767e-06	8.5814e-06		8.49051e-06	4.65453e-06		1.40675e-05	9.30096e-06	6.13485e-05	10	Inactive phospholipase C-like protein 1 OS=Rattus norvegicus OX=10116 GN=Plcl1 PE=1 SV=1
Hippocampus	Q5U2N3	Pitpnm1	1.22791e-06				1.03365e-06	4.33635e-07	2.48054e-06	2.81866e-06	1.77242e-06		5.08311e-06		1.48499e-05	7	Membrane-associated phosphatidylinositol transfer protein 1 OS=Rattus norvegicus OX=10116 GN=Pitpnm1 PE=1 SV=1
Hippocampus	P29147	Bdh1	1.90209e-05	2.7074e-05	1.70913e-05	8.1809e-06	1.53476e-05	8.312e-06	5.15936e-05	6.92539e-05	3.83364e-05	1.33612e-05	1.67297e-05	3.64285e-05	0.00032073	12	D-beta-hydroxybutyrate dehydrogenase, mitochondrial OS=Rattus norvegicus OX=10116 GN=Bdh1 PE=1 SV=2
Hippocampus	P61227	Rap2b	2.11383e-05	4.70881e-05	1.08048e-05	1.6448e-05	3.07434e-05	1.48559e-05	8.04298e-05	4.91589e-05	3.81569e-05	2.97549e-05	3.86182e-05	1.82475e-05	0.000395445	12	Ras-related protein Rap-2b OS=Rattus norvegicus OX=10116 GN=Rap2b PE=2 SV=1
Hippocampus	P62914	Rpl11	2.82582e-05	5.17882e-05	3.78758e-05	4.15062e-05	4.4637e-05	4.62002e-05	5.41165e-05	3.91858e-05	5.22067e-05	2.01328e-05	2.74021e-05	4.60985e-05	0.000489408	12	60S ribosomal protein L11 OS=Rattus norvegicus OX=10116 GN=Rpl11 PE=1 SV=2
Hippocampus	G3V9T7	Get3	2.00301e-05	2.79545e-05	1.57838e-05	1.7649e-05	2.2697e-05	1.95783e-05	3.53782e-05	1.48738e-05	3.49582e-05	1.53195e-05	7.6442e-06	2.22255e-05	0.000254092	12	ATPase Get3 OS=Rattus norvegicus OX=10116 GN=Get3 PE=1 SV=1
Hippocampus	P62246	Rps15a	0.000102762	0.000163855	2.73399e-05	8.66742e-05	0.000185772	3.82508e-05	0.000175132	9.44273e-05	0.000112666	4.94414e-05	6.11216e-05	0.000134402	0.00123184	12	40S ribosomal protein S15a OS=Rattus norvegicus OX=10116 GN=Rps15a PE=1 SV=2
Hippocampus	P00406	Mtco2	5.43222e-05	1.09158e-05			8.76768e-06		5.46274e-05	9.86501e-05	9.82847e-05	3.34829e-05	8.03418e-05	1.30244e-05	0.000452417	9	Cytochrome c oxidase subunit 2 OS=Rattus norvegicus OX=10116 GN=Mtco2 PE=1 SV=3
Hippocampus	O08816	Wasl	5.8805e-06	7.20187e-06	1.19095e-05	2.04291e-06	1.60834e-05	1.77194e-05	4.36908e-06	5.66644e-06	9.45548e-06	8.99614e-06	1.20041e-06	1.06224e-05	0.000101148	12	Neural Wiskott-Aldrich syndrome protein OS=Rattus norvegicus OX=10116 GN=Wasl PE=1 SV=2
Hippocampus	Q9EST6	Anp32b			3.53561e-07	1.41615e-05		5.3379e-06		2.73741e-06	1.00652e-05		4.02809e-06	1.52007e-05	5.18844e-05	7	Acidic leucine-rich nuclear phosphoprotein 32 family member B OS=Rattus norvegicus OX=10116 GN=Anp32b PE=1 SV=1
Hippocampus	P17078	Rpl35	2.20456e-05	3.38947e-05	2.97015e-05	2.76073e-05	4.9019e-05	1.6788e-05	4.9889e-05	3.55407e-05	4.60007e-05	2.37214e-05	1.30892e-05	3.44304e-05	0.000381727	12	60S ribosomal protein L35 OS=Rattus norvegicus OX=10116 GN=Rpl35 PE=1 SV=3
Hippocampus	Q5HZY2	Sar1b		7.22566e-06	8.71236e-06		1.17793e-05		3.43688e-06		5.05741e-06	4.40039e-05	3.57865e-06	9.0598e-06	9.28539e-05	8	GTP-binding protein SAR1b OS=Rattus norvegicus OX=10116 GN=Sar1b PE=2 SV=1
Hippocampus	Q4QRB4	Tubb3	0.00185577	0.00304238	0.00222735	0.00236038	0.00175201	0.00154192	0.00251909	0.00125897	0.00174039	0.00184659	0.0016605	0.00218008	0.0239854	12	Tubulin beta-3 chain OS=Rattus norvegicus OX=10116 GN=Tubb3 PE=1 SV=1
Hippocampus	Q8K4M9	Osbpl1a	2.24689e-05	2.33446e-05	1.99411e-05	2.58484e-05	9.72006e-06	8.51709e-06	8.42917e-06	5.33403e-06	1.49029e-05	1.73314e-05	8.52786e-06	2.82378e-05	0.000192603	12	Oxysterol-binding protein-related protein 1 OS=Rattus norvegicus OX=10116 GN=Osbpl1a PE=1 SV=1
Hippocampus	Q63537	Syn2	3.5691e-05	1.52725e-05	1.50681e-05	2.16237e-05	3.53007e-05	8.06766e-06	2.13697e-05	2.5369e-05	1.65294e-05	1.79401e-05	2.10733e-05	2.26328e-05	0.000255938	12	Synapsin-2 OS=Rattus norvegicus OX=10116 GN=Syn2 PE=1 SV=1
Hippocampus	Q62950	Crmp1	0.00109596	0.00125221	0.00111748	0.00116342	0.00106571	0.0010289	0.000882494	0.000783278	0.000963667	0.000942322	0.000956588	0.00117783	0.0124299	12	Dihydropyrimidinase-related protein 1 OS=Rattus norvegicus OX=10116 GN=Crmp1 PE=1 SV=1
Hippocampus	P04797	Gapdh	0.00524584	0.00547804	0.00405658	0.00514877	0.00556807	0.00507498	0.00404285	0.00382953	0.00451866	0.00647771	0.00417179	0.00525202	0.0588648	12	Glyceraldehyde-3-phosphate dehydrogenase OS=Rattus norvegicus OX=10116 GN=Gapdh PE=1 SV=3
Hippocampus	P17105	Itpka	0.000104259	9.01217e-05	9.93122e-05	8.56434e-05	0.000130728	0.000101012	0.000112064	6.93689e-05	2.3648e-05	0.000123978	6.58886e-05	4.76432e-05	0.00105367	12	Inositol-trisphosphate 3-kinase A OS=Rattus norvegicus OX=10116 GN=Itpka PE=1 SV=3
Hippocampus	P04631	S100b	0.000603673	0.000294418	0.000384699	0.000423315	0.00084312	0.000384617	0.000431544	0.000446026	0.000451028	0.000148489	0.000456004	0.000491061	0.00535799	12	Protein S100-B OS=Rattus norvegicus OX=10116 GN=S100b PE=1 SV=2
Hippocampus	P19945	Rplp0	6.44939e-05	7.76502e-05	5.19368e-05	6.12393e-05	0.000111401	9.4788e-05	0.000180454	0.000110104	9.2986e-05	3.84054e-05	8.89106e-05	0.000118875	0.00109124	12	60S acidic ribosomal protein P0 OS=Rattus norvegicus OX=10116 GN=Rplp0 PE=1 SV=2
Hippocampus	P18418	Calr	0.000309044	0.000351723	0.000254076	0.000299274	0.000290874	0.000241757	0.000271997	0.000223636	0.000356994	0.000206506	0.000198612	0.000370851	0.00337535	12	Calreticulin OS=Rattus norvegicus OX=10116 GN=Calr PE=1 SV=1
Hippocampus	Q9ESB5	Necab1	1.39558e-05	5.56952e-06	3.86899e-06	2.49178e-05	1.47522e-05		6.3293e-06	2.63902e-06	1.43657e-05	4.28016e-06	9.78259e-07	1.26424e-05	0.000104299	11	N-terminal EF-hand calcium-binding protein 1 OS=Rattus norvegicus OX=10116 GN=Necab1 PE=1 SV=1
Hippocampus	O09175	Rnpep	0.000113463	9.86177e-05	0.000117974	0.000116494	7.58285e-05	0.000148387	4.79482e-05	5.28793e-05	5.45986e-05	6.70847e-05	6.57945e-05	9.69027e-05	0.00105597	12	Aminopeptidase B OS=Rattus norvegicus OX=10116 GN=Rnpep PE=1 SV=2
Hippocampus	P59215	Gnao1	4.3027e-05	6.89776e-05	2.06174e-05	2.30765e-05	4.20657e-05	3.15312e-05	8.03139e-05	4.06345e-05	3.33689e-05	1.67815e-05	5.60438e-05	4.45811e-05	0.000501019	12	Guanine nucleotide-binding protein G(o) subunit alpha OS=Rattus norvegicus OX=10116 GN=Gnao1 PE=1 SV=2
Hippocampus	F1M4A4	Kif1a	6.39411e-06	7.48303e-06	7.37673e-06	8.46917e-06	2.0673e-05	4.75108e-06	4.22975e-06	6.49968e-06	1.02487e-05	1.9078e-05	4.40261e-06	9.24046e-06	0.000108846	12	Kinesin-like protein KIF1A OS=Rattus norvegicus OX=10116 GN=Kif1a PE=1 SV=3
Hippocampus	P0C5X8	Ttyh1	1.9659e-05	3.24358e-05	1.70138e-05	7.37335e-06	2.42615e-05	1.13215e-05	2.75995e-05	2.62546e-05	1.55221e-05	1.43344e-05	1.63602e-05	9.50744e-06	0.000221643	12	Protein tweety homolog 1 OS=Rattus norvegicus OX=10116 GN=Ttyh1 PE=1 SV=1
Hippocampus	P37805	Tagln3	0.000276101	0.000402555	0.000246238	0.000295744	0.0003393	0.000270489	0.000292272	0.000245911	0.00028359	0.000257628	0.000240559	0.000481768	0.00363216	12	Transgelin-3 OS=Rattus norvegicus OX=10116 GN=Tagln3 PE=1 SV=2
Hippocampus	P30835	Pfkl	0.000318524	0.000269204	0.00018726	0.000299956	0.000244486	0.000209415	0.000409982	0.0003308	0.000331133	0.000215332	0.000275883	0.000326354	0.00341833	12	ATP-dependent 6-phosphofructokinase, liver type OS=Rattus norvegicus OX=10116 GN=Pfkl PE=1 SV=3
Hippocampus	O88506	Stk39	3.52601e-05	4.0538e-05	3.17096e-05	1.61996e-05	8.48745e-05	1.08556e-05	4.03779e-05	5.52922e-05	3.86903e-05	3.82087e-05	2.01841e-05	5.7635e-05	0.000469826	12	STE20/SPS1-related proline-alanine-rich protein kinase OS=Rattus norvegicus OX=10116 GN=Stk39 PE=1 SV=2
Hippocampus	Q01986	Map2k1	0.000316838	0.000266699	0.000235384	0.000229701	0.000338388	0.000211359	0.000210922	0.000162854	0.000156989	0.000345262	0.000211444	0.000263657	0.0029495	12	Dual specificity mitogen-activated protein kinase kinase 1 OS=Rattus norvegicus OX=10116 GN=Map2k1 PE=1 SV=2
Hippocampus	Q5I0G4	Gars1	6.991e-05	3.87639e-05	3.16611e-05	4.99775e-05	4.20426e-05	4.15676e-05	1.34758e-05	1.22418e-05	2.03669e-05	4.44411e-05	3.40778e-05	3.70129e-05	0.000435539	12	Glycine--tRNA ligase OS=Rattus norvegicus OX=10116 GN=Gars1 PE=1 SV=2
Hippocampus	P09117	Aldoc	0.001496	0.00134324	0.00117886	0.00126829	0.00105782	0.00112509	0.00112131	0.00100531	0.00104034	0.00131397	0.00112523	0.00142401	0.0144995	12	Fructose-bisphosphate aldolase C OS=Rattus norvegicus OX=10116 GN=Aldoc PE=1 SV=3
Hippocampus	Q711G3	Iah1	8.90219e-06	1.19459e-05	1.30099e-05	1.69451e-05	1.21811e-05	1.58682e-05	7.45954e-06	7.77652e-06	4.23823e-06	1.09002e-05	8.88265e-06	1.14393e-05	0.000129549	12	Isoamyl acetate-hydrolyzing esterase 1 homolog OS=Rattus norvegicus OX=10116 GN=Iah1 PE=2 SV=2
Hippocampus	P11232	Txn	0.000209884	0.000218669	0.000306338	0.000286608	0.000245443	0.000222812	0.00026108	0.000277147	0.000302868	0.000293022	0.000244053	0.00030231	0.00317023	12	Thioredoxin OS=Rattus norvegicus OX=10116 GN=Txn PE=1 SV=2
Hippocampus	O88761	Psmd1	3.37887e-05	2.79717e-05	2.29441e-05	4.23631e-05	2.21438e-05	2.42074e-05	2.9408e-05	1.62717e-05	2.73962e-05	2.41134e-05	1.60149e-05	3.73599e-05	0.000323983	12	26S proteasome non-ATPase regulatory subunit 1 OS=Rattus norvegicus OX=10116 GN=Psmd1 PE=1 SV=1
Hippocampus	Q9ERH3	Wdr7		3.94485e-06	6.46646e-07	1.30733e-06	5.96742e-06	4.24432e-06	4.14873e-06	3.77984e-06	2.68792e-06	7.07408e-06	1.57544e-06		3.53766e-05	10	WD repeat-containing protein 7 OS=Rattus norvegicus OX=10116 GN=Wdr7 PE=1 SV=1
Hippocampus	Q99NA5	Idh3a	0.000752344	0.00087224	0.000698337	0.000672563	0.000774971	0.00063754	0.000635541	0.000684391	0.000417814	0.000896913	0.000710279	0.000785684	0.00853862	12	Isocitrate dehydrogenase [NAD] subunit alpha, mitochondrial OS=Rattus norvegicus OX=10116 GN=Idh3a PE=1 SV=1
Hippocampus	P42123	Ldhb	0.00239732	0.0027703	0.00263876	0.00298454	0.00154798	0.00171352	0.00197813	0.00158	0.00172788	0.00212947	0.00182804	0.00215279	0.0254487	12	L-lactate dehydrogenase B chain OS=Rattus norvegicus OX=10116 GN=Ldhb PE=1 SV=2
Hippocampus	Q66X93	Snd1	5.20871e-06	2.89293e-06	1.29213e-06	8.77996e-06	8.06742e-06	3.52494e-06	1.03562e-05	2.50405e-06	3.32416e-06	1.40819e-05	5.67845e-06	6.18953e-06	7.19004e-05	12	Staphylococcal nuclease domain-containing protein 1 OS=Rattus norvegicus OX=10116 GN=Snd1 PE=1 SV=1
Hippocampus	P85969	Napb	0.000187826	0.000276945	7.85992e-05	0.000137357	0.000277977	0.000219102	0.000253607	0.000203039	0.000173137	0.000198175	0.000141247	0.000179414	0.00232643	12	Beta-soluble NSF attachment protein OS=Rattus norvegicus OX=10116 GN=Napb PE=1 SV=1
Hippocampus	P62630	Eef1a1	0.000331831	0.000335785	0.000270202	0.000276712	0.000333138	0.000331936	0.000264405	0.000252821	0.000288248	0.000243795	0.000210134	0.000343576	0.00348258	12	Elongation factor 1-alpha 1 OS=Rattus norvegicus OX=10116 GN=Eef1a1 PE=2 SV=1
Hippocampus	Q05140-2	Snap91	5.65089e-06	3.7611e-06	5.83634e-06	7.25654e-06		7.76218e-06	9.82974e-06	6.99624e-06			8.87591e-06	4.99786e-06	6.09668e-05	9	Isoform 2 of Clathrin coat assembly protein AP180 OS=Rattus norvegicus OX=10116 GN=Snap91
Hippocampus	P15205	Map1b	0.000583709	0.000405967	0.000380374	0.000273339	0.000490277	0.000476202	0.000574343	0.000691505	0.000565011	0.00079349	0.000626043	0.000480893	0.00634115	12	Microtubule-associated protein 1B OS=Rattus norvegicus OX=10116 GN=Map1b PE=1 SV=3
Hippocampus	Q62785	Pdap1	9.98646e-06	8.58638e-06	9.68367e-06	3.65954e-06	1.16139e-05	1.21591e-05	5.68027e-06	1.15961e-05	8.19939e-06	1.68635e-05	5.04735e-06	1.05165e-05	0.000113592	12	28 kDa heat- and acid-stable phosphoprotein OS=Rattus norvegicus OX=10116 GN=Pdap1 PE=1 SV=1
Hippocampus	Q05175	Basp1	0.000178179	0.00022442	9.0008e-05	9.82961e-05	0.00023024	0.00016216	0.000377216	0.000415627	0.000332165	0.00019149	0.000259624	0.000197294	0.00275672	12	Brain acid soluble protein 1 OS=Rattus norvegicus OX=10116 GN=Basp1 PE=1 SV=2
Hippocampus	P45592	Cfl1	0.00140365	0.00152111	0.00169503	0.00149706	0.00142072	0.00147433	0.00122187	0.00145729	0.00130924	0.00129386	0.00119267	0.00123352	0.0167204	12	Cofilin-1 OS=Rattus norvegicus OX=10116 GN=Cfl1 PE=1 SV=3
Hippocampus	P06687	Atp1a3	0.000948883	0.000930791	0.000262111	0.000280309	0.000918836	0.000395482	0.00179612	0.00193028	0.00141725	0.00101038	0.00137346	0.000566217	0.0118301	12	Sodium/potassium-transporting ATPase subunit alpha-3 OS=Rattus norvegicus OX=10116 GN=Atp1a3 PE=1 SV=2
Hippocampus	P11348	Qdpr	0.000374778	0.000274045	0.000267357	0.000235582	0.000322907	0.000248874	0.000195208	0.000199757	0.000187137	0.000265302	0.000396591	0.000366274	0.00333381	12	Dihydropteridine reductase OS=Rattus norvegicus OX=10116 GN=Qdpr PE=1 SV=1
Hippocampus	P13383	Ncl	0.000102665	0.0010576	0.000122453	0.000129734	6.73731e-05	0.000123672	0.000129084	0.00010921	0.000115777	7.54415e-05	0.000115798	0.000141226	0.00229004	12	Nucleolin OS=Rattus norvegicus OX=10116 GN=Ncl PE=1 SV=3
Hippocampus	P84087	Cplx2	0.000231167	0.000210554	0.000177189	0.000220559	0.000236264	0.000281824	0.000176445	0.000150245	0.000110011	0.000240294	0.000147841	0.000117466	0.00229986	12	Complexin-2 OS=Rattus norvegicus OX=10116 GN=Cplx2 PE=1 SV=1
Hippocampus	P61751	Arf4	6.30458e-06	7.59675e-06	7.73679e-06	9.14134e-06	1.13095e-05		7.57343e-06	9.30761e-06	1.28814e-05		3.9286e-06	7.41224e-06	8.31923e-05	10	ADP-ribosylation factor 4 OS=Rattus norvegicus OX=10116 GN=Arf4 PE=2 SV=2
Hippocampus	P62815	Atp6v1b2	0.00100067	0.00117511	0.00107205	0.00108371	0.00122426	0.00129044	0.00136918	0.00140987	0.00117957	0.00142393	0.000976023	0.0010304	0.0142352	12	V-type proton ATPase subunit B, brain isoform OS=Rattus norvegicus OX=10116 GN=Atp6v1b2 PE=1 SV=1
Hippocampus	Q68FQ0	Cct5	0.000205249	0.000167343	0.000106067	0.000156189	0.000267475	9.55341e-05	0.000105377	8.90774e-05	0.000120835	0.000186143	0.000104533	0.000214392	0.00181821	12	T-complex protein 1 subunit epsilon OS=Rattus norvegicus OX=10116 GN=Cct5 PE=1 SV=1
Hippocampus	Q5XIG8	Strap	3.69271e-05	2.89139e-05	1.72471e-05	2.71955e-05	5.19946e-05	9.8163e-05	2.87709e-05	6.2875e-05	2.61526e-05	0.000121471	1.77383e-05	4.45303e-05	0.000561979	12	Serine-threonine kinase receptor-associated protein OS=Rattus norvegicus OX=10116 GN=Strap PE=1 SV=1
Hippocampus	P30009	Marcks	6.81823e-05	4.68378e-05	1.11679e-05	9.26563e-05	2.72149e-05	1.91772e-05	2.63153e-05	8.05444e-05	0.000138966	2.76509e-05	5.89201e-05	8.60339e-05	0.000683667	12	Myristoylated alanine-rich C-kinase substrate OS=Rattus norvegicus OX=10116 GN=Marcks PE=1 SV=2
Hippocampus	P17220	Psma2	3.33063e-05	3.95405e-05	5.577e-05	5.75956e-05	1.66444e-05	9.31785e-05	7.17823e-05	2.86403e-05	3.04797e-05	1.96052e-05	1.97697e-05	4.28056e-05	0.000509118	12	Proteasome subunit alpha type-2 OS=Rattus norvegicus OX=10116 GN=Psma2 PE=1 SV=3
Hippocampus	P15999	Atp5f1a	0.000770471	0.000660043	0.000236995	0.000255213	0.000679061	0.00027944	0.000918365	0.00177034	0.00121165	0.000763369	0.00116324	0.000586868	0.00929506	12	ATP synthase subunit alpha, mitochondrial OS=Rattus norvegicus OX=10116 GN=Atp5f1a PE=1 SV=2
Hippocampus	Q63941	Rab3b	1.45705e-05	2.21097e-05	1.78174e-05	3.04246e-05	1.12911e-05	1.44125e-05	1.9992e-05	1.80274e-05	2.35196e-05	1.39754e-05	7.07204e-06	2.25336e-05	0.000215746	12	Ras-related protein Rab-3B OS=Rattus norvegicus OX=10116 GN=Rab3b PE=1 SV=2
Hippocampus	P63331	Ppp2ca			2.1673e-05	3.17745e-05		2.35373e-05	2.95006e-05	2.57969e-05	2.00818e-05	4.52164e-05	2.75828e-05	2.82743e-05	0.000253438	9	Serine/threonine-protein phosphatase 2A catalytic subunit alpha isoform OS=Rattus norvegicus OX=10116 GN=Ppp2ca PE=1 SV=1
Hippocampus	P35465	Pak1	2.75745e-05	2.88861e-05	1.98314e-05	2.509e-05	2.35292e-05	2.77218e-05	8.122e-06	1.19238e-05	1.41338e-05	2.7929e-05	1.63697e-05	2.74743e-05	0.000258585	12	Serine/threonine-protein kinase PAK 1 OS=Rattus norvegicus OX=10116 GN=Pak1 PE=1 SV=3
Hippocampus	O35567	Atic	0.000109803	8.76019e-05	0.000119278	0.000112321	9.42912e-05	0.000117211	8.11224e-05	8.44085e-05	7.15192e-05	0.000121228	0.000134465	0.000101763	0.00123501	12	Bifunctional purine biosynthesis protein ATIC OS=Rattus norvegicus OX=10116 GN=Atic PE=1 SV=2
Hippocampus	P84100	Rpl19	1.557e-06	4.81352e-06	5.20364e-06	1.25115e-05	2.09878e-05	1.37917e-05	1.69131e-05	1.82601e-05	2.19846e-05		2.01771e-06	1.27919e-05	0.000130832	11	60S ribosomal protein L19 OS=Rattus norvegicus OX=10116 GN=Rpl19 PE=1 SV=1
Hippocampus	Q4KMA2	Rad23b	9.53973e-05	5.69129e-05	4.79726e-05	6.56436e-05	7.0528e-05	5.51912e-05	4.96804e-05	2.38852e-05	3.32128e-05	8.92197e-05	5.69928e-05	8.19289e-05	0.000726565	12	UV excision repair protein RAD23 homolog B OS=Rattus norvegicus OX=10116 GN=Rad23b PE=1 SV=1
Hippocampus	Q64537	Capns1	2.42369e-05	1.95908e-05	1.83909e-05	2.21787e-05	2.48658e-05	2.06387e-05	2.69939e-05	1.71336e-05	2.87336e-05	3.29939e-06	1.87674e-05	3.00872e-05	0.000254917	12	Calpain small subunit 1 OS=Rattus norvegicus OX=10116 GN=Capns1 PE=1 SV=3
Hippocampus	O35509	Rab11b	4.31963e-05	5.32359e-05	5.11877e-05	5.34843e-05	2.88647e-05	2.4281e-05	5.00338e-05	4.55603e-05	4.603e-05	3.20304e-05	5.2072e-05	4.34291e-05	0.000523406	12	Ras-related protein Rab-11B OS=Rattus norvegicus OX=10116 GN=Rab11b PE=1 SV=4
Hippocampus	Q01062	Pde2a	4.83026e-05	3.20482e-05	1.351e-05	4.8338e-05	2.67516e-05	1.38558e-05	9.79082e-05	4.67508e-05	0.000103435	9.32805e-05	8.12904e-05	5.99349e-05	0.000665406	12	cGMP-dependent 3',5'-cyclic phosphodiesterase OS=Rattus norvegicus OX=10116 GN=Pde2a PE=1 SV=2
Hippocampus	Q5XI72	Eif4h	3.29748e-05	1.66077e-05	6.08241e-05	0.000116507	3.03187e-05	1.94313e-05	1.70081e-05	1.85854e-05	2.21329e-05	1.75733e-05	7.15748e-05	3.73707e-05	0.000460909	12	Eukaryotic translation initiation factor 4H OS=Rattus norvegicus OX=10116 GN=Eif4h PE=1 SV=1
Hippocampus	P49432	Pdhb	0.000799652	0.000747551	0.000368809	0.000325753	0.000648895	0.000426073	0.000626788	0.000415784	0.000331843	0.000589731	0.000659478	0.00072268	0.00666304	12	Pyruvate dehydrogenase E1 component subunit beta, mitochondrial OS=Rattus norvegicus OX=10116 GN=Pdhb PE=1 SV=2
Hippocampus	P18421	Psmb1	5.35506e-05	3.65981e-05	5.11163e-05	3.96302e-05	5.91473e-05	4.71018e-05	2.91164e-05	2.23753e-05	3.79556e-05	6.09663e-05	3.73989e-05	4.77434e-05	0.0005227	12	Proteasome subunit beta type-1 OS=Rattus norvegicus OX=10116 GN=Psmb1 PE=1 SV=3
Hippocampus	Q5PPJ9	Sh3glb2	0.000145359	0.000177705	0.000148424	0.000152988	0.000158198	0.000133761	0.000125762	0.000119354	0.000112337	0.000116567	0.000134072	0.000158617	0.00168314	12	Endophilin-B2 OS=Rattus norvegicus OX=10116 GN=Sh3glb2 PE=1 SV=2
Hippocampus	Q4QQT4	Ppp2r1b	0.000147833	0.000141553	0.000196684	0.000202962	0.000108875	8.88129e-05	0.000152107	0.000142069	0.000132268	0.000146619	0.000102676	0.00013672	0.00169918	12	Serine/threonine-protein phosphatase 2A 65 kDa regulatory subunit A beta isoform OS=Rattus norvegicus OX=10116 GN=Ppp2r1b PE=2 SV=1
Hippocampus	P85968	Pgd	4.82498e-05	5.89823e-05	6.98079e-05	6.92771e-05	4.24395e-05	4.32925e-05	4.00872e-05	5.59713e-05	5.68651e-05	5.39085e-05	4.08568e-05	5.89637e-05	0.000638702	12	6-phosphogluconate dehydrogenase, decarboxylating OS=Rattus norvegicus OX=10116 GN=Pgd PE=1 SV=1
Hippocampus	Q99PD4	Arpc1a	0.000350258	0.000385937	0.000309192	0.000335263	0.000321966	0.000301692	0.000284458	0.000294925	0.00023354	0.000354682	0.00030578	0.000302269	0.00377996	12	Actin-related protein 2/3 complex subunit 1A OS=Rattus norvegicus OX=10116 GN=Arpc1a PE=2 SV=1
Hippocampus	Q62717	Cadps	0.000645402	0.000669142	0.000562263	0.000907685	0.000581133	0.000644773	0.000667725	0.000325798	0.000542407	0.000558993	0.000718051	0.000523657	0.00734703	12	Calcium-dependent secretion activator 1 OS=Rattus norvegicus OX=10116 GN=Cadps PE=1 SV=1
Hippocampus	P18088	Gad1	3.04221e-05	1.3399e-05	9.77598e-06	1.66513e-05	3.76528e-06	8.5917e-06	9.86969e-06	7.74146e-06	1.59017e-05	1.52214e-05	6.51121e-06	1.44107e-05	0.000152262	12	Glutamate decarboxylase 1 OS=Rattus norvegicus OX=10116 GN=Gad1 PE=1 SV=1
Hippocampus	P07340	Atp1b1	0.000391088	0.000450037	0.000144521	0.000183473	0.000446944	0.000127059	0.000818625	0.000964674	0.000712599	0.000549839	0.000645038	0.000347994	0.00578189	12	Sodium/potassium-transporting ATPase subunit beta-1 OS=Rattus norvegicus OX=10116 GN=Atp1b1 PE=1 SV=1
Hippocampus	Q9ES40	Arl6ip5	1.45656e-05	2.30268e-05	1.23721e-05	1.58895e-05	1.05698e-05	7.47021e-06	3.93049e-05	2.29076e-05	2.05982e-05	2.14415e-06	1.67217e-05	2.18013e-05	0.000207372	12	PRA1 family protein 3 OS=Rattus norvegicus OX=10116 GN=Arl6ip5 PE=1 SV=1
Hippocampus	P50878	Rpl4	6.62548e-05	0.000122186	7.64902e-05	9.48293e-05	0.000169857	0.000130734	0.000193037	0.000113158	0.000183004	8.55943e-05	9.57403e-05	0.000141085	0.00147197	12	60S ribosomal protein L4 OS=Rattus norvegicus OX=10116 GN=Rpl4 PE=1 SV=3
Hippocampus	P63055	Pcp4	5.27804e-05	5.31129e-05	4.94395e-05	7.24853e-05	4.63496e-05	1.20486e-05	1.92261e-05		4.84694e-05	5.47939e-05	1.77406e-05	4.2282e-05	0.000468728	11	Calmodulin regulator protein PCP4 OS=Rattus norvegicus OX=10116 GN=Pcp4 PE=1 SV=2
Hippocampus	Q64548-2	Rtn1	0.00014869	0.000217246	8.03311e-05	0.000166874		3.41679e-05	0.00023357	0.000132984	0.000175776	2.43933e-05	0.000150013	0.000209026	0.00157307	11	Isoform RTN1-S of Reticulon-1 OS=Rattus norvegicus OX=10116 GN=Rtn1
Hippocampus	Q05962	Slc25a4	0.000163239	7.80226e-05	1.35378e-05	7.40877e-06	8.83948e-05	1.03301e-05	0.000288479	0.000602349	0.000555888	4.45215e-05	0.000444526	8.48213e-05	0.00238152	12	ADP/ATP translocase 1 OS=Rattus norvegicus OX=10116 GN=Slc25a4 PE=1 SV=3
Hippocampus	P08461	Dlat	0.000544995	0.000754528	0.000487194	0.000483431	0.000485389	0.000488258	0.000834275	0.000589266	0.00048596	0.000559824	0.000730677	0.000708965	0.00715276	12	Dihydrolipoyllysine-residue acetyltransferase component of pyruvate dehydrogenase complex, mitochondrial OS=Rattus norvegicus OX=10116 GN=Dlat PE=1 SV=3
Hippocampus	P47875	Csrp1	9.91392e-05	9.66142e-05	0.000113099	0.000100216	0.000107953	8.95917e-05	8.70077e-05	6.30508e-05	6.57329e-05	0.000140137	0.000115404	0.000122846	0.00120079	12	Cysteine and glycine-rich protein 1 OS=Rattus norvegicus OX=10116 GN=Csrp1 PE=1 SV=2
Hippocampus	Q00715	Histone H2B type 1 OS=Rattus norvegicus OX=10116	0.000140056	5.62092e-05	2.51108e-05	5.98263e-05	0.000153427	7.3417e-05	0.000224302	0.000282882	0.000162386	0.000240516	0.000265454	0.000122725	0.00180631	12	Histone H2B type 1 OS=Rattus norvegicus OX=10116 PE=1 SV=2
Hippocampus	P62832	Rpl23	5.58166e-05	9.33818e-05	4.38997e-05	1.59296e-05	2.47954e-05	5.17745e-05	6.72633e-05	5.31276e-05	1.90845e-05	1.98729e-05	4.00983e-05	7.41368e-05	0.000559181	12	60S ribosomal protein L23 OS=Rattus norvegicus OX=10116 GN=Rpl23 PE=2 SV=1
Hippocampus	P97536	Cand1	0.00058336	0.000692838	0.000619949	0.000630335	0.000463161	0.000424892	0.000599601	0.000513067	0.000586767	0.000531363	0.000518361	0.000605947	0.00676964	12	Cullin-associated NEDD8-dissociated protein 1 OS=Rattus norvegicus OX=10116 GN=Cand1 PE=1 SV=1
Hippocampus	P07943	Akr1b1	0.000181346	0.000265324	0.000452016	0.000523877	0.000151887	0.000176429	0.000488739	0.000123696	0.000124679	0.000697984	0.000302078	0.00013733	0.00362539	12	Aldo-keto reductase family 1 member B1 OS=Rattus norvegicus OX=10116 GN=Akr1b1 PE=1 SV=3
Hippocampus	A2RUW1	Tollip	2.57749e-05	3.01284e-05	1.48931e-05	2.83502e-05	2.35992e-05	1.89119e-05	3.00439e-05	3.67744e-05	3.99233e-05	4.95552e-05	2.46575e-05	2.20266e-05	0.000344639	12	Toll-interacting protein OS=Rattus norvegicus OX=10116 GN=Tollip PE=1 SV=1
Hippocampus	Q6AZ50	Atg3	5.07509e-06	5.23895e-06	7.38424e-06	5.77567e-06		2.63826e-06	6.1748e-06	3.98889e-06	3.84833e-06	2.38015e-06	3.26351e-06	5.08204e-06	5.085e-05	11	Ubiquitin-like-conjugating enzyme ATG3 OS=Rattus norvegicus OX=10116 GN=Atg3 PE=2 SV=1
Hippocampus	Q6IMY8	Hnrnpu	0.000154932	0.000230858	0.000152243	0.000444529	0.000206864	0.000163548	0.000192898	0.000112613	0.000104773	0.000146223	8.1473e-05	0.00021893	0.00220988	12	Heterogeneous nuclear ribonucleoprotein U OS=Rattus norvegicus OX=10116 GN=Hnrnpu PE=1 SV=1
Hippocampus	O70351	Hsd17b10	5.63409e-05	6.05786e-05	4.65834e-05	3.72779e-05	8.3774e-05	3.85445e-05	5.73776e-05	3.37547e-05	2.66069e-05	5.0457e-05	3.10402e-05	6.69873e-05	0.000589323	12	3-hydroxyacyl-CoA dehydrogenase type-2 OS=Rattus norvegicus OX=10116 GN=Hsd17b10 PE=1 SV=3
Hippocampus	Q5RKI1	Eif4a2	0.000280823	0.000265773	0.000265323	0.000291591	0.000241112	0.000219053	0.000167317	0.000173453	0.000218731	0.00028809	0.000188714	0.000253945	0.00285393	12	Eukaryotic initiation factor 4A-II OS=Rattus norvegicus OX=10116 GN=Eif4a2 PE=1 SV=1
Hippocampus	Q794F9	Slc3a2	3.7084e-05	7.16495e-05	4.2589e-06	9.83867e-06	5.54133e-05	1.27648e-05	0.000249252	0.00011026	8.27688e-05	3.46789e-05	4.0836e-05	1.04487e-05	0.000719254	12	4F2 cell-surface antigen heavy chain OS=Rattus norvegicus OX=10116 GN=Slc3a2 PE=1 SV=1
Hippocampus	O35331	Pdxk	7.55821e-05	0.000106265	0.000114701	0.000126791	9.7129e-05	5.83179e-05	8.24224e-05	9.35086e-05	9.72396e-05	7.94456e-05	9.0123e-05	0.000192824	0.00121435	12	Pyridoxal kinase OS=Rattus norvegicus OX=10116 GN=Pdxk PE=1 SV=1
Hippocampus	Q99JD4	Clasp2	2.19217e-05	2.87845e-05	1.82217e-05	1.77351e-05	1.70578e-05	1.09039e-05	3.96754e-05	2.03521e-05	3.02315e-05	2.33199e-05	2.55189e-05	2.03463e-05	0.000274069	12	CLIP-associating protein 2 OS=Rattus norvegicus OX=10116 GN=Clasp2 PE=1 SV=1
Hippocampus	P13233	Cnp	0.00115703	0.0014549	0.00145967	0.000766826	0.00173416	0.0013624	0.00162684	0.00136384	0.000949476	0.00145966	0.00234093	0.00130459	0.0169803	12	2',3'-cyclic-nucleotide 3'-phosphodiesterase OS=Rattus norvegicus OX=10116 GN=Cnp PE=1 SV=2
Hippocampus	P09895	Rpl5	1.81486e-05	4.6279e-05	1.00229e-05	1.27553e-05	4.42266e-05	3.35288e-05	1.80767e-05	5.40051e-06	1.57264e-05	2.22262e-05	7.9284e-06	4.22455e-05	0.000276565	12	60S ribosomal protein L5 OS=Rattus norvegicus OX=10116 GN=Rpl5 PE=1 SV=3
Hippocampus	Q499N5	Acsf2	2.59387e-05	4.14389e-05	1.93753e-05	1.78894e-05	3.02449e-05	2.04323e-05	8.64513e-06	4.09592e-06	3.27124e-06	2.70199e-05	1.84734e-05	3.30146e-05	0.00024984	12	Medium-chain acyl-CoA ligase ACSF2, mitochondrial OS=Rattus norvegicus OX=10116 GN=Acsf2 PE=2 SV=1
Hippocampus	Q63198	Cntn1	0.000364742	0.000284172	0.000194973	0.000307957	0.000376311	0.000217194	0.000600301	0.000404565	0.000308464	0.000446535	0.000414005	0.000332967	0.00425219	12	Contactin-1 OS=Rattus norvegicus OX=10116 GN=Cntn1 PE=1 SV=2
Hippocampus	Q62812	Myh9	2.96947e-06	2.17039e-06			1.24573e-06	6.72173e-07	3.37702e-05	2.53242e-05	2.25044e-05	2.37518e-06	5.59463e-06	8.35825e-06	0.000104985	10	Myosin-9 OS=Rattus norvegicus OX=10116 GN=Myh9 PE=1 SV=3
Hippocampus	Q6RJR6	Rtn3	4.93664e-05	6.07837e-05	2.9684e-05	4.00477e-05	5.88132e-05	5.58936e-05	4.11792e-05	2.95816e-05	4.37407e-05	7.18524e-05	3.18884e-05	3.46409e-05	0.000547472	12	Reticulon-3 OS=Rattus norvegicus OX=10116 GN=Rtn3 PE=1 SV=1
Hippocampus	P61314	Rpl15	1.52547e-05	4.83937e-05	2.13038e-05	2.33673e-05	2.89233e-05	1.32363e-05	4.51435e-05	2.30085e-05	4.28113e-05	4.63885e-06	1.42982e-05	4.34397e-05	0.000323819	12	60S ribosomal protein L15 OS=Rattus norvegicus OX=10116 GN=Rpl15 PE=1 SV=2
Hippocampus	Q7TPB1	Cct4	0.000199614	0.000253146	0.000153233	0.00026617	0.000192784	0.000120691	0.00021811	0.000164052	0.000209715	0.000174523	0.000193514	0.000236055	0.00238161	12	T-complex protein 1 subunit delta OS=Rattus norvegicus OX=10116 GN=Cct4 PE=1 SV=3
Hippocampus	Q5RJQ4	Sirt2	0.000136155	0.000180078	9.32667e-05	7.35716e-05	0.000270852	0.000117297	0.000117141	0.000129518	9.7831e-05	0.000111977	0.000207077	0.000159191	0.00169396	12	NAD-dependent protein deacetylase sirtuin-2 OS=Rattus norvegicus OX=10116 GN=Sirt2 PE=1 SV=1
Hippocampus	P62898	Cycs	0.000693235	0.000845187	0.000645727	0.000696314	0.000342687	0.000363851	0.000958281	0.000879293	0.000824577	0.000729157	0.000697985	0.000550003	0.0082263	12	Cytochrome c, somatic OS=Rattus norvegicus OX=10116 GN=Cycs PE=1 SV=2
Hippocampus	Q80U96	Xpo1	4.48668e-05	4.65708e-05	5.28557e-05	6.08173e-05	4.91473e-05	3.04229e-05	6.62801e-05	4.53532e-05	5.93815e-05	1.75934e-05	2.84094e-05	6.50061e-05	0.000566704	12	Exportin-1 OS=Rattus norvegicus OX=10116 GN=Xpo1 PE=1 SV=1
Hippocampus	Q5PQN0	Ncald	7.80851e-05	6.35087e-05	3.71686e-05	4.10724e-05	4.98822e-05	2.7499e-05	6.6626e-05	2.00705e-05	4.51846e-05	4.68559e-05	2.61909e-05	3.70097e-05	0.000539154	12	Neurocalcin-delta OS=Rattus norvegicus OX=10116 GN=Ncald PE=1 SV=3
Hippocampus	P43278	H1-0	2.2606e-05	2.0012e-05	3.93178e-06	5.33198e-06	3.8959e-05	1.55973e-05	1.87467e-05	1.97233e-05	1.60145e-05	2.08487e-05	1.75859e-05	2.70254e-05	0.000226382	12	Histone H1.0 OS=Rattus norvegicus OX=10116 GN=H1-0 PE=2 SV=2
Hippocampus	P13852	Prnp	2.84903e-05	3.39014e-05	3.86133e-06	8.03344e-06	3.99806e-05	1.25485e-05	3.1808e-05	1.4592e-05	3.06873e-05	3.1581e-05	2.89442e-05	3.40584e-05	0.000298487	12	Major prion protein OS=Rattus norvegicus OX=10116 GN=Prnp PE=1 SV=2
Hippocampus	Q9WVB1	Rab6a	0.000128683	0.000108532	0.000136571	0.00011413	7.76075e-05	5.7639e-05	6.48529e-05	7.00113e-05	9.83451e-05	7.43257e-05	8.29869e-05	7.12053e-05	0.00108489	12	Ras-related protein Rab-6A OS=Rattus norvegicus OX=10116 GN=Rab6a PE=1 SV=2
Hippocampus	P01830	Thy1	0.000390322	0.000444324	0.00017669	0.000156664	0.000443761	0.000226018	0.00075362	0.000681552	0.000472787	0.000394663	0.000454823	0.000308394	0.00490362	12	Thy-1 membrane glycoprotein OS=Rattus norvegicus OX=10116 GN=Thy1 PE=1 SV=1
Hippocampus	P54319	Plaa	3.10729e-06	9.28868e-07	3.84344e-06	5.02102e-06	3.98745e-06	1.55942e-05	2.22257e-06	4.6689e-05	1.01839e-05	2.9398e-05	5.06075e-05	4.22363e-06	0.000175807	12	Phospholipase A-2-activating protein OS=Rattus norvegicus OX=10116 GN=Plaa PE=1 SV=3
Hippocampus	P62963	Pfn1	0.000506771	0.000693666	0.000713045	0.000699099	0.000470943	0.000680133	0.000614102	0.000489592	0.000656039	0.000824146	0.000684168	0.000495376	0.00752708	12	Profilin-1 OS=Rattus norvegicus OX=10116 GN=Pfn1 PE=1 SV=2
Hippocampus	O35828	Coro7	3.24405e-06	1.64194e-06	4.89906e-06	7.14204e-07	4.56966e-06	3.27583e-06	4.61871e-06	4.00608e-06		1.14038e-06	1.71204e-07		2.82811e-05	10	Coronin-7 OS=Rattus norvegicus OX=10116 GN=Coro7 PE=1 SV=2
Hippocampus	Q4KLH4	Pspc1	6.15253e-06	1.42479e-05	9.53922e-06	4.46333e-06	1.08937e-05	2.26337e-05	5.19045e-05	3.86784e-06	5.07517e-06	5.71873e-06	3.59064e-07	6.31117e-06	0.000141167	12	Paraspeckle component 1 OS=Rattus norvegicus OX=10116 GN=Pspc1 PE=1 SV=1
Hippocampus	Q32Q06	Ap1m1	1.35732e-05	8.46501e-06	1.01725e-05	1.22228e-05	1.51193e-05	1.58736e-05	1.45473e-05	1.12167e-05	6.0156e-05	1.16906e-05	9.45756e-06	2.12184e-05	0.000203713	12	AP-1 complex subunit mu-1 OS=Rattus norvegicus OX=10116 GN=Ap1m1 PE=1 SV=3
Hippocampus	Q9QYF3	Myo5a	0.000101662	0.000148159	0.000111625	0.000139509	0.00013248	0.000102861	0.000272513	0.000181227	0.000228781	0.000106507	9.44274e-05	0.000191396	0.00181115	12	Unconventional myosin-Va OS=Rattus norvegicus OX=10116 GN=Myo5a PE=1 SV=1
Hippocampus	P62628	Dynlrb1	3.3543e-05	1.89768e-05	3.07814e-05	3.10387e-05	3.98696e-05	1.81183e-05	2.92154e-05	2.41931e-05	2.19446e-05	5.1364e-05	2.99197e-05	4.34358e-05	0.0003724	12	Dynein light chain roadblock-type 1 OS=Rattus norvegicus OX=10116 GN=Dynlrb1 PE=1 SV=3
Hippocampus	Q9Z0V6	Prdx3	0.0001638	0.000163023	0.000233547	0.000205312	0.000134878	0.000148553	0.000201159	0.000248834	8.32558e-05	0.000153052	0.000194746	0.000207258	0.00213742	12	Thioredoxin-dependent peroxide reductase, mitochondrial OS=Rattus norvegicus OX=10116 GN=Prdx3 PE=1 SV=2
Hippocampus	Q63416	Itih3	3.77775e-05	4.08321e-05	5.27757e-06	3.05433e-05	2.55429e-05		5.791e-05	6.70655e-06	1.45359e-05	3.63221e-05	4.86315e-05	9.27041e-05	0.000396783	11	Inter-alpha-trypsin inhibitor heavy chain H3 OS=Rattus norvegicus OX=10116 GN=Itih3 PE=2 SV=1
Hippocampus	Q64560	Tpp2	4.34978e-05	4.09475e-05	2.57643e-05	2.69758e-05	7.02447e-05	3.02101e-05	2.19761e-05	1.93487e-05	3.17518e-05	4.46476e-05	7.47296e-05	5.99324e-05	0.000490027	12	Tripeptidyl-peptidase 2 OS=Rattus norvegicus OX=10116 GN=Tpp2 PE=2 SV=3
Hippocampus	P36876	Ppp2r2a	2.67616e-05	1.68306e-05	1.02e-05	1.7589e-05	3.51813e-05	2.24336e-05	1.28559e-05	1.6201e-05	1.9886e-05	2.45612e-05	1.74543e-05	2.66924e-05	0.000246647	12	Serine/threonine-protein phosphatase 2A 55 kDa regulatory subunit B alpha isoform OS=Rattus norvegicus OX=10116 GN=Ppp2r2a PE=2 SV=1
Hippocampus	P62083	Rps7	9.02967e-05	0.000122703	5.57293e-05	6.62288e-05	0.000120891	0.000120911	0.000110921	6.62197e-05	0.000104629	7.56432e-05	5.65044e-05	0.000109965	0.00110064	12	40S ribosomal protein S7 OS=Rattus norvegicus OX=10116 GN=Rps7 PE=1 SV=1
Hippocampus	Q9JJ19	Slc9a3r1	3.72002e-05	1.52015e-05	3.93485e-06	1.04149e-05	2.43512e-05	1.45159e-05	1.69509e-05	1.68456e-05	1.24908e-05	1.76309e-05	1.25895e-05	1.9142e-05	0.000201268	12	Na(+)/H(+) exchange regulatory cofactor NHE-RF1 OS=Rattus norvegicus OX=10116 GN=Slc9a3r1 PE=1 SV=3
Hippocampus	Q5I0D1	Glod4	3.07706e-05	2.24386e-05	1.24866e-05	1.36953e-05	2.28352e-05	7.17356e-07	4.81585e-06	5.40126e-06	8.32682e-06	1.86693e-05	1.33062e-05	2.6596e-05	0.000180059	12	Glyoxalase domain-containing protein 4 OS=Rattus norvegicus OX=10116 GN=Glod4 PE=1 SV=1
Hippocampus	P17074	Rps19	3.87604e-05	5.83055e-05	1.02884e-05	6.10841e-05	6.34088e-05	3.56229e-05	5.22568e-05	3.387e-05	5.66204e-05	2.46613e-05	3.0511e-05	5.61842e-05	0.000521574	12	40S ribosomal protein S19 OS=Rattus norvegicus OX=10116 GN=Rps19 PE=2 SV=3
Hippocampus	P97615	Txn2	1.20507e-05	1.38389e-05	1.38122e-05	1.05019e-05	1.39038e-05	1.46883e-05	1.18071e-05	9.84736e-06	6.60709e-06		1.35558e-05	1.40903e-05	0.000134703	11	Thioredoxin, mitochondrial OS=Rattus norvegicus OX=10116 GN=Txn2 PE=2 SV=1
Hippocampus	P62856	Rps26	2.00817e-05	2.17317e-05	2.45519e-05	2.67759e-05	2.3983e-05	1.86041e-05	4.59956e-05	2.90596e-05	2.77388e-05	1.29662e-05	2.27197e-05	2.17535e-05	0.000295962	12	40S ribosomal protein S26 OS=Rattus norvegicus OX=10116 GN=Rps26 PE=3 SV=3
Hippocampus	Q925N3	Pex5l	4.21527e-06	4.89609e-06	8.92767e-06	2.24527e-06	5.18299e-06	4.38349e-06	3.4292e-06	4.36742e-06	1.33393e-06	2.51527e-06	5.11386e-06	3.17352e-06	4.9784e-05	12	PEX5-related protein OS=Rattus norvegicus OX=10116 GN=Pex5l PE=1 SV=1
Hippocampus	P19468	Gclc	1.05469e-05	6.26844e-06	1.18174e-05	2.12876e-05	4.69788e-06	7.23883e-06	4.47752e-06	4.68418e-06	5.79673e-06	5.43248e-06	1.20906e-05	9.15324e-06	0.000103492	12	Glutamate--cysteine ligase catalytic subunit OS=Rattus norvegicus OX=10116 GN=Gclc PE=1 SV=2
Hippocampus	Q9Z339	Gsto1	0.000117098	0.000200862	0.000108419	0.000110079	0.000104848	0.000131147	6.5423e-05	9.47835e-05	7.93169e-05	0.000216392	0.000112238	0.00013213	0.00147274	12	Glutathione S-transferase omega-1 OS=Rattus norvegicus OX=10116 GN=Gsto1 PE=1 SV=2
Hippocampus	Q64057	Aldh7a1	4.15947e-05	0.000132961	4.2627e-05	5.4067e-05	3.2183e-05	0.000112082	3.82232e-05	4.58745e-05	3.38645e-05	9.08108e-05	7.095e-05	0.000137392	0.00083263	12	Alpha-aminoadipic semialdehyde dehydrogenase OS=Rattus norvegicus OX=10116 GN=Aldh7a1 PE=1 SV=2
Hippocampus	P19234	Ndufv2	1.78473e-05	8.01164e-06	2.99895e-06	1.99457e-06			2.89578e-05	6.6992e-05	3.03873e-05	5.20279e-05	3.88768e-05	8.23818e-06	0.000256333	10	NADH dehydrogenase [ubiquinone] flavoprotein 2, mitochondrial OS=Rattus norvegicus OX=10116 GN=Ndufv2 PE=1 SV=2
Hippocampus	Q498R7	Czib	9.42954e-06	4.39909e-06		5.85829e-06	1.00737e-05	7.41262e-06		2.65511e-06	2.10593e-06	2.4362e-05	5.42111e-06	4.33863e-06	7.6056e-05	10	CXXC motif containing zinc binding protein OS=Rattus norvegicus OX=10116 GN=Czib PE=2 SV=1
Hippocampus	P47728	Calb2	2.36494e-05	7.8152e-06	3.81455e-05	8.13342e-05	2.55246e-06	1.696e-06	1.73592e-05	3.13551e-06	2.61516e-05	1.65865e-05	1.29051e-06	2.21759e-05	0.000241892	12	Calretinin OS=Rattus norvegicus OX=10116 GN=Calb2 PE=1 SV=1
Hippocampus	P62859	Rps28	3.97322e-05	6.39853e-05	3.55307e-05	4.73286e-05	4.2119e-05	3.41005e-05	6.08386e-05	5.02779e-05	4.85579e-05	5.86176e-05	4.15598e-05	5.4618e-05	0.000577266	12	40S ribosomal protein S28 OS=Rattus norvegicus OX=10116 GN=Rps28 PE=1 SV=1
Hippocampus	Q9Z0J8	Negr1	6.96673e-06	7.30196e-06			4.80352e-06	4.56135e-06	5.22706e-05	1.6798e-05	1.98528e-05	8.25079e-06	6.55272e-06	1.10974e-05	0.000138456	10	Neuronal growth regulator 1 OS=Rattus norvegicus OX=10116 GN=Negr1 PE=1 SV=1
Hippocampus	P10362	Scg2	4.20353e-05	2.14939e-05	2.18449e-05	5.33016e-05	3.53863e-05	2.04464e-05	4.70242e-05	6.97027e-05	5.91199e-05	1.61209e-05	1.18123e-05	1.85201e-05	0.000416808	12	Secretogranin-2 OS=Rattus norvegicus OX=10116 GN=Scg2 PE=1 SV=1
Hippocampus	P13668	Stmn1		2.65777e-06	0.000108714	0.000102551		3.69386e-05		4.75091e-05	5.61461e-05		5.83607e-05	4.13862e-05	0.000454264	8	Stathmin OS=Rattus norvegicus OX=10116 GN=Stmn1 PE=1 SV=2
Hippocampus	P29066	Arrb1	2.3704e-05	2.22395e-05	2.15151e-05	2.48811e-05	1.51392e-05	2.11808e-05	1.95051e-05	2.16903e-05	1.60451e-05	3.971e-05	1.19844e-05	2.78685e-05	0.000265463	12	Beta-arrestin-1 OS=Rattus norvegicus OX=10116 GN=Arrb1 PE=1 SV=1
Hippocampus	Q562C6	Lztfl1		2.64303e-06	2.38524e-05			1.68009e-05		8.98647e-06		1.58917e-05	2.16126e-05		8.97871e-05	6	Leucine zipper transcription factor-like protein 1 OS=Rattus norvegicus OX=10116 GN=Lztfl1 PE=2 SV=1
Hippocampus	Q64536	Pdk2	1.60261e-05	1.32345e-05	4.53123e-06	1.07439e-05	7.96593e-06		1.06024e-05	8.28054e-06	4.87797e-06		1.84396e-05	9.60793e-06	0.00010431	10	[Pyruvate dehydrogenase (acetyl-transferring)] kinase isozyme 2, mitochondrial OS=Rattus norvegicus OX=10116 GN=Pdk2 PE=1 SV=1
Hippocampus	D4A4T9	Chordc1	1.24254e-05	6.57017e-06	1.20509e-06	6.36488e-06	7.6672e-06	5.51939e-06		4.06742e-06	6.06433e-06	1.01069e-05	2.56799e-06	8.24845e-06	7.08072e-05	11	Cysteine and histidine-rich domain-containing protein 1 OS=Rattus norvegicus OX=10116 GN=Chordc1 PE=3 SV=1
Hippocampus	P63324	Rps12	5.23366e-05	9.45679e-05	3.98279e-05	5.49411e-05	7.45697e-05	6.7836e-05	9.52392e-05	4.87993e-05	7.98706e-05	3.6587e-05	5.54676e-05	6.60014e-05	0.000766044	12	40S ribosomal protein S12 OS=Rattus norvegicus OX=10116 GN=Rps12 PE=1 SV=2
Hippocampus	P37996	Arl3	2.64453e-05	3.12236e-05	2.35417e-05	3.93039e-05	2.33602e-05	1.28412e-05	2.69921e-05	2.11678e-05	1.83627e-05	1.82829e-05	2.07834e-05	2.39656e-05	0.00028627	12	ADP-ribosylation factor-like protein 3 OS=Rattus norvegicus OX=10116 GN=Arl3 PE=1 SV=2
Hippocampus	P42676	Nln	2.07368e-06	2.4173e-06	4.35446e-06	3.2233e-06	2.90613e-06	1.51542e-06	4.24227e-06	1.51133e-06	9.49237e-07	2.35785e-06	8.9747e-06	3.99741e-06	3.85231e-05	12	Neurolysin, mitochondrial OS=Rattus norvegicus OX=10116 GN=Nln PE=1 SV=1
Hippocampus	Q6MG82	Prrt1	1.30199e-05		1.04457e-05			1.00353e-05				2.29862e-05	1.1675e-05	8.43251e-06	7.65946e-05	6	Proline-rich transmembrane protein 1 OS=Rattus norvegicus OX=10116 GN=Prrt1 PE=1 SV=2
Hippocampus	P63041	Cplx1	5.26616e-05	4.80157e-05	3.46812e-05	4.36389e-05	7.01895e-05	4.4777e-05	2.55311e-05	3.03954e-05	4.17765e-05	5.38258e-05	3.37798e-05	5.39247e-05	0.000533197	12	Complexin-1 OS=Rattus norvegicus OX=10116 GN=Cplx1 PE=1 SV=1
Hippocampus	P62275	Rps29	3.74274e-06	1.22344e-05	4.93157e-06	3.77648e-06	1.08787e-05		8.30728e-06	2.79377e-06	6.0748e-06	1.66152e-05	2.20866e-06	9.95873e-06	8.15223e-05	11	40S ribosomal protein S29 OS=Rattus norvegicus OX=10116 GN=Rps29 PE=1 SV=2
Hippocampus	P60905	Dnajc5	5.38378e-05	8.0687e-05	6.50558e-05	3.74589e-05	6.35928e-05	5.94642e-05	0.000109017	6.55195e-05	0.000105639	7.79842e-05	3.88107e-05	5.64413e-05	0.000813508	12	DnaJ homolog subfamily C member 5 OS=Rattus norvegicus OX=10116 GN=Dnajc5 PE=1 SV=1
Hippocampus	P28818	Rasgrf1	5.29291e-06	7.46977e-06	1.34459e-05	7.72616e-06	5.57155e-06	2.11435e-06	5.16929e-06	1.64675e-06	2.97965e-06	1.4427e-05	7.30639e-07	8.19675e-06	7.47707e-05	12	Ras-specific guanine nucleotide-releasing factor 1 OS=Rattus norvegicus OX=10116 GN=Rasgrf1 PE=1 SV=1
Hippocampus	Q6AYT3	Rtcb	6.42451e-05	7.72053e-05	5.11048e-05	5.8887e-05	6.01837e-05	3.5232e-05	3.99109e-05	2.5889e-05	3.28259e-05	1.65089e-05	2.87622e-05	7.28981e-05	0.000563653	12	RNA-splicing ligase RtcB homolog OS=Rattus norvegicus OX=10116 GN=Rtcb PE=2 SV=1
Hippocampus	Q7M767	Ube2v2	7.62284e-05	0.000152091	0.000116544	0.000104848	0.000113051	7.6071e-05	8.66479e-05	4.74034e-05	0.000114617	9.32361e-05	8.34549e-05	8.97278e-05	0.00115392	12	Ubiquitin-conjugating enzyme E2 variant 2 OS=Rattus norvegicus OX=10116 GN=Ube2v2 PE=1 SV=3
Hippocampus	P62271	Rps18	7.55248e-05	0.000125433	7.16113e-05	9.70709e-05	0.000101438	5.4691e-05	0.0001595	9.98918e-05	0.000122794	0.000116269	8.0945e-05	0.000116054	0.00122122	12	40S ribosomal protein S18 OS=Rattus norvegicus OX=10116 GN=Rps18 PE=1 SV=3
Hippocampus	Q8K4Y5	Lgi1	4.03029e-05	2.72929e-05		7.21819e-06	3.20353e-05	9.23751e-06	7.57697e-05	6.76532e-05	3.03256e-05	1.64952e-05	3.19929e-05	2.12382e-05	0.000359562	11	Leucine-rich glioma-inactivated protein 1 OS=Rattus norvegicus OX=10116 GN=Lgi1 PE=1 SV=1
Hippocampus	P24473	Gstk1	4.13278e-06	6.38412e-06	4.23002e-06	2.64922e-06	2.8868e-06	6.26025e-07	4.68844e-06		1.56182e-06	6.81913e-06	2.07276e-06	9.68961e-06	4.57407e-05	11	Glutathione S-transferase kappa 1 OS=Rattus norvegicus OX=10116 GN=Gstk1 PE=1 SV=3
Hippocampus	P31662	Slc6a17	2.48933e-05	5.72101e-05	7.48475e-06	2.78157e-05	3.1655e-05	1.56144e-05	9.28514e-05	5.43402e-05	0.000100408	3.86943e-05	1.3246e-05	3.84496e-05	0.000502663	12	Sodium-dependent neutral amino acid transporter SLC6A17 OS=Rattus norvegicus OX=10116 GN=Slc6a17 PE=1 SV=1
Hippocampus	O54924	Exoc8	1.64773e-05	2.12815e-05	1.42522e-05	2.0923e-05	9.82582e-06	6.12444e-06	1.15487e-05	1.26105e-05	1.0962e-05	4.74462e-05	1.29585e-05	1.57881e-05	0.000200198	12	Exocyst complex component 8 OS=Rattus norvegicus OX=10116 GN=Exoc8 PE=1 SV=1
Hippocampus	Q4VSI4	Usp7	2.98619e-05	4.89245e-06	1.90781e-06	3.36998e-06	7.66491e-06	2.08387e-06	1.98972e-06	8.92654e-07	3.537e-05	1.63921e-06	1.53615e-06	6.5895e-05	0.000157104	12	Ubiquitin carboxyl-terminal hydrolase 7 OS=Rattus norvegicus OX=10116 GN=Usp7 PE=1 SV=1
Hippocampus	Q923S8	Pank4	1.80137e-06			1.06663e-06	1.52492e-06		2.51916e-07		3.34518e-07		6.61152e-07	1.76197e-06	7.40248e-06	7	4'-phosphopantetheine phosphatase OS=Rattus norvegicus OX=10116 GN=Pank4 PE=1 SV=1
Hippocampus	Q62915	Cask	0.000184067	0.000101807	0.000103764	7.80056e-05	3.11054e-05	5.66102e-05	0.000134533	1.95389e-05	2.1597e-05	0.000278248	9.56343e-05	8.36366e-05	0.00118855	12	Peripheral plasma membrane protein CASK OS=Rattus norvegicus OX=10116 GN=Cask PE=1 SV=1
Hippocampus	P82471	Gnaq	6.33738e-06	1.15836e-05		3.73788e-06	2.98833e-05	1.12369e-05	2.31551e-05	3.70629e-05	1.61848e-05	1.41906e-05	2.66222e-05	1.93983e-05	0.000199393	11	Guanine nucleotide-binding protein G(q) subunit alpha OS=Rattus norvegicus OX=10116 GN=Gnaq PE=2 SV=2
Hippocampus	P18298	Mat2a	8.74975e-06	7.62024e-06	1.37977e-05	1.48739e-05	9.17714e-06	9.92428e-06	5.45904e-06	7.8577e-06		9.60187e-06	1.25111e-05	1.1092e-05	0.000110665	11	S-adenosylmethionine synthase isoform type-2 OS=Rattus norvegicus OX=10116 GN=Mat2a PE=1 SV=1
Hippocampus	O70257	Stx7	2.01266e-06	2.50405e-06		1.12562e-06		3.97409e-07	9.825e-06	9.58737e-06	2.19587e-06	7.50438e-06	1.38352e-06	1.49037e-06	3.80263e-05	10	Syntaxin-7 OS=Rattus norvegicus OX=10116 GN=Stx7 PE=1 SV=4
Hippocampus	A0A0G2JV04	Gga3	5.98273e-06	8.74519e-06	6.92297e-06	6.72319e-06	1.96334e-06	5.06995e-06	4.75638e-06	0.000111847		7.79041e-06	5.32906e-06	6.6576e-06	0.000171788	11	ADP-ribosylation factor-binding protein GGA3 OS=Rattus norvegicus OX=10116 GN=Gga3 PE=1 SV=1
Hippocampus	Q5PQJ6	Pycr3	6.09088e-06	1.74093e-06	5.68888e-06	5.2822e-06	2.84381e-06				6.35753e-06		6.0664e-06	1.40302e-05	4.81008e-05	8	Pyrroline-5-carboxylate reductase 3 OS=Rattus norvegicus OX=10116 GN=Pycr3 PE=2 SV=1
Hippocampus	P70619	Gsr	6.93907e-06	7.65636e-06	1.28516e-05	4.07798e-06	1.33622e-05	5.10473e-06		4.39136e-06		8.93958e-06	4.40183e-06	5.36155e-06	7.30862e-05	10	Glutathione reductase (Fragment) OS=Rattus norvegicus OX=10116 GN=Gsr PE=2 SV=2
Hippocampus	Q63450	Camk1	3.35352e-05	4.74494e-05	4.97804e-05	1.78671e-05	2.4073e-05	1.39897e-05	2.24942e-05	4.99607e-06	1.95099e-05	9.93171e-06	1.51132e-05	2.73966e-05	0.000286136	12	Calcium/calmodulin-dependent protein kinase type 1 OS=Rattus norvegicus OX=10116 GN=Camk1 PE=1 SV=2
Hippocampus	O35458	Slc32a1	8.67811e-06	3.44651e-05	7.34702e-06	1.59803e-05	9.57634e-05	1.17645e-05	4.26361e-05	5.10351e-05	0.000189862	2.60992e-05	7.02805e-06	4.5077e-05	0.000535736	12	Vesicular inhibitory amino acid transporter OS=Rattus norvegicus OX=10116 GN=Slc32a1 PE=1 SV=1
Hippocampus	P06302	Ptma	6.59879e-06	5.88153e-06	3.55645e-06	5.29664e-06	1.27593e-05	4.43087e-06	2.08981e-06	6.29139e-06	4.72653e-06	7.3192e-06	4.15097e-06	6.2336e-06	6.9335e-05	12	Prothymosin alpha OS=Rattus norvegicus OX=10116 GN=Ptma PE=1 SV=2
Hippocampus	A1L1I3	Numbl	4.24496e-06			4.20443e-06	4.84583e-06		2.05605e-05	7.7782e-06	1.49727e-05		6.05817e-06	2.7442e-06	6.5409e-05	8	Numb-like protein OS=Rattus norvegicus OX=10116 GN=Numbl PE=1 SV=1
Hippocampus	P12785	Fasn	0.000470733	0.000526389	0.000325106	0.000344761	0.000600592	0.000272659	0.000143041	0.000236551	0.000485439	0.000350879	0.000133068	0.000234959	0.00412418	12	Fatty acid synthase OS=Rattus norvegicus OX=10116 GN=Fasn PE=1 SV=3
Hippocampus	P11598	Pdia3	0.000460055	0.000471772	0.000320228	0.000328321	0.00100374	0.000476935	0.000378124	0.000504515	0.000441081	0.000295303	0.000270154	0.000399806	0.00535003	12	Protein disulfide-isomerase A3 OS=Rattus norvegicus OX=10116 GN=Pdia3 PE=1 SV=2
Hippocampus	P04642	Ldha	0.001816	0.00185346	0.00205388	0.0020661	0.00142194	0.00139816	0.0015383	0.00175043	0.00254168	0.00150317	0.00136412	0.00157502	0.0208823	12	L-lactate dehydrogenase A chain OS=Rattus norvegicus OX=10116 GN=Ldha PE=1 SV=1
Hippocampus	P55161	Nckap1	0.000376327	0.000291359	0.000213146	0.000186376	0.000314548	0.000190314	0.000364857	0.000274076	0.000271564	0.000220597	0.000227414	0.000230344	0.00316092	12	Nck-associated protein 1 OS=Rattus norvegicus OX=10116 GN=Nckap1 PE=2 SV=1
Hippocampus	P10719	Atp5f1b	0.00111428	0.000954927	0.000422355	0.000362789	0.000907488	0.000518837	0.00125519	0.00200738	0.00136618	0.00127722	0.00165061	0.0008623	0.0126996	12	ATP synthase subunit beta, mitochondrial OS=Rattus norvegicus OX=10116 GN=Atp5f1b PE=1 SV=2
Hippocampus	P63086	Mapk1	0.000339987	0.000245712	0.000179981	0.000367411	0.000317669	0.000230771	0.000295809	0.000307648	0.000260438	0.000262202	0.00026316	0.000345673	0.00341646	12	Mitogen-activated protein kinase 1 OS=Rattus norvegicus OX=10116 GN=Mapk1 PE=1 SV=3
Hippocampus	P38650	Dync1h1	0.00163952	0.00128226	0.00113802	0.00126127	0.00127375	0.00093653	0.00124888	0.000705685	0.00115191	0.00101425	0.000865159	0.00138208	0.0138993	12	Cytoplasmic dynein 1 heavy chain 1 OS=Rattus norvegicus OX=10116 GN=Dync1h1 PE=1 SV=1
Hippocampus	Q5XI83	Vps35l	3.32708e-06	3.10033e-06	3.90643e-06	2.2716e-06	8.1275e-07		3.39191e-06	1.88532e-06	1.31419e-06	1.09006e-06	6.22521e-07	4.17096e-06	2.58931e-05	11	VPS35 endosomal protein-sorting factor-like OS=Rattus norvegicus OX=10116 GN=Vps35l PE=2 SV=1
Hippocampus	P53678	Ap3m2	2.64273e-05	3.67024e-05	1.72114e-05	3.91424e-05	2.79262e-05	2.03918e-05	3.03697e-05	1.31044e-05	2.39225e-05	2.11786e-05	1.93384e-05	4.27393e-05	0.000318454	12	AP-3 complex subunit mu-2 OS=Rattus norvegicus OX=10116 GN=Ap3m2 PE=2 SV=1
Hippocampus	Q641Z6	Ehd1	4.75154e-05	2.04091e-05	6.4733e-06		6.11819e-05	9.07696e-06	1.2843e-05	3.79308e-06	3.72514e-06	1.10796e-05	8.30639e-06	1.21546e-05	0.000196558	11	EH domain-containing protein 1 OS=Rattus norvegicus OX=10116 GN=Ehd1 PE=1 SV=1
Hippocampus	P56571	ES1 protein homolog, mitochondrial OS=Rattus norvegicus OX=10116	0.000177963	0.000151305	0.000124432	0.000120806	0.000156732	0.000167314	0.000132794	0.00012434	0.000125363	0.000142895	0.000154751	0.00021209	0.00179079	12	ES1 protein homolog, mitochondrial OS=Rattus norvegicus OX=10116 PE=1 SV=2
Hippocampus	P52873	Pc	0.00011038	0.000117087	0.000103501	5.27169e-05	0.000217105	0.000120546	9.85945e-05	5.34039e-05	2.03255e-05	9.75541e-05	8.3551e-05	0.000124183	0.00119895	12	Pyruvate carboxylase, mitochondrial OS=Rattus norvegicus OX=10116 GN=Pc PE=1 SV=2
Hippocampus	P60892	Prps1	3.55131e-05	3.17136e-05	2.68131e-05	4.0981e-05	2.17301e-05	2.12234e-05	3.06421e-05	3.22472e-05	2.85862e-05	1.60214e-05	2.37106e-05	4.72213e-05	0.000356403	12	Ribose-phosphate pyrophosphokinase 1 OS=Rattus norvegicus OX=10116 GN=Prps1 PE=1 SV=2
Hippocampus	P56558	Ogt	6.28322e-05	4.57538e-05	4.42557e-05	4.64799e-05	3.97201e-05	4.16669e-05	3.282e-05	2.33774e-05	3.49989e-05	5.49084e-05	1.75173e-05	4.4245e-05	0.000488576	12	UDP-N-acetylglucosamine--peptide N-acetylglucosaminyltransferase 110 kDa subunit OS=Rattus norvegicus OX=10116 GN=Ogt PE=1 SV=1
Hippocampus	Q8VI04	Asrgl1	0.000304062	0.000310216	0.000308099	0.000406543	0.000247363	0.000201918	0.000396198	0.00035323	0.000155702	0.000284036	0.000264856	0.000268161	0.00350038	12	Isoaspartyl peptidase/L-asparaginase OS=Rattus norvegicus OX=10116 GN=Asrgl1 PE=1 SV=1
Hippocampus	P41565	Idh3g	0.000214827	0.000205925	0.00016601	0.000204774	0.000222572	0.00016847	0.000227874	0.000155126	9.19688e-05	0.000199714	0.000232478	0.000229473	0.00231921	12	Isocitrate dehydrogenase [NAD] subunit gamma 1, mitochondrial OS=Rattus norvegicus OX=10116 GN=Idh3g PE=1 SV=2
Hippocampus	Q568Z9	Phyhip	0.00024185	0.000144137	0.000174877	0.000111401	0.000168383	0.000217533	0.000155324	0.000131663	9.81563e-05	0.000166689	0.000131212	0.000172435	0.00191366	12	Phytanoyl-CoA hydroxylase-interacting protein OS=Rattus norvegicus OX=10116 GN=Phyhip PE=2 SV=1
Hippocampus	Q66HA8	Hsph1	0.000298636	0.000251224	0.000265084	0.00028209	0.000322751	0.0002616	0.000238348	0.000283947	0.000365335	0.000322952	0.000218616	0.000288354	0.00339894	12	Heat shock protein 105 kDa OS=Rattus norvegicus OX=10116 GN=Hsph1 PE=1 SV=1
Hippocampus	P32851	Stx1a	3.36398e-05	5.78883e-05	9.38493e-05	0.000128976	5.50216e-05	1.91805e-05	0.000234057	0.00016479	0.000103942	6.78678e-05	0.000176162	6.99307e-05	0.00120531	12	Syntaxin-1A OS=Rattus norvegicus OX=10116 GN=Stx1a PE=1 SV=1
Hippocampus	Q2PQA9	Kif5b	9.18589e-06	8.14955e-06	4.91855e-07	1.08856e-05	9.41433e-06	8.27062e-06	1.20676e-05	9.73149e-06	1.45375e-05	1.42745e-05	1.21469e-05	1.18187e-05	0.000120974	12	Kinesin-1 heavy chain OS=Rattus norvegicus OX=10116 GN=Kif5b PE=1 SV=1
Hippocampus	Q5SGE0	Lrpprc	8.80038e-06	1.41713e-05	1.87258e-05	7.44858e-06	1.48535e-05	2.34668e-05	1.0958e-05	4.55977e-06	2.37253e-06	7.35758e-05	2.47596e-05	2.13555e-05	0.000225047	12	Leucine-rich PPR motif-containing protein, mitochondrial OS=Rattus norvegicus OX=10116 GN=Lrpprc PE=1 SV=1
Hippocampus	Q5GFD9	Impact	0.000123358	9.87383e-05	0.000107536	0.000159662	7.14731e-05	7.6889e-05	9.78612e-05	6.42564e-05	0.000128756	4.13582e-05	4.5596e-05	0.00014434	0.00115982	12	Protein IMPACT OS=Rattus norvegicus OX=10116 GN=Impact PE=1 SV=1
Hippocampus	P63039	Hspd1	0.00127915	0.00137361	0.00103453	0.00108611	0.00109885	0.000867806	0.00135276	0.00113119	0.000683692	0.00126461	0.00109253	0.0011746	0.0134394	12	60 kDa heat shock protein, mitochondrial OS=Rattus norvegicus OX=10116 GN=Hspd1 PE=1 SV=1
Hippocampus	P28023	Dctn1	0.000113063	0.000164887	0.000135971	0.000154808	0.000143798	0.000137179	0.000145229	9.83279e-05	0.000126008	0.000116091	0.000111084	0.000181734	0.00162818	12	Dynactin subunit 1 OS=Rattus norvegicus OX=10116 GN=Dctn1 PE=1 SV=2
Hippocampus	A0A0G2JTR4	Abr	2.43183e-05	2.265e-05	3.43662e-05	3.42221e-05	1.62711e-05	3.5127e-05	2.40633e-05	2.02673e-05	1.90569e-05	3.97572e-05	8.99066e-06	3.37138e-05	0.000312804	12	Active breakpoint cluster region-related protein OS=Rattus norvegicus OX=10116 GN=Abr PE=1 SV=2
Hippocampus	P67874	Csnk2b	9.64616e-05	4.61175e-05	4.98001e-05	4.66694e-05	4.18708e-05	4.31112e-05	3.97282e-05	3.05835e-05	5.29552e-05	0.00010223	4.65505e-05	3.68801e-05	0.000632958	12	Casein kinase II subunit beta OS=Rattus norvegicus OX=10116 GN=Csnk2b PE=1 SV=1
Hippocampus	P53534	Pygb	0.00117903	0.00110695	0.00106861	0.00112105	0.00111403	0.0011116	0.000791127	0.000633736	0.000595132	0.00113906	0.00081164	0.000962425	0.0116344	12	Glycogen phosphorylase, brain form (Fragment) OS=Rattus norvegicus OX=10116 GN=Pygb PE=1 SV=3
Hippocampus	P62260	Ywhae	0.00220332	0.00231848	0.0019725	0.00209564	0.00224359	0.00199792	0.00194785	0.00178669	0.00163931	0.00143969	0.00177023	0.0025546	0.0239698	12	14-3-3 protein epsilon OS=Rattus norvegicus OX=10116 GN=Ywhae PE=1 SV=1
Hippocampus	Q6PCT3	Tpd52l2	2.16572e-05	2.10411e-05	2.70697e-05	2.17404e-05	2.83236e-05	2.96037e-05	2.39746e-05	1.41931e-05	3.77317e-05	3.46563e-05	1.94299e-05	3.12518e-05	0.000310673	12	Tumor protein D54 OS=Rattus norvegicus OX=10116 GN=Tpd52l2 PE=1 SV=1
Hippocampus	B2GV54	Nceh1	3.30769e-06	2.04959e-05	1.45881e-06	2.92437e-06	4.49873e-05	7.17564e-06	2.26087e-05	1.06715e-05	1.18697e-05	1.61167e-06	2.83618e-06	2.1195e-05	0.000151142	12	Neutral cholesterol ester hydrolase 1 OS=Rattus norvegicus OX=10116 GN=Nceh1 PE=1 SV=1
Hippocampus	P38656	Ssb	8.95339e-06	1.09253e-05	1.49101e-05	1.56032e-05	1.0042e-05	1.28239e-05	2.04709e-05	9.12986e-06	1.9441e-05	1.55149e-05	1.04936e-05	1.87531e-05	0.000167061	12	Lupus La protein homolog OS=Rattus norvegicus OX=10116 GN=Ssb PE=1 SV=1
Hippocampus	P21533	Rpl6	4.4247e-05	9.07468e-05	4.15366e-05	6.19238e-05	8.87045e-05	6.36027e-05	0.000106972	6.45756e-05	9.77287e-05	4.22932e-05	4.81549e-05	9.10872e-05	0.000841573	12	60S ribosomal protein L6 OS=Rattus norvegicus OX=10116 GN=Rpl6 PE=1 SV=5
Hippocampus	Q02563	Sv2a	0.000158438	0.000292984	0.000130898	0.000148567	0.000150794	0.000119477	0.000364132	0.000200197	0.000201231	0.000104564	0.00012314	0.000181916	0.00217634	12	Synaptic vesicle glycoprotein 2A OS=Rattus norvegicus OX=10116 GN=Sv2a PE=1 SV=2
Hippocampus	Q9ER34	Aco2	0.00239553	0.0024584	0.00247408	0.00252386	0.00254742	0.0020302	0.00226458	0.00255457	0.00155632	0.00268749	0.00204713	0.00242492	0.0279645	12	Aconitate hydratase, mitochondrial OS=Rattus norvegicus OX=10116 GN=Aco2 PE=1 SV=2
Hippocampus	P07632	Sod1	0.000500432	0.000329501	0.000632215	0.000557903	0.000490633	0.00058338	0.000482905	0.000360541	0.000323951	0.00081177	0.000512339	0.000477217	0.00606279	12	Superoxide dismutase [Cu-Zn] OS=Rattus norvegicus OX=10116 GN=Sod1 PE=1 SV=2
Hippocampus	P41562	Idh1	6.74118e-05	8.825e-05	5.51828e-05	9.25216e-05	7.62093e-05	4.26506e-05	2.60419e-05	3.34748e-05	6.68451e-05	0.000112806	5.41482e-05	8.20757e-05	0.000797618	12	Isocitrate dehydrogenase [NADP] cytoplasmic OS=Rattus norvegicus OX=10116 GN=Idh1 PE=1 SV=1
Hippocampus	B5DF89	Cul3	3.21312e-05	8.77764e-05	4.34667e-05	5.6196e-05	2.11544e-05	3.84077e-05	2.96902e-05	1.93575e-05	3.07212e-05	1.80405e-05	1.36753e-05	0.000108438	0.000499055	12	Cullin-3 OS=Rattus norvegicus OX=10116 GN=Cul3 PE=1 SV=2
Hippocampus	Q9JJP9	Ubqln1	3.43513e-05	2.18208e-05	1.17799e-05	1.57858e-05	3.70469e-05	1.17699e-05	7.41429e-06	7.1565e-06	1.52303e-05	4.24492e-05	7.37524e-06	3.82984e-05	0.000250479	12	Ubiquilin-1 OS=Rattus norvegicus OX=10116 GN=Ubqln1 PE=1 SV=1
Hippocampus	D3ZQD3	Ogdhl	2.95917e-05	5.2739e-05	2.55991e-06	1.81454e-06	1.70457e-05	6.61218e-06	1.01608e-05	1.77923e-06	2.18984e-06	4.74117e-06	1.03058e-05	5.58121e-05	0.000195352	12	2-oxoglutarate dehydrogenase-like, mitochondrial OS=Rattus norvegicus OX=10116 GN=Ogdhl PE=1 SV=2
Hippocampus	P09606	Glul	0.001393	0.002106	0.00189312	0.00139865	0.00153578	0.00159249	0.00157824	0.00152193	0.0015927	0.00128404	0.00182324	0.00179491	0.0195141	12	Glutamine synthetase OS=Rattus norvegicus OX=10116 GN=Glul PE=1 SV=3
Hippocampus	Q3MIE4	Vat1	1.86645e-05	2.90695e-05	3.74522e-05	4.85342e-05	1.56623e-05	2.03667e-05	2.62928e-05	2.07373e-05	4.13313e-05	1.10934e-05	2.12374e-05	2.47206e-05	0.000315162	12	Synaptic vesicle membrane protein VAT-1 homolog OS=Rattus norvegicus OX=10116 GN=Vat1 PE=1 SV=1
Hippocampus	O08618	Prpsap2	4.11483e-05	2.58311e-05	1.41848e-05	3.0764e-05	2.57056e-05	1.34992e-05	2.24639e-05	2.26003e-05	1.93763e-05	3.04488e-05	2.12051e-05	3.2341e-05	0.000299568	12	Phosphoribosyl pyrophosphate synthase-associated protein 2 OS=Rattus norvegicus OX=10116 GN=Prpsap2 PE=1 SV=1
Hippocampus	Q6RUV5	Rac1	0.000265157	0.000287448	0.000280185	0.000208288	0.000261903	0.000229473	0.000489932	0.000506957	0.000390391	0.000181685	0.000370012	0.000310754	0.00378219	12	Ras-related C3 botulinum toxin substrate 1 OS=Rattus norvegicus OX=10116 GN=Rac1 PE=1 SV=1
Hippocampus	O35764	Nptxr	1.57808e-05	1.70952e-05	4.80342e-06	1.46312e-05	2.33261e-05	1.08646e-05	7.3484e-05	6.27886e-05	0.000140705	1.7827e-05	1.26626e-05	9.84653e-06	0.000403815	12	Neuronal pentraxin receptor OS=Rattus norvegicus OX=10116 GN=Nptxr PE=1 SV=1
Hippocampus	P48721	Hspa9	0.00030934	0.000278713	0.000174055	0.000221441	0.000287038	0.000266552	0.000256399	0.000290337	0.000207016	0.000274298	0.000329393	0.000383557	0.00327814	12	Stress-70 protein, mitochondrial OS=Rattus norvegicus OX=10116 GN=Hspa9 PE=1 SV=3
Hippocampus	P51635	Akr1a1	0.000180261	0.000133449	0.000248822	0.000301114	0.000199534	0.000155308	0.000196156	0.000190535	0.00012793	0.000199373	0.00019326	0.000127955	0.0022537	12	Aldo-keto reductase family 1 member A1 OS=Rattus norvegicus OX=10116 GN=Akr1a1 PE=1 SV=2
Hippocampus	Q9WTV5	Psmd9	1.03672e-05	1.14565e-05	1.10862e-05	1.03522e-05	1.93936e-05	1.27224e-05	8.11209e-06	1.70472e-06	4.90388e-06	1.52756e-05	1.13991e-05	1.67329e-05	0.000133506	12	26S proteasome non-ATPase regulatory subunit 9 OS=Rattus norvegicus OX=10116 GN=Psmd9 PE=1 SV=1
Hippocampus	Q9R0I8	Pip4k2a	1.9521e-06	4.86224e-06	8.91716e-06	2.14274e-06					1.62805e-05	5.36046e-06	1.1937e-05	5.55957e-06	5.70118e-05	8	Phosphatidylinositol 5-phosphate 4-kinase type-2 alpha OS=Rattus norvegicus OX=10116 GN=Pip4k2a PE=1 SV=1
Hippocampus	Q9EPH8	Pabpc1	9.35881e-05	0.000239298	0.000134966	0.000101312	0.000112901	7.29478e-05	0.000117375	7.46382e-05	0.000104231	5.94593e-05	0.000172518	0.000132064	0.0014153	12	Polyadenylate-binding protein 1 OS=Rattus norvegicus OX=10116 GN=Pabpc1 PE=1 SV=1
Hippocampus	P01026	C3		2.22886e-05	9.67103e-06	9.99724e-06	1.97675e-06	7.70509e-06	3.16592e-06				4.24831e-06	2.60863e-05	8.51393e-05	8	Complement C3 OS=Rattus norvegicus OX=10116 GN=C3 PE=1 SV=3
Hippocampus	O35112	Alcam	9.11399e-06	8.95571e-06			4.8021e-06		2.17375e-05	2.75434e-05	1.79256e-05	2.67414e-06	5.85025e-06	5.01688e-06	0.00010362	9	CD166 antigen OS=Rattus norvegicus OX=10116 GN=Alcam PE=1 SV=1
Hippocampus	O35964	Sh3gl1	0.000179898	4.90615e-05	3.57451e-05	3.37906e-05	4.38115e-05	3.59001e-05	3.90557e-05	3.02235e-05	3.10685e-05	3.98257e-05	3.15419e-05	5.49874e-05	0.00060491	12	Endophilin-A2 OS=Rattus norvegicus OX=10116 GN=Sh3gl1 PE=1 SV=1
Hippocampus	O35179	Sh3gl2	0.00071716	0.000614384	0.000455237	0.000450951	0.000608216	0.000452459	0.000407149	0.000279936	0.000267371	0.00107305	0.000348304	0.000613924	0.00628814	12	Endophilin-A1 OS=Rattus norvegicus OX=10116 GN=Sh3gl2 PE=1 SV=2
Hippocampus	P12007	Ivd	2.60377e-05	6.77742e-05	2.67112e-05	2.74862e-05	7.34632e-05	4.51946e-05	2.90109e-05	2.5296e-05	1.00761e-05	4.32286e-05	5.48712e-05	4.21768e-05	0.000471327	12	Isovaleryl-CoA dehydrogenase, mitochondrial OS=Rattus norvegicus OX=10116 GN=Ivd PE=1 SV=2
Hippocampus	P05708	Hk1	0.000667267	0.000493654	0.000362304	0.000217811	0.000565067	0.000276483	0.000556423	0.000834655	0.000654962	0.000524483	0.000443637	0.000346786	0.00594353	12	Hexokinase-1 OS=Rattus norvegicus OX=10116 GN=Hk1 PE=1 SV=4
Hippocampus	P50503	St13	0.000126419	0.000117189	0.000106475	8.26003e-05	8.93577e-05	7.9742e-05	8.78967e-05	8.02454e-05	0.000143736	0.000122957	0.000108794	0.000166212	0.00131162	12	Hsc70-interacting protein OS=Rattus norvegicus OX=10116 GN=St13 PE=1 SV=1
Hippocampus	P83953	Kpna1	1.41032e-05	4.91743e-06	1.05255e-05	9.85673e-06	7.66507e-06	1.75669e-06	1.29459e-05	1.16834e-05		5.33971e-06	3.05197e-06	1.72142e-05	9.90597e-05	11	Importin subunit alpha-5 OS=Rattus norvegicus OX=10116 GN=Kpna1 PE=1 SV=1
Hippocampus	Q5RKI0	Wdr1	0.000532871	0.000522063	0.00045715	0.000618142	0.000547472	0.000346099	0.0004845	0.00049553	0.000571513	0.000361574	0.000507274	0.000465736	0.00590992	12	WD repeat-containing protein 1 OS=Rattus norvegicus OX=10116 GN=Wdr1 PE=1 SV=3
Hippocampus	P04785	P4hb	6.06427e-05	7.66226e-05	5.91729e-05	5.89741e-05	7.71427e-05	3.82978e-05	5.85889e-05	7.97903e-05	0.000107361	4.59539e-05	3.03561e-05	9.91157e-05	0.000792019	12	Protein disulfide-isomerase OS=Rattus norvegicus OX=10116 GN=P4hb PE=1 SV=2
Hippocampus	B0BNF1	Septin8	2.54412e-05	1.37335e-05	1.46561e-05	3.38383e-06	2.38941e-05	7.45396e-06	7.82409e-05	4.37876e-05	3.37399e-05	1.76152e-05	4.80822e-05	2.6935e-05	0.000336963	12	Septin-8 OS=Rattus norvegicus OX=10116 GN=Septin8 PE=1 SV=1
Hippocampus	Q5U2Z3	Nap1l4	2.65538e-05	3.95957e-05	3.19989e-05	4.82458e-05	3.04347e-05	1.77122e-05	3.35869e-05	2.11207e-05	3.13559e-05	4.4899e-05	1.51067e-05	4.77214e-05	0.000388332	12	Nucleosome assembly protein 1-like 4 OS=Rattus norvegicus OX=10116 GN=Nap1l4 PE=1 SV=1
Hippocampus	O55096	Dpp3	2.19757e-05	1.69565e-05	2.09557e-05	1.1636e-05	2.66007e-05	3.0521e-05	2.02651e-05	6.47399e-06	2.01448e-05	2.66294e-05	1.48517e-05	2.60662e-05	0.000243077	12	Dipeptidyl peptidase 3 OS=Rattus norvegicus OX=10116 GN=Dpp3 PE=1 SV=2
Hippocampus	B5DFN2	Ahcyl1	0.000337606	0.000557145	0.000263238	0.000363899	0.000322373	0.000294492	0.000281761	0.000247321	0.000220596	0.000293326	0.000229897	0.000320706	0.00373236	12	S-adenosylhomocysteine hydrolase-like protein 1 OS=Rattus norvegicus OX=10116 GN=Ahcyl1 PE=1 SV=2
Hippocampus	P63004	Pafah1b1	0.00015139	0.000207231	0.00014027	0.000208588	0.000147242	0.000132028	9.68394e-05	8.3764e-05	0.000120422	9.65374e-05	0.00015734	0.000186983	0.00172863	12	Platelet-activating factor acetylhydrolase IB subunit alpha OS=Rattus norvegicus OX=10116 GN=Pafah1b1 PE=1 SV=2
Hippocampus	P84076	Hpca	0.000318393	0.000301298	7.91331e-05	6.11355e-05	0.000350525	0.000144168	0.000158243	0.000135147	0.000122475	0.000247387	0.000185766	0.000152384	0.00225605	12	Neuron-specific calcium-binding protein hippocalcin OS=Rattus norvegicus OX=10116 GN=Hpca PE=1 SV=2
Hippocampus	P97756	Camkk1	3.00124e-05	2.17449e-05	9.81143e-06	3.77472e-05	3.50258e-05	5.47604e-05	6.78212e-05	6.22291e-05	1.39568e-06	9.73687e-05	1.4986e-05	6.24382e-05	0.000495341	12	Calcium/calmodulin-dependent protein kinase kinase 1 OS=Rattus norvegicus OX=10116 GN=Camkk1 PE=1 SV=1
Hippocampus	P62882	Gnb5	2.65446e-05	2.70272e-05	8.12881e-06	1.33219e-05	1.67576e-05	1.62998e-05	1.29799e-05	1.30053e-05	1.97222e-05	1.13333e-05	1.83544e-05	3.78355e-05	0.000221311	12	Guanine nucleotide-binding protein subunit beta-5 OS=Rattus norvegicus OX=10116 GN=Gnb5 PE=2 SV=1
Hippocampus	P68511	Ywhah	0.000684102	0.000575652	0.000621574	0.000621356	0.000586942	0.000505359	0.000704058	0.000554896	0.00039902	0.000613336	0.000589803	0.000688702	0.0071448	12	14-3-3 protein eta OS=Rattus norvegicus OX=10116 GN=Ywhah PE=1 SV=2
Hippocampus	P30349	Lta4h	2.37776e-05	2.68098e-05	3.64647e-05	3.3842e-05	2.62253e-05	3.72808e-05	2.19747e-05	1.75914e-05	1.51961e-05	2.19729e-05	2.20779e-05	3.40723e-05	0.000317286	12	Leukotriene A-4 hydrolase OS=Rattus norvegicus OX=10116 GN=Lta4h PE=1 SV=3
Hippocampus	P62243	Rps8	7.76762e-05	9.31634e-05	3.29339e-05	5.62845e-05	0.000132868	9.46841e-05	0.000117239	0.00010312	0.000123792	6.54674e-05	7.23511e-05	0.000116533	0.00108611	12	40S ribosomal protein S8 OS=Rattus norvegicus OX=10116 GN=Rps8 PE=1 SV=2
Hippocampus	Q5XIT1	Mapre3	0.000169761	0.000133606	0.000109771	0.000136028	0.000133476	0.000123755	0.000103806	0.00012964	9.41819e-05	8.77603e-05	9.662e-05	0.000140015	0.00145842	12	Microtubule-associated protein RP/EB family member 3 OS=Rattus norvegicus OX=10116 GN=Mapre3 PE=1 SV=1
Hippocampus	P28075	Psmb5	2.21151e-05	2.21195e-05	4.14112e-05	4.12093e-05	4.90381e-05	2.91269e-05	2.83526e-05	3.65826e-05	4.9452e-05	2.10559e-05	3.13515e-05	4.7131e-05	0.000418946	12	Proteasome subunit beta type-5 OS=Rattus norvegicus OX=10116 GN=Psmb5 PE=1 SV=3
Hippocampus	Q6P7S1	Asah1	7.5966e-06	1.39263e-05	1.10222e-05	5.60931e-06	1.7671e-06	7.27516e-06	1.93729e-05	1.6025e-05	6.33206e-06	3.62545e-06	3.85188e-06	2.2783e-05	0.000119187	12	Acid ceramidase OS=Rattus norvegicus OX=10116 GN=Asah1 PE=1 SV=1
Hippocampus	P09527	Rab7a	0.00010407	0.000143141	0.000107508	0.000136698	0.000100571	0.000104958	0.000236543	0.000193301	0.000236482	0.000204961	0.000174068	0.000185486	0.00192779	12	Ras-related protein Rab-7a OS=Rattus norvegicus OX=10116 GN=Rab7a PE=1 SV=2
Hippocampus	Q07266	Dbn1	1.09534e-05	2.04083e-05		2.07633e-05	3.60897e-05	3.66144e-05	2.65995e-05	1.99897e-05	1.95101e-05		1.54269e-05	2.2153e-05	0.000228508	10	Drebrin OS=Rattus norvegicus OX=10116 GN=Dbn1 PE=1 SV=3
Hippocampus	Q5XI73	Arhgdia	0.000342572	0.000330892	0.000351688	0.000334466	0.000374704	0.000348289	0.000247842	0.000283147	0.000307935	0.000350228	0.000279943	0.000338091	0.0038898	12	Rho GDP-dissociation inhibitor 1 OS=Rattus norvegicus OX=10116 GN=Arhgdia PE=1 SV=1
Hippocampus	Q9JJ31	Cul5	1.04958e-05	1.05967e-05	1.20967e-05	1.04105e-05	2.48603e-05	1.07945e-05	8.61322e-06	5.60145e-06	9.18634e-06	6.06031e-06	5.36289e-05	9.50897e-06	0.000171854	12	Cullin-5 OS=Rattus norvegicus OX=10116 GN=Cul5 PE=1 SV=3
Hippocampus	P85972	Vcl	9.0958e-05	8.56409e-05	9.61118e-06	5.6467e-05	3.68637e-05	1.38807e-05	3.25709e-05	5.57464e-05	4.39107e-05	7.53367e-05	1.72424e-05	8.96591e-05	0.000607888	12	Vinculin OS=Rattus norvegicus OX=10116 GN=Vcl PE=1 SV=1
Hippocampus	P62762	Vsnl1	0.000501298	0.000545485	0.00036949	0.000440056	0.000318358	0.000261681	0.000421618	0.000283754	0.000383753	0.000476289	0.000376831	0.00050361	0.00488222	12	Visinin-like protein 1 OS=Rattus norvegicus OX=10116 GN=Vsnl1 PE=1 SV=2
Hippocampus	P38983	Rpsa	0.000117938	0.000139452	6.43376e-05	7.49279e-05	0.000156251	0.000105372	0.000115219	5.54238e-05	0.000127101	8.28841e-05	7.34337e-05	0.000130182	0.00124252	12	40S ribosomal protein SA OS=Rattus norvegicus OX=10116 GN=Rpsa PE=1 SV=3
Hippocampus	P11275	Camk2a	0.00250874	0.00400765	0.00142936	0.00229046	0.00139766	0.00131179	0.00209406	0.0023647	0.00101708	0.00148857	0.000866967	0.00116599	0.021943	12	Calcium/calmodulin-dependent protein kinase type II subunit alpha OS=Rattus norvegicus OX=10116 GN=Camk2a PE=1 SV=1
Hippocampus	P07633	Pccb	4.58104e-06	1.12188e-05	5.6398e-06	7.12287e-06	8.09259e-06	6.19893e-06	2.58008e-06	2.91537e-06	1.23354e-06	5.75281e-06	3.54323e-06	7.69256e-06	6.65716e-05	12	Propionyl-CoA carboxylase beta chain, mitochondrial OS=Rattus norvegicus OX=10116 GN=Pccb PE=2 SV=1
Hippocampus	P24155	Thop1	8.34821e-05	6.76792e-05	8.51321e-05	5.52053e-05	7.79848e-05	6.03957e-05	5.5148e-05	0.00010956	4.7426e-05	4.17995e-05	4.80374e-05	5.97749e-05	0.000791625	12	Thimet oligopeptidase OS=Rattus norvegicus OX=10116 GN=Thop1 PE=1 SV=4
Hippocampus	Q4G061	Eif3b	7.4915e-05	7.45026e-05	1.16573e-05	1.41361e-05	1.62149e-05	5.04398e-05	1.27804e-05	6.93917e-06	5.14565e-05	4.10787e-05	6.20132e-06	8.28114e-05	0.000443133	12	Eukaryotic translation initiation factor 3 subunit B OS=Rattus norvegicus OX=10116 GN=Eif3b PE=1 SV=1
Hippocampus	P54690	Bcat1	9.00218e-05	9.30963e-05	8.72319e-05	9.90449e-05	0.00010006	6.15058e-05	7.82292e-05	8.81649e-05	0.000132224	6.62253e-05	6.45226e-05	0.000113488	0.00107382	12	Branched-chain-amino-acid aminotransferase, cytosolic OS=Rattus norvegicus OX=10116 GN=Bcat1 PE=1 SV=1
Hippocampus	P13676	Apeh	8.02789e-06	8.14632e-06	5.50645e-06	3.25821e-06	4.64533e-06	8.44332e-06	1.16585e-06	2.31095e-06		5.19781e-06	4.81419e-06	7.79555e-06	5.93119e-05	11	Acylamino-acid-releasing enzyme OS=Rattus norvegicus OX=10116 GN=Apeh PE=1 SV=1
Hippocampus	P62749	Hpcal1	9.34417e-06			1.79367e-05		1.34659e-06	5.00668e-05	1.02872e-05	5.69631e-05	8.21675e-06	9.65664e-06	1.22958e-05	0.000176114	9	Hippocalcin-like protein 1 OS=Rattus norvegicus OX=10116 GN=Hpcal1 PE=1 SV=2
Hippocampus	P19627	Gnaz	5.65423e-06	1.85177e-05			1.6723e-05	2.32978e-06	4.49931e-05	2.2602e-05	1.31912e-05	2.1137e-05	9.53616e-06	3.78348e-06	0.000158468	10	Guanine nucleotide-binding protein G(z) subunit alpha OS=Rattus norvegicus OX=10116 GN=Gnaz PE=2 SV=3
Hippocampus	P62632	Eef1a2	0.000209052	0.000189697	0.00016623	0.000444497	0.000179541	0.000141783	0.000213695	0.000319731	0.000183269	0.000150057	0.00011944	0.00038027	0.00269726	12	Elongation factor 1-alpha 2 OS=Rattus norvegicus OX=10116 GN=Eef1a2 PE=1 SV=1
Hippocampus	Q09073	Slc25a5	6.01652e-05	1.81897e-05			2.23917e-05		7.72053e-05	0.000184178	0.000304984	9.19083e-05	0.00038363	8.24624e-06	0.0011509	9	ADP/ATP translocase 2 OS=Rattus norvegicus OX=10116 GN=Slc25a5 PE=1 SV=3
Hippocampus	Q7TP47	Syncrip	0.000115026	0.000134104	8.29715e-05	8.13175e-05	8.98258e-05	9.63825e-05	0.000144844	8.3336e-05	0.000114586	0.000141594	5.05303e-05	0.000101025	0.00123554	12	Heterogeneous nuclear ribonucleoprotein Q OS=Rattus norvegicus OX=10116 GN=Syncrip PE=2 SV=1
Hippocampus	Q62698	Dync1li2	1.33628e-05	2.17475e-05	2.31574e-05	1.96101e-05	1.78676e-05	2.2181e-05	2.14194e-05	1.68532e-05	1.94653e-05	2.40503e-05	1.721e-05	3.57396e-05	0.000252664	12	Cytoplasmic dynein 1 light intermediate chain 2 OS=Rattus norvegicus OX=10116 GN=Dync1li2 PE=1 SV=1
Hippocampus	Q99MS0	Sec14l2	4.84388e-05	4.44738e-05	3.16905e-05	3.89143e-05	5.80087e-05	3.63602e-05	2.30355e-05	2.4546e-05	1.91902e-05	4.77017e-05	2.03302e-05	4.51968e-05	0.000437887	12	SEC14-like protein 2 OS=Rattus norvegicus OX=10116 GN=Sec14l2 PE=1 SV=1
Hippocampus	Q66HL2	Cttn	0.00014818	0.000118159	0.000105434	8.37859e-05	0.000172621	0.000153235	0.00010033	9.1447e-05	7.85748e-05	0.000166869	8.22939e-05	8.41577e-05	0.00138509	12	Src substrate cortactin OS=Rattus norvegicus OX=10116 GN=Cttn PE=1 SV=1
Hippocampus	Q63610	Tpm3	8.98697e-05	3.96758e-05	2.82428e-05	3.31886e-05	4.67304e-05	2.54165e-05	2.48019e-05	2.20881e-05	9.51513e-06	4.87361e-05	2.24196e-05	4.2536e-05	0.000433221	12	Tropomyosin alpha-3 chain OS=Rattus norvegicus OX=10116 GN=Tpm3 PE=1 SV=2
Hippocampus	Q6P502	Cct3	0.000288084	0.000341249	0.000273207	0.000330835	0.000390076	0.000223187	0.000259876	0.000393189	0.000324033	0.000356713	0.000234613	0.00051143	0.00392649	12	T-complex protein 1 subunit gamma OS=Rattus norvegicus OX=10116 GN=Cct3 PE=1 SV=1
Hippocampus	Q566R0	Them4	1.27077e-05	1.05776e-05	9.87585e-06	6.34615e-06	1.41736e-05	4.65928e-06	1.36023e-05	6.47398e-06	1.09171e-05		3.60757e-06	1.12909e-05	0.000104232	11	Acyl-coenzyme A thioesterase THEM4 OS=Rattus norvegicus OX=10116 GN=Them4 PE=2 SV=1
Hippocampus	B0BNE5	Esd	8.67272e-05	7.23011e-05	8.18601e-05	7.83208e-05	0.000102908	0.000104679	5.82258e-05	6.79683e-05	5.40084e-05	9.10398e-05	8.37556e-05	6.26998e-05	0.000944494	12	S-formylglutathione hydrolase OS=Rattus norvegicus OX=10116 GN=Esd PE=2 SV=1
Hippocampus	Q9EPC6	Pfn2	0.000194562	0.000191044	0.000389092	0.000288437	0.000207842	0.000314123	0.000354089	0.000232091	0.000225511	0.000447454	0.000349921	0.000243294	0.00343746	12	Profilin-2 OS=Rattus norvegicus OX=10116 GN=Pfn2 PE=1 SV=3
Hippocampus	A8WCF8	Tprg1l	3.43686e-05	2.5991e-05	1.38939e-05	1.90657e-05	2.99072e-05	3.89258e-05	7.41535e-05	6.1321e-05	2.35887e-05	1.27226e-05	2.48806e-05	2.63057e-05	0.000385124	12	Tumor protein p63-regulated gene 1-like protein OS=Rattus norvegicus OX=10116 GN=Tprg1l PE=1 SV=1
Hippocampus	P01041	Cstb	9.31856e-05	5.72692e-05	8.98669e-05	7.25074e-05	7.51749e-05	7.93391e-05	4.19388e-05	6.60347e-05	7.24128e-05	4.27622e-05	5.99188e-05	7.13966e-05	0.000821807	12	Cystatin-B OS=Rattus norvegicus OX=10116 GN=Cstb PE=1 SV=1
Hippocampus	Q6AYT5	Armt1	5.16958e-06	5.95057e-06	5.92091e-06	9.1359e-06	6.72985e-06	2.25385e-06	2.44659e-06			3.88723e-06	1.75367e-06	6.05661e-06	4.93048e-05	10	Damage-control phosphatase ARMT1 OS=Rattus norvegicus OX=10116 GN=Armt1 PE=1 SV=1
Hippocampus	P31016	Dlg4	2.70688e-05	2.76063e-05	2.76149e-05	1.49911e-05	7.72197e-06	2.03726e-05	2.24126e-05	5.20586e-05	2.93564e-05	6.94185e-05	3.96775e-05	2.60808e-05	0.00036438	12	Disks large homolog 4 OS=Rattus norvegicus OX=10116 GN=Dlg4 PE=1 SV=1
Hippocampus	P69682	Necap1	0.000106558	0.000170008	8.26009e-05	0.000131437	8.76551e-05	0.000124391	0.000188488	0.00014389	8.26918e-05	4.05945e-05	0.000114004	0.000114948	0.00138727	12	Adaptin ear-binding coat-associated protein 1 OS=Rattus norvegicus OX=10116 GN=Necap1 PE=1 SV=1
Hippocampus	P21913	Sdhb	3.03791e-05	3.05361e-06			2.50226e-05		1.119e-05	1.34783e-05	1.70873e-05	6.8035e-06	1.03893e-05	1.43894e-05	0.000131793	9	Succinate dehydrogenase [ubiquinone] iron-sulfur subunit, mitochondrial OS=Rattus norvegicus OX=10116 GN=Sdhb PE=2 SV=2
Hippocampus	P20717	Padi2	9.70783e-06	1.3812e-05	1.92202e-05	2.00224e-05	1.1746e-05	1.84308e-05	1.25024e-05	4.41043e-06		2.41062e-05	8.19005e-06	1.65219e-05	0.00015867	11	Protein-arginine deiminase type-2 OS=Rattus norvegicus OX=10116 GN=Padi2 PE=1 SV=1
Hippocampus	P51583	Paics		6.92795e-06	7.7714e-06	1.12783e-05	1.71769e-05	4.59254e-06	1.05591e-05	8.92213e-06	1.34366e-05	1.26745e-05	8.00254e-06	9.10766e-06	0.00011045	11	Multifunctional protein ADE2 OS=Rattus norvegicus OX=10116 GN=Paics PE=1 SV=3
Hippocampus	P10824	Gnai1	2.26904e-05	2.8591e-05	1.31653e-05	2.53644e-05	1.96242e-05	1.12468e-05	5.87283e-05	6.14201e-05	5.05682e-05	5.49838e-05	4.36859e-05	2.85432e-05	0.000418612	12	Guanine nucleotide-binding protein G(i) subunit alpha-1 OS=Rattus norvegicus OX=10116 GN=Gnai1 PE=1 SV=3
Hippocampus	O55156	Clip2	7.95841e-06	1.00344e-05	7.53689e-06	7.19723e-06	9.06067e-06	7.15241e-06	1.24714e-05	4.26355e-06	1.35225e-05	9.91405e-06	3.11203e-06	1.20963e-05	0.00010432	12	CAP-Gly domain-containing linker protein 2 OS=Rattus norvegicus OX=10116 GN=Clip2 PE=1 SV=1
Hippocampus	Q6AXT5	Rab21	1.6222e-05	1.25157e-05	2.44164e-05	3.07861e-05	3.59072e-06	1.80266e-05	2.84189e-05	2.89358e-05	3.03674e-05	1.04736e-05	2.99562e-05	1.54978e-05	0.000249207	12	Ras-related protein Rab-21 OS=Rattus norvegicus OX=10116 GN=Rab21 PE=2 SV=1
Hippocampus	F1LQ48	Hnrnpl	1.52587e-05	2.21045e-05	1.74167e-05	1.8715e-05	2.94968e-05	3.54772e-05	2.91607e-05	2.15655e-05	3.05463e-05	2.11681e-05	7.38776e-06	2.56341e-05	0.000273931	12	Heterogeneous nuclear ribonucleoprotein L OS=Rattus norvegicus OX=10116 GN=Hnrnpl PE=1 SV=2
Hippocampus	P18265	Gsk3a	3.38864e-05	3.87922e-05	2.77409e-05	2.17735e-05	3.58172e-05	2.48165e-05	2.88378e-05	2.45128e-05	3.2559e-05	4.84077e-05	3.88179e-05	2.73448e-05	0.000383307	12	Glycogen synthase kinase-3 alpha OS=Rattus norvegicus OX=10116 GN=Gsk3a PE=1 SV=1
Hippocampus	Q920Q0	Palm	5.36813e-05	3.481e-05	2.28659e-05	3.83125e-05	5.43699e-05	5.21153e-05	0.000159961	0.000157995	0.000145201	7.2905e-05	0.000117526	5.6011e-05	0.000965754	12	Paralemmin-1 OS=Rattus norvegicus OX=10116 GN=Palm PE=1 SV=1
Hippocampus	P55053	Fabp5	0.000212814	0.000153522	0.000143261	0.000186936	0.000132185	0.000159415	0.000216975	0.000241909	0.000355165	0.000113993	0.000175648	0.000246764	0.00233859	12	Fatty acid-binding protein 5 OS=Rattus norvegicus OX=10116 GN=Fabp5 PE=1 SV=3
Hippocampus	B5DF91	Elavl1	2.09311e-05	1.78148e-05	1.78952e-05	1.01938e-05	1.02412e-05	1.39417e-05	3.52046e-05	2.15397e-05	2.48556e-05		8.98187e-06	3.18833e-05	0.000213483	11	ELAV-like protein 1 OS=Rattus norvegicus OX=10116 GN=Elavl1 PE=1 SV=1
Hippocampus	Q62639	Rheb	2.71814e-05	2.78084e-05	1.21423e-05	2.26348e-05	1.22972e-05	1.261e-05	1.24461e-05	2.05276e-05	2.26175e-05	1.20017e-05	7.95536e-06	1.34229e-05	0.000203645	12	GTP-binding protein Rheb OS=Rattus norvegicus OX=10116 GN=Rheb PE=1 SV=1
Hippocampus	P13697	Me1	0.000229133	0.000119518	0.000160614	0.00014558	9.76938e-05	6.7226e-05	8.02182e-05	0.000116629	0.00010807	5.77448e-05	8.22417e-05	0.000149619	0.00141429	12	NADP-dependent malic enzyme OS=Rattus norvegicus OX=10116 GN=Me1 PE=1 SV=2
Hippocampus	Q68FX9	Sirt5	1.3793e-05	2.21272e-05	1.75258e-05	1.07523e-05	1.10517e-05	8.84764e-06	1.42327e-05	1.00233e-05	9.3678e-06	4.75461e-06	8.38457e-06	1.72275e-05	0.000148088	12	NAD-dependent protein deacylase sirtuin-5, mitochondrial OS=Rattus norvegicus OX=10116 GN=Sirt5 PE=2 SV=1
Hippocampus	Q63041	A1m	4.47738e-06	8.45815e-06	3.03247e-05	1.93873e-05	4.14636e-05	3.25498e-05	2.08234e-05	1.4933e-05	9.62187e-05	5.8204e-06	2.33135e-05	4.77329e-06	0.000302543	12	Alpha-1-macroglobulin OS=Rattus norvegicus OX=10116 GN=A1m PE=1 SV=1
Hippocampus	O08651	Phgdh	8.19276e-05	8.74394e-05	0.000164023	0.000101123	0.000183392	0.000241882	7.37047e-05	8.21955e-05	3.60023e-05	0.000140331	9.15223e-05	9.44616e-05	0.001378	12	D-3-phosphoglycerate dehydrogenase OS=Rattus norvegicus OX=10116 GN=Phgdh PE=1 SV=3
Hippocampus	Q5QJC9	Bag5	3.75426e-06	3.88557e-06	1.93137e-06	2.21897e-06	2.24654e-06		2.95128e-06	1.21792e-06	1.56666e-06	2.91864e-06	1.66061e-06	8.08179e-07	2.516e-05	11	BAG family molecular chaperone regulator 5 OS=Rattus norvegicus OX=10116 GN=Bag5 PE=1 SV=1
Hippocampus	P09951	Syn1	1.1386e-05			1.20878e-05		1.6667e-05	1.27835e-05			1.91773e-05	1.38931e-05		8.59946e-05	6	Synapsin-1 OS=Rattus norvegicus OX=10116 GN=Syn1 PE=1 SV=3
Hippocampus	P22062	Pcmt1	0.000155409	0.000144042	0.000114067	0.000118195	0.000161276	0.000132547	9.95105e-05	9.89813e-05	0.000139383	0.000114549	0.000109134	0.000175045	0.00156214	12	Protein-L-isoaspartate(D-aspartate) O-methyltransferase OS=Rattus norvegicus OX=10116 GN=Pcmt1 PE=1 SV=2
Hippocampus	P52555	Erp29	0.000282201	0.000393741	4.00544e-05	0.000414117	4.92444e-05	3.42798e-05	6.16572e-05	5.64048e-05	5.40093e-05	6.65939e-05	5.11076e-05	5.32724e-05	0.00155668	12	Endoplasmic reticulum resident protein 29 OS=Rattus norvegicus OX=10116 GN=Erp29 PE=1 SV=2
Hippocampus	P04762	Cat	1.53219e-06	9.83499e-06	1.88435e-06	9.20093e-06	7.4484e-06	1.53383e-06			8.49139e-06	2.04097e-06	5.29349e-06	6.8041e-06	5.40646e-05	10	Catalase OS=Rattus norvegicus OX=10116 GN=Cat PE=1 SV=3
Hippocampus	P25093	Fah	1.46448e-05	1.36545e-05	2.04569e-05	4.90267e-06	2.88939e-05	2.19014e-05	4.65563e-06	9.26095e-06		1.9423e-05	2.31676e-05	2.00553e-05	0.000181017	11	Fumarylacetoacetase OS=Rattus norvegicus OX=10116 GN=Fah PE=1 SV=1
Hippocampus	P29411	Ak3	4.99757e-05	4.56652e-06	9.70419e-05	0.00013239	4.62798e-05	2.40893e-05	1.72349e-05	0.000100948		6.23873e-06	0.000126992	8.14559e-05	0.000687213	11	GTP:AMP phosphotransferase AK3, mitochondrial OS=Rattus norvegicus OX=10116 GN=Ak3 PE=2 SV=2
Hippocampus	Q5XII0	Epdr1	2.69222e-05	1.92552e-05	2.96903e-05	3.36223e-05	1.83886e-05	1.99033e-05	3.16694e-05	5.51403e-05	2.2451e-05	7.26035e-06	1.32319e-05	2.12676e-05	0.000298802	12	Mammalian ependymin-related protein 1 OS=Rattus norvegicus OX=10116 GN=Epdr1 PE=1 SV=1
Hippocampus	Q9Z0W7	Clic4	8.92198e-07		2.15585e-06	3.49147e-06	6.39232e-06	3.09889e-06	6.26813e-06	2.91991e-06		4.22848e-06	3.67569e-06	2.93139e-06	3.60543e-05	10	Chloride intracellular channel protein 4 OS=Rattus norvegicus OX=10116 GN=Clic4 PE=1 SV=3
Hippocampus	O08773	Rgs14	4.05729e-06	7.48088e-06	5.4732e-06	2.1818e-06	8.6217e-06	4.99886e-06		5.91284e-06	2.64288e-06	7.88669e-06	6.05406e-06	2.11751e-06	5.74277e-05	11	Regulator of G-protein signaling 14 OS=Rattus norvegicus OX=10116 GN=Rgs14 PE=1 SV=1
Hippocampus	P62853	Rps25	4.39161e-05	8.61417e-05	0.000343359	5.39139e-05	0.000602726	6.65155e-05	0.000101158	0.000253561	0.000343132	6.79494e-05	4.01704e-05	0.000333628	0.00233617	12	40S ribosomal protein S25 OS=Rattus norvegicus OX=10116 GN=Rps25 PE=2 SV=1
Hippocampus	P15178	Dars1	2.0889e-05	2.27686e-05	3.39098e-05	3.77951e-05	4.97099e-05	3.1814e-05	4.51879e-05	3.94217e-05	5.72166e-05	3.4372e-05	3.95594e-05	3.10664e-05	0.00044371	12	Aspartate--tRNA ligase, cytoplasmic OS=Rattus norvegicus OX=10116 GN=Dars1 PE=1 SV=1
Hippocampus	Q6AXQ0	Sae1	6.37697e-06	3.86948e-06	7.06678e-06	7.54567e-06	2.73297e-06	6.46106e-06	5.73042e-06	2.72162e-06	3.84923e-06	8.4116e-06	2.04496e-06	8.549e-06	6.53598e-05	12	SUMO-activating enzyme subunit 1 OS=Rattus norvegicus OX=10116 GN=Sae1 PE=2 SV=1
Hippocampus	P47198	Rpl22	6.77154e-05	7.86182e-05	5.39597e-05	4.29886e-05	5.21145e-05	4.15329e-05	5.97556e-05	4.47789e-05	4.23579e-05	2.83824e-05	5.11854e-05	4.93392e-05	0.000612729	12	60S ribosomal protein L22 OS=Rattus norvegicus OX=10116 GN=Rpl22 PE=2 SV=2
Hippocampus	P34064	Psma5	7.45006e-05	0.000114391	9.22729e-05	8.88186e-05	6.88474e-05	6.93446e-05	5.55493e-05	4.78223e-05	7.16172e-05	7.15047e-05	6.24196e-05	0.000108025	0.000925112	12	Proteasome subunit alpha type-5 OS=Rattus norvegicus OX=10116 GN=Psma5 PE=1 SV=1
Hippocampus	P20059	Hpx	1.98558e-06	9.55685e-06	1.74645e-05	1.50463e-05	5.48735e-06	1.155e-05	9.52033e-06	4.57707e-06	6.71222e-06	4.60918e-06	1.89717e-05	1.29286e-05	0.00011841	12	Hemopexin OS=Rattus norvegicus OX=10116 GN=Hpx PE=1 SV=3
Hippocampus	F1M0Z1	Trio	3.76465e-06	5.11132e-06	2.53467e-05	6.40979e-06	2.24015e-06	3.76373e-06	6.73362e-06	6.13904e-06	4.46917e-06	4.07538e-06	3.38413e-05	4.49068e-06	0.000106386	12	Triple functional domain protein OS=Rattus norvegicus OX=10116 GN=Trio PE=1 SV=4
Hippocampus	P36201	Crip2	9.70588e-07	1.72347e-06	4.30723e-06	6.64954e-06	5.27192e-06	4.31449e-06	5.61169e-06	3.3346e-06	1.33922e-05	4.35521e-06	7.14814e-06	3.64661e-05	9.35452e-05	12	Cysteine-rich protein 2 OS=Rattus norvegicus OX=10116 GN=Crip2 PE=2 SV=1
Hippocampus	P61589	Rhoa	0.000150876	0.000121746	0.00011243	7.41074e-05	0.000145513	0.000115482	0.000146998	0.000109839	6.40415e-05	0.000103021	0.000127416	0.000167469	0.00143894	12	Transforming protein RhoA OS=Rattus norvegicus OX=10116 GN=Rhoa PE=1 SV=1
Hippocampus	Q497B0	Nit2	3.29261e-05	1.82274e-05	6.24646e-06	9.66081e-06	3.2249e-06	4.95289e-06	3.22456e-06	8.79013e-06	9.74587e-06	1.21931e-05	2.84993e-05	2.39327e-05	0.000161624	12	Omega-amidase NIT2 OS=Rattus norvegicus OX=10116 GN=Nit2 PE=1 SV=1
Hippocampus	P0C2X9	Aldh4a1	1.28872e-06	1.84132e-06		1.66063e-06		2.14158e-06	1.05326e-05		8.78937e-07	5.20103e-06	5.06912e-06	7.87435e-06	3.64883e-05	9	Delta-1-pyrroline-5-carboxylate dehydrogenase, mitochondrial OS=Rattus norvegicus OX=10116 GN=Aldh4a1 PE=1 SV=1
Hippocampus	P62483	Kcnab2	3.10878e-05	3.00273e-05	5.50847e-06	4.64629e-06	3.68076e-05	1.10737e-05	5.14601e-05	3.58659e-05	1.71501e-05	3.26705e-05	1.22595e-05	7.39988e-06	0.000275957	12	Voltage-gated potassium channel subunit beta-2 OS=Rattus norvegicus OX=10116 GN=Kcnab2 PE=1 SV=1
Hippocampus	P43138	Apex1	8.83475e-06	3.9602e-06	6.1419e-06	6.8427e-06	2.73516e-06	4.89432e-06	8.85358e-06	6.43625e-06	0.000480027	6.73001e-06	6.52204e-06	2.27127e-05	0.000564691	12	DNA-(apurinic or apyrimidinic site) endonuclease OS=Rattus norvegicus OX=10116 GN=Apex1 PE=1 SV=2
Hippocampus	P63326	Rps10	3.00894e-05	3.56611e-05	4.95299e-05	5.90926e-05	4.14922e-05	3.02995e-05	7.22024e-05	4.70116e-05	5.65005e-05	3.426e-05	4.26661e-05	6.73341e-05	0.000566139	12	40S ribosomal protein S10 OS=Rattus norvegicus OX=10116 GN=Rps10 PE=2 SV=1
Hippocampus	P25113	Pgam1	0.000987663	0.000909878	0.000926624	0.000809831	0.000910459	0.000921125	0.000440369	0.000739897	0.000720328	0.00118717	0.000749372	0.00104294	0.0103457	12	Phosphoglycerate mutase 1 OS=Rattus norvegicus OX=10116 GN=Pgam1 PE=1 SV=4
Hippocampus	P47967	Lgals5		2.80054e-06	8.22094e-06	3.36183e-06		4.51268e-06			5.51624e-06		3.78419e-06	1.23847e-06	2.94349e-05	7	Galectin-5 OS=Rattus norvegicus OX=10116 GN=Lgals5 PE=1 SV=2
Hippocampus	P35434	Atp5f1d	2.96451e-05	2.49518e-05	7.04167e-06	3.75877e-06	3.30991e-05	1.21697e-05	5.97328e-05	0.000106325	7.14042e-05	4.18589e-05	6.21922e-05	1.49667e-05	0.000467146	12	ATP synthase subunit delta, mitochondrial OS=Rattus norvegicus OX=10116 GN=Atp5f1d PE=1 SV=2
Hippocampus	P19103	Ppp1r1a	7.74368e-06	1.55331e-05	3.97607e-06	6.15237e-06	1.91773e-05	9.2221e-06	3.73713e-06	1.0861e-05	1.15454e-05	7.52154e-06	9.14988e-06	1.86179e-05	0.000123237	12	Protein phosphatase 1 regulatory subunit 1A OS=Rattus norvegicus OX=10116 GN=Ppp1r1a PE=1 SV=1
Hippocampus	O88767	Park7	0.000492496	0.000473758	0.000494996	0.000374405	0.000514524	0.000341358	0.000286926	0.000261413	0.000295052	0.000502015	0.000283742	0.000428346	0.00474903	12	Parkinson disease protein 7 homolog OS=Rattus norvegicus OX=10116 GN=Park7 PE=1 SV=1
Hippocampus	Q5XI22	Acat2	3.97748e-05	4.70198e-05	4.45616e-05	4.6197e-05	3.89038e-05	4.9921e-05	1.5534e-05	3.28462e-05	6.84738e-05	5.80725e-05	2.29266e-05	2.51595e-05	0.000489391	12	Acetyl-CoA acetyltransferase, cytosolic OS=Rattus norvegicus OX=10116 GN=Acat2 PE=1 SV=1
Hippocampus	Q68A21	Purb	9.92474e-05	0.000129989	8.71189e-05	0.000115743	0.000107357	6.83816e-05	9.22431e-05	8.97437e-05	0.000102799	9.86688e-05	6.90013e-05	0.000101234	0.00116153	12	Transcriptional activator protein Pur-beta OS=Rattus norvegicus OX=10116 GN=Purb PE=1 SV=3
Hippocampus	Q5FVC2	Arhgef2	1.44093e-05	7.57448e-06	1.22807e-05	2.51826e-06	1.18547e-05	4.56241e-06	1.5898e-05	1.87509e-05	8.58396e-06	7.30973e-06	1.37692e-05	6.85684e-06	0.000124369	12	Rho guanine nucleotide exchange factor 2 OS=Rattus norvegicus OX=10116 GN=Arhgef2 PE=1 SV=1
Hippocampus	P97710	Sirpa	3.48439e-05	2.88616e-05	3.14493e-06	9.26648e-06	3.23622e-05	1.58126e-05	7.20984e-05	3.92982e-05	4.09688e-05	3.38805e-05	4.45418e-05	2.67535e-05	0.000381833	12	Tyrosine-protein phosphatase non-receptor type substrate 1 OS=Rattus norvegicus OX=10116 GN=Sirpa PE=1 SV=1
Hippocampus	P62912	Rpl32	2.38165e-05	3.83062e-05	4.91943e-06	1.83791e-05	4.21863e-05	1.80891e-05	3.70275e-05	1.65134e-05	2.5872e-05	9.21379e-06	7.58612e-06	3.5265e-05	0.000277175	12	60S ribosomal protein L32 OS=Rattus norvegicus OX=10116 GN=Rpl32 PE=1 SV=2
[truncated: 573 more rows]

## Sheet: Planilha1
Supplementary Table S3. Protein quantification (normalized XIC) in the prefrontal cortex and hippocampus proteomes of the streptozotocin rat model and control (wild-type)
[truncated: 37 more rows]
