# Supplementary material for: Proteomic Analysis of a Rat Streptozotocin Model Shows Dysregulated Biological Pathways Implicated in Alzheimer’s Disease
Source: Int J Mol Sci. 2024 Feb 28;25(5):2772. doi: 10.3390/ijms25052772 (PMC10931650; doi:10.3390/ijms25052772)
Supplement: Supplementary file 1 [file ijms-25-02772-s001.zip › Table S4.xlsx]

## Sheet: S4
Supplementary Table S4. Fold change of proteins in the prefrontal cortex and hippocampus proteomes of the streptozotocin rat model and control (wild-type)
Dataset	Locus	Gene	Description	Color	P.value	Diff.expressed	Log2FoldChange
Pre-frontal cortex	O35077	Gpd1	Glycerol-3-phosphate dehydrogenase [NAD(+)], cytoplasmic OS=Rattus norvegicus OX=10116 GN=Gpd1 PE=1 SV=4	Blue	0.03353	Up	3.32193
Pre-frontal cortex	P31000	Vim	Vimentin OS=Rattus norvegicus OX=10116 GN=Vim PE=1 SV=2	Blue	0.03382	Up	2.8365
Pre-frontal cortex	Q63416	Itih3	Inter-alpha-trypsin inhibitor heavy chain H3 OS=Rattus norvegicus OX=10116 GN=Itih3 PE=2 SV=1	Blue	0.03609	Up	2
Pre-frontal cortex	P53042	Ppp5c	Serine/threonine-protein phosphatase 5 OS=Rattus norvegicus OX=10116 GN=Ppp5c PE=1 SV=1	Blue	0.00286	Up	1.8365
Pre-frontal cortex	P24049	Rpl17	60S ribosomal protein L17 OS=Rattus norvegicus OX=10116 GN=Rpl17 PE=2 SV=3	Blue	0.00522	Up	1.73697
Pre-frontal cortex	P35745	Acyp2	Acylphosphatase-2 OS=Rattus norvegicus OX=10116 GN=Acyp2 PE=1 SV=2	Orange	0.00029		-0.871844
Pre-frontal cortex	P20280	Rpl21	60S ribosomal protein L21 OS=Rattus norvegicus OX=10116 GN=Rpl21 PE=1 SV=3	Orange	0.0003		1.47393
Pre-frontal cortex	D3ZQD3	Ogdhl	2-oxoglutarate dehydrogenase-like, mitochondrial OS=Rattus norvegicus OX=10116 GN=Ogdhl PE=1 SV=2	Blue	0.03848	Up	1.55639
Pre-frontal cortex	Q63525	Nudc	Nuclear migration protein nudC OS=Rattus norvegicus OX=10116 GN=Nudc PE=1 SV=1	Blue	0.00837	Up	1.51457
Pre-frontal cortex	Q6AYT5	Armt1	Damage-control phosphatase ARMT1 OS=Rattus norvegicus OX=10116 GN=Armt1 PE=1 SV=1	Orange	0.00047		-1.85599
Pre-frontal cortex	O35180	Sh3gl3	Endophilin-A3 OS=Rattus norvegicus OX=10116 GN=Sh3gl3 PE=1 SV=2	Orange	0.00047		1.55639
Pre-frontal cortex	Q4FZY0	Efhd2	EF-hand domain-containing protein D2 OS=Rattus norvegicus OX=10116 GN=Efhd2 PE=1 SV=1	Blue	0.02983	Up	1.4344
Pre-frontal cortex	Q62698	Dync1li2	Cytoplasmic dynein 1 light intermediate chain 2 OS=Rattus norvegicus OX=10116 GN=Dync1li2 PE=1 SV=1	Orange	0.0005		0.666576
Pre-frontal cortex	P46844	Blvra	Biliverdin reductase A OS=Rattus norvegicus OX=10116 GN=Blvra PE=1 SV=1	Blue	0.00295	Up	1.32193
Pre-frontal cortex	P14841	Cst3	Cystatin-C OS=Rattus norvegicus OX=10116 GN=Cst3 PE=1 SV=2	Blue	1e-05	Up	1.2863
Pre-frontal cortex	Q5RJQ4	Sirt2	NAD-dependent protein deacetylase sirtuin-2 OS=Rattus norvegicus OX=10116 GN=Sirt2 PE=1 SV=1	Blue	8e-05	Up	1.2863
Pre-frontal cortex	P55051	Fabp7	Fatty acid-binding protein, brain OS=Rattus norvegicus OX=10116 GN=Fabp7 PE=1 SV=2	Blue	0.00026	Up	1.2863
Pre-frontal cortex	Q63610-2	Tpm3	Isoform 2 of Tropomyosin alpha-3 chain OS=Rattus norvegicus OX=10116 GN=Tpm3	Orange	0.00094		1.02915
Pre-frontal cortex	P47875	Csrp1	Cysteine and glycine-rich protein 1 OS=Rattus norvegicus OX=10116 GN=Csrp1 PE=1 SV=2	Blue	0.00075	Up	1.25154
Pre-frontal cortex	Q99PF5	Khsrp	Far upstream element-binding protein 2 OS=Rattus norvegicus OX=10116 GN=Khsrp PE=1 SV=1	Blue	0.00055	Up	1.152
Pre-frontal cortex	Q9ER24	Atxn10	Ataxin-10 OS=Rattus norvegicus OX=10116 GN=Atxn10 PE=1 SV=1	Orange	0.00112		1.68966
Pre-frontal cortex	P13233	Cnp	2',3'-cyclic-nucleotide 3'-phosphodiesterase OS=Rattus norvegicus OX=10116 GN=Cnp PE=1 SV=2	Blue	0.00225	Up	1.12029
Pre-frontal cortex	P23514	Copb1	Coatomer subunit beta OS=Rattus norvegicus OX=10116 GN=Copb1 PE=1 SV=1	Orange	0.00129		1.12029
Pre-frontal cortex	Q5QJC9	Bag5	BAG family molecular chaperone regulator 5 OS=Rattus norvegicus OX=10116 GN=Bag5 PE=1 SV=1	Orange	0.00129		1.94342
Pre-frontal cortex	P15087	Cpe	Carboxypeptidase E OS=Rattus norvegicus OX=10116 GN=Cpe PE=1 SV=1	Blue	0.00048	Up	1.05889
Pre-frontal cortex	P02650	Apoe	Apolipoprotein E OS=Rattus norvegicus OX=10116 GN=Apoe PE=1 SV=2	Blue	0.00064	Up	1.05889
Pre-frontal cortex	P55053	Fabp5	Fatty acid-binding protein 5 OS=Rattus norvegicus OX=10116 GN=Fabp5 PE=1 SV=3	Blue	0.00137	Up	1.02915
Pre-frontal cortex	Q5BJR4	Prune2	Protein prune homolog 2 OS=Rattus norvegicus OX=10116 GN=Prune2 PE=1 SV=1	Orange	0.00171		1
Pre-frontal cortex	B0BNF1	Septin8	Septin-8 OS=Rattus norvegicus OX=10116 GN=Septin8 PE=1 SV=1	Blue	0.00612	Up	1.02915
Pre-frontal cortex	Q05683	Gad2	Glutamate decarboxylase 2 OS=Rattus norvegicus OX=10116 GN=Gad2 PE=1 SV=1	Blue	0.00607	Up	1
Pre-frontal cortex	P11348	Qdpr	Dihydropteridine reductase OS=Rattus norvegicus OX=10116 GN=Qdpr PE=1 SV=1	Blue	0.01758	Up	0.943416
Pre-frontal cortex	B0BNA7	Eif3i	Eukaryotic translation initiation factor 3 subunit I OS=Rattus norvegicus OX=10116 GN=Eif3i PE=2 SV=1	Orange	0.00194		1.88897
Pre-frontal cortex	Q9QXU9	Pcsk1n	ProSAAS OS=Rattus norvegicus OX=10116 GN=Pcsk1n PE=1 SV=1	Blue	0.00169	Up	0.915936
Pre-frontal cortex	P52296	Kpnb1	Importin subunit beta-1 OS=Rattus norvegicus OX=10116 GN=Kpnb1 PE=1 SV=1	Blue	0.00228	Up	0.915936
Pre-frontal cortex	P20156	Vgf	Neurosecretory protein VGF OS=Rattus norvegicus OX=10116 GN=Vgf PE=1 SV=3	Orange	0.00251		1.73697
Pre-frontal cortex	Q80Z30	Ppm1e	Protein phosphatase 1E OS=Rattus norvegicus OX=10116 GN=Ppm1e PE=1 SV=1	Blue	0.00553	Up	0.915936
Pre-frontal cortex	P62425	Rpl7a	60S ribosomal protein L7a OS=Rattus norvegicus OX=10116 GN=Rpl7a PE=1 SV=2	Blue	0.00559	Up	0.888969
Pre-frontal cortex	P68101	Eif2s1	Eukaryotic translation initiation factor 2 subunit 1 OS=Rattus norvegicus OX=10116 GN=Eif2s1 PE=1 SV=2	Orange	0.00281		1.08927
Pre-frontal cortex	Q66HR2	Mapre1	Microtubule-associated protein RP/EB family member 1 OS=Rattus norvegicus OX=10116 GN=Mapre1 PE=1 SV=3	Orange	0.00282		0.577767
Pre-frontal cortex	Q3MIE4	Vat1	Synaptic vesicle membrane protein VAT-1 homolog OS=Rattus norvegicus OX=10116 GN=Vat1 PE=1 SV=1	Blue	0.00487	Up	0.836501
Pre-frontal cortex	P24268	Ctsd	Cathepsin D OS=Rattus norvegicus OX=10116 GN=Ctsd PE=1 SV=1	Blue	0.00118	Up	0.810966
Pre-frontal cortex	P17077	Rpl9	60S ribosomal protein L9 OS=Rattus norvegicus OX=10116 GN=Rpl9 PE=1 SV=1	Blue	0.0246	Up	0.810966
Pre-frontal cortex	P28023	Dctn1	Dynactin subunit 1 OS=Rattus norvegicus OX=10116 GN=Dctn1 PE=1 SV=2	Blue	0.00044	Up	0.785875
Pre-frontal cortex	P61765	Stxbp1	Syntaxin-binding protein 1 OS=Rattus norvegicus OX=10116 GN=Stxbp1 PE=1 SV=1	Blue	0.03337	Up	0.785875
Pre-frontal cortex	P23358	Rpl12	60S ribosomal protein L12 OS=Rattus norvegicus OX=10116 GN=Rpl12 PE=2 SV=1	Blue	0.00292	Up	0.761213
Pre-frontal cortex	Q6P7S1	Asah1	Acid ceramidase OS=Rattus norvegicus OX=10116 GN=Asah1 PE=1 SV=1	Orange	0.00335		1.88897
Pre-frontal cortex	P10760	Ahcy	Adenosylhomocysteinase OS=Rattus norvegicus OX=10116 GN=Ahcy PE=1 SV=3	Blue	0.00084	Up	0.736966
Pre-frontal cortex	B5DFC8	Eif3c	Eukaryotic translation initiation factor 3 subunit C OS=Rattus norvegicus OX=10116 GN=Eif3c PE=1 SV=1	Orange	0.00346		1.51457
Pre-frontal cortex	P81377	Prkar1b	cAMP-dependent protein kinase type I-beta regulatory subunit OS=Rattus norvegicus OX=10116 GN=Prkar1b PE=2 SV=2	Orange	0.00351		1.47393
Pre-frontal cortex	Q05764	Add2	Beta-adducin OS=Rattus norvegicus OX=10116 GN=Add2 PE=1 SV=4	Orange	0.00374		1.32193
Pre-frontal cortex	P30835	Pfkl	ATP-dependent 6-phosphofructokinase, liver type OS=Rattus norvegicus OX=10116 GN=Pfkl PE=1 SV=3	Blue	0.00509	Up	0.736966
Pre-frontal cortex	P62278	Rps13	40S ribosomal protein S13 OS=Rattus norvegicus OX=10116 GN=Rps13 PE=1 SV=2	Blue	0.00887	Up	0.736966
Pre-frontal cortex	O35142	Copb2	Coatomer subunit beta' OS=Rattus norvegicus OX=10116 GN=Copb2 PE=1 SV=3	Orange	0.00443		1.21759
Pre-frontal cortex	Q07009	Capn2	Calpain-2 catalytic subunit OS=Rattus norvegicus OX=10116 GN=Capn2 PE=1 SV=3	Blue	0.00191	Up	0.713119
Pre-frontal cortex	P62076	Timm13	Mitochondrial import inner membrane translocase subunit Tim13 OS=Rattus norvegicus OX=10116 GN=Timm13 PE=3 SV=1	Blue	0.00697	Up	0.713119
Pre-frontal cortex	P28480	Tcp1	T-complex protein 1 subunit alpha OS=Rattus norvegicus OX=10116 GN=Tcp1 PE=1 SV=1	Blue	0.01798	Up	0.713119
Pre-frontal cortex	O89049	Txnrd1	Thioredoxin reductase 1, cytoplasmic OS=Rattus norvegicus OX=10116 GN=Txnrd1 PE=1 SV=5	Orange	0.00503		0.971431
Pre-frontal cortex	P60123	Ruvbl1	RuvB-like 1 OS=Rattus norvegicus OX=10116 GN=Ruvbl1 PE=1 SV=1	Orange	0.00507		1.2863
Pre-frontal cortex	P0C1X8	Aak1	AP2-associated protein kinase 1 OS=Rattus norvegicus OX=10116 GN=Aak1 PE=1 SV=1	Blue	0.00189	Up	0.68966
Pre-frontal cortex	P19945	Rplp0	60S acidic ribosomal protein P0 OS=Rattus norvegicus OX=10116 GN=Rplp0 PE=1 SV=2	Blue	0.00978	Up	0.68966
Pre-frontal cortex	Q9QYF3	Myo5a	Unconventional myosin-Va OS=Rattus norvegicus OX=10116 GN=Myo5a PE=1 SV=1	Blue	0.03572	Up	0.68966
Pre-frontal cortex	O35331	Pdxk	Pyridoxal kinase OS=Rattus norvegicus OX=10116 GN=Pdxk PE=1 SV=1	Blue	0.00097	Up	0.666576
Pre-frontal cortex	P62718	Rpl18a	60S ribosomal protein L18a OS=Rattus norvegicus OX=10116 GN=Rpl18a PE=2 SV=1	Blue	0.03611	Up	0.666576
Pre-frontal cortex	O35567	Atic	Bifunctional purine biosynthesis protein ATIC OS=Rattus norvegicus OX=10116 GN=Atic PE=1 SV=2	Blue	0.0101	Up	0.643856
Pre-frontal cortex	P62243	Rps8	40S ribosomal protein S8 OS=Rattus norvegicus OX=10116 GN=Rps8 PE=1 SV=2	Blue	0.0034	Up	0.621488
Pre-frontal cortex	Q9WVK7	Hadh	Hydroxyacyl-coenzyme A dehydrogenase, mitochondrial OS=Rattus norvegicus OX=10116 GN=Hadh PE=2 SV=1	Orange	0.00566		1.18442
Pre-frontal cortex	Q5XI78	Ogdh	2-oxoglutarate dehydrogenase, mitochondrial OS=Rattus norvegicus OX=10116 GN=Ogdh PE=1 SV=1	Blue	0.00438	Up	0.621488
Pre-frontal cortex	Q63598	Pls3	Plastin-3 OS=Rattus norvegicus OX=10116 GN=Pls3 PE=1 SV=2	Orange	0.00591		1.68966
Pre-frontal cortex	Q9Z1Z3	Epn2	Epsin-2 OS=Rattus norvegicus OX=10116 GN=Epn2 PE=1 SV=1	Orange	0.00595		0.785875
Pre-frontal cortex	Q1JU68	Eif3a	Eukaryotic translation initiation factor 3 subunit A OS=Rattus norvegicus OX=10116 GN=Eif3a PE=2 SV=2	Orange	0.00596		1.59946
Pre-frontal cortex	A2RUW1	Tollip	Toll-interacting protein OS=Rattus norvegicus OX=10116 GN=Tollip PE=1 SV=1	Blue	0.00481	Up	0.621488
Pre-frontal cortex	P63047	Sult4a1	Sulfotransferase 4A1 OS=Rattus norvegicus OX=10116 GN=Sult4a1 PE=1 SV=1	Orange	0.00602		-1.20163
Pre-frontal cortex	P56574	Idh2	Isocitrate dehydrogenase [NADP], mitochondrial OS=Rattus norvegicus OX=10116 GN=Idh2 PE=1 SV=2	Blue	0.00708	Up	0.621488
Pre-frontal cortex	O35987	Nsfl1c	NSFL1 cofactor p47 OS=Rattus norvegicus OX=10116 GN=Nsfl1c PE=1 SV=1	Blue	5e-05	Up	0.599462
Pre-frontal cortex	P14046	A1i3	Alpha-1-inhibitor 3 OS=Rattus norvegicus OX=10116 GN=A1i3 PE=1 SV=1	Orange	0.00618		-2.22342
Pre-frontal cortex	Q9JK11	Rtn4	Reticulon-4 OS=Rattus norvegicus OX=10116 GN=Rtn4 PE=1 SV=1	Blue	0.00287	Up	0.599462
Pre-frontal cortex	Q05982	Nme1	Nucleoside diphosphate kinase A OS=Rattus norvegicus OX=10116 GN=Nme1 PE=1 SV=1	Blue	0.00589	Up	0.599462
Pre-frontal cortex	P08461	Dlat	Dihydrolipoyllysine-residue acetyltransferase component of pyruvate dehydrogenase complex, mitochondrial OS=Rattus norvegicus OX=10116 GN=Dlat PE=1 SV=3	Blue	0.01209	Up	0.599462
Pre-frontal cortex	O08618	Prpsap2	Phosphoribosyl pyrophosphate synthase-associated protein 2 OS=Rattus norvegicus OX=10116 GN=Prpsap2 PE=1 SV=1	Orange	0.00707		0.943416
Pre-frontal cortex	P0DJJ3	Sgip1	SH3-containing GRB2-like protein 3-interacting protein 1 OS=Rattus norvegicus OX=10116 GN=Sgip1 PE=1 SV=1	Blue	0.0121	Up	0.599462
Pre-frontal cortex	P63326	Rps10	40S ribosomal protein S10 OS=Rattus norvegicus OX=10116 GN=Rps10 PE=2 SV=1	Blue	0.02431	Up	0.599462
Pre-frontal cortex	Q497B0	Nit2	Omega-amidase NIT2 OS=Rattus norvegicus OX=10116 GN=Nit2 PE=1 SV=1	Orange	0.0078		3.05889
Pre-frontal cortex	P45479	Ppt1	Palmitoyl-protein thioesterase 1 OS=Rattus norvegicus OX=10116 GN=Ppt1 PE=1 SV=1	Orange	0.00806		0.514573
Pre-frontal cortex	P67874	Csnk2b	Casein kinase II subunit beta OS=Rattus norvegicus OX=10116 GN=Csnk2b PE=1 SV=1	Blue	0.00285	Up	0.577767
Pre-frontal cortex	P85973	Pnp	Purine nucleoside phosphorylase OS=Rattus norvegicus OX=10116 GN=Pnp PE=1 SV=1	Blue	0.00545	Up	0.577767
Pre-frontal cortex	Q9EPH8	Pabpc1	Polyadenylate-binding protein 1 OS=Rattus norvegicus OX=10116 GN=Pabpc1 PE=1 SV=1	Blue	0.00914	Up	0.577767
Pre-frontal cortex	P21531	Rpl3	60S ribosomal protein L3 OS=Rattus norvegicus OX=10116 GN=Rpl3 PE=1 SV=3	Blue	0.01596	Up	0.577767
Pre-frontal cortex	Q924N5	Acsbg1	Long-chain-fatty-acid--CoA ligase ACSBG1 OS=Rattus norvegicus OX=10116 GN=Acsbg1 PE=1 SV=1	Blue	0.03366	Up	0.577767
Pre-frontal cortex	Q9JHW0	Psmb7	Proteasome subunit beta type-7 OS=Rattus norvegicus OX=10116 GN=Psmb7 PE=1 SV=1	Blue	0.03416	Up	0.577767
Pre-frontal cortex	P15178	Dars1	Aspartate--tRNA ligase, cytoplasmic OS=Rattus norvegicus OX=10116 GN=Dars1 PE=1 SV=1	Orange	0.00986		1.4344
Pre-frontal cortex	Q4V7D2	Rogdi	Protein rogdi homolog OS=Rattus norvegicus OX=10116 GN=Rogdi PE=1 SV=1	Blue	0.04004	Up	0.577767
Pre-frontal cortex	P62142	Ppp1cb	Serine/threonine-protein phosphatase PP1-beta catalytic subunit OS=Rattus norvegicus OX=10116 GN=Ppp1cb PE=1 SV=3	Orange	0.00997		0.915936
Pre-frontal cortex	Q5XI22	Acat2	Acetyl-CoA acetyltransferase, cytosolic OS=Rattus norvegicus OX=10116 GN=Acat2 PE=1 SV=1	Orange	0.01001		-0.584963
Pre-frontal cortex	P62919	Rpl8	60S ribosomal protein L8 OS=Rattus norvegicus OX=10116 GN=Rpl8 PE=2 SV=2	Blue	0.04195	Up	0.577767
Pre-frontal cortex	Q4FZT9	Psmd2	26S proteasome non-ATPase regulatory subunit 2 OS=Rattus norvegicus OX=10116 GN=Psmd2 PE=1 SV=1	Blue	0.00628	Up	0.556393
Pre-frontal cortex	P62890	Rpl30	60S ribosomal protein L30 OS=Rattus norvegicus OX=10116 GN=Rpl30 PE=3 SV=2	Blue	0.01065	Up	0.556393
Pre-frontal cortex	Q9QXU8	Dync1li1	Cytoplasmic dynein 1 light intermediate chain 1 OS=Rattus norvegicus OX=10116 GN=Dync1li1 PE=1 SV=1	Blue	0.01017	Up	0.535332
Pre-frontal cortex	Q6P7B0	Wars1	Tryptophan--tRNA ligase, cytoplasmic OS=Rattus norvegicus OX=10116 GN=Wars1 PE=1 SV=2	Blue	0.02015	Up	0.535332
Pre-frontal cortex	P18421	Psmb1	Proteasome subunit beta type-1 OS=Rattus norvegicus OX=10116 GN=Psmb1 PE=1 SV=3	Blue	0.04125	Up	0.535332
Pre-frontal cortex	Q8R491	Ehd3	EH domain-containing protein 3 OS=Rattus norvegicus OX=10116 GN=Ehd3 PE=1 SV=2	Blue	0.0082	Up	0.514573
Pre-frontal cortex	Q5M821	Ppm1h	Protein phosphatase 1H OS=Rattus norvegicus OX=10116 GN=Ppm1h PE=1 SV=2	Orange	0.01107		0.736966
Pre-frontal cortex	P61980	Hnrnpk	Heterogeneous nuclear ribonucleoprotein K OS=Rattus norvegicus OX=10116 GN=Hnrnpk PE=1 SV=1	Blue	0.00979	Up	0.514573
Pre-frontal cortex	O88761	Psmd1	26S proteasome non-ATPase regulatory subunit 1 OS=Rattus norvegicus OX=10116 GN=Psmd1 PE=1 SV=1	Orange	0.01138		0.810966
Pre-frontal cortex	B0BNA5	Cotl1	Coactosin-like protein OS=Rattus norvegicus OX=10116 GN=Cotl1 PE=1 SV=1	Blue	0.00995	Up	0.514573
Pre-frontal cortex	P04642	Ldha	L-lactate dehydrogenase A chain OS=Rattus norvegicus OX=10116 GN=Ldha PE=1 SV=1	Red	0.01148		0.304006
Pre-frontal cortex	Q99N27	Snx1	Sorting nexin-1 OS=Rattus norvegicus OX=10116 GN=Snx1 PE=1 SV=1	Orange	0.01187		1
Pre-frontal cortex	P04906	Gstp1	Glutathione S-transferase P OS=Rattus norvegicus OX=10116 GN=Gstp1 PE=1 SV=2	Blue	0.02192	Up	0.514573
Pre-frontal cortex	P54690	Bcat1	Branched-chain-amino-acid aminotransferase, cytosolic OS=Rattus norvegicus OX=10116 GN=Bcat1 PE=1 SV=1	Blue	0.02591	Up	0.514573
Pre-frontal cortex	P18445	Rpl27a	60S ribosomal protein L27a OS=Rattus norvegicus OX=10116 GN=Rpl27a PE=1 SV=3	Orange	0.01272		0.599462
Pre-frontal cortex	P13471	Rps14	40S ribosomal protein S14 OS=Rattus norvegicus OX=10116 GN=Rps14 PE=2 SV=3	Orange	0.01281		0.535332
Pre-frontal cortex	Q9EQV6	Tpp1	Tripeptidyl-peptidase 1 OS=Rattus norvegicus OX=10116 GN=Tpp1 PE=1 SV=1	Orange	0.01281		1.47393
Pre-frontal cortex	Q63083	Nucb1	Nucleobindin-1 OS=Rattus norvegicus OX=10116 GN=Nucb1 PE=1 SV=1	Orange	0.01282		1.12029
Pre-frontal cortex	P55068	Bcan	Brevican core protein OS=Rattus norvegicus OX=10116 GN=Bcan PE=1 SV=2	Blue	0.01454	Up	0.494109
Pre-frontal cortex	Q6AY86	Vps26a	Vacuolar protein sorting-associated protein 26A OS=Rattus norvegicus OX=10116 GN=Vps26a PE=1 SV=1	Orange	0.01297		0.915936
Pre-frontal cortex	A8WCF8	Tprg1l	Tumor protein p63-regulated gene 1-like protein OS=Rattus norvegicus OX=10116 GN=Tprg1l PE=1 SV=1	Orange	0.01349		0.514573
Pre-frontal cortex	P61751	Arf4	ADP-ribosylation factor 4 OS=Rattus norvegicus OX=10116 GN=Arf4 PE=2 SV=2	Orange	0.01352		-0.722466
Pre-frontal cortex	P05371	Clu	Clusterin OS=Rattus norvegicus OX=10116 GN=Clu PE=1 SV=2	Orange	0.01354		1.64386
Pre-frontal cortex	Q7TPB1	Cct4	T-complex protein 1 subunit delta OS=Rattus norvegicus OX=10116 GN=Cct4 PE=1 SV=3	Blue	0.00255	Up	0.473931
Pre-frontal cortex	P62815	Atp6v1b2	V-type proton ATPase subunit B, brain isoform OS=Rattus norvegicus OX=10116 GN=Atp6v1b2 PE=1 SV=1	Blue	0.00495	Up	0.473931
Pre-frontal cortex	O35814	Stip1	Stress-induced-phosphoprotein 1 OS=Rattus norvegicus OX=10116 GN=Stip1 PE=1 SV=1	Blue	0.00528	Up	0.473931
Pre-frontal cortex	Q9EQS0	Taldo1	Transaldolase OS=Rattus norvegicus OX=10116 GN=Taldo1 PE=1 SV=2	Blue	0.00546	Up	0.473931
Pre-frontal cortex	O88588	Pacs1	Phosphofurin acidic cluster sorting protein 1 OS=Rattus norvegicus OX=10116 GN=Pacs1 PE=1 SV=1	Orange	0.01432		1.12029
Pre-frontal cortex	Q6P4Z9	Cops8	COP9 signalosome complex subunit 8 OS=Rattus norvegicus OX=10116 GN=Cops8 PE=2 SV=1	Orange	0.01436		0.68966
Pre-frontal cortex	P53678	Ap3m2	AP-3 complex subunit mu-2 OS=Rattus norvegicus OX=10116 GN=Ap3m2 PE=2 SV=1	Blue	0.03673	Up	0.473931
Pre-frontal cortex	Q6AYT3	Rtcb	RNA-splicing ligase RtcB homolog OS=Rattus norvegicus OX=10116 GN=Rtcb PE=2 SV=1	Blue	0.00601	Up	0.434403
Pre-frontal cortex	O35095	Ncdn	Neurochondrin OS=Rattus norvegicus OX=10116 GN=Ncdn PE=1 SV=2	Blue	0.01055	Up	0.434403
Pre-frontal cortex	O35314	Chgb	Secretogranin-1 OS=Rattus norvegicus OX=10116 GN=Chgb PE=1 SV=2	Orange	0.01481		1.25154
Pre-frontal cortex	Q9Z1N4	Bpnt1	3'(2'),5'-bisphosphate nucleotidase 1 OS=Rattus norvegicus OX=10116 GN=Bpnt1 PE=1 SV=1	Red	0.01489		-0.356144
Pre-frontal cortex	P29066	Arrb1	Beta-arrestin-1 OS=Rattus norvegicus OX=10116 GN=Arrb1 PE=1 SV=1	Orange	0.01495		0.535332
Pre-frontal cortex	Q04462	Vars1	Valine--tRNA ligase OS=Rattus norvegicus OX=10116 GN=Vars1 PE=2 SV=2	Orange	0.0151		1.59946
Pre-frontal cortex	G3V9R8	Hnrnpc	Heterogeneous nuclear ribonucleoprotein C OS=Rattus norvegicus OX=10116 GN=Hnrnpc PE=1 SV=2	Orange	0.0151		1.152
Pre-frontal cortex	P50554	Abat	4-aminobutyrate aminotransferase, mitochondrial OS=Rattus norvegicus OX=10116 GN=Abat PE=1 SV=3	Blue	0.01385	Up	0.434403
Pre-frontal cortex	Q63754	Sncb	Beta-synuclein OS=Rattus norvegicus OX=10116 GN=Sncb PE=1 SV=1	Blue	0.01423	Up	0.434403
Pre-frontal cortex	P38650	Dync1h1	Cytoplasmic dynein 1 heavy chain 1 OS=Rattus norvegicus OX=10116 GN=Dync1h1 PE=1 SV=1	Red	0.01647		0.37707
Pre-frontal cortex	Q3ZBA0	Tecpr1	Tectonin beta-propeller repeat-containing protein 1 OS=Rattus norvegicus OX=10116 GN=Tecpr1 PE=2 SV=1	Orange	0.01653		0.577767
Pre-frontal cortex	Q9ERH3	Wdr7	WD repeat-containing protein 7 OS=Rattus norvegicus OX=10116 GN=Wdr7 PE=1 SV=1	Orange	0.01698		0.599462
Pre-frontal cortex	P25809	Ckmt1	Creatine kinase U-type, mitochondrial OS=Rattus norvegicus OX=10116 GN=Ckmt1 PE=1 SV=1	Red	0.01714		-0.344828
Pre-frontal cortex	P50399	Gdi2	Rab GDP dissociation inhibitor beta OS=Rattus norvegicus OX=10116 GN=Gdi2 PE=1 SV=2	Blue	0.01282	Up	0.415037
Pre-frontal cortex	P42676	Nln	Neurolysin, mitochondrial OS=Rattus norvegicus OX=10116 GN=Nln PE=1 SV=1	Orange	0.01743		-0.933573
Pre-frontal cortex	P36972	Aprt	Adenine phosphoribosyltransferase OS=Rattus norvegicus OX=10116 GN=Aprt PE=1 SV=1	Orange	0.0175		0.971431
Pre-frontal cortex	Q08163	Cap1	Adenylyl cyclase-associated protein 1 OS=Rattus norvegicus OX=10116 GN=Cap1 PE=1 SV=3	Blue	0.01392	Up	0.415037
Pre-frontal cortex	Q5M7A4	Uba5	Ubiquitin-like modifier-activating enzyme 5 OS=Rattus norvegicus OX=10116 GN=Uba5 PE=1 SV=1	Orange	0.01786		0.971431
Pre-frontal cortex	Q5RKI1	Eif4a2	Eukaryotic initiation factor 4A-II OS=Rattus norvegicus OX=10116 GN=Eif4a2 PE=1 SV=1	Blue	0.00688	Up	0.395929
Pre-frontal cortex	P07323	Eno2	Gamma-enolase OS=Rattus norvegicus OX=10116 GN=Eno2 PE=1 SV=2	Blue	0.00722	Up	0.395929
Pre-frontal cortex	P97536	Cand1	Cullin-associated NEDD8-dissociated protein 1 OS=Rattus norvegicus OX=10116 GN=Cand1 PE=1 SV=1	Blue	0.0033	Up	0.358454
Pre-frontal cortex	Q505J8	Farsa	Phenylalanine--tRNA ligase alpha subunit OS=Rattus norvegicus OX=10116 GN=Farsa PE=1 SV=1	Orange	0.0191		1.68966
Pre-frontal cortex	Q80U96	Xpo1	Exportin-1 OS=Rattus norvegicus OX=10116 GN=Xpo1 PE=1 SV=1	Red	0.01939		0.395929
Pre-frontal cortex	Q99PD4	Arpc1a	Actin-related protein 2/3 complex subunit 1A OS=Rattus norvegicus OX=10116 GN=Arpc1a PE=2 SV=1	Blue	0.0016	Down	-0.286881
Pre-frontal cortex	Q5U318	Pea15	Astrocytic phosphoprotein PEA-15 OS=Rattus norvegicus OX=10116 GN=Pea15 PE=1 SV=1	Red	0.01955		0.395929
Pre-frontal cortex	Q62658	Fkbp1a	Peptidyl-prolyl cis-trans isomerase FKBP1A OS=Rattus norvegicus OX=10116 GN=Fkbp1a PE=1 SV=3	Blue	0.00174	Down	-0.443607
Pre-frontal cortex	Q5FVQ9	Tbce	Tubulin-specific chaperone E OS=Rattus norvegicus OX=10116 GN=Tbce PE=2 SV=1	Orange	0.02043		-0.773996
Pre-frontal cortex	Q811X6	Cryl1	Lambda-crystallin homolog OS=Rattus norvegicus OX=10116 GN=Cryl1 PE=1 SV=3	Orange	0.02056		1.05889
Pre-frontal cortex	Q80W92	Vac14	Protein VAC14 homolog OS=Rattus norvegicus OX=10116 GN=Vac14 PE=1 SV=1	Orange	0.0214		1
Pre-frontal cortex	P63086	Mapk1	Mitogen-activated protein kinase 1 OS=Rattus norvegicus OX=10116 GN=Mapk1 PE=1 SV=3	Red	0.02163		0.395929
Pre-frontal cortex	Q63797	Psme1	Proteasome activator complex subunit 1 OS=Rattus norvegicus OX=10116 GN=Psme1 PE=2 SV=1	Orange	0.02172		1.05889
Pre-frontal cortex	P84087	Cplx2	Complexin-2 OS=Rattus norvegicus OX=10116 GN=Cplx2 PE=1 SV=1	Blue	0.01391	Down	-0.454176
Pre-frontal cortex	P27682	Scg5	Neuroendocrine protein 7B2 OS=Rattus norvegicus OX=10116 GN=Scg5 PE=1 SV=1	Orange	0.02195		1.25154
Pre-frontal cortex	P07632	Sod1	Superoxide dismutase [Cu-Zn] OS=Rattus norvegicus OX=10116 GN=Sod1 PE=1 SV=2	Red	0.02214		0.415037
Pre-frontal cortex	O09175	Rnpep	Aminopeptidase B OS=Rattus norvegicus OX=10116 GN=Rnpep PE=1 SV=2	Red	0.02331		-0.411426
Pre-frontal cortex	P61314	Rpl15	60S ribosomal protein L15 OS=Rattus norvegicus OX=10116 GN=Rpl15 PE=1 SV=2	Orange	0.02339		0.761213
Pre-frontal cortex	P31977	Ezr	Ezrin OS=Rattus norvegicus OX=10116 GN=Ezr PE=1 SV=3	Orange	0.02375		0.643856
Pre-frontal cortex	Q4FZT2	Ppme1	Protein phosphatase methylesterase 1 OS=Rattus norvegicus OX=10116 GN=Ppme1 PE=1 SV=2	Blue	0.01144	Down	-0.485427
Pre-frontal cortex	P01946	Hba1	Hemoglobin subunit alpha-1/2 OS=Rattus norvegicus OX=10116 GN=Hba1 PE=1 SV=3	Blue	0.02813	Down	-0.485427
Pre-frontal cortex	P40329	Rars1	Arginine--tRNA ligase, cytoplasmic OS=Rattus norvegicus OX=10116 GN=Rars1 PE=1 SV=2	Orange	0.02492		0.915936
Pre-frontal cortex	Q32PX7	Fubp1	Far upstream element-binding protein 1 OS=Rattus norvegicus OX=10116 GN=Fubp1 PE=1 SV=1	Orange	0.02508		1.12029
Pre-frontal cortex	P00762	Prss1	Serine protease 1 OS=Rattus norvegicus OX=10116 GN=Prss1 PE=1 SV=1	Blue	0.02937	Down	-0.495695
Pre-frontal cortex	P97532	Mpst	3-mercaptopyruvate sulfurtransferase OS=Rattus norvegicus OX=10116 GN=Mpst PE=1 SV=3	Red	0.02564		0.434403
Pre-frontal cortex	O35550	Rabep1	Rab GTPase-binding effector protein 1 OS=Rattus norvegicus OX=10116 GN=Rabep1 PE=1 SV=1	Orange	0.02583		2.39593
Pre-frontal cortex	Q6RJR6	Rtn3	Reticulon-3 OS=Rattus norvegicus OX=10116 GN=Rtn3 PE=1 SV=1	Blue	0.00095	Down	-0.584963
Pre-frontal cortex	P62268	Rps23	40S ribosomal protein S23 OS=Rattus norvegicus OX=10116 GN=Rps23 PE=1 SV=3	Orange	0.02629		0.68966
Pre-frontal cortex	Q66HF8	Aldh1b1	Aldehyde dehydrogenase X, mitochondrial OS=Rattus norvegicus OX=10116 GN=Aldh1b1 PE=1 SV=1	Orange	0.02657		0.736966
Pre-frontal cortex	P62628	Dynlrb1	Dynein light chain roadblock-type 1 OS=Rattus norvegicus OX=10116 GN=Dynlrb1 PE=1 SV=3	Red	0.0268		0.395929
Pre-frontal cortex	P10960	Psap	Prosaposin OS=Rattus norvegicus OX=10116 GN=Psap PE=1 SV=1	Red	0.02715		0.358454
Pre-frontal cortex	Q68A21	Purb	Transcriptional activator protein Pur-beta OS=Rattus norvegicus OX=10116 GN=Purb PE=1 SV=3	Blue	0.029	Down	-0.584963
Pre-frontal cortex	Q6P9U8	Eif3h	Eukaryotic translation initiation factor 3 subunit H OS=Rattus norvegicus OX=10116 GN=Eif3h PE=1 SV=1	Orange	0.02814		1.39593
Pre-frontal cortex	P18088	Gad1	Glutamate decarboxylase 1 OS=Rattus norvegicus OX=10116 GN=Gad1 PE=1 SV=1	Orange	0.02846		1.152
Pre-frontal cortex	Q5U2U2	Crkl	Crk-like protein OS=Rattus norvegicus OX=10116 GN=Crkl PE=1 SV=1	Orange	0.02873		0.836501
Pre-frontal cortex	Q9Z272	Git1	ARF GTPase-activating protein GIT1 OS=Rattus norvegicus OX=10116 GN=Git1 PE=1 SV=1	Orange	0.02874		0.599462
Pre-frontal cortex	B0BNM1	Naxe	NAD(P)H-hydrate epimerase OS=Rattus norvegicus OX=10116 GN=Naxe PE=2 SV=1	Orange	0.02876		0.454032
Pre-frontal cortex	P47198	Rpl22	60S ribosomal protein L22 OS=Rattus norvegicus OX=10116 GN=Rpl22 PE=2 SV=2	Red	0.02879		0.415037
Pre-frontal cortex	P04631	S100b	Protein S100-B OS=Rattus norvegicus OX=10116 GN=S100b PE=1 SV=2	Blue	0.0113	Down	-0.604071
Pre-frontal cortex	O55096	Dpp3	Dipeptidyl peptidase 3 OS=Rattus norvegicus OX=10116 GN=Dpp3 PE=1 SV=2	Orange	0.02915		0.577767
Pre-frontal cortex	Q5XIM7	Kars1	Lysine--tRNA ligase OS=Rattus norvegicus OX=10116 GN=Kars1 PE=1 SV=1	Orange	0.02925		1.35845
Pre-frontal cortex	O08815	Slk	STE20-like serine/threonine-protein kinase OS=Rattus norvegicus OX=10116 GN=Slk PE=1 SV=1	Orange	0.02936		1.21759
Pre-frontal cortex	P15999	Atp5f1a	ATP synthase subunit alpha, mitochondrial OS=Rattus norvegicus OX=10116 GN=Atp5f1a PE=1 SV=2	Blue	0.01465	Down	-0.604071
Pre-frontal cortex	Q62868	Rock2	Rho-associated protein kinase 2 OS=Rattus norvegicus OX=10116 GN=Rock2 PE=1 SV=2	Blue	0.03332	Down	-0.613532
Pre-frontal cortex	Q9WUC4	Atox1	Copper transport protein ATOX1 OS=Rattus norvegicus OX=10116 GN=Atox1 PE=1 SV=1	Orange	0.03024		-0.903038
Pre-frontal cortex	O08557	Ddah1	N(G),N(G)-dimethylarginine dimethylaminohydrolase 1 OS=Rattus norvegicus OX=10116 GN=Ddah1 PE=1 SV=3	Red	0.03136		0.454032
Pre-frontal cortex	P13676	Apeh	Acylamino-acid-releasing enzyme OS=Rattus norvegicus OX=10116 GN=Apeh PE=1 SV=1	Orange	0.03139		0.535332
Pre-frontal cortex	P11762	Lgals1	Galectin-1 OS=Rattus norvegicus OX=10116 GN=Lgals1 PE=1 SV=2	Orange	0.0315		1
Pre-frontal cortex	P82995	Hsp90aa1	Heat shock protein HSP 90-alpha OS=Rattus norvegicus OX=10116 GN=Hsp90aa1 PE=1 SV=3	Red	0.03156		0.434403
Pre-frontal cortex	Q9JMJ4	Prpf19	Pre-mRNA-processing factor 19 OS=Rattus norvegicus OX=10116 GN=Prpf19 PE=1 SV=2	Orange	0.03279		1.55639
Pre-frontal cortex	Q5XI73	Arhgdia	Rho GDP-dissociation inhibitor 1 OS=Rattus norvegicus OX=10116 GN=Arhgdia PE=1 SV=1	Red	0.03287		0.251539
Pre-frontal cortex	P56558	Ogt	UDP-N-acetylglucosamine--peptide N-acetylglucosaminyltransferase 110 kDa subunit OS=Rattus norvegicus OX=10116 GN=Ogt PE=1 SV=1	Blue	0.03458	Down	-0.62293
Pre-frontal cortex	P46462	Vcp	Transitional endoplasmic reticulum ATPase OS=Rattus norvegicus OX=10116 GN=Vcp PE=1 SV=3	Red	0.03296		0.340075
Pre-frontal cortex	P62909	Rps3	40S ribosomal protein S3 OS=Rattus norvegicus OX=10116 GN=Rps3 PE=1 SV=1	Red	0.03296		0.454032
Pre-frontal cortex	P07171	Calb1	Calbindin OS=Rattus norvegicus OX=10116 GN=Calb1 PE=1 SV=2	Blue	0.00038	Down	-0.632268
Pre-frontal cortex	P62882	Gnb5	Guanine nucleotide-binding protein subunit beta-5 OS=Rattus norvegicus OX=10116 GN=Gnb5 PE=2 SV=1	Blue	0.01007	Down	-0.650765
Pre-frontal cortex	P30009	Marcks	Myristoylated alanine-rich C-kinase substrate OS=Rattus norvegicus OX=10116 GN=Marcks PE=1 SV=2	Blue	0.0195	Down	-0.659925
Pre-frontal cortex	Q5XI83	Vps35l	VPS35 endosomal protein-sorting factor-like OS=Rattus norvegicus OX=10116 GN=Vps35l PE=2 SV=1	Orange	0.0336		1.05889
Pre-frontal cortex	P62824	Rab3c	Ras-related protein Rab-3C OS=Rattus norvegicus OX=10116 GN=Rab3c PE=1 SV=1	Blue	0.03876	Down	-0.669027
Pre-frontal cortex	Q62703	Rcn2	Reticulocalbin-2 OS=Rattus norvegicus OX=10116 GN=Rcn2 PE=1 SV=2	Orange	0.03379		-0.790772
Pre-frontal cortex	P08413	Camk2b	Calcium/calmodulin-dependent protein kinase type II subunit beta OS=Rattus norvegicus OX=10116 GN=Camk2b PE=1 SV=1	Blue	0.03294	Down	-0.687061
Pre-frontal cortex	P50503	St13	Hsc70-interacting protein OS=Rattus norvegicus OX=10116 GN=St13 PE=1 SV=1	Red	0.03399		0.395929
Pre-frontal cortex	O08629	Trim28	Transcription intermediary factor 1-beta OS=Rattus norvegicus OX=10116 GN=Trim28 PE=1 SV=2	Orange	0.03409		1.59946
Pre-frontal cortex	P17105	Itpka	Inositol-trisphosphate 3-kinase A OS=Rattus norvegicus OX=10116 GN=Itpka PE=1 SV=3	Blue	0.01013	Down	-0.773996
Pre-frontal cortex	D3ZW55	Itpa	Inosine triphosphate pyrophosphatase OS=Rattus norvegicus OX=10116 GN=Itpa PE=3 SV=1	Blue	0.02527	Down	-0.782409
Pre-frontal cortex	Q01066	Pde1b	Calcium/calmodulin-dependent 3',5'-cyclic nucleotide phosphodiesterase 1B OS=Rattus norvegicus OX=10116 GN=Pde1b PE=1 SV=1	Orange	0.03468		-0.748461
Pre-frontal cortex	P41542	Uso1	General vesicular transport factor p115 OS=Rattus norvegicus OX=10116 GN=Uso1 PE=1 SV=1	Orange	0.03471		0.494109
Pre-frontal cortex	P85845	Fscn1	Fascin OS=Rattus norvegicus OX=10116 GN=Fscn1 PE=1 SV=2	Red	0.0349		0.251539
Pre-frontal cortex	P35434	Atp5f1d	ATP synthase subunit delta, mitochondrial OS=Rattus norvegicus OX=10116 GN=Atp5f1d PE=1 SV=2	Blue	0.01795	Down	-0.978196
Pre-frontal cortex	P35435	Atp5f1c	ATP synthase subunit gamma, mitochondrial OS=Rattus norvegicus OX=10116 GN=Atp5f1c PE=1 SV=2	Blue	0.01026	Down	-0.9855
Pre-frontal cortex	P60881	Snap25	Synaptosomal-associated protein 25 OS=Rattus norvegicus OX=10116 GN=Snap25 PE=1 SV=1	Blue	0.01824	Down	-1.0072
Pre-frontal cortex	D3ZAA9	Mpp2	MAGUK p55 subfamily member 2 OS=Rattus norvegicus OX=10116 GN=Mpp2 PE=1 SV=2	Blue	0.039	Down	-1.07039
Pre-frontal cortex	O35764	Nptxr	Neuronal pentraxin receptor OS=Rattus norvegicus OX=10116 GN=Nptxr PE=1 SV=1	Blue	0.01436	Down	-1.1375
Pre-frontal cortex	B5DF91	Elavl1	ELAV-like protein 1 OS=Rattus norvegicus OX=10116 GN=Elavl1 PE=1 SV=1	Orange	0.03686		0.862496
Pre-frontal cortex	Q641X8	Eif3e	Eukaryotic translation initiation factor 3 subunit E OS=Rattus norvegicus OX=10116 GN=Eif3e PE=2 SV=1	Orange	0.03756		1.08927
Pre-frontal cortex	P50398	Gdi1	Rab GDP dissociation inhibitor alpha OS=Rattus norvegicus OX=10116 GN=Gdi1 PE=1 SV=1	Red	0.03758		0.234465
Pre-frontal cortex	P37805	Tagln3	Transgelin-3 OS=Rattus norvegicus OX=10116 GN=Tagln3 PE=1 SV=2	Red	0.03774		0.415037
Pre-frontal cortex	P20059	Hpx	Hemopexin OS=Rattus norvegicus OX=10116 GN=Hpx PE=1 SV=3	Orange	0.03788		-1.72683
Pre-frontal cortex	O54924	Exoc8	Exocyst complex component 8 OS=Rattus norvegicus OX=10116 GN=Exoc8 PE=1 SV=1	Orange	0.03798		-0.863938
Pre-frontal cortex	P11275	Camk2a	Calcium/calmodulin-dependent protein kinase type II subunit alpha OS=Rattus norvegicus OX=10116 GN=Camk2a PE=1 SV=1	Blue	0.0026	Down	-1.16993
Pre-frontal cortex	P09951	Syn1	Synapsin-1 OS=Rattus norvegicus OX=10116 GN=Syn1 PE=1 SV=3	Orange	0.0385		0.535332
Pre-frontal cortex	P62762	Vsnl1	Visinin-like protein 1 OS=Rattus norvegicus OX=10116 GN=Vsnl1 PE=1 SV=2	Red	0.03874		-0.321928
Pre-frontal cortex	O08651	Phgdh	D-3-phosphoglycerate dehydrogenase OS=Rattus norvegicus OX=10116 GN=Phgdh PE=1 SV=3	Blue	0.00411	Down	-1.19535
Pre-frontal cortex	Q5XIM9	Cct2	T-complex protein 1 subunit beta OS=Rattus norvegicus OX=10116 GN=Cct2 PE=1 SV=3	Red	0.0388		0.340075
Pre-frontal cortex	Q63081	Pdia6	Protein disulfide-isomerase A6 OS=Rattus norvegicus OX=10116 GN=Pdia6 PE=1 SV=2	Red	0.03896		0.415037
Pre-frontal cortex	P03994	Hapln1	Hyaluronan and proteoglycan link protein 1 OS=Rattus norvegicus OX=10116 GN=Hapln1 PE=1 SV=2	Blue	0.03676	Down	-1.37295
Pre-frontal cortex	P20651	Ppp3cb	Serine/threonine-protein phosphatase 2B catalytic subunit beta isoform OS=Rattus norvegicus OX=10116 GN=Ppp3cb PE=1 SV=1	Red	0.03915		0.251539
Pre-frontal cortex	P18298	Mat2a	S-adenosylmethionine synthase isoform type-2 OS=Rattus norvegicus OX=10116 GN=Mat2a PE=1 SV=1	Orange	0.03933		0.577767
Pre-frontal cortex	P16446	Pitpna	Phosphatidylinositol transfer protein alpha isoform OS=Rattus norvegicus OX=10116 GN=Pitpna PE=1 SV=2	Red	0.03998		-0.443607
Pre-frontal cortex	Q920L2	Sdha	Succinate dehydrogenase [ubiquinone] flavoprotein subunit, mitochondrial OS=Rattus norvegicus OX=10116 GN=Sdha PE=1 SV=1	Blue	0.0174	Down	-1.37851
Pre-frontal cortex	P09117	Aldoc	Fructose-bisphosphate aldolase C OS=Rattus norvegicus OX=10116 GN=Aldoc PE=1 SV=3	Red	0.04066		0.304006
Pre-frontal cortex	F1LNJ2	Snrnp200	U5 small nuclear ribonucleoprotein 200 kDa helicase OS=Rattus norvegicus OX=10116 GN=Snrnp200 PE=1 SV=1	Orange	0.04085		0.971431
Pre-frontal cortex	Q4AEF8	Copg1	Coatomer subunit gamma-1 OS=Rattus norvegicus OX=10116 GN=Copg1 PE=2 SV=1	Orange	0.04089		1.8365
Pre-frontal cortex	Q68FY0	Uqcrc1	Cytochrome b-c1 complex subunit 1, mitochondrial OS=Rattus norvegicus OX=10116 GN=Uqcrc1 PE=1 SV=1	Blue	0.01529	Down	-1.68706
Pre-frontal cortex	Q5U300	Uba1	Ubiquitin-like modifier-activating enzyme 1 OS=Rattus norvegicus OX=10116 GN=Uba1 PE=1 SV=1	Red	0.04129		-0.263034
Pre-frontal cortex	P52481	Cap2	Adenylyl cyclase-associated protein 2 OS=Rattus norvegicus OX=10116 GN=Cap2 PE=1 SV=1	Red	0.04138		-0.201634
Pre-frontal cortex	P61972	Nutf2	Nuclear transport factor 2 OS=Rattus norvegicus OX=10116 GN=Nutf2 PE=1 SV=1	Blue	0.00011	Down	-2.17313
Pre-frontal cortex	Q01986	Map2k1	Dual specificity mitogen-activated protein kinase kinase 1 OS=Rattus norvegicus OX=10116 GN=Map2k1 PE=1 SV=2	Red	0.04281		0.304006
Pre-frontal cortex	P56603	Scamp1	Secretory carrier-associated membrane protein 1 OS=Rattus norvegicus OX=10116 GN=Scamp1 PE=1 SV=1	Orange	0.04297		1.35845
Pre-frontal cortex	P48721	Hspa9	Stress-70 protein, mitochondrial OS=Rattus norvegicus OX=10116 GN=Hspa9 PE=1 SV=3	Red	0.04442		0.321928
Pre-frontal cortex	P47971	Nptx1	Neuronal pentraxin-1 OS=Rattus norvegicus OX=10116 GN=Nptx1 PE=1 SV=1	Green	0.04501		0.621488
Pre-frontal cortex	P63174	Rpl38	60S ribosomal protein L38 OS=Rattus norvegicus OX=10116 GN=Rpl38 PE=1 SV=2	Green	0.0451		0.810966
Pre-frontal cortex	Q2PQA9	Kif5b	Kinesin-1 heavy chain OS=Rattus norvegicus OX=10116 GN=Kif5b PE=1 SV=1	Green	0.04517		0.666576
Pre-frontal cortex	Q6AYK6	Cacybp	Calcyclin-binding protein OS=Rattus norvegicus OX=10116 GN=Cacybp PE=1 SV=1	Green	0.04518		0.514573
Pre-frontal cortex	Q64640	Adk	Adenosine kinase OS=Rattus norvegicus OX=10116 GN=Adk PE=1 SV=3	Green	0.04522		-0.641546
Pre-frontal cortex	F1LYQ8	Farp1	FERM, ARHGEF and pleckstrin domain-containing protein 1 OS=Rattus norvegicus OX=10116 GN=Farp1 PE=1 SV=2	Green	0.04576		-8.32418
Pre-frontal cortex	Q05962	Slc25a4	ADP/ATP translocase 1 OS=Rattus norvegicus OX=10116 GN=Slc25a4 PE=1 SV=3	Green	0.04578		-1.32193
Pre-frontal cortex	Q99JE4	Rasgrf2	Ras-specific guanine nucleotide-releasing factor 2 OS=Rattus norvegicus OX=10116 GN=Rasgrf2 PE=1 SV=1	Green	0.04602		-1.29278
Pre-frontal cortex	O88600	Hspa4	Heat shock 70 kDa protein 4 OS=Rattus norvegicus OX=10116 GN=Hspa4 PE=1 SV=1	Red	0.04716		0.268817
Pre-frontal cortex	Q99MZ4	Ggt7	Glutathione hydrolase 7 OS=Rattus norvegicus OX=10116 GN=Ggt7 PE=1 SV=2	Green	0.04728		-2.1177
Pre-frontal cortex	P09812	Pygm	Glycogen phosphorylase, muscle form OS=Rattus norvegicus OX=10116 GN=Pygm PE=1 SV=5	Red	0.04818		-0.367371
Pre-frontal cortex	P13803	Etfa	Electron transfer flavoprotein subunit alpha, mitochondrial OS=Rattus norvegicus OX=10116 GN=Etfa PE=1 SV=4	Red	0.04825		0.434403
Pre-frontal cortex	Q9QYW3	Mob4	MOB-like protein phocein OS=Rattus norvegicus OX=10116 GN=Mob4 PE=1 SV=1	Green	0.04841		0.971431
Pre-frontal cortex	Q5FVI6	Atp6v1c1	V-type proton ATPase subunit C 1 OS=Rattus norvegicus OX=10116 GN=Atp6v1c1 PE=1 SV=1	Red	0.04948		0.251539
Pre-frontal cortex	P62775	Mtpn	Myotrophin OS=Rattus norvegicus OX=10116 GN=Mtpn PE=1 SV=2	Red	0.04961		0.304006
Pre-frontal cortex	D3ZFB6	Prrt2	Proline-rich transmembrane protein 2 OS=Rattus norvegicus OX=10116 GN=Prrt2 PE=1 SV=1	Green	0.05004		0.915936
Pre-frontal cortex	P04256	Hnrnpa1	Heterogeneous nuclear ribonucleoprotein A1 OS=Rattus norvegicus OX=10116 GN=Hnrnpa1 PE=1 SV=3	Green	0.05134		0.761213
Pre-frontal cortex	P02401	Rplp2	60S acidic ribosomal protein P2 OS=Rattus norvegicus OX=10116 GN=Rplp2 PE=1 SV=2	Red	0.05171		0.340075
Pre-frontal cortex	Q91Y81	Septin2	Septin-2 OS=Rattus norvegicus OX=10116 GN=Septin2 PE=1 SV=1	Green	0.05174		0.862496
Pre-frontal cortex	P34058	Hsp90ab1	Heat shock protein HSP 90-beta OS=Rattus norvegicus OX=10116 GN=Hsp90ab1 PE=1 SV=4	Red	0.05201		0.304006
Pre-frontal cortex	Q8VIL3	Zwint	ZW10 interactor OS=Rattus norvegicus OX=10116 GN=Zwint PE=1 SV=1	Green	0.05259		1.47393
Pre-frontal cortex	P11598	Pdia3	Protein disulfide-isomerase A3 OS=Rattus norvegicus OX=10116 GN=Pdia3 PE=1 SV=2	Red	0.05274		-0.475085
Pre-frontal cortex	Q8VD52	Pdxp	Chronophin OS=Rattus norvegicus OX=10116 GN=Pdxp PE=1 SV=2	Green	0.05276		0.599462
Pre-frontal cortex	Q6P747	Hp1bp3	Heterochromatin protein 1-binding protein 3 OS=Rattus norvegicus OX=10116 GN=Hp1bp3 PE=1 SV=1	Green	0.05293		1.05889
Pre-frontal cortex	Q5XFX0	Tagln2	Transgelin-2 OS=Rattus norvegicus OX=10116 GN=Tagln2 PE=1 SV=1	Green	0.05481		1.78588
Pre-frontal cortex	P47967	Lgals5	Galectin-5 OS=Rattus norvegicus OX=10116 GN=Lgals5 PE=1 SV=2	Green	0.05565		-1.83592
Pre-frontal cortex	P30349	Lta4h	Leukotriene A-4 hydrolase OS=Rattus norvegicus OX=10116 GN=Lta4h PE=1 SV=3	Green	0.05599		0.556393
Pre-frontal cortex	Q00981	Uchl1	Ubiquitin carboxyl-terminal hydrolase isozyme L1 OS=Rattus norvegicus OX=10116 GN=Uchl1 PE=1 SV=2	Red	0.05608		0.321928
Pre-frontal cortex	P83941	Eloc	Elongin-C OS=Rattus norvegicus OX=10116 GN=Eloc PE=1 SV=1	Green	0.05655		0.514573
Pre-frontal cortex	Q9WVA1	Timm8a	Mitochondrial import inner membrane translocase subunit Tim8 A OS=Rattus norvegicus OX=10116 GN=Timm8a PE=1 SV=1	Red	0.05707		0.395929
Pre-frontal cortex	Q09073	Slc25a5	ADP/ATP translocase 2 OS=Rattus norvegicus OX=10116 GN=Slc25a5 PE=1 SV=3	Green	0.05743		-1.60407
Pre-frontal cortex	P0C5X8	Ttyh1	Protein tweety homolog 1 OS=Rattus norvegicus OX=10116 GN=Ttyh1 PE=1 SV=1	Green	0.05754		-1.70929
Pre-frontal cortex	Q925N3	Pex5l	PEX5-related protein OS=Rattus norvegicus OX=10116 GN=Pex5l PE=1 SV=1	Green	0.05793		3.32193
Pre-frontal cortex	Q4VSI4	Usp7	Ubiquitin carboxyl-terminal hydrolase 7 OS=Rattus norvegicus OX=10116 GN=Usp7 PE=1 SV=1	Green	0.05797		-1.26303
Pre-frontal cortex	P16036	Slc25a3	Phosphate carrier protein, mitochondrial OS=Rattus norvegicus OX=10116 GN=Slc25a3 PE=1 SV=1	Green	0.05813		-1.18269
Pre-frontal cortex	Q4KLF8	Arpc5	Actin-related protein 2/3 complex subunit 5 OS=Rattus norvegicus OX=10116 GN=Arpc5 PE=1 SV=3	Red	0.05816		0.473931
Pre-frontal cortex	P62747	Rhob	Rho-related GTP-binding protein RhoB OS=Rattus norvegicus OX=10116 GN=Rhob PE=1 SV=1	Green	0.05831		-0.956057
Pre-frontal cortex	Q566C7	Nudt3	Diphosphoinositol polyphosphate phosphohydrolase 1 OS=Rattus norvegicus OX=10116 GN=Nudt3 PE=1 SV=1	Red	0.05851		-0.275007
Pre-frontal cortex	P48500	Tpi1	Triosephosphate isomerase OS=Rattus norvegicus OX=10116 GN=Tpi1 PE=1 SV=2	Red	0.05866		0.217591
Pre-frontal cortex	P62755	Rps6	40S ribosomal protein S6 OS=Rattus norvegicus OX=10116 GN=Rps6 PE=1 SV=1	Red	0.05928		0.340075
Pre-frontal cortex	P40112	Psmb3	Proteasome subunit beta type-3 OS=Rattus norvegicus OX=10116 GN=Psmb3 PE=1 SV=1	Red	0.05937		0.37707
Pre-frontal cortex	P27139	Ca2	Carbonic anhydrase 2 OS=Rattus norvegicus OX=10116 GN=Ca2 PE=1 SV=2	Red	0.05943		0.321928
Pre-frontal cortex	Q9Z0V6	Prdx3	Thioredoxin-dependent peroxide reductase, mitochondrial OS=Rattus norvegicus OX=10116 GN=Prdx3 PE=1 SV=2	Red	0.05966		0.340075
Pre-frontal cortex	Q5XII0	Epdr1	Mammalian ependymin-related protein 1 OS=Rattus norvegicus OX=10116 GN=Epdr1 PE=1 SV=1	Red	0.06027		0.454032
Pre-frontal cortex	Q6DGG0	Ppid	Peptidyl-prolyl cis-trans isomerase D OS=Rattus norvegicus OX=10116 GN=Ppid PE=1 SV=3	Red	0.06035		0.454032
Pre-frontal cortex	P47727	Cbr1	Carbonyl reductase [NADPH] 1 OS=Rattus norvegicus OX=10116 GN=Cbr1 PE=1 SV=2	Red	0.06054		0.37707
Pre-frontal cortex	P62959	Hint1	Adenosine 5'-monophosphoramidase HINT1 OS=Rattus norvegicus OX=10116 GN=Hint1 PE=1 SV=5	Red	0.06063		0.321928
Pre-frontal cortex	B0BNN3	Ca1	Carbonic anhydrase 1 OS=Rattus norvegicus OX=10116 GN=Ca1 PE=1 SV=1	Green	0.06172		-0.555816
Pre-frontal cortex	Q80W83	Ppp2r5b	Serine/threonine-protein phosphatase 2A 56 kDa regulatory subunit beta isoform OS=Rattus norvegicus OX=10116 GN=Ppp2r5b PE=2 SV=1	Green	0.06188		-0.799087
Pre-frontal cortex	Q66HA8	Hsph1	Heat shock protein 105 kDa OS=Rattus norvegicus OX=10116 GN=Hsph1 PE=1 SV=1	Red	0.06194		0.251539
Pre-frontal cortex	P34064	Psma5	Proteasome subunit alpha type-5 OS=Rattus norvegicus OX=10116 GN=Psma5 PE=1 SV=1	Red	0.06201		0.251539
Pre-frontal cortex	P97697	Impa1	Inositol monophosphatase 1 OS=Rattus norvegicus OX=10116 GN=Impa1 PE=1 SV=2	Red	0.0622		0.37707
Pre-frontal cortex	Q64537	Capns1	Calpain small subunit 1 OS=Rattus norvegicus OX=10116 GN=Capns1 PE=1 SV=3	Red	0.06237		0.358454
Pre-frontal cortex	Q63450	Camk1	Calcium/calmodulin-dependent protein kinase type 1 OS=Rattus norvegicus OX=10116 GN=Camk1 PE=1 SV=2	Green	0.06368		-0.773996
Pre-frontal cortex	P37996	Arl3	ADP-ribosylation factor-like protein 3 OS=Rattus norvegicus OX=10116 GN=Arl3 PE=1 SV=2	Red	0.06404		0.454032
Pre-frontal cortex	P56571	ES1 protein homolog, mitochondrial OS=Rattus norvegicus OX=10116	ES1 protein homolog, mitochondrial OS=Rattus norvegicus OX=10116 PE=1 SV=2	Red	0.06496		0.340075
Pre-frontal cortex	F1LP90	Mink1	Misshapen-like kinase 1 OS=Rattus norvegicus OX=10116 GN=Mink1 PE=1 SV=2	Green	0.06573		0.862496
Pre-frontal cortex	Q68FR6	Eef1g	Elongation factor 1-gamma OS=Rattus norvegicus OX=10116 GN=Eef1g PE=2 SV=3	Red	0.06578		0.304006
Pre-frontal cortex	Q6Q0N1	Cndp2	Cytosolic non-specific dipeptidase OS=Rattus norvegicus OX=10116 GN=Cndp2 PE=1 SV=1	Red	0.06608		0.37707
Pre-frontal cortex	Q63507	Rpl14	60S ribosomal protein L14 OS=Rattus norvegicus OX=10116 GN=Rpl14 PE=1 SV=3	Red	0.06618		0.473931
Pre-frontal cortex	Q9Z1P2	Actn1	Alpha-actinin-1 OS=Rattus norvegicus OX=10116 GN=Actn1 PE=1 SV=1	Green	0.06641		-0.704872
Pre-frontal cortex	P63045	Vamp2	Vesicle-associated membrane protein 2 OS=Rattus norvegicus OX=10116 GN=Vamp2 PE=1 SV=2	Red	0.06652		0.494109
Pre-frontal cortex	Q9QX69	Lancl1	Glutathione S-transferase LANCL1 OS=Rattus norvegicus OX=10116 GN=Lancl1 PE=1 SV=2	Red	0.06671		0.286304
Pre-frontal cortex	Q99NA5	Idh3a	Isocitrate dehydrogenase [NAD] subunit alpha, mitochondrial OS=Rattus norvegicus OX=10116 GN=Idh3a PE=1 SV=1	Green	0.06773		-0.871844
Pre-frontal cortex	Q505J6	Slc25a18	Mitochondrial glutamate carrier 2 OS=Rattus norvegicus OX=10116 GN=Slc25a18 PE=2 SV=2	Green	0.06784		-1.5008
Pre-frontal cortex	P24090	Ahsg	Alpha-2-HS-glycoprotein OS=Rattus norvegicus OX=10116 GN=Ahsg PE=1 SV=2	Green	0.0687		-0.903038
Pre-frontal cortex	P21571	Atp5pf	ATP synthase-coupling factor 6, mitochondrial OS=Rattus norvegicus OX=10116 GN=Atp5pf PE=1 SV=1	Green	0.06876		-1.04963
Pre-frontal cortex	Q6IRK9	Cpq	Carboxypeptidase Q OS=Rattus norvegicus OX=10116 GN=Cpq PE=1 SV=1	Green	0.06886		3.32193
Pre-frontal cortex	Q63570	Psmc4	26S proteasome regulatory subunit 6B OS=Rattus norvegicus OX=10116 GN=Psmc4 PE=1 SV=1	Green	0.06887		0.666576
Pre-frontal cortex	B2GUZ5	Capza1	F-actin-capping protein subunit alpha-1 OS=Rattus norvegicus OX=10116 GN=Capza1 PE=1 SV=1	Green	0.06971		2.05889
Pre-frontal cortex	O09178	Ampd3	AMP deaminase 3 OS=Rattus norvegicus OX=10116 GN=Ampd3 PE=1 SV=2	Green	0.07004		1.21759
Pre-frontal cortex	O70593	Sgta	Small glutamine-rich tetratricopeptide repeat-containing protein alpha OS=Rattus norvegicus OX=10116 GN=Sgta PE=1 SV=1	Red	0.07062		0.358454
Pre-frontal cortex	Q9EPC6	Pfn2	Profilin-2 OS=Rattus norvegicus OX=10116 GN=Pfn2 PE=1 SV=3	Red	0.07082		0.473931
Pre-frontal cortex	O08838	Amph	Amphiphysin OS=Rattus norvegicus OX=10116 GN=Amph PE=1 SV=1	Red	0.07144		0.251539
Pre-frontal cortex	P09895	Rpl5	60S ribosomal protein L5 OS=Rattus norvegicus OX=10116 GN=Rpl5 PE=1 SV=3	Green	0.07154		0.643856
Pre-frontal cortex	P63245	Rack1	Receptor of activated protein C kinase 1 OS=Rattus norvegicus OX=10116 GN=Rack1 PE=1 SV=3	Red	0.07162		0.434403
Pre-frontal cortex	P05065	Aldoa	Fructose-bisphosphate aldolase A OS=Rattus norvegicus OX=10116 GN=Aldoa PE=1 SV=2	Red	0.07172		0.217591
Pre-frontal cortex	P62168	Ncs1	Neuronal calcium sensor 1 OS=Rattus norvegicus OX=10116 GN=Ncs1 PE=1 SV=2	Red	0.07205		0.358454
Pre-frontal cortex	P10860	Glud1	Glutamate dehydrogenase 1, mitochondrial OS=Rattus norvegicus OX=10116 GN=Glud1 PE=1 SV=2	Red	0.07216		-0.422233
Pre-frontal cortex	Q99MS0	Sec14l2	SEC14-like protein 2 OS=Rattus norvegicus OX=10116 GN=Sec14l2 PE=1 SV=1	Red	0.07358		-0.411426
Pre-frontal cortex	Q8R478	Wbp2	WW domain-binding protein 2 OS=Rattus norvegicus OX=10116 GN=Wbp2 PE=1 SV=1	Red	0.07359		0.434403
Pre-frontal cortex	Q9WVR7	Ppm1f	Protein phosphatase 1F OS=Rattus norvegicus OX=10116 GN=Ppm1f PE=2 SV=1	Green	0.07379		0.736966
Pre-frontal cortex	P04041	Gpx1	Glutathione peroxidase 1 OS=Rattus norvegicus OX=10116 GN=Gpx1 PE=1 SV=4	Green	0.07415		0.666576
Pre-frontal cortex	P63159	Hmgb1	High mobility group protein B1 OS=Rattus norvegicus OX=10116 GN=Hmgb1 PE=1 SV=2	Red	0.07441		0.37707
Pre-frontal cortex	P38656	Ssb	Lupus La protein homolog OS=Rattus norvegicus OX=10116 GN=Ssb PE=1 SV=1	Red	0.07441		0.454032
Pre-frontal cortex	Q62950	Crmp1	Dihydropyrimidinase-related protein 1 OS=Rattus norvegicus OX=10116 GN=Crmp1 PE=1 SV=1	Red	0.07468		0.200913
Pre-frontal cortex	Q6AXQ0	Sae1	SUMO-activating enzyme subunit 1 OS=Rattus norvegicus OX=10116 GN=Sae1 PE=2 SV=1	Red	0.07586		0.514573
Pre-frontal cortex	Q8K4M9	Osbpl1a	Oxysterol-binding protein-related protein 1 OS=Rattus norvegicus OX=10116 GN=Osbpl1a PE=1 SV=1	Red	0.07643		-0.321928
Pre-frontal cortex	P19527	Nefl	Neurofilament light polypeptide OS=Rattus norvegicus OX=10116 GN=Nefl PE=1 SV=3	Red	0.07689		0.514573
Pre-frontal cortex	Q63413	Ddx39b	Spliceosome RNA helicase Ddx39b OS=Rattus norvegicus OX=10116 GN=Ddx39b PE=2 SV=3	Red	0.07702		0.395929
Pre-frontal cortex	P50904	Rasa1	Ras GTPase-activating protein 1 OS=Rattus norvegicus OX=10116 GN=Rasa1 PE=1 SV=1	Green	0.07747		2.47393
Pre-frontal cortex	P17764	Acat1	Acetyl-CoA acetyltransferase, mitochondrial OS=Rattus norvegicus OX=10116 GN=Acat1 PE=1 SV=1	Red	0.07884		0.514573
Pre-frontal cortex	Q9JHU0	Dpysl5	Dihydropyrimidinase-related protein 5 OS=Rattus norvegicus OX=10116 GN=Dpysl5 PE=1 SV=1	Red	0.07985		-0.226509
Pre-frontal cortex	Q5U2Z3	Nap1l4	Nucleosome assembly protein 1-like 4 OS=Rattus norvegicus OX=10116 GN=Nap1l4 PE=1 SV=1	Red	0.08039		0.358454
Pre-frontal cortex	P62907	Rpl10a	60S ribosomal protein L10a OS=Rattus norvegicus OX=10116 GN=Rpl10a PE=1 SV=2	Red	0.08103		0.494109
Pre-frontal cortex	Q62696	Dlg1	Disks large homolog 1 OS=Rattus norvegicus OX=10116 GN=Dlg1 PE=1 SV=1	Green	0.08135		0.535332
Pre-frontal cortex	P19468	Gclc	Glutamate--cysteine ligase catalytic subunit OS=Rattus norvegicus OX=10116 GN=Gclc PE=1 SV=2	Green	0.08135		0.736966
Pre-frontal cortex	Q4G009	Mcts1	Malignant T-cell-amplified sequence 1 OS=Rattus norvegicus OX=10116 GN=Mcts1 PE=2 SV=1	Red	0.082		-0.526069
Pre-frontal cortex	P09527	Rab7a	Ras-related protein Rab-7a OS=Rattus norvegicus OX=10116 GN=Rab7a PE=1 SV=2	Red	0.08221		0.251539
Pre-frontal cortex	Q91V33	Khdrbs1	KH domain-containing, RNA-binding, signal transduction-associated protein 1 OS=Rattus norvegicus OX=10116 GN=Khdrbs1 PE=1 SV=1	Green	0.08271		0.535332
Pre-frontal cortex	Q5XIT1	Mapre3	Microtubule-associated protein RP/EB family member 3 OS=Rattus norvegicus OX=10116 GN=Mapre3 PE=1 SV=1	Red	0.08324		-0.250962
Pre-frontal cortex	Q5FVC2	Arhgef2	Rho guanine nucleotide exchange factor 2 OS=Rattus norvegicus OX=10116 GN=Arhgef2 PE=1 SV=1	Green	0.08356		-0.704872
Pre-frontal cortex	Q9WTV5	Psmd9	26S proteasome non-ATPase regulatory subunit 9 OS=Rattus norvegicus OX=10116 GN=Psmd9 PE=1 SV=1	Red	0.08382		0.535332
Pre-frontal cortex	P85108	Tubb2a	Tubulin beta-2A chain OS=Rattus norvegicus OX=10116 GN=Tubb2a PE=1 SV=1	Red	0.08398		0.234465
Pre-frontal cortex	Q6IMY8	Hnrnpu	Heterogeneous nuclear ribonucleoprotein U OS=Rattus norvegicus OX=10116 GN=Hnrnpu PE=1 SV=1	Red	0.08426		-0.495695
Pre-frontal cortex	P68255	Ywhaq	14-3-3 protein theta OS=Rattus norvegicus OX=10116 GN=Ywhaq PE=1 SV=1	Red	0.08469		0.234465
Pre-frontal cortex	B5DF89	Cul3	Cullin-3 OS=Rattus norvegicus OX=10116 GN=Cul3 PE=1 SV=2	Red	0.08561		0.434403
Pre-frontal cortex	P84100	Rpl19	60S ribosomal protein L19 OS=Rattus norvegicus OX=10116 GN=Rpl19 PE=1 SV=1	Red	0.08671		0.321928
Pre-frontal cortex	Q5XI72	Eif4h	Eukaryotic translation initiation factor 4H OS=Rattus norvegicus OX=10116 GN=Eif4h PE=1 SV=1	Red	0.08675		0.395929
Pre-frontal cortex	Q6I7R3	Isoc1	Isochorismatase domain-containing protein 1 OS=Rattus norvegicus OX=10116 GN=Isoc1 PE=1 SV=1	Green	0.08724		0.810966
Pre-frontal cortex	P12368	Prkar2a	cAMP-dependent protein kinase type II-alpha regulatory subunit OS=Rattus norvegicus OX=10116 GN=Prkar2a PE=1 SV=4	Red	0.08726		0.454032
Pre-frontal cortex	P11240	Cox5a	Cytochrome c oxidase subunit 5A, mitochondrial OS=Rattus norvegicus OX=10116 GN=Cox5a PE=1 SV=1	Green	0.08741		-1.28688
Pre-frontal cortex	Q5RJR2	Twf1	Twinfilin-1 OS=Rattus norvegicus OX=10116 GN=Twf1 PE=1 SV=1	Red	0.0879		0.454032
Pre-frontal cortex	Q05140-2	Snap91	Isoform 2 of Clathrin coat assembly protein AP180 OS=Rattus norvegicus OX=10116 GN=Snap91	Red	0.08855		0.454032
Pre-frontal cortex	P06685	Atp1a1	Sodium/potassium-transporting ATPase subunit alpha-1 OS=Rattus norvegicus OX=10116 GN=Atp1a1 PE=1 SV=1	Green	0.0889		-1.1635
Pre-frontal cortex	Q9JK25	Clip1	CAP-Gly domain-containing linker protein 1 OS=Rattus norvegicus OX=10116 GN=Clip1 PE=1 SV=2	Green	0.08895		0.836501
Pre-frontal cortex	P47709	Rph3a	Rabphilin-3A OS=Rattus norvegicus OX=10116 GN=Rph3a PE=1 SV=1	Red	0.08906		-0.31034
Pre-frontal cortex	P50878	Rpl4	60S ribosomal protein L4 OS=Rattus norvegicus OX=10116 GN=Rpl4 PE=1 SV=3	Red	0.09098		0.37707
Pre-frontal cortex	P28818	Rasgrf1	Ras-specific guanine nucleotide-releasing factor 1 OS=Rattus norvegicus OX=10116 GN=Rasgrf1 PE=1 SV=1	Red	0.09116		0.535332
Pre-frontal cortex	Q9QXQ0	Actn4	Alpha-actinin-4 OS=Rattus norvegicus OX=10116 GN=Actn4 PE=1 SV=2	Green	0.09144		-0.565597
Pre-frontal cortex	P23711	Hmox2	Heme oxygenase 2 OS=Rattus norvegicus OX=10116 GN=Hmox2 PE=1 SV=1	Green	0.09243		0.836501
Pre-frontal cortex	Q5FVI4	Cend1	Cell cycle exit and neuronal differentiation protein 1 OS=Rattus norvegicus OX=10116 GN=Cend1 PE=1 SV=1	Red	0.09283		-0.454176
Pre-frontal cortex	P22062	Pcmt1	Protein-L-isoaspartate(D-aspartate) O-methyltransferase OS=Rattus norvegicus OX=10116 GN=Pcmt1 PE=1 SV=2	Red	0.093		0.200913
Pre-frontal cortex	O35263	Pafah1b3	Platelet-activating factor acetylhydrolase IB subunit alpha1 OS=Rattus norvegicus OX=10116 GN=Pafah1b3 PE=1 SV=1	Green	0.09316		2.73697
Pre-frontal cortex	P05426	Rpl7	60S ribosomal protein L7 OS=Rattus norvegicus OX=10116 GN=Rpl7 PE=1 SV=2	Red	0.09372		0.358454
Pre-frontal cortex	P24050	Rps5	40S ribosomal protein S5 OS=Rattus norvegicus OX=10116 GN=Rps5 PE=1 SV=3	Red	0.09375		0.321928
Pre-frontal cortex	P50408	Atp6v1f	V-type proton ATPase subunit F OS=Rattus norvegicus OX=10116 GN=Atp6v1f PE=1 SV=1	Red	0.09464		0.251539
Pre-frontal cortex	Q6P6R2	Dld	Dihydrolipoyl dehydrogenase, mitochondrial OS=Rattus norvegicus OX=10116 GN=Dld PE=1 SV=1	Red	0.09491		0.304006
Pre-frontal cortex	Q91XU8	Cds2	Phosphatidate cytidylyltransferase 2 OS=Rattus norvegicus OX=10116 GN=Cds2 PE=1 SV=1	Green	0.09545		1.73697
Pre-frontal cortex	P11980-2	Pkm	Isoform M2 of Pyruvate kinase PKM OS=Rattus norvegicus OX=10116 GN=Pkm	Red	0.09682		0.514573
Pre-frontal cortex	P12839	Nefm	Neurofilament medium polypeptide OS=Rattus norvegicus OX=10116 GN=Nefm PE=1 SV=4	Green	0.09734		0.761213
Pre-frontal cortex	Q5PQN0	Ncald	Neurocalcin-delta OS=Rattus norvegicus OX=10116 GN=Ncald PE=1 SV=3	Red	0.09844		-0.485427
Pre-frontal cortex	P09606	Glul	Glutamine synthetase OS=Rattus norvegicus OX=10116 GN=Glul PE=1 SV=3	Red	0.09882		0.184425
Pre-frontal cortex	P18484	Ap2a2	AP-2 complex subunit alpha-2 OS=Rattus norvegicus OX=10116 GN=Ap2a2 PE=1 SV=3	Red	0.09986		0.415037
Pre-frontal cortex	P17425	Hmgcs1	Hydroxymethylglutaryl-CoA synthase, cytoplasmic OS=Rattus norvegicus OX=10116 GN=Hmgcs1 PE=1 SV=1	Green	0.0999		-0.659925
Pre-frontal cortex	Q9Z1A6	Hdlbp	Vigilin OS=Rattus norvegicus OX=10116 GN=Hdlbp PE=1 SV=1	Green	0.1003		2.32193
Pre-frontal cortex	P84076	Hpca	Neuron-specific calcium-binding protein hippocalcin OS=Rattus norvegicus OX=10116 GN=Hpca PE=1 SV=2	Green	0.10064		-0.604071
Pre-frontal cortex	P27605	Hprt1	Hypoxanthine-guanine phosphoribosyltransferase OS=Rattus norvegicus OX=10116 GN=Hprt1 PE=1 SV=1	Red	0.10064		0.168123
Pre-frontal cortex	P11517	Hemoglobin subunit beta-2 OS=Rattus norvegicus OX=10116	Hemoglobin subunit beta-2 OS=Rattus norvegicus OX=10116 PE=1 SV=2	Red	0.10069		-0.389567
Pre-frontal cortex	Q32Q06	Ap1m1	AP-1 complex subunit mu-1 OS=Rattus norvegicus OX=10116 GN=Ap1m1 PE=1 SV=3	Green	0.10101		-0.823749
Pre-frontal cortex	Q80W98	Sgtb	Small glutamine-rich tetratricopeptide repeat-containing protein beta OS=Rattus norvegicus OX=10116 GN=Sgtb PE=1 SV=1	Green	0.1026		-0.887525
Pre-frontal cortex	P19511	Atp5pb	ATP synthase F(0) complex subunit B1, mitochondrial OS=Rattus norvegicus OX=10116 GN=Atp5pb PE=1 SV=1	Green	0.10278		-0.879706
Pre-frontal cortex	Q641Z6	Ehd1	EH domain-containing protein 1 OS=Rattus norvegicus OX=10116 GN=Ehd1 PE=1 SV=1	Green	0.10301		1.25154
Pre-frontal cortex	P52873	Pc	Pyruvate carboxylase, mitochondrial OS=Rattus norvegicus OX=10116 GN=Pc PE=1 SV=2	Red	0.10402		-0.214125
Pre-frontal cortex	P60825	Cirbp	Cold-inducible RNA-binding protein OS=Rattus norvegicus OX=10116 GN=Cirbp PE=2 SV=1	Green	0.10422		0.862496
Pre-frontal cortex	G3V9T7	Get3	ATPase Get3 OS=Rattus norvegicus OX=10116 GN=Get3 PE=1 SV=1	Red	0.1043		-0.356144
Pre-frontal cortex	O08679	Mark2	Serine/threonine-protein kinase MARK2 OS=Rattus norvegicus OX=10116 GN=Mark2 PE=1 SV=1	Green	0.10475		0.68966
Pre-frontal cortex	P48768	Slc8a2	Sodium/calcium exchanger 2 OS=Rattus norvegicus OX=10116 GN=Slc8a2 PE=1 SV=1	Green	0.10484		-1.83996
Pre-frontal cortex	P05370	G6pdx	Glucose-6-phosphate 1-dehydrogenase OS=Rattus norvegicus OX=10116 GN=G6pdx PE=1 SV=3	Green	0.10505		1
Pre-frontal cortex	P70470	Lypla1	Acyl-protein thioesterase 1 OS=Rattus norvegicus OX=10116 GN=Lypla1 PE=1 SV=1	Green	0.10521		-1.59932
Pre-frontal cortex	Q8VIJ5	Oga	Protein O-GlcNAcase OS=Rattus norvegicus OX=10116 GN=Oga PE=1 SV=1	Green	0.10539		0.915936
Pre-frontal cortex	Q75Q39	Tomm70	Mitochondrial import receptor subunit TOM70 OS=Rattus norvegicus OX=10116 GN=Tomm70 PE=1 SV=1	Green	0.10619		3.8365
Pre-frontal cortex	D3ZQG6	Trim2	Tripartite motif-containing protein 2 OS=Rattus norvegicus OX=10116 GN=Trim2 PE=1 SV=2	Red	0.10675		0.514573
Pre-frontal cortex	P13638	Atp1b2	Sodium/potassium-transporting ATPase subunit beta-2 OS=Rattus norvegicus OX=10116 GN=Atp1b2 PE=1 SV=1	Green	0.10677		-1.48543
Pre-frontal cortex	B2GV06	Oxct1	Succinyl-CoA:3-ketoacid coenzyme A transferase 1, mitochondrial OS=Rattus norvegicus OX=10116 GN=Oxct1 PE=1 SV=1	Red	0.10677		-0.333424
Pre-frontal cortex	Q641Y5	Atg7	Ubiquitin-like modifier-activating enzyme ATG7 OS=Rattus norvegicus OX=10116 GN=Atg7 PE=2 SV=1	Green	0.10932		-4.14568
Pre-frontal cortex	P43244	Matr3	Matrin-3 OS=Rattus norvegicus OX=10116 GN=Matr3 PE=1 SV=2	Red	0.10955		0.395929
Pre-frontal cortex	O70277	Trim3	Tripartite motif-containing protein 3 OS=Rattus norvegicus OX=10116 GN=Trim3 PE=1 SV=1	Red	0.10959		0.473931
Pre-frontal cortex	F1M0Z1	Trio	Triple functional domain protein OS=Rattus norvegicus OX=10116 GN=Trio PE=1 SV=4	Green	0.11037		-1.02148
Pre-frontal cortex	P51583	Paics	Multifunctional protein ADE2 OS=Rattus norvegicus OX=10116 GN=Paics PE=1 SV=3	Red	0.11113		0.494109
Pre-frontal cortex	Q66X93	Snd1	Staphylococcal nuclease domain-containing protein 1 OS=Rattus norvegicus OX=10116 GN=Snd1 PE=1 SV=1	Green	0.11123		1.55639
Pre-frontal cortex	P09495	Tpm4	Tropomyosin alpha-4 chain OS=Rattus norvegicus OX=10116 GN=Tpm4 PE=1 SV=3	Green	0.11229		0.862496
Pre-frontal cortex	P01026	C3	Complement C3 OS=Rattus norvegicus OX=10116 GN=C3 PE=1 SV=3	Green	0.11295		-2.25399
Pre-frontal cortex	P47860	Pfkp	ATP-dependent 6-phosphofructokinase, platelet type OS=Rattus norvegicus OX=10116 GN=Pfkp PE=1 SV=2	Red	0.11319		0.168123
Pre-frontal cortex	Q9WVC0	Septin7	Septin-7 OS=Rattus norvegicus OX=10116 GN=Septin7 PE=1 SV=1	Red	0.11347		0.340075
Pre-frontal cortex	Q6Q629	Dpp10	Inactive dipeptidyl peptidase 10 OS=Rattus norvegicus OX=10116 GN=Dpp10 PE=1 SV=1	Green	0.11365		-1.96717
Pre-frontal cortex	D4AAT7	Naxd	ATP-dependent (S)-NAD(P)H-hydrate dehydratase OS=Rattus norvegicus OX=10116 GN=Naxd PE=3 SV=1	Green	0.11459		0.836501
Pre-frontal cortex	Q68FW9	Cops3	COP9 signalosome complex subunit 3 OS=Rattus norvegicus OX=10116 GN=Cops3 PE=1 SV=1	Red	0.11555		0.340075
Pre-frontal cortex	P10719	Atp5f1b	ATP synthase subunit beta, mitochondrial OS=Rattus norvegicus OX=10116 GN=Atp5f1b PE=1 SV=2	Red	0.11734		-0.286881
Pre-frontal cortex	P20650	Ppm1a	Protein phosphatase 1A OS=Rattus norvegicus OX=10116 GN=Ppm1a PE=1 SV=1	Green	0.11743		1.21759
Pre-frontal cortex	P83732	Rpl24	60S ribosomal protein L24 OS=Rattus norvegicus OX=10116 GN=Rpl24 PE=2 SV=1	Red	0.11746		0.473931
Pre-frontal cortex	P55067	Ncan	Neurocan core protein OS=Rattus norvegicus OX=10116 GN=Ncan PE=1 SV=1	Red	0.11768		0.395929
Pre-frontal cortex	P61983	Ywhag	14-3-3 protein gamma OS=Rattus norvegicus OX=10116 GN=Ywhag PE=1 SV=2	Red	0.11926		0.168123
Pre-frontal cortex	P06686	Atp1a2	Sodium/potassium-transporting ATPase subunit alpha-2 OS=Rattus norvegicus OX=10116 GN=Atp1a2 PE=1 SV=1	Green	0.11955		-0.887525
Pre-frontal cortex	P70566	Tmod2	Tropomodulin-2 OS=Rattus norvegicus OX=10116 GN=Tmod2 PE=1 SV=1	Green	0.1196		0.761213
Pre-frontal cortex	P69897	Tubb5	Tubulin beta-5 chain OS=Rattus norvegicus OX=10116 GN=Tubb5 PE=1 SV=1	Red	0.11973		0.251539
Pre-frontal cortex	P00787	Ctsb	Cathepsin B OS=Rattus norvegicus OX=10116 GN=Ctsb PE=1 SV=2	Green	0.1198		1.12029
Pre-frontal cortex	P07483	Fabp3	Fatty acid-binding protein, heart OS=Rattus norvegicus OX=10116 GN=Fabp3 PE=1 SV=2	Red	0.11997		-0.163499
Pre-frontal cortex	Q6NYB7	Rab1A	Ras-related protein Rab-1A OS=Rattus norvegicus OX=10116 GN=Rab1A PE=1 SV=3	Red	0.12072		-0.333424
Pre-frontal cortex	Q9JLJ3	Aldh9a1	4-trimethylaminobutyraldehyde dehydrogenase OS=Rattus norvegicus OX=10116 GN=Aldh9a1 PE=1 SV=1	Red	0.12109		0.251539
Pre-frontal cortex	P36201	Crip2	Cysteine-rich protein 2 OS=Rattus norvegicus OX=10116 GN=Crip2 PE=2 SV=1	Red	0.123		0.434403
Pre-frontal cortex	Q08602	Rabggta	Geranylgeranyl transferase type-2 subunit alpha OS=Rattus norvegicus OX=10116 GN=Rabggta PE=1 SV=1	Green	0.12315		-1.1177
Pre-frontal cortex	P38983	Rpsa	40S ribosomal protein SA OS=Rattus norvegicus OX=10116 GN=Rpsa PE=1 SV=3	Red	0.12329		0.268817
Pre-frontal cortex	P35427	Rpl13a	60S ribosomal protein L13a OS=Rattus norvegicus OX=10116 GN=Rpl13a PE=1 SV=2	Red	0.12363		0.358454
Pre-frontal cortex	Q5U1Z0	Rab3gap2	Rab3 GTPase-activating protein non-catalytic subunit OS=Rattus norvegicus OX=10116 GN=Rab3gap2 PE=1 SV=2	Green	0.12389		1.2863
Pre-frontal cortex	Q5U2Q7	Etf1	Eukaryotic peptide chain release factor subunit 1 OS=Rattus norvegicus OX=10116 GN=Etf1 PE=2 SV=3	Green	0.1241		2.8365
Pre-frontal cortex	F1LMZ8	Psmd11	26S proteasome non-ATPase regulatory subunit 11 OS=Rattus norvegicus OX=10116 GN=Psmd11 PE=1 SV=2	Red	0.12423		0.286304
Pre-frontal cortex	P62859	Rps28	40S ribosomal protein S28 OS=Rattus norvegicus OX=10116 GN=Rps28 PE=1 SV=1	Red	0.12429		0.268817
Pre-frontal cortex	P35465	Pak1	Serine/threonine-protein kinase PAK 1 OS=Rattus norvegicus OX=10116 GN=Pak1 PE=1 SV=3	Red	0.12431		-0.356144
Pre-frontal cortex	P05369	Fdps	Farnesyl pyrophosphate synthase OS=Rattus norvegicus OX=10116 GN=Fdps PE=2 SV=2	Green	0.12753		-1.83188
Pre-frontal cortex	P84092	Ap2m1	AP-2 complex subunit mu OS=Rattus norvegicus OX=10116 GN=Ap2m1 PE=1 SV=1	Red	0.1279		0.358454
Pre-frontal cortex	Q4KMA2	Rad23b	UV excision repair protein RAD23 homolog B OS=Rattus norvegicus OX=10116 GN=Rad23b PE=1 SV=1	Red	0.12819		0.286304
Pre-frontal cortex	Q6AY30	Sccpdh	Saccharopine dehydrogenase-like oxidoreductase OS=Rattus norvegicus OX=10116 GN=Sccpdh PE=1 SV=1	Green	0.12854		-0.879706
Pre-frontal cortex	O35244	Prdx6	Peroxiredoxin-6 OS=Rattus norvegicus OX=10116 GN=Prdx6 PE=1 SV=3	Red	0.12865		0.286304
Pre-frontal cortex	P63249	Pkia	cAMP-dependent protein kinase inhibitor alpha OS=Rattus norvegicus OX=10116 GN=Pkia PE=1 SV=2	Red	0.13049		-0.422233
Pre-frontal cortex	P11232	Txn	Thioredoxin OS=Rattus norvegicus OX=10116 GN=Txn PE=1 SV=2	Red	0.13075		0.234465
Pre-frontal cortex	Q5BKC9	Ngef	Ephexin-1 OS=Rattus norvegicus OX=10116 GN=Ngef PE=1 SV=2	Green	0.1309		-0.678072
Pre-frontal cortex	P62912	Rpl32	60S ribosomal protein L32 OS=Rattus norvegicus OX=10116 GN=Rpl32 PE=1 SV=2	Red	0.13171		0.454032
Pre-frontal cortex	P19139	Csnk2a1	Casein kinase II subunit alpha OS=Rattus norvegicus OX=10116 GN=Csnk2a1 PE=1 SV=2	Red	0.13178		0.136062
Pre-frontal cortex	P61354	Rpl27	60S ribosomal protein L27 OS=Rattus norvegicus OX=10116 GN=Rpl27 PE=2 SV=2	Red	0.13178		0.321928
Pre-frontal cortex	P49242	Rps3a	40S ribosomal protein S3a OS=Rattus norvegicus OX=10116 GN=Rps3a PE=1 SV=2	Red	0.13187		0.37707
Pre-frontal cortex	A0JPJ7	Ola1	Obg-like ATPase 1 OS=Rattus norvegicus OX=10116 GN=Ola1 PE=2 SV=1	Red	0.13207		0.321928
Pre-frontal cortex	P42346	Mtor	Serine/threonine-protein kinase mTOR OS=Rattus norvegicus OX=10116 GN=Mtor PE=1 SV=1	Green	0.13238		-0.948601
Pre-frontal cortex	P62483	Kcnab2	Voltage-gated potassium channel subunit beta-2 OS=Rattus norvegicus OX=10116 GN=Kcnab2 PE=1 SV=1	Green	0.1333		-1.22033
Pre-frontal cortex	Q62951	Dpysl4	Dihydropyrimidinase-related protein 4 (Fragment) OS=Rattus norvegicus OX=10116 GN=Dpysl4 PE=1 SV=1	Red	0.13357		-0.411426
Pre-frontal cortex	P18422	Psma3	Proteasome subunit alpha type-3 OS=Rattus norvegicus OX=10116 GN=Psma3 PE=1 SV=3	Red	0.1338		0.217591
Pre-frontal cortex	O08730	Gyg1	Glycogenin-1 OS=Rattus norvegicus OX=10116 GN=Gyg1 PE=2 SV=4	Red	0.13424		0.434403
Pre-frontal cortex	O35264	Pafah1b2	Platelet-activating factor acetylhydrolase IB subunit alpha2 OS=Rattus norvegicus OX=10116 GN=Pafah1b2 PE=1 SV=1	Red	0.13438		0.234465
Pre-frontal cortex	Q641Y8	Ddx1	ATP-dependent RNA helicase DDX1 OS=Rattus norvegicus OX=10116 GN=Ddx1 PE=1 SV=1	Red	0.13473		0.358454
Pre-frontal cortex	Q5U211	Snx3	Sorting nexin-3 OS=Rattus norvegicus OX=10116 GN=Snx3 PE=1 SV=1	Red	0.13539		0.37707
Pre-frontal cortex	O88989	Mdh1	Malate dehydrogenase, cytoplasmic OS=Rattus norvegicus OX=10116 GN=Mdh1 PE=1 SV=3	Red	0.1362		0.152003
Pre-frontal cortex	Q64303	Pak2	Serine/threonine-protein kinase PAK 2 OS=Rattus norvegicus OX=10116 GN=Pak2 PE=1 SV=1	Green	0.13636		0.736966
Pre-frontal cortex	P07895	Sod2	Superoxide dismutase [Mn], mitochondrial OS=Rattus norvegicus OX=10116 GN=Sod2 PE=1 SV=2	Red	0.1365		-0.275007
Pre-frontal cortex	P11442	Cltc	Clathrin heavy chain 1 OS=Rattus norvegicus OX=10116 GN=Cltc PE=1 SV=3	Red	0.13789		0.136062
Pre-frontal cortex	Q9QYU4	Crym	Ketimine reductase mu-crystallin OS=Rattus norvegicus OX=10116 GN=Crym PE=1 SV=1	Red	0.1379		-0.189034
Pre-frontal cortex	O88767	Park7	Parkinson disease protein 7 homolog OS=Rattus norvegicus OX=10116 GN=Park7 PE=1 SV=1	Red	0.13818		0.217591
Pre-frontal cortex	P62914	Rpl11	60S ribosomal protein L11 OS=Rattus norvegicus OX=10116 GN=Rpl11 PE=1 SV=2	Red	0.13831		0.304006
Pre-frontal cortex	P63319	Prkcg	Protein kinase C gamma type OS=Rattus norvegicus OX=10116 GN=Prkcg PE=1 SV=1	Green	0.14001		-0.722466
Pre-frontal cortex	P62828	Ran	GTP-binding nuclear protein Ran OS=Rattus norvegicus OX=10116 GN=Ran PE=1 SV=3	Red	0.14039		0.217591
Pre-frontal cortex	Q5I0D5	Lhpp	Phospholysine phosphohistidine inorganic pyrophosphate phosphatase OS=Rattus norvegicus OX=10116 GN=Lhpp PE=2 SV=1	Red	0.14052		0.321928
Pre-frontal cortex	P62275	Rps29	40S ribosomal protein S29 OS=Rattus norvegicus OX=10116 GN=Rps29 PE=1 SV=2	Green	0.14068		0.68966
Pre-frontal cortex	Q3B8Q2	Eif4a3	Eukaryotic initiation factor 4A-III OS=Rattus norvegicus OX=10116 GN=Eif4a3 PE=1 SV=1	Green	0.14161		-1.17632
Pre-frontal cortex	P19103	Ppp1r1a	Protein phosphatase 1 regulatory subunit 1A OS=Rattus norvegicus OX=10116 GN=Ppp1r1a PE=1 SV=1	Red	0.14195		0.535332
Pre-frontal cortex	Q63065	Pdk1	[Pyruvate dehydrogenase (acetyl-transferring)] kinase isozyme 1, mitochondrial OS=Rattus norvegicus OX=10116 GN=Pdk1 PE=1 SV=1	Green	0.14255		-1.23879
Pre-frontal cortex	P62138	Ppp1ca	Serine/threonine-protein phosphatase PP1-alpha catalytic subunit OS=Rattus norvegicus OX=10116 GN=Ppp1ca PE=1 SV=1	Green	0.14346		-2.95233
Pre-frontal cortex	O35867	Ppp1r9a	Neurabin-1 OS=Rattus norvegicus OX=10116 GN=Ppp1r9a PE=1 SV=1	Green	0.14406		-0.871844
Pre-frontal cortex	Q9ESB5	Necab1	N-terminal EF-hand calcium-binding protein 1 OS=Rattus norvegicus OX=10116 GN=Necab1 PE=1 SV=1	Red	0.14553		-0.443607
Pre-frontal cortex	Q62718	Ntm	Neurotrimin OS=Rattus norvegicus OX=10116 GN=Ntm PE=1 SV=1	Green	0.14585		-1.07724
Pre-frontal cortex	P26772	Hspe1	10 kDa heat shock protein, mitochondrial OS=Rattus norvegicus OX=10116 GN=Hspe1 PE=1 SV=3	Red	0.14624		0.217591
Pre-frontal cortex	P13221	Got1	Aspartate aminotransferase, cytoplasmic OS=Rattus norvegicus OX=10116 GN=Got1 PE=1 SV=3	Red	0.14642		0.268817
Pre-frontal cortex	Q5M9G3	Caprin1	Caprin-1 OS=Rattus norvegicus OX=10116 GN=Caprin1 PE=1 SV=2	Red	0.14648		0.514573
Pre-frontal cortex	O08873	Madd	MAP kinase-activating death domain protein OS=Rattus norvegicus OX=10116 GN=Madd PE=1 SV=1	Red	0.14671		-0.356144
Pre-frontal cortex	P13668	Stmn1	Stathmin OS=Rattus norvegicus OX=10116 GN=Stmn1 PE=1 SV=2	Red	0.14684		-0.432959
Pre-frontal cortex	Q6PEC4	Skp1	S-phase kinase-associated protein 1 OS=Rattus norvegicus OX=10116 GN=Skp1 PE=1 SV=3	Red	0.14728		0.168123
Pre-frontal cortex	O55156	Clip2	CAP-Gly domain-containing linker protein 2 OS=Rattus norvegicus OX=10116 GN=Clip2 PE=1 SV=1	Green	0.14825		0.915936
Pre-frontal cortex	Q78P75	Dynll2	Dynein light chain 2, cytoplasmic OS=Rattus norvegicus OX=10116 GN=Dynll2 PE=1 SV=1	Green	0.1486		-0.62293
Pre-frontal cortex	Q4KLP0	Dhtkd1	Probable 2-oxoglutarate dehydrogenase E1 component DHKTD1, mitochondrial OS=Rattus norvegicus OX=10116 GN=Dhtkd1 PE=2 SV=1	Red	0.14899		-0.454176
Pre-frontal cortex	D4A4T9	Chordc1	Cysteine and histidine-rich domain-containing protein 1 OS=Rattus norvegicus OX=10116 GN=Chordc1 PE=3 SV=1	Red	0.14902		0.473931
Pre-frontal cortex	P04905	Gstm1	Glutathione S-transferase Mu 1 OS=Rattus norvegicus OX=10116 GN=Gstm1 PE=1 SV=2	Red	0.14912		-0.176323
Pre-frontal cortex	Q5M7U6	Actr2	Actin-related protein 2 OS=Rattus norvegicus OX=10116 GN=Actr2 PE=2 SV=1	Red	0.14946		0.0740006
Pre-frontal cortex	P61589	Rhoa	Transforming protein RhoA OS=Rattus norvegicus OX=10116 GN=Rhoa PE=1 SV=1	Red	0.1505		0.268817
Pre-frontal cortex	P04182	Oat	Ornithine aminotransferase, mitochondrial OS=Rattus norvegicus OX=10116 GN=Oat PE=1 SV=1	Red	0.15056		0.251539
Pre-frontal cortex	P97546	Nptn	Neuroplastin OS=Rattus norvegicus OX=10116 GN=Nptn PE=1 SV=2	Green	0.15071		-1.09085
Pre-frontal cortex	D4A631	Arfgef1	Brefeldin A-inhibited guanine nucleotide-exchange protein 1 OS=Rattus norvegicus OX=10116 GN=Arfgef1 PE=1 SV=1	Green	0.15101		-1.29278
Pre-frontal cortex	Q06647	Atp5po	ATP synthase subunit O, mitochondrial OS=Rattus norvegicus OX=10116 GN=Atp5po PE=1 SV=1	Green	0.1512		-0.847997
Pre-frontal cortex	P47942	Dpysl2	Dihydropyrimidinase-related protein 2 OS=Rattus norvegicus OX=10116 GN=Dpysl2 PE=1 SV=1	Red	0.1524		0.120294
Pre-frontal cortex	Q99ML5	Pcyox1	Prenylcysteine oxidase OS=Rattus norvegicus OX=10116 GN=Pcyox1 PE=1 SV=1	Green	0.15293		-0.584963
Pre-frontal cortex	P60522	Gabarapl2	Gamma-aminobutyric acid receptor-associated protein-like 2 OS=Rattus norvegicus OX=10116 GN=Gabarapl2 PE=3 SV=1	Red	0.15357		0.577767
Pre-frontal cortex	P29266	Hibadh	3-hydroxyisobutyrate dehydrogenase, mitochondrial OS=Rattus norvegicus OX=10116 GN=Hibadh PE=1 SV=3	Red	0.15386		0.286304
Pre-frontal cortex	P62752	Rpl23a	60S ribosomal protein L23a OS=Rattus norvegicus OX=10116 GN=Rpl23a PE=2 SV=1	Green	0.15513		-1.63691
Pre-frontal cortex	Q6P502	Cct3	T-complex protein 1 subunit gamma OS=Rattus norvegicus OX=10116 GN=Cct3 PE=1 SV=1	Red	0.15574		0.184425
Pre-frontal cortex	P19686	Gucy1a1	Guanylate cyclase soluble subunit alpha-1 OS=Rattus norvegicus OX=10116 GN=Gucy1a1 PE=1 SV=1	Green	0.15578		0.666576
Pre-frontal cortex	Q64620	Ppp6c	Serine/threonine-protein phosphatase 6 catalytic subunit OS=Rattus norvegicus OX=10116 GN=Ppp6c PE=2 SV=2	Green	0.15582		-0.678072
Pre-frontal cortex	O55166	Vps52	Vacuolar protein sorting-associated protein 52 homolog OS=Rattus norvegicus OX=10116 GN=Vps52 PE=1 SV=2	Green	0.15678		-4.44162
Pre-frontal cortex	Q9QZA2	Pdcd6ip	Programmed cell death 6-interacting protein OS=Rattus norvegicus OX=10116 GN=Pdcd6ip PE=1 SV=2	Green	0.15799		-0.799087
Pre-frontal cortex	P10362	Scg2	Secretogranin-2 OS=Rattus norvegicus OX=10116 GN=Scg2 PE=1 SV=1	Red	0.15814		0.556393
Pre-frontal cortex	P49088	Asns	Asparagine synthetase [glutamine-hydrolyzing] OS=Rattus norvegicus OX=10116 GN=Asns PE=2 SV=3	Red	0.15883		0.556393
Pre-frontal cortex	F1M5N7	Kif21b	Kinesin-like protein KIF21B OS=Rattus norvegicus OX=10116 GN=Kif21b PE=1 SV=2	Red	0.15902		0.415037
Pre-frontal cortex	P85971	Pgls	6-phosphogluconolactonase OS=Rattus norvegicus OX=10116 GN=Pgls PE=1 SV=1	Red	0.15932		0.268817
Pre-frontal cortex	Q5XHY5	Tars1	Threonine--tRNA ligase 1, cytoplasmic OS=Rattus norvegicus OX=10116 GN=Tars1 PE=1 SV=1	Red	0.16168		0.37707
Pre-frontal cortex	Q5BK56	Gstm4	Glutathione S-transferase Mu 4 OS=Rattus norvegicus OX=10116 GN=Gstm4 PE=2 SV=1	Red	0.16223		0.454032
Pre-frontal cortex	P47858	Pfkm	ATP-dependent 6-phosphofructokinase, muscle type OS=Rattus norvegicus OX=10116 GN=Pfkm PE=1 SV=3	Red	0.16261		0.168123
Pre-frontal cortex	P63036	Dnaja1	DnaJ homolog subfamily A member 1 OS=Rattus norvegicus OX=10116 GN=Dnaja1 PE=1 SV=1	Green	0.16341		2.55639
Pre-frontal cortex	D3ZDK7	Pgp	Glycerol-3-phosphate phosphatase OS=Rattus norvegicus OX=10116 GN=Pgp PE=1 SV=1	Green	0.16372		1.35845
Pre-frontal cortex	B2GV54	Nceh1	Neutral cholesterol ester hydrolase 1 OS=Rattus norvegicus OX=10116 GN=Nceh1 PE=1 SV=1	Green	0.1646		-0.9855
Pre-frontal cortex	P18420	Psma1	Proteasome subunit alpha type-1 OS=Rattus norvegicus OX=10116 GN=Psma1 PE=1 SV=2	Red	0.16465		0.286304
Pre-frontal cortex	Q5FVI3	Lrrc57	Leucine-rich repeat-containing protein 57 OS=Rattus norvegicus OX=10116 GN=Lrrc57 PE=2 SV=1	Green	0.16551		-1.28688
Pre-frontal cortex	P84083	Arf5	ADP-ribosylation factor 5 OS=Rattus norvegicus OX=10116 GN=Arf5 PE=1 SV=2	Red	0.16588		-0.344828
Pre-frontal cortex	Q9R0I8	Pip4k2a	Phosphatidylinositol 5-phosphate 4-kinase type-2 alpha OS=Rattus norvegicus OX=10116 GN=Pip4k2a PE=1 SV=1	Green	0.1661		1.39593
Pre-frontal cortex	P63029	Tpt1	Translationally-controlled tumor protein OS=Rattus norvegicus OX=10116 GN=Tpt1 PE=1 SV=1	Red	0.16695		0.454032
Pre-frontal cortex	Q02356	Ampd2	AMP deaminase 2 OS=Rattus norvegicus OX=10116 GN=Ampd2 PE=1 SV=2	Red	0.16729		-0.389567
Pre-frontal cortex	Q63635	Stx6	Syntaxin-6 OS=Rattus norvegicus OX=10116 GN=Stx6 PE=1 SV=1	Green	0.16733		-2.40054
Pre-frontal cortex	P15205	Map1b	Microtubule-associated protein 1B OS=Rattus norvegicus OX=10116 GN=Map1b PE=1 SV=3	Red	0.16765		-0.411426
Pre-frontal cortex	Q9JJ19	Slc9a3r1	Na(+)/H(+) exchange regulatory cofactor NHE-RF1 OS=Rattus norvegicus OX=10116 GN=Slc9a3r1 PE=1 SV=3	Red	0.16847		0.168123
Pre-frontal cortex	P06302	Ptma	Prothymosin alpha OS=Rattus norvegicus OX=10116 GN=Ptma PE=1 SV=2	Red	0.17157		-0.545968
Pre-frontal cortex	Q63092	Camkv	CaM kinase-like vesicle-associated protein OS=Rattus norvegicus OX=10116 GN=Camkv PE=1 SV=1	Red	0.17304		-0.137504
Pre-frontal cortex	Q6AYR6	Hdhd2	Haloacid dehalogenase-like hydrolase domain-containing protein 2 OS=Rattus norvegicus OX=10116 GN=Hdhd2 PE=2 SV=1	Red	0.17306		0.577767
Pre-frontal cortex	Q6AY09	Hnrnph2	Heterogeneous nuclear ribonucleoprotein H2 OS=Rattus norvegicus OX=10116 GN=Hnrnph2 PE=1 SV=1	Red	0.17407		0.395929
Pre-frontal cortex	P26817	Grk2	Beta-adrenergic receptor kinase 1 OS=Rattus norvegicus OX=10116 GN=Grk2 PE=1 SV=1	Green	0.17457		1
Pre-frontal cortex	Q5PPJ9	Sh3glb2	Endophilin-B2 OS=Rattus norvegicus OX=10116 GN=Sh3glb2 PE=1 SV=2	Red	0.1748		-0.137504
Pre-frontal cortex	Q9ESW0	Ddb1	DNA damage-binding protein 1 OS=Rattus norvegicus OX=10116 GN=Ddb1 PE=1 SV=1	Red	0.17481		0.304006
Pre-frontal cortex	Q6AYH5	Dctn2	Dynactin subunit 2 OS=Rattus norvegicus OX=10116 GN=Dctn2 PE=1 SV=1	Red	0.17553		0.152003
Pre-frontal cortex	P55161	Nckap1	Nck-associated protein 1 OS=Rattus norvegicus OX=10116 GN=Nckap1 PE=2 SV=1	Red	0.17557		0.168123
Pre-frontal cortex	Q03114	Cdk5	Cyclin-dependent-like kinase 5 OS=Rattus norvegicus OX=10116 GN=Cdk5 PE=1 SV=1	Red	0.17683		0.184425
Pre-frontal cortex	P62246	Rps15a	40S ribosomal protein S15a OS=Rattus norvegicus OX=10116 GN=Rps15a PE=1 SV=2	Red	0.17732		0.321928
Pre-frontal cortex	P52555	Erp29	Endoplasmic reticulum resident protein 29 OS=Rattus norvegicus OX=10116 GN=Erp29 PE=1 SV=2	Green	0.17907		-1.7137
Pre-frontal cortex	Q794F9	Slc3a2	4F2 cell-surface antigen heavy chain OS=Rattus norvegicus OX=10116 GN=Slc3a2 PE=1 SV=1	Green	0.17956		-0.895303
Pre-frontal cortex	Q64591	Decr1	2,4-dienoyl-CoA reductase [(3E)-enoyl-CoA-producing], mitochondrial OS=Rattus norvegicus OX=10116 GN=Decr1 PE=1 SV=2	Green	0.17995		-0.739848
Pre-frontal cortex	P10536	Rab1b	Ras-related protein Rab-1B OS=Rattus norvegicus OX=10116 GN=Rab1b PE=1 SV=1	Red	0.17999		0.268817
Pre-frontal cortex	P60203	Plp1	Myelin proteolipid protein OS=Rattus norvegicus OX=10116 GN=Plp1 PE=1 SV=2	Green	0.17999		0.666576
Pre-frontal cortex	O54921	Exoc2	Exocyst complex component 2 OS=Rattus norvegicus OX=10116 GN=Exoc2 PE=1 SV=1	Green	0.18009		1.08927
Pre-frontal cortex	O35112	Alcam	CD166 antigen OS=Rattus norvegicus OX=10116 GN=Alcam PE=1 SV=1	Green	0.18023		-1.04264
Pre-frontal cortex	P16086	Sptan1	Spectrin alpha chain, non-erythrocytic 1 OS=Rattus norvegicus OX=10116 GN=Sptan1 PE=1 SV=2	Red	0.18107		0.217591
Pre-frontal cortex	Q9WVB1	Rab6a	Ras-related protein Rab-6A OS=Rattus norvegicus OX=10116 GN=Rab6a PE=1 SV=2	Red	0.18119		-0.238787
Pre-frontal cortex	Q62785	Pdap1	28 kDa heat- and acid-stable phosphoprotein OS=Rattus norvegicus OX=10116 GN=Pdap1 PE=1 SV=1	Red	0.18146		0.37707
Pre-frontal cortex	P14942	Gsta4	Glutathione S-transferase alpha-4 OS=Rattus norvegicus OX=10116 GN=Gsta4 PE=1 SV=2	Red	0.18159		0.415037
Pre-frontal cortex	P54319	Plaa	Phospholipase A-2-activating protein OS=Rattus norvegicus OX=10116 GN=Plaa PE=1 SV=3	Green	0.18234		2.47393
Pre-frontal cortex	P63322	Rala	Ras-related protein Ral-A OS=Rattus norvegicus OX=10116 GN=Rala PE=1 SV=1	Red	0.18254		0.268817
Pre-frontal cortex	P42123	Ldhb	L-lactate dehydrogenase B chain OS=Rattus norvegicus OX=10116 GN=Ldhb PE=1 SV=2	Red	0.18274		0.104697
Pre-frontal cortex	Q9Z1B2	Gstm5	Glutathione S-transferase Mu 5 OS=Rattus norvegicus OX=10116 GN=Gstm5 PE=1 SV=3	Red	0.18455		-0.275007
Pre-frontal cortex	Q5XIG8	Strap	Serine-threonine kinase receptor-associated protein OS=Rattus norvegicus OX=10116 GN=Strap PE=1 SV=1	Red	0.18491		-0.495695
Pre-frontal cortex	P70500	Cdipt	CDP-diacylglycerol--inositol 3-phosphatidyltransferase OS=Rattus norvegicus OX=10116 GN=Cdipt PE=1 SV=1	Green	0.18501		-0.823749
Pre-frontal cortex	B5DFN2	Ahcyl1	S-adenosylhomocysteine hydrolase-like protein 1 OS=Rattus norvegicus OX=10116 GN=Ahcyl1 PE=1 SV=2	Red	0.18511		0.104697
Pre-frontal cortex	P21670	Psma4	Proteasome subunit alpha type-4 OS=Rattus norvegicus OX=10116 GN=Psma4 PE=1 SV=1	Red	0.18566		-0.378512
Pre-frontal cortex	P20595	Gucy1b1	Guanylate cyclase soluble subunit beta-1 OS=Rattus norvegicus OX=10116 GN=Gucy1b1 PE=1 SV=2	Red	0.18607		0.415037
Pre-frontal cortex	P04636	Mdh2	Malate dehydrogenase, mitochondrial OS=Rattus norvegicus OX=10116 GN=Mdh2 PE=1 SV=2	Red	0.1875		0.104697
Pre-frontal cortex	Q6PEC0	Nudt2	Bis(5'-nucleosyl)-tetraphosphatase [asymmetrical] OS=Rattus norvegicus OX=10116 GN=Nudt2 PE=2 SV=3	Red	0.18814		0.37707
Pre-frontal cortex	Q64428	Hadha	Trifunctional enzyme subunit alpha, mitochondrial OS=Rattus norvegicus OX=10116 GN=Hadha PE=1 SV=2	Green	0.18821		-0.963474
Pre-frontal cortex	Q5HZY2	Sar1b	GTP-binding protein SAR1b OS=Rattus norvegicus OX=10116 GN=Sar1b PE=2 SV=1	Green	0.18892		1.51457
Pre-frontal cortex	Q91ZN1	Coro1a	Coronin-1A OS=Rattus norvegicus OX=10116 GN=Coro1a PE=1 SV=3	Red	0.18897		-0.15056
Pre-frontal cortex	Q1WIM3	Cadm3	Cell adhesion molecule 3 OS=Rattus norvegicus OX=10116 GN=Cadm3 PE=1 SV=1	Green	0.18946		-0.83996
Pre-frontal cortex	Q5EB77	Rab18	Ras-related protein Rab-18 OS=Rattus norvegicus OX=10116 GN=Rab18 PE=2 SV=1	Red	0.18978		0.473931
Pre-frontal cortex	P62632	Eef1a2	Elongation factor 1-alpha 2 OS=Rattus norvegicus OX=10116 GN=Eef1a2 PE=1 SV=1	Red	0.19056		0.321928
Pre-frontal cortex	P62198	Psmc5	26S proteasome regulatory subunit 8 OS=Rattus norvegicus OX=10116 GN=Psmc5 PE=1 SV=1	Red	0.19057		0.168123
Pre-frontal cortex	Q499N5	Acsf2	Medium-chain acyl-CoA ligase ACSF2, mitochondrial OS=Rattus norvegicus OX=10116 GN=Acsf2 PE=2 SV=1	Red	0.19061		0.321928
Pre-frontal cortex	Q63347	Psmc2	26S proteasome regulatory subunit 7 OS=Rattus norvegicus OX=10116 GN=Psmc2 PE=1 SV=3	Red	0.19122		0.286304
Pre-frontal cortex	P51111	Htt	Huntingtin OS=Rattus norvegicus OX=10116 GN=Htt PE=1 SV=1	Green	0.19272		-0.879706
Pre-frontal cortex	P29314	Rps9	40S ribosomal protein S9 OS=Rattus norvegicus OX=10116 GN=Rps9 PE=1 SV=4	Red	0.19291		0.268817
Pre-frontal cortex	P27952	Rps2	40S ribosomal protein S2 OS=Rattus norvegicus OX=10116 GN=Rps2 PE=1 SV=1	Red	0.19308		0.217591
Pre-frontal cortex	Q99JD4	Clasp2	CLIP-associating protein 2 OS=Rattus norvegicus OX=10116 GN=Clasp2 PE=1 SV=1	Red	0.19313		0.37707
Pre-frontal cortex	P19627	Gnaz	Guanine nucleotide-binding protein G(z) subunit alpha OS=Rattus norvegicus OX=10116 GN=Gnaz PE=2 SV=3	Green	0.19313		-0.847997
Pre-frontal cortex	A0A0G2JUG7	Iqsec1	IQ motif and SEC7 domain-containing protein 1 OS=Rattus norvegicus OX=10116 GN=Iqsec1 PE=1 SV=1	Green	0.19494		1.05889
Pre-frontal cortex	P12007	Ivd	Isovaleryl-CoA dehydrogenase, mitochondrial OS=Rattus norvegicus OX=10116 GN=Ivd PE=1 SV=2	Red	0.19522		0.321928
Pre-frontal cortex	Q66HF1	Ndufs1	NADH-ubiquinone oxidoreductase 75 kDa subunit, mitochondrial OS=Rattus norvegicus OX=10116 GN=Ndufs1 PE=1 SV=1	Green	0.19544		0.971431
Pre-frontal cortex	P97756	Camkk1	Calcium/calmodulin-dependent protein kinase kinase 1 OS=Rattus norvegicus OX=10116 GN=Camkk1 PE=1 SV=1	Red	0.19679		-0.575312
Pre-frontal cortex	P04764	Eno1	Alpha-enolase OS=Rattus norvegicus OX=10116 GN=Eno1 PE=1 SV=4	Red	0.19734		0.152003
Pre-frontal cortex	M0RC99	Rab5a	Ras-related protein Rab-5A OS=Rattus norvegicus OX=10116 GN=Rab5a PE=2 SV=1	Red	0.19922		-0.422233
Pre-frontal cortex	P12749	Rpl26	60S ribosomal protein L26 OS=Rattus norvegicus OX=10116 GN=Rpl26 PE=1 SV=1	Red	0.19933		0.340075
Pre-frontal cortex	P13596	Ncam1	Neural cell adhesion molecule 1 OS=Rattus norvegicus OX=10116 GN=Ncam1 PE=1 SV=1	Red	0.19973		-0.485427
Pre-frontal cortex	Q63041	A1m	Alpha-1-macroglobulin OS=Rattus norvegicus OX=10116 GN=A1m PE=1 SV=1	Green	0.20041		-0.713696
Pre-frontal cortex	Q07205	Eif5	Eukaryotic translation initiation factor 5 OS=Rattus norvegicus OX=10116 GN=Eif5 PE=1 SV=1	Red	0.20051		0.251539
Pre-frontal cortex	F1LQ48	Hnrnpl	Heterogeneous nuclear ribonucleoprotein L OS=Rattus norvegicus OX=10116 GN=Hnrnpl PE=1 SV=2	Red	0.20124		0.286304
Pre-frontal cortex	P24587	Akap5	A-kinase anchor protein 5 OS=Rattus norvegicus OX=10116 GN=Akap5 PE=1 SV=2	Red	0.20207		0.184425
Pre-frontal cortex	Q6PDV7	Rpl10	60S ribosomal protein L10 OS=Rattus norvegicus OX=10116 GN=Rpl10 PE=1 SV=3	Red	0.20273		0.37707
Pre-frontal cortex	P62630	Eef1a1	Elongation factor 1-alpha 1 OS=Rattus norvegicus OX=10116 GN=Eef1a1 PE=2 SV=1	Red	0.20289		0.152003
Pre-frontal cortex	Q99MZ8	Lasp1	LIM and SH3 domain protein 1 OS=Rattus norvegicus OX=10116 GN=Lasp1 PE=1 SV=1	Red	0.20294		-0.226509
Pre-frontal cortex	P17220	Psma2	Proteasome subunit alpha type-2 OS=Rattus norvegicus OX=10116 GN=Psma2 PE=1 SV=3	Red	0.20295		0.286304
Pre-frontal cortex	P62703	Rps4x	40S ribosomal protein S4, X isoform OS=Rattus norvegicus OX=10116 GN=Rps4x PE=2 SV=2	Red	0.20298		0.268817
Pre-frontal cortex	Q60587	Hadhb	Trifunctional enzyme subunit beta, mitochondrial OS=Rattus norvegicus OX=10116 GN=Hadhb PE=1 SV=1	Red	0.20305		-0.411426
Pre-frontal cortex	O08875	Dclk1	Serine/threonine-protein kinase DCLK1 OS=Rattus norvegicus OX=10116 GN=Dclk1 PE=1 SV=1	Red	0.20389		0.136062
Pre-frontal cortex	Q5U1Z2	Trappc3	Trafficking protein particle complex subunit 3 OS=Rattus norvegicus OX=10116 GN=Trappc3 PE=2 SV=1	Red	0.20465		0.340075
Pre-frontal cortex	P54290	Cacna2d1	Voltage-dependent calcium channel subunit alpha-2/delta-1 OS=Rattus norvegicus OX=10116 GN=Cacna2d1 PE=1 SV=1	Green	0.20537		-0.963474
Pre-frontal cortex	Q5BJU7	Wasf1	Wiskott-Aldrich syndrome protein family member 1 OS=Rattus norvegicus OX=10116 GN=Wasf1 PE=1 SV=1	Red	0.20564		0.184425
Pre-frontal cortex	Q4V7C7	Actr3	Actin-related protein 3 OS=Rattus norvegicus OX=10116 GN=Actr3 PE=1 SV=1	Red	0.20567		0.136062
Pre-frontal cortex	P61107	Rab14	Ras-related protein Rab-14 OS=Rattus norvegicus OX=10116 GN=Rab14 PE=1 SV=3	Red	0.20626		0.136062
Pre-frontal cortex	P02770	Alb	Albumin OS=Rattus norvegicus OX=10116 GN=Alb PE=1 SV=2	Red	0.20644		-0.214125
Pre-frontal cortex	Q8VHF5	Cs	Citrate synthase, mitochondrial OS=Rattus norvegicus OX=10116 GN=Cs PE=1 SV=1	Red	0.20668		0.152003
Pre-frontal cortex	Q6NX65	Pdcd10	Programmed cell death protein 10 OS=Rattus norvegicus OX=10116 GN=Pdcd10 PE=2 SV=1	Green	0.20739		4.05889
Pre-frontal cortex	P15865	H1-4	Histone H1.4 OS=Rattus norvegicus OX=10116 GN=H1-4 PE=1 SV=3	Red	0.20745		0.37707
Pre-frontal cortex	Q62639	Rheb	GTP-binding protein Rheb OS=Rattus norvegicus OX=10116 GN=Rheb PE=1 SV=1	Red	0.20746		-0.298658
Pre-frontal cortex	P24368	Ppib	Peptidyl-prolyl cis-trans isomerase B OS=Rattus norvegicus OX=10116 GN=Ppib PE=1 SV=3	Red	0.20814		0.184425
Pre-frontal cortex	Q64361	Lxn	Latexin OS=Rattus norvegicus OX=10116 GN=Lxn PE=1 SV=1	Red	0.20862		-0.298658
Pre-frontal cortex	O08816	Wasl	Neural Wiskott-Aldrich syndrome protein OS=Rattus norvegicus OX=10116 GN=Wasl PE=1 SV=2	Green	0.20862		0.68966
Pre-frontal cortex	D4A6L0	Gpr158	Probable G-protein coupled receptor 158 OS=Rattus norvegicus OX=10116 GN=Gpr158 PE=1 SV=1	Green	0.20907		-0.632268
Pre-frontal cortex	P04639	Apoa1	Apolipoprotein A-I OS=Rattus norvegicus OX=10116 GN=Apoa1 PE=1 SV=2	Green	0.20941		0.888969
Pre-frontal cortex	P60901	Psma6	Proteasome subunit alpha type-6 OS=Rattus norvegicus OX=10116 GN=Psma6 PE=1 SV=1	Red	0.20951		0.168123
Pre-frontal cortex	Q99ND9	Rwdd1	RWD domain-containing protein 1 OS=Rattus norvegicus OX=10116 GN=Rwdd1 PE=2 SV=1	Green	0.21025		-0.722466
Pre-frontal cortex	Q62717	Cadps	Calcium-dependent secretion activator 1 OS=Rattus norvegicus OX=10116 GN=Cadps PE=1 SV=1	Red	0.21045		0.152003
Pre-frontal cortex	Q63564	Sv2b	Synaptic vesicle glycoprotein 2B OS=Rattus norvegicus OX=10116 GN=Sv2b PE=1 SV=1	Red	0.21063		-0.443607
Pre-frontal cortex	Q6MG06	Gnl1	Guanine nucleotide-binding protein-like 1 OS=Rattus norvegicus OX=10116 GN=Gnl1 PE=1 SV=1	Green	0.21082		-0.773996
Pre-frontal cortex	Q711G3	Iah1	Isoamyl acetate-hydrolyzing esterase 1 homolog OS=Rattus norvegicus OX=10116 GN=Iah1 PE=2 SV=2	Red	0.21155		0.152003
Pre-frontal cortex	P43278	H1-0	Histone H1.0 OS=Rattus norvegicus OX=10116 GN=H1-0 PE=2 SV=2	Red	0.2119		0.514573
Pre-frontal cortex	B2RZ37	Reep5	Receptor expression-enhancing protein 5 OS=Rattus norvegicus OX=10116 GN=Reep5 PE=1 SV=1	Red	0.21347		-0.275007
Pre-frontal cortex	P24473	Gstk1	Glutathione S-transferase kappa 1 OS=Rattus norvegicus OX=10116 GN=Gstk1 PE=1 SV=3	Green	0.21376		1
Pre-frontal cortex	P31399	Atp5pd	ATP synthase subunit d, mitochondrial OS=Rattus norvegicus OX=10116 GN=Atp5pd PE=1 SV=3	Red	0.21417		-0.464668
Pre-frontal cortex	P62250	Rps16	40S ribosomal protein S16 OS=Rattus norvegicus OX=10116 GN=Rps16 PE=1 SV=2	Red	0.2153		0.268817
Pre-frontal cortex	P37397	Cnn3	Calponin-3 OS=Rattus norvegicus OX=10116 GN=Cnn3 PE=1 SV=1	Red	0.21559		0.415037
Pre-frontal cortex	Q66H62	Cyld	Ubiquitin carboxyl-terminal hydrolase CYLD OS=Rattus norvegicus OX=10116 GN=Cyld PE=1 SV=1	Green	0.21563		-5.08704
Pre-frontal cortex	Q7TMB7	Plppr4	Phospholipid phosphatase-related protein type 4 OS=Rattus norvegicus OX=10116 GN=Plppr4 PE=1 SV=1	Green	0.2159		-0.757023
Pre-frontal cortex	P19804	Nme2	Nucleoside diphosphate kinase B OS=Rattus norvegicus OX=10116 GN=Nme2 PE=1 SV=1	Red	0.21643		0.120294
Pre-frontal cortex	Q6P9T8	Tubb4b	Tubulin beta-4B chain OS=Rattus norvegicus OX=10116 GN=Tubb4b PE=1 SV=1	Red	0.21674		0.152003
Pre-frontal cortex	Q6P799	Sars1	Serine--tRNA ligase, cytoplasmic OS=Rattus norvegicus OX=10116 GN=Sars1 PE=1 SV=3	Red	0.21713		0.234465
Pre-frontal cortex	P20761	Igh-1a	Ig gamma-2B chain C region OS=Rattus norvegicus OX=10116 GN=Igh-1a PE=1 SV=1	Green	0.21726		-1.02148
Pre-frontal cortex	P00507	Got2	Aspartate aminotransferase, mitochondrial OS=Rattus norvegicus OX=10116 GN=Got2 PE=1 SV=2	Red	0.21742		0.120294
Pre-frontal cortex	Q63617	Hyou1	Hypoxia up-regulated protein 1 OS=Rattus norvegicus OX=10116 GN=Hyou1 PE=1 SV=1	Red	0.21856		0.217591
Pre-frontal cortex	Q6PCU2	Atp6v1e1	V-type proton ATPase subunit E 1 OS=Rattus norvegicus OX=10116 GN=Atp6v1e1 PE=1 SV=1	Red	0.21883		0.168123
Pre-frontal cortex	Q3T1K5	Capza2	F-actin-capping protein subunit alpha-2 OS=Rattus norvegicus OX=10116 GN=Capza2 PE=1 SV=1	Red	0.21985		0.168123
Pre-frontal cortex	P63170	Dynll1	Dynein light chain 1, cytoplasmic OS=Rattus norvegicus OX=10116 GN=Dynll1 PE=1 SV=1	Red	0.22004		0.152003
Pre-frontal cortex	Q6P4Z6	Lcmt1	Leucine carboxyl methyltransferase 1 OS=Rattus norvegicus OX=10116 GN=Lcmt1 PE=2 SV=1	Red	0.22038		0.234465
Pre-frontal cortex	P85515	Actr1a	Alpha-centractin OS=Rattus norvegicus OX=10116 GN=Actr1a PE=1 SV=1	Red	0.22075		0.0892673
Pre-frontal cortex	P57113	Gstz1	Maleylacetoacetate isomerase OS=Rattus norvegicus OX=10116 GN=Gstz1 PE=1 SV=2	Green	0.22164		0.68966
Pre-frontal cortex	Q5GFD9	Impact	Protein IMPACT OS=Rattus norvegicus OX=10116 GN=Impact PE=1 SV=1	Red	0.2217		-0.15056
Pre-frontal cortex	Q9Z2L0	Vdac1	Voltage-dependent anion-selective channel protein 1 OS=Rattus norvegicus OX=10116 GN=Vdac1 PE=1 SV=4	Green	0.22188		-1
Pre-frontal cortex	Q8K4K5	Llgl1	Lethal(2) giant larvae protein homolog 1 OS=Rattus norvegicus OX=10116 GN=Llgl1 PE=1 SV=1	Red	0.22248		0.599462
Pre-frontal cortex	B0BN93	Psmd13	26S proteasome non-ATPase regulatory subunit 13 OS=Rattus norvegicus OX=10116 GN=Psmd13 PE=1 SV=1	Red	0.22458		0.234465
Pre-frontal cortex	Q9ES40	Arl6ip5	PRA1 family protein 3 OS=Rattus norvegicus OX=10116 GN=Arl6ip5 PE=1 SV=1	Red	0.2249		-0.400538
Pre-frontal cortex	P04218	Cd200	OX-2 membrane glycoprotein OS=Rattus norvegicus OX=10116 GN=Cd200 PE=2 SV=1	Green	0.2253		-0.687061
Pre-frontal cortex	Q9WU82	Ctnnb1	Catenin beta-1 OS=Rattus norvegicus OX=10116 GN=Ctnnb1 PE=1 SV=1	Green	0.22538		-1.23266
Pre-frontal cortex	Q9JJK1	Gpm6b	Neuronal membrane glycoprotein M6-b OS=Rattus norvegicus OX=10116 GN=Gpm6b PE=1 SV=1	Red	0.22539		-0.475085
Pre-frontal cortex	Q920Q0	Palm	Paralemmin-1 OS=Rattus norvegicus OX=10116 GN=Palm PE=1 SV=1	Red	0.22683		0.304006
Pre-frontal cortex	P07340	Atp1b1	Sodium/potassium-transporting ATPase subunit beta-1 OS=Rattus norvegicus OX=10116 GN=Atp1b1 PE=1 SV=1	Red	0.22771		-0.454176
Pre-frontal cortex	P11980	Pkm	Pyruvate kinase PKM OS=Rattus norvegicus OX=10116 GN=Pkm PE=1 SV=3	Red	0.22776		0.136062
Pre-frontal cortex	Q5XIN6	Letm1	Mitochondrial proton/calcium exchanger protein OS=Rattus norvegicus OX=10116 GN=Letm1 PE=1 SV=1	Green	0.228		-2.23573
Pre-frontal cortex	D4A208	Srgap2	SLIT-ROBO Rho GTPase-activating protein 2 OS=Rattus norvegicus OX=10116 GN=Srgap2 PE=1 SV=1	Red	0.22823		0.340075
Pre-frontal cortex	P18418	Calr	Calreticulin OS=Rattus norvegicus OX=10116 GN=Calr PE=1 SV=1	Red	0.2284		-0.15056
Pre-frontal cortex	P62193	Psmc1	26S proteasome regulatory subunit 4 OS=Rattus norvegicus OX=10116 GN=Psmc1 PE=1 SV=1	Red	0.22912		0.200913
Pre-frontal cortex	P13383	Ncl	Nucleolin OS=Rattus norvegicus OX=10116 GN=Ncl PE=1 SV=3	Green	0.22947		-1.05658
Pre-frontal cortex	P02091	Hbb	Hemoglobin subunit beta-1 OS=Rattus norvegicus OX=10116 GN=Hbb PE=1 SV=3	Red	0.22949		-0.201634
Pre-frontal cortex	Q5U1X1	Rexo2	Oligoribonuclease, mitochondrial OS=Rattus norvegicus OX=10116 GN=Rexo2 PE=2 SV=1	Green	0.22994		-1.36737
Pre-frontal cortex	P06687	Atp1a3	Sodium/potassium-transporting ATPase subunit alpha-3 OS=Rattus norvegicus OX=10116 GN=Atp1a3 PE=1 SV=2	Red	0.23017		-0.495695
Pre-frontal cortex	Q3T1J1	Eif5a	Eukaryotic translation initiation factor 5A-1 OS=Rattus norvegicus OX=10116 GN=Eif5a PE=1 SV=3	Red	0.23052		0.136062
Pre-frontal cortex	Q7M0E3	Dstn	Destrin OS=Rattus norvegicus OX=10116 GN=Dstn PE=1 SV=3	Red	0.23098		0.168123
Pre-frontal cortex	Q9Z270	Vapa	Vesicle-associated membrane protein-associated protein A OS=Rattus norvegicus OX=10116 GN=Vapa PE=1 SV=3	Red	0.23111		0.268817
Pre-frontal cortex	P18266	Gsk3b	Glycogen synthase kinase-3 beta OS=Rattus norvegicus OX=10116 GN=Gsk3b PE=1 SV=1	Red	0.23126		0.268817
Pre-frontal cortex	Q99MI7	Uba3	NEDD8-activating enzyme E1 catalytic subunit OS=Rattus norvegicus OX=10116 GN=Uba3 PE=1 SV=1	Red	0.23242		0.340075
Pre-frontal cortex	Q5PQJ6	Pycr3	Pyrroline-5-carboxylate reductase 3 OS=Rattus norvegicus OX=10116 GN=Pycr3 PE=2 SV=1	Green	0.23349		-0.831877
Pre-frontal cortex	P38659	Pdia4	Protein disulfide-isomerase A4 OS=Rattus norvegicus OX=10116 GN=Pdia4 PE=1 SV=2	Green	0.23403		-0.641546
Pre-frontal cortex	P62804	H4c2	Histone H4 OS=Rattus norvegicus OX=10116 GN=H4c2 PE=1 SV=2	Green	0.2346		-0.879706
Pre-frontal cortex	Q5EGY4	Ykt6	Synaptobrevin homolog YKT6 OS=Rattus norvegicus OX=10116 GN=Ykt6 PE=1 SV=1	Red	0.23481		0.217591
Pre-frontal cortex	P18297	Spr	Sepiapterin reductase OS=Rattus norvegicus OX=10116 GN=Spr PE=1 SV=1	Green	0.23647		-0.782409
Pre-frontal cortex	Q9WUS0	Ak4	Adenylate kinase 4, mitochondrial OS=Rattus norvegicus OX=10116 GN=Ak4 PE=2 SV=1	Red	0.23681		0.217591
Pre-frontal cortex	Q8VHK7	Hdgf	Hepatoma-derived growth factor OS=Rattus norvegicus OX=10116 GN=Hdgf PE=1 SV=2	Red	0.23798		0.415037
Pre-frontal cortex	P60892	Prps1	Ribose-phosphate pyrophosphokinase 1 OS=Rattus norvegicus OX=10116 GN=Prps1 PE=1 SV=2	Red	0.23871		0.152003
Pre-frontal cortex	P23565	Ina	Alpha-internexin OS=Rattus norvegicus OX=10116 GN=Ina PE=1 SV=2	Red	0.23885		0.286304
Pre-frontal cortex	Q920A6	Scpep1	Retinoid-inducible serine carboxypeptidase OS=Rattus norvegicus OX=10116 GN=Scpep1 PE=2 SV=1	Red	0.23915		0.415037
Pre-frontal cortex	Q64560	Tpp2	Tripeptidyl-peptidase 2 OS=Rattus norvegicus OX=10116 GN=Tpp2 PE=2 SV=3	Red	0.24175		0.251539
Pre-frontal cortex	P50475	Aars1	Alanine--tRNA ligase, cytoplasmic OS=Rattus norvegicus OX=10116 GN=Aars1 PE=1 SV=3	Red	0.24356		-0.333424
Pre-frontal cortex	Q8VHK2	Caskin1	Caskin-1 OS=Rattus norvegicus OX=10116 GN=Caskin1 PE=1 SV=1	Green	0.24396		-0.687061
Pre-frontal cortex	P05712	Rab2a	Ras-related protein Rab-2A OS=Rattus norvegicus OX=10116 GN=Rab2a PE=2 SV=1	Red	0.24482		0.184425
Pre-frontal cortex	Q63716	Prdx1	Peroxiredoxin-1 OS=Rattus norvegicus OX=10116 GN=Prdx1 PE=1 SV=1	Red	0.24489		0.152003
Pre-frontal cortex	Q66HD0	Hsp90b1	Endoplasmin OS=Rattus norvegicus OX=10116 GN=Hsp90b1 PE=1 SV=2	Red	0.24516		-0.367371
Pre-frontal cortex	Q5SGE0	Lrpprc	Leucine-rich PPR motif-containing protein, mitochondrial OS=Rattus norvegicus OX=10116 GN=Lrpprc PE=1 SV=1	Red	0.24557		0.395929
Pre-frontal cortex	P27653	Mthfd1	C-1-tetrahydrofolate synthase, cytoplasmic OS=Rattus norvegicus OX=10116 GN=Mthfd1 PE=1 SV=3	Red	0.24635		0.251539
Pre-frontal cortex	D3ZAF6	Atp5mf	ATP synthase subunit f, mitochondrial OS=Rattus norvegicus OX=10116 GN=Atp5mf PE=1 SV=1	Red	0.24653		-0.286881
Pre-frontal cortex	P36876	Ppp2r2a	Serine/threonine-protein phosphatase 2A 55 kDa regulatory subunit B alpha isoform OS=Rattus norvegicus OX=10116 GN=Ppp2r2a PE=2 SV=1	Red	0.24673		0.234465
Pre-frontal cortex	D3ZFD0	Myo18a	Unconventional myosin-XVIIIa OS=Rattus norvegicus OX=10116 GN=Myo18a PE=1 SV=2	Red	0.24698		-0.536053
Pre-frontal cortex	Q01062	Pde2a	cGMP-dependent 3',5'-cyclic phosphodiesterase OS=Rattus norvegicus OX=10116 GN=Pde2a PE=1 SV=2	Red	0.24724		-0.422233
Pre-frontal cortex	P41562	Idh1	Isocitrate dehydrogenase [NADP] cytoplasmic OS=Rattus norvegicus OX=10116 GN=Idh1 PE=1 SV=1	Red	0.24781		-0.201634
Pre-frontal cortex	P97878	Exoc5	Exocyst complex component 5 OS=Rattus norvegicus OX=10116 GN=Exoc5 PE=1 SV=1	Red	0.25104		-0.378512
Pre-frontal cortex	Q03344	Atp5if1	ATPase inhibitor, mitochondrial OS=Rattus norvegicus OX=10116 GN=Atp5if1 PE=3 SV=2	Red	0.25107		-0.422233
Pre-frontal cortex	Q07266	Dbn1	Drebrin OS=Rattus norvegicus OX=10116 GN=Dbn1 PE=1 SV=3	Red	0.2512		-0.176323
Pre-frontal cortex	Q9JJ31	Cul5	Cullin-5 OS=Rattus norvegicus OX=10116 GN=Cul5 PE=1 SV=3	Red	0.25144		0.168123
Pre-frontal cortex	O55043	Arhgef7	Rho guanine nucleotide exchange factor 7 OS=Rattus norvegicus OX=10116 GN=Arhgef7 PE=1 SV=1	Red	0.25162		-0.31034
Pre-frontal cortex	P54311	Gnb1	Guanine nucleotide-binding protein G(I)/G(S)/G(T) subunit beta-1 OS=Rattus norvegicus OX=10116 GN=Gnb1 PE=1 SV=4	Red	0.25263		-0.422233
Pre-frontal cortex	Q4KM73	Cmpk1	UMP-CMP kinase OS=Rattus norvegicus OX=10116 GN=Cmpk1 PE=1 SV=2	Red	0.2532		0.120294
Pre-frontal cortex	P62845	Rps15	40S ribosomal protein S15 OS=Rattus norvegicus OX=10116 GN=Rps15 PE=1 SV=2	Red	0.25327		-0.344828
Pre-frontal cortex	O88370	Pip4k2c	Phosphatidylinositol 5-phosphate 4-kinase type-2 gamma OS=Rattus norvegicus OX=10116 GN=Pip4k2c PE=1 SV=1	Red	0.25344		-0.422233
Pre-frontal cortex	Q4QQT4	Ppp2r1b	Serine/threonine-protein phosphatase 2A 65 kDa regulatory subunit A beta isoform OS=Rattus norvegicus OX=10116 GN=Ppp2r1b PE=2 SV=1	Red	0.25495		0.136062
Pre-frontal cortex	A0A0G2JTR4	Abr	Active breakpoint cluster region-related protein OS=Rattus norvegicus OX=10116 GN=Abr PE=1 SV=2	Red	0.25536		0.120294
Pre-frontal cortex	Q66H61	Qars1	Glutamine--tRNA ligase OS=Rattus norvegicus OX=10116 GN=Qars1 PE=1 SV=1	Green	0.25604		0.761213
Pre-frontal cortex	O70441	Syn3	Synapsin-3 OS=Rattus norvegicus OX=10116 GN=Syn3 PE=1 SV=1	Red	0.25645		-0.298658
Pre-frontal cortex	Q5XIE0	Anp32e	Acidic leucine-rich nuclear phosphoprotein 32 family member E OS=Rattus norvegicus OX=10116 GN=Anp32e PE=2 SV=1	Green	0.25891		-0.62293
Pre-frontal cortex	Q7M767	Ube2v2	Ubiquitin-conjugating enzyme E2 variant 2 OS=Rattus norvegicus OX=10116 GN=Ube2v2 PE=1 SV=3	Red	0.25903		0.234465
Pre-frontal cortex	Q9EQX9	Ube2n	Ubiquitin-conjugating enzyme E2 N OS=Rattus norvegicus OX=10116 GN=Ube2n PE=1 SV=1	Red	0.25937		0.136062
Pre-frontal cortex	Q64057	Aldh7a1	Alpha-aminoadipic semialdehyde dehydrogenase OS=Rattus norvegicus OX=10116 GN=Aldh7a1 PE=1 SV=2	Red	0.25967		0.535332
Pre-frontal cortex	P27274	Cd59	CD59 glycoprotein OS=Rattus norvegicus OX=10116 GN=Cd59 PE=1 SV=2	Green	0.26035		-0.887525
Pre-frontal cortex	Q8K4Y5	Lgi1	Leucine-rich glioma-inactivated protein 1 OS=Rattus norvegicus OX=10116 GN=Lgi1 PE=1 SV=1	Green	0.26047		-0.879706
Pre-frontal cortex	Q71UE8	Nedd8	NEDD8 OS=Rattus norvegicus OX=10116 GN=Nedd8 PE=1 SV=1	Red	0.26051		0.168123
Pre-frontal cortex	P83868	Ptges3	Prostaglandin E synthase 3 OS=Rattus norvegicus OX=10116 GN=Ptges3 PE=1 SV=2	Red	0.26106		0.136062
Pre-frontal cortex	Q923S8	Pank4	4'-phosphopantetheine phosphatase OS=Rattus norvegicus OX=10116 GN=Pank4 PE=1 SV=1	Green	0.26129		-0.903038
Pre-frontal cortex	Q63009	Prmt1	Protein arginine N-methyltransferase 1 OS=Rattus norvegicus OX=10116 GN=Prmt1 PE=1 SV=1	Red	0.26145		0.340075
Pre-frontal cortex	P11884	Aldh2	Aldehyde dehydrogenase, mitochondrial OS=Rattus norvegicus OX=10116 GN=Aldh2 PE=1 SV=1	Red	0.26175		-0.124328
Pre-frontal cortex	P61765-2	Stxbp1	Isoform 2 of Syntaxin-binding protein 1 OS=Rattus norvegicus OX=10116 GN=Stxbp1	Red	0.262		0.268817
Pre-frontal cortex	P07335	Ckb	Creatine kinase B-type OS=Rattus norvegicus OX=10116 GN=Ckb PE=1 SV=2	Red	0.26226		0.104697
Pre-frontal cortex	P48037	Anxa6	Annexin A6 OS=Rattus norvegicus OX=10116 GN=Anxa6 PE=1 SV=2	Green	0.26334		-1.70929
Pre-frontal cortex	Q91Z79	Ppfia3	Liprin-alpha-3 OS=Rattus norvegicus OX=10116 GN=Ppfia3 PE=1 SV=2	Red	0.26363		-0.367371
Pre-frontal cortex	F1M386	Rapgef2	Rap guanine nucleotide exchange factor 2 OS=Rattus norvegicus OX=10116 GN=Rapgef2 PE=1 SV=2	Red	0.2638		0.304006
Pre-frontal cortex	P04897	Gnai2	Guanine nucleotide-binding protein G(i) subunit alpha-2 OS=Rattus norvegicus OX=10116 GN=Gnai2 PE=1 SV=3	Green	0.26463		-0.678072
Pre-frontal cortex	Q7TT49	Cdc42bpb	Serine/threonine-protein kinase MRCK beta OS=Rattus norvegicus OX=10116 GN=Cdc42bpb PE=1 SV=1	Green	0.26602		-1.86394
Pre-frontal cortex	Q00715	Histone H2B type 1 OS=Rattus norvegicus OX=10116	Histone H2B type 1 OS=Rattus norvegicus OX=10116 PE=1 SV=2	Red	0.26662		-0.475085
Pre-frontal cortex	Q5PPH0	Enoph1	Enolase-phosphatase E1 OS=Rattus norvegicus OX=10116 GN=Enoph1 PE=2 SV=1	Red	0.2673		0.304006
Pre-frontal cortex	Q68FQ0	Cct5	T-complex protein 1 subunit epsilon OS=Rattus norvegicus OX=10116 GN=Cct5 PE=1 SV=1	Red	0.26813		0.168123
Pre-frontal cortex	D3ZHV2	Macf1	Microtubule-actin cross-linking factor 1 OS=Rattus norvegicus OX=10116 GN=Macf1 PE=1 SV=1	Red	0.26863		0.415037
Pre-frontal cortex	P28037	Aldh1l1	Cytosolic 10-formyltetrahydrofolate dehydrogenase OS=Rattus norvegicus OX=10116 GN=Aldh1l1 PE=1 SV=3	Red	0.26871		-0.505891
Pre-frontal cortex	P50137	Tkt	Transketolase OS=Rattus norvegicus OX=10116 GN=Tkt PE=1 SV=1	Red	0.26899		0.104697
Pre-frontal cortex	Q01205	Dlst	Dihydrolipoyllysine-residue succinyltransferase component of 2-oxoglutarate dehydrogenase complex, mitochondrial OS=Rattus norvegicus OX=10116 GN=Dlst PE=1 SV=2	Red	0.26928		0.168123
Pre-frontal cortex	P12369	Prkar2b	cAMP-dependent protein kinase type II-beta regulatory subunit OS=Rattus norvegicus OX=10116 GN=Prkar2b PE=1 SV=3	Red	0.2697		-0.124328
Pre-frontal cortex	P97700	Slc25a11	Mitochondrial 2-oxoglutarate/malate carrier protein OS=Rattus norvegicus OX=10116 GN=Slc25a11 PE=1 SV=3	Green	0.27242		-1.42223
Pre-frontal cortex	Q6P6V0	Gpi	Glucose-6-phosphate isomerase OS=Rattus norvegicus OX=10116 GN=Gpi PE=1 SV=1	Red	0.27296		0.0740006
Pre-frontal cortex	O88778	Bsn	Protein bassoon OS=Rattus norvegicus OX=10116 GN=Bsn PE=1 SV=3	Red	0.27498		-0.286881
Pre-frontal cortex	B2RYW9	Fahd2	Fumarylacetoacetate hydrolase domain-containing protein 2 OS=Rattus norvegicus OX=10116 GN=Fahd2 PE=1 SV=1	Red	0.27517		-0.0976108
Pre-frontal cortex	P63324	Rps12	40S ribosomal protein S12 OS=Rattus norvegicus OX=10116 GN=Rps12 PE=1 SV=2	Red	0.27555		0.168123
Pre-frontal cortex	Q8K3X8	Hsbp1	Heat shock factor-binding protein 1 OS=Rattus norvegicus OX=10116 GN=Hsbp1 PE=3 SV=1	Red	0.27675		0.168123
Pre-frontal cortex	P97710	Sirpa	Tyrosine-protein phosphatase non-receptor type substrate 1 OS=Rattus norvegicus OX=10116 GN=Sirpa PE=1 SV=1	Red	0.27713		-0.475085
Pre-frontal cortex	Q76EQ0	Srr	Serine racemase OS=Rattus norvegicus OX=10116 GN=Srr PE=1 SV=1	Red	0.27778		-0.163499
Pre-frontal cortex	Q63396	Sub1	Activated RNA polymerase II transcriptional coactivator p15 OS=Rattus norvegicus OX=10116 GN=Sub1 PE=1 SV=3	Red	0.27801		0.200913
Pre-frontal cortex	P12346	Tf	Serotransferrin OS=Rattus norvegicus OX=10116 GN=Tf PE=1 SV=3	Red	0.27817		-0.201634
Pre-frontal cortex	Q8CG45	Akr7a2	Aflatoxin B1 aldehyde reductase member 2 OS=Rattus norvegicus OX=10116 GN=Akr7a2 PE=1 SV=2	Red	0.28068		0.321928
Pre-frontal cortex	P10824	Gnai1	Guanine nucleotide-binding protein G(i) subunit alpha-1 OS=Rattus norvegicus OX=10116 GN=Gnai1 PE=1 SV=3	Red	0.28114		-0.238787
Pre-frontal cortex	Q6AYR2	Ndrg3	Protein NDRG3 OS=Rattus norvegicus OX=10116 GN=Ndrg3 PE=1 SV=1	Red	0.28131		-0.226509
Pre-frontal cortex	Q7TP47	Syncrip	Heterogeneous nuclear ribonucleoprotein Q OS=Rattus norvegicus OX=10116 GN=Syncrip PE=2 SV=1	Red	0.28224		0.120294
Pre-frontal cortex	B0BN94	Fam136a	Protein FAM136A OS=Rattus norvegicus OX=10116 GN=Fam136a PE=1 SV=1	Red	0.28248		-0.238787
Pre-frontal cortex	P59215	Gnao1	Guanine nucleotide-binding protein G(o) subunit alpha OS=Rattus norvegicus OX=10116 GN=Gnao1 PE=1 SV=2	Red	0.28397		0.286304
Pre-frontal cortex	Q5RKI0	Wdr1	WD repeat-containing protein 1 OS=Rattus norvegicus OX=10116 GN=Wdr1 PE=1 SV=3	Red	0.28463		0.104697
Pre-frontal cortex	P62963	Pfn1	Profilin-1 OS=Rattus norvegicus OX=10116 GN=Pfn1 PE=1 SV=2	Red	0.28572		0.168123
Pre-frontal cortex	B0BNE5	Esd	S-formylglutathione hydrolase OS=Rattus norvegicus OX=10116 GN=Esd PE=2 SV=1	Red	0.28607		0.168123
Pre-frontal cortex	Q3SWU3	Hnrnpdl	Heterogeneous nuclear ribonucleoprotein D-like OS=Rattus norvegicus OX=10116 GN=Hnrnpdl PE=1 SV=1	Red	0.28687		0.304006
Pre-frontal cortex	P68511	Ywhah	14-3-3 protein eta OS=Rattus norvegicus OX=10116 GN=Ywhah PE=1 SV=2	Red	0.28699		-0.111031
Pre-frontal cortex	Q9ESH6	Glrx	Glutaredoxin-1 OS=Rattus norvegicus OX=10116 GN=Glrx PE=3 SV=3	Red	0.28711		-0.443607
Pre-frontal cortex	P12711	Adh5	Alcohol dehydrogenase class-3 OS=Rattus norvegicus OX=10116 GN=Adh5 PE=1 SV=2	Red	0.28746		0.104697
Pre-frontal cortex	Q68FU3	Etfb	Electron transfer flavoprotein subunit beta OS=Rattus norvegicus OX=10116 GN=Etfb PE=1 SV=3	Red	0.2884		-0.163499
Pre-frontal cortex	O35824	Dnaja2	DnaJ homolog subfamily A member 2 OS=Rattus norvegicus OX=10116 GN=Dnaja2 PE=1 SV=1	Red	0.2893		0.0892673
Pre-frontal cortex	O54975	Xpnpep1	Xaa-Pro aminopeptidase 1 OS=Rattus norvegicus OX=10116 GN=Xpnpep1 PE=1 SV=1	Red	0.28945		-0.163499
Pre-frontal cortex	P41123	Rpl13	60S ribosomal protein L13 OS=Rattus norvegicus OX=10116 GN=Rpl13 PE=1 SV=2	Red	0.28965		0.152003
Pre-frontal cortex	P28075	Psmb5	Proteasome subunit beta type-5 OS=Rattus norvegicus OX=10116 GN=Psmb5 PE=1 SV=3	Red	0.28984		-0.163499
Pre-frontal cortex	Q63560	Map6	Microtubule-associated protein 6 OS=Rattus norvegicus OX=10116 GN=Map6 PE=1 SV=1	Red	0.29008		-0.163499
Pre-frontal cortex	Q9JIX3	Fhit	Bis(5'-adenosyl)-triphosphatase OS=Rattus norvegicus OX=10116 GN=Fhit PE=1 SV=1	Red	0.29058		0.184425
Pre-frontal cortex	P69682	Necap1	Adaptin ear-binding coat-associated protein 1 OS=Rattus norvegicus OX=10116 GN=Necap1 PE=1 SV=1	Red	0.29092		-0.163499
Pre-frontal cortex	G3V7P1	Stx12	Syntaxin-12 OS=Rattus norvegicus OX=10116 GN=Stx12 PE=1 SV=1	Red	0.291		0.494109
Pre-frontal cortex	Q9ES21	Sacm1l	Phosphatidylinositol-3-phosphatase SAC1 OS=Rattus norvegicus OX=10116 GN=Sacm1l PE=1 SV=1	Red	0.29214		0.494109
Pre-frontal cortex	Q02253	Aldh6a1	Methylmalonate-semialdehyde dehydrogenase [acylating], mitochondrial OS=Rattus norvegicus OX=10116 GN=Aldh6a1 PE=1 SV=1	Red	0.29279		0.0892673
Pre-frontal cortex	Q5XIC0	Eci2	Enoyl-CoA delta isomerase 2 OS=Rattus norvegicus OX=10116 GN=Eci2 PE=1 SV=1	Red	0.29425		0.217591
Pre-frontal cortex	P29147	Bdh1	D-beta-hydroxybutyrate dehydrogenase, mitochondrial OS=Rattus norvegicus OX=10116 GN=Bdh1 PE=1 SV=2	Red	0.29452		0.217591
Pre-frontal cortex	P0C2X9	Aldh4a1	Delta-1-pyrroline-5-carboxylate dehydrogenase, mitochondrial OS=Rattus norvegicus OX=10116 GN=Aldh4a1 PE=1 SV=1	Red	0.29504		0.535332
Pre-frontal cortex	P04904	Gsta3	Glutathione S-transferase alpha-3 OS=Rattus norvegicus OX=10116 GN=Gsta3 PE=1 SV=3	Red	0.29542		-0.475085
Pre-frontal cortex	P70645	Blmh	Bleomycin hydrolase OS=Rattus norvegicus OX=10116 GN=Blmh PE=1 SV=1	Red	0.29648		-0.344828
Pre-frontal cortex	Q62915	Cask	Peripheral plasma membrane protein CASK OS=Rattus norvegicus OX=10116 GN=Cask PE=1 SV=1	Red	0.29747		0.251539
Pre-frontal cortex	Q9QWN8	Sptbn2	Spectrin beta chain, non-erythrocytic 2 OS=Rattus norvegicus OX=10116 GN=Sptbn2 PE=1 SV=2	Red	0.29916		0.184425
Pre-frontal cortex	P69735	Rab3gap1	Rab3 GTPase-activating protein catalytic subunit (Fragments) OS=Rattus norvegicus OX=10116 GN=Rab3gap1 PE=1 SV=2	Red	0.29932		-0.594549
Pre-frontal cortex	P70483	Strn	Striatin OS=Rattus norvegicus OX=10116 GN=Strn PE=1 SV=1	Red	0.30072		-0.226509
Pre-frontal cortex	P51146	Rab4b	Ras-related protein Rab-4B OS=Rattus norvegicus OX=10116 GN=Rab4b PE=2 SV=1	Red	0.30172		0.251539
Pre-frontal cortex	Q9Z269	Vapb	Vesicle-associated membrane protein-associated protein B OS=Rattus norvegicus OX=10116 GN=Vapb PE=1 SV=3	Red	0.30283		0.37707
Pre-frontal cortex	P54921	Napa	Alpha-soluble NSF attachment protein OS=Rattus norvegicus OX=10116 GN=Napa PE=1 SV=2	Red	0.30365		0.217591
Pre-frontal cortex	P85968	Pgd	6-phosphogluconate dehydrogenase, decarboxylating OS=Rattus norvegicus OX=10116 GN=Pgd PE=1 SV=1	Red	0.30368		0.0892673
Pre-frontal cortex	P81155	Vdac2	Voltage-dependent anion-selective channel protein 2 OS=Rattus norvegicus OX=10116 GN=Vdac2 PE=1 SV=2	Green	0.30455		-0.941106
Pre-frontal cortex	Q05546	Tnr	Tenascin-R OS=Rattus norvegicus OX=10116 GN=Tnr PE=1 SV=1	Red	0.30462		-0.163499
Pre-frontal cortex	P34067	Psmb4	Proteasome subunit beta type-4 OS=Rattus norvegicus OX=10116 GN=Psmb4 PE=1 SV=2	Red	0.30529		0.217591
Pre-frontal cortex	P49432	Pdhb	Pyruvate dehydrogenase E1 component subunit beta, mitochondrial OS=Rattus norvegicus OX=10116 GN=Pdhb PE=1 SV=2	Red	0.30595		0.152003
Pre-frontal cortex	Q5FVH2	Pld3	5'-3' exonuclease PLD3 OS=Rattus norvegicus OX=10116 GN=Pld3 PE=1 SV=1	Red	0.30597		0.120294
Pre-frontal cortex	P17074	Rps19	40S ribosomal protein S19 OS=Rattus norvegicus OX=10116 GN=Rps19 PE=2 SV=3	Red	0.30686		0.120294
Pre-frontal cortex	Q9JKE3	Scamp5	Secretory carrier-associated membrane protein 5 OS=Rattus norvegicus OX=10116 GN=Scamp5 PE=2 SV=1	Red	0.30693		-0.286881
Pre-frontal cortex	P05197	Eef2	Elongation factor 2 OS=Rattus norvegicus OX=10116 GN=Eef2 PE=1 SV=4	Red	0.30693		0.0892673
Pre-frontal cortex	F1LU71	Auh	Methylglutaconyl-CoA hydratase, mitochondrial OS=Rattus norvegicus OX=10116 GN=Auh PE=1 SV=2	Red	0.30757		0.136062
Pre-frontal cortex	P62902	Rpl31	60S ribosomal protein L31 OS=Rattus norvegicus OX=10116 GN=Rpl31 PE=2 SV=1	Red	0.30795		-0.137504
Pre-frontal cortex	A0JPM9	Eif3j	Eukaryotic translation initiation factor 3 subunit J OS=Rattus norvegicus OX=10116 GN=Eif3j PE=1 SV=1	Red	0.30858		0.251539
Pre-frontal cortex	Q8R431	Mgll	Monoglyceride lipase OS=Rattus norvegicus OX=10116 GN=Mgll PE=1 SV=1	Red	0.30964		-0.124328
Pre-frontal cortex	O89046	Coro1b	Coronin-1B OS=Rattus norvegicus OX=10116 GN=Coro1b PE=1 SV=1	Red	0.30986		0.184425
Pre-frontal cortex	A0A0G2JV04	Gga3	ADP-ribosylation factor-binding protein GGA3 OS=Rattus norvegicus OX=10116 GN=Gga3 PE=1 SV=1	Red	0.31157		-0.367371
Pre-frontal cortex	P29411	Ak3	GTP:AMP phosphotransferase AK3, mitochondrial OS=Rattus norvegicus OX=10116 GN=Ak3 PE=2 SV=2	Red	0.31256		-0.422233
Pre-frontal cortex	Q924S5	Lonp1	Lon protease homolog, mitochondrial OS=Rattus norvegicus OX=10116 GN=Lonp1 PE=2 SV=1	Red	0.31291		0.217591
Pre-frontal cortex	P13852	Prnp	Major prion protein OS=Rattus norvegicus OX=10116 GN=Prnp PE=1 SV=2	Red	0.31301		0.251539
Pre-frontal cortex	Q566R0	Them4	Acyl-coenzyme A thioesterase THEM4 OS=Rattus norvegicus OX=10116 GN=Them4 PE=2 SV=1	Red	0.31538		-0.15056
Pre-frontal cortex	Q62688	Plcl1	Inactive phospholipase C-like protein 1 OS=Rattus norvegicus OX=10116 GN=Plcl1 PE=1 SV=1	Red	0.31635		-0.298658
Pre-frontal cortex	P16617	Pgk1	Phosphoglycerate kinase 1 OS=Rattus norvegicus OX=10116 GN=Pgk1 PE=1 SV=2	Red	0.31751		0.0588937
Pre-frontal cortex	P82471	Gnaq	Guanine nucleotide-binding protein G(q) subunit alpha OS=Rattus norvegicus OX=10116 GN=Gnaq PE=2 SV=2	Red	0.31806		-0.333424
Pre-frontal cortex	Q63537	Syn2	Synapsin-2 OS=Rattus norvegicus OX=10116 GN=Syn2 PE=1 SV=1	Red	0.31947		0.200913
Pre-frontal cortex	P39069	Ak1	Adenylate kinase isoenzyme 1 OS=Rattus norvegicus OX=10116 GN=Ak1 PE=1 SV=3	Red	0.32149		0.200913
Pre-frontal cortex	P63018	Hspa8	Heat shock cognate 71 kDa protein OS=Rattus norvegicus OX=10116 GN=Hspa8 PE=1 SV=1	Red	0.32149		0.0740006
Pre-frontal cortex	Q5M7A7	Cnrip1	CB1 cannabinoid receptor-interacting protein 1 OS=Rattus norvegicus OX=10116 GN=Cnrip1 PE=1 SV=1	Red	0.32304		-0.0976108
Pre-frontal cortex	Q62825	Exoc3	Exocyst complex component 3 OS=Rattus norvegicus OX=10116 GN=Exoc3 PE=1 SV=1	Green	0.32421		0.915936
Pre-frontal cortex	Q9ER34	Aco2	Aconitate hydratase, mitochondrial OS=Rattus norvegicus OX=10116 GN=Aco2 PE=1 SV=2	Red	0.32509		0.0588937
Pre-frontal cortex	Q66H80	Arcn1	Coatomer subunit delta OS=Rattus norvegicus OX=10116 GN=Arcn1 PE=2 SV=1	Red	0.32544		-0.495695
Pre-frontal cortex	Q9Z0W5	Pacsin1	Protein kinase C and casein kinase substrate in neurons protein 1 OS=Rattus norvegicus OX=10116 GN=Pacsin1 PE=1 SV=1	Red	0.32593		0.0588937
Pre-frontal cortex	Q6AYE2	Sh3glb1	Endophilin-B1 OS=Rattus norvegicus OX=10116 GN=Sh3glb1 PE=2 SV=1	Red	0.32684		0.340075
Pre-frontal cortex	Q4KM65	Nudt21	Cleavage and polyadenylation specificity factor subunit 5 OS=Rattus norvegicus OX=10116 GN=Nudt21 PE=2 SV=1	Red	0.32849		0.200913
Pre-frontal cortex	F1LSG8	Vps50	Syndetin OS=Rattus norvegicus OX=10116 GN=Vps50 PE=1 SV=1	Red	0.32893		-0.505891
Pre-frontal cortex	Q6P7R8	Hsd17b12	Very-long-chain 3-oxoacyl-CoA reductase OS=Rattus norvegicus OX=10116 GN=Hsd17b12 PE=2 SV=1	Green	0.32917		-0.678072
Pre-frontal cortex	Q91Y78	Uchl3	Ubiquitin carboxyl-terminal hydrolase isozyme L3 OS=Rattus norvegicus OX=10116 GN=Uchl3 PE=1 SV=1	Red	0.32935		0.494109
Pre-frontal cortex	Q02589	Adprh	ADP-ribosylhydrolase ARH1 OS=Rattus norvegicus OX=10116 GN=Adprh PE=1 SV=2	Red	0.32962		0.168123
Pre-frontal cortex	P12001	Rpl18	60S ribosomal protein L18 OS=Rattus norvegicus OX=10116 GN=Rpl18 PE=1 SV=2	Red	0.33021		-0.226509
Pre-frontal cortex	P04644	Rps17	40S ribosomal protein S17 OS=Rattus norvegicus OX=10116 GN=Rps17 PE=1 SV=3	Red	0.33026		0.168123
Pre-frontal cortex	P85972	Vcl	Vinculin OS=Rattus norvegicus OX=10116 GN=Vcl PE=1 SV=1	Red	0.33049		0.304006
Pre-frontal cortex	A1L1I3	Numbl	Numb-like protein OS=Rattus norvegicus OX=10116 GN=Numbl PE=1 SV=1	Red	0.33126		-0.31034
Pre-frontal cortex	Q68FS2	Cops4	COP9 signalosome complex subunit 4 OS=Rattus norvegicus OX=10116 GN=Cops4 PE=1 SV=1	Red	0.33176		0.120294
Pre-frontal cortex	Q9Z339	Gsto1	Glutathione S-transferase omega-1 OS=Rattus norvegicus OX=10116 GN=Gsto1 PE=1 SV=2	Red	0.33377		0.104697
Pre-frontal cortex	Q6P7Q4	Glo1	Lactoylglutathione lyase OS=Rattus norvegicus OX=10116 GN=Glo1 PE=1 SV=3	Red	0.33413		-0.189034
Pre-frontal cortex	Q80Z29	Nampt	Nicotinamide phosphoribosyltransferase OS=Rattus norvegicus OX=10116 GN=Nampt PE=1 SV=1	Red	0.33418		-0.298658
Pre-frontal cortex	P07943	Akr1b1	Aldo-keto reductase family 1 member B1 OS=Rattus norvegicus OX=10116 GN=Akr1b1 PE=1 SV=3	Red	0.33649		-0.214125
Pre-frontal cortex	Q5HZE4	Mri1	Methylthioribose-1-phosphate isomerase OS=Rattus norvegicus OX=10116 GN=Mri1 PE=1 SV=1	Red	0.33783		-0.250962
Pre-frontal cortex	P63102	Ywhaz	14-3-3 protein zeta/delta OS=Rattus norvegicus OX=10116 GN=Ywhaz PE=1 SV=1	Red	0.3387		0.0439433
Pre-frontal cortex	Q4KLH4	Pspc1	Paraspeckle component 1 OS=Rattus norvegicus OX=10116 GN=Pspc1 PE=1 SV=1	Red	0.3388		0.304006
Pre-frontal cortex	P63074	Eif4e	Eukaryotic translation initiation factor 4E OS=Rattus norvegicus OX=10116 GN=Eif4e PE=1 SV=1	Red	0.3391		0.184425
Pre-frontal cortex	Q9JLA3	Uggt1	UDP-glucose:glycoprotein glucosyltransferase 1 OS=Rattus norvegicus OX=10116 GN=Uggt1 PE=1 SV=2	Red	0.34092		-0.286881
Pre-frontal cortex	P14669	Anxa3	Annexin A3 OS=Rattus norvegicus OX=10116 GN=Anxa3 PE=1 SV=4	Red	0.34111		-0.454176
Pre-frontal cortex	P26284	Pdha1	Pyruvate dehydrogenase E1 component subunit alpha, somatic form, mitochondrial OS=Rattus norvegicus OX=10116 GN=Pdha1 PE=1 SV=2	Red	0.34125		-0.124328
Pre-frontal cortex	O70351	Hsd17b10	3-hydroxyacyl-CoA dehydrogenase type-2 OS=Rattus norvegicus OX=10116 GN=Hsd17b10 PE=1 SV=3	Red	0.34136		0.152003
Pre-frontal cortex	B0LT89	Stk24	Serine/threonine-protein kinase 24 OS=Rattus norvegicus OX=10116 GN=Stk24 PE=2 SV=1	Red	0.34208		0.104697
Pre-frontal cortex	P47728	Calb2	Calretinin OS=Rattus norvegicus OX=10116 GN=Calb2 PE=1 SV=1	Red	0.3422		0.217591
Pre-frontal cortex	Q1M168	Atcay	Caytaxin OS=Rattus norvegicus OX=10116 GN=Atcay PE=1 SV=1	Red	0.34327		0.184425
Pre-frontal cortex	Q8K1Q0	Nmt1	Glycylpeptide N-tetradecanoyltransferase 1 OS=Rattus norvegicus OX=10116 GN=Nmt1 PE=1 SV=1	Red	0.34332		0.168123
Pre-frontal cortex	P27867	Sord	Sorbitol dehydrogenase OS=Rattus norvegicus OX=10116 GN=Sord PE=1 SV=4	Red	0.34358		0.152003
Pre-frontal cortex	Q9QYL8	Lypla2	Acyl-protein thioesterase 2 OS=Rattus norvegicus OX=10116 GN=Lypla2 PE=1 SV=1	Red	0.34435		-0.189034
Pre-frontal cortex	B1H267	Snx5	Sorting nexin-5 OS=Rattus norvegicus OX=10116 GN=Snx5 PE=1 SV=1	Red	0.34438		0.454032
Pre-frontal cortex	P22831	Synpr	Synaptoporin OS=Rattus norvegicus OX=10116 GN=Synpr PE=1 SV=2	Red	0.34702		-0.189034
Pre-frontal cortex	Q02563	Sv2a	Synaptic vesicle glycoprotein 2A OS=Rattus norvegicus OX=10116 GN=Sv2a PE=1 SV=2	Red	0.34762		-0.189034
Pre-frontal cortex	Q6AYN4	Phyhipl	Phytanoyl-CoA hydroxylase-interacting protein-like OS=Rattus norvegicus OX=10116 GN=Phyhipl PE=1 SV=2	Red	0.34936		0.104697
Pre-frontal cortex	Q66HL2	Cttn	Src substrate cortactin OS=Rattus norvegicus OX=10116 GN=Cttn PE=1 SV=1	Red	0.34989		-0.0703893
Pre-frontal cortex	P63081	Atp6v0c	V-type proton ATPase 16 kDa proteolipid subunit c OS=Rattus norvegicus OX=10116 GN=Atp6v0c PE=1 SV=1	Red	0.34993		-0.378512
Pre-frontal cortex	O88506	Stk39	STE20/SPS1-related proline-alanine-rich protein kinase OS=Rattus norvegicus OX=10116 GN=Stk39 PE=1 SV=2	Red	0.35101		0.136062
Pre-frontal cortex	B1WC61	Acad9	Complex I assembly factor ACAD9, mitochondrial OS=Rattus norvegicus OX=10116 GN=Acad9 PE=1 SV=1	Red	0.35112		-0.214125
Pre-frontal cortex	P13697	Me1	NADP-dependent malic enzyme OS=Rattus norvegicus OX=10116 GN=Me1 PE=1 SV=2	Red	0.35151		0.152003
Pre-frontal cortex	Q4KM49	Yars1	Tyrosine--tRNA ligase, cytoplasmic OS=Rattus norvegicus OX=10116 GN=Yars1 PE=2 SV=3	Red	0.3516		0.120294
Pre-frontal cortex	P20760	Igg-2a	Ig gamma-2A chain C region OS=Rattus norvegicus OX=10116 GN=Igg-2a PE=1 SV=1	Red	0.35227		-0.275007
Pre-frontal cortex	P24329	Tst	Thiosulfate sulfurtransferase OS=Rattus norvegicus OX=10116 GN=Tst PE=1 SV=3	Red	0.35283		-0.0840643
Pre-frontal cortex	P70567	Tmod1	Tropomodulin-1 OS=Rattus norvegicus OX=10116 GN=Tmod1 PE=2 SV=1	Red	0.35289		0.321928
Pre-frontal cortex	Q5XFW8	Sec13	Protein SEC13 homolog OS=Rattus norvegicus OX=10116 GN=Sec13 PE=1 SV=1	Red	0.35309		-0.137504
Pre-frontal cortex	Q5I0D1	Glod4	Glyoxalase domain-containing protein 4 OS=Rattus norvegicus OX=10116 GN=Glod4 PE=1 SV=1	Red	0.35364		-0.111031
Pre-frontal cortex	P85970	Arpc2	Actin-related protein 2/3 complex subunit 2 OS=Rattus norvegicus OX=10116 GN=Arpc2 PE=1 SV=1	Red	0.35367		-0.0976108
Pre-frontal cortex	P97576	Grpel1	GrpE protein homolog 1, mitochondrial OS=Rattus norvegicus OX=10116 GN=Grpel1 PE=1 SV=2	Red	0.35385		0.104697
Pre-frontal cortex	O35179	Sh3gl2	Endophilin-A1 OS=Rattus norvegicus OX=10116 GN=Sh3gl2 PE=1 SV=2	Red	0.35455		0.0892673
Pre-frontal cortex	A2VCX1	Tiprl	TIP41-like protein OS=Rattus norvegicus OX=10116 GN=Tiprl PE=1 SV=1	Red	0.35464		0.152003
Pre-frontal cortex	P14882	Pcca	Propionyl-CoA carboxylase alpha chain, mitochondrial OS=Rattus norvegicus OX=10116 GN=Pcca PE=1 SV=3	Red	0.35584		0.268817
Pre-frontal cortex	Q4V7C6	Gmps	GMP synthase [glutamine-hydrolyzing] OS=Rattus norvegicus OX=10116 GN=Gmps PE=1 SV=1	Red	0.35706		0.234465
Pre-frontal cortex	P24054	Sparcl1	SPARC-like protein 1 OS=Rattus norvegicus OX=10116 GN=Sparcl1 PE=1 SV=1	Red	0.3575		0.200913
Pre-frontal cortex	Q64548	Rtn1	Reticulon-1 OS=Rattus norvegicus OX=10116 GN=Rtn1 PE=1 SV=1	Red	0.35763		0.0740006
Pre-frontal cortex	O88794	Pnpo	Pyridoxine-5'-phosphate oxidase OS=Rattus norvegicus OX=10116 GN=Pnpo PE=1 SV=1	Red	0.35799		0.120294
Pre-frontal cortex	Q7TP98	Ilf2	Interleukin enhancer-binding factor 2 OS=Rattus norvegicus OX=10116 GN=Ilf2 PE=2 SV=1	Red	0.358		0.217591
Pre-frontal cortex	Q6J4I0	Ppp1r1b	Protein phosphatase 1 regulatory subunit 1B OS=Rattus norvegicus OX=10116 GN=Ppp1r1b PE=1 SV=1	Red	0.35918		-0.176323
Pre-frontal cortex	Q5U2N3	Pitpnm1	Membrane-associated phosphatidylinositol transfer protein 1 OS=Rattus norvegicus OX=10116 GN=Pitpnm1 PE=1 SV=1	Red	0.36029		0.304006
Pre-frontal cortex	P21707	Syt1	Synaptotagmin-1 OS=Rattus norvegicus OX=10116 GN=Syt1 PE=1 SV=3	Red	0.36045		-0.163499
Pre-frontal cortex	Q792I0	Lin7c	Protein lin-7 homolog C OS=Rattus norvegicus OX=10116 GN=Lin7c PE=1 SV=1	Red	0.36057		0.104697
Pre-frontal cortex	Q04631	Fnta	Protein farnesyltransferase/geranylgeranyltransferase type-1 subunit alpha OS=Rattus norvegicus OX=10116 GN=Fnta PE=1 SV=1	Red	0.36095		0.200913
Pre-frontal cortex	Q62824	Exoc4	Exocyst complex component 4 OS=Rattus norvegicus OX=10116 GN=Exoc4 PE=1 SV=1	Red	0.36114		0.234465
Pre-frontal cortex	Q568Z9	Phyhip	Phytanoyl-CoA hydroxylase-interacting protein OS=Rattus norvegicus OX=10116 GN=Phyhip PE=2 SV=1	Red	0.36139		0.0588937
Pre-frontal cortex	Q63569	Psmc3	26S proteasome regulatory subunit 6A OS=Rattus norvegicus OX=10116 GN=Psmc3 PE=1 SV=1	Red	0.36187		0.104697
Pre-frontal cortex	P01830	Thy1	Thy-1 membrane glycoprotein OS=Rattus norvegicus OX=10116 GN=Thy1 PE=1 SV=1	Red	0.36253		-0.226509
Pre-frontal cortex	Q63610	Tpm3	Tropomyosin alpha-3 chain OS=Rattus norvegicus OX=10116 GN=Tpm3 PE=1 SV=2	Red	0.36311		-0.0840643
Pre-frontal cortex	Q63941	Rab3b	Ras-related protein Rab-3B OS=Rattus norvegicus OX=10116 GN=Rab3b PE=1 SV=2	Red	0.36384		-0.0426443
Pre-frontal cortex	B5DEN9	Vps28	Vacuolar protein sorting-associated protein 28 homolog OS=Rattus norvegicus OX=10116 GN=Vps28 PE=2 SV=1	Red	0.364		0.268817
Pre-frontal cortex	P62271	Rps18	40S ribosomal protein S18 OS=Rattus norvegicus OX=10116 GN=Rps18 PE=1 SV=3	Red	0.36424		-0.0840643
Pre-frontal cortex	P13084	Npm1	Nucleophosmin OS=Rattus norvegicus OX=10116 GN=Npm1 PE=1 SV=1	Red	0.36501		0.120294
Pre-frontal cortex	P97612	Faah	Fatty-acid amide hydrolase 1 OS=Rattus norvegicus OX=10116 GN=Faah PE=1 SV=1	Red	0.36616		0.434403
Pre-frontal cortex	Q6IRE4	Tsg101	Tumor susceptibility gene 101 protein OS=Rattus norvegicus OX=10116 GN=Tsg101 PE=1 SV=1	Red	0.36634		0.184425
Pre-frontal cortex	Q5XHZ0	Trap1	Heat shock protein 75 kDa, mitochondrial OS=Rattus norvegicus OX=10116 GN=Trap1 PE=1 SV=1	Red	0.36739		0.184425
Pre-frontal cortex	Q68FX0	Idh3B	Isocitrate dehydrogenase [NAD] subunit beta, mitochondrial OS=Rattus norvegicus OX=10116 GN=Idh3B PE=2 SV=1	Red	0.36774		-0.0703893
Pre-frontal cortex	P35332	Hpcal4	Hippocalcin-like protein 4 OS=Rattus norvegicus OX=10116 GN=Hpcal4 PE=2 SV=2	Red	0.36819		-0.0703893
Pre-frontal cortex	P32851	Stx1a	Syntaxin-1A OS=Rattus norvegicus OX=10116 GN=Stx1a PE=1 SV=1	Red	0.36838		-0.0703893
Pre-frontal cortex	O35094	Timm44	Mitochondrial import inner membrane translocase subunit TIM44 OS=Rattus norvegicus OX=10116 GN=Timm44 PE=1 SV=1	Red	0.37035		0.286304
Pre-frontal cortex	P62282	Rps11	40S ribosomal protein S11 OS=Rattus norvegicus OX=10116 GN=Rps11 PE=1 SV=3	Red	0.37059		0.136062
Pre-frontal cortex	P10111	Ppia	Peptidyl-prolyl cis-trans isomerase A OS=Rattus norvegicus OX=10116 GN=Ppia PE=1 SV=2	Red	0.3711		-0.0426443
Pre-frontal cortex	P17702	Rpl28	60S ribosomal protein L28 OS=Rattus norvegicus OX=10116 GN=Rpl28 PE=1 SV=4	Red	0.37166		0.268817
Pre-frontal cortex	P10687	Plcb1	1-phosphatidylinositol 4,5-bisphosphate phosphodiesterase beta-1 OS=Rattus norvegicus OX=10116 GN=Plcb1 PE=1 SV=1	Red	0.37178		-0.189034
Pre-frontal cortex	Q6PDU1	Srsf2	Serine/arginine-rich splicing factor 2 OS=Rattus norvegicus OX=10116 GN=Srsf2 PE=1 SV=3	Red	0.37203		0.0892673
Pre-frontal cortex	Q4G061	Eif3b	Eukaryotic translation initiation factor 3 subunit B OS=Rattus norvegicus OX=10116 GN=Eif3b PE=1 SV=1	Red	0.37228		-0.275007
Pre-frontal cortex	P61227	Rap2b	Ras-related protein Rap-2b OS=Rattus norvegicus OX=10116 GN=Rap2b PE=2 SV=1	Red	0.37308		-0.250962
Pre-frontal cortex	P35565	Canx	Calnexin OS=Rattus norvegicus OX=10116 GN=Canx PE=1 SV=1	Red	0.37456		-0.214125
Pre-frontal cortex	P12075	Cox5b	Cytochrome c oxidase subunit 5B, mitochondrial OS=Rattus norvegicus OX=10116 GN=Cox5b PE=1 SV=2	Red	0.37497		0.217591
Pre-frontal cortex	P32551	Uqcrc2	Cytochrome b-c1 complex subunit 2, mitochondrial OS=Rattus norvegicus OX=10116 GN=Uqcrc2 PE=1 SV=2	Red	0.37522		0.217591
Pre-frontal cortex	Q5FVM4	Nono	Non-POU domain-containing octamer-binding protein OS=Rattus norvegicus OX=10116 GN=Nono PE=1 SV=3	Red	0.37535		-0.124328
Pre-frontal cortex	Q68FX9	Sirt5	NAD-dependent protein deacylase sirtuin-5, mitochondrial OS=Rattus norvegicus OX=10116 GN=Sirt5 PE=2 SV=1	Red	0.37578		0.0892673
Pre-frontal cortex	Q6AXT5	Rab21	Ras-related protein Rab-21 OS=Rattus norvegicus OX=10116 GN=Rab21 PE=2 SV=1	Red	0.37592		0.234465
Pre-frontal cortex	Q4V8B0	Oxr1	Oxidation resistance protein 1 OS=Rattus norvegicus OX=10116 GN=Oxr1 PE=1 SV=3	Red	0.37679		-0.137504
Pre-frontal cortex	B2RYG6	Otub1	Ubiquitin thioesterase OTUB1 OS=Rattus norvegicus OX=10116 GN=Otub1 PE=1 SV=1	Red	0.37775		0.0740006
Pre-frontal cortex	Q62826	Hnrnpm	Heterogeneous nuclear ribonucleoprotein M OS=Rattus norvegicus OX=10116 GN=Hnrnpm PE=1 SV=4	Red	0.378		0.136062
Pre-frontal cortex	Q63692	Cdc37	Hsp90 co-chaperone Cdc37 OS=Rattus norvegicus OX=10116 GN=Cdc37 PE=1 SV=2	Red	0.37864		0.0892673
Pre-frontal cortex	Q6PCT3	Tpd52l2	Tumor protein D54 OS=Rattus norvegicus OX=10116 GN=Tpd52l2 PE=1 SV=1	Red	0.37923		0.120294
Pre-frontal cortex	B3DMA0	Tp53i11	Tumor protein p53-inducible protein 11 OS=Rattus norvegicus OX=10116 GN=Tp53i11 PE=1 SV=1	Red	0.37968		-0.367371
Pre-frontal cortex	P83953	Kpna1	Importin subunit alpha-5 OS=Rattus norvegicus OX=10116 GN=Kpna1 PE=1 SV=1	Red	0.38		0.120294
Pre-frontal cortex	P35281	Rab10	Ras-related protein Rab-10 OS=Rattus norvegicus OX=10116 GN=Rab10 PE=1 SV=1	Red	0.38068		-0.15056
Pre-frontal cortex	Q4QRB4	Tubb3	Tubulin beta-3 chain OS=Rattus norvegicus OX=10116 GN=Tubb3 PE=1 SV=1	Red	0.3846		0.0291463
Pre-frontal cortex	A1L108	Arpc5l	Actin-related protein 2/3 complex subunit 5-like protein OS=Rattus norvegicus OX=10116 GN=Arpc5l PE=1 SV=2	Red	0.38666		-0.137504
Pre-frontal cortex	Q3B8Q0	Mapre2	Microtubule-associated protein RP/EB family member 2 OS=Rattus norvegicus OX=10116 GN=Mapre2 PE=1 SV=1	Red	0.38667		-0.0703893
Pre-frontal cortex	O08700	Vps45	Vacuolar protein sorting-associated protein 45 OS=Rattus norvegicus OX=10116 GN=Vps45 PE=1 SV=1	Red	0.38686		0.251539
Pre-frontal cortex	P15650	Acadl	Long-chain specific acyl-CoA dehydrogenase, mitochondrial OS=Rattus norvegicus OX=10116 GN=Acadl PE=1 SV=1	Red	0.38719		-0.238787
Pre-frontal cortex	P62083	Rps7	40S ribosomal protein S7 OS=Rattus norvegicus OX=10116 GN=Rps7 PE=1 SV=1	Red	0.38741		0.0588937
Pre-frontal cortex	Q5XI32	Capzb	F-actin-capping protein subunit beta OS=Rattus norvegicus OX=10116 GN=Capzb PE=1 SV=1	Red	0.3894		-0.0426443
Pre-frontal cortex	Q6PST4	Atl1	Atlastin-1 OS=Rattus norvegicus OX=10116 GN=Atl1 PE=1 SV=1	Red	0.38985		0.0588937
Pre-frontal cortex	P40307	Psmb2	Proteasome subunit beta type-2 OS=Rattus norvegicus OX=10116 GN=Psmb2 PE=1 SV=1	Red	0.39227		-0.0565835
Pre-frontal cortex	Q921A4	Cygb	Cytoglobin OS=Rattus norvegicus OX=10116 GN=Cygb PE=1 SV=1	Red	0.39581		0.234465
Pre-frontal cortex	P04785	P4hb	Protein disulfide-isomerase OS=Rattus norvegicus OX=10116 GN=P4hb PE=1 SV=2	Red	0.39593		0.0740006
Pre-frontal cortex	P18395	Csde1	Cold shock domain-containing protein E1 OS=Rattus norvegicus OX=10116 GN=Csde1 PE=2 SV=1	Red	0.39609		-0.111031
Pre-frontal cortex	O88377	Pip4k2b	Phosphatidylinositol 5-phosphate 4-kinase type-2 beta OS=Rattus norvegicus OX=10116 GN=Pip4k2b PE=1 SV=1	Red	0.397		-0.0703893
Pre-frontal cortex	P09216	Prkce	Protein kinase C epsilon type OS=Rattus norvegicus OX=10116 GN=Prkce PE=1 SV=1	Red	0.39911		-0.0703893
Pre-frontal cortex	P43138	Apex1	DNA-(apurinic or apyrimidinic site) endonuclease OS=Rattus norvegicus OX=10116 GN=Apex1 PE=1 SV=2	Red	0.3992		0.395929
Pre-frontal cortex	P28073	Psmb6	Proteasome subunit beta type-6 OS=Rattus norvegicus OX=10116 GN=Psmb6 PE=1 SV=3	Red	0.39963		0.0588937
Pre-frontal cortex	Q9Z0W7	Clic4	Chloride intracellular channel protein 4 OS=Rattus norvegicus OX=10116 GN=Clic4 PE=1 SV=3	Red	0.40058		-0.226509
Pre-frontal cortex	F1M4A4	Kif1a	Kinesin-like protein KIF1A OS=Rattus norvegicus OX=10116 GN=Kif1a PE=1 SV=3	Red	0.4014		0.104697
Pre-frontal cortex	Q4G017	Nisch	Nischarin OS=Rattus norvegicus OX=10116 GN=Nisch PE=2 SV=2	Red	0.40145		0.200913
Pre-frontal cortex	P04646	Rpl35a	60S ribosomal protein L35a OS=Rattus norvegicus OX=10116 GN=Rpl35a PE=3 SV=1	Red	0.40299		-0.176323
Pre-frontal cortex	Q6PEC1	Tbca	Tubulin-specific chaperone A OS=Rattus norvegicus OX=10116 GN=Tbca PE=1 SV=1	Red	0.40337		-0.111031
Pre-frontal cortex	P18265	Gsk3a	Glycogen synthase kinase-3 alpha OS=Rattus norvegicus OX=10116 GN=Gsk3a PE=1 SV=1	Red	0.40349		0.0588937
Pre-frontal cortex	P29315	Rnh1	Ribonuclease inhibitor OS=Rattus norvegicus OX=10116 GN=Rnh1 PE=1 SV=2	Red	0.40437		0.136062
Pre-frontal cortex	P07633	Pccb	Propionyl-CoA carboxylase beta chain, mitochondrial OS=Rattus norvegicus OX=10116 GN=Pccb PE=2 SV=1	Red	0.4085		-0.111031
Pre-frontal cortex	P25113	Pgam1	Phosphoglycerate mutase 1 OS=Rattus norvegicus OX=10116 GN=Pgam1 PE=1 SV=4	Red	0.40867		0.0291463
Pre-frontal cortex	P63041	Cplx1	Complexin-1 OS=Rattus norvegicus OX=10116 GN=Cplx1 PE=1 SV=1	Red	0.40987		-0.0565835
Pre-frontal cortex	P49911	Anp32a	Acidic leucine-rich nuclear phosphoprotein 32 family member A OS=Rattus norvegicus OX=10116 GN=Anp32a PE=2 SV=1	Red	0.41001		0.104697
Pre-frontal cortex	Q920J4	Txnl1	Thioredoxin-like protein 1 OS=Rattus norvegicus OX=10116 GN=Txnl1 PE=1 SV=3	Red	0.41035		0.0291463
Pre-frontal cortex	D3ZVR7	Prxl2b	Prostamide/prostaglandin F synthase OS=Rattus norvegicus OX=10116 GN=Prxl2b PE=3 SV=1	Red	0.41107		0.136062
Pre-frontal cortex	P13234	Camk4	Calcium/calmodulin-dependent protein kinase type IV OS=Rattus norvegicus OX=10116 GN=Camk4 PE=1 SV=3	Red	0.41254		0.0892673
Pre-frontal cortex	Q63484	Akt3	RAC-gamma serine/threonine-protein kinase OS=Rattus norvegicus OX=10116 GN=Akt3 PE=2 SV=2	Red	0.41488		0.0892673
Pre-frontal cortex	Q5HZV9	Ppp1r7	Protein phosphatase 1 regulatory subunit 7 OS=Rattus norvegicus OX=10116 GN=Ppp1r7 PE=1 SV=1	Red	0.41605		-0.0565835
Pre-frontal cortex	P34926	Map1a	Microtubule-associated protein 1A OS=Rattus norvegicus OX=10116 GN=Map1a PE=1 SV=1	Red	0.4162		0.0291463
Pre-frontal cortex	Q4V8F9	Hsdl2	Hydroxysteroid dehydrogenase-like protein 2 OS=Rattus norvegicus OX=10116 GN=Hsdl2 PE=2 SV=1	Red	0.41719		-0.124328
Pre-frontal cortex	P85969	Napb	Beta-soluble NSF attachment protein OS=Rattus norvegicus OX=10116 GN=Napb PE=1 SV=1	Red	0.41769		-0.0703893
Pre-frontal cortex	P31044	Pebp1	Phosphatidylethanolamine-binding protein 1 OS=Rattus norvegicus OX=10116 GN=Pebp1 PE=1 SV=3	Red	0.4186		0.0291463
Pre-frontal cortex	P62744	Ap2s1	AP-2 complex subunit sigma OS=Rattus norvegicus OX=10116 GN=Ap2s1 PE=1 SV=1	Red	0.41943		-0.0840643
Pre-frontal cortex	P62024	Phactr1	Phosphatase and actin regulator 1 OS=Rattus norvegicus OX=10116 GN=Phactr1 PE=1 SV=1	Red	0.41984		0.0740006
Pre-frontal cortex	Q9WTT6	Gda	Guanine deaminase OS=Rattus norvegicus OX=10116 GN=Gda PE=1 SV=1	Red	0.42014		0.0291463
Pre-frontal cortex	P63039	Hspd1	60 kDa heat shock protein, mitochondrial OS=Rattus norvegicus OX=10116 GN=Hspd1 PE=1 SV=1	Red	0.421		0.0291463
Pre-frontal cortex	Q9JJP9	Ubqln1	Ubiquilin-1 OS=Rattus norvegicus OX=10116 GN=Ubqln1 PE=1 SV=1	Red	0.4217		0.104697
Pre-frontal cortex	Q9QZM5	Abi1	Abl interactor 1 OS=Rattus norvegicus OX=10116 GN=Abi1 PE=1 SV=3	Red	0.4226		-0.0703893
Pre-frontal cortex	Q5U2R0	Mat2b	Methionine adenosyltransferase 2 subunit beta OS=Rattus norvegicus OX=10116 GN=Mat2b PE=2 SV=1	Red	0.42344		-0.163499
Pre-frontal cortex	P63012	Rab3a	Ras-related protein Rab-3A OS=Rattus norvegicus OX=10116 GN=Rab3a PE=1 SV=1	Red	0.42504		0.0439433
Pre-frontal cortex	Q6AY65	Arfip2	Arfaptin-2 OS=Rattus norvegicus OX=10116 GN=Arfip2 PE=2 SV=1	Red	0.42648		0.152003
Pre-frontal cortex	B0BN85	Sugt1	Protein SGT1 homolog OS=Rattus norvegicus OX=10116 GN=Sugt1 PE=2 SV=1	Red	0.42653		-0.0565835
Pre-frontal cortex	Q498R7	Czib	CXXC motif containing zinc binding protein OS=Rattus norvegicus OX=10116 GN=Czib PE=2 SV=1	Red	0.42695		-0.0840643
Pre-frontal cortex	P61265	Stx1b	Syntaxin-1B OS=Rattus norvegicus OX=10116 GN=Stx1b PE=1 SV=1	Red	0.42854		0.0588937
Pre-frontal cortex	P01041	Cstb	Cystatin-B OS=Rattus norvegicus OX=10116 GN=Cstb PE=1 SV=1	Red	0.42892		0.0439433
Pre-frontal cortex	P23978	Slc6a1	Sodium- and chloride-dependent GABA transporter 1 OS=Rattus norvegicus OX=10116 GN=Slc6a1 PE=1 SV=1	Red	0.43118		-0.163499
Pre-frontal cortex	Q6RUV5	Rac1	Ras-related C3 botulinum toxin substrate 1 OS=Rattus norvegicus OX=10116 GN=Rac1 PE=1 SV=1	Red	0.43121		0.0740006
Pre-frontal cortex	Q63228	Gmfb	Glia maturation factor beta OS=Rattus norvegicus OX=10116 GN=Gmfb PE=1 SV=2	Red	0.4325		0.0291463
Pre-frontal cortex	Q5U316	Rab35	Ras-related protein Rab-35 OS=Rattus norvegicus OX=10116 GN=Rab35 PE=1 SV=1	Red	0.43324		-0.124328
Pre-frontal cortex	O55148	Gas7	Growth arrest-specific protein 7 OS=Rattus norvegicus OX=10116 GN=Gas7 PE=2 SV=2	Red	0.43495		0.0892673
Pre-frontal cortex	P45592	Cfl1	Cofilin-1 OS=Rattus norvegicus OX=10116 GN=Cfl1 PE=1 SV=3	Red	0.43513		-0.0285692
Pre-frontal cortex	P31016	Dlg4	Disks large homolog 4 OS=Rattus norvegicus OX=10116 GN=Dlg4 PE=1 SV=1	Red	0.4362		0.0740006
Pre-frontal cortex	Q8VI04	Asrgl1	Isoaspartyl peptidase/L-asparaginase OS=Rattus norvegicus OX=10116 GN=Asrgl1 PE=1 SV=1	Red	0.43734		0.0439433
Pre-frontal cortex	Q64119	Myl6	Myosin light polypeptide 6 OS=Rattus norvegicus OX=10116 GN=Myl6 PE=1 SV=3	Red	0.43836		0.104697
Pre-frontal cortex	Q5I0G4	Gars1	Glycine--tRNA ligase OS=Rattus norvegicus OX=10116 GN=Gars1 PE=1 SV=2	Red	0.43864		-0.0565835
Pre-frontal cortex	P63331	Ppp2ca	Serine/threonine-protein phosphatase 2A catalytic subunit alpha isoform OS=Rattus norvegicus OX=10116 GN=Ppp2ca PE=1 SV=1	Red	0.4399		0.0291463
Pre-frontal cortex	Q9JMB5	Adrm1	Proteasomal ubiquitin receptor ADRM1 OS=Rattus norvegicus OX=10116 GN=Adrm1 PE=1 SV=2	Red	0.44014		-0.0565835
Pre-frontal cortex	P37377	Snca	Alpha-synuclein OS=Rattus norvegicus OX=10116 GN=Snca PE=1 SV=1	Red	0.44032		0.104697
Pre-frontal cortex	P14668	Anxa5	Annexin A5 OS=Rattus norvegicus OX=10116 GN=Anxa5 PE=1 SV=3	Red	0.44159		-0.0840643
Pre-frontal cortex	D3ZUQ0	Rilpl1	RILP-like protein 1 OS=Rattus norvegicus OX=10116 GN=Rilpl1 PE=1 SV=1	Red	0.44159		0.0892673
Pre-frontal cortex	P51635	Akr1a1	Aldo-keto reductase family 1 member A1 OS=Rattus norvegicus OX=10116 GN=Akr1a1 PE=1 SV=2	Red	0.44246		-0.0426443
Pre-frontal cortex	Q07647	Slc2a3	Solute carrier family 2, facilitated glucose transporter member 3 OS=Rattus norvegicus OX=10116 GN=Slc2a3 PE=1 SV=1	Red	0.44253		-0.163499
Pre-frontal cortex	Q9QVC8	Fkbp4	Peptidyl-prolyl cis-trans isomerase FKBP4 OS=Rattus norvegicus OX=10116 GN=Fkbp4 PE=1 SV=3	Red	0.44284		0.0892673
Pre-frontal cortex	Q6AY41	Tmem30a	Cell cycle control protein 50A OS=Rattus norvegicus OX=10116 GN=Tmem30a PE=1 SV=1	Red	0.4463		-0.0840643
Pre-frontal cortex	P11030	Dbi	Acyl-CoA-binding protein OS=Rattus norvegicus OX=10116 GN=Dbi PE=1 SV=3	Red	0.44643		0.0291463
Pre-frontal cortex	P62332	Arf6	ADP-ribosylation factor 6 OS=Rattus norvegicus OX=10116 GN=Arf6 PE=1 SV=2	Red	0.44822		0.0588937
Pre-frontal cortex	B0K020	Cisd1	CDGSH iron-sulfur domain-containing protein 1 OS=Rattus norvegicus OX=10116 GN=Cisd1 PE=3 SV=1	Red	0.44899		-0.0840643
Pre-frontal cortex	Q62940	Nedd4	E3 ubiquitin-protein ligase NEDD4 OS=Rattus norvegicus OX=10116 GN=Nedd4 PE=1 SV=1	Red	0.44912		0.184425
Pre-frontal cortex	P85834	Tufm	Elongation factor Tu, mitochondrial OS=Rattus norvegicus OX=10116 GN=Tufm PE=1 SV=1	Red	0.44993		0.0144996
Pre-frontal cortex	P19234	Ndufv2	NADH dehydrogenase [ubiquinone] flavoprotein 2, mitochondrial OS=Rattus norvegicus OX=10116 GN=Ndufv2 PE=1 SV=2	Red	0.45001		-0.0840643
Pre-frontal cortex	P86252	Pura	Transcriptional activator protein Pur-alpha (Fragments) OS=Rattus norvegicus OX=10116 GN=Pura PE=1 SV=1	Red	0.45172		0.0291463
Pre-frontal cortex	P53534	Pygb	Glycogen phosphorylase, brain form (Fragment) OS=Rattus norvegicus OX=10116 GN=Pygb PE=1 SV=3	Red	0.4525		-0.0143553
Pre-frontal cortex	P21913	Sdhb	Succinate dehydrogenase [ubiquinone] iron-sulfur subunit, mitochondrial OS=Rattus norvegicus OX=10116 GN=Sdhb PE=2 SV=2	Red	0.45501		-0.0840643
Pre-frontal cortex	O35458	Slc32a1	Vesicular inhibitory amino acid transporter OS=Rattus norvegicus OX=10116 GN=Slc32a1 PE=1 SV=1	Red	0.45565		0.104697
Pre-frontal cortex	O35274	Ppp1r9b	Neurabin-2 OS=Rattus norvegicus OX=10116 GN=Ppp1r9b PE=1 SV=1	Red	0.45643		0.0439433
Pre-frontal cortex	O35796	C1qbp	Complement component 1 Q subcomponent-binding protein, mitochondrial OS=Rattus norvegicus OX=10116 GN=C1qbp PE=1 SV=2	Red	0.45654		0.0291463
Pre-frontal cortex	P00406	Mtco2	Cytochrome c oxidase subunit 2 OS=Rattus norvegicus OX=10116 GN=Mtco2 PE=1 SV=3	Red	0.45721		-0.0840643
Pre-frontal cortex	Q9QUL6	Nsf	Vesicle-fusing ATPase OS=Rattus norvegicus OX=10116 GN=Nsf PE=1 SV=1	Red	0.45761		0.0144996
Pre-frontal cortex	Q66HA6	Arl8b	ADP-ribosylation factor-like protein 8B OS=Rattus norvegicus OX=10116 GN=Arl8b PE=2 SV=1	Red	0.45799		-0.0426443
Pre-frontal cortex	P62749	Hpcal1	Hippocalcin-like protein 1 OS=Rattus norvegicus OX=10116 GN=Hpcal1 PE=1 SV=2	Red	0.45912		-0.0840643
Pre-frontal cortex	P54313	Gnb2	Guanine nucleotide-binding protein G(I)/G(S)/G(T) subunit beta-2 OS=Rattus norvegicus OX=10116 GN=Gnb2 PE=1 SV=4	Red	0.45916		0.0439433
Pre-frontal cortex	Q6XVN8	Map1lc3a	Microtubule-associated proteins 1A/1B light chain 3A OS=Rattus norvegicus OX=10116 GN=Map1lc3a PE=1 SV=1	Red	0.45921		0.0291463
Pre-frontal cortex	P30904	Mif	Macrophage migration inhibitory factor OS=Rattus norvegicus OX=10116 GN=Mif PE=1 SV=4	Red	0.45994		-0.0703893
Pre-frontal cortex	P12785	Fasn	Fatty acid synthase OS=Rattus norvegicus OX=10116 GN=Fasn PE=1 SV=3	Red	0.46005		0.0439433
Pre-frontal cortex	P63055	Pcp4	Calmodulin regulator protein PCP4 OS=Rattus norvegicus OX=10116 GN=Pcp4 PE=1 SV=2	Red	0.46064		-0.0143553
Pre-frontal cortex	P08009	Gstm7	Glutathione S-transferase Mu 7 OS=Rattus norvegicus OX=10116 GN=Gstm7 PE=1 SV=2	Red	0.46065		0.0144996
Pre-frontal cortex	Q3KRD5	Tomm34	Mitochondrial import receptor subunit TOM34 OS=Rattus norvegicus OX=10116 GN=Tomm34 PE=1 SV=1	Red	0.46146		-0.0426443
Pre-frontal cortex	O08662	Pi4ka	Phosphatidylinositol 4-kinase alpha OS=Rattus norvegicus OX=10116 GN=Pi4ka PE=1 SV=2	Red	0.46186		-0.0565835
Pre-frontal cortex	P30713	Gstt2	Glutathione S-transferase theta-2 OS=Rattus norvegicus OX=10116 GN=Gstt2 PE=1 SV=3	Red	0.46243		-0.0976108
Pre-frontal cortex	P62898	Cycs	Cytochrome c, somatic OS=Rattus norvegicus OX=10116 GN=Cycs PE=1 SV=2	Red	0.46278		0.0291463
Pre-frontal cortex	O35964	Sh3gl1	Endophilin-A2 OS=Rattus norvegicus OX=10116 GN=Sh3gl1 PE=1 SV=1	Red	0.4642		-0.0565835
Pre-frontal cortex	P07825	Syp	Synaptophysin OS=Rattus norvegicus OX=10116 GN=Syp PE=1 SV=1	Red	0.46421		0.0439433
Pre-frontal cortex	Q6MG60	Ddah2	N(G),N(G)-dimethylarginine dimethylaminohydrolase 2 OS=Rattus norvegicus OX=10116 GN=Ddah2 PE=1 SV=1	Red	0.4647		-0.0426443
Pre-frontal cortex	B0BN18	Pfdn2	Prefoldin subunit 2 OS=Rattus norvegicus OX=10116 GN=Pfdn2 PE=2 SV=1	Red	0.46512		-0.0285692
Pre-frontal cortex	P05765	Rps21	40S ribosomal protein S21 OS=Rattus norvegicus OX=10116 GN=Rps21 PE=1 SV=1	Red	0.46532		0.0291463
Pre-frontal cortex	Q2TL32	Ubr4	E3 ubiquitin-protein ligase UBR4 OS=Rattus norvegicus OX=10116 GN=Ubr4 PE=1 SV=2	Red	0.46571		-0.0976108
Pre-frontal cortex	P05708	Hk1	Hexokinase-1 OS=Rattus norvegicus OX=10116 GN=Hk1 PE=1 SV=4	Red	0.46622		-0.0143553
Pre-frontal cortex	P14604	Echs1	Enoyl-CoA hydratase, mitochondrial OS=Rattus norvegicus OX=10116 GN=Echs1 PE=1 SV=1	Red	0.46685		-0.0143553
Pre-frontal cortex	P60905	Dnajc5	DnaJ homolog subfamily C member 5 OS=Rattus norvegicus OX=10116 GN=Dnajc5 PE=1 SV=1	Red	0.46696		0.0439433
Pre-frontal cortex	O70196	Prep	Prolyl endopeptidase OS=Rattus norvegicus OX=10116 GN=Prep PE=1 SV=1	Red	0.4674		0.0439433
Pre-frontal cortex	Q5I6B8	Pip5k1c	Phosphatidylinositol 4-phosphate 5-kinase type-1 gamma OS=Rattus norvegicus OX=10116 GN=Pip5k1c PE=1 SV=1	Red	0.46952		0.0291463
Pre-frontal cortex	P00388	Por	NADPH--cytochrome P450 reductase OS=Rattus norvegicus OX=10116 GN=Por PE=1 SV=3	Red	0.46964		0.0892673
Pre-frontal cortex	Q9Z2G8	Nap1l1	Nucleosome assembly protein 1-like 1 OS=Rattus norvegicus OX=10116 GN=Nap1l1 PE=1 SV=1	Red	0.46967		0.0144996
Pre-frontal cortex	Q4KM74	Sec22b	Vesicle-trafficking protein SEC22b OS=Rattus norvegicus OX=10116 GN=Sec22b PE=1 SV=3	Red	0.46978		0.0439433
Pre-frontal cortex	Q6AXX6	Prxl2a	Peroxiredoxin-like 2A OS=Rattus norvegicus OX=10116 GN=Prxl2a PE=1 SV=1	Red	0.47007		-0.0426443
Pre-frontal cortex	Q62745	Cd81	CD81 antigen OS=Rattus norvegicus OX=10116 GN=Cd81 PE=1 SV=1	Red	0.4702		-0.0426443
Pre-frontal cortex	P09034	Ass1	Argininosuccinate synthase OS=Rattus norvegicus OX=10116 GN=Ass1 PE=1 SV=1	Red	0.47039		-0.0285692
Pre-frontal cortex	Q6AY84	Scrn1	Secernin-1 OS=Rattus norvegicus OX=10116 GN=Scrn1 PE=1 SV=1	Red	0.47049		-0.0143553
Pre-frontal cortex	P13086	Suclg1	Succinate--CoA ligase [ADP/GDP-forming] subunit alpha, mitochondrial OS=Rattus norvegicus OX=10116 GN=Suclg1 PE=2 SV=2	Red	0.47053		0.0144996
Pre-frontal cortex	O35509	Rab11b	Ras-related protein Rab-11B OS=Rattus norvegicus OX=10116 GN=Rab11b PE=1 SV=4	Red	0.47059		-0.0285692
Pre-frontal cortex	Q05175	Basp1	Brain acid soluble protein 1 OS=Rattus norvegicus OX=10116 GN=Basp1 PE=1 SV=2	Red	0.47071		0.0291463
Pre-frontal cortex	P31662	Slc6a17	Sodium-dependent neutral amino acid transporter SLC6A17 OS=Rattus norvegicus OX=10116 GN=Slc6a17 PE=1 SV=1	Red	0.47137		0.0439433
Pre-frontal cortex	P41565	Idh3g	Isocitrate dehydrogenase [NAD] subunit gamma 1, mitochondrial OS=Rattus norvegicus OX=10116 GN=Idh3g PE=1 SV=2	Red	0.47263		-0.0143553
Pre-frontal cortex	Q63198	Cntn1	Contactin-1 OS=Rattus norvegicus OX=10116 GN=Cntn1 PE=1 SV=2	Red	0.47345		-0.0285692
Pre-frontal cortex	Q63270	Aco1	Cytoplasmic aconitate hydratase OS=Rattus norvegicus OX=10116 GN=Aco1 PE=1 SV=1	Red	0.47401		0.0144996
Pre-frontal cortex	P62853	Rps25	40S ribosomal protein S25 OS=Rattus norvegicus OX=10116 GN=Rps25 PE=2 SV=1	Red	0.4745		-0.0285692
Pre-frontal cortex	Q5BJP3	Ufm1	Ubiquitin-fold modifier 1 OS=Rattus norvegicus OX=10116 GN=Ufm1 PE=3 SV=1	Red	0.47521		0.0144996
Pre-frontal cortex	Q6AXU6	JPT1	Jupiter microtubule associated homolog 1 OS=Rattus norvegicus OX=10116 GN=JPT1 PE=1 SV=3	Red	0.47529		0.0291463
Pre-frontal cortex	Q64536	Pdk2	[Pyruvate dehydrogenase (acetyl-transferring)] kinase isozyme 2, mitochondrial OS=Rattus norvegicus OX=10116 GN=Pdk2 PE=1 SV=1	Red	0.47536		0.0144996
Pre-frontal cortex	P97615	Txn2	Thioredoxin, mitochondrial OS=Rattus norvegicus OX=10116 GN=Txn2 PE=2 SV=1	Red	0.47578		-0.0143553
Pre-frontal cortex	Q7TP52	Cmbl	Carboxymethylenebutenolidase homolog OS=Rattus norvegicus OX=10116 GN=Cmbl PE=2 SV=1	Red	0.47684		-0.0285692
Pre-frontal cortex	D3ZQL7	Tppp	Tubulin polymerization-promoting protein OS=Rattus norvegicus OX=10116 GN=Tppp PE=1 SV=1	Red	0.47737		0.0144996
Pre-frontal cortex	P49621	Dgkb	Diacylglycerol kinase beta OS=Rattus norvegicus OX=10116 GN=Dgkb PE=1 SV=1	Red	0.47826		-0.0703893
Pre-frontal cortex	Q5XIF6	Tuba4a	Tubulin alpha-4A chain OS=Rattus norvegicus OX=10116 GN=Tuba4a PE=1 SV=1	Red	0.48043		0.0144996
Pre-frontal cortex	P68182	Prkacb	cAMP-dependent protein kinase catalytic subunit beta OS=Rattus norvegicus OX=10116 GN=Prkacb PE=1 SV=2	Red	0.48127		0.0144996
Pre-frontal cortex	P70619	Gsr	Glutathione reductase (Fragment) OS=Rattus norvegicus OX=10116 GN=Gsr PE=2 SV=2	Red	0.48276		-0.0143553
Pre-frontal cortex	Q9Z0J8	Negr1	Neuronal growth regulator 1 OS=Rattus norvegicus OX=10116 GN=Negr1 PE=1 SV=1	Red	0.48317		-0.0565835
Pre-frontal cortex	P62260	Ywhae	14-3-3 protein epsilon OS=Rattus norvegicus OX=10116 GN=Ywhae PE=1 SV=1	Red	0.48415		0
Pre-frontal cortex	P49803	Rgs7	Regulator of G-protein signaling 7 OS=Rattus norvegicus OX=10116 GN=Rgs7 PE=1 SV=2	Red	0.48419		-0.0143553
Pre-frontal cortex	P11250	Rpl34	60S ribosomal protein L34 OS=Rattus norvegicus OX=10116 GN=Rpl34 PE=1 SV=3	Red	0.48434		0.0144996
Pre-frontal cortex	P16884	Nefh	Neurofilament heavy polypeptide OS=Rattus norvegicus OX=10116 GN=Nefh PE=1 SV=4	Red	0.48441		0.0291463
Pre-frontal cortex	Q62876	Syngr1	Synaptogyrin-1 OS=Rattus norvegicus OX=10116 GN=Syngr1 PE=1 SV=1	Red	0.48494		0.0144996
Pre-frontal cortex	P62856	Rps26	40S ribosomal protein S26 OS=Rattus norvegicus OX=10116 GN=Rps26 PE=3 SV=3	Red	0.48594		-0.0143553
Pre-frontal cortex	P38652	Pgm1	Phosphoglucomutase-1 OS=Rattus norvegicus OX=10116 GN=Pgm1 PE=1 SV=2	Red	0.48616		0
Pre-frontal cortex	Q641Z2	Ptpn9	Tyrosine-protein phosphatase non-receptor type 9 OS=Rattus norvegicus OX=10116 GN=Ptpn9 PE=2 SV=1	Red	0.48618		0.0144996
Pre-frontal cortex	P63004	Pafah1b1	Platelet-activating factor acetylhydrolase IB subunit alpha OS=Rattus norvegicus OX=10116 GN=Pafah1b1 PE=1 SV=2	Red	0.48657		0
Pre-frontal cortex	Q704S8	Crat	Carnitine O-acetyltransferase OS=Rattus norvegicus OX=10116 GN=Crat PE=1 SV=1	Red	0.48718		0.0291463
Pre-frontal cortex	Q6AYS7	Acy1a	Aminoacylase-1A OS=Rattus norvegicus OX=10116 GN=Acy1a PE=1 SV=1	Red	0.48755		0.0144996
Pre-frontal cortex	P04797	Gapdh	Glyceraldehyde-3-phosphate dehydrogenase OS=Rattus norvegicus OX=10116 GN=Gapdh PE=1 SV=3	Red	0.4882		0
Pre-frontal cortex	P97526	Nf1	Neurofibromin OS=Rattus norvegicus OX=10116 GN=Nf1 PE=1 SV=1	Red	0.4889		-0.0143553
Pre-frontal cortex	P04762	Cat	Catalase OS=Rattus norvegicus OX=10116 GN=Cat PE=1 SV=3	Red	0.48895		-0.0143553
Pre-frontal cortex	P24155	Thop1	Thimet oligopeptidase OS=Rattus norvegicus OX=10116 GN=Thop1 PE=1 SV=4	Red	0.49036		-0.0143553
Pre-frontal cortex	Q64548-2	Rtn1	Isoform RTN1-S of Reticulon-1 OS=Rattus norvegicus OX=10116 GN=Rtn1	Red	0.49058		0.0144996
Pre-frontal cortex	Q6AZ50	Atg3	Ubiquitin-like-conjugating enzyme ATG3 OS=Rattus norvegicus OX=10116 GN=Atg3 PE=2 SV=1	Red	0.49132		0.0144996
Pre-frontal cortex	P62832	Rpl23	60S ribosomal protein L23 OS=Rattus norvegicus OX=10116 GN=Rpl23 PE=2 SV=1	Red	0.49145		-0.0143553
Pre-frontal cortex	Q62812	Myh9	Myosin-9 OS=Rattus norvegicus OX=10116 GN=Myh9 PE=1 SV=3	Red	0.49211		-0.0285692
Pre-frontal cortex	Q68FX1	Mpi	Mannose-6-phosphate isomerase OS=Rattus norvegicus OX=10116 GN=Mpi PE=2 SV=1	Red	0.49259		-0.0143553
Pre-frontal cortex	P17078	Rpl35	60S ribosomal protein L35 OS=Rattus norvegicus OX=10116 GN=Rpl35 PE=1 SV=3	Red	0.4934		0
Pre-frontal cortex	P97834	Gps1	COP9 signalosome complex subunit 1 OS=Rattus norvegicus OX=10116 GN=Gps1 PE=1 SV=1	Red	0.49357		0
Pre-frontal cortex	P48679	Lmna	Prelamin-A/C OS=Rattus norvegicus OX=10116 GN=Lmna PE=1 SV=1	Red	0.49397		-0.0143553
Pre-frontal cortex	O88339	Epn1	Epsin-1 OS=Rattus norvegicus OX=10116 GN=Epn1 PE=1 SV=1	Red	0.49456		0
Pre-frontal cortex	Q9Z2F5	Ctbp1	C-terminal-binding protein 1 OS=Rattus norvegicus OX=10116 GN=Ctbp1 PE=1 SV=3	Red	0.49511		0
Pre-frontal cortex	Q5MJ12	Fbxl16	F-box/LRR-repeat protein 16 OS=Rattus norvegicus OX=10116 GN=Fbxl16 PE=2 SV=1	Red	0.49561		0
Pre-frontal cortex	P23965	Eci1	Enoyl-CoA delta isomerase 1, mitochondrial OS=Rattus norvegicus OX=10116 GN=Eci1 PE=1 SV=1	Red	0.49573		0.0144996
Pre-frontal cortex	P62870	Elob	Elongin-B OS=Rattus norvegicus OX=10116 GN=Elob PE=1 SV=1	Red	0.49622		0
Pre-frontal cortex	P21533	Rpl6	60S ribosomal protein L6 OS=Rattus norvegicus OX=10116 GN=Rpl6 PE=1 SV=5	Red	0.49661		0
Pre-frontal cortex	P35704	Prdx2	Peroxiredoxin-2 OS=Rattus norvegicus OX=10116 GN=Prdx2 PE=1 SV=3	Red	0.49671		0
Pre-frontal cortex	Q9JLT0	Myh10	Myosin-10 OS=Rattus norvegicus OX=10116 GN=Myh10 PE=1 SV=1	Red	0.4972		0
Pre-frontal cortex	Q9Z244	Gmpr	GMP reductase 1 OS=Rattus norvegicus OX=10116 GN=Gmpr PE=2 SV=1	Red	0.49857		0
Pre-frontal cortex	P13264	Gls	Glutaminase kidney isoform, mitochondrial OS=Rattus norvegicus OX=10116 GN=Gls PE=1 SV=2	Red	0.49883		0
Pre-frontal cortex	P07936	Gap43	Neuromodulin OS=Rattus norvegicus OX=10116 GN=Gap43 PE=1 SV=1	Red	0.49884		0
Pre-frontal cortex	P70580	Pgrmc1	Membrane-associated progesterone receptor component 1 OS=Rattus norvegicus OX=10116 GN=Pgrmc1 PE=1 SV=3	Red	0.49927		0
Pre-frontal cortex	Q71UF4	Rbbp7	Histone-binding protein RBBP7 OS=Rattus norvegicus OX=10116 GN=Rbbp7 PE=2 SV=1	Red	0.4998		0
Hippocampus	P31000	Vim	Vimentin OS=Rattus norvegicus OX=10116 GN=Vim PE=1 SV=2	Blue	0.00266	Up	3.18442
Hippocampus	Q9Z2L0	Vdac1	Voltage-dependent anion-selective channel protein 1 OS=Rattus norvegicus OX=10116 GN=Vdac1 PE=1 SV=4	Blue	0.00367	Up	2.73697
Hippocampus	P97700	Slc25a11	Mitochondrial 2-oxoglutarate/malate carrier protein OS=Rattus norvegicus OX=10116 GN=Slc25a11 PE=1 SV=3	Blue	0.03536	Up	2.55639
Hippocampus	Q06647	Atp5po	ATP synthase subunit O, mitochondrial OS=Rattus norvegicus OX=10116 GN=Atp5po PE=1 SV=1	Blue	0.00478	Up	2.47393
Hippocampus	Q05962	Slc25a4	ADP/ATP translocase 1 OS=Rattus norvegicus OX=10116 GN=Slc25a4 PE=1 SV=3	Blue	0.01	Up	2.47393
Hippocampus	P16036	Slc25a3	Phosphate carrier protein, mitochondrial OS=Rattus norvegicus OX=10116 GN=Slc25a3 PE=1 SV=1	Blue	0.0148	Up	2.47393
Hippocampus	P21571	Atp5pf	ATP synthase-coupling factor 6, mitochondrial OS=Rattus norvegicus OX=10116 GN=Atp5pf PE=1 SV=1	Blue	0.03728	Up	2.05889
Hippocampus	P35435	Atp5f1c	ATP synthase subunit gamma, mitochondrial OS=Rattus norvegicus OX=10116 GN=Atp5f1c PE=1 SV=2	Blue	0.00475	Up	1.88897
Hippocampus	Q68FY0	Uqcrc1	Cytochrome b-c1 complex subunit 1, mitochondrial OS=Rattus norvegicus OX=10116 GN=Uqcrc1 PE=1 SV=1	Blue	0.02696	Up	1.88897
Hippocampus	O35764	Nptxr	Neuronal pentraxin receptor OS=Rattus norvegicus OX=10116 GN=Nptxr PE=1 SV=1	Blue	0.04788	Up	1.88897
Hippocampus	P19511	Atp5pb	ATP synthase F(0) complex subunit B1, mitochondrial OS=Rattus norvegicus OX=10116 GN=Atp5pb PE=1 SV=1	Blue	0.00565	Up	1.78588
Hippocampus	D4A631	Arfgef1	Brefeldin A-inhibited guanine nucleotide-exchange protein 1 OS=Rattus norvegicus OX=10116 GN=Arfgef1 PE=1 SV=1	Orange	0.00102		-2.32769
Hippocampus	P62804	H4c2	Histone H4 OS=Rattus norvegicus OX=10116 GN=H4c2 PE=1 SV=2	Blue	0.00587	Up	1.68966
Hippocampus	P35434	Atp5f1d	ATP synthase subunit delta, mitochondrial OS=Rattus norvegicus OX=10116 GN=Atp5f1d PE=1 SV=2	Blue	0.0061	Up	1.68966
Hippocampus	Q9JJK1	Gpm6b	Neuronal membrane glycoprotein M6-b OS=Rattus norvegicus OX=10116 GN=Gpm6b PE=1 SV=1	Blue	0.03512	Up	1.51457
Hippocampus	Q920Q0	Palm	Paralemmin-1 OS=Rattus norvegicus OX=10116 GN=Palm PE=1 SV=1	Blue	0.00129	Up	1.47393
Hippocampus	Q5PPH0	Enoph1	Enolase-phosphatase E1 OS=Rattus norvegicus OX=10116 GN=Enoph1 PE=2 SV=1	Orange	0.00124		-1.28688
Hippocampus	Q3B8Q2	Eif4a3	Eukaryotic initiation factor 4A-III OS=Rattus norvegicus OX=10116 GN=Eif4a3 PE=1 SV=1	Orange	0.00127		-3.44626
Hippocampus	P13638	Atp1b2	Sodium/potassium-transporting ATPase subunit beta-2 OS=Rattus norvegicus OX=10116 GN=Atp1b2 PE=1 SV=1	Blue	0.00633	Up	1.47393
Hippocampus	P05371	Clu	Clusterin OS=Rattus norvegicus OX=10116 GN=Clu PE=1 SV=2	Orange	0.00142		1.68966
Hippocampus	B0BNF1	Septin8	Septin-8 OS=Rattus norvegicus OX=10116 GN=Septin8 PE=1 SV=1	Blue	0.00864	Up	1.47393
Hippocampus	P49803	Rgs7	Regulator of G-protein signaling 7 OS=Rattus norvegicus OX=10116 GN=Rgs7 PE=1 SV=2	Blue	0.00474	Up	1.4344
Hippocampus	Q01062	Pde2a	cGMP-dependent 3',5'-cyclic phosphodiesterase OS=Rattus norvegicus OX=10116 GN=Pde2a PE=1 SV=2	Blue	0.00061	Up	1.39593
Hippocampus	P45592	Cfl1	Cofilin-1 OS=Rattus norvegicus OX=10116 GN=Cfl1 PE=1 SV=3	Red	0.00186		-0.226509
Hippocampus	Q00715	Histone H2B type 1 OS=Rattus norvegicus OX=10116	Histone H2B type 1 OS=Rattus norvegicus OX=10116 PE=1 SV=2	Blue	0.0012	Up	1.35845
Hippocampus	P10824	Gnai1	Guanine nucleotide-binding protein G(i) subunit alpha-1 OS=Rattus norvegicus OX=10116 GN=Gnai1 PE=1 SV=3	Blue	0.0002	Up	1.2863
Hippocampus	P14668	Anxa5	Annexin A5 OS=Rattus norvegicus OX=10116 GN=Anxa5 PE=1 SV=3	Blue	0.03374	Up	1.2863
Hippocampus	P07340	Atp1b1	Sodium/potassium-transporting ATPase subunit beta-1 OS=Rattus norvegicus OX=10116 GN=Atp1b1 PE=1 SV=1	Blue	0.00264	Up	1.21759
Hippocampus	P06686	Atp1a2	Sodium/potassium-transporting ATPase subunit alpha-2 OS=Rattus norvegicus OX=10116 GN=Atp1a2 PE=1 SV=1	Blue	0.00496	Up	1.18442
Hippocampus	P15999	Atp5f1a	ATP synthase subunit alpha, mitochondrial OS=Rattus norvegicus OX=10116 GN=Atp5f1a PE=1 SV=2	Blue	0.00698	Up	1.152
Hippocampus	P04897	Gnai2	Guanine nucleotide-binding protein G(i) subunit alpha-2 OS=Rattus norvegicus OX=10116 GN=Gnai2 PE=1 SV=3	Orange	0.00339		1.59946
Hippocampus	P06687	Atp1a3	Sodium/potassium-transporting ATPase subunit alpha-3 OS=Rattus norvegicus OX=10116 GN=Atp1a3 PE=1 SV=2	Blue	0.00768	Up	1.12029
Hippocampus	Q64119	Myl6	Myosin light polypeptide 6 OS=Rattus norvegicus OX=10116 GN=Myl6 PE=1 SV=3	Blue	0.01763	Up	1.12029
Hippocampus	P60203	Plp1	Myelin proteolipid protein OS=Rattus norvegicus OX=10116 GN=Plp1 PE=1 SV=2	Blue	0.00211	Up	1.08927
Hippocampus	B0BND0	Enpp6	Glycerophosphocholine cholinephosphodiesterase ENPP6 OS=Rattus norvegicus OX=10116 GN=Enpp6 PE=1 SV=1	Blue	0.03791	Up	1.08927
Hippocampus	P97710	Sirpa	Tyrosine-protein phosphatase non-receptor type substrate 1 OS=Rattus norvegicus OX=10116 GN=Sirpa PE=1 SV=1	Blue	0.0118	Up	1.05889
Hippocampus	P35745	Acyp2	Acylphosphatase-2 OS=Rattus norvegicus OX=10116 GN=Acyp2 PE=1 SV=2	Orange	0.0047		-0.731183
Hippocampus	P32851	Stx1a	Syntaxin-1A OS=Rattus norvegicus OX=10116 GN=Stx1a PE=1 SV=1	Blue	0.02419	Up	1.05889
Hippocampus	P06685	Atp1a1	Sodium/potassium-transporting ATPase subunit alpha-1 OS=Rattus norvegicus OX=10116 GN=Atp1a1 PE=1 SV=1	Blue	0.02125	Up	1.02915
Hippocampus	P31662	Slc6a17	Sodium-dependent neutral amino acid transporter SLC6A17 OS=Rattus norvegicus OX=10116 GN=Slc6a17 PE=1 SV=1	Blue	0.04607	Up	1.02915
Hippocampus	O88377	Pip4k2b	Phosphatidylinositol 5-phosphate 4-kinase type-2 beta OS=Rattus norvegicus OX=10116 GN=Pip4k2b PE=1 SV=1	Orange	0.00494		-0.85599
Hippocampus	P10719	Atp5f1b	ATP synthase subunit beta, mitochondrial OS=Rattus norvegicus OX=10116 GN=Atp5f1b PE=1 SV=2	Blue	0.00359	Up	0.971431
Hippocampus	O88778	Bsn	Protein bassoon OS=Rattus norvegicus OX=10116 GN=Bsn PE=1 SV=3	Blue	0.04256	Up	0.915936
Hippocampus	Q5EGY4	Ykt6	Synaptobrevin homolog YKT6 OS=Rattus norvegicus OX=10116 GN=Ykt6 PE=1 SV=1	Blue	0.00314	Up	0.888969
Hippocampus	P02650	Apoe	Apolipoprotein E OS=Rattus norvegicus OX=10116 GN=Apoe PE=1 SV=2	Blue	0.00147	Up	0.862496
Hippocampus	Q05175	Basp1	Brain acid soluble protein 1 OS=Rattus norvegicus OX=10116 GN=Basp1 PE=1 SV=2	Blue	0.00804	Up	0.862496
Hippocampus	P50137	Tkt	Transketolase OS=Rattus norvegicus OX=10116 GN=Tkt PE=1 SV=1	Red	0.00585		-0.275007
Hippocampus	P62138	Ppp1ca	Serine/threonine-protein phosphatase PP1-alpha catalytic subunit OS=Rattus norvegicus OX=10116 GN=Ppp1ca PE=1 SV=1	Blue	0.00978	Up	0.862496
Hippocampus	P61227	Rap2b	Ras-related protein Rap-2b OS=Rattus norvegicus OX=10116 GN=Rap2b PE=2 SV=1	Blue	0.04799	Up	0.862496
Hippocampus	P47942	Dpysl2	Dihydropyrimidinase-related protein 2 OS=Rattus norvegicus OX=10116 GN=Dpysl2 PE=1 SV=1	Red	0.00614		-0.263034
Hippocampus	P30713	Gstt2	Glutathione S-transferase theta-2 OS=Rattus norvegicus OX=10116 GN=Gstt2 PE=1 SV=3	Orange	0.00617		-1.36177
Hippocampus	Q9QWN8	Sptbn2	Spectrin beta chain, non-erythrocytic 2 OS=Rattus norvegicus OX=10116 GN=Sptbn2 PE=1 SV=2	Blue	0.00826	Up	0.836501
Hippocampus	P09527	Rab7a	Ras-related protein Rab-7a OS=Rattus norvegicus OX=10116 GN=Rab7a PE=1 SV=2	Blue	2e-05	Up	0.810966
Hippocampus	P13596	Ncam1	Neural cell adhesion molecule 1 OS=Rattus norvegicus OX=10116 GN=Ncam1 PE=1 SV=1	Blue	0.00524	Up	0.810966
Hippocampus	P23565	Ina	Alpha-internexin OS=Rattus norvegicus OX=10116 GN=Ina PE=1 SV=2	Blue	0.00858	Up	0.810966
Hippocampus	P01830	Thy1	Thy-1 membrane glycoprotein OS=Rattus norvegicus OX=10116 GN=Thy1 PE=1 SV=1	Blue	0.02217	Up	0.736966
Hippocampus	Q4V7C7	Actr3	Actin-related protein 3 OS=Rattus norvegicus OX=10116 GN=Actr3 PE=1 SV=1	Red	0.0074		-0.432959
Hippocampus	Q711G3	Iah1	Isoamyl acetate-hydrolyzing esterase 1 homolog OS=Rattus norvegicus OX=10116 GN=Iah1 PE=2 SV=2	Orange	0.00742		-0.641546
Hippocampus	P60123	Ruvbl1	RuvB-like 1 OS=Rattus norvegicus OX=10116 GN=Ruvbl1 PE=1 SV=1	Orange	0.00759		1.02915
Hippocampus	Q5M7U6	Actr2	Actin-related protein 2 OS=Rattus norvegicus OX=10116 GN=Actr2 PE=2 SV=1	Red	0.00767		-0.286881
Hippocampus	P24268	Ctsd	Cathepsin D OS=Rattus norvegicus OX=10116 GN=Ctsd PE=1 SV=1	Blue	0.00057	Up	0.713119
Hippocampus	Q62745	Cd81	CD81 antigen OS=Rattus norvegicus OX=10116 GN=Cd81 PE=1 SV=1	Orange	0.00783		0.643856
Hippocampus	Q08602	Rabggta	Geranylgeranyl transferase type-2 subunit alpha OS=Rattus norvegicus OX=10116 GN=Rabggta PE=1 SV=1	Orange	0.00786		-0.83996
Hippocampus	P61265	Stx1b	Syntaxin-1B OS=Rattus norvegicus OX=10116 GN=Stx1b PE=1 SV=1	Blue	0.0016	Up	0.713119
Hippocampus	P54313	Gnb2	Guanine nucleotide-binding protein G(I)/G(S)/G(T) subunit beta-2 OS=Rattus norvegicus OX=10116 GN=Gnb2 PE=1 SV=4	Blue	0.02199	Up	0.68966
Hippocampus	P14841	Cst3	Cystatin-C OS=Rattus norvegicus OX=10116 GN=Cst3 PE=1 SV=2	Blue	0.00109	Up	0.621488
Hippocampus	P55067	Ncan	Neurocan core protein OS=Rattus norvegicus OX=10116 GN=Ncan PE=1 SV=1	Blue	0.00533	Up	0.599462
Hippocampus	Q9EQV6	Tpp1	Tripeptidyl-peptidase 1 OS=Rattus norvegicus OX=10116 GN=Tpp1 PE=1 SV=1	Orange	0.00858		1.12029
Hippocampus	Q05982	Nme1	Nucleoside diphosphate kinase A OS=Rattus norvegicus OX=10116 GN=Nme1 PE=1 SV=1	Blue	0.00701	Up	0.599462
Hippocampus	Q2PQA9	Kif5b	Kinesin-1 heavy chain OS=Rattus norvegicus OX=10116 GN=Kif5b PE=1 SV=1	Orange	0.00915		0.68966
Hippocampus	P62024	Phactr1	Phosphatase and actin regulator 1 OS=Rattus norvegicus OX=10116 GN=Phactr1 PE=1 SV=1	Orange	0.0094		-0.584963
Hippocampus	P15205	Map1b	Microtubule-associated protein 1B OS=Rattus norvegicus OX=10116 GN=Map1b PE=1 SV=3	Blue	0.00668	Up	0.514573
Hippocampus	P61107	Rab14	Ras-related protein Rab-14 OS=Rattus norvegicus OX=10116 GN=Rab14 PE=1 SV=3	Blue	0.0012	Up	0.494109
Hippocampus	P16086	Sptan1	Spectrin alpha chain, non-erythrocytic 1 OS=Rattus norvegicus OX=10116 GN=Sptan1 PE=1 SV=2	Blue	0.00101	Up	0.415037
Hippocampus	Q62950	Crmp1	Dihydropyrimidinase-related protein 1 OS=Rattus norvegicus OX=10116 GN=Crmp1 PE=1 SV=1	Red	0.01059		-0.238787
Hippocampus	P04905	Gstm1	Glutathione S-transferase Mu 1 OS=Rattus norvegicus OX=10116 GN=Gstm1 PE=1 SV=2	Red	0.01062		-0.464668
Hippocampus	Q5PPJ9	Sh3glb2	Endophilin-B2 OS=Rattus norvegicus OX=10116 GN=Sh3glb2 PE=1 SV=2	Red	0.01069		-0.263034
Hippocampus	P47868	Scg3	Secretogranin-3 OS=Rattus norvegicus OX=10116 GN=Scg3 PE=1 SV=1	Red	0.01089		0.454032
Hippocampus	Q5XI73	Arhgdia	Rho GDP-dissociation inhibitor 1 OS=Rattus norvegicus OX=10116 GN=Arhgdia PE=1 SV=1	Red	0.01113		-0.201634
Hippocampus	Q9JLJ3	Aldh9a1	4-trimethylaminobutyraldehyde dehydrogenase OS=Rattus norvegicus OX=10116 GN=Aldh9a1 PE=1 SV=1	Red	0.01113		-0.275007
Hippocampus	P36972	Aprt	Adenine phosphoribosyltransferase OS=Rattus norvegicus OX=10116 GN=Aprt PE=1 SV=1	Blue	0.00406	Up	0.415037
Hippocampus	O08875	Dclk1	Serine/threonine-protein kinase DCLK1 OS=Rattus norvegicus OX=10116 GN=Dclk1 PE=1 SV=1	Blue	0.00099	Up	0.340075
Hippocampus	P19234	Ndufv2	NADH dehydrogenase [ubiquinone] flavoprotein 2, mitochondrial OS=Rattus norvegicus OX=10116 GN=Ndufv2 PE=1 SV=2	Orange	0.01201		2.25154
Hippocampus	Q3B7U9	Fkbp8	Peptidyl-prolyl cis-trans isomerase FKBP8 OS=Rattus norvegicus OX=10116 GN=Fkbp8 PE=2 SV=1	Orange	0.01254		1.02915
Hippocampus	Q5FVI4	Cend1	Cell cycle exit and neuronal differentiation protein 1 OS=Rattus norvegicus OX=10116 GN=Cend1 PE=1 SV=1	Orange	0.01266		2.05889
Hippocampus	Q6PEC1	Tbca	Tubulin-specific chaperone A OS=Rattus norvegicus OX=10116 GN=Tbca PE=1 SV=1	Orange	0.01294		-0.925999
Hippocampus	P85515	Actr1a	Alpha-centractin OS=Rattus norvegicus OX=10116 GN=Actr1a PE=1 SV=1	Red	0.01419		-0.214125
Hippocampus	Q6AXU6	JPT1	Jupiter microtubule associated homolog 1 OS=Rattus norvegicus OX=10116 GN=JPT1 PE=1 SV=3	Red	0.01465		-0.555816
Hippocampus	P04639	Apoa1	Apolipoprotein A-I OS=Rattus norvegicus OX=10116 GN=Apoa1 PE=1 SV=2	Orange	0.0147		1.32193
Hippocampus	P53534	Pygb	Glycogen phosphorylase, brain form (Fragment) OS=Rattus norvegicus OX=10116 GN=Pygb PE=1 SV=3	Blue	0.00294	Down	-0.443607
Hippocampus	P31977	Ezr	Ezrin OS=Rattus norvegicus OX=10116 GN=Ezr PE=1 SV=3	Orange	0.01498		1.02915
Hippocampus	P63174	Rpl38	60S ribosomal protein L38 OS=Rattus norvegicus OX=10116 GN=Rpl38 PE=1 SV=2	Orange	0.01508		0.810966
Hippocampus	Q3T1K5	Capza2	F-actin-capping protein subunit alpha-2 OS=Rattus norvegicus OX=10116 GN=Capza2 PE=1 SV=1	Red	0.0152		-0.344828
Hippocampus	G3V7P1	Stx12	Syntaxin-12 OS=Rattus norvegicus OX=10116 GN=Stx12 PE=1 SV=1	Orange	0.01604		1.39593
Hippocampus	P63322	Rala	Ras-related protein Ral-A OS=Rattus norvegicus OX=10116 GN=Rala PE=1 SV=1	Red	0.01674		0.556393
Hippocampus	P01041	Cstb	Cystatin-B OS=Rattus norvegicus OX=10116 GN=Cstb PE=1 SV=1	Red	0.01735		-0.400538
Hippocampus	Q63198	Cntn1	Contactin-1 OS=Rattus norvegicus OX=10116 GN=Cntn1 PE=1 SV=2	Red	0.01744		0.514573
Hippocampus	Q5XIF6	Tuba4a	Tubulin alpha-4A chain OS=Rattus norvegicus OX=10116 GN=Tuba4a PE=1 SV=1	Blue	0.00301	Down	-0.464668
Hippocampus	P38652	Pgm1	Phosphoglucomutase-1 OS=Rattus norvegicus OX=10116 GN=Pgm1 PE=1 SV=2	Blue	0.0045	Down	-0.485427
Hippocampus	P61983	Ywhag	14-3-3 protein gamma OS=Rattus norvegicus OX=10116 GN=Ywhag PE=1 SV=2	Red	0.01782		-0.275007
Hippocampus	P30349	Lta4h	Leukotriene A-4 hydrolase OS=Rattus norvegicus OX=10116 GN=Lta4h PE=1 SV=3	Red	0.01835		-0.475085
Hippocampus	P25809	Ckmt1	Creatine kinase U-type, mitochondrial OS=Rattus norvegicus OX=10116 GN=Ckmt1 PE=1 SV=1	Blue	0.0065	Down	-0.485427
Hippocampus	P29147	Bdh1	D-beta-hydroxybutyrate dehydrogenase, mitochondrial OS=Rattus norvegicus OX=10116 GN=Bdh1 PE=1 SV=2	Orange	0.01875		1.25154
Hippocampus	O88588	Pacs1	Phosphofurin acidic cluster sorting protein 1 OS=Rattus norvegicus OX=10116 GN=Pacs1 PE=1 SV=1	Orange	0.01944		1.51457
Hippocampus	P49621	Dgkb	Diacylglycerol kinase beta OS=Rattus norvegicus OX=10116 GN=Dgkb PE=1 SV=1	Orange	0.01948		-1.17632
Hippocampus	Q6RUV5	Rac1	Ras-related C3 botulinum toxin substrate 1 OS=Rattus norvegicus OX=10116 GN=Rac1 PE=1 SV=1	Red	0.02002		0.556393
Hippocampus	P07633	Pccb	Propionyl-CoA carboxylase beta chain, mitochondrial OS=Rattus norvegicus OX=10116 GN=Pccb PE=2 SV=1	Orange	0.02011		-0.85599
Hippocampus	P31016	Dlg4	Disks large homolog 4 OS=Rattus norvegicus OX=10116 GN=Dlg4 PE=1 SV=1	Orange	0.02065		0.943416
Hippocampus	P05712	Rab2a	Ras-related protein Rab-2A OS=Rattus norvegicus OX=10116 GN=Rab2a PE=2 SV=1	Red	0.02068		0.37707
Hippocampus	D3ZW55	Itpa	Inosine triphosphate pyrophosphatase OS=Rattus norvegicus OX=10116 GN=Itpa PE=3 SV=1	Blue	0.00942	Down	-0.505891
Hippocampus	Q9QVC8	Fkbp4	Peptidyl-prolyl cis-trans isomerase FKBP4 OS=Rattus norvegicus OX=10116 GN=Fkbp4 PE=1 SV=3	Red	0.02125		0.514573
Hippocampus	Q6AY84	Scrn1	Secernin-1 OS=Rattus norvegicus OX=10116 GN=Scrn1 PE=1 SV=1	Red	0.02163		-0.378512
Hippocampus	P62268	Rps23	40S ribosomal protein S23 OS=Rattus norvegicus OX=10116 GN=Rps23 PE=1 SV=3	Orange	0.02187		0.810966
Hippocampus	P84087	Cplx2	Complexin-2 OS=Rattus norvegicus OX=10116 GN=Cplx2 PE=1 SV=1	Blue	0.00795	Down	-0.526069
Hippocampus	P07895	Sod2	Superoxide dismutase [Mn], mitochondrial OS=Rattus norvegicus OX=10116 GN=Sod2 PE=1 SV=2	Blue	0.00099	Down	-0.536053
Hippocampus	Q9JMB5	Adrm1	Proteasomal ubiquitin receptor ADRM1 OS=Rattus norvegicus OX=10116 GN=Adrm1 PE=1 SV=2	Orange	0.02272		-1.15704
Hippocampus	B0BNE5	Esd	S-formylglutathione hydrolase OS=Rattus norvegicus OX=10116 GN=Esd PE=2 SV=1	Red	0.02416		-0.333424
Hippocampus	P85970	Arpc2	Actin-related protein 2/3 complex subunit 2 OS=Rattus norvegicus OX=10116 GN=Arpc2 PE=1 SV=1	Blue	0.00421	Down	-0.555816
Hippocampus	Q5XHY5	Tars1	Threonine--tRNA ligase 1, cytoplasmic OS=Rattus norvegicus OX=10116 GN=Tars1 PE=1 SV=1	Orange	0.02488		0.836501
Hippocampus	O88370	Pip4k2c	Phosphatidylinositol 5-phosphate 4-kinase type-2 gamma OS=Rattus norvegicus OX=10116 GN=Pip4k2c PE=1 SV=1	Orange	0.0251		-1.60407
Hippocampus	P27139	Ca2	Carbonic anhydrase 2 OS=Rattus norvegicus OX=10116 GN=Ca2 PE=1 SV=2	Blue	0.00116	Down	-0.565597
Hippocampus	Q62658	Fkbp1a	Peptidyl-prolyl cis-trans isomerase FKBP1A OS=Rattus norvegicus OX=10116 GN=Fkbp1a PE=1 SV=3	Red	0.02607		-0.275007
Hippocampus	P70550	Rab8b	Ras-related protein Rab-8B OS=Rattus norvegicus OX=10116 GN=Rab8b PE=1 SV=1	Red	0.02614		0.535332
Hippocampus	P14046	A1i3	Alpha-1-inhibitor 3 OS=Rattus norvegicus OX=10116 GN=A1i3 PE=1 SV=1	Orange	0.02625		-1.18269
Hippocampus	F1LNJ2	Snrnp200	U5 small nuclear ribonucleoprotein 200 kDa helicase OS=Rattus norvegicus OX=10116 GN=Snrnp200 PE=1 SV=1	Orange	0.02626		1
Hippocampus	Q5HZE4	Mri1	Methylthioribose-1-phosphate isomerase OS=Rattus norvegicus OX=10116 GN=Mri1 PE=1 SV=1	Orange	0.02679		-1.94111
Hippocampus	Q3B8Q0	Mapre2	Microtubule-associated protein RP/EB family member 2 OS=Rattus norvegicus OX=10116 GN=Mapre2 PE=1 SV=1	Blue	0.00526	Down	-0.604071
Hippocampus	Q62812	Myh9	Myosin-9 OS=Rattus norvegicus OX=10116 GN=Myh9 PE=1 SV=3	Orange	0.02705		3.18442
Hippocampus	Q64640	Adk	Adenosine kinase OS=Rattus norvegicus OX=10116 GN=Adk PE=1 SV=3	Blue	0.01137	Down	-0.604071
Hippocampus	Q5XIT1	Mapre3	Microtubule-associated protein RP/EB family member 3 OS=Rattus norvegicus OX=10116 GN=Mapre3 PE=1 SV=1	Red	0.02753		-0.31034
Hippocampus	Q63092	Camkv	CaM kinase-like vesicle-associated protein OS=Rattus norvegicus OX=10116 GN=Camkv PE=1 SV=1	Red	0.02766		-0.31034
Hippocampus	B2GUZ5	Capza1	F-actin-capping protein subunit alpha-1 OS=Rattus norvegicus OX=10116 GN=Capza1 PE=1 SV=1	Orange	0.02788		0.713119
Hippocampus	Q62688	Plcl1	Inactive phospholipase C-like protein 1 OS=Rattus norvegicus OX=10116 GN=Plcl1 PE=1 SV=1	Orange	0.02821		1.152
Hippocampus	P0C2X9	Aldh4a1	Delta-1-pyrroline-5-carboxylate dehydrogenase, mitochondrial OS=Rattus norvegicus OX=10116 GN=Aldh4a1 PE=1 SV=1	Orange	0.02822		1.78588
Hippocampus	P97697	Impa1	Inositol monophosphatase 1 OS=Rattus norvegicus OX=10116 GN=Impa1 PE=1 SV=2	Red	0.02839		-0.263034
Hippocampus	Q5U2N3	Pitpnm1	Membrane-associated phosphatidylinositol transfer protein 1 OS=Rattus norvegicus OX=10116 GN=Pitpnm1 PE=1 SV=1	Orange	0.0286		1.73697
Hippocampus	Q7TMB7	Plppr4	Phospholipid phosphatase-related protein type 4 OS=Rattus norvegicus OX=10116 GN=Plppr4 PE=1 SV=1	Orange	0.02869		1.35845
Hippocampus	P35465	Pak1	Serine/threonine-protein kinase PAK 1 OS=Rattus norvegicus OX=10116 GN=Pak1 PE=1 SV=3	Red	0.02903		-0.526069
Hippocampus	Q8VHK2	Caskin1	Caskin-1 OS=Rattus norvegicus OX=10116 GN=Caskin1 PE=1 SV=1	Orange	0.02948		2.73697
Hippocampus	O88767	Park7	Parkinson disease protein 7 homolog OS=Rattus norvegicus OX=10116 GN=Park7 PE=1 SV=1	Red	0.0298		-0.389567
Hippocampus	A2RUW1	Tollip	Toll-interacting protein OS=Rattus norvegicus OX=10116 GN=Tollip PE=1 SV=1	Red	0.03011		0.514573
Hippocampus	Q793F9	Vps4a	Vacuolar protein sorting-associated protein 4A OS=Rattus norvegicus OX=10116 GN=Vps4a PE=1 SV=1	Orange	0.03091		1.32193
Hippocampus	Q6AYT3	Rtcb	RNA-splicing ligase RtcB homolog OS=Rattus norvegicus OX=10116 GN=Rtcb PE=2 SV=1	Blue	0.02602	Down	-0.678072
Hippocampus	Q63450	Camk1	Calcium/calmodulin-dependent protein kinase type 1 OS=Rattus norvegicus OX=10116 GN=Camk1 PE=1 SV=2	Orange	0.03264		-0.910733
Hippocampus	Q6PEC4	Skp1	S-phase kinase-associated protein 1 OS=Rattus norvegicus OX=10116 GN=Skp1 PE=1 SV=3	Red	0.03318		0.340075
Hippocampus	P62630	Eef1a1	Elongation factor 1-alpha 1 OS=Rattus norvegicus OX=10116 GN=Eef1a1 PE=2 SV=1	Red	0.0334		-0.226509
Hippocampus	B0BN85	Sugt1	Protein SGT1 homolog OS=Rattus norvegicus OX=10116 GN=Sugt1 PE=2 SV=1	Red	0.03368		-0.575312
Hippocampus	P12785	Fasn	Fatty acid synthase OS=Rattus norvegicus OX=10116 GN=Fasn PE=1 SV=3	Blue	0.03102	Down	-0.678072
Hippocampus	P20651	Ppp3cb	Serine/threonine-protein phosphatase 2B catalytic subunit beta isoform OS=Rattus norvegicus OX=10116 GN=Ppp3cb PE=1 SV=1	Red	0.03379		-0.214125
Hippocampus	P54319	Plaa	Phospholipase A-2-activating protein OS=Rattus norvegicus OX=10116 GN=Plaa PE=1 SV=3	Orange	0.03389		2.12029
Hippocampus	O08651	Phgdh	D-3-phosphoglycerate dehydrogenase OS=Rattus norvegicus OX=10116 GN=Phgdh PE=1 SV=3	Blue	0.04131	Down	-0.731183
Hippocampus	P09495	Tpm4	Tropomyosin alpha-4 chain OS=Rattus norvegicus OX=10116 GN=Tpm4 PE=1 SV=3	Orange	0.03395		1.21759
Hippocampus	Q68FR6	Eef1g	Elongation factor 1-gamma OS=Rattus norvegicus OX=10116 GN=Eef1g PE=2 SV=3	Red	0.0345		0.37707
Hippocampus	Q5RKI1	Eif4a2	Eukaryotic initiation factor 4A-II OS=Rattus norvegicus OX=10116 GN=Eif4a2 PE=1 SV=1	Red	0.03478		-0.275007
Hippocampus	Q5I0G4	Gars1	Glycine--tRNA ligase OS=Rattus norvegicus OX=10116 GN=Gars1 PE=1 SV=2	Blue	0.01771	Down	-0.757023
Hippocampus	P20650	Ppm1a	Protein phosphatase 1A OS=Rattus norvegicus OX=10116 GN=Ppm1a PE=1 SV=1	Orange	0.03517		-1.69153
Hippocampus	P17425	Hmgcs1	Hydroxymethylglutaryl-CoA synthase, cytoplasmic OS=Rattus norvegicus OX=10116 GN=Hmgcs1 PE=1 SV=1	Red	0.03527		-0.516015
Hippocampus	Q9Z1B2	Gstm5	Glutathione S-transferase Mu 5 OS=Rattus norvegicus OX=10116 GN=Gstm5 PE=1 SV=3	Blue	0.03395	Down	-0.773996
Hippocampus	P17764	Acat1	Acetyl-CoA acetyltransferase, mitochondrial OS=Rattus norvegicus OX=10116 GN=Acat1 PE=1 SV=1	Red	0.0357		0.340075
Hippocampus	A0A0G2JUG7	Iqsec1	IQ motif and SEC7 domain-containing protein 1 OS=Rattus norvegicus OX=10116 GN=Iqsec1 PE=1 SV=1	Orange	0.03596		1.39593
Hippocampus	Q9WVB1	Rab6a	Ras-related protein Rab-6A OS=Rattus norvegicus OX=10116 GN=Rab6a PE=1 SV=2	Red	0.036		-0.432959
Hippocampus	Q641Z6	Ehd1	EH domain-containing protein 1 OS=Rattus norvegicus OX=10116 GN=Ehd1 PE=1 SV=1	Orange	0.03623		-1.73985
Hippocampus	B5DF91	Elavl1	ELAV-like protein 1 OS=Rattus norvegicus OX=10116 GN=Elavl1 PE=1 SV=1	Orange	0.03638		0.68966
Hippocampus	Q5U211	Snx3	Sorting nexin-3 OS=Rattus norvegicus OX=10116 GN=Snx3 PE=1 SV=1	Red	0.03685		0.494109
Hippocampus	B5DFN2	Ahcyl1	S-adenosylhomocysteine hydrolase-like protein 1 OS=Rattus norvegicus OX=10116 GN=Ahcyl1 PE=1 SV=2	Red	0.03686		-0.422233
Hippocampus	O88339	Epn1	Epsin-1 OS=Rattus norvegicus OX=10116 GN=Epn1 PE=1 SV=1	Orange	0.03702		-0.748461
Hippocampus	P07936	Gap43	Neuromodulin OS=Rattus norvegicus OX=10116 GN=Gap43 PE=1 SV=1	Orange	0.03703		1
Hippocampus	P40307	Psmb2	Proteasome subunit beta type-2 OS=Rattus norvegicus OX=10116 GN=Psmb2 PE=1 SV=1	Red	0.0372		-0.495695
Hippocampus	Q5M7A7	Cnrip1	CB1 cannabinoid receptor-interacting protein 1 OS=Rattus norvegicus OX=10116 GN=Cnrip1 PE=1 SV=1	Red	0.03721		0.494109
Hippocampus	P47860	Pfkp	ATP-dependent 6-phosphofructokinase, platelet type OS=Rattus norvegicus OX=10116 GN=Pfkp PE=1 SV=2	Red	0.03723		0.434403
Hippocampus	Q5HZV9	Ppp1r7	Protein phosphatase 1 regulatory subunit 7 OS=Rattus norvegicus OX=10116 GN=Ppp1r7 PE=1 SV=1	Blue	0.00033	Down	-0.790772
Hippocampus	P63047	Sult4a1	Sulfotransferase 4A1 OS=Rattus norvegicus OX=10116 GN=Sult4a1 PE=1 SV=1	Orange	0.03739		-0.948601
Hippocampus	Q99MS0	Sec14l2	SEC14-like protein 2 OS=Rattus norvegicus OX=10116 GN=Sec14l2 PE=1 SV=1	Red	0.03741		-0.516015
Hippocampus	O35094	Timm44	Mitochondrial import inner membrane translocase subunit TIM44 OS=Rattus norvegicus OX=10116 GN=Timm44 PE=1 SV=1	Orange	0.03785		1
Hippocampus	O09175	Rnpep	Aminopeptidase B OS=Rattus norvegicus OX=10116 GN=Rnpep PE=1 SV=2	Blue	0.00145	Down	-0.799087
Hippocampus	Q02589	Adprh	ADP-ribosylhydrolase ARH1 OS=Rattus norvegicus OX=10116 GN=Adprh PE=1 SV=2	Orange	0.03791		-1.18269
Hippocampus	Q5M821	Ppm1h	Protein phosphatase 1H OS=Rattus norvegicus OX=10116 GN=Ppm1h PE=1 SV=2	Red	0.03832		0.643856
Hippocampus	Q6AYS7	Acy1a	Aminoacylase-1A OS=Rattus norvegicus OX=10116 GN=Acy1a PE=1 SV=1	Orange	0.03878		-0.963474
Hippocampus	P52481	Cap2	Adenylyl cyclase-associated protein 2 OS=Rattus norvegicus OX=10116 GN=Cap2 PE=1 SV=1	Blue	0.00038	Down	-0.807355
Hippocampus	P62755	Rps6	40S ribosomal protein S6 OS=Rattus norvegicus OX=10116 GN=Rps6 PE=1 SV=1	Red	0.04015		0.304006
Hippocampus	P97546	Nptn	Neuroplastin OS=Rattus norvegicus OX=10116 GN=Nptn PE=1 SV=2	Orange	0.04113		1.12029
Hippocampus	Q99JD4	Clasp2	CLIP-associating protein 2 OS=Rattus norvegicus OX=10116 GN=Clasp2 PE=1 SV=1	Red	0.0413		0.473931
Hippocampus	Q8R431	Mgll	Monoglyceride lipase OS=Rattus norvegicus OX=10116 GN=Mgll PE=1 SV=1	Blue	0.01859	Down	-0.910733
Hippocampus	Q9QYF3	Myo5a	Unconventional myosin-Va OS=Rattus norvegicus OX=10116 GN=Myo5a PE=1 SV=1	Red	0.04155		0.535332
Hippocampus	P12711	Adh5	Alcohol dehydrogenase class-3 OS=Rattus norvegicus OX=10116 GN=Adh5 PE=1 SV=2	Red	0.04164		-0.594549
Hippocampus	Q4KM49	Yars1	Tyrosine--tRNA ligase, cytoplasmic OS=Rattus norvegicus OX=10116 GN=Yars1 PE=2 SV=3	Red	0.04178		-0.422233
Hippocampus	Q6XVN8	Map1lc3a	Microtubule-associated proteins 1A/1B light chain 3A OS=Rattus norvegicus OX=10116 GN=Map1lc3a PE=1 SV=1	Red	0.0425		0.251539
Hippocampus	P47709	Rph3a	Rabphilin-3A OS=Rattus norvegicus OX=10116 GN=Rph3a PE=1 SV=1	Blue	0.0479	Down	-0.9855
Hippocampus	P62271	Rps18	40S ribosomal protein S18 OS=Rattus norvegicus OX=10116 GN=Rps18 PE=1 SV=3	Red	0.04308		0.395929
Hippocampus	Q920J4	Txnl1	Thioredoxin-like protein 1 OS=Rattus norvegicus OX=10116 GN=Txnl1 PE=1 SV=3	Red	0.04349		-0.389567
Hippocampus	P23785	Grn	Progranulin OS=Rattus norvegicus OX=10116 GN=Grn PE=1 SV=3	Orange	0.0439		1.35845
Hippocampus	P63004	Pafah1b1	Platelet-activating factor acetylhydrolase IB subunit alpha OS=Rattus norvegicus OX=10116 GN=Pafah1b1 PE=1 SV=2	Red	0.04449		-0.411426
Hippocampus	Q5PQJ6	Pycr3	Pyrroline-5-carboxylate reductase 3 OS=Rattus norvegicus OX=10116 GN=Pycr3 PE=2 SV=1	Orange	0.04496		1.02915
Hippocampus	O35263	Pafah1b3	Platelet-activating factor acetylhydrolase IB subunit alpha1 OS=Rattus norvegicus OX=10116 GN=Pafah1b3 PE=1 SV=1	Orange	0.04498		1.21759
Hippocampus	Q99PD4	Arpc1a	Actin-related protein 2/3 complex subunit 1A OS=Rattus norvegicus OX=10116 GN=Arpc1a PE=2 SV=1	Red	0.04507		-0.176323
Hippocampus	P56558	Ogt	UDP-N-acetylglucosamine--peptide N-acetylglucosaminyltransferase 110 kDa subunit OS=Rattus norvegicus OX=10116 GN=Ogt PE=1 SV=1	Red	0.04569		-0.432959
Hippocampus	Q3T1J1	Eif5a	Eukaryotic translation initiation factor 5A-1 OS=Rattus norvegicus OX=10116 GN=Eif5a PE=1 SV=3	Red	0.04588		-0.286881
Hippocampus	F1LQY6	Necab2	N-terminal EF-hand calcium-binding protein 2 OS=Rattus norvegicus OX=10116 GN=Necab2 PE=1 SV=3	Blue	0.00034	Down	-1.29278
Hippocampus	Q9Z1P2	Actn1	Alpha-actinin-1 OS=Rattus norvegicus OX=10116 GN=Actn1 PE=1 SV=1	Red	0.04782		0.666576
Hippocampus	P52555	Erp29	Endoplasmic reticulum resident protein 29 OS=Rattus norvegicus OX=10116 GN=Erp29 PE=1 SV=2	Blue	0.03985	Down	-1.82375
Hippocampus	P61972	Nutf2	Nuclear transport factor 2 OS=Rattus norvegicus OX=10116 GN=Nutf2 PE=1 SV=1	Blue	0.00028	Down	-2.09424
Hippocampus	Q91Y78	Uchl3	Ubiquitin carboxyl-terminal hydrolase isozyme L3 OS=Rattus norvegicus OX=10116 GN=Uchl3 PE=1 SV=1	Blue	0.02745	Down	-3.34908
Hippocampus	Q9Z269	Vapb	Vesicle-associated membrane protein-associated protein B OS=Rattus norvegicus OX=10116 GN=Vapb PE=1 SV=3	Orange	0.04811		1.59946
Hippocampus	Q68FW9	Cops3	COP9 signalosome complex subunit 3 OS=Rattus norvegicus OX=10116 GN=Cops3 PE=1 SV=1	Red	0.04831		-0.704872
Hippocampus	P13264	Gls	Glutaminase kidney isoform, mitochondrial OS=Rattus norvegicus OX=10116 GN=Gls PE=1 SV=2	Red	0.04832		-0.464668
Hippocampus	P00787	Ctsb	Cathepsin B OS=Rattus norvegicus OX=10116 GN=Ctsb PE=1 SV=2	Red	0.0484		0.643856
Hippocampus	P02401	Rplp2	60S acidic ribosomal protein P2 OS=Rattus norvegicus OX=10116 GN=Rplp2 PE=1 SV=2	Red	0.04957		0.234465
Hippocampus	Q9QXU9	Pcsk1n	ProSAAS OS=Rattus norvegicus OX=10116 GN=Pcsk1n PE=1 SV=1	Red	0.05047		0.535332
Hippocampus	P82471	Gnaq	Guanine nucleotide-binding protein G(q) subunit alpha OS=Rattus norvegicus OX=10116 GN=Gnaq PE=2 SV=2	Green	0.05048		0.862496
Hippocampus	Q78P75	Dynll2	Dynein light chain 2, cytoplasmic OS=Rattus norvegicus OX=10116 GN=Dynll2 PE=1 SV=1	Green	0.05049		-1.62293
Hippocampus	Q9JLT0	Myh10	Myosin-10 OS=Rattus norvegicus OX=10116 GN=Myh10 PE=1 SV=1	Green	0.05054		1.35845
Hippocampus	P10960	Psap	Prosaposin OS=Rattus norvegicus OX=10116 GN=Psap PE=1 SV=1	Red	0.05058		0.304006
Hippocampus	Q6AYH5	Dctn2	Dynactin subunit 2 OS=Rattus norvegicus OX=10116 GN=Dctn2 PE=1 SV=1	Red	0.0511		-0.344828
Hippocampus	F1LP90	Mink1	Misshapen-like kinase 1 OS=Rattus norvegicus OX=10116 GN=Mink1 PE=1 SV=2	Green	0.05218		0.836501
Hippocampus	P30835	Pfkl	ATP-dependent 6-phosphofructokinase, liver type OS=Rattus norvegicus OX=10116 GN=Pfkl PE=1 SV=3	Red	0.05261		0.304006
Hippocampus	Q9Z2G8	Nap1l1	Nucleosome assembly protein 1-like 1 OS=Rattus norvegicus OX=10116 GN=Nap1l1 PE=1 SV=1	Red	0.05363		-0.286881
Hippocampus	O70257	Stx7	Syntaxin-7 OS=Rattus norvegicus OX=10116 GN=Stx7 PE=1 SV=4	Green	0.05417		1.8365
Hippocampus	P81155	Vdac2	Voltage-dependent anion-selective channel protein 2 OS=Rattus norvegicus OX=10116 GN=Vdac2 PE=1 SV=2	Green	0.05421		2.18442
Hippocampus	O55171	Acot2	Acyl-coenzyme A thioesterase 2, mitochondrial OS=Rattus norvegicus OX=10116 GN=Acot2 PE=1 SV=1	Green	0.05457		2.32193
Hippocampus	P80385	Prkag1	5'-AMP-activated protein kinase subunit gamma-1 OS=Rattus norvegicus OX=10116 GN=Prkag1 PE=1 SV=3	Green	0.0549		1.55639
Hippocampus	P24050	Rps5	40S ribosomal protein S5 OS=Rattus norvegicus OX=10116 GN=Rps5 PE=1 SV=3	Red	0.05527		0.358454
Hippocampus	Q1WIM3	Cadm3	Cell adhesion molecule 3 OS=Rattus norvegicus OX=10116 GN=Cadm3 PE=1 SV=1	Green	0.05532		1.12029
Hippocampus	Q5U2Q7	Etf1	Eukaryotic peptide chain release factor subunit 1 OS=Rattus norvegicus OX=10116 GN=Etf1 PE=2 SV=3	Red	0.05533		0.556393
Hippocampus	Q794E4	Hnrnpf	Heterogeneous nuclear ribonucleoprotein F OS=Rattus norvegicus OX=10116 GN=Hnrnpf PE=1 SV=3	Red	0.05666		-0.641546
Hippocampus	P62898	Cycs	Cytochrome c, somatic OS=Rattus norvegicus OX=10116 GN=Cycs PE=1 SV=2	Red	0.05699		0.37707
Hippocampus	O35077	Gpd1	Glycerol-3-phosphate dehydrogenase [NAD(+)], cytoplasmic OS=Rattus norvegicus OX=10116 GN=Gpd1 PE=1 SV=4	Red	0.0572		0.666576
Hippocampus	Q9WVC0	Septin7	Septin-7 OS=Rattus norvegicus OX=10116 GN=Septin7 PE=1 SV=1	Red	0.0575		0.304006
Hippocampus	P42123	Ldhb	L-lactate dehydrogenase B chain OS=Rattus norvegicus OX=10116 GN=Ldhb PE=1 SV=2	Red	0.0575		-0.298658
Hippocampus	Q9JLA3	Uggt1	UDP-glucose:glycoprotein glucosyltransferase 1 OS=Rattus norvegicus OX=10116 GN=Uggt1 PE=1 SV=2	Green	0.05754		-1.16993
Hippocampus	P02770	Alb	Albumin OS=Rattus norvegicus OX=10116 GN=Alb PE=1 SV=2	Red	0.0579		0.321928
Hippocampus	P14669	Anxa3	Annexin A3 OS=Rattus norvegicus OX=10116 GN=Anxa3 PE=1 SV=4	Green	0.05802		2.39593
Hippocampus	P55053	Fabp5	Fatty acid-binding protein 5 OS=Rattus norvegicus OX=10116 GN=Fabp5 PE=1 SV=3	Red	0.05814		0.454032
Hippocampus	P53042	Ppp5c	Serine/threonine-protein phosphatase 5 OS=Rattus norvegicus OX=10116 GN=Ppp5c PE=1 SV=1	Red	0.05824		-0.31034
Hippocampus	Q63345	Mog	Myelin-oligodendrocyte glycoprotein OS=Rattus norvegicus OX=10116 GN=Mog PE=1 SV=1	Green	0.05836		1.55639
Hippocampus	P48037	Anxa6	Annexin A6 OS=Rattus norvegicus OX=10116 GN=Anxa6 PE=1 SV=2	Green	0.0585		2.94342
Hippocampus	Q62826	Hnrnpm	Heterogeneous nuclear ribonucleoprotein M OS=Rattus norvegicus OX=10116 GN=Hnrnpm PE=1 SV=4	Red	0.05861		0.713119
Hippocampus	Q5QJC9	Bag5	BAG family molecular chaperone regulator 5 OS=Rattus norvegicus OX=10116 GN=Bag5 PE=1 SV=1	Red	0.05871		-0.594549
Hippocampus	Q9JK11	Rtn4	Reticulon-4 OS=Rattus norvegicus OX=10116 GN=Rtn4 PE=1 SV=1	Red	0.05971		-0.298658
Hippocampus	P62260	Ywhae	14-3-3 protein epsilon OS=Rattus norvegicus OX=10116 GN=Ywhae PE=1 SV=1	Red	0.0599		-0.201634
Hippocampus	P84083	Arf5	ADP-ribosylation factor 5 OS=Rattus norvegicus OX=10116 GN=Arf5 PE=1 SV=2	Red	0.0609		-0.516015
Hippocampus	P11232	Txn	Thioredoxin OS=Rattus norvegicus OX=10116 GN=Txn PE=1 SV=2	Red	0.0616		0.168123
Hippocampus	Q6MG60	Ddah2	N(G),N(G)-dimethylarginine dimethylaminohydrolase 2 OS=Rattus norvegicus OX=10116 GN=Ddah2 PE=1 SV=1	Green	0.06225		-0.799087
Hippocampus	P23978	Slc6a1	Sodium- and chloride-dependent GABA transporter 1 OS=Rattus norvegicus OX=10116 GN=Slc6a1 PE=1 SV=1	Green	0.06249		1.12029
Hippocampus	P19527	Nefl	Neurofilament light polypeptide OS=Rattus norvegicus OX=10116 GN=Nefl PE=1 SV=3	Red	0.06253		0.473931
Hippocampus	Q4G017	Nisch	Nischarin OS=Rattus norvegicus OX=10116 GN=Nisch PE=2 SV=2	Green	0.06268		-0.790772
Hippocampus	Q63692	Cdc37	Hsp90 co-chaperone Cdc37 OS=Rattus norvegicus OX=10116 GN=Cdc37 PE=1 SV=2	Red	0.06304		-0.356144
Hippocampus	P17105	Itpka	Inositol-trisphosphate 3-kinase A OS=Rattus norvegicus OX=10116 GN=Itpka PE=1 SV=3	Red	0.06322		-0.464668
Hippocampus	Q6AYT5	Armt1	Damage-control phosphatase ARMT1 OS=Rattus norvegicus OX=10116 GN=Armt1 PE=1 SV=1	Red	0.06363		-0.731183
Hippocampus	P62870	Elob	Elongin-B OS=Rattus norvegicus OX=10116 GN=Elob PE=1 SV=1	Red	0.06425		-0.214125
Hippocampus	B2GV06	Oxct1	Succinyl-CoA:3-ketoacid coenzyme A transferase 1, mitochondrial OS=Rattus norvegicus OX=10116 GN=Oxct1 PE=1 SV=1	Red	0.0645		-0.575312
Hippocampus	A0JPJ7	Ola1	Obg-like ATPase 1 OS=Rattus norvegicus OX=10116 GN=Ola1 PE=2 SV=1	Red	0.06524		-0.321928
Hippocampus	P11442	Cltc	Clathrin heavy chain 1 OS=Rattus norvegicus OX=10116 GN=Cltc PE=1 SV=3	Red	0.06632		-0.214125
Hippocampus	P54311	Gnb1	Guanine nucleotide-binding protein G(I)/G(S)/G(T) subunit beta-1 OS=Rattus norvegicus OX=10116 GN=Gnb1 PE=1 SV=4	Red	0.06668		0.454032
Hippocampus	P24368	Ppib	Peptidyl-prolyl cis-trans isomerase B OS=Rattus norvegicus OX=10116 GN=Ppib PE=1 SV=3	Red	0.06669		0.268817
Hippocampus	Q6IMY8	Hnrnpu	Heterogeneous nuclear ribonucleoprotein U OS=Rattus norvegicus OX=10116 GN=Hnrnpu PE=1 SV=1	Red	0.06684		-0.659925
Hippocampus	Q499N5	Acsf2	Medium-chain acyl-CoA ligase ACSF2, mitochondrial OS=Rattus norvegicus OX=10116 GN=Acsf2 PE=2 SV=1	Red	0.06798		-0.713696
Hippocampus	Q9ES21	Sacm1l	Phosphatidylinositol-3-phosphatase SAC1 OS=Rattus norvegicus OX=10116 GN=Sacm1l PE=1 SV=1	Red	0.06803		0.666576
Hippocampus	P08461	Dlat	Dihydrolipoyllysine-residue acetyltransferase component of pyruvate dehydrogenase complex, mitochondrial OS=Rattus norvegicus OX=10116 GN=Dlat PE=1 SV=3	Red	0.06806		0.268817
Hippocampus	P62859	Rps28	40S ribosomal protein S28 OS=Rattus norvegicus OX=10116 GN=Rps28 PE=1 SV=1	Red	0.06871		0.251539
Hippocampus	P63326	Rps10	40S ribosomal protein S10 OS=Rattus norvegicus OX=10116 GN=Rps10 PE=2 SV=1	Red	0.06876		0.37707
Hippocampus	Q9R0I8	Pip4k2a	Phosphatidylinositol 5-phosphate 4-kinase type-2 alpha OS=Rattus norvegicus OX=10116 GN=Pip4k2a PE=1 SV=1	Green	0.06904		1.12029
Hippocampus	P55051	Fabp7	Fatty acid-binding protein, brain OS=Rattus norvegicus OX=10116 GN=Fabp7 PE=1 SV=2	Red	0.06912		0.434403
Hippocampus	P24329	Tst	Thiosulfate sulfurtransferase OS=Rattus norvegicus OX=10116 GN=Tst PE=1 SV=3	Red	0.06942		-0.298658
Hippocampus	D3ZFD0	Myo18a	Unconventional myosin-XVIIIa OS=Rattus norvegicus OX=10116 GN=Myo18a PE=1 SV=2	Green	0.06943		1.2863
Hippocampus	Q4KLF8	Arpc5	Actin-related protein 2/3 complex subunit 5 OS=Rattus norvegicus OX=10116 GN=Arpc5 PE=1 SV=3	Red	0.07012		-0.641546
Hippocampus	Q5U316	Rab35	Ras-related protein Rab-35 OS=Rattus norvegicus OX=10116 GN=Rab35 PE=1 SV=1	Red	0.07117		0.514573
Hippocampus	P00406	Mtco2	Cytochrome c oxidase subunit 2 OS=Rattus norvegicus OX=10116 GN=Mtco2 PE=1 SV=3	Green	0.0714		1.35845
Hippocampus	P50554	Abat	4-aminobutyrate aminotransferase, mitochondrial OS=Rattus norvegicus OX=10116 GN=Abat PE=1 SV=3	Red	0.07146		-0.226509
Hippocampus	Q63610-2	Tpm3	Isoform 2 of Tropomyosin alpha-3 chain OS=Rattus norvegicus OX=10116 GN=Tpm3	Red	0.07211		0.286304
Hippocampus	P15087	Cpe	Carboxypeptidase E OS=Rattus norvegicus OX=10116 GN=Cpe PE=1 SV=1	Red	0.07228		0.494109
Hippocampus	Q925N3	Pex5l	PEX5-related protein OS=Rattus norvegicus OX=10116 GN=Pex5l PE=1 SV=1	Red	0.07303		-0.584963
Hippocampus	Q5U1Z0	Rab3gap2	Rab3 GTPase-activating protein non-catalytic subunit OS=Rattus norvegicus OX=10116 GN=Rab3gap2 PE=1 SV=2	Green	0.07309		-2.19219
Hippocampus	O88600	Hspa4	Heat shock 70 kDa protein 4 OS=Rattus norvegicus OX=10116 GN=Hspa4 PE=1 SV=1	Red	0.07387		-0.163499
Hippocampus	Q09073	Slc25a5	ADP/ATP translocase 2 OS=Rattus norvegicus OX=10116 GN=Slc25a5 PE=1 SV=3	Green	0.07392		2.39593
Hippocampus	Q05683	Gad2	Glutamate decarboxylase 2 OS=Rattus norvegicus OX=10116 GN=Gad2 PE=1 SV=1	Red	0.07418		0.268817
Hippocampus	P49911	Anp32a	Acidic leucine-rich nuclear phosphoprotein 32 family member A OS=Rattus norvegicus OX=10116 GN=Anp32a PE=2 SV=1	Red	0.07492		-0.505891
Hippocampus	Q07009	Capn2	Calpain-2 catalytic subunit OS=Rattus norvegicus OX=10116 GN=Capn2 PE=1 SV=3	Red	0.07494		0.217591
Hippocampus	P62198	Psmc5	26S proteasome regulatory subunit 8 OS=Rattus norvegicus OX=10116 GN=Psmc5 PE=1 SV=1	Red	0.07557		-0.356144
Hippocampus	P08009	Gstm7	Glutathione S-transferase Mu 7 OS=Rattus norvegicus OX=10116 GN=Gstm7 PE=1 SV=2	Red	0.07618		-0.389567
Hippocampus	P62718	Rpl18a	60S ribosomal protein L18a OS=Rattus norvegicus OX=10116 GN=Rpl18a PE=2 SV=1	Red	0.07675		0.621488
Hippocampus	Q66HL2	Cttn	Src substrate cortactin OS=Rattus norvegicus OX=10116 GN=Cttn PE=1 SV=1	Red	0.07755		-0.367371
Hippocampus	P34067	Psmb4	Proteasome subunit beta type-4 OS=Rattus norvegicus OX=10116 GN=Psmb4 PE=1 SV=2	Red	0.07819		-0.389567
Hippocampus	Q5XFX0	Tagln2	Transgelin-2 OS=Rattus norvegicus OX=10116 GN=Tagln2 PE=1 SV=1	Green	0.07833		2.25154
Hippocampus	P14604	Echs1	Enoyl-CoA hydratase, mitochondrial OS=Rattus norvegicus OX=10116 GN=Echs1 PE=1 SV=1	Red	0.07847		-0.594549
Hippocampus	P52873	Pc	Pyruvate carboxylase, mitochondrial OS=Rattus norvegicus OX=10116 GN=Pc PE=1 SV=2	Red	0.07881		-0.594549
Hippocampus	P63102	Ywhaz	14-3-3 protein zeta/delta OS=Rattus norvegicus OX=10116 GN=Ywhaz PE=1 SV=1	Red	0.07935		-0.0976108
Hippocampus	P38656	Ssb	Lupus La protein homolog OS=Rattus norvegicus OX=10116 GN=Ssb PE=1 SV=1	Red	0.07989		0.358454
Hippocampus	Q9Z2F5	Ctbp1	C-terminal-binding protein 1 OS=Rattus norvegicus OX=10116 GN=Ctbp1 PE=1 SV=3	Red	0.07991		-0.298658
Hippocampus	P86252	Pura	Transcriptional activator protein Pur-alpha (Fragments) OS=Rattus norvegicus OX=10116 GN=Pura PE=1 SV=1	Red	0.07994		-0.344828
Hippocampus	Q794F9	Slc3a2	4F2 cell-surface antigen heavy chain OS=Rattus norvegicus OX=10116 GN=Slc3a2 PE=1 SV=1	Green	0.08057		1.47393
Hippocampus	Q6P4Z6	Lcmt1	Leucine carboxyl methyltransferase 1 OS=Rattus norvegicus OX=10116 GN=Lcmt1 PE=2 SV=1	Red	0.08066		-0.604071
Hippocampus	P32551	Uqcrc2	Cytochrome b-c1 complex subunit 2, mitochondrial OS=Rattus norvegicus OX=10116 GN=Uqcrc2 PE=1 SV=2	Green	0.08173		1.88897
Hippocampus	Q568Z9	Phyhip	Phytanoyl-CoA hydroxylase-interacting protein OS=Rattus norvegicus OX=10116 GN=Phyhip PE=2 SV=1	Red	0.08192		-0.31034
Hippocampus	Q6AYN4	Phyhipl	Phytanoyl-CoA hydroxylase-interacting protein-like OS=Rattus norvegicus OX=10116 GN=Phyhipl PE=1 SV=2	Green	0.08201		0.785875
Hippocampus	Q9ER24	Atxn10	Ataxin-10 OS=Rattus norvegicus OX=10116 GN=Atxn10 PE=1 SV=1	Red	0.08219		0.577767
Hippocampus	P36201	Crip2	Cysteine-rich protein 2 OS=Rattus norvegicus OX=10116 GN=Crip2 PE=2 SV=1	Green	0.0823		1.59946
Hippocampus	Q9Z0J8	Negr1	Neuronal growth regulator 1 OS=Rattus norvegicus OX=10116 GN=Negr1 PE=1 SV=1	Green	0.08332		1.68966
Hippocampus	Q62717	Cadps	Calcium-dependent secretion activator 1 OS=Rattus norvegicus OX=10116 GN=Cadps PE=1 SV=1	Red	0.08343		-0.263034
Hippocampus	Q9QZA2	Pdcd6ip	Programmed cell death 6-interacting protein OS=Rattus norvegicus OX=10116 GN=Pdcd6ip PE=1 SV=2	Green	0.08354		-1.12433
Hippocampus	B0BNM1	Naxe	NAD(P)H-hydrate epimerase OS=Rattus norvegicus OX=10116 GN=Naxe PE=2 SV=1	Red	0.08367		-0.536053
Hippocampus	P12839	Nefm	Neurofilament medium polypeptide OS=Rattus norvegicus OX=10116 GN=Nefm PE=1 SV=4	Green	0.08398		1.59946
Hippocampus	Q5XI32	Capzb	F-actin-capping protein subunit beta OS=Rattus norvegicus OX=10116 GN=Capzb PE=1 SV=1	Red	0.08532		-0.176323
Hippocampus	Q5I6B8	Pip5k1c	Phosphatidylinositol 4-phosphate 5-kinase type-1 gamma OS=Rattus norvegicus OX=10116 GN=Pip5k1c PE=1 SV=1	Green	0.08594		-1.30451
Hippocampus	Q63569	Psmc3	26S proteasome regulatory subunit 6A OS=Rattus norvegicus OX=10116 GN=Psmc3 PE=1 SV=1	Red	0.08643		-0.275007
Hippocampus	Q62718	Ntm	Neurotrimin OS=Rattus norvegicus OX=10116 GN=Ntm PE=1 SV=1	Green	0.08673		0.862496
Hippocampus	Q923S8	Pank4	4'-phosphopantetheine phosphatase OS=Rattus norvegicus OX=10116 GN=Pank4 PE=1 SV=1	Green	0.08685		-0.963474
Hippocampus	Q5XI78	Ogdh	2-oxoglutarate dehydrogenase, mitochondrial OS=Rattus norvegicus OX=10116 GN=Ogdh PE=1 SV=1	Red	0.08692		0.395929
Hippocampus	P10111	Ppia	Peptidyl-prolyl cis-trans isomerase A OS=Rattus norvegicus OX=10116 GN=Ppia PE=1 SV=2	Red	0.08739		-0.226509
Hippocampus	P35571	Gpd2	Glycerol-3-phosphate dehydrogenase, mitochondrial OS=Rattus norvegicus OX=10116 GN=Gpd2 PE=1 SV=1	Green	0.08796		1.64386
Hippocampus	Q4FZY0	Efhd2	EF-hand domain-containing protein D2 OS=Rattus norvegicus OX=10116 GN=Efhd2 PE=1 SV=1	Red	0.08817		0.68966
Hippocampus	P15178	Dars1	Aspartate--tRNA ligase, cytoplasmic OS=Rattus norvegicus OX=10116 GN=Dars1 PE=1 SV=1	Red	0.08832		0.321928
Hippocampus	P18420	Psma1	Proteasome subunit alpha type-1 OS=Rattus norvegicus OX=10116 GN=Psma1 PE=1 SV=2	Red	0.08859		-0.31034
Hippocampus	P40241	Cd9	CD9 antigen OS=Rattus norvegicus OX=10116 GN=Cd9 PE=1 SV=2	Green	0.08879		1.02915
Hippocampus	P68255	Ywhaq	14-3-3 protein theta OS=Rattus norvegicus OX=10116 GN=Ywhaq PE=1 SV=1	Red	0.08883		-0.124328
Hippocampus	P13676	Apeh	Acylamino-acid-releasing enzyme OS=Rattus norvegicus OX=10116 GN=Apeh PE=1 SV=1	Red	0.09069		-0.575312
Hippocampus	F1LN46	Cpt1c	Carnitine O-palmitoyltransferase 1, brain isoform OS=Rattus norvegicus OX=10116 GN=Cpt1c PE=1 SV=1	Green	0.09197		2
Hippocampus	Q792I0	Lin7c	Protein lin-7 homolog C OS=Rattus norvegicus OX=10116 GN=Lin7c PE=1 SV=1	Red	0.09333		-0.432959
Hippocampus	Q68FS2	Cops4	COP9 signalosome complex subunit 4 OS=Rattus norvegicus OX=10116 GN=Cops4 PE=1 SV=1	Red	0.09352		-0.286881
Hippocampus	P69735	Rab3gap1	Rab3 GTPase-activating protein catalytic subunit (Fragments) OS=Rattus norvegicus OX=10116 GN=Rab3gap1 PE=1 SV=2	Green	0.09363		1.05889
Hippocampus	P13697	Me1	NADP-dependent malic enzyme OS=Rattus norvegicus OX=10116 GN=Me1 PE=1 SV=2	Red	0.09379		-0.464668
Hippocampus	Q6P799	Sars1	Serine--tRNA ligase, cytoplasmic OS=Rattus norvegicus OX=10116 GN=Sars1 PE=1 SV=3	Red	0.09415		-0.378512
Hippocampus	P05197	Eef2	Elongation factor 2 OS=Rattus norvegicus OX=10116 GN=Eef2 PE=1 SV=4	Red	0.09422		-0.238787
Hippocampus	Q9QYW3	Mob4	MOB-like protein phocein OS=Rattus norvegicus OX=10116 GN=Mob4 PE=1 SV=1	Green	0.09456		-0.963474
Hippocampus	Q7M767	Ube2v2	Ubiquitin-conjugating enzyme E2 variant 2 OS=Rattus norvegicus OX=10116 GN=Ube2v2 PE=1 SV=3	Red	0.09492		-0.31034
Hippocampus	Q91ZN1	Coro1a	Coronin-1A OS=Rattus norvegicus OX=10116 GN=Coro1a PE=1 SV=3	Red	0.09539		-0.333424
Hippocampus	P18484	Ap2a2	AP-2 complex subunit alpha-2 OS=Rattus norvegicus OX=10116 GN=Ap2a2 PE=1 SV=3	Red	0.09557		0.234465
Hippocampus	Q9QZM5	Abi1	Abl interactor 1 OS=Rattus norvegicus OX=10116 GN=Abi1 PE=1 SV=3	Red	0.0956		-0.536053
Hippocampus	Q9WU49	Carhsp1	Calcium-regulated heat stable protein 1 OS=Rattus norvegicus OX=10116 GN=Carhsp1 PE=1 SV=1	Red	0.09593		0.494109
Hippocampus	H1UBN0	Cpne7	Copine-7 OS=Rattus norvegicus OX=10116 GN=Cpne7 PE=1 SV=1	Green	0.09609		2.18442
Hippocampus	P38650	Dync1h1	Cytoplasmic dynein 1 heavy chain 1 OS=Rattus norvegicus OX=10116 GN=Dync1h1 PE=1 SV=1	Red	0.09625		-0.238787
Hippocampus	P47198	Rpl22	60S ribosomal protein L22 OS=Rattus norvegicus OX=10116 GN=Rpl22 PE=2 SV=2	Red	0.09653		-0.286881
Hippocampus	Q6AYG5	Echdc1	Ethylmalonyl-CoA decarboxylase OS=Rattus norvegicus OX=10116 GN=Echdc1 PE=1 SV=1	Red	0.09701		-0.613532
Hippocampus	P54290	Cacna2d1	Voltage-dependent calcium channel subunit alpha-2/delta-1 OS=Rattus norvegicus OX=10116 GN=Cacna2d1 PE=1 SV=1	Green	0.09778		1.59946
Hippocampus	P35704	Prdx2	Peroxiredoxin-2 OS=Rattus norvegicus OX=10116 GN=Prdx2 PE=1 SV=3	Red	0.09818		-0.226509
Hippocampus	P18297	Spr	Sepiapterin reductase OS=Rattus norvegicus OX=10116 GN=Spr PE=1 SV=1	Green	0.09833		1.55639
Hippocampus	P69897	Tubb5	Tubulin beta-5 chain OS=Rattus norvegicus OX=10116 GN=Tubb5 PE=1 SV=1	Red	0.09885		-0.214125
Hippocampus	P97615	Txn2	Thioredoxin, mitochondrial OS=Rattus norvegicus OX=10116 GN=Txn2 PE=2 SV=1	Red	0.10086		-0.226509
Hippocampus	Q8VIL3	Zwint	ZW10 interactor OS=Rattus norvegicus OX=10116 GN=Zwint PE=1 SV=1	Green	0.10096		1.51457
Hippocampus	Q6PCU2	Atp6v1e1	V-type proton ATPase subunit E 1 OS=Rattus norvegicus OX=10116 GN=Atp6v1e1 PE=1 SV=1	Red	0.10126		-0.367371
Hippocampus	Q63610	Tpm3	Tropomyosin alpha-3 chain OS=Rattus norvegicus OX=10116 GN=Tpm3 PE=1 SV=2	Red	0.10185		-0.632268
Hippocampus	Q8K4Y5	Lgi1	Leucine-rich glioma-inactivated protein 1 OS=Rattus norvegicus OX=10116 GN=Lgi1 PE=1 SV=1	Red	0.10195		0.810966
Hippocampus	P34064	Psma5	Proteasome subunit alpha type-5 OS=Rattus norvegicus OX=10116 GN=Psma5 PE=1 SV=1	Red	0.10196		-0.286881
Hippocampus	Q63009	Prmt1	Protein arginine N-methyltransferase 1 OS=Rattus norvegicus OX=10116 GN=Prmt1 PE=1 SV=1	Red	0.10201		0.761213
Hippocampus	Q9ESB5	Necab1	N-terminal EF-hand calcium-binding protein 1 OS=Rattus norvegicus OX=10116 GN=Necab1 PE=1 SV=1	Green	0.10243		-0.879706
Hippocampus	P42346	Mtor	Serine/threonine-protein kinase mTOR OS=Rattus norvegicus OX=10116 GN=Mtor PE=1 SV=1	Green	0.10292		1.51457
Hippocampus	Q02356	Ampd2	AMP deaminase 2 OS=Rattus norvegicus OX=10116 GN=Ampd2 PE=1 SV=2	Red	0.10337		-0.536053
Hippocampus	Q8VHK7	Hdgf	Hepatoma-derived growth factor OS=Rattus norvegicus OX=10116 GN=Hdgf PE=1 SV=2	Red	0.10391		0.666576
Hippocampus	Q9JID2	Gna11	Guanine nucleotide-binding protein subunit alpha-11 OS=Rattus norvegicus OX=10116 GN=Gna11 PE=2 SV=1	Green	0.10482		1.152
Hippocampus	P11275	Camk2a	Calcium/calmodulin-dependent protein kinase type II subunit alpha OS=Rattus norvegicus OX=10116 GN=Camk2a PE=1 SV=1	Red	0.10492		-0.526069
Hippocampus	P19945	Rplp0	60S acidic ribosomal protein P0 OS=Rattus norvegicus OX=10116 GN=Rplp0 PE=1 SV=2	Red	0.10614		0.454032
Hippocampus	O89046	Coro1b	Coronin-1B OS=Rattus norvegicus OX=10116 GN=Coro1b PE=1 SV=1	Red	0.10649		-0.505891
Hippocampus	A1L1I3	Numbl	Numb-like protein OS=Rattus norvegicus OX=10116 GN=Numbl PE=1 SV=1	Green	0.10683		1.21759
Hippocampus	Q5XHZ0	Trap1	Heat shock protein 75 kDa, mitochondrial OS=Rattus norvegicus OX=10116 GN=Trap1 PE=1 SV=1	Red	0.10733		0.785875
Hippocampus	P63041	Cplx1	Complexin-1 OS=Rattus norvegicus OX=10116 GN=Cplx1 PE=1 SV=1	Red	0.10892		-0.298658
Hippocampus	P03994	Hapln1	Hyaluronan and proteoglycan link protein 1 OS=Rattus norvegicus OX=10116 GN=Hapln1 PE=1 SV=2	Green	0.10985		-1.07039
Hippocampus	P62425	Rpl7a	60S ribosomal protein L7a OS=Rattus norvegicus OX=10116 GN=Rpl7a PE=1 SV=2	Red	0.10988		0.358454
Hippocampus	P46844	Blvra	Biliverdin reductase A OS=Rattus norvegicus OX=10116 GN=Blvra PE=1 SV=1	Red	0.11048		0.251539
Hippocampus	P18421	Psmb1	Proteasome subunit beta type-1 OS=Rattus norvegicus OX=10116 GN=Psmb1 PE=1 SV=3	Red	0.11052		-0.286881
Hippocampus	P05708	Hk1	Hexokinase-1 OS=Rattus norvegicus OX=10116 GN=Hk1 PE=1 SV=4	Red	0.11057		0.37707
Hippocampus	P21531	Rpl3	60S ribosomal protein L3 OS=Rattus norvegicus OX=10116 GN=Rpl3 PE=1 SV=3	Red	0.11109		0.340075
Hippocampus	P27867	Sord	Sorbitol dehydrogenase OS=Rattus norvegicus OX=10116 GN=Sord PE=1 SV=4	Red	0.11136		-0.367371
Hippocampus	P55068	Bcan	Brevican core protein OS=Rattus norvegicus OX=10116 GN=Bcan PE=1 SV=2	Red	0.1117		-0.378512
Hippocampus	Q1HCL7	Nadk2	NAD kinase 2, mitochondrial OS=Rattus norvegicus OX=10116 GN=Nadk2 PE=1 SV=1	Green	0.11208		0.915936
Hippocampus	Q07647	Slc2a3	Solute carrier family 2, facilitated glucose transporter member 3 OS=Rattus norvegicus OX=10116 GN=Slc2a3 PE=1 SV=1	Green	0.11228		1.02915
Hippocampus	Q566C7	Nudt3	Diphosphoinositol polyphosphate phosphohydrolase 1 OS=Rattus norvegicus OX=10116 GN=Nudt3 PE=1 SV=1	Red	0.11326		-0.356144
Hippocampus	Q6AY65	Arfip2	Arfaptin-2 OS=Rattus norvegicus OX=10116 GN=Arfip2 PE=2 SV=1	Green	0.11348		-1.61824
Hippocampus	P62250	Rps16	40S ribosomal protein S16 OS=Rattus norvegicus OX=10116 GN=Rps16 PE=1 SV=2	Red	0.11372		0.358454
Hippocampus	Q80Z30	Ppm1e	Protein phosphatase 1E OS=Rattus norvegicus OX=10116 GN=Ppm1e PE=1 SV=1	Red	0.11375		-0.214125
Hippocampus	D4ABY2	Copg2	Coatomer subunit gamma-2 OS=Rattus norvegicus OX=10116 GN=Copg2 PE=3 SV=2	Red	0.11397		-0.687061
Hippocampus	Q63754	Sncb	Beta-synuclein OS=Rattus norvegicus OX=10116 GN=Sncb PE=1 SV=1	Red	0.11433		-0.176323
Hippocampus	Q5EB77	Rab18	Ras-related protein Rab-18 OS=Rattus norvegicus OX=10116 GN=Rab18 PE=2 SV=1	Red	0.11449		0.395929
Hippocampus	Q05140-2	Snap91	Isoform 2 of Clathrin coat assembly protein AP180 OS=Rattus norvegicus OX=10116 GN=Snap91	Red	0.11449		0.340075
Hippocampus	P41542	Uso1	General vesicular transport factor p115 OS=Rattus norvegicus OX=10116 GN=Uso1 PE=1 SV=1	Red	0.11453		-0.275007
Hippocampus	P11762	Lgals1	Galectin-1 OS=Rattus norvegicus OX=10116 GN=Lgals1 PE=1 SV=2	Red	0.11488		0.68966
Hippocampus	M0RC99	Rab5a	Ras-related protein Rab-5A OS=Rattus norvegicus OX=10116 GN=Rab5a PE=2 SV=1	Red	0.11502		0.251539
Hippocampus	Q9QYC5	Gpr37l1	G-protein coupled receptor 37-like 1 OS=Rattus norvegicus OX=10116 GN=Gpr37l1 PE=1 SV=1	Green	0.11533		1.08927
Hippocampus	F1LMZ8	Psmd11	26S proteasome non-ATPase regulatory subunit 11 OS=Rattus norvegicus OX=10116 GN=Psmd11 PE=1 SV=2	Red	0.11607		-0.263034
Hippocampus	P46462	Vcp	Transitional endoplasmic reticulum ATPase OS=Rattus norvegicus OX=10116 GN=Vcp PE=1 SV=3	Red	0.11624		-0.163499
Hippocampus	P16617	Pgk1	Phosphoglycerate kinase 1 OS=Rattus norvegicus OX=10116 GN=Pgk1 PE=1 SV=2	Red	0.11799		-0.15056
Hippocampus	Q76EQ0	Srr	Serine racemase OS=Rattus norvegicus OX=10116 GN=Srr PE=1 SV=1	Red	0.11807		-0.443607
Hippocampus	Q8R478	Wbp2	WW domain-binding protein 2 OS=Rattus norvegicus OX=10116 GN=Wbp2 PE=1 SV=1	Green	0.11832		1
Hippocampus	P09812	Pygm	Glycogen phosphorylase, muscle form OS=Rattus norvegicus OX=10116 GN=Pygm PE=1 SV=5	Red	0.11946		-0.286881
Hippocampus	P62959	Hint1	Adenosine 5'-monophosphoramidase HINT1 OS=Rattus norvegicus OX=10116 GN=Hint1 PE=1 SV=5	Red	0.11965		-0.201634
Hippocampus	P24587	Akap5	A-kinase anchor protein 5 OS=Rattus norvegicus OX=10116 GN=Akap5 PE=1 SV=2	Red	0.12087		-0.443607
Hippocampus	P62775	Mtpn	Myotrophin OS=Rattus norvegicus OX=10116 GN=Mtpn PE=1 SV=2	Red	0.12095		-0.201634
Hippocampus	Q9QYL8	Lypla2	Acyl-protein thioesterase 2 OS=Rattus norvegicus OX=10116 GN=Lypla2 PE=1 SV=1	Red	0.1211		-0.604071
Hippocampus	Q9ES40	Arl6ip5	PRA1 family protein 3 OS=Rattus norvegicus OX=10116 GN=Arl6ip5 PE=1 SV=1	Red	0.12235		0.556393
Hippocampus	P62747	Rhob	Rho-related GTP-binding protein RhoB OS=Rattus norvegicus OX=10116 GN=Rhob PE=1 SV=1	Red	0.12273		0.621488
Hippocampus	Q68FX9	Sirt5	NAD-dependent protein deacylase sirtuin-5, mitochondrial OS=Rattus norvegicus OX=10116 GN=Sirt5 PE=2 SV=1	Red	0.12325		-0.389567
Hippocampus	P19468	Gclc	Glutamate--cysteine ligase catalytic subunit OS=Rattus norvegicus OX=10116 GN=Gclc PE=1 SV=2	Red	0.12391		-0.575312
Hippocampus	B5DFC8	Eif3c	Eukaryotic translation initiation factor 3 subunit C OS=Rattus norvegicus OX=10116 GN=Eif3c PE=1 SV=1	Red	0.12393		0.535332
Hippocampus	P97756	Camkk1	Calcium/calmodulin-dependent protein kinase kinase 1 OS=Rattus norvegicus OX=10116 GN=Camkk1 PE=1 SV=1	Red	0.12415		0.68966
Hippocampus	P60905	Dnajc5	DnaJ homolog subfamily C member 5 OS=Rattus norvegicus OX=10116 GN=Dnajc5 PE=1 SV=1	Red	0.12487		0.340075
Hippocampus	B2RYG6	Otub1	Ubiquitin thioesterase OTUB1 OS=Rattus norvegicus OX=10116 GN=Otub1 PE=1 SV=1	Red	0.12517		-0.214125
Hippocampus	Q71UE8	Nedd8	NEDD8 OS=Rattus norvegicus OX=10116 GN=Nedd8 PE=1 SV=1	Red	0.12538		-0.485427
Hippocampus	Q6AXT5	Rab21	Ras-related protein Rab-21 OS=Rattus norvegicus OX=10116 GN=Rab21 PE=2 SV=1	Red	0.12621		0.454032
Hippocampus	P20156	Vgf	Neurosecretory protein VGF OS=Rattus norvegicus OX=10116 GN=Vgf PE=1 SV=3	Green	0.12646		1.68966
Hippocampus	P23358	Rpl12	60S ribosomal protein L12 OS=Rattus norvegicus OX=10116 GN=Rpl12 PE=2 SV=1	Red	0.1269		0.304006
Hippocampus	P21913	Sdhb	Succinate dehydrogenase [ubiquinone] iron-sulfur subunit, mitochondrial OS=Rattus norvegicus OX=10116 GN=Sdhb PE=2 SV=2	Red	0.12811		-0.669027
Hippocampus	P07171	Calb1	Calbindin OS=Rattus norvegicus OX=10116 GN=Calb1 PE=1 SV=2	Red	0.12857		-0.378512
Hippocampus	Q63507	Rpl14	60S ribosomal protein L14 OS=Rattus norvegicus OX=10116 GN=Rpl14 PE=1 SV=3	Red	0.13066		0.321928
Hippocampus	Q6AZ50	Atg3	Ubiquitin-like-conjugating enzyme ATG3 OS=Rattus norvegicus OX=10116 GN=Atg3 PE=2 SV=1	Red	0.13078		-0.344828
Hippocampus	Q6P9U8	Eif3h	Eukaryotic translation initiation factor 3 subunit H OS=Rattus norvegicus OX=10116 GN=Eif3h PE=1 SV=1	Green	0.13112		0.888969
Hippocampus	P30009	Marcks	Myristoylated alanine-rich C-kinase substrate OS=Rattus norvegicus OX=10116 GN=Marcks PE=1 SV=2	Red	0.13136		0.666576
Hippocampus	P85108	Tubb2a	Tubulin beta-2A chain OS=Rattus norvegicus OX=10116 GN=Tubb2a PE=1 SV=1	Red	0.1318		-0.163499
Hippocampus	P28073	Psmb6	Proteasome subunit beta type-6 OS=Rattus norvegicus OX=10116 GN=Psmb6 PE=1 SV=3	Red	0.13188		-0.124328
Hippocampus	P00388	Por	NADPH--cytochrome P450 reductase OS=Rattus norvegicus OX=10116 GN=Por PE=1 SV=3	Green	0.13202		1.4344
Hippocampus	O70196	Prep	Prolyl endopeptidase OS=Rattus norvegicus OX=10116 GN=Prep PE=1 SV=1	Red	0.13235		-0.687061
Hippocampus	Q99JE4	Rasgrf2	Ras-specific guanine nucleotide-releasing factor 2 OS=Rattus norvegicus OX=10116 GN=Rasgrf2 PE=1 SV=1	Red	0.13248		-0.765535
Hippocampus	P62919	Rpl8	60S ribosomal protein L8 OS=Rattus norvegicus OX=10116 GN=Rpl8 PE=2 SV=2	Red	0.13248		0.286304
Hippocampus	P11598	Pdia3	Protein disulfide-isomerase A3 OS=Rattus norvegicus OX=10116 GN=Pdia3 PE=1 SV=2	Red	0.13264		-0.422233
Hippocampus	P11030	Dbi	Acyl-CoA-binding protein OS=Rattus norvegicus OX=10116 GN=Dbi PE=1 SV=3	Red	0.13279		-0.226509
Hippocampus	O08816	Wasl	Neural Wiskott-Aldrich syndrome protein OS=Rattus norvegicus OX=10116 GN=Wasl PE=1 SV=2	Red	0.13312		-0.594549
Hippocampus	P62193	Psmc1	26S proteasome regulatory subunit 4 OS=Rattus norvegicus OX=10116 GN=Psmc1 PE=1 SV=1	Red	0.13414		-0.367371
Hippocampus	P37996	Arl3	ADP-ribosylation factor-like protein 3 OS=Rattus norvegicus OX=10116 GN=Arl3 PE=1 SV=2	Red	0.13418		-0.275007
Hippocampus	D3ZHV2	Macf1	Microtubule-actin cross-linking factor 1 OS=Rattus norvegicus OX=10116 GN=Macf1 PE=1 SV=1	Red	0.13434		0.666576
Hippocampus	Q5RJR2	Twf1	Twinfilin-1 OS=Rattus norvegicus OX=10116 GN=Twf1 PE=1 SV=1	Red	0.1346		-0.464668
Hippocampus	P04041	Gpx1	Glutathione peroxidase 1 OS=Rattus norvegicus OX=10116 GN=Gpx1 PE=1 SV=4	Red	0.13567		0.321928
Hippocampus	Q5U1Z2	Trappc3	Trafficking protein particle complex subunit 3 OS=Rattus norvegicus OX=10116 GN=Trappc3 PE=2 SV=1	Red	0.13602		-0.545968
Hippocampus	P70619	Gsr	Glutathione reductase (Fragment) OS=Rattus norvegicus OX=10116 GN=Gsr PE=2 SV=2	Red	0.1364		-0.526069
Hippocampus	Q01986	Map2k1	Dual specificity mitogen-activated protein kinase kinase 1 OS=Rattus norvegicus OX=10116 GN=Map2k1 PE=1 SV=2	Red	0.1366		-0.238787
Hippocampus	Q6P7B0	Wars1	Tryptophan--tRNA ligase, cytoplasmic OS=Rattus norvegicus OX=10116 GN=Wars1 PE=1 SV=2	Red	0.13724		0.268817
Hippocampus	P50503	St13	Hsc70-interacting protein OS=Rattus norvegicus OX=10116 GN=St13 PE=1 SV=1	Red	0.13738		0.234465
Hippocampus	P18445	Rpl27a	60S ribosomal protein L27a OS=Rattus norvegicus OX=10116 GN=Rpl27a PE=1 SV=3	Red	0.13745		0.304006
Hippocampus	P10536	Rab1b	Ras-related protein Rab-1B OS=Rattus norvegicus OX=10116 GN=Rab1b PE=1 SV=1	Red	0.13749		0.395929
Hippocampus	P47858	Pfkm	ATP-dependent 6-phosphofructokinase, muscle type OS=Rattus norvegicus OX=10116 GN=Pfkm PE=1 SV=3	Red	0.13858		-0.163499
Hippocampus	P48500	Tpi1	Triosephosphate isomerase OS=Rattus norvegicus OX=10116 GN=Tpi1 PE=1 SV=2	Red	0.1392		0.152003
Hippocampus	D3ZAA9	Mpp2	MAGUK p55 subfamily member 2 OS=Rattus norvegicus OX=10116 GN=Mpp2 PE=1 SV=2	Red	0.13995		0.68966
Hippocampus	Q6AYE2	Sh3glb1	Endophilin-B1 OS=Rattus norvegicus OX=10116 GN=Sh3glb1 PE=2 SV=1	Red	0.13997		0.785875
Hippocampus	Q6P9T8	Tubb4b	Tubulin beta-4B chain OS=Rattus norvegicus OX=10116 GN=Tubb4b PE=1 SV=1	Red	0.14032		-0.201634
Hippocampus	Q6P7R8	Hsd17b12	Very-long-chain 3-oxoacyl-CoA reductase OS=Rattus norvegicus OX=10116 GN=Hsd17b12 PE=2 SV=1	Green	0.1408		-2.76765
Hippocampus	O08700	Vps45	Vacuolar protein sorting-associated protein 45 OS=Rattus norvegicus OX=10116 GN=Vps45 PE=1 SV=1	Red	0.14083		0.666576
Hippocampus	P85971	Pgls	6-phosphogluconolactonase OS=Rattus norvegicus OX=10116 GN=Pgls PE=1 SV=1	Red	0.1413		-0.321928
Hippocampus	O35095	Ncdn	Neurochondrin OS=Rattus norvegicus OX=10116 GN=Ncdn PE=1 SV=2	Red	0.14163		-0.250962
Hippocampus	Q68FU3	Etfb	Electron transfer flavoprotein subunit beta OS=Rattus norvegicus OX=10116 GN=Etfb PE=1 SV=3	Red	0.14191		0.473931
Hippocampus	Q99MZ8	Lasp1	LIM and SH3 domain protein 1 OS=Rattus norvegicus OX=10116 GN=Lasp1 PE=1 SV=1	Red	0.14223		-0.321928
Hippocampus	O35142	Copb2	Coatomer subunit beta' OS=Rattus norvegicus OX=10116 GN=Copb2 PE=1 SV=3	Red	0.14229		0.556393
Hippocampus	P10687	Plcb1	1-phosphatidylinositol 4,5-bisphosphate phosphodiesterase beta-1 OS=Rattus norvegicus OX=10116 GN=Plcb1 PE=1 SV=1	Red	0.14254		0.577767
Hippocampus	P50398	Gdi1	Rab GDP dissociation inhibitor alpha OS=Rattus norvegicus OX=10116 GN=Gdi1 PE=1 SV=1	Red	0.14451		-0.137504
Hippocampus	Q8VIJ5	Oga	Protein O-GlcNAcase OS=Rattus norvegicus OX=10116 GN=Oga PE=1 SV=1	Red	0.14471		0.535332
Hippocampus	A0A0G2JV04	Gga3	ADP-ribosylation factor-binding protein GGA3 OS=Rattus norvegicus OX=10116 GN=Gga3 PE=1 SV=1	Green	0.14626		2.18442
Hippocampus	D3ZDK7	Pgp	Glycerol-3-phosphate phosphatase OS=Rattus norvegicus OX=10116 GN=Pgp PE=1 SV=1	Red	0.1463		-0.526069
Hippocampus	Q62639	Rheb	GTP-binding protein Rheb OS=Rattus norvegicus OX=10116 GN=Rheb PE=1 SV=1	Red	0.1464		-0.367371
Hippocampus	P13852	Prnp	Major prion protein OS=Rattus norvegicus OX=10116 GN=Prnp PE=1 SV=2	Red	0.14689		0.434403
Hippocampus	Q01066	Pde1b	Calcium/calmodulin-dependent 3',5'-cyclic nucleotide phosphodiesterase 1B OS=Rattus norvegicus OX=10116 GN=Pde1b PE=1 SV=1	Red	0.14709		-0.659925
Hippocampus	Q3KRD5	Tomm34	Mitochondrial import receptor subunit TOM34 OS=Rattus norvegicus OX=10116 GN=Tomm34 PE=1 SV=1	Red	0.14757		0.434403
Hippocampus	P11980	Pkm	Pyruvate kinase PKM OS=Rattus norvegicus OX=10116 GN=Pkm PE=1 SV=3	Red	0.14849		-0.286881
Hippocampus	P35565	Canx	Calnexin OS=Rattus norvegicus OX=10116 GN=Canx PE=1 SV=1	Red	0.14872		0.37707
Hippocampus	Q32Q06	Ap1m1	AP-1 complex subunit mu-1 OS=Rattus norvegicus OX=10116 GN=Ap1m1 PE=1 SV=3	Red	0.14893		0.761213
Hippocampus	Q6P4Z9	Cops8	COP9 signalosome complex subunit 8 OS=Rattus norvegicus OX=10116 GN=Cops8 PE=2 SV=1	Green	0.15137		1.02915
Hippocampus	P08413	Camk2b	Calcium/calmodulin-dependent protein kinase type II subunit beta OS=Rattus norvegicus OX=10116 GN=Camk2b PE=1 SV=1	Red	0.1515		-0.367371
Hippocampus	Q00981	Uchl1	Ubiquitin carboxyl-terminal hydrolase isozyme L1 OS=Rattus norvegicus OX=10116 GN=Uchl1 PE=1 SV=2	Red	0.15172		-0.137504
Hippocampus	P47727	Cbr1	Carbonyl reductase [NADPH] 1 OS=Rattus norvegicus OX=10116 GN=Cbr1 PE=1 SV=2	Red	0.15282		-0.189034
Hippocampus	P09456	Prkar1a	cAMP-dependent protein kinase type I-alpha regulatory subunit OS=Rattus norvegicus OX=10116 GN=Prkar1a PE=1 SV=2	Green	0.15349		-1.0072
Hippocampus	Q9Z0W5	Pacsin1	Protein kinase C and casein kinase substrate in neurons protein 1 OS=Rattus norvegicus OX=10116 GN=Pacsin1 PE=1 SV=1	Red	0.15356		-0.15056
Hippocampus	Q64361	Lxn	Latexin OS=Rattus norvegicus OX=10116 GN=Lxn PE=1 SV=1	Red	0.15361		-0.443607
Hippocampus	Q64548	Rtn1	Reticulon-1 OS=Rattus norvegicus OX=10116 GN=Rtn1 PE=1 SV=1	Red	0.15372		-0.201634
Hippocampus	Q6P7S1	Asah1	Acid ceramidase OS=Rattus norvegicus OX=10116 GN=Asah1 PE=1 SV=1	Red	0.15423		0.599462
Hippocampus	P82995	Hsp90aa1	Heat shock protein HSP 90-alpha OS=Rattus norvegicus OX=10116 GN=Hsp90aa1 PE=1 SV=3	Red	0.15455		0.168123
Hippocampus	Q5FVC2	Arhgef2	Rho guanine nucleotide exchange factor 2 OS=Rattus norvegicus OX=10116 GN=Arhgef2 PE=1 SV=1	Red	0.15522		0.415037
Hippocampus	P62243	Rps8	40S ribosomal protein S8 OS=Rattus norvegicus OX=10116 GN=Rps8 PE=1 SV=2	Red	0.15628		0.304006
Hippocampus	P70580	Pgrmc1	Membrane-associated progesterone receptor component 1 OS=Rattus norvegicus OX=10116 GN=Pgrmc1 PE=1 SV=3	Red	0.1565		0.713119
Hippocampus	P62749	Hpcal1	Hippocalcin-like protein 1 OS=Rattus norvegicus OX=10116 GN=Hpcal1 PE=1 SV=2	Green	0.1566		1.35845
Hippocampus	O35964	Sh3gl1	Endophilin-A2 OS=Rattus norvegicus OX=10116 GN=Sh3gl1 PE=1 SV=1	Red	0.15688		-0.739848
Hippocampus	P43138	Apex1	DNA-(apurinic or apyrimidinic site) endonuclease OS=Rattus norvegicus OX=10116 GN=Apex1 PE=1 SV=2	Green	0.15722		4.05889
Hippocampus	P48721	Hspa9	Stress-70 protein, mitochondrial OS=Rattus norvegicus OX=10116 GN=Hspa9 PE=1 SV=3	Red	0.15737		0.184425
Hippocampus	P09895	Rpl5	60S ribosomal protein L5 OS=Rattus norvegicus OX=10116 GN=Rpl5 PE=1 SV=3	Red	0.159		-0.565597
Hippocampus	P51635	Akr1a1	Aldo-keto reductase family 1 member A1 OS=Rattus norvegicus OX=10116 GN=Akr1a1 PE=1 SV=2	Red	0.15915		-0.238787
Hippocampus	P56574	Idh2	Isocitrate dehydrogenase [NADP], mitochondrial OS=Rattus norvegicus OX=10116 GN=Idh2 PE=1 SV=2	Red	0.15944		-0.344828
Hippocampus	P18422	Psma3	Proteasome subunit alpha type-3 OS=Rattus norvegicus OX=10116 GN=Psma3 PE=1 SV=3	Red	0.16052		0.234465
Hippocampus	P07335	Ckb	Creatine kinase B-type OS=Rattus norvegicus OX=10116 GN=Ckb PE=1 SV=2	Red	0.16054		-0.124328
Hippocampus	Q9ESH6	Glrx	Glutaredoxin-1 OS=Rattus norvegicus OX=10116 GN=Glrx PE=3 SV=3	Red	0.16106		-0.411426
Hippocampus	P50878	Rpl4	60S ribosomal protein L4 OS=Rattus norvegicus OX=10116 GN=Rpl4 PE=1 SV=3	Red	0.1612		0.304006
Hippocampus	Q80W98	Sgtb	Small glutamine-rich tetratricopeptide repeat-containing protein beta OS=Rattus norvegicus OX=10116 GN=Sgtb PE=1 SV=1	Green	0.16175		1.68966
Hippocampus	O35458	Slc32a1	Vesicular inhibitory amino acid transporter OS=Rattus norvegicus OX=10116 GN=Slc32a1 PE=1 SV=1	Green	0.16185		1.05889
Hippocampus	P63245	Rack1	Receptor of activated protein C kinase 1 OS=Rattus norvegicus OX=10116 GN=Rack1 PE=1 SV=3	Red	0.16241		0.37707
Hippocampus	P21707	Syt1	Synaptotagmin-1 OS=Rattus norvegicus OX=10116 GN=Syt1 PE=1 SV=3	Red	0.16269		0.321928
Hippocampus	F1M386	Rapgef2	Rap guanine nucleotide exchange factor 2 OS=Rattus norvegicus OX=10116 GN=Rapgef2 PE=1 SV=2	Red	0.16276		-0.565597
Hippocampus	Q6AYG3	Prune1	Exopolyphosphatase PRUNE1 OS=Rattus norvegicus OX=10116 GN=Prune1 PE=1 SV=1	Red	0.16302		-0.422233
Hippocampus	Q9JHU0	Dpysl5	Dihydropyrimidinase-related protein 5 OS=Rattus norvegicus OX=10116 GN=Dpysl5 PE=1 SV=1	Red	0.16304		-0.333424
Hippocampus	Q9WTV5	Psmd9	26S proteasome non-ATPase regulatory subunit 9 OS=Rattus norvegicus OX=10116 GN=Psmd9 PE=1 SV=1	Red	0.16312		-0.378512
Hippocampus	P19627	Gnaz	Guanine nucleotide-binding protein G(z) subunit alpha OS=Rattus norvegicus OX=10116 GN=Gnaz PE=2 SV=3	Red	0.16326		0.836501
Hippocampus	O35314	Chgb	Secretogranin-1 OS=Rattus norvegicus OX=10116 GN=Chgb PE=1 SV=2	Red	0.16335		0.577767
Hippocampus	P17220	Psma2	Proteasome subunit alpha type-2 OS=Rattus norvegicus OX=10116 GN=Psma2 PE=1 SV=3	Red	0.16344		-0.475085
Hippocampus	P63036	Dnaja1	DnaJ homolog subfamily A member 1 OS=Rattus norvegicus OX=10116 GN=Dnaja1 PE=1 SV=1	Green	0.16345		1.18442
Hippocampus	O08662	Pi4ka	Phosphatidylinositol 4-kinase alpha OS=Rattus norvegicus OX=10116 GN=Pi4ka PE=1 SV=2	Green	0.16414		1.39593
Hippocampus	P22062	Pcmt1	Protein-L-isoaspartate(D-aspartate) O-methyltransferase OS=Rattus norvegicus OX=10116 GN=Pcmt1 PE=1 SV=2	Red	0.16422		-0.163499
Hippocampus	P04904	Gsta3	Glutathione S-transferase alpha-3 OS=Rattus norvegicus OX=10116 GN=Gsta3 PE=1 SV=3	Red	0.16429		-0.613532
Hippocampus	Q8K4K5	Llgl1	Lethal(2) giant larvae protein homolog 1 OS=Rattus norvegicus OX=10116 GN=Llgl1 PE=1 SV=1	Green	0.16527		-1.09761
Hippocampus	Q9Z272	Git1	ARF GTPase-activating protein GIT1 OS=Rattus norvegicus OX=10116 GN=Git1 PE=1 SV=1	Red	0.16543		-0.333424
Hippocampus	Q99MZ4	Ggt7	Glutathione hydrolase 7 OS=Rattus norvegicus OX=10116 GN=Ggt7 PE=1 SV=2	Green	0.1663		0.915936
Hippocampus	Q66HR2	Mapre1	Microtubule-associated protein RP/EB family member 1 OS=Rattus norvegicus OX=10116 GN=Mapre1 PE=1 SV=3	Red	0.16643		0.251539
Hippocampus	B0BN18	Pfdn2	Prefoldin subunit 2 OS=Rattus norvegicus OX=10116 GN=Pfdn2 PE=2 SV=1	Red	0.16701		-0.485427
Hippocampus	G3V9R8	Hnrnpc	Heterogeneous nuclear ribonucleoprotein C OS=Rattus norvegicus OX=10116 GN=Hnrnpc PE=1 SV=2	Red	0.16711		0.304006
Hippocampus	P20280	Rpl21	60S ribosomal protein L21 OS=Rattus norvegicus OX=10116 GN=Rpl21 PE=1 SV=3	Red	0.16753		0.599462
Hippocampus	P84100	Rpl19	60S ribosomal protein L19 OS=Rattus norvegicus OX=10116 GN=Rpl19 PE=1 SV=1	Red	0.16755		0.556393
Hippocampus	P04256	Hnrnpa1	Heterogeneous nuclear ribonucleoprotein A1 OS=Rattus norvegicus OX=10116 GN=Hnrnpa1 PE=1 SV=3	Red	0.16784		0.434403
Hippocampus	O70277	Trim3	Tripartite motif-containing protein 3 OS=Rattus norvegicus OX=10116 GN=Trim3 PE=1 SV=1	Green	0.16832		-1.28688
Hippocampus	P31399	Atp5pd	ATP synthase subunit d, mitochondrial OS=Rattus norvegicus OX=10116 GN=Atp5pd PE=1 SV=3	Red	0.16853		0.621488
Hippocampus	P83732	Rpl24	60S ribosomal protein L24 OS=Rattus norvegicus OX=10116 GN=Rpl24 PE=2 SV=1	Red	0.16877		0.358454
Hippocampus	Q63797	Psme1	Proteasome activator complex subunit 1 OS=Rattus norvegicus OX=10116 GN=Psme1 PE=2 SV=1	Red	0.16982		0.358454
Hippocampus	Q9Z270	Vapa	Vesicle-associated membrane protein-associated protein A OS=Rattus norvegicus OX=10116 GN=Vapa PE=1 SV=3	Red	0.17022		0.268817
Hippocampus	P24155	Thop1	Thimet oligopeptidase OS=Rattus norvegicus OX=10116 GN=Thop1 PE=1 SV=4	Red	0.17098		-0.250962
Hippocampus	Q63396	Sub1	Activated RNA polymerase II transcriptional coactivator p15 OS=Rattus norvegicus OX=10116 GN=Sub1 PE=1 SV=3	Red	0.17117		-0.432959
Hippocampus	P14882	Pcca	Propionyl-CoA carboxylase alpha chain, mitochondrial OS=Rattus norvegicus OX=10116 GN=Pcca PE=1 SV=3	Red	0.17172		-0.62293
Hippocampus	Q8K4M9	Osbpl1a	Oxysterol-binding protein-related protein 1 OS=Rattus norvegicus OX=10116 GN=Osbpl1a PE=1 SV=1	Red	0.17256		-0.411426
Hippocampus	Q62824	Exoc4	Exocyst complex component 4 OS=Rattus norvegicus OX=10116 GN=Exoc4 PE=1 SV=1	Red	0.17272		-0.367371
Hippocampus	P63055	Pcp4	Calmodulin regulator protein PCP4 OS=Rattus norvegicus OX=10116 GN=Pcp4 PE=1 SV=2	Red	0.17275		-0.389567
Hippocampus	P12368	Prkar2a	cAMP-dependent protein kinase type II-alpha regulatory subunit OS=Rattus norvegicus OX=10116 GN=Prkar2a PE=1 SV=4	Red	0.17302		-0.250962
Hippocampus	Q6DGG0	Ppid	Peptidyl-prolyl cis-trans isomerase D OS=Rattus norvegicus OX=10116 GN=Ppid PE=1 SV=3	Red	0.17389		-0.250962
Hippocampus	P62815	Atp6v1b2	V-type proton ATPase subunit B, brain isoform OS=Rattus norvegicus OX=10116 GN=Atp6v1b2 PE=1 SV=1	Red	0.17455		0.104697
Hippocampus	O70351	Hsd17b10	3-hydroxyacyl-CoA dehydrogenase type-2 OS=Rattus norvegicus OX=10116 GN=Hsd17b10 PE=1 SV=3	Red	0.17614		-0.275007
Hippocampus	Q5XIM9	Cct2	T-complex protein 1 subunit beta OS=Rattus norvegicus OX=10116 GN=Cct2 PE=1 SV=3	Red	0.17688		0.535332
Hippocampus	D4A6L0	Gpr158	Probable G-protein coupled receptor 158 OS=Rattus norvegicus OX=10116 GN=Gpr158 PE=1 SV=1	Green	0.17732		-1.12433
Hippocampus	Q63416	Itih3	Inter-alpha-trypsin inhibitor heavy chain H3 OS=Rattus norvegicus OX=10116 GN=Itih3 PE=2 SV=1	Red	0.17801		0.621488
Hippocampus	B0BNM9	GLTP	Glycolipid transfer protein OS=Rattus norvegicus OX=10116 GN=GLTP PE=2 SV=1	Red	0.17845		-0.344828
Hippocampus	Q63347	Psmc2	26S proteasome regulatory subunit 7 OS=Rattus norvegicus OX=10116 GN=Psmc2 PE=1 SV=3	Red	0.1785		0.643856
Hippocampus	Q02253	Aldh6a1	Methylmalonate-semialdehyde dehydrogenase [acylating], mitochondrial OS=Rattus norvegicus OX=10116 GN=Aldh6a1 PE=1 SV=1	Red	0.17858		0.251539
Hippocampus	P62902	Rpl31	60S ribosomal protein L31 OS=Rattus norvegicus OX=10116 GN=Rpl31 PE=2 SV=1	Red	0.17899		-0.189034
Hippocampus	P13383	Ncl	Nucleolin OS=Rattus norvegicus OX=10116 GN=Ncl PE=1 SV=3	Green	0.17899		-1.22651
Hippocampus	Q5FVI6	Atp6v1c1	V-type proton ATPase subunit C 1 OS=Rattus norvegicus OX=10116 GN=Atp6v1c1 PE=1 SV=1	Red	0.17921		-0.124328
Hippocampus	Q6PEC0	Nudt2	Bis(5'-nucleosyl)-tetraphosphatase [asymmetrical] OS=Rattus norvegicus OX=10116 GN=Nudt2 PE=2 SV=3	Red	0.18118		-0.389567
Hippocampus	Q6Q0N1	Cndp2	Cytosolic non-specific dipeptidase OS=Rattus norvegicus OX=10116 GN=Cndp2 PE=1 SV=1	Red	0.18147		-0.176323
Hippocampus	Q62868	Rock2	Rho-associated protein kinase 2 OS=Rattus norvegicus OX=10116 GN=Rock2 PE=1 SV=2	Red	0.18157		-0.31034
Hippocampus	Q9EQS0	Taldo1	Transaldolase OS=Rattus norvegicus OX=10116 GN=Taldo1 PE=1 SV=2	Red	0.18202		0.217591
Hippocampus	Q66X93	Snd1	Staphylococcal nuclease domain-containing protein 1 OS=Rattus norvegicus OX=10116 GN=Snd1 PE=1 SV=1	Red	0.18257		0.494109
Hippocampus	A8WCF8	Tprg1l	Tumor protein p63-regulated gene 1-like protein OS=Rattus norvegicus OX=10116 GN=Tprg1l PE=1 SV=1	Red	0.18317		0.454032
Hippocampus	Q4AEF8	Copg1	Coatomer subunit gamma-1 OS=Rattus norvegicus OX=10116 GN=Copg1 PE=2 SV=1	Green	0.1833		2.18442
Hippocampus	P12007	Ivd	Isovaleryl-CoA dehydrogenase, mitochondrial OS=Rattus norvegicus OX=10116 GN=Ivd PE=1 SV=2	Red	0.18348		-0.378512
Hippocampus	Q5MJ12	Fbxl16	F-box/LRR-repeat protein 16 OS=Rattus norvegicus OX=10116 GN=Fbxl16 PE=2 SV=1	Red	0.18378		-0.201634
Hippocampus	P62890	Rpl30	60S ribosomal protein L30 OS=Rattus norvegicus OX=10116 GN=Rpl30 PE=3 SV=2	Red	0.18395		0.217591
Hippocampus	Q9WU82	Ctnnb1	Catenin beta-1 OS=Rattus norvegicus OX=10116 GN=Ctnnb1 PE=1 SV=1	Green	0.18606		1.39593
Hippocampus	Q4QRB4	Tubb3	Tubulin beta-3 chain OS=Rattus norvegicus OX=10116 GN=Tubb3 PE=1 SV=1	Red	0.18825		-0.189034
Hippocampus	Q6AY56	Tuba8	Tubulin alpha-8 chain OS=Rattus norvegicus OX=10116 GN=Tuba8 PE=2 SV=1	Red	0.1892		-0.333424
Hippocampus	Q71UF4	Rbbp7	Histone-binding protein RBBP7 OS=Rattus norvegicus OX=10116 GN=Rbbp7 PE=2 SV=1	Red	0.18968		0.358454
Hippocampus	O35112	Alcam	CD166 antigen OS=Rattus norvegicus OX=10116 GN=Alcam PE=1 SV=1	Red	0.1903		0.810966
Hippocampus	P19139	Csnk2a1	Casein kinase II subunit alpha OS=Rattus norvegicus OX=10116 GN=Csnk2a1 PE=1 SV=2	Red	0.19041		-0.275007
Hippocampus	Q641Y5	Atg7	Ubiquitin-like modifier-activating enzyme ATG7 OS=Rattus norvegicus OX=10116 GN=Atg7 PE=2 SV=1	Green	0.19076		-3.1811
Hippocampus	P50430	Arsb	Arylsulfatase B OS=Rattus norvegicus OX=10116 GN=Arsb PE=2 SV=2	Red	0.19193		-0.613532
Hippocampus	Q04462	Vars1	Valine--tRNA ligase OS=Rattus norvegicus OX=10116 GN=Vars1 PE=2 SV=2	Red	0.19206		0.836501
Hippocampus	P24473	Gstk1	Glutathione S-transferase kappa 1 OS=Rattus norvegicus OX=10116 GN=Gstk1 PE=1 SV=3	Red	0.1921		0.514573
Hippocampus	Q641Y8	Ddx1	ATP-dependent RNA helicase DDX1 OS=Rattus norvegicus OX=10116 GN=Ddx1 PE=1 SV=1	Red	0.19227		-0.201634
Hippocampus	Q9EPC6	Pfn2	Profilin-2 OS=Rattus norvegicus OX=10116 GN=Pfn2 PE=1 SV=3	Red	0.19252		0.217591
Hippocampus	P68101	Eif2s1	Eukaryotic translation initiation factor 2 subunit 1 OS=Rattus norvegicus OX=10116 GN=Eif2s1 PE=1 SV=2	Red	0.19265		0.251539
Hippocampus	Q5PQN0	Ncald	Neurocalcin-delta OS=Rattus norvegicus OX=10116 GN=Ncald PE=1 SV=3	Red	0.19303		-0.298658
Hippocampus	Q5XIM7	Kars1	Lysine--tRNA ligase OS=Rattus norvegicus OX=10116 GN=Kars1 PE=1 SV=1	Red	0.19352		-0.422233
Hippocampus	Q08163	Cap1	Adenylyl cyclase-associated protein 1 OS=Rattus norvegicus OX=10116 GN=Cap1 PE=1 SV=3	Red	0.19618		-0.111031
Hippocampus	Q68FQ0	Cct5	T-complex protein 1 subunit epsilon OS=Rattus norvegicus OX=10116 GN=Cct5 PE=1 SV=1	Red	0.19842		-0.286881
Hippocampus	P63029	Tpt1	Translationally-controlled tumor protein OS=Rattus norvegicus OX=10116 GN=Tpt1 PE=1 SV=1	Red	0.19861		0.304006
Hippocampus	P25113	Pgam1	Phosphoglycerate mutase 1 OS=Rattus norvegicus OX=10116 GN=Pgam1 PE=1 SV=4	Red	0.19891		-0.163499
Hippocampus	Q68A21	Purb	Transcriptional activator protein Pur-beta OS=Rattus norvegicus OX=10116 GN=Purb PE=1 SV=3	Red	0.19911		-0.137504
Hippocampus	Q66H80	Arcn1	Coatomer subunit delta OS=Rattus norvegicus OX=10116 GN=Arcn1 PE=2 SV=1	Green	0.19964		-1.11103
Hippocampus	Q62703	Rcn2	Reticulocalbin-2 OS=Rattus norvegicus OX=10116 GN=Rcn2 PE=1 SV=2	Red	0.19981		-0.378512
Hippocampus	D3ZVR7	Prxl2b	Prostamide/prostaglandin F synthase OS=Rattus norvegicus OX=10116 GN=Prxl2b PE=3 SV=1	Green	0.19994		2.25154
Hippocampus	P07323	Eno2	Gamma-enolase OS=Rattus norvegicus OX=10116 GN=Eno2 PE=1 SV=2	Red	0.20068		-0.0840643
Hippocampus	P04631	S100b	Protein S100-B OS=Rattus norvegicus OX=10116 GN=S100b PE=1 SV=2	Red	0.20107		-0.275007
Hippocampus	P62856	Rps26	40S ribosomal protein S26 OS=Rattus norvegicus OX=10116 GN=Rps26 PE=3 SV=3	Red	0.20114		0.234465
Hippocampus	Q6P7P5	Bzw1	eIF5-mimic protein 2 OS=Rattus norvegicus OX=10116 GN=Bzw1 PE=1 SV=1	Red	0.20149		-0.545968
Hippocampus	Q5GFD9	Impact	Protein IMPACT OS=Rattus norvegicus OX=10116 GN=Impact PE=1 SV=1	Red	0.20277		-0.286881
Hippocampus	P47728	Calb2	Calretinin OS=Rattus norvegicus OX=10116 GN=Calb2 PE=1 SV=1	Red	0.20304		-0.83996
Hippocampus	Q5XI72	Eif4h	Eukaryotic translation initiation factor 4H OS=Rattus norvegicus OX=10116 GN=Eif4h PE=1 SV=1	Red	0.20316		-0.584963
Hippocampus	Q62698	Dync1li2	Cytoplasmic dynein 1 light intermediate chain 2 OS=Rattus norvegicus OX=10116 GN=Dync1li2 PE=1 SV=1	Red	0.20329		0.184425
Hippocampus	Q63413	Ddx39b	Spliceosome RNA helicase Ddx39b OS=Rattus norvegicus OX=10116 GN=Ddx39b PE=2 SV=3	Red	0.20351		-0.214125
Hippocampus	Q6RJR6	Rtn3	Reticulon-3 OS=Rattus norvegicus OX=10116 GN=Rtn3 PE=1 SV=1	Red	0.2039		-0.214125
Hippocampus	P97834	Gps1	COP9 signalosome complex subunit 1 OS=Rattus norvegicus OX=10116 GN=Gps1 PE=1 SV=1	Red	0.20401		0.304006
Hippocampus	P60881	Snap25	Synaptosomal-associated protein 25 OS=Rattus norvegicus OX=10116 GN=Snap25 PE=1 SV=1	Red	0.20499		0.340075
Hippocampus	D3ZQL7	Tppp	Tubulin polymerization-promoting protein OS=Rattus norvegicus OX=10116 GN=Tppp PE=1 SV=1	Red	0.20577		-0.124328
Hippocampus	Q63525	Nudc	Nuclear migration protein nudC OS=Rattus norvegicus OX=10116 GN=Nudc PE=1 SV=1	Red	0.20635		-0.400538
Hippocampus	Q8VHW5	Cacng8	Voltage-dependent calcium channel gamma-8 subunit OS=Rattus norvegicus OX=10116 GN=Cacng8 PE=1 SV=1	Red	0.20649		0.68966
Hippocampus	P27274	Cd59	CD59 glycoprotein OS=Rattus norvegicus OX=10116 GN=Cd59 PE=1 SV=2	Red	0.20655		0.454032
Hippocampus	P70483	Strn	Striatin OS=Rattus norvegicus OX=10116 GN=Strn PE=1 SV=1	Red	0.20691		-0.422233
Hippocampus	P50904	Rasa1	Ras GTPase-activating protein 1 OS=Rattus norvegicus OX=10116 GN=Rasa1 PE=1 SV=1	Red	0.20782		0.556393
Hippocampus	P62142	Ppp1cb	Serine/threonine-protein phosphatase PP1-beta catalytic subunit OS=Rattus norvegicus OX=10116 GN=Ppp1cb PE=1 SV=3	Red	0.20847		-0.367371
Hippocampus	O55166	Vps52	Vacuolar protein sorting-associated protein 52 homolog OS=Rattus norvegicus OX=10116 GN=Vps52 PE=1 SV=2	Green	0.21011		3.32193
Hippocampus	Q62825	Exoc3	Exocyst complex component 3 OS=Rattus norvegicus OX=10116 GN=Exoc3 PE=1 SV=1	Green	0.2108		1.05889
Hippocampus	B0BNA5	Cotl1	Coactosin-like protein OS=Rattus norvegicus OX=10116 GN=Cotl1 PE=1 SV=1	Red	0.21087		-0.163499
Hippocampus	F1LSG8	Vps50	Syndetin OS=Rattus norvegicus OX=10116 GN=Vps50 PE=1 SV=1	Red	0.21116		0.621488
Hippocampus	P28023	Dctn1	Dynactin subunit 1 OS=Rattus norvegicus OX=10116 GN=Dctn1 PE=1 SV=2	Red	0.21163		-0.124328
Hippocampus	P06302	Ptma	Prothymosin alpha OS=Rattus norvegicus OX=10116 GN=Ptma PE=1 SV=2	Red	0.21249		-0.321928
Hippocampus	Q32PX7	Fubp1	Far upstream element-binding protein 1 OS=Rattus norvegicus OX=10116 GN=Fubp1 PE=1 SV=1	Red	0.21288		0.415037
Hippocampus	P24090	Ahsg	Alpha-2-HS-glycoprotein OS=Rattus norvegicus OX=10116 GN=Ahsg PE=1 SV=2	Red	0.21358		-0.659925
Hippocampus	Q62696	Dlg1	Disks large homolog 1 OS=Rattus norvegicus OX=10116 GN=Dlg1 PE=1 SV=1	Red	0.21388		0.494109
Hippocampus	Q07205	Eif5	Eukaryotic translation initiation factor 5 OS=Rattus norvegicus OX=10116 GN=Eif5 PE=1 SV=1	Red	0.21438		-0.176323
Hippocampus	P13803	Etfa	Electron transfer flavoprotein subunit alpha, mitochondrial OS=Rattus norvegicus OX=10116 GN=Etfa PE=1 SV=4	Red	0.21443		0.268817
Hippocampus	O88761	Psmd1	26S proteasome non-ATPase regulatory subunit 1 OS=Rattus norvegicus OX=10116 GN=Psmd1 PE=1 SV=1	Red	0.21521		-0.201634
Hippocampus	Q6P502	Cct3	T-complex protein 1 subunit gamma OS=Rattus norvegicus OX=10116 GN=Cct3 PE=1 SV=1	Red	0.21528		0.168123
Hippocampus	P04797	Gapdh	Glyceraldehyde-3-phosphate dehydrogenase OS=Rattus norvegicus OX=10116 GN=Gapdh PE=1 SV=3	Red	0.21564		-0.111031
Hippocampus	Q5XI22	Acat2	Acetyl-CoA acetyltransferase, cytosolic OS=Rattus norvegicus OX=10116 GN=Acat2 PE=1 SV=1	Red	0.21625		-0.250962
Hippocampus	P61980	Hnrnpk	Heterogeneous nuclear ribonucleoprotein K OS=Rattus norvegicus OX=10116 GN=Hnrnpk PE=1 SV=1	Red	0.21755		0.184425
Hippocampus	Q9QYU4	Crym	Ketimine reductase mu-crystallin OS=Rattus norvegicus OX=10116 GN=Crym PE=1 SV=1	Red	0.21827		-0.226509
Hippocampus	Q9ER34	Aco2	Aconitate hydratase, mitochondrial OS=Rattus norvegicus OX=10116 GN=Aco2 PE=1 SV=2	Red	0.21877		-0.0976108
Hippocampus	Q4VSI4	Usp7	Ubiquitin carboxyl-terminal hydrolase 7 OS=Rattus norvegicus OX=10116 GN=Usp7 PE=1 SV=1	Green	0.21993		1.12029
Hippocampus	P38659	Pdia4	Protein disulfide-isomerase A4 OS=Rattus norvegicus OX=10116 GN=Pdia4 PE=1 SV=2	Red	0.22035		0.915936
Hippocampus	O35824	Dnaja2	DnaJ homolog subfamily A member 2 OS=Rattus norvegicus OX=10116 GN=Dnaja2 PE=1 SV=1	Red	0.22205		0.184425
Hippocampus	Q64620	Ppp6c	Serine/threonine-protein phosphatase 6 catalytic subunit OS=Rattus norvegicus OX=10116 GN=Ppp6c PE=2 SV=2	Red	0.22206		-0.632268
Hippocampus	P18298	Mat2a	S-adenosylmethionine synthase isoform type-2 OS=Rattus norvegicus OX=10116 GN=Mat2a PE=1 SV=1	Red	0.22213		-0.201634
Hippocampus	P13233	Cnp	2',3'-cyclic-nucleotide 3'-phosphodiesterase OS=Rattus norvegicus OX=10116 GN=Cnp PE=1 SV=2	Red	0.22269		0.184425
Hippocampus	P63012	Rab3a	Ras-related protein Rab-3A OS=Rattus norvegicus OX=10116 GN=Rab3a PE=1 SV=1	Red	0.2227		-0.137504
Hippocampus	Q63716	Prdx1	Peroxiredoxin-1 OS=Rattus norvegicus OX=10116 GN=Prdx1 PE=1 SV=1	Red	0.22317		0.0740006
Hippocampus	Q07266	Dbn1	Drebrin OS=Rattus norvegicus OX=10116 GN=Dbn1 PE=1 SV=3	Red	0.22374		-0.263034
Hippocampus	Q499N6	Ubxn1	UBX domain-containing protein 1 OS=Rattus norvegicus OX=10116 GN=Ubxn1 PE=3 SV=2	Red	0.22414		-0.495695
Hippocampus	P62628	Dynlrb1	Dynein light chain roadblock-type 1 OS=Rattus norvegicus OX=10116 GN=Dynlrb1 PE=1 SV=3	Red	0.22454		0.217591
Hippocampus	B2RZ37	Reep5	Receptor expression-enhancing protein 5 OS=Rattus norvegicus OX=10116 GN=Reep5 PE=1 SV=1	Red	0.22455		0.473931
Hippocampus	Q99MI7	Uba3	NEDD8-activating enzyme E1 catalytic subunit OS=Rattus norvegicus OX=10116 GN=Uba3 PE=1 SV=1	Red	0.22476		-0.275007
Hippocampus	P84092	Ap2m1	AP-2 complex subunit mu OS=Rattus norvegicus OX=10116 GN=Ap2m1 PE=1 SV=1	Red	0.2249		0.184425
Hippocampus	Q6P6R2	Dld	Dihydrolipoyl dehydrogenase, mitochondrial OS=Rattus norvegicus OX=10116 GN=Dld PE=1 SV=1	Red	0.22498		0.152003
Hippocampus	P20760	Igg-2a	Ig gamma-2A chain C region OS=Rattus norvegicus OX=10116 GN=Igg-2a PE=1 SV=1	Red	0.22519		-0.910733
Hippocampus	P09117	Aldoc	Fructose-bisphosphate aldolase C OS=Rattus norvegicus OX=10116 GN=Aldoc PE=1 SV=3	Red	0.22523		-0.0840643
Hippocampus	Q63083	Nucb1	Nucleobindin-1 OS=Rattus norvegicus OX=10116 GN=Nucb1 PE=1 SV=1	Red	0.22614		0.37707
Hippocampus	Q5I0D1	Glod4	Glyoxalase domain-containing protein 4 OS=Rattus norvegicus OX=10116 GN=Glod4 PE=1 SV=1	Red	0.22665		-0.411426
Hippocampus	P02091	Hbb	Hemoglobin subunit beta-1 OS=Rattus norvegicus OX=10116 GN=Hbb PE=1 SV=3	Red	0.22686		0.136062
Hippocampus	Q9Z1A6	Hdlbp	Vigilin OS=Rattus norvegicus OX=10116 GN=Hdlbp PE=1 SV=1	Green	0.22723		-0.970854
Hippocampus	P54921	Napa	Alpha-soluble NSF attachment protein OS=Rattus norvegicus OX=10116 GN=Napa PE=1 SV=2	Red	0.22804		-0.286881
Hippocampus	F1M5N7	Kif21b	Kinesin-like protein KIF21B OS=Rattus norvegicus OX=10116 GN=Kif21b PE=1 SV=2	Red	0.22825		-0.275007
Hippocampus	B0BNN3	Ca1	Carbonic anhydrase 1 OS=Rattus norvegicus OX=10116 GN=Ca1 PE=1 SV=1	Red	0.22834		-0.214125
Hippocampus	P83868	Ptges3	Prostaglandin E synthase 3 OS=Rattus norvegicus OX=10116 GN=Ptges3 PE=1 SV=2	Red	0.23004		-0.124328
Hippocampus	Q4KM73	Cmpk1	UMP-CMP kinase OS=Rattus norvegicus OX=10116 GN=Cmpk1 PE=1 SV=2	Red	0.232		-0.201634
Hippocampus	P50399	Gdi2	Rab GDP dissociation inhibitor beta OS=Rattus norvegicus OX=10116 GN=Gdi2 PE=1 SV=2	Red	0.23311		0.0740006
Hippocampus	Q5SGE0	Lrpprc	Leucine-rich PPR motif-containing protein, mitochondrial OS=Rattus norvegicus OX=10116 GN=Lrpprc PE=1 SV=1	Red	0.23333		0.643856
Hippocampus	P84076	Hpca	Neuron-specific calcium-binding protein hippocalcin OS=Rattus norvegicus OX=10116 GN=Hpca PE=1 SV=2	Red	0.23358		-0.321928
Hippocampus	Q5XI83	Vps35l	VPS35 endosomal protein-sorting factor-like OS=Rattus norvegicus OX=10116 GN=Vps35l PE=2 SV=1	Red	0.23367		-0.367371
Hippocampus	O89049	Txnrd1	Thioredoxin reductase 1, cytoplasmic OS=Rattus norvegicus OX=10116 GN=Txnrd1 PE=1 SV=5	Red	0.23404		-0.176323
Hippocampus	P13221	Got1	Aspartate aminotransferase, cytoplasmic OS=Rattus norvegicus OX=10116 GN=Got1 PE=1 SV=3	Red	0.23425		-0.189034
Hippocampus	P62744	Ap2s1	AP-2 complex subunit sigma OS=Rattus norvegicus OX=10116 GN=Ap2s1 PE=1 SV=1	Red	0.23483		0.286304
Hippocampus	Q4FZT9	Psmd2	26S proteasome non-ATPase regulatory subunit 2 OS=Rattus norvegicus OX=10116 GN=Psmd2 PE=1 SV=1	Red	0.23531		-0.15056
Hippocampus	Q4KMA2	Rad23b	UV excision repair protein RAD23 homolog B OS=Rattus norvegicus OX=10116 GN=Rad23b PE=1 SV=1	Red	0.2354		-0.226509
Hippocampus	Q63270	Aco1	Cytoplasmic aconitate hydratase OS=Rattus norvegicus OX=10116 GN=Aco1 PE=1 SV=1	Red	0.23646		-0.344828
Hippocampus	Q6IRE4	Tsg101	Tumor susceptibility gene 101 protein OS=Rattus norvegicus OX=10116 GN=Tsg101 PE=1 SV=1	Red	0.23684		-0.584963
Hippocampus	Q5M9G3	Caprin1	Caprin-1 OS=Rattus norvegicus OX=10116 GN=Caprin1 PE=1 SV=2	Red	0.23793		0.577767
Hippocampus	P56603	Scamp1	Secretory carrier-associated membrane protein 1 OS=Rattus norvegicus OX=10116 GN=Scamp1 PE=1 SV=1	Red	0.23834		0.514573
Hippocampus	P31044	Pebp1	Phosphatidylethanolamine-binding protein 1 OS=Rattus norvegicus OX=10116 GN=Pebp1 PE=1 SV=3	Red	0.23871		-0.0565835
Hippocampus	P28037	Aldh1l1	Cytosolic 10-formyltetrahydrofolate dehydrogenase OS=Rattus norvegicus OX=10116 GN=Aldh1l1 PE=1 SV=3	Red	0.23883		-0.356144
Hippocampus	P42676	Nln	Neurolysin, mitochondrial OS=Rattus norvegicus OX=10116 GN=Nln PE=1 SV=1	Red	0.23936		0.415037
Hippocampus	O08557	Ddah1	N(G),N(G)-dimethylarginine dimethylaminohydrolase 1 OS=Rattus norvegicus OX=10116 GN=Ddah1 PE=1 SV=3	Red	0.2397		0.358454
Hippocampus	P97532	Mpst	3-mercaptopyruvate sulfurtransferase OS=Rattus norvegicus OX=10116 GN=Mpst PE=1 SV=3	Red	0.24378		0.217591
Hippocampus	P0C1X8	Aak1	AP2-associated protein kinase 1 OS=Rattus norvegicus OX=10116 GN=Aak1 PE=1 SV=1	Red	0.24395		-0.124328
Hippocampus	Q62951	Dpysl4	Dihydropyrimidinase-related protein 4 (Fragment) OS=Rattus norvegicus OX=10116 GN=Dpysl4 PE=1 SV=1	Red	0.24476		-0.275007
Hippocampus	Q9Z0W7	Clic4	Chloride intracellular channel protein 4 OS=Rattus norvegicus OX=10116 GN=Clic4 PE=1 SV=3	Red	0.24476		0.321928
Hippocampus	Q5BJU7	Wasf1	Wiskott-Aldrich syndrome protein family member 1 OS=Rattus norvegicus OX=10116 GN=Wasf1 PE=1 SV=1	Red	0.24483		-0.137504
Hippocampus	P10860	Glud1	Glutamate dehydrogenase 1, mitochondrial OS=Rattus norvegicus OX=10116 GN=Glud1 PE=1 SV=2	Red	0.24605		-0.15056
Hippocampus	P21533	Rpl6	60S ribosomal protein L6 OS=Rattus norvegicus OX=10116 GN=Rpl6 PE=1 SV=5	Red	0.24612		0.200913
Hippocampus	P40329	Rars1	Arginine--tRNA ligase, cytoplasmic OS=Rattus norvegicus OX=10116 GN=Rars1 PE=1 SV=2	Red	0.2462		-0.238787
Hippocampus	Q924N5	Acsbg1	Long-chain-fatty-acid--CoA ligase ACSBG1 OS=Rattus norvegicus OX=10116 GN=Acsbg1 PE=1 SV=1	Red	0.24661		0.168123
Hippocampus	Q63570	Psmc4	26S proteasome regulatory subunit 6B OS=Rattus norvegicus OX=10116 GN=Psmc4 PE=1 SV=1	Red	0.24731		-0.344828
Hippocampus	Q6AY86	Vps26a	Vacuolar protein sorting-associated protein 26A OS=Rattus norvegicus OX=10116 GN=Vps26a PE=1 SV=1	Red	0.24758		0.321928
Hippocampus	O08873	Madd	MAP kinase-activating death domain protein OS=Rattus norvegicus OX=10116 GN=Madd PE=1 SV=1	Red	0.24808		0.358454
Hippocampus	P04906	Gstp1	Glutathione S-transferase P OS=Rattus norvegicus OX=10116 GN=Gstp1 PE=1 SV=2	Red	0.24944		-0.176323
Hippocampus	Q6PDV7	Rpl10	60S ribosomal protein L10 OS=Rattus norvegicus OX=10116 GN=Rpl10 PE=1 SV=3	Red	0.25026		-0.263034
Hippocampus	P09951	Syn1	Synapsin-1 OS=Rattus norvegicus OX=10116 GN=Syn1 PE=1 SV=3	Red	0.25033		0.184425
Hippocampus	P62483	Kcnab2	Voltage-gated potassium channel subunit beta-2 OS=Rattus norvegicus OX=10116 GN=Kcnab2 PE=1 SV=1	Red	0.25093		0.395929
Hippocampus	P85968	Pgd	6-phosphogluconate dehydrogenase, decarboxylating OS=Rattus norvegicus OX=10116 GN=Pgd PE=1 SV=1	Red	0.25319		-0.111031
Hippocampus	Q9QXQ0	Actn4	Alpha-actinin-4 OS=Rattus norvegicus OX=10116 GN=Actn4 PE=1 SV=2	Red	0.25345		0.268817
Hippocampus	P04764	Eno1	Alpha-enolase OS=Rattus norvegicus OX=10116 GN=Eno1 PE=1 SV=4	Red	0.254		0.120294
Hippocampus	P13471	Rps14	40S ribosomal protein S14 OS=Rattus norvegicus OX=10116 GN=Rps14 PE=2 SV=3	Red	0.2557		0.184425
Hippocampus	P27682	Scg5	Neuroendocrine protein 7B2 OS=Rattus norvegicus OX=10116 GN=Scg5 PE=1 SV=1	Red	0.25577		0.358454
Hippocampus	P63331	Ppp2ca	Serine/threonine-protein phosphatase 2A catalytic subunit alpha isoform OS=Rattus norvegicus OX=10116 GN=Ppp2ca PE=1 SV=1	Red	0.25607		0.200913
Hippocampus	Q9WVR7	Ppm1f	Protein phosphatase 1F OS=Rattus norvegicus OX=10116 GN=Ppm1f PE=2 SV=1	Red	0.25724		-0.378512
Hippocampus	O35567	Atic	Bifunctional purine biosynthesis protein ATIC OS=Rattus norvegicus OX=10116 GN=Atic PE=1 SV=2	Red	0.25764		-0.111031
Hippocampus	O08838	Amph	Amphiphysin OS=Rattus norvegicus OX=10116 GN=Amph PE=1 SV=1	Red	0.25825		-0.0976108
Hippocampus	Q6MG82	Prrt1	Proline-rich transmembrane protein 1 OS=Rattus norvegicus OX=10116 GN=Prrt1 PE=1 SV=2	Red	0.25869		0.358454
Hippocampus	Q66HA6	Arl8b	ADP-ribosylation factor-like protein 8B OS=Rattus norvegicus OX=10116 GN=Arl8b PE=2 SV=1	Red	0.25967		0.268817
Hippocampus	B0BNA7	Eif3i	Eukaryotic translation initiation factor 3 subunit I OS=Rattus norvegicus OX=10116 GN=Eif3i PE=2 SV=1	Red	0.25986		0.514573
Hippocampus	Q5U318	Pea15	Astrocytic phosphoprotein PEA-15 OS=Rattus norvegicus OX=10116 GN=Pea15 PE=1 SV=1	Red	0.26032		0.104697
Hippocampus	P60522	Gabarapl2	Gamma-aminobutyric acid receptor-associated protein-like 2 OS=Rattus norvegicus OX=10116 GN=Gabarapl2 PE=3 SV=1	Red	0.26074		0.251539
Hippocampus	Q704S8	Crat	Carnitine O-acetyltransferase OS=Rattus norvegicus OX=10116 GN=Crat PE=1 SV=1	Red	0.26273		-0.722466
Hippocampus	P47967	Lgals5	Galectin-5 OS=Rattus norvegicus OX=10116 GN=Lgals5 PE=1 SV=2	Red	0.263		-0.422233
Hippocampus	Q9JKE3	Scamp5	Secretory carrier-associated membrane protein 5 OS=Rattus norvegicus OX=10116 GN=Scamp5 PE=2 SV=1	Red	0.26474		0.217591
Hippocampus	P18265	Gsk3a	Glycogen synthase kinase-3 alpha OS=Rattus norvegicus OX=10116 GN=Gsk3a PE=1 SV=1	Red	0.26544		0.136062
Hippocampus	P63319	Prkcg	Protein kinase C gamma type OS=Rattus norvegicus OX=10116 GN=Prkcg PE=1 SV=1	Red	0.26576		0.251539
Hippocampus	P20717	Padi2	Protein-arginine deiminase type-2 OS=Rattus norvegicus OX=10116 GN=Padi2 PE=1 SV=1	Red	0.26816		-0.238787
Hippocampus	P38983	Rpsa	40S ribosomal protein SA OS=Rattus norvegicus OX=10116 GN=Rpsa PE=1 SV=3	Red	0.26895		-0.176323
Hippocampus	P15650	Acadl	Long-chain specific acyl-CoA dehydrogenase, mitochondrial OS=Rattus norvegicus OX=10116 GN=Acadl PE=1 SV=1	Green	0.26926		-1.15056
Hippocampus	A0A0G2JTR4	Abr	Active breakpoint cluster region-related protein OS=Rattus norvegicus OX=10116 GN=Abr PE=1 SV=2	Red	0.26927		-0.189034
Hippocampus	Q02563	Sv2a	Synaptic vesicle glycoprotein 2A OS=Rattus norvegicus OX=10116 GN=Sv2a PE=1 SV=2	Red	0.26937		0.234465
Hippocampus	P62168	Ncs1	Neuronal calcium sensor 1 OS=Rattus norvegicus OX=10116 GN=Ncs1 PE=1 SV=2	Red	0.26949		-0.201634
Hippocampus	P22831	Synpr	Synaptoporin OS=Rattus norvegicus OX=10116 GN=Synpr PE=1 SV=2	Red	0.26956		-0.238787
Hippocampus	P52759	Rida	2-iminobutanoate/2-iminopropanoate deaminase OS=Rattus norvegicus OX=10116 GN=Rida PE=1 SV=3	Red	0.27027		0.321928
Hippocampus	Q9Z1N4	Bpnt1	3'(2'),5'-bisphosphate nucleotidase 1 OS=Rattus norvegicus OX=10116 GN=Bpnt1 PE=1 SV=1	Red	0.27077		-0.15056
Hippocampus	B2RYW9	Fahd2	Fumarylacetoacetate hydrolase domain-containing protein 2 OS=Rattus norvegicus OX=10116 GN=Fahd2 PE=1 SV=1	Red	0.27123		0.184425
Hippocampus	P43425	Gng7	Guanine nucleotide-binding protein G(I)/G(S)/G(O) subunit gamma-7 OS=Rattus norvegicus OX=10116 GN=Gng7 PE=2 SV=2	Red	0.27124		0.434403
Hippocampus	O35244	Prdx6	Peroxiredoxin-6 OS=Rattus norvegicus OX=10116 GN=Prdx6 PE=1 SV=3	Red	0.27171		-0.0976108
Hippocampus	Q9WTT6	Gda	Guanine deaminase OS=Rattus norvegicus OX=10116 GN=Gda PE=1 SV=1	Red	0.2724		-0.15056
Hippocampus	P20595	Gucy1b1	Guanylate cyclase soluble subunit beta-1 OS=Rattus norvegicus OX=10116 GN=Gucy1b1 PE=1 SV=2	Green	0.2725		-1.53605
Hippocampus	P13084	Npm1	Nucleophosmin OS=Rattus norvegicus OX=10116 GN=Npm1 PE=1 SV=1	Red	0.27312		-0.286881
Hippocampus	Q60587	Hadhb	Trifunctional enzyme subunit beta, mitochondrial OS=Rattus norvegicus OX=10116 GN=Hadhb PE=1 SV=1	Red	0.27336		0.152003
Hippocampus	Q99NA5	Idh3a	Isocitrate dehydrogenase [NAD] subunit alpha, mitochondrial OS=Rattus norvegicus OX=10116 GN=Idh3a PE=1 SV=1	Red	0.27346		-0.0976108
Hippocampus	P83953	Kpna1	Importin subunit alpha-5 OS=Rattus norvegicus OX=10116 GN=Kpna1 PE=1 SV=1	Red	0.27373		0.304006
Hippocampus	P59215	Gnao1	Guanine nucleotide-binding protein G(o) subunit alpha OS=Rattus norvegicus OX=10116 GN=Gnao1 PE=1 SV=2	Red	0.27417		0.251539
Hippocampus	Q4QQT4	Ppp2r1b	Serine/threonine-protein phosphatase 2A 65 kDa regulatory subunit A beta isoform OS=Rattus norvegicus OX=10116 GN=Ppp2r1b PE=2 SV=1	Red	0.27491		-0.124328
Hippocampus	P85834	Tufm	Elongation factor Tu, mitochondrial OS=Rattus norvegicus OX=10116 GN=Tufm PE=1 SV=1	Red	0.27508		-0.111031
Hippocampus	Q3MIE4	Vat1	Synaptic vesicle membrane protein VAT-1 homolog OS=Rattus norvegicus OX=10116 GN=Vat1 PE=1 SV=1	Red	0.27577		-0.226509
Hippocampus	O35867	Ppp1r9a	Neurabin-1 OS=Rattus norvegicus OX=10116 GN=Ppp1r9a PE=1 SV=1	Green	0.27656		-1.09085
Hippocampus	P04785	P4hb	Protein disulfide-isomerase OS=Rattus norvegicus OX=10116 GN=P4hb PE=1 SV=2	Red	0.27728		0.184425
Hippocampus	Q6PDU1	Srsf2	Serine/arginine-rich splicing factor 2 OS=Rattus norvegicus OX=10116 GN=Srsf2 PE=1 SV=3	Red	0.27862		-0.0976108
Hippocampus	P13234	Camk4	Calcium/calmodulin-dependent protein kinase type IV OS=Rattus norvegicus OX=10116 GN=Camk4 PE=1 SV=3	Red	0.27991		-0.505891
Hippocampus	Q80Z29	Nampt	Nicotinamide phosphoribosyltransferase OS=Rattus norvegicus OX=10116 GN=Nampt PE=1 SV=1	Red	0.28026		0.415037
Hippocampus	Q62940	Nedd4	E3 ubiquitin-protein ligase NEDD4 OS=Rattus norvegicus OX=10116 GN=Nedd4 PE=1 SV=1	Red	0.28055		-0.910733
Hippocampus	Q5FVQ9	Tbce	Tubulin-specific chaperone E OS=Rattus norvegicus OX=10116 GN=Tbce PE=2 SV=1	Red	0.28103		-0.214125
Hippocampus	P63074	Eif4e	Eukaryotic translation initiation factor 4E OS=Rattus norvegicus OX=10116 GN=Eif4e PE=1 SV=1	Red	0.28279		-0.389567
Hippocampus	P35427	Rpl13a	60S ribosomal protein L13a OS=Rattus norvegicus OX=10116 GN=Rpl13a PE=1 SV=2	Red	0.28314		0.217591
Hippocampus	O54924	Exoc8	Exocyst complex component 8 OS=Rattus norvegicus OX=10116 GN=Exoc8 PE=1 SV=1	Red	0.28367		0.321928
Hippocampus	P13437	Acaa2	3-ketoacyl-CoA thiolase, mitochondrial OS=Rattus norvegicus OX=10116 GN=Acaa2 PE=1 SV=1	Red	0.28376		0.37707
Hippocampus	Q63484	Akt3	RAC-gamma serine/threonine-protein kinase OS=Rattus norvegicus OX=10116 GN=Akt3 PE=2 SV=2	Red	0.28439		-0.321928
Hippocampus	P05370	G6pdx	Glucose-6-phosphate 1-dehydrogenase OS=Rattus norvegicus OX=10116 GN=G6pdx PE=1 SV=3	Red	0.28538		0.152003
Hippocampus	P62824	Rab3c	Ras-related protein Rab-3C OS=Rattus norvegicus OX=10116 GN=Rab3c PE=1 SV=1	Red	0.28822		-0.189034
Hippocampus	P62909	Rps3	40S ribosomal protein S3 OS=Rattus norvegicus OX=10116 GN=Rps3 PE=1 SV=1	Red	0.28931		0.168123
Hippocampus	O55096	Dpp3	Dipeptidyl peptidase 3 OS=Rattus norvegicus OX=10116 GN=Dpp3 PE=1 SV=2	Red	0.28931		-0.163499
Hippocampus	O55156	Clip2	CAP-Gly domain-containing linker protein 2 OS=Rattus norvegicus OX=10116 GN=Clip2 PE=1 SV=1	Red	0.29066		0.184425
Hippocampus	P27653	Mthfd1	C-1-tetrahydrofolate synthase, cytoplasmic OS=Rattus norvegicus OX=10116 GN=Mthfd1 PE=1 SV=3	Red	0.29094		0.286304
Hippocampus	Q99N27	Snx1	Sorting nexin-1 OS=Rattus norvegicus OX=10116 GN=Snx1 PE=1 SV=1	Red	0.29188		0.184425
Hippocampus	B5DF89	Cul3	Cullin-3 OS=Rattus norvegicus OX=10116 GN=Cul3 PE=1 SV=2	Red	0.29206		-0.344828
Hippocampus	Q9ESW0	Ddb1	DNA damage-binding protein 1 OS=Rattus norvegicus OX=10116 GN=Ddb1 PE=1 SV=1	Red	0.2928		-0.201634
Hippocampus	P18418	Calr	Calreticulin OS=Rattus norvegicus OX=10116 GN=Calr PE=1 SV=1	Red	0.29336		-0.0976108
Hippocampus	P62083	Rps7	40S ribosomal protein S7 OS=Rattus norvegicus OX=10116 GN=Rps7 PE=1 SV=1	Red	0.29346		-0.137504
Hippocampus	Q91Z79	Ppfia3	Liprin-alpha-3 OS=Rattus norvegicus OX=10116 GN=Ppfia3 PE=1 SV=2	Red	0.29374		-0.275007
Hippocampus	Q64548-2	Rtn1	Isoform RTN1-S of Reticulon-1 OS=Rattus norvegicus OX=10116 GN=Rtn1	Red	0.29418		0.251539
Hippocampus	P09216	Prkce	Protein kinase C epsilon type OS=Rattus norvegicus OX=10116 GN=Prkce PE=1 SV=1	Red	0.29527		-0.137504
Hippocampus	P70645	Blmh	Bleomycin hydrolase OS=Rattus norvegicus OX=10116 GN=Blmh PE=1 SV=1	Red	0.29571		0.251539
Hippocampus	Q4V7C6	Gmps	GMP synthase [glutamine-hydrolyzing] OS=Rattus norvegicus OX=10116 GN=Gmps PE=1 SV=1	Red	0.2959		-0.731183
Hippocampus	P15865	H1-4	Histone H1.4 OS=Rattus norvegicus OX=10116 GN=H1-4 PE=1 SV=3	Red	0.29643		0.234465
Hippocampus	Q9WUS0	Ak4	Adenylate kinase 4, mitochondrial OS=Rattus norvegicus OX=10116 GN=Ak4 PE=2 SV=1	Red	0.29649		0.184425
Hippocampus	Q62876	Syngr1	Synaptogyrin-1 OS=Rattus norvegicus OX=10116 GN=Syngr1 PE=1 SV=1	Red	0.29747		0.104697
Hippocampus	Q91XU8	Cds2	Phosphatidate cytidylyltransferase 2 OS=Rattus norvegicus OX=10116 GN=Cds2 PE=1 SV=1	Red	0.29801		0.415037
Hippocampus	P01946	Hba1	Hemoglobin subunit alpha-1/2 OS=Rattus norvegicus OX=10116 GN=Hba1 PE=1 SV=3	Red	0.29806		-0.0976108
Hippocampus	P17078	Rpl35	60S ribosomal protein L35 OS=Rattus norvegicus OX=10116 GN=Rpl35 PE=1 SV=3	Red	0.2987		0.184425
Hippocampus	P28818	Rasgrf1	Ras-specific guanine nucleotide-releasing factor 1 OS=Rattus norvegicus OX=10116 GN=Rasgrf1 PE=1 SV=1	Red	0.29921		-0.333424
Hippocampus	Q91Y81	Septin2	Septin-2 OS=Rattus norvegicus OX=10116 GN=Septin2 PE=1 SV=1	Red	0.29978		0.340075
Hippocampus	Q5U1X1	Rexo2	Oligoribonuclease, mitochondrial OS=Rattus norvegicus OX=10116 GN=Rexo2 PE=2 SV=1	Red	0.30039		0.535332
Hippocampus	Q6NYB7	Rab1A	Ras-related protein Rab-1A OS=Rattus norvegicus OX=10116 GN=Rab1A PE=1 SV=3	Red	0.30081		-0.15056
Hippocampus	Q9EPH8	Pabpc1	Polyadenylate-binding protein 1 OS=Rattus norvegicus OX=10116 GN=Pabpc1 PE=1 SV=1	Red	0.30123		-0.189034
Hippocampus	Q8CG45	Akr7a2	Aflatoxin B1 aldehyde reductase member 2 OS=Rattus norvegicus OX=10116 GN=Akr7a2 PE=1 SV=2	Red	0.30134		-0.15056
Hippocampus	P85845	Fscn1	Fascin OS=Rattus norvegicus OX=10116 GN=Fscn1 PE=1 SV=2	Red	0.30511		0.0588937
Hippocampus	Q9JIX3	Fhit	Bis(5'-adenosyl)-triphosphatase OS=Rattus norvegicus OX=10116 GN=Fhit PE=1 SV=1	Red	0.30538		0.415037
Hippocampus	Q62651	Ech1	Delta(3,5)-Delta(2,4)-dienoyl-CoA isomerase, mitochondrial OS=Rattus norvegicus OX=10116 GN=Ech1 PE=1 SV=2	Red	0.30628		-0.298658
Hippocampus	P18088	Gad1	Glutamate decarboxylase 1 OS=Rattus norvegicus OX=10116 GN=Gad1 PE=1 SV=1	Red	0.30636		-0.250962
Hippocampus	P53678	Ap3m2	AP-3 complex subunit mu-2 OS=Rattus norvegicus OX=10116 GN=Ap3m2 PE=2 SV=1	Red	0.30749		-0.15056
Hippocampus	P07825	Syp	Synaptophysin OS=Rattus norvegicus OX=10116 GN=Syp PE=1 SV=1	Red	0.30815		-0.15056
Hippocampus	Q66HD0	Hsp90b1	Endoplasmin OS=Rattus norvegicus OX=10116 GN=Hsp90b1 PE=1 SV=2	Red	0.30853		-0.356144
Hippocampus	Q4QR85	Wdr77	Methylosome protein 50 OS=Rattus norvegicus OX=10116 GN=Wdr77 PE=1 SV=1	Red	0.30936		-0.298658
Hippocampus	Q5BK56	Gstm4	Glutathione S-transferase Mu 4 OS=Rattus norvegicus OX=10116 GN=Gstm4 PE=2 SV=1	Red	0.30966		-0.0426443
Hippocampus	P41562	Idh1	Isocitrate dehydrogenase [NADP] cytoplasmic OS=Rattus norvegicus OX=10116 GN=Idh1 PE=1 SV=1	Red	0.31054		-0.163499
Hippocampus	Q9WVK7	Hadh	Hydroxyacyl-coenzyme A dehydrogenase, mitochondrial OS=Rattus norvegicus OX=10116 GN=Hadh PE=2 SV=1	Red	0.31216		-0.356144
Hippocampus	Q5FVH2	Pld3	5'-3' exonuclease PLD3 OS=Rattus norvegicus OX=10116 GN=Pld3 PE=1 SV=1	Red	0.31221		0.136062
Hippocampus	Q68FX1	Mpi	Mannose-6-phosphate isomerase OS=Rattus norvegicus OX=10116 GN=Mpi PE=2 SV=1	Red	0.31243		-0.176323
Hippocampus	O54975	Xpnpep1	Xaa-Pro aminopeptidase 1 OS=Rattus norvegicus OX=10116 GN=Xpnpep1 PE=1 SV=1	Red	0.31293		0.0588937
Hippocampus	O88794	Pnpo	Pyridoxine-5'-phosphate oxidase OS=Rattus norvegicus OX=10116 GN=Pnpo PE=1 SV=1	Red	0.31331		0.104697
Hippocampus	Q91V33	Khdrbs1	KH domain-containing, RNA-binding, signal transduction-associated protein 1 OS=Rattus norvegicus OX=10116 GN=Khdrbs1 PE=1 SV=1	Red	0.31413		0.234465
Hippocampus	O35180	Sh3gl3	Endophilin-A3 OS=Rattus norvegicus OX=10116 GN=Sh3gl3 PE=1 SV=2	Red	0.31418		0.217591
Hippocampus	P48768	Slc8a2	Sodium/calcium exchanger 2 OS=Rattus norvegicus OX=10116 GN=Slc8a2 PE=1 SV=1	Red	0.31578		0.37707
Hippocampus	F1LU71	Auh	Methylglutaconyl-CoA hydratase, mitochondrial OS=Rattus norvegicus OX=10116 GN=Auh PE=1 SV=2	Red	0.31624		-0.137504
Hippocampus	P62703	Rps4x	40S ribosomal protein S4, X isoform OS=Rattus norvegicus OX=10116 GN=Rps4x PE=2 SV=2	Red	0.3176		0.152003
Hippocampus	O35264	Pafah1b2	Platelet-activating factor acetylhydrolase IB subunit alpha2 OS=Rattus norvegicus OX=10116 GN=Pafah1b2 PE=1 SV=1	Red	0.31846		0.104697
Hippocampus	Q5RKI0	Wdr1	WD repeat-containing protein 1 OS=Rattus norvegicus OX=10116 GN=Wdr1 PE=1 SV=3	Red	0.31864		-0.0703893
Hippocampus	Q6PCT3	Tpd52l2	Tumor protein D54 OS=Rattus norvegicus OX=10116 GN=Tpd52l2 PE=1 SV=1	Red	0.31952		0.104697
Hippocampus	Q6P747	Hp1bp3	Heterochromatin protein 1-binding protein 3 OS=Rattus norvegicus OX=10116 GN=Hp1bp3 PE=1 SV=1	Red	0.31989		0.321928
Hippocampus	P34058	Hsp90ab1	Heat shock protein HSP 90-beta OS=Rattus norvegicus OX=10116 GN=Hsp90ab1 PE=1 SV=4	Red	0.32057		-0.0703893
Hippocampus	P27952	Rps2	40S ribosomal protein S2 OS=Rattus norvegicus OX=10116 GN=Rps2 PE=1 SV=1	Red	0.32145		0.120294
Hippocampus	O35828	Coro7	Coronin-7 OS=Rattus norvegicus OX=10116 GN=Coro7 PE=1 SV=2	Red	0.3217		-0.298658
Hippocampus	Q6AYK6	Cacybp	Calcyclin-binding protein OS=Rattus norvegicus OX=10116 GN=Cacybp PE=1 SV=1	Red	0.32249		0.152003
Hippocampus	P61354	Rpl27	60S ribosomal protein L27 OS=Rattus norvegicus OX=10116 GN=Rpl27 PE=2 SV=2	Red	0.32281		-0.189034
Hippocampus	Q641X8	Eif3e	Eukaryotic translation initiation factor 3 subunit E OS=Rattus norvegicus OX=10116 GN=Eif3e PE=2 SV=1	Red	0.3239		-0.356144
Hippocampus	Q8VHF5	Cs	Citrate synthase, mitochondrial OS=Rattus norvegicus OX=10116 GN=Cs PE=1 SV=1	Red	0.32403		-0.0976108
Hippocampus	Q6NX65	Pdcd10	Programmed cell death protein 10 OS=Rattus norvegicus OX=10116 GN=Pdcd10 PE=2 SV=1	Red	0.32436		-0.31034
Hippocampus	P35281	Rab10	Ras-related protein Rab-10 OS=Rattus norvegicus OX=10116 GN=Rab10 PE=1 SV=1	Red	0.32477		-0.163499
Hippocampus	P35467	S100a1	Protein S100-A1 OS=Rattus norvegicus OX=10116 GN=S100a1 PE=1 SV=3	Red	0.32488		-0.298658
Hippocampus	P97612	Faah	Fatty-acid amide hydrolase 1 OS=Rattus norvegicus OX=10116 GN=Faah PE=1 SV=1	Red	0.32521		0.395929
Hippocampus	Q6I7R3	Isoc1	Isochorismatase domain-containing protein 1 OS=Rattus norvegicus OX=10116 GN=Isoc1 PE=1 SV=1	Red	0.32554		0.577767
Hippocampus	Q6AY09	Hnrnph2	Heterogeneous nuclear ribonucleoprotein H2 OS=Rattus norvegicus OX=10116 GN=Hnrnph2 PE=1 SV=1	Red	0.32612		0.184425
Hippocampus	Q9ERH3	Wdr7	WD repeat-containing protein 7 OS=Rattus norvegicus OX=10116 GN=Wdr7 PE=1 SV=1	Red	0.32624		0.251539
Hippocampus	O35331	Pdxk	Pyridoxal kinase OS=Rattus norvegicus OX=10116 GN=Pdxk PE=1 SV=1	Red	0.3266		0.136062
Hippocampus	P62278	Rps13	40S ribosomal protein S13 OS=Rattus norvegicus OX=10116 GN=Rps13 PE=1 SV=2	Red	0.32738		0.136062
Hippocampus	Q3SWU3	Hnrnpdl	Heterogeneous nuclear ribonucleoprotein D-like OS=Rattus norvegicus OX=10116 GN=Hnrnpdl PE=1 SV=1	Red	0.32769		0.286304
Hippocampus	P17077	Rpl9	60S ribosomal protein L9 OS=Rattus norvegicus OX=10116 GN=Rpl9 PE=1 SV=1	Red	0.32871		-0.163499
Hippocampus	P39069	Ak1	Adenylate kinase isoenzyme 1 OS=Rattus norvegicus OX=10116 GN=Ak1 PE=1 SV=3	Red	0.32918		-0.238787
Hippocampus	P36876	Ppp2r2a	Serine/threonine-protein phosphatase 2A 55 kDa regulatory subunit B alpha isoform OS=Rattus norvegicus OX=10116 GN=Ppp2r2a PE=2 SV=1	Red	0.32927		-0.137504
Hippocampus	P47971	Nptx1	Neuronal pentraxin-1 OS=Rattus norvegicus OX=10116 GN=Nptx1 PE=1 SV=1	Red	0.3293		0.200913
Hippocampus	Q9Z339	Gsto1	Glutathione S-transferase omega-1 OS=Rattus norvegicus OX=10116 GN=Gsto1 PE=1 SV=2	Red	0.33095		-0.137504
Hippocampus	P17702	Rpl28	60S ribosomal protein L28 OS=Rattus norvegicus OX=10116 GN=Rpl28 PE=1 SV=4	Red	0.33098		0.251539
Hippocampus	P16884	Nefh	Neurofilament heavy polypeptide OS=Rattus norvegicus OX=10116 GN=Nefh PE=1 SV=4	Red	0.33114		0.184425
Hippocampus	P13668	Stmn1	Stathmin OS=Rattus norvegicus OX=10116 GN=Stmn1 PE=1 SV=2	Red	0.33255		-0.298658
Hippocampus	Q9JMJ4	Prpf19	Pre-mRNA-processing factor 19 OS=Rattus norvegicus OX=10116 GN=Prpf19 PE=1 SV=2	Red	0.33336		0.37707
Hippocampus	Q80W83	Ppp2r5b	Serine/threonine-protein phosphatase 2A 56 kDa regulatory subunit beta isoform OS=Rattus norvegicus OX=10116 GN=Ppp2r5b PE=2 SV=1	Red	0.33337		-0.137504
Hippocampus	P11348	Qdpr	Dihydropteridine reductase OS=Rattus norvegicus OX=10116 GN=Qdpr PE=1 SV=1	Red	0.33617		-0.0976108
Hippocampus	Q63635	Stx6	Syntaxin-6 OS=Rattus norvegicus OX=10116 GN=Stx6 PE=1 SV=1	Red	0.33658		0.415037
Hippocampus	P61314	Rpl15	60S ribosomal protein L15 OS=Rattus norvegicus OX=10116 GN=Rpl15 PE=1 SV=2	Red	0.33693		0.200913
Hippocampus	O88506	Stk39	STE20/SPS1-related proline-alanine-rich protein kinase OS=Rattus norvegicus OX=10116 GN=Stk39 PE=1 SV=2	Red	0.33916		0.184425
Hippocampus	P43244	Matr3	Matrin-3 OS=Rattus norvegicus OX=10116 GN=Matr3 PE=1 SV=2	Red	0.3395		0.136062
Hippocampus	Q1JU68	Eif3a	Eukaryotic translation initiation factor 3 subunit A OS=Rattus norvegicus OX=10116 GN=Eif3a PE=2 SV=2	Red	0.33952		0.136062
Hippocampus	P25093	Fah	Fumarylacetoacetase OS=Rattus norvegicus OX=10116 GN=Fah PE=1 SV=1	Red	0.33959		-0.189034
Hippocampus	P29315	Rnh1	Ribonuclease inhibitor OS=Rattus norvegicus OX=10116 GN=Rnh1 PE=1 SV=2	Red	0.33986		-0.163499
Hippocampus	Q62636	Rap1b	Ras-related protein Rap-1b OS=Rattus norvegicus OX=10116 GN=Rap1b PE=1 SV=2	Red	0.34023		-0.321928
Hippocampus	B0LT89	Stk24	Serine/threonine-protein kinase 24 OS=Rattus norvegicus OX=10116 GN=Stk24 PE=2 SV=1	Red	0.34134		0.168123
Hippocampus	P49088	Asns	Asparagine synthetase [glutamine-hydrolyzing] OS=Rattus norvegicus OX=10116 GN=Asns PE=2 SV=3	Red	0.34221		-0.163499
Hippocampus	O35509	Rab11b	Ras-related protein Rab-11B OS=Rattus norvegicus OX=10116 GN=Rab11b PE=1 SV=4	Red	0.34358		0.0892673
Hippocampus	P14942	Gsta4	Glutathione S-transferase alpha-4 OS=Rattus norvegicus OX=10116 GN=Gsta4 PE=1 SV=2	Red	0.34431		0.251539
Hippocampus	P43278	H1-0	Histone H1.0 OS=Rattus norvegicus OX=10116 GN=H1-0 PE=2 SV=2	Red	0.34502		0.168123
Hippocampus	O35274	Ppp1r9b	Neurabin-2 OS=Rattus norvegicus OX=10116 GN=Ppp1r9b PE=1 SV=1	Red	0.34578		-0.163499
Hippocampus	Q80W92	Vac14	Protein VAC14 homolog OS=Rattus norvegicus OX=10116 GN=Vac14 PE=1 SV=1	Red	0.3459		-0.62293
Hippocampus	P51583	Paics	Multifunctional protein ADE2 OS=Rattus norvegicus OX=10116 GN=Paics PE=1 SV=3	Red	0.34645		0.136062
Hippocampus	P10362	Scg2	Secretogranin-2 OS=Rattus norvegicus OX=10116 GN=Scg2 PE=1 SV=1	Red	0.34807		0.200913
Hippocampus	P97878	Exoc5	Exocyst complex component 5 OS=Rattus norvegicus OX=10116 GN=Exoc5 PE=1 SV=1	Red	0.3481		-0.321928
Hippocampus	Q568Z6	Ist1	IST1 homolog OS=Rattus norvegicus OX=10116 GN=Ist1 PE=2 SV=1	Red	0.34811		-0.298658
Hippocampus	O70593	Sgta	Small glutamine-rich tetratricopeptide repeat-containing protein alpha OS=Rattus norvegicus OX=10116 GN=Sgta PE=1 SV=1	Red	0.34828		0.136062
Hippocampus	P00507	Got2	Aspartate aminotransferase, mitochondrial OS=Rattus norvegicus OX=10116 GN=Got2 PE=1 SV=2	Red	0.3489		0.0588937
Hippocampus	P45479	Ppt1	Palmitoyl-protein thioesterase 1 OS=Rattus norvegicus OX=10116 GN=Ppt1 PE=1 SV=1	Red	0.34936		-0.176323
Hippocampus	Q63564	Sv2b	Synaptic vesicle glycoprotein 2B OS=Rattus norvegicus OX=10116 GN=Sv2b PE=1 SV=1	Red	0.34977		0.152003
Hippocampus	Q63617	Hyou1	Hypoxia up-regulated protein 1 OS=Rattus norvegicus OX=10116 GN=Hyou1 PE=1 SV=1	Red	0.35009		0.184425
Hippocampus	P70470	Lypla1	Acyl-protein thioesterase 1 OS=Rattus norvegicus OX=10116 GN=Lypla1 PE=1 SV=1	Red	0.35113		-0.286881
Hippocampus	P60901	Psma6	Proteasome subunit alpha type-6 OS=Rattus norvegicus OX=10116 GN=Psma6 PE=1 SV=1	Red	0.35122		0.0892673
Hippocampus	P19804	Nme2	Nucleoside diphosphate kinase B OS=Rattus norvegicus OX=10116 GN=Nme2 PE=1 SV=1	Red	0.35238		0.104697
Hippocampus	Q4G061	Eif3b	Eukaryotic translation initiation factor 3 subunit B OS=Rattus norvegicus OX=10116 GN=Eif3b PE=1 SV=1	Red	0.35401		-0.263034
Hippocampus	P24049	Rpl17	60S ribosomal protein L17 OS=Rattus norvegicus OX=10116 GN=Rpl17 PE=2 SV=3	Red	0.3541		0.217591
Hippocampus	P11980-2	Pkm	Isoform M2 of Pyruvate kinase PKM OS=Rattus norvegicus OX=10116 GN=Pkm	Red	0.35411		0.120294
Hippocampus	O35179	Sh3gl2	Endophilin-A1 OS=Rattus norvegicus OX=10116 GN=Sh3gl2 PE=1 SV=2	Red	0.35461		-0.137504
Hippocampus	Q3ZBA0	Tecpr1	Tectonin beta-propeller repeat-containing protein 1 OS=Rattus norvegicus OX=10116 GN=Tecpr1 PE=2 SV=1	Red	0.35535		-0.214125
Hippocampus	Q4G009	Mcts1	Malignant T-cell-amplified sequence 1 OS=Rattus norvegicus OX=10116 GN=Mcts1 PE=2 SV=1	Red	0.35584		-0.356144
Hippocampus	P50408	Atp6v1f	V-type proton ATPase subunit F OS=Rattus norvegicus OX=10116 GN=Atp6v1f PE=1 SV=1	Red	0.35593		0.0740006
Hippocampus	P09606	Glul	Glutamine synthetase OS=Rattus norvegicus OX=10116 GN=Glul PE=1 SV=3	Red	0.35607		-0.0426443
Hippocampus	O08773	Rgs14	Regulator of G-protein signaling 14 OS=Rattus norvegicus OX=10116 GN=Rgs14 PE=1 SV=1	Red	0.35693		-0.15056
Hippocampus	P63159	Hmgb1	High mobility group protein B1 OS=Rattus norvegicus OX=10116 GN=Hmgb1 PE=1 SV=2	Red	0.35746		0.0740006
Hippocampus	P04636	Mdh2	Malate dehydrogenase, mitochondrial OS=Rattus norvegicus OX=10116 GN=Mdh2 PE=1 SV=2	Red	0.35771		0.0439433
Hippocampus	P07483	Fabp3	Fatty acid-binding protein, heart OS=Rattus norvegicus OX=10116 GN=Fabp3 PE=1 SV=2	Red	0.35882		-0.124328
Hippocampus	P0DJJ3	Sgip1	SH3-containing GRB2-like protein 3-interacting protein 1 OS=Rattus norvegicus OX=10116 GN=Sgip1 PE=1 SV=1	Red	0.35888		-0.0840643
Hippocampus	Q6AXX6	Prxl2a	Peroxiredoxin-like 2A OS=Rattus norvegicus OX=10116 GN=Prxl2a PE=1 SV=1	Red	0.35902		0.136062
Hippocampus	Q64428	Hadha	Trifunctional enzyme subunit alpha, mitochondrial OS=Rattus norvegicus OX=10116 GN=Hadha PE=1 SV=2	Red	0.36059		0.251539
Hippocampus	P97526	Nf1	Neurofibromin OS=Rattus norvegicus OX=10116 GN=Nf1 PE=1 SV=1	Red	0.36097		0.37707
Hippocampus	F1M0Z1	Trio	Triple functional domain protein OS=Rattus norvegicus OX=10116 GN=Trio PE=1 SV=4	Red	0.36105		0.358454
Hippocampus	O35796	C1qbp	Complement component 1 Q subcomponent-binding protein, mitochondrial OS=Rattus norvegicus OX=10116 GN=C1qbp PE=1 SV=2	Red	0.36247		-0.0840643
Hippocampus	P26772	Hspe1	10 kDa heat shock protein, mitochondrial OS=Rattus norvegicus OX=10116 GN=Hspe1 PE=1 SV=3	Red	0.36268		-0.0426443
Hippocampus	D3ZQD3	Ogdhl	2-oxoglutarate dehydrogenase-like, mitochondrial OS=Rattus norvegicus OX=10116 GN=Ogdhl PE=1 SV=2	Red	0.36289		-0.378512
Hippocampus	Q4KM65	Nudt21	Cleavage and polyadenylation specificity factor subunit 5 OS=Rattus norvegicus OX=10116 GN=Nudt21 PE=2 SV=1	Red	0.36423		0.234465
Hippocampus	Q7TP47	Syncrip	Heterogeneous nuclear ribonucleoprotein Q OS=Rattus norvegicus OX=10116 GN=Syncrip PE=2 SV=1	Red	0.36425		0.0892673
Hippocampus	Q5HZY2	Sar1b	GTP-binding protein SAR1b OS=Rattus norvegicus OX=10116 GN=Sar1b PE=2 SV=1	Red	0.36482		0.494109
Hippocampus	Q9QUL6	Nsf	Vesicle-fusing ATPase OS=Rattus norvegicus OX=10116 GN=Nsf PE=1 SV=1	Red	0.36618		-0.0703893
Hippocampus	Q9EQX9	Ube2n	Ubiquitin-conjugating enzyme E2 N OS=Rattus norvegicus OX=10116 GN=Ube2n PE=1 SV=1	Red	0.36634		-0.0840643
Hippocampus	P26284	Pdha1	Pyruvate dehydrogenase E1 component subunit alpha, somatic form, mitochondrial OS=Rattus norvegicus OX=10116 GN=Pdha1 PE=1 SV=2	Red	0.36659		0.104697
Hippocampus	Q64591	Decr1	2,4-dienoyl-CoA reductase [(3E)-enoyl-CoA-producing], mitochondrial OS=Rattus norvegicus OX=10116 GN=Decr1 PE=1 SV=2	Red	0.36731		-0.286881
Hippocampus	Q5XIG8	Strap	Serine-threonine kinase receptor-associated protein OS=Rattus norvegicus OX=10116 GN=Strap PE=1 SV=1	Red	0.3676		0.217591
Hippocampus	Q920L2	Sdha	Succinate dehydrogenase [ubiquinone] flavoprotein subunit, mitochondrial OS=Rattus norvegicus OX=10116 GN=Sdha PE=1 SV=1	Red	0.36805		0.268817
Hippocampus	P49242	Rps3a	40S ribosomal protein S3a OS=Rattus norvegicus OX=10116 GN=Rps3a PE=1 SV=2	Red	0.36909		0.0740006
Hippocampus	Q6P6V0	Gpi	Glucose-6-phosphate isomerase OS=Rattus norvegicus OX=10116 GN=Gpi PE=1 SV=1	Red	0.37067		-0.0426443
Hippocampus	Q9JJ19	Slc9a3r1	Na(+)/H(+) exchange regulatory cofactor NHE-RF1 OS=Rattus norvegicus OX=10116 GN=Slc9a3r1 PE=1 SV=3	Red	0.37088		-0.137504
Hippocampus	D3ZQG6	Trim2	Tripartite motif-containing protein 2 OS=Rattus norvegicus OX=10116 GN=Trim2 PE=1 SV=2	Red	0.37145		-0.0565835
Hippocampus	P52296	Kpnb1	Importin subunit beta-1 OS=Rattus norvegicus OX=10116 GN=Kpnb1 PE=1 SV=1	Red	0.37163		-0.163499
Hippocampus	Q63081	Pdia6	Protein disulfide-isomerase A6 OS=Rattus norvegicus OX=10116 GN=Pdia6 PE=1 SV=2	Red	0.37431		-0.0703893
Hippocampus	Q6AXQ0	Sae1	SUMO-activating enzyme subunit 1 OS=Rattus norvegicus OX=10116 GN=Sae1 PE=2 SV=1	Red	0.37461		-0.124328
Hippocampus	P97576	Grpel1	GrpE protein homolog 1, mitochondrial OS=Rattus norvegicus OX=10116 GN=Grpel1 PE=1 SV=2	Red	0.37474		0.120294
Hippocampus	P00762	Prss1	Serine protease 1 OS=Rattus norvegicus OX=10116 GN=Prss1 PE=1 SV=1	Red	0.37662		0.136062
Hippocampus	P63045	Vamp2	Vesicle-associated membrane protein 2 OS=Rattus norvegicus OX=10116 GN=Vamp2 PE=1 SV=2	Red	0.37674		0.0740006
Hippocampus	Q5XIC0	Eci2	Enoyl-CoA delta isomerase 2 OS=Rattus norvegicus OX=10116 GN=Eci2 PE=1 SV=1	Red	0.37676		-0.124328
Hippocampus	Q7M0E3	Dstn	Destrin OS=Rattus norvegicus OX=10116 GN=Dstn PE=1 SV=3	Red	0.37778		-0.0703893
Hippocampus	Q63041	A1m	Alpha-1-macroglobulin OS=Rattus norvegicus OX=10116 GN=A1m PE=1 SV=1	Red	0.37805		0.286304
Hippocampus	P29066	Arrb1	Beta-arrestin-1 OS=Rattus norvegicus OX=10116 GN=Arrb1 PE=1 SV=1	Red	0.37821		0.0892673
Hippocampus	Q6P7Q4	Glo1	Lactoylglutathione lyase OS=Rattus norvegicus OX=10116 GN=Glo1 PE=1 SV=3	Red	0.37859		0.136062
Hippocampus	Q05546	Tnr	Tenascin-R OS=Rattus norvegicus OX=10116 GN=Tnr PE=1 SV=1	Red	0.37981		-0.0976108
Hippocampus	P23965	Eci1	Enoyl-CoA delta isomerase 1, mitochondrial OS=Rattus norvegicus OX=10116 GN=Eci1 PE=1 SV=1	Red	0.38213		0.168123
Hippocampus	Q6AY41	Tmem30a	Cell cycle control protein 50A OS=Rattus norvegicus OX=10116 GN=Tmem30a PE=1 SV=1	Red	0.38236		0.168123
Hippocampus	P41565	Idh3g	Isocitrate dehydrogenase [NAD] subunit gamma 1, mitochondrial OS=Rattus norvegicus OX=10116 GN=Idh3g PE=1 SV=2	Red	0.38238		-0.0565835
Hippocampus	P62912	Rpl32	60S ribosomal protein L32 OS=Rattus norvegicus OX=10116 GN=Rpl32 PE=1 SV=2	Red	0.38245		-0.15056
Hippocampus	Q63560	Map6	Microtubule-associated protein 6 OS=Rattus norvegicus OX=10116 GN=Map6 PE=1 SV=1	Red	0.38326		0.104697
Hippocampus	Q497B0	Nit2	Omega-amidase NIT2 OS=Rattus norvegicus OX=10116 GN=Nit2 PE=1 SV=1	Red	0.38329		0.200913
Hippocampus	P28480	Tcp1	T-complex protein 1 subunit alpha OS=Rattus norvegicus OX=10116 GN=Tcp1 PE=1 SV=1	Red	0.38412		-0.0565835
Hippocampus	Q9JJP9	Ubqln1	Ubiquilin-1 OS=Rattus norvegicus OX=10116 GN=Ubqln1 PE=1 SV=1	Red	0.38483		-0.163499
Hippocampus	B0BN93	Psmd13	26S proteasome non-ATPase regulatory subunit 13 OS=Rattus norvegicus OX=10116 GN=Psmd13 PE=1 SV=1	Red	0.38493		0.104697
Hippocampus	Q4V8F9	Hsdl2	Hydroxysteroid dehydrogenase-like protein 2 OS=Rattus norvegicus OX=10116 GN=Hsdl2 PE=2 SV=1	Red	0.38517		-0.344828
Hippocampus	P11884	Aldh2	Aldehyde dehydrogenase, mitochondrial OS=Rattus norvegicus OX=10116 GN=Aldh2 PE=1 SV=1	Red	0.38826		0.0588937
Hippocampus	Q62915	Cask	Peripheral plasma membrane protein CASK OS=Rattus norvegicus OX=10116 GN=Cask PE=1 SV=1	Red	0.38845		0.184425
Hippocampus	P35332	Hpcal4	Hippocalcin-like protein 4 OS=Rattus norvegicus OX=10116 GN=Hpcal4 PE=2 SV=2	Red	0.38851		-0.0840643
Hippocampus	Q5BJR4	Prune2	Protein prune homolog 2 OS=Rattus norvegicus OX=10116 GN=Prune2 PE=1 SV=1	Red	0.3888		0.0740006
Hippocampus	Q4FZT2	Ppme1	Protein phosphatase methylesterase 1 OS=Rattus norvegicus OX=10116 GN=Ppme1 PE=1 SV=2	Red	0.38924		-0.0976108
Hippocampus	O09178	Ampd3	AMP deaminase 3 OS=Rattus norvegicus OX=10116 GN=Ampd3 PE=1 SV=2	Red	0.3897		-0.189034
Hippocampus	O35814	Stip1	Stress-induced-phosphoprotein 1 OS=Rattus norvegicus OX=10116 GN=Stip1 PE=1 SV=1	Red	0.3897		0.0439433
Hippocampus	Q63598	Pls3	Plastin-3 OS=Rattus norvegicus OX=10116 GN=Pls3 PE=1 SV=2	Red	0.39042		0.104697
Hippocampus	P62914	Rpl11	60S ribosomal protein L11 OS=Rattus norvegicus OX=10116 GN=Rpl11 PE=1 SV=2	Red	0.39057		-0.0703893
Hippocampus	Q9EST6	Anp32b	Acidic leucine-rich nuclear phosphoprotein 32 family member B OS=Rattus norvegicus OX=10116 GN=Anp32b PE=1 SV=1	Red	0.39184		0.268817
Hippocampus	P62828	Ran	GTP-binding nuclear protein Ran OS=Rattus norvegicus OX=10116 GN=Ran PE=1 SV=3	Red	0.3927		-0.0976108
Hippocampus	P57113	Gstz1	Maleylacetoacetate isomerase OS=Rattus norvegicus OX=10116 GN=Gstz1 PE=1 SV=2	Red	0.39321		-0.163499
Hippocampus	P85973	Pnp	Purine nucleoside phosphorylase OS=Rattus norvegicus OX=10116 GN=Pnp PE=1 SV=1	Red	0.39328		-0.0426443
Hippocampus	Q9JJ31	Cul5	Cullin-5 OS=Rattus norvegicus OX=10116 GN=Cul5 PE=1 SV=3	Red	0.39357		0.217591
Hippocampus	Q68FX0	Idh3B	Isocitrate dehydrogenase [NAD] subunit beta, mitochondrial OS=Rattus norvegicus OX=10116 GN=Idh3B PE=2 SV=1	Red	0.39517		-0.0565835
Hippocampus	P63086	Mapk1	Mitogen-activated protein kinase 1 OS=Rattus norvegicus OX=10116 GN=Mapk1 PE=1 SV=3	Red	0.3955		0.0439433
Hippocampus	Q4KM74	Sec22b	Vesicle-trafficking protein SEC22b OS=Rattus norvegicus OX=10116 GN=Sec22b PE=1 SV=3	Red	0.39596		0.120294
Hippocampus	P04642	Ldha	L-lactate dehydrogenase A chain OS=Rattus norvegicus OX=10116 GN=Ldha PE=1 SV=1	Red	0.39798		-0.0426443
Hippocampus	Q6AYR2	Ndrg3	Protein NDRG3 OS=Rattus norvegicus OX=10116 GN=Ndrg3 PE=1 SV=1	Red	0.40004		0.120294
Hippocampus	P70566	Tmod2	Tropomodulin-2 OS=Rattus norvegicus OX=10116 GN=Tmod2 PE=1 SV=1	Red	0.40229		-0.137504
Hippocampus	P07632	Sod1	Superoxide dismutase [Cu-Zn] OS=Rattus norvegicus OX=10116 GN=Sod1 PE=1 SV=2	Red	0.40255		-0.0565835
Hippocampus	P29314	Rps9	40S ribosomal protein S9 OS=Rattus norvegicus OX=10116 GN=Rps9 PE=1 SV=4	Red	0.40323		-0.0976108
Hippocampus	P29411	Ak3	GTP:AMP phosphotransferase AK3, mitochondrial OS=Rattus norvegicus OX=10116 GN=Ak3 PE=2 SV=2	Red	0.40451		0.168123
Hippocampus	P05696	Prkca	Protein kinase C alpha type OS=Rattus norvegicus OX=10116 GN=Prkca PE=1 SV=3	Red	0.40505		0.104697
Hippocampus	Q66HA8	Hsph1	Heat shock protein 105 kDa OS=Rattus norvegicus OX=10116 GN=Hsph1 PE=1 SV=1	Red	0.40543		0.0291463
Hippocampus	Q5RJL0	Ermn	Ermin OS=Rattus norvegicus OX=10116 GN=Ermn PE=1 SV=1	Red	0.40555		-0.124328
Hippocampus	P05765	Rps21	40S ribosomal protein S21 OS=Rattus norvegicus OX=10116 GN=Rps21 PE=1 SV=1	Red	0.4057		0.0740006
Hippocampus	Q63941	Rab3b	Ras-related protein Rab-3B OS=Rattus norvegicus OX=10116 GN=Rab3b PE=1 SV=2	Red	0.40659		-0.0703893
Hippocampus	Q5RJQ4	Sirt2	NAD-dependent protein deacetylase sirtuin-2 OS=Rattus norvegicus OX=10116 GN=Sirt2 PE=1 SV=1	Red	0.40718		-0.0840643
Hippocampus	Q9Z0V6	Prdx3	Thioredoxin-dependent peroxide reductase, mitochondrial OS=Rattus norvegicus OX=10116 GN=Prdx3 PE=1 SV=2	Red	0.40941		0.0588937
Hippocampus	Q566R0	Them4	Acyl-coenzyme A thioesterase THEM4 OS=Rattus norvegicus OX=10116 GN=Them4 PE=2 SV=1	Red	0.4097		-0.0840643
Hippocampus	Q66HF8	Aldh1b1	Aldehyde dehydrogenase X, mitochondrial OS=Rattus norvegicus OX=10116 GN=Aldh1b1 PE=1 SV=1	Red	0.41081		0.0740006
Hippocampus	P28075	Psmb5	Proteasome subunit beta type-5 OS=Rattus norvegicus OX=10116 GN=Psmb5 PE=1 SV=3	Red	0.41128		0.0588937
Hippocampus	P10760	Ahcy	Adenosylhomocysteinase OS=Rattus norvegicus OX=10116 GN=Ahcy PE=1 SV=3	Red	0.4122		-0.0426443
Hippocampus	G3V9T7	Get3	ATPase Get3 OS=Rattus norvegicus OX=10116 GN=Get3 PE=1 SV=1	Red	0.41322		0.0740006
Hippocampus	P41123	Rpl13	60S ribosomal protein L13 OS=Rattus norvegicus OX=10116 GN=Rpl13 PE=1 SV=2	Red	0.41355		0.0439433
Hippocampus	O55043	Arhgef7	Rho guanine nucleotide exchange factor 7 OS=Rattus norvegicus OX=10116 GN=Arhgef7 PE=1 SV=1	Red	0.41487		-0.0703893
Hippocampus	P17074	Rps19	40S ribosomal protein S19 OS=Rattus norvegicus OX=10116 GN=Rps19 PE=2 SV=3	Red	0.41578		-0.0703893
Hippocampus	Q6AYR6	Hdhd2	Haloacid dehalogenase-like hydrolase domain-containing protein 2 OS=Rattus norvegicus OX=10116 GN=Hdhd2 PE=2 SV=1	Red	0.41591		0.0892673
Hippocampus	Q64560	Tpp2	Tripeptidyl-peptidase 2 OS=Rattus norvegicus OX=10116 GN=Tpp2 PE=2 SV=3	Red	0.41592		0.0892673
Hippocampus	P97536	Cand1	Cullin-associated NEDD8-dissociated protein 1 OS=Rattus norvegicus OX=10116 GN=Cand1 PE=1 SV=1	Red	0.41662		-0.0285692
Hippocampus	Q5U2R0	Mat2b	Methionine adenosyltransferase 2 subunit beta OS=Rattus norvegicus OX=10116 GN=Mat2b PE=2 SV=1	Red	0.41716		-0.111031
Hippocampus	Q5BJP3	Ufm1	Ubiquitin-fold modifier 1 OS=Rattus norvegicus OX=10116 GN=Ufm1 PE=3 SV=1	Red	0.4177		0.0588937
Hippocampus	Q8VI04	Asrgl1	Isoaspartyl peptidase/L-asparaginase OS=Rattus norvegicus OX=10116 GN=Asrgl1 PE=1 SV=1	Red	0.41823		-0.0426443
Hippocampus	Q63537	Syn2	Synapsin-2 OS=Rattus norvegicus OX=10116 GN=Syn2 PE=1 SV=1	Red	0.4188		-0.0703893
Hippocampus	Q99PF5	Khsrp	Far upstream element-binding protein 2 OS=Rattus norvegicus OX=10116 GN=Khsrp PE=1 SV=1	Red	0.42032		-0.0565835
Hippocampus	B2GV54	Nceh1	Neutral cholesterol ester hydrolase 1 OS=Rattus norvegicus OX=10116 GN=Nceh1 PE=1 SV=1	Red	0.42128		-0.176323
Hippocampus	Q1M168	Atcay	Caytaxin OS=Rattus norvegicus OX=10116 GN=Atcay PE=1 SV=1	Red	0.42167		-0.0840643
Hippocampus	D4A4T9	Chordc1	Cysteine and histidine-rich domain-containing protein 1 OS=Rattus norvegicus OX=10116 GN=Chordc1 PE=3 SV=1	Red	0.42196		-0.0976108
Hippocampus	P85972	Vcl	Vinculin OS=Rattus norvegicus OX=10116 GN=Vcl PE=1 SV=1	Red	0.42469		0.104697
Hippocampus	B1WC61	Acad9	Complex I assembly factor ACAD9, mitochondrial OS=Rattus norvegicus OX=10116 GN=Acad9 PE=1 SV=1	Red	0.42513		0.120294
Hippocampus	Q64537	Capns1	Calpain small subunit 1 OS=Rattus norvegicus OX=10116 GN=Capns1 PE=1 SV=3	Red	0.42611		-0.0565835
Hippocampus	P20059	Hpx	Hemopexin OS=Rattus norvegicus OX=10116 GN=Hpx PE=1 SV=3	Red	0.42624		-0.0976108
Hippocampus	B1H267	Snx5	Sorting nexin-5 OS=Rattus norvegicus OX=10116 GN=Snx5 PE=1 SV=1	Red	0.42677		0.136062
Hippocampus	P05426	Rpl7	60S ribosomal protein L7 OS=Rattus norvegicus OX=10116 GN=Rpl7 PE=1 SV=2	Red	0.42767		-0.0565835
Hippocampus	P62275	Rps29	40S ribosomal protein S29 OS=Rattus norvegicus OX=10116 GN=Rps29 PE=1 SV=2	Red	0.42781		0.104697
Hippocampus	Q05764	Add2	Beta-adducin OS=Rattus norvegicus OX=10116 GN=Add2 PE=1 SV=4	Red	0.42792		-0.0703893
Hippocampus	P67874	Csnk2b	Casein kinase II subunit beta OS=Rattus norvegicus OX=10116 GN=Csnk2b PE=1 SV=1	Red	0.4287		-0.0703893
Hippocampus	Q5U300	Uba1	Ubiquitin-like modifier-activating enzyme 1 OS=Rattus norvegicus OX=10116 GN=Uba1 PE=1 SV=1	Red	0.42907		0.0291463
Hippocampus	P24054	Sparcl1	SPARC-like protein 1 OS=Rattus norvegicus OX=10116 GN=Sparcl1 PE=1 SV=1	Red	0.42916		0.168123
Hippocampus	P04762	Cat	Catalase OS=Rattus norvegicus OX=10116 GN=Cat PE=1 SV=3	Red	0.43057		0.104697
Hippocampus	P05065	Aldoa	Fructose-bisphosphate aldolase A OS=Rattus norvegicus OX=10116 GN=Aldoa PE=1 SV=2	Red	0.43075		0.0144996
Hippocampus	P07943	Akr1b1	Aldo-keto reductase family 1 member B1 OS=Rattus norvegicus OX=10116 GN=Akr1b1 PE=1 SV=3	Red	0.43153		0.104697
Hippocampus	P12749	Rpl26	60S ribosomal protein L26 OS=Rattus norvegicus OX=10116 GN=Rpl26 PE=1 SV=1	Red	0.43161		0.0588937
Hippocampus	Q641Z2	Ptpn9	Tyrosine-protein phosphatase non-receptor type 9 OS=Rattus norvegicus OX=10116 GN=Ptpn9 PE=2 SV=1	Red	0.43256		-0.0976108
Hippocampus	Q5U2U2	Crkl	Crk-like protein OS=Rattus norvegicus OX=10116 GN=Crkl PE=1 SV=1	Red	0.43293		0.0892673
Hippocampus	P27605	Hprt1	Hypoxanthine-guanine phosphoribosyltransferase OS=Rattus norvegicus OX=10116 GN=Hprt1 PE=1 SV=1	Red	0.43414		0.0291463
Hippocampus	P62882	Gnb5	Guanine nucleotide-binding protein subunit beta-5 OS=Rattus norvegicus OX=10116 GN=Gnb5 PE=2 SV=1	Red	0.43419		0.0740006
Hippocampus	Q8K4F7	Dcps	m7GpppX diphosphatase OS=Rattus norvegicus OX=10116 GN=Dcps PE=2 SV=1	Red	0.43425		0.104697
Hippocampus	Q62785	Pdap1	28 kDa heat- and acid-stable phosphoprotein OS=Rattus norvegicus OX=10116 GN=Pdap1 PE=1 SV=1	Red	0.43437		0.0588937
Hippocampus	P97852	Hsd17b4	Peroxisomal multifunctional enzyme type 2 OS=Rattus norvegicus OX=10116 GN=Hsd17b4 PE=1 SV=3	Red	0.43604		-0.0703893
Hippocampus	P63018	Hspa8	Heat shock cognate 71 kDa protein OS=Rattus norvegicus OX=10116 GN=Hspa8 PE=1 SV=1	Red	0.43615		0.0291463
Hippocampus	P60825	Cirbp	Cold-inducible RNA-binding protein OS=Rattus norvegicus OX=10116 GN=Cirbp PE=2 SV=1	Red	0.43653		-0.0703893
Hippocampus	Q9JHW0	Psmb7	Proteasome subunit beta type-7 OS=Rattus norvegicus OX=10116 GN=Psmb7 PE=1 SV=1	Red	0.43693		0.0291463
Hippocampus	P18395	Csde1	Cold shock domain-containing protein E1 OS=Rattus norvegicus OX=10116 GN=Csde1 PE=2 SV=1	Red	0.43732		0.0588937
Hippocampus	P62076	Timm13	Mitochondrial import inner membrane translocase subunit Tim13 OS=Rattus norvegicus OX=10116 GN=Timm13 PE=3 SV=1	Red	0.43849		0.0291463
Hippocampus	P54690	Bcat1	Branched-chain-amino-acid aminotransferase, cytosolic OS=Rattus norvegicus OX=10116 GN=Bcat1 PE=1 SV=1	Red	0.43858		0.0291463
Hippocampus	O08629	Trim28	Transcription intermediary factor 1-beta OS=Rattus norvegicus OX=10116 GN=Trim28 PE=1 SV=2	Red	0.43892		0.0588937
Hippocampus	Q63228	Gmfb	Glia maturation factor beta OS=Rattus norvegicus OX=10116 GN=Gmfb PE=1 SV=2	Red	0.43972		0.0291463
Hippocampus	P62907	Rpl10a	60S ribosomal protein L10a OS=Rattus norvegicus OX=10116 GN=Rpl10a PE=1 SV=2	Red	0.44026		-0.0565835
Hippocampus	P47875	Csrp1	Cysteine and glycine-rich protein 1 OS=Rattus norvegicus OX=10116 GN=Csrp1 PE=1 SV=2	Red	0.44027		-0.0285692
Hippocampus	Q9WUC4	Atox1	Copper transport protein ATOX1 OS=Rattus norvegicus OX=10116 GN=Atox1 PE=1 SV=1	Red	0.4404		0.0291463
Hippocampus	D4A208	Srgap2	SLIT-ROBO Rho GTPase-activating protein 2 OS=Rattus norvegicus OX=10116 GN=Srgap2 PE=1 SV=1	Red	0.44071		-0.0565835
Hippocampus	Q99ML5	Pcyox1	Prenylcysteine oxidase OS=Rattus norvegicus OX=10116 GN=Pcyox1 PE=1 SV=1	Red	0.44189		-0.0840643
Hippocampus	P70500	Cdipt	CDP-diacylglycerol--inositol 3-phosphatidyltransferase OS=Rattus norvegicus OX=10116 GN=Cdipt PE=1 SV=1	Red	0.44197		-0.137504
[truncated: 84 more rows]
